# Supplementary material for: Membrane-Enriched Proteomics Link Ribosome Accumulation and Proteome Reprogramming With Cold Acclimation in Barley Root Meristems
Source: Front Plant Sci. 2021 Apr 30;12:656683. doi: 10.3389/fpls.2021.656683 (PMC8121087; doi:10.3389/fpls.2021.656683)
Supplement: Supplementary file 2 [file Table_2.XLSX]

## Sheet: Legend
Supplementary Table 2. Cellular component GO enrichment analysis comparing protein extraction methods in barley roots. Related to Figure 2; Supplementary Figure 2. The Fisher exact test followed by the FDR correction was done using the gene ontology resource (Mi et al., 2019). S2A (GO input TAB) contains the Hordeum vulgare gene IDs from proteins with sequenced peptides during LC-MS/MS of root ti…

## Sheet: S2A (GO input)
LB (916)	REB (1125)	Common (1700)	1
CON__P02533;CON__Q6IFX2;CON__Q04695;CON__Q9QWL7;CON__P19012;CON__P08727;CON__P19001;CON__A2A4G1;CON__Q9Z2K1;CON__Q3ZAW8;CON__Q61782	CON__P04264;CON__ENSEMBL:ENSBTAP00000038253;CON__Q922U2;CON__Q5XQN5;CON__Q8BGZ7;CON__P50446	CON__P00761	2
CON__P04264;CON__Q6IFZ6	CON__P13645;CON__P02535-1;CON__Q7Z3Y7;CON__Q148H6;CON__Q7Z3Y8;CON__ENSEMBL:ENSP00000377550;CON__Q3ZAW8;CON__P08779;CON__P02533;CON__A2A4G1;CON__P08730-1;CON__Q9Z2K1;CON__Q7Z3Z0;CON__O76013;CON__P19012;CON__Q7Z3Y9;CON__REFSEQ:XP_986630;CON__Q2M2I5;CON__P13646-1;CON__P08727;CON__O76014;CON__Q04695;CON__Q92764;CON__A2AB72;CON__Q6IFX2;CON__Q14532;CON__Q9QWL7;CON__P19001;CON__Q497I4;CON__P05784;CON__Q…	CON__Q86YZ3	3
CON__P08779	CON__P35527	HORVU0Hr1G000200.1	4
CON__P13645;CON__P02535-1;CON__P08730-1;CON__Q2M2I5;CON__P05784;CON__Q7Z3Y7;CON__Q148H6;CON__Q7Z3Y8;CON__REFSEQ:XP_986630;CON__O76014;CON__O76013;CON__Q14525;CON__O76015;CON__Q15323;CON__A2AB72;CON__Q7Z3Z0;CON__Q14532;CON__Q92764;CON__Q9UE12;CON__A2A5Y0;CON__Q497I4	CON__P35908v2;CON__P35908	HORVU0Hr1G000760.1;HORVU1Hr1G065660.1;HORVU0Hr1G000850.1	5
CON__P13647	CON__Q1A7A4	HORVU0Hr1G000810.2;HORVU1Hr1G065620.6;HORVU3Hr1G058600.2;HORVU1Hr1G090670.3;HORVU3Hr1G058700.1	6
CON__P20930	CON__Q32PJ2	HORVU1Hr1G065670.1;HORVU0Hr1G000840.1;HORVU0Hr1G000780.2	7
CON__P35527;CON__Q99456	HORVU0Hr1G000510.3	HORVU0Hr1G001270.3;HORVU3Hr1G038010.1;HORVU1Hr1G068440.2;HORVU2Hr1G016740.1;HORVU4Hr1G026290.1;HORVU5Hr1G044710.3	8
CON__P35908v2;CON__P35908;CON__O95678;CON__Q01546;CON__Q6NXH9;CON__Q8N1N4-2;CON__Q7RTT2;CON__Q7RTS7;CON__Q5XKE5;CON__Q32MB2	HORVU0Hr1G001340.1	HORVU0Hr1G004480.1	9
CON__REFSEQ:XP_932229	HORVU2Hr1G118240.5;HORVU0Hr1G002220.2;HORVU3Hr1G080790.2;HORVU1Hr1G069530.1;HORVU3Hr1G059290.2;HORVU5Hr1G053810.1	HORVU0Hr1G004700.1	10
HORVU7Hr1G066130.2;HORVU6Hr1G080640.1;HORVU3Hr1G117890.7;HORVU0Hr1G001070.1;HORVU1Hr1G069400.2;HORVU4Hr1G084510.2;HORVU4Hr1G087720.2;HORVU2Hr1G113120.1;HORVU5Hr1G022360.3;HORVU4Hr1G029350.13;HORVU5Hr1G001800.2;HORVU3Hr1G007590.6;HORVU3Hr1G006830.32;HORVU6Hr1G078810.22;HORVU3Hr1G093140.3;HORVU3Hr1G007540.9;HORVU7Hr1G073300.5;HORVU1Hr1G083220.9;HORVU5Hr1G110430.2;HORVU5Hr1G001020.2	HORVU6Hr1G050740.2;HORVU0Hr1G002340.1	HORVU0Hr1G005300.1	11
HORVU0Hr1G001600.2;HORVU1Hr1G094440.1	HORVU2Hr1G073150.1;HORVU0Hr1G004130.1	HORVU7Hr1G002060.1;HORVU0Hr1G006020.2;HORVU3Hr1G001140.5;HORVU0Hr1G006040.1;HORVU7Hr1G043940.1	12
HORVU2Hr1G118240.5;HORVU0Hr1G002220.2;HORVU3Hr1G080790.2;HORVU1Hr1G069530.1;HORVU3Hr1G059290.2;HORVU7Hr1G080800.2;HORVU5Hr1G053810.1	HORVU0Hr1G005860.1	HORVU0Hr1G008740.1	13
HORVU0Hr1G002340.1;HORVU6Hr1G050740.2	HORVU0Hr1G008690.1	HORVU0Hr1G008780.12	14
HORVU0Hr1G002680.2	HORVU0Hr1G008800.1;HORVU0Hr1G008750.1	HORVU5Hr1G018330.2;HORVU0Hr1G011560.1	15
HORVU0Hr1G002960.6	HORVU0Hr1G009470.2;HORVU4Hr1G090130.1;HORVU0Hr1G009390.2;HORVU4Hr1G090190.4;HORVU0Hr1G009410.1;HORVU4Hr1G090140.1;HORVU4Hr1G090120.1;HORVU0Hr1G009460.4;HORVU0Hr1G009440.4;HORVU0Hr1G009400.1;HORVU0Hr1G009450.1	HORVU0Hr1G011720.5;HORVU5Hr1G023760.1	16
HORVU2Hr1G073150.1;HORVU0Hr1G004130.1;HORVU7Hr1G104220.3;HORVU6Hr1G026350.1	HORVU4Hr1G018330.2;HORVU0Hr1G010920.1;HORVU5Hr1G036940.1	HORVU5Hr1G098740.1;HORVU0Hr1G011940.3;HORVU6Hr1G070770.1;HORVU2Hr1G012080.2;HORVU4Hr1G037800.1	17
HORVU0Hr1G008280.1	HORVU0Hr1G011510.1	HORVU0Hr1G012410.5;HORVU5Hr1G049670.2	18
HORVU0Hr1G008800.1;HORVU0Hr1G008750.1;HORVU5Hr1G021870.1;HORVU5Hr1G021860.1	HORVU0Hr1G013200.3	HORVU0Hr1G012940.6	19
HORVU0Hr1G009410.1;HORVU4Hr1G090140.1;HORVU4Hr1G090120.1;HORVU0Hr1G009460.4;HORVU0Hr1G009440.4;HORVU0Hr1G009400.1;HORVU0Hr1G009450.1;HORVU0Hr1G009470.2;HORVU4Hr1G090130.1;HORVU0Hr1G009390.2;HORVU4Hr1G090190.4	HORVU0Hr1G014400.1;HORVU5Hr1G124030.19	HORVU0Hr1G013290.1;HORVU5Hr1G076560.1	20
HORVU0Hr1G010070.1	HORVU0Hr1G015160.1;HORVU6Hr1G014320.1	HORVU0Hr1G013850.1	21
HORVU0Hr1G011280.2;HORVU5Hr1G029550.4;HORVU5Hr1G027240.2	HORVU0Hr1G015820.1	HORVU0Hr1G014070.1;HORVU5Hr1G112530.1	22
HORVU0Hr1G011450.1	HORVU0Hr1G016450.1	HORVU7Hr1G115980.1;HORVU0Hr1G015750.1;HORVU6Hr1G065260.1	23
HORVU0Hr1G013190.1;HORVU5Hr1G069690.1;HORVU5Hr1G069680.1;HORVU3Hr1G099160.1;HORVU4Hr1G058810.1;HORVU4Hr1G090910.2;HORVU6Hr1G009020.1;HORVU3Hr1G014560.1;HORVU5Hr1G082190.1;HORVU4Hr1G029280.1;HORVU3Hr1G068240.1;HORVU3Hr1G068320.2;HORVU5Hr1G108640.1	HORVU0Hr1G018300.1;HORVU7Hr1G046460.13;HORVU0Hr1G016360.1	HORVU0Hr1G016330.1;HORVU6Hr1G058840.1;HORVU2Hr1G089540.1;HORVU1Hr1G022060.1;HORVU2Hr1G089440.4;HORVU2Hr1G038140.1	24
HORVU0Hr1G013220.9	HORVU0Hr1G018380.1	HORVU0Hr1G016640.4;HORVU0Hr1G032110.1;HORVU6Hr1G067630.1;HORVU6Hr1G069110.3	25
HORVU0Hr1G014940.1;HORVU6Hr1G004180.9	HORVU0Hr1G018840.1	HORVU4Hr1G085830.5;HORVU6Hr1G013680.1;HORVU7Hr1G114670.1;HORVU6Hr1G068270.1;HORVU0Hr1G016660.4;HORVU1Hr1G056390.2;HORVU1Hr1G056380.1;HORVU3Hr1G110150.3;HORVU3Hr1G001070.1	26
HORVU0Hr1G015160.1	HORVU0Hr1G019770.1;HORVU7Hr1G093490.2	HORVU0Hr1G017020.1;HORVU2Hr1G013680.1;HORVU5Hr1G051280.1	27
HORVU0Hr1G017080.1;HORVU5Hr1G000150.4	HORVU0Hr1G020070.1;HORVU7Hr1G041660.1	HORVU0Hr1G017330.6	28
HORVU0Hr1G017120.2	HORVU0Hr1G020260.4	HORVU0Hr1G017350.1	29
HORVU6Hr1G081930.1;HORVU0Hr1G017230.2	HORVU0Hr1G021410.1	HORVU0Hr1G017360.1;HORVU7Hr1G029860.1	30
HORVU0Hr1G018300.1;HORVU0Hr1G016360.1;HORVU7Hr1G046460.13	HORVU0Hr1G022740.1;HORVU0Hr1G037770.2;HORVU7Hr1G067220.1;HORVU3Hr1G090610.1;HORVU0Hr1G033250.1;HORVU0Hr1G022750.1	HORVU0Hr1G017370.1	31
HORVU4Hr1G052660.1;HORVU2Hr1G004300.1;HORVU0Hr1G019930.1	HORVU0Hr1G023590.1;HORVU6Hr1G066380.1	HORVU0Hr1G017540.2	32
HORVU0Hr1G020790.1;HORVU7Hr1G052570.1	HORVU0Hr1G025410.1;HORVU4Hr1G048730.1;HORVU2Hr1G067660.1;HORVU7Hr1G078010.2;HORVU6Hr1G058050.3;HORVU0Hr1G018470.1;HORVU4Hr1G047410.2	HORVU0Hr1G018090.1;HORVU0Hr1G018030.1;HORVU6Hr1G094080.1	33
HORVU0Hr1G035440.1;HORVU0Hr1G030870.1;HORVU0Hr1G022730.1	HORVU6Hr1G063230.1;HORVU6Hr1G063190.1;HORVU0Hr1G025660.1	HORVU0Hr1G018200.1	34
HORVU7Hr1G067220.1;HORVU0Hr1G033250.1;HORVU0Hr1G022750.1;HORVU0Hr1G022740.1;HORVU0Hr1G037770.2;HORVU7Hr1G122870.1;HORVU7Hr1G122770.2;HORVU0Hr1G023080.5;HORVU3Hr1G090610.1	HORVU1Hr1G068170.1;HORVU0Hr1G026030.2;HORVU1Hr1G064870.3;CON__ENSEMBL:ENSBTAP00000025008	HORVU0Hr1G018510.1	35
HORVU0Hr1G032810.1;HORVU0Hr1G024540.1;HORVU0Hr1G036850.1;HORVU4Hr1G045220.1	HORVU1Hr1G065770.1;HORVU0Hr1G026700.1;HORVU7Hr1G034450.3;HORVU2Hr1G007660.2;HORVU2Hr1G022010.1;HORVU6Hr1G078400.2;HORVU7Hr1G063980.1	HORVU0Hr1G019700.2	36
HORVU0Hr1G026030.2;HORVU1Hr1G068170.1;HORVU1Hr1G064870.3	HORVU1Hr1G068790.1;HORVU0Hr1G027130.1;HORVU3Hr1G079700.1	HORVU0Hr1G019950.1;HORVU2Hr1G004420.1;HORVU1Hr1G051340.1;HORVU4Hr1G059400.2;HORVU7Hr1G072410.1;HORVU4Hr1G045340.3;HORVU6Hr1G049170.4;HORVU1Hr1G038040.1;HORVU4Hr1G045400.1	37
HORVU6Hr1G066160.1;HORVU0Hr1G026500.1	HORVU0Hr1G028350.1;HORVU6Hr1G084190.1	HORVU0Hr1G020750.15	38
HORVU0Hr1G026700.1;HORVU1Hr1G065770.1;HORVU7Hr1G063980.1	HORVU7Hr1G088190.6;HORVU5Hr1G064700.7;HORVU0Hr1G031270.1;HORVU0Hr1G029790.1;HORVU7Hr1G091620.6;HORVU6Hr1G049260.6;HORVU6Hr1G047870.6;HORVU0Hr1G027620.1;HORVU0Hr1G036870.1;HORVU7Hr1G065780.1;HORVU0Hr1G033030.1;HORVU3Hr1G048820.1;HORVU0Hr1G034320.1;HORVU2Hr1G084630.1;HORVU0Hr1G026090.1	HORVU0Hr1G021000.2	39
HORVU6Hr1G066330.1;HORVU0Hr1G027030.1	HORVU5Hr1G041880.1;HORVU0Hr1G030120.1;HORVU4Hr1G058930.1;HORVU2Hr1G081330.1;HORVU4Hr1G058890.1	HORVU0Hr1G021230.1	40
HORVU1Hr1G068790.1;HORVU0Hr1G027130.1;HORVU3Hr1G079700.1;HORVU2Hr1G054760.1	HORVU0Hr1G030870.1;HORVU0Hr1G035440.1;HORVU0Hr1G022730.1	HORVU0Hr1G021390.2	41
HORVU0Hr1G028680.4;HORVU1Hr1G068020.1;HORVU0Hr1G031700.1	HORVU0Hr1G031700.1;HORVU1Hr1G068020.1;HORVU0Hr1G028680.4	HORVU0Hr1G021640.3	42
HORVU7Hr1G088190.6;HORVU5Hr1G064700.7;HORVU0Hr1G031270.1;HORVU0Hr1G029790.1;HORVU7Hr1G091620.6;HORVU6Hr1G049260.6;HORVU0Hr1G036870.1;HORVU7Hr1G065780.1;HORVU0Hr1G033030.1;HORVU3Hr1G048820.1;HORVU0Hr1G034320.1;HORVU2Hr1G084630.1;HORVU0Hr1G026090.1;HORVU0Hr1G027620.1;HORVU6Hr1G047870.6	HORVU4Hr1G006530.2;HORVU0Hr1G031760.1	HORVU0Hr1G022310.6	43
HORVU5Hr1G041880.1;HORVU0Hr1G030120.1;HORVU4Hr1G058930.1;HORVU2Hr1G081330.1	HORVU6Hr1G066410.1;HORVU0Hr1G032400.1	HORVU0Hr1G023290.1;HORVU7Hr1G110660.2;HORVU1Hr1G068640.1	44
HORVU1Hr1G068580.1;HORVU0Hr1G030440.1	HORVU0Hr1G037100.1;HORVU0Hr1G033630.1;HORVU2Hr1G086530.1;HORVU2Hr1G015540.1;HORVU4Hr1G059530.1;HORVU6Hr1G040930.1;HORVU5Hr1G042630.1;HORVU5Hr1G093790.1;HORVU6Hr1G039050.1;HORVU3Hr1G004810.3	HORVU3Hr1G020770.1;HORVU0Hr1G026370.1;HORVU2Hr1G040960.1;HORVU2Hr1G040970.1	45
HORVU3Hr1G053770.2;HORVU0Hr1G031360.2;HORVU7Hr1G088200.3;HORVU6Hr1G049250.6;HORVU2Hr1G028800.2;HORVU0Hr1G033790.1;HORVU5Hr1G064710.3;HORVU0Hr1G029780.1	HORVU0Hr1G035760.1;HORVU5Hr1G026170.7	HORVU6Hr1G066550.1;HORVU0Hr1G027680.1	46
HORVU2Hr1G086530.1;HORVU2Hr1G015540.1;HORVU0Hr1G037100.1;HORVU0Hr1G033630.1;HORVU5Hr1G093790.1;HORVU6Hr1G040930.1;HORVU5Hr1G042630.1;HORVU4Hr1G059530.1	HORVU0Hr1G035840.3;HORVU5Hr1G012070.1	HORVU1Hr1G066090.2;HORVU0Hr1G031170.3	47
HORVU0Hr1G037190.2;HORVU7Hr1G085270.5	HORVU6Hr1G013670.17;HORVU0Hr1G038120.1;HORVU1Hr1G026320.6;HORVU3Hr1G071770.1;HORVU5Hr1G118270.1	HORVU0Hr1G031710.1;HORVU1Hr1G068030.1;HORVU3Hr1G078660.1	48
HORVU3Hr1G004670.1;HORVU1Hr1G038000.1;HORVU0Hr1G037700.1	HORVU0Hr1G038850.2	HORVU6Hr1G062980.1;HORVU0Hr1G032130.2	49
HORVU7Hr1G031720.3;HORVU0Hr1G038850.2	HORVU0Hr1G039040.9;HORVU5Hr1G106530.2;HORVU7Hr1G117100.2	HORVU5Hr1G072320.1;HORVU0Hr1G034150.1;HORVU1Hr1G009360.1;HORVU3Hr1G040840.1	50
HORVU0Hr1G039110.6;HORVU2Hr1G027230.2	HORVU0Hr1G039250.32	HORVU0Hr1G038890.1	51
HORVU0Hr1G039460.1	HORVU0Hr1G040310.2	HORVU0Hr1G039470.1	52
HORVU0Hr1G040180.3	HORVU1Hr1G000020.4	HORVU0Hr1G040340.1	53
HORVU1Hr1G000940.3	HORVU1Hr1G000310.1	HORVU0Hr1G040440.1	54
HORVU1Hr1G000960.10;HORVU2Hr1G047700.1	HORVU1Hr1G000960.10;HORVU2Hr1G047700.1;HORVU2Hr1G052690.2	HORVU1Hr1G000080.2	55
HORVU6Hr1G026610.1;HORVU1Hr1G001990.1;HORVU3Hr1G079670.1	HORVU1Hr1G001570.1	HORVU1Hr1G000710.1	56
HORVU1Hr1G003370.2;HORVU7Hr1G088940.1	HORVU1Hr1G001860.8	HORVU1Hr1G000810.2	57
HORVU1Hr1G006860.7;HORVU3Hr1G043870.1	HORVU5Hr1G036250.2;HORVU4Hr1G019840.1;HORVU1Hr1G002500.2	HORVU1Hr1G001850.3	58
HORVU1Hr1G006930.1	HORVU1Hr1G003370.2;HORVU2Hr1G119660.3;HORVU7Hr1G088940.1;HORVU7Hr1G119480.2	HORVU1Hr1G001950.2	59
HORVU1Hr1G007320.16	HORVU1Hr1G003630.3	HORVU1Hr1G002090.11	60
HORVU1Hr1G007600.14;HORVU1Hr1G007580.4	HORVU1Hr1G004720.1	HORVU1Hr1G002150.11;HORVU3Hr1G104600.4;HORVU7Hr1G008250.1;HORVU5Hr1G105250.2	61
HORVU1Hr1G007790.1	HORVU1Hr1G004960.1	HORVU1Hr1G002410.1	62
HORVU1Hr1G008130.1;HORVU7Hr1G119190.1;HORVU7Hr1G119320.1;HORVU3Hr1G114900.1	HORVU1Hr1G005450.1;HORVU4Hr1G059020.1;HORVU4Hr1G059040.2;HORVU5Hr1G104980.56;HORVU6Hr1G075440.6;HORVU7Hr1G037870.1	HORVU1Hr1G002760.2	63
HORVU4Hr1G016710.1;HORVU1Hr1G008500.1;HORVU7Hr1G021810.1	HORVU1Hr1G006860.7	HORVU1Hr1G002840.6	64
HORVU1Hr1G008830.2	HORVU1Hr1G007580.4	HORVU1Hr1G003940.5	65
HORVU1Hr1G012690.2	HORVU1Hr1G008130.1;HORVU7Hr1G119190.1;HORVU7Hr1G119320.1;HORVU3Hr1G114900.1;HORVU5Hr1G061010.8;HORVU3Hr1G116010.2	HORVU1Hr1G007310.1	66
HORVU1Hr1G013870.1	HORVU1Hr1G008160.3;HORVU3Hr1G113750.1;HORVU3Hr1G054660.1;HORVU2Hr1G112000.1;HORVU2Hr1G056160.2;HORVU6Hr1G023630.1	HORVU1Hr1G007480.1	67
HORVU1Hr1G014590.1	HORVU1Hr1G010130.1	HORVU1Hr1G008120.1	68
HORVU1Hr1G016840.2;HORVU1Hr1G016870.1	HORVU1Hr1G011430.1	HORVU1Hr1G008250.12	69
HORVU1Hr1G017050.3	HORVU1Hr1G016080.6	HORVU1Hr1G011930.1;HORVU1Hr1G011950.2	70
HORVU1Hr1G017120.3;HORVU3Hr1G041820.4	HORVU1Hr1G016240.1	HORVU1Hr1G011990.2	71
HORVU1Hr1G017580.1	HORVU1Hr1G016870.1;HORVU1Hr1G016840.2	HORVU1Hr1G012140.5	72
HORVU6Hr1G031580.1;HORVU1Hr1G058450.2;HORVU6Hr1G029200.1;HORVU1Hr1G058490.4;HORVU2Hr1G090210.1;HORVU6Hr1G029190.1;HORVU7Hr1G032270.1;HORVU4Hr1G067970.1;HORVU2Hr1G074240.4;HORVU1Hr1G022400.1;HORVU7Hr1G034470.1;HORVU7Hr1G029190.1;HORVU7Hr1G025200.1;HORVU4Hr1G073150.1;HORVU1Hr1G020070.2;HORVU7Hr1G021840.15;HORVU1Hr1G020050.3;HORVU6Hr1G011520.1;HORVU7Hr1G025160.2;HORVU3Hr1G063270.2;HORVU7Hr1G100450.1…	HORVU1Hr1G016980.1	HORVU1Hr1G013740.1	73
HORVU6Hr1G011020.1;HORVU7Hr1G100410.1;HORVU2Hr1G098340.4;HORVU1Hr1G079440.1;HORVU1Hr1G029090.2;HORVU5Hr1G079130.1;HORVU1Hr1G071210.4;HORVU7Hr1G043300.1;HORVU3Hr1G023460.1;HORVU6Hr1G011510.1;HORVU6Hr1G013530.1;HORVU5Hr1G087870.1;HORVU1Hr1G052030.2;HORVU2Hr1G097990.1;HORVU1Hr1G071780.44;HORVU4Hr1G023200.1;HORVU5Hr1G087830.1;HORVU2Hr1G099490.1;HORVU5Hr1G086620.4;HORVU1Hr1G066960.1;HORVU1Hr1G070700.2…	HORVU1Hr1G017050.3;HORVU5Hr1G006630.5;HORVU3Hr1G117390.1;HORVU3Hr1G117370.1	HORVU1Hr1G013820.5	74
HORVU1Hr1G018540.17;HORVU7Hr1G074250.1;HORVU7Hr1G074230.1	HORVU1Hr1G017120.3;HORVU3Hr1G041820.4;HORVU5Hr1G078180.5;HORVU4Hr1G008590.1;HORVU3Hr1G089260.8;HORVU1Hr1G094240.1	HORVU1Hr1G015560.2	75
HORVU1Hr1G019770.3	HORVU6Hr1G011020.1;HORVU1Hr1G070700.2;HORVU1Hr1G029090.2;HORVU5Hr1G079130.1;HORVU1Hr1G071210.4;HORVU7Hr1G043300.1;HORVU4Hr1G063260.2;HORVU3Hr1G023460.1;HORVU6Hr1G011510.1;HORVU2Hr1G106590.1;HORVU1Hr1G071190.2;HORVU5Hr1G087870.1;HORVU6Hr1G013530.1;HORVU1Hr1G052030.2;HORVU2Hr1G097990.1;HORVU1Hr1G071780.44;HORVU4Hr1G023200.1;HORVU5Hr1G087830.1;HORVU1Hr1G090300.47;HORVU2Hr1G099490.1;HORVU5Hr1G086620.…	HORVU1Hr1G015590.1	76
HORVU1Hr1G020390.1	HORVU1Hr1G018540.17;HORVU7Hr1G074250.1;HORVU7Hr1G074230.1;HORVU1Hr1G087240.4	HORVU1Hr1G016480.3	77
HORVU1Hr1G021120.1	HORVU1Hr1G019630.1	HORVU1Hr1G016660.1	78
HORVU1Hr1G021140.1;HORVU7Hr1G036850.2;HORVU1Hr1G021160.5	HORVU1Hr1G020400.19	HORVU1Hr1G016770.1	79
HORVU1Hr1G021150.2	HORVU1Hr1G021070.1;HORVU7Hr1G047740.1;HORVU1Hr1G061170.1;HORVU6Hr1G014270.1;HORVU3Hr1G109620.3	HORVU1Hr1G016820.2	80
HORVU7Hr1G087600.2;HORVU1Hr1G022310.3;HORVU7Hr1G087310.1;HORVU6Hr1G027060.2;HORVU5Hr1G115230.1	HORVU1Hr1G021140.1	HORVU1Hr1G017170.1	81
HORVU1Hr1G023660.1;HORVU7Hr1G103170.9;HORVU2Hr1G104410.26;HORVU3Hr1G014150.2;HORVU6Hr1G016150.3;HORVU6Hr1G014960.1;HORVU6Hr1G026200.5;HORVU6Hr1G020140.6;HORVU6Hr1G014970.1;HORVU0Hr1G038500.2;HORVU5Hr1G019600.6;HORVU1Hr1G087690.8;HORVU7Hr1G103160.4;HORVU6Hr1G026260.1;HORVU7Hr1G103550.4;HORVU2Hr1G104440.1;HORVU7Hr1G102840.1;HORVU5Hr1G019590.12;HORVU6Hr1G021700.4;HORVU7Hr1G109650.2;HORVU4Hr1G065100.…	HORVU1Hr1G022020.1	HORVU1Hr1G017570.5	82
HORVU1Hr1G023730.1;HORVU3Hr1G040420.15;HORVU4Hr1G002170.5	HORVU3Hr1G044550.3;HORVU1Hr1G022370.3	HORVU1Hr1G018060.2	83
HORVU1Hr1G023750.1;HORVU0Hr1G037830.1;HORVU3Hr1G038290.1;HORVU2Hr1G116220.1	HORVU1Hr1G023660.1;HORVU7Hr1G103170.9;HORVU2Hr1G104410.26;HORVU3Hr1G014150.2;HORVU6Hr1G016150.3;HORVU6Hr1G014960.1;HORVU6Hr1G026200.5;HORVU6Hr1G020140.6;HORVU6Hr1G014970.1;HORVU0Hr1G038500.2;HORVU5Hr1G019600.6;HORVU1Hr1G087690.8;HORVU7Hr1G103160.4;HORVU6Hr1G026260.1;HORVU7Hr1G103550.4;HORVU2Hr1G104440.1;HORVU7Hr1G102840.1;HORVU5Hr1G019590.12;HORVU6Hr1G021700.4;HORVU7Hr1G109650.2;HORVU4Hr1G065100.…	HORVU1Hr1G018140.5	84
HORVU1Hr1G024710.2;HORVU4Hr1G016190.4	HORVU1Hr1G023750.1;HORVU0Hr1G037830.1	HORVU1Hr1G018710.2	85
HORVU1Hr1G025020.4	HORVU1Hr1G024060.3;HORVU1Hr1G009950.7	HORVU1Hr1G019600.8	86
HORVU1Hr1G025060.7	HORVU1Hr1G024710.2	HORVU1Hr1G020140.1	87
HORVU3Hr1G115130.1;HORVU2Hr1G086590.1;HORVU1Hr1G037960.1;HORVU1Hr1G025100.1	HORVU3Hr1G115130.1;HORVU2Hr1G086590.1;HORVU1Hr1G025100.1;HORVU1Hr1G037960.1	HORVU1Hr1G021130.2;HORVU2Hr1G049240.1	88
HORVU4Hr1G050950.1;HORVU1Hr1G027600.1	HORVU1Hr1G027620.2	HORVU1Hr1G021180.1	89
HORVU1Hr1G028330.1	HORVU3Hr1G026060.1;HORVU1Hr1G028820.1;HORVU0Hr1G003140.1;HORVU2Hr1G029090.3;HORVU7Hr1G044560.1;HORVU2Hr1G042010.2;HORVU2Hr1G041980.1;HORVU1Hr1G032650.1;HORVU7Hr1G090490.1;HORVU7Hr1G062960.1	HORVU1Hr1G021690.1	90
HORVU3Hr1G026060.1;HORVU1Hr1G028820.1;HORVU0Hr1G003140.1;HORVU2Hr1G029090.3;HORVU7Hr1G044560.1;HORVU2Hr1G042010.2;HORVU2Hr1G041980.1;HORVU7Hr1G090490.1;HORVU1Hr1G032650.1;HORVU7Hr1G062960.1	HORVU1Hr1G031250.3	HORVU1Hr1G021700.1	91
HORVU1Hr1G034980.3	HORVU1Hr1G031310.10	HORVU1Hr1G021720.1	92
HORVU1Hr1G035130.1	HORVU1Hr1G036640.15	HORVU1Hr1G021780.1	93
HORVU1Hr1G035390.1	HORVU1Hr1G040560.18	HORVU1Hr1G021840.1	94
HORVU1Hr1G038240.1	HORVU1Hr1G042810.1	HORVU1Hr1G022570.1	95
HORVU1Hr1G038700.15	HORVU1Hr1G043220.1	HORVU1Hr1G022750.2	96
HORVU1Hr1G039790.5	HORVU1Hr1G043940.3;HORVU5Hr1G048520.1;HORVU1Hr1G043900.7	HORVU1Hr1G022810.1	97
HORVU1Hr1G040420.4	HORVU1Hr1G044350.16	HORVU1Hr1G022990.1	98
HORVU1Hr1G040670.5;HORVU2Hr1G070850.2;HORVU1Hr1G080070.1	HORVU1Hr1G046020.1;HORVU6Hr1G060630.1	HORVU1Hr1G023060.5	99
HORVU1Hr1G042130.1;HORVU5Hr1G049130.2;HORVU2Hr1G122960.1;HORVU7Hr1G038840.1	HORVU1Hr1G047440.5	HORVU1Hr1G023260.1	100
HORVU1Hr1G042550.1	HORVU1Hr1G048620.1;HORVU6Hr1G027500.11	HORVU1Hr1G023480.6	101
HORVU1Hr1G043250.1	HORVU1Hr1G049190.1	HORVU1Hr1G023630.1	102
HORVU1Hr1G043380.1	HORVU1Hr1G049260.4	HORVU1Hr1G024170.2;HORVU3Hr1G025780.1	103
HORVU1Hr1G043680.7	HORVU1Hr1G049430.2	HORVU1Hr1G024240.1	104
HORVU1Hr1G043940.3	HORVU1Hr1G050340.8	HORVU1Hr1G026840.3	105
HORVU1Hr1G044200.2	HORVU1Hr1G050580.7	HORVU1Hr1G027420.5	106
HORVU1Hr1G044820.4	HORVU1Hr1G050760.1	HORVU1Hr1G027490.3	107
HORVU1Hr1G046020.1	HORVU1Hr1G050920.8	HORVU1Hr1G028030.13	108
HORVU1Hr1G047440.5;HORVU5Hr1G000180.1	HORVU1Hr1G051470.3;HORVU5Hr1G102720.7	HORVU1Hr1G028190.1	109
HORVU1Hr1G048350.1	HORVU1Hr1G051570.3	HORVU1Hr1G028200.1	110
HORVU1Hr1G049210.1;HORVU1Hr1G049190.1	HORVU1Hr1G052470.2	HORVU1Hr1G028720.7	111
HORVU1Hr1G049520.3;HORVU1Hr1G049510.1	HORVU1Hr1G052620.1	HORVU1Hr1G029770.15	112
HORVU1Hr1G049690.1	HORVU1Hr1G052860.5	HORVU1Hr1G029850.1	113
HORVU1Hr1G049960.7	HORVU1Hr1G052880.1	HORVU1Hr1G029870.1	114
HORVU5Hr1G027730.2;HORVU1Hr1G050920.8	HORVU1Hr1G053070.1	HORVU1Hr1G030030.2	115
HORVU1Hr1G051210.14	HORVU1Hr1G053320.10;HORVU4Hr1G087100.6	HORVU1Hr1G030790.1	116
HORVU1Hr1G051610.3	HORVU1Hr1G053340.2	HORVU1Hr1G031600.1;HORVU7Hr1G085110.1	117
HORVU1Hr1G052000.1	HORVU1Hr1G054200.1	HORVU1Hr1G032060.4	118
HORVU1Hr1G052470.2;HORVU4Hr1G081170.1	HORVU1Hr1G054430.1	HORVU1Hr1G033270.2	119
HORVU1Hr1G053070.1;HORVU0Hr1G002480.1;HORVU2Hr1G022160.1	HORVU1Hr1G055520.3	HORVU5Hr1G033540.1;HORVU5Hr1G051010.2;HORVU5Hr1G050990.1;HORVU5Hr1G038630.1;HORVU1Hr1G035720.5	120
HORVU1Hr1G053900.4	HORVU1Hr1G056530.1;HORVU1Hr1G058500.1;HORVU1Hr1G058440.4;HORVU1Hr1G066130.1;HORVU1Hr1G072190.4;HORVU1Hr1G078530.3;HORVU4Hr1G009040.2;HORVU7Hr1G110090.1;HORVU7Hr1G110310.1;HORVU3Hr1G013680.1;HORVU4Hr1G070240.1;HORVU0Hr1G006420.1;HORVU1Hr1G078480.6;HORVU2Hr1G077630.1;HORVU4Hr1G073130.1;HORVU5Hr1G094500.1;HORVU6Hr1G087190.1;HORVU3Hr1G013530.1;HORVU7Hr1G110170.1;HORVU6Hr1G005950.2;HORVU7Hr1G110190.1;…	HORVU1Hr1G036200.1;HORVU5Hr1G094820.2	121
HORVU1Hr1G054210.1	HORVU1Hr1G057110.4	HORVU1Hr1G037270.1	122
HORVU4Hr1G033650.9;HORVU2Hr1G095070.1;HORVU1Hr1G054470.4;HORVU5Hr1G065680.2;HORVU6Hr1G065360.4;HORVU7Hr1G003860.2	HORVU1Hr1G057530.2;HORVU5Hr1G109380.2	HORVU1Hr1G037340.1	123
HORVU1Hr1G056100.2	HORVU1Hr1G057630.5;HORVU2Hr1G060390.2	HORVU1Hr1G037570.1;HORVU2Hr1G025290.1	124
HORVU1Hr1G056340.2	HORVU1Hr1G058000.10;HORVU6Hr1G010680.1	HORVU1Hr1G038060.9	125
HORVU1Hr1G056530.1;HORVU1Hr1G058500.1;HORVU1Hr1G058440.4;HORVU1Hr1G066130.1;HORVU6Hr1G015760.1;HORVU2Hr1G077630.1;HORVU1Hr1G078530.3;HORVU1Hr1G078480.6;HORVU7Hr1G110310.1;HORVU1Hr1G072190.4;HORVU7Hr1G110090.1;HORVU3Hr1G013680.1;HORVU4Hr1G070240.1;HORVU3Hr1G013530.1;HORVU7Hr1G110170.1;HORVU1Hr1G091370.1;HORVU1Hr1G049920.1;HORVU7Hr1G110190.1;HORVU0Hr1G006420.1;HORVU3Hr1G034060.1;HORVU6Hr1G015790.1;…	HORVU2Hr1G019180.3;HORVU1Hr1G058810.5;HORVU4Hr1G058500.2;HORVU3Hr1G039170.1;HORVU3Hr1G100380.2	HORVU1Hr1G038270.1	126
HORVU1Hr1G057180.2	HORVU1Hr1G059810.2	HORVU1Hr1G038330.1	127
HORVU1Hr1G057290.1	HORVU1Hr1G060250.1;HORVU3Hr1G088000.1;HORVU1Hr1G070480.1	HORVU1Hr1G038680.8	128
HORVU1Hr1G057660.1	HORVU1Hr1G062030.1;HORVU3Hr1G064470.3;HORVU7Hr1G113270.8;HORVU2Hr1G126740.3	HORVU1Hr1G038890.1	129
HORVU1Hr1G058020.2	HORVU1Hr1G062470.1;HORVU2Hr1G085780.12;HORVU6Hr1G055750.6;REV__HORVU3Hr1G028410.1	HORVU1Hr1G039050.13;HORVU4Hr1G083960.3	130
HORVU1Hr1G058290.1	HORVU1Hr1G062940.2;HORVU5Hr1G031600.1;HORVU4Hr1G042480.1	HORVU6Hr1G090170.1;HORVU1Hr1G039160.1;HORVU4Hr1G083840.1	131
HORVU1Hr1G058810.5;HORVU2Hr1G019180.3;HORVU3Hr1G100380.2;HORVU5Hr1G086540.1;HORVU5Hr1G050860.1;HORVU4Hr1G058500.2;HORVU3Hr1G005220.1;HORVU3Hr1G005250.1;HORVU3Hr1G039170.1;HORVU7Hr1G095040.1;HORVU6Hr1G048020.2;HORVU1Hr1G089610.1;HORVU7Hr1G023270.2;HORVU2Hr1G026700.1	HORVU1Hr1G063450.1;HORVU1Hr1G063380.1	HORVU1Hr1G039260.2	132
HORVU1Hr1G059350.1	HORVU1Hr1G063700.2	HORVU1Hr1G039870.1	133
HORVU1Hr1G060250.1	HORVU1Hr1G063940.1	HORVU1Hr1G040980.1	134
HORVU1Hr1G062030.1;HORVU3Hr1G064470.3;HORVU2Hr1G126740.3	HORVU1Hr1G064250.4;HORVU3Hr1G090540.1	HORVU1Hr1G041250.5	135
HORVU1Hr1G062470.1;HORVU6Hr1G055750.6;HORVU2Hr1G085780.12	HORVU1Hr1G064480.1	HORVU1Hr1G041910.1	136
HORVU1Hr1G063940.1;HORVU2Hr1G127560.1;HORVU2Hr1G127630.1;HORVU3Hr1G090840.1	HORVU1Hr1G064700.2	HORVU1Hr1G042050.17	137
HORVU1Hr1G064480.1;HORVU5Hr1G009840.1	HORVU1Hr1G064780.1	HORVU1Hr1G042220.1	138
HORVU1Hr1G066530.2	HORVU1Hr1G064860.1	HORVU1Hr1G042270.1;HORVU4Hr1G090110.5	139
HORVU1Hr1G066600.1;HORVU1Hr1G066540.1;HORVU1Hr1G066550.1;HORVU1Hr1G066610.4	HORVU1Hr1G065080.1	HORVU1Hr1G042520.2	140
HORVU1Hr1G067370.3	HORVU1Hr1G066530.2;HORVU1Hr1G066420.1	HORVU1Hr1G043660.1	141
HORVU1Hr1G069000.1	HORVU1Hr1G066600.1;HORVU1Hr1G066540.1;HORVU1Hr1G066550.1;HORVU1Hr1G066610.4;HORVU1Hr1G066580.1	HORVU1Hr1G043820.4	142
HORVU1Hr1G070210.2	HORVU1Hr1G067240.3	HORVU1Hr1G043830.1	143
HORVU1Hr1G070230.1	HORVU1Hr1G068870.1	HORVU1Hr1G043910.1	144
HORVU1Hr1G070360.1	HORVU1Hr1G070310.6	HORVU1Hr1G043920.1	145
HORVU1Hr1G070610.1	HORVU2Hr1G082370.3;HORVU1Hr1G070710.1	HORVU1Hr1G044000.1	146
HORVU1Hr1G070710.1;HORVU2Hr1G082370.3	HORVU1Hr1G071590.1;HORVU1Hr1G071710.17	HORVU1Hr1G044170.1	147
HORVU1Hr1G072070.4;HORVU3Hr1G086830.6	HORVU1Hr1G071620.6;HORVU3Hr1G087390.1	HORVU1Hr1G045610.5	148
HORVU1Hr1G072110.1	HORVU1Hr1G071810.1	HORVU1Hr1G045630.2;HORVU6Hr1G060500.1	149
HORVU1Hr1G072490.2	HORVU1Hr1G072070.4;HORVU3Hr1G086830.6;HORVU2Hr1G064310.1	HORVU1Hr1G045720.1	150
HORVU2Hr1G073270.6;HORVU2Hr1G069910.6;HORVU1Hr1G072680.2	HORVU1Hr1G072490.2;HORVU3Hr1G086170.5	HORVU1Hr1G046990.10	151
HORVU1Hr1G072780.1	HORVU1Hr1G072680.2;HORVU2Hr1G073270.6;HORVU2Hr1G069910.6	HORVU1Hr1G047180.4	152
HORVU1Hr1G073280.1;HORVU2Hr1G107600.6;HORVU2Hr1G107630.3	HORVU1Hr1G072780.1;HORVU3Hr1G085760.5	HORVU1Hr1G047300.13	153
HORVU1Hr1G073670.1;HORVU1Hr1G074340.1	HORVU3Hr1G073200.7;HORVU1Hr1G072910.3;HORVU5Hr1G085510.1;HORVU3Hr1G085680.2	HORVU1Hr1G047680.2	154
HORVU1Hr1G074110.1	HORVU1Hr1G073230.1;HORVU3Hr1G085210.2	HORVU1Hr1G047990.3	155
HORVU1Hr1G074200.1;HORVU7Hr1G117360.8;HORVU5Hr1G123470.1	HORVU1Hr1G073280.1;HORVU2Hr1G107630.3	HORVU1Hr1G048390.1	156
HORVU1Hr1G074460.2	HORVU1Hr1G074340.1;HORVU1Hr1G073670.1;HORVU6Hr1G031580.1;HORVU1Hr1G058490.4;HORVU7Hr1G025330.1;HORVU7Hr1G025200.1;HORVU7Hr1G029190.1;HORVU7Hr1G034470.1;HORVU1Hr1G022400.1;HORVU7Hr1G100380.1;HORVU7Hr1G100450.1;HORVU2Hr1G074240.4;HORVU4Hr1G067970.1;HORVU7Hr1G032270.1;HORVU6Hr1G029190.1;HORVU6Hr1G029200.1;HORVU2Hr1G090210.1;HORVU7Hr1G012820.2;HORVU4Hr1G073150.1;HORVU7Hr1G046350.1;HORVU2Hr1G079550.1;…	HORVU1Hr1G048510.4	157
HORVU1Hr1G076460.3	HORVU1Hr1G074460.2;HORVU3Hr1G082280.1	HORVU1Hr1G048760.3	158
HORVU1Hr1G076670.2	HORVU1Hr1G074820.1;HORVU3Hr1G083760.1;HORVU7Hr1G109710.1	HORVU1Hr1G049090.2;HORVU1Hr1G049070.1	159
HORVU1Hr1G077070.1;HORVU7Hr1G015690.1;HORVU2Hr1G036440.8;HORVU4Hr1G078830.1;HORVU6Hr1G001950.1	HORVU1Hr1G075150.5	HORVU1Hr1G049120.1	160
HORVU3Hr1G064950.11;HORVU1Hr1G078340.3	HORVU1Hr1G076120.1	HORVU1Hr1G049270.2	161
HORVU3Hr1G066020.1;HORVU1Hr1G079050.3	HORVU1Hr1G077070.1;HORVU7Hr1G015690.1;HORVU6Hr1G001950.1	HORVU1Hr1G049280.1	162
HORVU1Hr1G080060.1;HORVU7Hr1G111180.1	HORVU1Hr1G077420.1	HORVU1Hr1G049320.22	163
HORVU1Hr1G080640.1	HORVU1Hr1G078490.3	HORVU1Hr1G049500.1	164
HORVU1Hr1G081030.1;HORVU2Hr1G124110.1	HORVU1Hr1G078910.9;HORVU3Hr1G052700.1	HORVU1Hr1G050040.4	165
HORVU7Hr1G039550.2;HORVU7Hr1G039570.1;HORVU1Hr1G081270.1;HORVU7Hr1G039590.1;HORVU7Hr1G039560.1;HORVU7Hr1G039580.1;HORVU7Hr1G045600.1;HORVU5Hr1G012910.5;HORVU5Hr1G012920.1;HORVU2Hr1G064420.2;HORVU4Hr1G050680.1;HORVU2Hr1G127650.2;HORVU2Hr1G127480.1	HORVU1Hr1G079050.3;HORVU3Hr1G066020.1	HORVU1Hr1G050110.1	166
HORVU1Hr1G081540.1	HORVU1Hr1G079900.2	HORVU1Hr1G050740.2	167
HORVU1Hr1G082250.2;HORVU4Hr1G016770.9;HORVU4Hr1G016780.3	HORVU1Hr1G080060.1;HORVU7Hr1G111180.1;HORVU1Hr1G078730.1	HORVU1Hr1G050880.1	168
HORVU1Hr1G083960.3;HORVU2Hr1G022140.3;HORVU2Hr1G022110.2	HORVU1Hr1G080070.1;HORVU1Hr1G040670.5;HORVU2Hr1G070850.2	HORVU1Hr1G051280.1	169
HORVU1Hr1G084160.1	HORVU1Hr1G080360.1	HORVU1Hr1G052040.1	170
HORVU1Hr1G084370.2	HORVU1Hr1G080910.5;HORVU3Hr1G090710.9;HORVU6Hr1G044030.8	HORVU1Hr1G052060.4	171
HORVU1Hr1G084700.5;HORVU4Hr1G006800.2	HORVU7Hr1G039590.1;HORVU7Hr1G039550.2;HORVU7Hr1G039570.1;HORVU7Hr1G039580.1;HORVU1Hr1G081270.1;HORVU7Hr1G045600.1;HORVU7Hr1G039560.1;HORVU5Hr1G012910.5;HORVU5Hr1G012920.1	HORVU1Hr1G052260.3	172
HORVU1Hr1G086460.1;HORVU1Hr1G086690.1;HORVU1Hr1G086610.1;HORVU1Hr1G086480.1;HORVU3Hr1G061790.1	HORVU1Hr1G081310.4	HORVU1Hr1G052430.6	173
HORVU1Hr1G087320.2	HORVU1Hr1G082250.2;HORVU4Hr1G016770.9	HORVU1Hr1G052930.1	174
HORVU1Hr1G088040.2;HORVU3Hr1G060800.1;HORVU3Hr1G072120.4	HORVU1Hr1G084390.2	HORVU1Hr1G053440.2	175
HORVU1Hr1G088110.1	HORVU1Hr1G084880.1;HORVU6Hr1G037700.1	HORVU1Hr1G053740.1	176
HORVU1Hr1G088140.1;HORVU2Hr1G008440.3	HORVU1Hr1G085660.1	HORVU1Hr1G053840.2	177
HORVU1Hr1G089280.1	HORVU1Hr1G085730.2	HORVU1Hr1G054040.1	178
HORVU1Hr1G089310.1;HORVU5Hr1G107180.1;HORVU2Hr1G017950.1	HORVU1Hr1G086460.1;HORVU5Hr1G055360.2;HORVU1Hr1G086690.1;HORVU1Hr1G086610.1;HORVU1Hr1G086480.1;HORVU3Hr1G061790.1	HORVU1Hr1G054380.3	179
HORVU1Hr1G092110.4;HORVU5Hr1G048100.4	HORVU1Hr1G088040.2;HORVU3Hr1G060800.1	HORVU1Hr1G054560.1	180
HORVU1Hr1G092240.6	HORVU1Hr1G088110.1;HORVU1Hr1G002820.2;HORVU7Hr1G033260.1;HORVU4Hr1G077220.4;HORVU6Hr1G082670.1;HORVU7Hr1G077200.6	HORVU1Hr1G055440.1	181
HORVU1Hr1G095060.2;HORVU5Hr1G052990.2	HORVU1Hr1G088140.1	HORVU1Hr1G055480.1	182
HORVU2Hr1G002230.4	HORVU1Hr1G088460.1;HORVU3Hr1G086950.1;HORVU7Hr1G052030.3	HORVU1Hr1G055860.2	183
HORVU2Hr1G002480.5;HORVU2Hr1G002410.2	HORVU1Hr1G089280.1;HORVU3Hr1G060080.1	HORVU5Hr1G103720.2;HORVU1Hr1G055970.27	184
HORVU2Hr1G003110.1;HORVU7Hr1G022250.5	HORVU1Hr1G090610.1	HORVU1Hr1G057170.11	185
HORVU2Hr1G005670.1;HORVU7Hr1G100850.1;HORVU7Hr1G100810.1;HORVU3Hr1G093370.1;HORVU7Hr1G118760.1;HORVU5Hr1G125410.2;HORVU4Hr1G000490.1;HORVU4Hr1G089410.1;HORVU2Hr1G005570.1;HORVU7Hr1G019530.1	HORVU1Hr1G090870.2	HORVU1Hr1G057330.21	186
HORVU5Hr1G011280.24;HORVU2Hr1G005650.6	HORVU1Hr1G091230.12;HORVU6Hr1G031440.2;HORVU5Hr1G093370.3;HORVU5Hr1G094510.2;HORVU2Hr1G087930.2;HORVU7Hr1G068410.1;HORVU7Hr1G109640.2;HORVU3Hr1G057440.1;HORVU7Hr1G078170.32	HORVU1Hr1G057570.4	187
HORVU2Hr1G005660.1	HORVU1Hr1G091570.1	HORVU1Hr1G057680.1;HORVU7Hr1G120450.1	188
HORVU2Hr1G006030.1	HORVU1Hr1G091820.2	HORVU1Hr1G057970.2	189
HORVU2Hr1G006280.15	HORVU1Hr1G092110.4;HORVU1Hr1G084370.2	HORVU1Hr1G059860.2	190
HORVU2Hr1G006320.1	HORVU1Hr1G092150.1	HORVU1Hr1G059960.2	191
HORVU2Hr1G006330.1	HORVU1Hr1G092440.3	HORVU1Hr1G059970.2	192
HORVU2Hr1G006470.15	HORVU1Hr1G094060.2	HORVU1Hr1G060180.2	193
HORVU2Hr1G007840.7	HORVU1Hr1G094180.2	HORVU1Hr1G060380.1;HORVU1Hr1G060330.1	194
HORVU2Hr1G008980.10	HORVU1Hr1G094740.1	HORVU1Hr1G061160.6	195
HORVU2Hr1G010010.1	HORVU2Hr1G003110.1	HORVU1Hr1G061380.1	196
HORVU2Hr1G010100.2	HORVU2Hr1G004530.2;HORVU2Hr1G004510.2;HORVU2Hr1G004500.1;HORVU2Hr1G004440.1	HORVU1Hr1G061960.1	197
HORVU2Hr1G010440.5;HORVU3Hr1G105880.6	HORVU2Hr1G005170.1	HORVU1Hr1G062080.5	198
HORVU2Hr1G010690.15;HORVU2Hr1G010630.1;HORVU2Hr1G010670.1	HORVU2Hr1G005650.6;HORVU5Hr1G011280.24	HORVU1Hr1G062110.1	199
HORVU2Hr1G012400.1;HORVU2Hr1G009160.5;HORVU2Hr1G009560.1	HORVU2Hr1G006180.27	HORVU1Hr1G062530.2	200
HORVU2Hr1G012690.1;HORVU4Hr1G082240.5;HORVU5Hr1G056950.2;HORVU1Hr1G038810.3	HORVU2Hr1G006280.15;HORVU2Hr1G006320.1	HORVU1Hr1G062650.1;HORVU3Hr1G087490.1	201
HORVU5Hr1G077930.1;HORVU4Hr1G085560.2;HORVU6Hr1G076690.1;HORVU5Hr1G018360.1;HORVU2Hr1G088060.1;HORVU2Hr1G012900.1;HORVU3Hr1G007420.1	HORVU2Hr1G006530.1	HORVU1Hr1G062900.2	202
HORVU2Hr1G013540.3;HORVU3Hr1G041870.1	HORVU2Hr1G007570.1	HORVU1Hr1G063300.1	203
HORVU2Hr1G014770.1	HORVU2Hr1G007990.1	HORVU1Hr1G064210.2	204
HORVU2Hr1G017440.3;HORVU2Hr1G017450.11	HORVU2Hr1G008440.3;HORVU3Hr1G095780.3	HORVU1Hr1G064490.13;HORVU2Hr1G104740.2;HORVU7Hr1G075170.1	205
HORVU2Hr1G019250.1	HORVU2Hr1G010100.2;HORVU5Hr1G051710.1	HORVU1Hr1G064630.6	206
HORVU2Hr1G019780.2	HORVU2Hr1G010440.5	HORVU1Hr1G065150.1	207
HORVU2Hr1G021540.3;HORVU2Hr1G021530.1;HORVU1Hr1G085930.1	HORVU2Hr1G012240.1;HORVU2Hr1G012100.2	HORVU1Hr1G065630.1	208
HORVU2Hr1G021830.1	HORVU2Hr1G012130.1	HORVU1Hr1G065960.8	209
HORVU2Hr1G022180.2	HORVU2Hr1G012400.1	HORVU1Hr1G066100.1	210
HORVU2Hr1G023120.1	HORVU2Hr1G012690.1;HORVU4Hr1G082240.5;HORVU5Hr1G056950.2;HORVU5Hr1G062410.6;HORVU1Hr1G038810.3	HORVU1Hr1G066240.1	211
HORVU2Hr1G023450.1;HORVU2Hr1G023430.1;HORVU2Hr1G023420.7	HORVU2Hr1G013900.17	HORVU1Hr1G067230.1	212
HORVU2Hr1G023590.7;HORVU4Hr1G039640.1;HORVU3Hr1G000590.4;HORVU4Hr1G006530.2;HORVU0Hr1G031760.1	HORVU2Hr1G014130.4	HORVU1Hr1G067300.2	213
HORVU2Hr1G024900.5	HORVU2Hr1G014770.1;HORVU5Hr1G027940.22;HORVU1Hr1G091080.1	HORVU1Hr1G067980.1;HORVU1Hr1G067870.2	214
HORVU2Hr1G025150.1	HORVU2Hr1G016040.2	HORVU1Hr1G067910.1	215
HORVU2Hr1G025660.1	HORVU2Hr1G016330.1	HORVU1Hr1G068530.2	216
HORVU2Hr1G025780.1	HORVU2Hr1G017440.3	HORVU1Hr1G069100.5	217
HORVU2Hr1G026590.2;HORVU2Hr1G026570.1;HORVU2Hr1G026540.1;HORVU2Hr1G026520.2	HORVU2Hr1G019120.5	HORVU1Hr1G070110.1	218
HORVU2Hr1G026640.1;HORVU6Hr1G087070.2;HORVU6Hr1G087120.1;HORVU3Hr1G074950.3;HORVU2Hr1G026450.3	HORVU2Hr1G019160.1;HORVU7Hr1G080630.1	HORVU1Hr1G070220.8	219
HORVU2Hr1G026750.9	HORVU2Hr1G019570.1;HORVU2Hr1G076990.1	HORVU5Hr1G112390.1;HORVU5Hr1G066080.1;HORVU1Hr1G071570.1;HORVU3Hr1G087380.1;HORVU6Hr1G043260.1	220
HORVU2Hr1G026790.1;HORVU6Hr1G087050.1	HORVU2Hr1G020900.5	HORVU1Hr1G072060.1;HORVU3Hr1G086930.1	221
HORVU2Hr1G026920.1;HORVU2Hr1G026900.2;HORVU2Hr1G026890.1	HORVU2Hr1G021270.1;HORVU3Hr1G019700.1;HORVU3Hr1G019680.1	HORVU1Hr1G072200.2;HORVU3Hr1G086540.2	222
HORVU2Hr1G026970.2	HORVU2Hr1G021540.3;HORVU2Hr1G021530.1;HORVU2Hr1G021150.3;HORVU1Hr1G085930.1	HORVU1Hr1G072220.4;HORVU4Hr1G059210.1;HORVU4Hr1G059180.2	223
HORVU2Hr1G027270.2	HORVU2Hr1G021830.1;HORVU4Hr1G076420.2	HORVU1Hr1G072250.1;HORVU7Hr1G084920.2	224
HORVU2Hr1G028580.1	HORVU2Hr1G022140.3;HORVU1Hr1G083960.3;HORVU2Hr1G022110.2;HORVU2Hr1G022120.1	HORVU5Hr1G009600.1;HORVU1Hr1G072270.1;HORVU3Hr1G086410.2;HORVU5Hr1G009610.2	225
HORVU2Hr1G028660.3;HORVU2Hr1G028720.4	HORVU2Hr1G022250.4	HORVU1Hr1G073640.1	226
HORVU2Hr1G028670.1	HORVU2Hr1G022310.4	HORVU3Hr1G084520.1;HORVU1Hr1G073660.3	227
HORVU2Hr1G029350.2;HORVU3Hr1G026180.16	HORVU2Hr1G022820.1	HORVU1Hr1G073840.1	228
HORVU2Hr1G029990.6	HORVU2Hr1G023450.1	HORVU1Hr1G074330.14	229
HORVU2Hr1G031010.1	HORVU2Hr1G024650.1	HORVU1Hr1G074350.1	230
HORVU2Hr1G033090.1	HORVU6Hr1G028870.1;HORVU5Hr1G046070.1;HORVU2Hr1G025630.5	HORVU1Hr1G074590.3	231
HORVU2Hr1G033130.1	HORVU2Hr1G025800.2	HORVU1Hr1G075110.4;HORVU6Hr1G058900.2	232
HORVU2Hr1G085960.1;HORVU2Hr1G033250.3;HORVU7Hr1G032110.3	HORVU3Hr1G066310.1;HORVU2Hr1G025810.1	HORVU1Hr1G075530.1	233
HORVU2Hr1G034740.5;HORVU3Hr1G019700.1;HORVU3Hr1G019680.1	HORVU2Hr1G026640.1;HORVU6Hr1G087070.2;HORVU6Hr1G087120.1;HORVU2Hr1G026590.2;HORVU2Hr1G026570.1;HORVU2Hr1G026540.1;HORVU2Hr1G026520.2;HORVU2Hr1G026450.3	HORVU1Hr1G075540.3	234
HORVU2Hr1G035400.1;HORVU1Hr1G057880.3;HORVU3Hr1G104360.3	HORVU2Hr1G026750.9;HORVU3Hr1G032730.1	HORVU1Hr1G075550.1	235
HORVU2Hr1G035730.2	HORVU2Hr1G026790.1	HORVU1Hr1G075560.1	236
HORVU2Hr1G036050.1	HORVU2Hr1G026840.1	HORVU1Hr1G075680.2	237
HORVU2Hr1G036680.2	HORVU2Hr1G027370.1;HORVU2Hr1G027400.5	HORVU1Hr1G075760.2;HORVU1Hr1G075780.4	238
HORVU2Hr1G036950.1	HORVU2Hr1G027860.1	HORVU1Hr1G076180.1	239
HORVU2Hr1G036980.6;HORVU5Hr1G048630.3	HORVU2Hr1G028190.2	HORVU1Hr1G076420.1	240
HORVU2Hr1G037770.2	HORVU2Hr1G028580.1;HORVU3Hr1G010390.1	HORVU1Hr1G076470.8	241
HORVU2Hr1G038570.2	HORVU2Hr1G028600.1;HORVU5Hr1G009120.1;HORVU5Hr1G009090.1	HORVU1Hr1G076530.1;HORVU3Hr1G030910.2	242
HORVU2Hr1G042180.2;HORVU7Hr1G001560.1	HORVU2Hr1G028670.1;HORVU2Hr1G028720.4;HORVU2Hr1G028660.3	HORVU5Hr1G018660.1;HORVU1Hr1G076610.1	243
HORVU2Hr1G042700.2;HORVU4Hr1G012870.1;HORVU2Hr1G052290.1;HORVU4Hr1G068400.2	HORVU2Hr1G028930.4	HORVU6Hr1G054240.1;HORVU1Hr1G076870.1	244
HORVU2Hr1G044220.1	HORVU2Hr1G029350.2	HORVU1Hr1G077910.2	245
HORVU2Hr1G045610.3	HORVU2Hr1G029830.2	HORVU1Hr1G078050.1	246
HORVU2Hr1G047410.5	HORVU2Hr1G029890.1	HORVU3Hr1G038360.1;HORVU1Hr1G078370.2	247
HORVU2Hr1G050230.9	HORVU2Hr1G029990.6;HORVU7Hr1G032110.3;HORVU2Hr1G033250.3;HORVU2Hr1G085960.1	HORVU1Hr1G078500.1	248
HORVU2Hr1G052650.1;HORVU5Hr1G048830.1;HORVU4Hr1G058360.1	HORVU2Hr1G030670.4	HORVU1Hr1G079070.4;HORVU3Hr1G065960.4	249
HORVU6Hr1G017250.1;HORVU2Hr1G054990.1	HORVU2Hr1G030680.4	HORVU1Hr1G079250.2	250
HORVU2Hr1G056740.1	HORVU2Hr1G031990.2	HORVU1Hr1G079370.1	251
HORVU2Hr1G057210.11	HORVU2Hr1G032170.6	HORVU1Hr1G079910.6	252
HORVU2Hr1G057350.3;HORVU2Hr1G057360.2	HORVU2Hr1G032330.6	HORVU1Hr1G080320.2	253
HORVU2Hr1G058170.4	HORVU2Hr1G032540.2	HORVU1Hr1G080370.1	254
HORVU2Hr1G058700.4;HORVU4Hr1G034950.2;HORVU2Hr1G057310.2	HORVU2Hr1G032910.2	HORVU1Hr1G080480.2	255
HORVU5Hr1G101680.2;HORVU2Hr1G060770.16	HORVU2Hr1G033520.1	HORVU1Hr1G080590.1	256
HORVU2Hr1G063250.4;HORVU6Hr1G018540.5	HORVU2Hr1G033620.1;HORVU2Hr1G036050.1	HORVU1Hr1G080980.2	257
HORVU2Hr1G063900.1	HORVU2Hr1G034380.1	HORVU1Hr1G081280.1	258
HORVU2Hr1G064100.1	HORVU2Hr1G035400.1;HORVU3Hr1G104360.3;HORVU1Hr1G057880.3	HORVU1Hr1G081470.4	259
HORVU4Hr1G027040.2;HORVU2Hr1G065120.1	HORVU2Hr1G035680.2	HORVU1Hr1G081550.1	260
HORVU2Hr1G066320.1	HORVU2Hr1G035860.1	HORVU1Hr1G081770.1	261
HORVU2Hr1G068630.1	HORVU2Hr1G036950.1;HORVU7Hr1G094160.1	HORVU1Hr1G082010.2	262
HORVU2Hr1G069600.1;HORVU2Hr1G087400.1	HORVU2Hr1G037750.1	HORVU1Hr1G082660.1	263
HORVU2Hr1G071080.1;HORVU5Hr1G031470.8;HORVU4Hr1G014120.2;HORVU6Hr1G028690.3;HORVU5Hr1G102460.1;HORVU4Hr1G008860.1;HORVU5Hr1G102390.1;HORVU7Hr1G105530.5;HORVU7Hr1G105430.1;HORVU7Hr1G105270.2;HORVU5Hr1G102440.2;HORVU3Hr1G071120.7;HORVU1Hr1G076190.4;HORVU4Hr1G090440.2	HORVU2Hr1G041130.3	HORVU3Hr1G064290.2;HORVU1Hr1G083000.1	264
HORVU2Hr1G071180.1;HORVU0Hr1G014400.1;HORVU5Hr1G124030.19	HORVU2Hr1G041780.2	HORVU1Hr1G083270.4	265
HORVU2Hr1G071380.1;HORVU3Hr1G096120.1;HORVU5Hr1G078500.1	HORVU2Hr1G042460.1;HORVU2Hr1G042480.1	HORVU1Hr1G083470.1	266
HORVU2Hr1G072010.1	HORVU2Hr1G042700.2;HORVU2Hr1G052290.1;HORVU4Hr1G012870.1;HORVU4Hr1G068400.2	HORVU1Hr1G083710.2	267
HORVU2Hr1G073040.1	HORVU2Hr1G043020.1	HORVU1Hr1G083840.2	268
HORVU2Hr1G074220.1	HORVU2Hr1G045500.1;HORVU2Hr1G045490.1	HORVU1Hr1G084970.2	269
HORVU2Hr1G074680.2	HORVU2Hr1G047230.12	HORVU1Hr1G085170.5;HORVU3Hr1G062590.1;HORVU7Hr1G081910.1	270
HORVU2Hr1G074770.3	HORVU2Hr1G052050.6;HORVU5Hr1G109160.2	HORVU1Hr1G085470.1	271
HORVU2Hr1G075280.2	HORVU2Hr1G052430.9	HORVU1Hr1G086390.2	272
HORVU2Hr1G075470.2	HORVU2Hr1G052490.1	HORVU1Hr1G086980.13	273
HORVU2Hr1G075670.1	HORVU5Hr1G048830.1;HORVU2Hr1G052650.1	HORVU1Hr1G087010.1	274
HORVU2Hr1G075870.37	HORVU2Hr1G056230.1	HORVU1Hr1G087340.3	275
HORVU2Hr1G075930.2	HORVU3Hr1G115630.1;HORVU6Hr1G095330.1;HORVU2Hr1G057350.3;HORVU2Hr1G057360.2	HORVU1Hr1G087530.2	276
HORVU2Hr1G075970.1;HORVU4Hr1G030920.1;HORVU4Hr1G030910.2;HORVU2Hr1G002010.5	HORVU2Hr1G058700.4;HORVU2Hr1G057310.2;HORVU4Hr1G034950.2	HORVU1Hr1G087570.1	277
HORVU2Hr1G076060.4	HORVU2Hr1G058720.1	HORVU1Hr1G088560.2;HORVU2Hr1G030330.1	278
HORVU2Hr1G076650.1	HORVU2Hr1G059360.2	HORVU1Hr1G088760.2	279
HORVU2Hr1G077540.1;HORVU4Hr1G086010.1;HORVU2Hr1G064590.1	HORVU2Hr1G064100.1;HORVU7Hr1G025180.1	HORVU1Hr1G089360.2;HORVU6Hr1G087820.1;HORVU3Hr1G056630.5	280
HORVU2Hr1G079550.1;HORVU7Hr1G100690.1;HORVU7Hr1G033030.1;HORVU2Hr1G079560.3;HORVU7Hr1G012820.2;HORVU6Hr1G007470.1;HORVU6Hr1G007820.1;HORVU7Hr1G046350.1;HORVU2Hr1G108980.1;HORVU3Hr1G018360.1;HORVU4Hr1G077900.2	HORVU2Hr1G064590.1	HORVU1Hr1G089380.1	281
HORVU2Hr1G080100.6;HORVU2Hr1G080060.1	HORVU2Hr1G065120.1	HORVU1Hr1G089530.4;HORVU1Hr1G089680.3	282
HORVU2Hr1G080890.1	HORVU2Hr1G066910.1	HORVU1Hr1G089830.1	283
HORVU2Hr1G081920.3	HORVU2Hr1G069600.1	HORVU1Hr1G090490.1;HORVU7Hr1G035220.1	284
HORVU2Hr1G082420.5	HORVU2Hr1G071080.1;HORVU4Hr1G014120.2;HORVU5Hr1G031470.8;HORVU5Hr1G102460.1;HORVU4Hr1G008860.1;HORVU5Hr1G102390.1;HORVU7Hr1G105530.5;HORVU7Hr1G105430.1;HORVU7Hr1G105270.2;HORVU5Hr1G102440.2;HORVU3Hr1G071120.7;HORVU1Hr1G076190.4;HORVU4Hr1G090440.2	HORVU1Hr1G090710.12	285
HORVU5Hr1G052320.6;HORVU2Hr1G084750.4	HORVU2Hr1G071180.1	HORVU1Hr1G090720.1	286
HORVU2Hr1G085950.1	HORVU2Hr1G072750.4	HORVU1Hr1G090760.1;HORVU0Hr1G030130.1	287
HORVU2Hr1G086080.1;HORVU2Hr1G085820.1;HORVU2Hr1G085870.1	HORVU2Hr1G073260.5	HORVU1Hr1G090810.1;HORVU7Hr1G018660.1;HORVU2Hr1G023490.4;HORVU3Hr1G105770.1	288
HORVU2Hr1G086170.1	HORVU2Hr1G074220.1;HORVU3Hr1G112520.2	HORVU1Hr1G091460.2	289
HORVU2Hr1G088380.1	HORVU2Hr1G074320.2	HORVU1Hr1G091730.19	290
HORVU2Hr1G089180.1	HORVU2Hr1G074680.2;HORVU6Hr1G009360.1	HORVU1Hr1G092670.3;HORVU3Hr1G020120.1	291
HORVU2Hr1G090470.1;HORVU6Hr1G059510.5	HORVU2Hr1G075010.9;HORVU5Hr1G118340.1	HORVU1Hr1G092680.1	292
HORVU2Hr1G090750.1	HORVU2Hr1G075470.2;HORVU2Hr1G125950.3;HORVU2Hr1G029900.2;HORVU1Hr1G055340.2;HORVU2Hr1G110230.24	HORVU1Hr1G092860.1	293
HORVU2Hr1G091320.5	HORVU2Hr1G075610.4	HORVU1Hr1G093480.1	294
HORVU6Hr1G060540.1;HORVU2Hr1G091360.1;HORVU1Hr1G009180.1;HORVU2Hr1G014900.4;HORVU2Hr1G014890.1;HORVU2Hr1G037200.1;HORVU2Hr1G038790.1;HORVU7Hr1G098030.1;HORVU0Hr1G022290.1;HORVU7Hr1G113560.4;HORVU2Hr1G104690.1;HORVU7Hr1G114610.2;HORVU7Hr1G019390.1;HORVU6Hr1G053090.1;HORVU5Hr1G012190.1;HORVU5Hr1G000940.1;HORVU6Hr1G084370.1;HORVU2Hr1G104610.2;HORVU3Hr1G059850.1;HORVU4Hr1G016880.2;HORVU7Hr1G008140.1;…	HORVU2Hr1G075970.1;HORVU6Hr1G093940.4;HORVU2Hr1G002010.5;HORVU4Hr1G030920.1;HORVU6Hr1G076260.1;HORVU4Hr1G030910.2	HORVU3Hr1G044700.1;HORVU2Hr1G063720.1;HORVU1Hr1G093720.5	295
HORVU2Hr1G092260.46	HORVU2Hr1G077080.3;HORVU3Hr1G023220.7	HORVU1Hr1G094100.1	296
HORVU2Hr1G092430.1	HORVU2Hr1G077540.1;HORVU4Hr1G086010.1	HORVU1Hr1G094530.1	297
HORVU2Hr1G092840.1	HORVU2Hr1G077990.2	HORVU1Hr1G094800.2	298
HORVU2Hr1G092960.1	HORVU2Hr1G078350.3	HORVU1Hr1G095100.1	299
HORVU2Hr1G094370.1	HORVU2Hr1G079300.2	HORVU1Hr1G095140.1	300
HORVU6Hr1G064140.2;HORVU2Hr1G096360.13	HORVU2Hr1G080100.6;HORVU5Hr1G006030.1	HORVU2Hr1G000280.3;HORVU2Hr1G000260.1;HORVU2Hr1G074630.2	301
HORVU2Hr1G099770.6	HORVU2Hr1G080820.2	HORVU2Hr1G000450.1	302
HORVU2Hr1G100970.4;HORVU3Hr1G096950.1;HORVU6Hr1G079960.1;HORVU0Hr1G038360.1	HORVU2Hr1G081970.1	HORVU2Hr1G001290.1	303
HORVU2Hr1G101140.3	HORVU2Hr1G082420.5;HORVU6Hr1G053060.9	HORVU2Hr1G001350.2;HORVU4Hr1G072290.1;HORVU3Hr1G096490.2	304
HORVU6Hr1G068150.2;HORVU2Hr1G101980.1	HORVU2Hr1G083530.1	HORVU2Hr1G001600.1;HORVU2Hr1G086290.1	305
HORVU2Hr1G102330.2	HORVU2Hr1G083860.1;HORVU0Hr1G004970.2	HORVU2Hr1G001900.5	306
HORVU2Hr1G103000.8;HORVU2Hr1G102950.1	HORVU2Hr1G085060.2;HORVU5Hr1G078470.2;HORVU6Hr1G055260.4;HORVU7Hr1G056040.5	HORVU2Hr1G002600.1	307
HORVU2Hr1G103180.4;HORVU2Hr1G060010.4;HORVU0Hr1G013900.4	HORVU2Hr1G085280.3	HORVU2Hr1G004230.5;HORVU7Hr1G036060.3;HORVU7Hr1G036070.3	308
HORVU2Hr1G104450.6	HORVU2Hr1G085800.3	HORVU2Hr1G004550.1	309
HORVU2Hr1G106130.1;HORVU2Hr1G106210.1	HORVU2Hr1G086080.1;HORVU2Hr1G085870.1	HORVU2Hr1G004650.1;HORVU2Hr1G004640.2;HORVU2Hr1G004610.1;HORVU2Hr1G004600.1	310
HORVU2Hr1G108990.1	HORVU2Hr1G085950.1;HORVU2Hr1G067670.1;HORVU2Hr1G085920.1;HORVU6Hr1G012000.1	HORVU2Hr1G005320.3	311
HORVU2Hr1G109080.7;HORVU2Hr1G118820.2	HORVU2Hr1G086710.1	HORVU2Hr1G005590.1;HORVU2Hr1G005520.1	312
HORVU2Hr1G109380.3;HORVU4Hr1G017090.1;HORVU2Hr1G085580.2;HORVU6Hr1G075860.1	HORVU2Hr1G086830.1;HORVU2Hr1G086840.1	HORVU2Hr1G006010.1	313
HORVU7Hr1G090790.3;HORVU2Hr1G109760.1	HORVU2Hr1G087400.1	HORVU2Hr1G006250.1	314
HORVU2Hr1G111640.2;HORVU5Hr1G000780.2;HORVU4Hr1G004820.8;HORVU1Hr1G063560.6;HORVU4Hr1G077430.3;HORVU0Hr1G009560.4;HORVU7Hr1G052560.1;HORVU5Hr1G075050.6	HORVU2Hr1G088940.4;HORVU1Hr1G010010.2	HORVU2Hr1G009640.1;HORVU2Hr1G009150.1	315
HORVU2Hr1G112000.1;HORVU1Hr1G008160.3;HORVU3Hr1G113750.1;HORVU3Hr1G054660.1;HORVU2Hr1G067660.1;HORVU2Hr1G056160.2;HORVU7Hr1G078010.2;HORVU6Hr1G058050.3;HORVU6Hr1G023630.1;HORVU0Hr1G018470.1;HORVU4Hr1G047410.2;HORVU0Hr1G025410.1;HORVU4Hr1G048730.1	HORVU2Hr1G091440.1;HORVU2Hr1G091400.4	HORVU2Hr1G009540.1;HORVU2Hr1G009610.1	316
HORVU2Hr1G112260.9;HORVU2Hr1G040900.1	HORVU2Hr1G091680.1	HORVU2Hr1G009940.3	317
HORVU2Hr1G113180.3;HORVU7Hr1G111190.2;HORVU1Hr1G056180.2	HORVU2Hr1G091910.6	HORVU2Hr1G010560.1	318
HORVU2Hr1G115640.11	HORVU2Hr1G092840.1;HORVU6Hr1G061460.3	HORVU2Hr1G010870.8;HORVU2Hr1G010890.2	319
HORVU2Hr1G115670.1	HORVU2Hr1G094290.3	HORVU2Hr1G010990.2	320
HORVU2Hr1G116630.2;HORVU2Hr1G116620.1;HORVU2Hr1G116600.1;HORVU2Hr1G116570.1	HORVU2Hr1G094400.5;HORVU2Hr1G094390.5	HORVU2Hr1G011030.1	321
HORVU2Hr1G118670.1	HORVU2Hr1G095220.3	HORVU2Hr1G012440.2	322
HORVU2Hr1G121320.1	HORVU2Hr1G096360.13;HORVU6Hr1G064140.2	HORVU2Hr1G012860.1	323
HORVU2Hr1G122260.1	HORVU2Hr1G096380.2	HORVU2Hr1G013170.1	324
HORVU2Hr1G122280.1	HORVU2Hr1G097730.3;HORVU2Hr1G097720.4;HORVU0Hr1G006460.1	HORVU2Hr1G013500.1;HORVU4Hr1G057140.3;HORVU1Hr1G048860.1	325
HORVU2Hr1G122950.1;HORVU4Hr1G066430.12;HORVU5Hr1G098510.2;HORVU1Hr1G024000.2	HORVU4Hr1G086920.1;HORVU2Hr1G102720.2;HORVU6Hr1G067980.1;HORVU3Hr1G088850.12;HORVU3Hr1G010830.2;HORVU6Hr1G067830.4;HORVU3Hr1G010570.2;HORVU4Hr1G064820.1;HORVU4Hr1G088890.2;HORVU2Hr1G098120.1;HORVU6Hr1G067740.3;HORVU4Hr1G064870.23;HORVU6Hr1G010780.3	HORVU2Hr1G014000.1;HORVU3Hr1G067470.1;HORVU2Hr1G087740.1;HORVU2Hr1G014060.1;HORVU3Hr1G037270.2;HORVU1Hr1G079960.1;HORVU0Hr1G020500.1;HORVU4Hr1G054820.9	326
HORVU2Hr1G123220.1	HORVU2Hr1G099770.6;HORVU6Hr1G054420.7	HORVU2Hr1G014440.2	327
HORVU2Hr1G123370.1	HORVU2Hr1G100100.2	HORVU2Hr1G014580.1	328
HORVU2Hr1G123770.1	HORVU2Hr1G100660.2;HORVU7Hr1G061070.4;HORVU2Hr1G100700.2	HORVU2Hr1G016000.6;HORVU1Hr1G055380.1	329
HORVU2Hr1G124400.1;HORVU7Hr1G066450.1	HORVU2Hr1G100970.4;HORVU3Hr1G096950.1;HORVU7Hr1G120140.1;HORVU6Hr1G079960.1;HORVU0Hr1G038360.1	HORVU2Hr1G016840.2	330
HORVU2Hr1G124650.3;HORVU3Hr1G116580.4;HORVU3Hr1G116650.3;HORVU6Hr1G068760.5;HORVU1Hr1G005920.4	HORVU2Hr1G101190.8	HORVU2Hr1G017120.1	331
HORVU2Hr1G124850.1	HORVU2Hr1G101980.1	HORVU2Hr1G017420.2	332
HORVU2Hr1G124930.1;HORVU3Hr1G111970.1	HORVU2Hr1G102610.1;HORVU6Hr1G067870.1	HORVU2Hr1G017880.4	333
HORVU2Hr1G125820.1	HORVU2Hr1G103000.8	HORVU2Hr1G018480.1;HORVU2Hr1G044340.1;HORVU2Hr1G018570.1;HORVU2Hr1G044360.1;HORVU2Hr1G018440.1	334
HORVU2Hr1G125950.3;HORVU1Hr1G055340.2;HORVU2Hr1G110230.24;HORVU5Hr1G097630.1;HORVU1Hr1G074670.8;HORVU2Hr1G029900.2	HORVU2Hr1G103180.4;HORVU0Hr1G013900.4;HORVU2Hr1G060010.4	HORVU2Hr1G018520.1	335
HORVU2Hr1G126690.4	HORVU2Hr1G103520.7	HORVU2Hr1G018700.1	336
HORVU2Hr1G127220.1;HORVU3Hr1G090970.2	HORVU2Hr1G104110.1	HORVU2Hr1G018720.7	337
HORVU2Hr1G127740.1	HORVU2Hr1G106080.2	HORVU2Hr1G018820.1;HORVU2Hr1G018840.4	338
HORVU3Hr1G000880.1	HORVU2Hr1G107600.6	HORVU2Hr1G019190.1	339
HORVU3Hr1G001250.3	HORVU2Hr1G108010.5	HORVU2Hr1G019580.1;HORVU2Hr1G019400.1	340
HORVU3Hr1G003050.1;HORVU3Hr1G112860.1	HORVU2Hr1G109080.7;HORVU2Hr1G109200.4	HORVU2Hr1G019500.2	341
HORVU3Hr1G003850.2	HORVU2Hr1G109380.3;HORVU2Hr1G085580.2;HORVU1Hr1G010110.1	HORVU2Hr1G020270.2	342
HORVU3Hr1G006050.1;HORVU3Hr1G006060.1	HORVU2Hr1G109640.1	HORVU2Hr1G020690.6;HORVU4Hr1G041810.13	343
HORVU3Hr1G006180.2	HORVU2Hr1G109850.1	HORVU5Hr1G023010.1;HORVU2Hr1G021070.1	344
HORVU3Hr1G007980.2	HORVU2Hr1G109990.2	HORVU2Hr1G021500.1	345
HORVU3Hr1G010320.1	HORVU2Hr1G111640.2;HORVU5Hr1G000780.2;HORVU4Hr1G004820.8;HORVU7Hr1G114340.1;HORVU1Hr1G063560.6;HORVU4Hr1G077430.3;HORVU0Hr1G009560.4	HORVU2Hr1G021700.2	346
HORVU5Hr1G010880.2;HORVU3Hr1G011990.4;HORVU7Hr1G091800.1	HORVU2Hr1G111840.5	HORVU2Hr1G021810.1	347
HORVU3Hr1G012160.1;HORVU3Hr1G012120.1;HORVU3Hr1G012030.1	HORVU2Hr1G112120.5	HORVU2Hr1G022090.4	348
HORVU3Hr1G012970.1;HORVU3Hr1G013060.1	HORVU2Hr1G112260.9;HORVU2Hr1G040900.1;HORVU5Hr1G088920.4	HORVU2Hr1G022920.11	349
HORVU3Hr1G014850.1	HORVU4Hr1G084510.2;HORVU4Hr1G087720.2;HORVU2Hr1G113120.1;HORVU7Hr1G066130.2;HORVU5Hr1G022360.3;HORVU3Hr1G117890.7;HORVU0Hr1G001070.1;HORVU1Hr1G069400.2;HORVU1Hr1G059300.2;HORVU4Hr1G050700.3;HORVU2Hr1G038950.5;HORVU4Hr1G029350.13;HORVU6Hr1G080640.1;HORVU5Hr1G001800.2;HORVU3Hr1G007590.6;HORVU3Hr1G006830.32;HORVU6Hr1G078810.22;HORVU3Hr1G093140.3;HORVU3Hr1G007540.9;HORVU7Hr1G073300.5;HORVU1Hr1G083220…	HORVU2Hr1G023350.3	350
HORVU3Hr1G015590.2;HORVU2Hr1G070450.21;HORVU5Hr1G076170.6	HORVU2Hr1G113180.3;HORVU1Hr1G056180.2;HORVU7Hr1G111190.2	HORVU2Hr1G023750.2	351
HORVU3Hr1G015640.4;HORVU3Hr1G015680.1	HORVU2Hr1G113460.1	HORVU2Hr1G024280.2;HORVU2Hr1G018510.1;HORVU2Hr1G024300.1	352
HORVU3Hr1G017020.13;HORVU4Hr1G051120.4;HORVU2Hr1G100620.5;HORVU7Hr1G081590.1	HORVU2Hr1G114110.2	HORVU2Hr1G024570.1	353
HORVU3Hr1G017580.1	HORVU2Hr1G114340.4;HORVU2Hr1G091460.2	HORVU2Hr1G025530.1	354
HORVU3Hr1G017730.1	HORVU2Hr1G115640.11;HORVU2Hr1G115670.1	HORVU2Hr1G025930.2	355
HORVU3Hr1G018460.1;HORVU3Hr1G019090.8	HORVU2Hr1G118320.7	HORVU2Hr1G026060.1	356
HORVU3Hr1G018530.3;HORVU3Hr1G108750.2	HORVU2Hr1G118910.2;HORVU2Hr1G118790.15	HORVU2Hr1G026220.5	357
HORVU3Hr1G018940.1	HORVU2Hr1G119240.1	HORVU2Hr1G026340.3	358
HORVU3Hr1G022660.1	HORVU2Hr1G119780.1	HORVU2Hr1G026420.2	359
HORVU3Hr1G023260.1	HORVU2Hr1G119980.1;HORVU2Hr1G119960.1	HORVU2Hr1G026810.1	360
HORVU3Hr1G024530.5;HORVU1Hr1G025370.3	HORVU2Hr1G122470.1	HORVU2Hr1G027640.4	361
HORVU3Hr1G024890.2;HORVU3Hr1G024820.2	HORVU2Hr1G122590.1	HORVU2Hr1G028230.14	362
HORVU3Hr1G026500.6	HORVU2Hr1G122950.1;HORVU4Hr1G066430.12;HORVU1Hr1G024000.2;HORVU5Hr1G098510.2	HORVU2Hr1G028430.1	363
HORVU3Hr1G027730.3	HORVU2Hr1G124050.25	HORVU2Hr1G028510.1	364
HORVU3Hr1G027790.3	HORVU2Hr1G124400.1;HORVU7Hr1G066450.1;HORVU3Hr1G069300.5;HORVU3Hr1G000570.3	HORVU2Hr1G028760.1;HORVU2Hr1G028780.3	365
HORVU3Hr1G029150.1;HORVU5Hr1G066150.2;HORVU1Hr1G001570.1	HORVU2Hr1G124490.1	HORVU2Hr1G029480.1	366
HORVU3Hr1G030350.1	HORVU2Hr1G124650.3;HORVU6Hr1G068760.5;HORVU1Hr1G005920.4	HORVU2Hr1G029560.1	367
HORVU3Hr1G030620.2	HORVU2Hr1G124930.1;HORVU3Hr1G111970.1;HORVU3Hr1G112350.1	HORVU2Hr1G029600.3	368
HORVU3Hr1G030980.2;HORVU4Hr1G012460.1;HORVU5Hr1G073730.1	HORVU2Hr1G125820.1;HORVU3Hr1G057840.46	HORVU2Hr1G029870.4;HORVU1Hr1G055370.1;HORVU0Hr1G000490.1	369
HORVU3Hr1G031710.1	HORVU2Hr1G127090.4	HORVU2Hr1G030220.1;HORVU2Hr1G030230.1	370
HORVU3Hr1G032480.1	HORVU2Hr1G127560.1;HORVU2Hr1G127630.1;HORVU3Hr1G090840.1	HORVU2Hr1G030820.1	371
HORVU3Hr1G032730.1	HORVU3Hr1G002280.1	HORVU2Hr1G030840.1	372
HORVU3Hr1G033370.3	HORVU3Hr1G003040.4	HORVU2Hr1G030870.1	373
HORVU3Hr1G033920.18	HORVU3Hr1G003050.1	HORVU2Hr1G030880.1	374
HORVU3Hr1G034820.7;HORVU0Hr1G008870.3;HORVU5Hr1G051820.2;HORVU7Hr1G058160.4;HORVU0Hr1G010220.1	HORVU3Hr1G003150.1	HORVU2Hr1G031450.6	375
HORVU3Hr1G035170.2;HORVU0Hr1G008690.1;HORVU7Hr1G066930.5;HORVU6Hr1G002130.4;HORVU5Hr1G114130.1	HORVU3Hr1G003540.2	HORVU2Hr1G031890.2	376
HORVU3Hr1G035650.1	HORVU3Hr1G003850.2;HORVU3Hr1G003870.1	HORVU2Hr1G031910.3;HORVU6Hr1G033570.2	377
HORVU3Hr1G036790.1;HORVU3Hr1G036820.1;HORVU3Hr1G036880.4	HORVU3Hr1G006060.1;HORVU3Hr1G006050.1	HORVU2Hr1G032570.2	378
HORVU3Hr1G037280.7	HORVU3Hr1G007190.1	HORVU2Hr1G032830.1	379
HORVU3Hr1G038460.1	HORVU3Hr1G007420.1;HORVU5Hr1G077930.1;HORVU4Hr1G085560.2;HORVU6Hr1G076690.1;HORVU5Hr1G018360.1;HORVU2Hr1G088060.1;HORVU2Hr1G012900.1	HORVU2Hr1G032970.4	380
HORVU3Hr1G040270.4;HORVU3Hr1G040350.1;HORVU3Hr1G040280.1;HORVU3Hr1G111730.1	HORVU3Hr1G010780.1;HORVU3Hr1G010800.11	HORVU2Hr1G033040.1	381
HORVU3Hr1G048090.1;HORVU3Hr1G010780.1;HORVU3Hr1G010800.11	HORVU3Hr1G011660.5	HORVU2Hr1G033100.1	382
HORVU3Hr1G048560.1	HORVU3Hr1G012950.2	HORVU2Hr1G033970.2	383
HORVU3Hr1G049070.10	HORVU3Hr1G015590.2;HORVU2Hr1G070450.21	HORVU2Hr1G034400.4	384
HORVU3Hr1G049910.1;HORVU1Hr1G094900.6	HORVU3Hr1G015640.4	HORVU2Hr1G034580.1	385
HORVU3Hr1G049920.1	HORVU3Hr1G015810.1	HORVU2Hr1G034660.2	386
HORVU3Hr1G050010.11	HORVU3Hr1G016850.1;HORVU3Hr1G016820.3;HORVU3Hr1G016800.1;HORVU3Hr1G016830.1	HORVU2Hr1G035650.7	387
HORVU3Hr1G050740.1;HORVU6Hr1G095230.3;HORVU6Hr1G012690.3	HORVU3Hr1G017020.13;HORVU4Hr1G051120.4;HORVU7Hr1G065130.1;HORVU7Hr1G043150.1;HORVU2Hr1G100620.5;HORVU3Hr1G080650.6;HORVU5Hr1G097010.3;HORVU1Hr1G005720.7;HORVU4Hr1G058220.1;HORVU5Hr1G096860.2;HORVU3Hr1G080330.51;HORVU3Hr1G086590.1;HORVU3Hr1G024950.8	HORVU2Hr1G035830.4;HORVU2Hr1G035810.3	388
HORVU3Hr1G050760.1	HORVU3Hr1G017300.2	HORVU2Hr1G036390.1;HORVU3Hr1G068660.2;HORVU3Hr1G068630.1	389
HORVU3Hr1G052370.1	HORVU3Hr1G017410.18	HORVU2Hr1G036800.3	390
HORVU3Hr1G053990.1;HORVU4Hr1G063360.3;HORVU6Hr1G070140.1;HORVU6Hr1G070150.1;HORVU7Hr1G093450.2;HORVU7Hr1G036920.2;HORVU3Hr1G110370.2;HORVU6Hr1G078060.1;HORVU6Hr1G070170.1;HORVU2Hr1G116230.1	HORVU3Hr1G017630.2	HORVU2Hr1G036840.1	391
HORVU3Hr1G055730.3;HORVU1Hr1G092710.1	HORVU3Hr1G018170.3	HORVU2Hr1G037470.1	392
HORVU3Hr1G055870.2	HORVU3Hr1G018530.3;HORVU3Hr1G108750.2;HORVU1Hr1G013980.1;HORVU3Hr1G108760.1	HORVU2Hr1G037550.1;HORVU2Hr1G037570.3;HORVU2Hr1G037560.2	393
HORVU3Hr1G059060.2	HORVU3Hr1G020960.1	HORVU2Hr1G038720.6	394
HORVU3Hr1G059320.2	HORVU3Hr1G022020.4	HORVU2Hr1G038740.1	395
HORVU3Hr1G059480.1	HORVU3Hr1G023810.25	HORVU2Hr1G038990.1	396
HORVU3Hr1G060080.1	HORVU3Hr1G023960.1	HORVU2Hr1G040020.4	397
HORVU7Hr1G089350.2;HORVU3Hr1G060360.1;HORVU5Hr1G093180.2;HORVU6Hr1G016300.1	HORVU3Hr1G024530.5;HORVU1Hr1G025370.3;HORVU0Hr1G009480.6;HORVU1Hr1G082950.2	HORVU2Hr1G040570.2;HORVU0Hr1G005720.2	398
HORVU3Hr1G072910.1;HORVU3Hr1G061800.2	HORVU3Hr1G024990.3	HORVU2Hr1G041760.1;HORVU2Hr1G041770.2	399
HORVU3Hr1G066800.6	HORVU3Hr1G026010.5	HORVU2Hr1G042280.3	400
HORVU3Hr1G067290.1;HORVU5Hr1G075600.1;HORVU5Hr1G034090.1;HORVU4Hr1G083900.1;HORVU3Hr1G020270.1	HORVU3Hr1G027540.1	HORVU2Hr1G043220.1	401
HORVU3Hr1G068600.2;HORVU3Hr1G068570.1	HORVU3Hr1G027610.12	HORVU2Hr1G043680.1	402
HORVU3Hr1G069750.2	HORVU3Hr1G029150.1;HORVU5Hr1G066150.2	HORVU2Hr1G043860.1;HORVU6Hr1G092390.1;HORVU6Hr1G092280.1;HORVU4Hr1G008800.1;HORVU5Hr1G026650.2;HORVU7Hr1G112470.1	403
HORVU3Hr1G070960.2	HORVU3Hr1G029160.3	HORVU2Hr1G043890.5	404
HORVU3Hr1G071520.2	HORVU3Hr1G030750.3	HORVU2Hr1G043900.1	405
HORVU3Hr1G071740.1	HORVU3Hr1G030980.2;HORVU4Hr1G012460.1;HORVU5Hr1G073730.1;HORVU5Hr1G073750.1	HORVU2Hr1G044450.4;HORVU2Hr1G044440.1	406
HORVU3Hr1G072410.1;HORVU3Hr1G072460.1	HORVU3Hr1G031380.1	HORVU2Hr1G044460.2	407
HORVU3Hr1G105170.1;HORVU3Hr1G073140.1;HORVU3Hr1G105180.1;HORVU3Hr1G073120.1;HORVU6Hr1G055090.1;HORVU3Hr1G001920.2;HORVU1Hr1G054240.2;HORVU3Hr1G105520.1;HORVU5Hr1G019100.1;HORVU1Hr1G054200.1;HORVU4Hr1G088080.4	HORVU3Hr1G033410.4	HORVU5Hr1G081590.1;HORVU5Hr1G101600.1;HORVU7Hr1G104300.1;HORVU2Hr1G045920.1	408
HORVU3Hr1G074920.1;HORVU2Hr1G025740.2;HORVU2Hr1G025730.2;HORVU1Hr1G022630.1;HORVU5Hr1G104350.2;HORVU1Hr1G016980.1	HORVU3Hr1G035170.2;HORVU7Hr1G066930.5;HORVU6Hr1G036010.9	HORVU2Hr1G046380.3	409
HORVU3Hr1G074960.1	HORVU3Hr1G035400.1	HORVU2Hr1G046530.1	410
HORVU3Hr1G075210.2;HORVU3Hr1G081230.2;HORVU3Hr1G081180.2	HORVU3Hr1G036790.1;HORVU3Hr1G036820.1;HORVU2Hr1G116220.1	HORVU2Hr1G046660.6	411
HORVU3Hr1G075730.1	HORVU3Hr1G036880.4	HORVU2Hr1G048070.2	412
HORVU3Hr1G080110.5	HORVU3Hr1G037470.19	HORVU2Hr1G049700.1	413
HORVU3Hr1G080530.5	HORVU3Hr1G038290.1;HORVU6Hr1G079190.1	HORVU2Hr1G050270.1;HORVU4Hr1G078690.2	414
HORVU3Hr1G080830.1	HORVU3Hr1G038320.1	HORVU2Hr1G050450.3	415
HORVU3Hr1G083090.21;HORVU1Hr1G075000.9	HORVU3Hr1G038830.1	HORVU2Hr1G050980.2	416
HORVU3Hr1G083300.1	HORVU3Hr1G040270.4;HORVU3Hr1G111730.1	HORVU4Hr1G015940.2;HORVU4Hr1G015930.1;HORVU2Hr1G051180.1	417
HORVU3Hr1G085100.2	HORVU3Hr1G040350.1	HORVU2Hr1G051740.1	418
HORVU3Hr1G085380.5;HORVU3Hr1G085410.1	HORVU3Hr1G040710.1	HORVU2Hr1G052880.1	419
HORVU3Hr1G085420.12;HORVU6Hr1G085990.2;HORVU6Hr1G086020.55	HORVU3Hr1G044780.1	HORVU2Hr1G053290.6	420
HORVU3Hr1G085660.5	HORVU3Hr1G045680.5;HORVU3Hr1G045750.2;HORVU3Hr1G045700.1	HORVU2Hr1G055380.41	421
HORVU3Hr1G085810.1	HORVU3Hr1G046970.3	HORVU2Hr1G056360.4	422
HORVU3Hr1G089520.5	HORVU3Hr1G048090.1	HORVU2Hr1G057430.1;HORVU1Hr1G078150.1	423
HORVU3Hr1G089830.2;HORVU3Hr1G114200.1;HORVU3Hr1G041400.6	HORVU3Hr1G048560.1;HORVU3Hr1G048550.1	HORVU2Hr1G059320.1	424
HORVU3Hr1G089970.1	HORVU3Hr1G049820.1	HORVU2Hr1G059620.1	425
HORVU3Hr1G090990.3	HORVU3Hr1G050290.1	HORVU2Hr1G061040.10	426
HORVU3Hr1G091680.1;HORVU3Hr1G100410.1	HORVU3Hr1G052520.1	HORVU2Hr1G061710.11	427
HORVU3Hr1G091920.4;HORVU3Hr1G091790.1	HORVU3Hr1G053020.1	HORVU2Hr1G062400.1	428
HORVU3Hr1G092570.2	HORVU3Hr1G053760.3	HORVU2Hr1G063210.2	429
HORVU3Hr1G093050.2	HORVU3Hr1G053990.1;HORVU4Hr1G063360.3;HORVU6Hr1G070140.1;HORVU6Hr1G070150.1;HORVU7Hr1G093450.2;HORVU7Hr1G036920.2;HORVU3Hr1G110370.2;HORVU6Hr1G078060.1;HORVU6Hr1G070170.1	HORVU2Hr1G063510.2	430
HORVU3Hr1G093260.1	HORVU3Hr1G055730.3;HORVU1Hr1G092710.1;HORVU3Hr1G079040.2;HORVU1Hr1G068240.1;HORVU0Hr1G032220.1;HORVU4Hr1G026640.1;HORVU5Hr1G044550.1	HORVU2Hr1G063630.4	431
HORVU7Hr1G119330.1;HORVU3Hr1G093520.1;HORVU7Hr1G119390.1	HORVU3Hr1G055870.2;HORVU5Hr1G002000.8	HORVU2Hr1G063640.3	432
HORVU3Hr1G093530.4	HORVU3Hr1G057090.1;HORVU3Hr1G056990.2	HORVU2Hr1G063740.4	433
HORVU3Hr1G093550.9	HORVU3Hr1G059060.2;HORVU3Hr1G033920.18	HORVU2Hr1G064160.12;HORVU2Hr1G064150.1	434
HORVU3Hr1G093960.1	HORVU3Hr1G059320.2;HORVU1Hr1G069480.1;HORVU0Hr1G025810.2;HORVU3Hr1G029880.3	HORVU2Hr1G064390.1;HORVU2Hr1G064330.1	435
HORVU3Hr1G094050.3	HORVU3Hr1G060360.1	HORVU2Hr1G066480.2	436
HORVU3Hr1G095420.3	HORVU3Hr1G061000.5	HORVU2Hr1G066620.1;HORVU6Hr1G063750.4;HORVU6Hr1G063740.1	437
HORVU3Hr1G095890.1	HORVU3Hr1G061060.2;HORVU5Hr1G073660.1;HORVU5Hr1G073680.3;HORVU1Hr1G087660.3	HORVU2Hr1G066920.6;HORVU2Hr1G082700.1;HORVU6Hr1G026790.4	438
HORVU3Hr1G096450.1	HORVU3Hr1G061800.2;HORVU3Hr1G072910.1	HORVU2Hr1G067370.5	439
HORVU3Hr1G097140.5;HORVU3Hr1G097160.2	HORVU3Hr1G062600.2	HORVU2Hr1G068120.2	440
HORVU3Hr1G098720.3	HORVU3Hr1G062870.1	HORVU2Hr1G068270.2	441
HORVU3Hr1G100060.1	HORVU3Hr1G063050.8	HORVU2Hr1G068360.8	442
HORVU3Hr1G100370.1;HORVU3Hr1G100320.1	HORVU3Hr1G063220.1	HORVU2Hr1G068670.2	443
HORVU3Hr1G104770.5	HORVU3Hr1G063840.1	HORVU2Hr1G069060.2	444
HORVU3Hr1G104940.5	HORVU3Hr1G066800.6;HORVU3Hr1G049480.9;HORVU1Hr1G094920.5	HORVU2Hr1G069590.2	445
HORVU3Hr1G105630.7	HORVU4Hr1G083900.1;HORVU4Hr1G036900.1;HORVU3Hr1G067290.1	HORVU2Hr1G070000.3	446
HORVU3Hr1G106140.3;HORVU3Hr1G105600.1;HORVU7Hr1G051310.1;HORVU3Hr1G105290.1;HORVU3Hr1G105420.2	HORVU3Hr1G067910.3	HORVU2Hr1G070090.3	447
HORVU3Hr1G107170.1	HORVU3Hr1G068600.2;HORVU3Hr1G068570.1;HORVU3Hr1G070850.1	HORVU2Hr1G071350.1	448
HORVU3Hr1G108500.3	HORVU3Hr1G068700.3	HORVU2Hr1G071880.2	449
HORVU3Hr1G108720.3;HORVU1Hr1G013980.1	HORVU3Hr1G069190.1	HORVU2Hr1G072220.7	450
HORVU3Hr1G112450.1	HORVU3Hr1G069890.5;HORVU3Hr1G069720.6	HORVU2Hr1G072660.2;HORVU2Hr1G072650.1	451
HORVU3Hr1G112600.2	HORVU3Hr1G069750.2;HORVU3Hr1G069760.1;HORVU1Hr1G092650.2	HORVU2Hr1G072830.1	452
HORVU3Hr1G113340.1	HORVU3Hr1G069970.5	HORVU2Hr1G073320.1	453
HORVU3Hr1G113670.1	HORVU3Hr1G069980.3	HORVU2Hr1G073680.3	454
HORVU3Hr1G113820.3;HORVU4Hr1G058980.1;HORVU1Hr1G082350.4	HORVU3Hr1G070900.9	HORVU2Hr1G073760.2	455
HORVU3Hr1G113850.2;HORVU7Hr1G110830.1	HORVU3Hr1G071490.2	HORVU2Hr1G076790.4	456
HORVU3Hr1G113950.3	HORVU3Hr1G071550.3;HORVU2Hr1G026020.1;HORVU7Hr1G088920.3;HORVU5Hr1G068100.1;HORVU7Hr1G056820.1;HORVU5Hr1G080840.1;HORVU5Hr1G105770.2;HORVU5Hr1G123770.1;HORVU2Hr1G040680.2	HORVU2Hr1G076910.2	457
HORVU3Hr1G114170.3	HORVU3Hr1G071820.1	HORVU2Hr1G077220.21	458
HORVU3Hr1G115580.5	HORVU3Hr1G072230.3	HORVU2Hr1G079240.1;HORVU2Hr1G079200.1	459
HORVU3Hr1G115880.4	HORVU3Hr1G072410.1	HORVU2Hr1G079480.2	460
HORVU3Hr1G116450.2;HORVU3Hr1G116490.1;HORVU3Hr1G116470.1;HORVU3Hr1G116480.1	HORVU3Hr1G072520.1	HORVU2Hr1G079780.3	461
HORVU3Hr1G116550.5;HORVU1Hr1G005870.1;HORVU5Hr1G109460.1;HORVU7Hr1G117230.1	HORVU3Hr1G074480.3	HORVU2Hr1G079840.1	462
HORVU3Hr1G117600.1;HORVU3Hr1G117630.1;HORVU3Hr1G117550.1	HORVU3Hr1G074920.1;HORVU2Hr1G025740.2;HORVU2Hr1G025730.2	HORVU2Hr1G079960.4	463
HORVU3Hr1G117660.2;HORVU3Hr1G117590.2;HORVU3Hr1G117570.4	HORVU3Hr1G074960.1;HORVU1Hr1G022630.1;HORVU5Hr1G104350.2;HORVU7Hr1G108220.1	HORVU2Hr1G080140.3	464
HORVU3Hr1G117760.4;HORVU5Hr1G019270.4	HORVU3Hr1G076220.1	HORVU2Hr1G080340.1	465
HORVU4Hr1G000290.4	HORVU3Hr1G076520.1	HORVU2Hr1G080630.1;HORVU0Hr1G004990.1	466
HORVU4Hr1G000940.2	HORVU3Hr1G077960.1;HORVU2Hr1G045250.4	HORVU2Hr1G080710.1;HORVU6Hr1G047300.2	467
HORVU4Hr1G002050.4	HORVU3Hr1G078650.1	HORVU2Hr1G080970.1	468
HORVU4Hr1G003090.2	HORVU3Hr1G079500.2	HORVU2Hr1G081080.2	469
HORVU4Hr1G003460.2	HORVU3Hr1G079620.5	HORVU2Hr1G081890.1	470
HORVU4Hr1G003990.3	HORVU4Hr1G047270.1;HORVU3Hr1G080430.1;HORVU3Hr1G080440.1	HORVU2Hr1G082440.7	471
HORVU4Hr1G006330.1	HORVU3Hr1G080530.5;HORVU4Hr1G051010.4	HORVU2Hr1G082540.6;HORVU7Hr1G066320.3	472
HORVU4Hr1G007120.2	HORVU3Hr1G080820.2	HORVU2Hr1G082800.1	473
HORVU4Hr1G008700.1;HORVU4Hr1G064790.6	HORVU3Hr1G080830.1;HORVU2Hr1G121320.1;HORVU2Hr1G116670.1;HORVU7Hr1G017950.2	HORVU2Hr1G082860.3	474
HORVU6Hr1G087190.1;HORVU4Hr1G009040.2;HORVU5Hr1G094500.1	HORVU3Hr1G083090.21	HORVU2Hr1G083170.2	475
HORVU4Hr1G010030.27	HORVU3Hr1G083190.3	HORVU2Hr1G083610.1;HORVU7Hr1G108810.7	476
HORVU4Hr1G010300.10	HORVU3Hr1G084740.1	HORVU2Hr1G083940.2	477
HORVU4Hr1G011450.1	HORVU3Hr1G085380.5;HORVU3Hr1G085410.1;HORVU3Hr1G085390.1;HORVU5Hr1G096390.5	HORVU2Hr1G084500.2	478
HORVU4Hr1G011750.1	HORVU3Hr1G085420.12;HORVU6Hr1G086020.55;HORVU6Hr1G085990.2	HORVU2Hr1G084680.6	479
HORVU4Hr1G011940.9;HORVU0Hr1G026430.2;HORVU3Hr1G050870.6	HORVU3Hr1G085500.1	HORVU2Hr1G085120.1	480
HORVU4Hr1G014540.1;HORVU4Hr1G014520.1	HORVU3Hr1G086050.2	HORVU2Hr1G085270.2	481
HORVU4Hr1G014720.1	HORVU3Hr1G087360.2	HORVU2Hr1G085340.2	482
HORVU4Hr1G014740.3;HORVU5Hr1G068810.2	HORVU3Hr1G088020.2	HORVU2Hr1G085650.1	483
HORVU5Hr1G029110.1;HORVU4Hr1G014800.1	HORVU3Hr1G088630.16	HORVU2Hr1G085880.1;HORVU6Hr1G041460.1;HORVU1Hr1G058590.1	484
HORVU4Hr1G017450.1;HORVU5Hr1G037200.2	HORVU3Hr1G088970.1	HORVU2Hr1G086240.1;HORVU6Hr1G023180.1	485
HORVU4Hr1G019140.5	HORVU3Hr1G089000.2	HORVU2Hr1G086360.3	486
HORVU4Hr1G020160.1	HORVU3Hr1G089520.5;HORVU3Hr1G000590.4	HORVU2Hr1G086390.1	487
HORVU4Hr1G021190.1	HORVU3Hr1G089830.2;HORVU3Hr1G114200.1;HORVU3Hr1G041400.6;HORVU4Hr1G059630.1	HORVU2Hr1G087370.1;HORVU0Hr1G018590.1	488
HORVU4Hr1G021320.2;HORVU5Hr1G122040.1;HORVU5Hr1G121910.1;HORVU5Hr1G122060.2	HORVU3Hr1G089950.1	HORVU2Hr1G087390.3	489
HORVU4Hr1G022260.1	HORVU3Hr1G090970.2;HORVU2Hr1G127220.1	HORVU2Hr1G087970.4	490
HORVU4Hr1G022420.1	HORVU3Hr1G091680.1	HORVU2Hr1G088050.3;HORVU2Hr1G114920.1	491
HORVU4Hr1G025670.1	HORVU3Hr1G092520.2	HORVU2Hr1G089940.1;HORVU2Hr1G089820.6	492
HORVU4Hr1G027410.11;HORVU4Hr1G009160.1;HORVU4Hr1G009170.1	HORVU3Hr1G092610.1;HORVU3Hr1G092600.1	HORVU2Hr1G089950.3	493
HORVU4Hr1G038850.4;HORVU4Hr1G029030.22	HORVU3Hr1G093050.2;HORVU7Hr1G041110.1	HORVU2Hr1G089970.3	494
HORVU4Hr1G031280.1	HORVU3Hr1G093290.1	HORVU2Hr1G091130.1;HORVU2Hr1G091200.3	495
HORVU4Hr1G035380.1	HORVU3Hr1G094050.3;HORVU5Hr1G039730.1;HORVU5Hr1G123110.1	HORVU2Hr1G091270.4	496
HORVU4Hr1G035700.1;HORVU6Hr1G022380.3	HORVU3Hr1G095450.1	HORVU2Hr1G091380.1	497
HORVU4Hr1G037030.4	HORVU3Hr1G097140.5	HORVU2Hr1G092060.1	498
HORVU4Hr1G039440.2	HORVU3Hr1G097210.1	HORVU2Hr1G092190.1	499
HORVU4Hr1G039650.3	HORVU3Hr1G097770.1	HORVU2Hr1G092600.4	500
HORVU4Hr1G043120.8	HORVU3Hr1G099730.1	HORVU2Hr1G093030.1	501
HORVU4Hr1G045760.1	HORVU3Hr1G100410.1	HORVU2Hr1G093140.1	502
HORVU4Hr1G045860.1	HORVU3Hr1G101930.10	HORVU2Hr1G094420.1;HORVU2Hr1G113410.2;HORVU2Hr1G113450.2	503
HORVU4Hr1G047940.6	HORVU3Hr1G102890.1	HORVU2Hr1G094650.1	504
HORVU4Hr1G050710.6	HORVU3Hr1G104290.2	HORVU2Hr1G094740.4	505
HORVU4Hr1G050990.2	HORVU3Hr1G104350.1	HORVU2Hr1G096760.1	506
HORVU4Hr1G051010.4	HORVU3Hr1G105290.1	HORVU2Hr1G097200.1	507
HORVU4Hr1G051320.3	HORVU3Hr1G106140.3;HORVU3Hr1G105600.1	HORVU2Hr1G098860.2	508
HORVU4Hr1G052170.7	HORVU3Hr1G108720.3	HORVU2Hr1G098880.1	509
HORVU4Hr1G052610.2	HORVU3Hr1G110870.4	HORVU2Hr1G099220.5;HORVU6Hr1G084480.3	510
HORVU4Hr1G055060.1;HORVU3Hr1G095530.3;HORVU5Hr1G027940.22;HORVU1Hr1G091080.1	HORVU3Hr1G112370.1	HORVU2Hr1G099230.8;HORVU6Hr1G056610.7	511
HORVU4Hr1G055350.19	HORVU3Hr1G113670.1;HORVU4Hr1G002050.4	HORVU2Hr1G099850.18	512
HORVU4Hr1G056000.12	HORVU3Hr1G113820.3;HORVU1Hr1G082350.4;HORVU4Hr1G058980.1	HORVU2Hr1G100310.1;HORVU1Hr1G081810.1	513
HORVU4Hr1G056050.1;HORVU3Hr1G018650.4;HORVU2Hr1G012660.1;HORVU2Hr1G014390.3;HORVU2Hr1G012650.1	HORVU3Hr1G113850.2	HORVU2Hr1G101360.7	514
HORVU4Hr1G056610.3	HORVU3Hr1G116450.2;HORVU3Hr1G116470.1;HORVU3Hr1G116490.1;HORVU3Hr1G116480.1	HORVU2Hr1G101460.2	515
HORVU4Hr1G056740.5;HORVU5Hr1G100200.3;HORVU5Hr1G100700.3;HORVU4Hr1G056830.1;HORVU6Hr1G085370.2;HORVU6Hr1G085320.3	HORVU3Hr1G116580.4;HORVU3Hr1G116650.3	HORVU3Hr1G035840.1;HORVU2Hr1G101650.46	516
HORVU4Hr1G057910.1;HORVU4Hr1G057890.5	HORVU3Hr1G117570.4;HORVU3Hr1G117640.1;HORVU3Hr1G117650.1	HORVU2Hr1G101670.2	517
HORVU4Hr1G058940.2	HORVU3Hr1G117600.1;HORVU3Hr1G117630.1	HORVU2Hr1G102200.1	518
HORVU4Hr1G059120.2	HORVU3Hr1G117660.2;HORVU3Hr1G117590.2	HORVU2Hr1G103130.3	519
HORVU4Hr1G059170.1;HORVU2Hr1G064190.2;HORVU2Hr1G064180.3;HORVU4Hr1G076420.2	HORVU3Hr1G117760.4	HORVU2Hr1G103310.2	520
HORVU4Hr1G059570.1	HORVU3Hr1G117790.1;HORVU3Hr1G117830.2	HORVU2Hr1G103580.13	521
HORVU4Hr1G060530.1;HORVU4Hr1G060490.1;HORVU6Hr1G092760.1;HORVU6Hr1G091550.14	HORVU4Hr1G000090.6	HORVU2Hr1G103620.5	522
HORVU4Hr1G061320.1	HORVU4Hr1G002720.2	HORVU2Hr1G106380.5	523
HORVU4Hr1G061500.4	HORVU4Hr1G005450.5	HORVU2Hr1G106810.1	524
HORVU4Hr1G062880.3	HORVU4Hr1G007050.2	HORVU2Hr1G107550.1;HORVU2Hr1G107520.1	525
HORVU4Hr1G063140.1	HORVU4Hr1G007220.1	HORVU2Hr1G109120.2	526
HORVU4Hr1G064020.1	HORVU4Hr1G007560.1;HORVU0Hr1G025900.1	HORVU2Hr1G109370.1	527
HORVU4Hr1G064160.8	HORVU4Hr1G008150.1	HORVU2Hr1G109500.1	528
HORVU4Hr1G064360.1;HORVU4Hr1G064380.3	HORVU4Hr1G008180.1	HORVU2Hr1G109910.6	529
HORVU4Hr1G066300.1	HORVU4Hr1G008580.1	HORVU2Hr1G110110.1	530
HORVU4Hr1G066750.3	HORVU4Hr1G008700.1;HORVU4Hr1G064790.6;HORVU2Hr1G078560.1;HORVU3Hr1G112860.1;HORVU2Hr1G078580.8	HORVU2Hr1G110120.3;HORVU7Hr1G023890.1;HORVU1Hr1G064320.1	531
HORVU4Hr1G066830.6	HORVU4Hr1G008750.6	HORVU2Hr1G110590.1;HORVU2Hr1G110670.1	532
HORVU4Hr1G066860.5	HORVU4Hr1G009880.1	HORVU2Hr1G110680.1	533
HORVU4Hr1G067430.1	HORVU4Hr1G009900.1	HORVU2Hr1G111070.2	534
HORVU4Hr1G067480.2	HORVU4Hr1G010300.10;HORVU4Hr1G010360.3	HORVU2Hr1G111520.2	535
HORVU4Hr1G067950.8	HORVU4Hr1G011940.9	HORVU2Hr1G111600.2	536
HORVU4Hr1G068820.1	HORVU4Hr1G012630.3	HORVU2Hr1G111610.3	537
HORVU4Hr1G069100.2	HORVU4Hr1G012700.3	HORVU2Hr1G112630.2	538
HORVU4Hr1G069210.1;HORVU7Hr1G034710.2	HORVU4Hr1G013640.1	HORVU2Hr1G112830.2;HORVU2Hr1G112590.1	539
HORVU4Hr1G069480.3	HORVU4Hr1G014540.1	HORVU2Hr1G112860.1	540
HORVU4Hr1G069920.28	HORVU4Hr1G014740.3	HORVU2Hr1G114260.1	541
HORVU4Hr1G070250.3;HORVU6Hr1G006140.1;HORVU6Hr1G006130.6;HORVU6Hr1G006090.1;HORVU6Hr1G006080.2;HORVU5Hr1G110680.1;HORVU6Hr1G006120.2;HORVU7Hr1G100400.2;HORVU6Hr1G011490.2;HORVU6Hr1G011620.1;HORVU6Hr1G005960.7;HORVU6Hr1G005940.2	HORVU4Hr1G014800.1;HORVU7Hr1G056460.1;HORVU5Hr1G029110.1	HORVU2Hr1G115060.3	542
HORVU4Hr1G071960.2;HORVU1Hr1G060370.1;HORVU1Hr1G060340.2;HORVU1Hr1G049910.1;HORVU0Hr1G038060.2;HORVU0Hr1G006340.1;HORVU3Hr1G029450.1;HORVU3Hr1G029440.1;HORVU2Hr1G011690.1;HORVU6Hr1G049800.1;HORVU6Hr1G053620.1	HORVU4Hr1G017390.1	HORVU2Hr1G115360.1	543
HORVU4Hr1G072010.1	HORVU4Hr1G017450.1;HORVU5Hr1G037200.2;HORVU4Hr1G041570.2	HORVU2Hr1G116150.5	544
HORVU4Hr1G073130.1	HORVU4Hr1G018020.2	HORVU2Hr1G116190.1	545
HORVU4Hr1G074140.1	HORVU4Hr1G018260.2	HORVU2Hr1G116910.1	546
HORVU4Hr1G074680.4;HORVU5Hr1G053560.4	HORVU4Hr1G020030.1	HORVU2Hr1G117700.1;HORVU2Hr1G117770.1	547
HORVU4Hr1G075360.5;HORVU2Hr1G018550.3	HORVU4Hr1G020740.16;HORVU5Hr1G040090.9	HORVU2Hr1G117740.2	548
HORVU4Hr1G076570.6	HORVU4Hr1G020760.1	HORVU2Hr1G118550.2	549
HORVU4Hr1G077000.2	HORVU4Hr1G021560.1	HORVU2Hr1G118930.1	550
HORVU4Hr1G077060.4	HORVU4Hr1G022990.9	HORVU2Hr1G119250.3	551
HORVU4Hr1G077420.1	HORVU4Hr1G026050.3	HORVU2Hr1G119460.2	552
HORVU4Hr1G078020.1	HORVU4Hr1G026690.1	HORVU2Hr1G120150.9	553
HORVU4Hr1G078750.2	HORVU4Hr1G027040.2	HORVU2Hr1G120230.2	554
HORVU4Hr1G079020.2	HORVU4Hr1G027260.8	HORVU2Hr1G120530.1	555
HORVU4Hr1G080780.1;HORVU1Hr1G052620.1	HORVU4Hr1G027410.11;HORVU4Hr1G009170.1	HORVU2Hr1G120970.1	556
HORVU4Hr1G081220.1	HORVU4Hr1G027820.83	HORVU2Hr1G121030.6	557
HORVU4Hr1G081640.1	HORVU4Hr1G027970.1	HORVU2Hr1G121440.2	558
HORVU4Hr1G081660.1	HORVU4Hr1G028610.1	HORVU2Hr1G121990.8;HORVU5Hr1G116590.1	559
HORVU4Hr1G081670.1	HORVU4Hr1G029030.22;HORVU4Hr1G038850.4;HORVU5Hr1G090000.2;HORVU5Hr1G089980.2	HORVU2Hr1G122370.1	560
HORVU7Hr1G069280.1;HORVU4Hr1G082210.1;HORVU5Hr1G082810.1;HORVU7Hr1G074340.1	HORVU4Hr1G031280.1;HORVU7Hr1G084210.2	HORVU2Hr1G122700.1;HORVU2Hr1G122620.1;HORVU2Hr1G122580.1;HORVU2Hr1G122610.1	561
HORVU4Hr1G082400.2	HORVU4Hr1G031530.1	HORVU2Hr1G122800.1;HORVU2Hr1G122760.1;HORVU2Hr1G122780.2	562
HORVU4Hr1G084390.1;HORVU1Hr1G038920.3	HORVU4Hr1G035890.7	HORVU2Hr1G123650.2	563
HORVU4Hr1G085050.1;HORVU7Hr1G054090.4	HORVU4Hr1G036960.1	HORVU2Hr1G124210.9	564
HORVU4Hr1G086300.2	HORVU4Hr1G043490.5	HORVU2Hr1G124960.3	565
HORVU4Hr1G086900.1	HORVU4Hr1G046380.1	HORVU2Hr1G124970.2	566
HORVU4Hr1G087740.2;HORVU7Hr1G107100.1;HORVU6Hr1G027620.2	HORVU4Hr1G047580.2	HORVU2Hr1G124980.2	567
HORVU4Hr1G088140.2;HORVU1Hr1G054250.9	HORVU4Hr1G048640.1	HORVU2Hr1G125050.1	568
HORVU4Hr1G088900.3;HORVU4Hr1G061890.2	HORVU4Hr1G049090.1	HORVU2Hr1G125090.1	569
HORVU4Hr1G089290.7	HORVU4Hr1G050160.2	HORVU2Hr1G125110.6;HORVU4Hr1G090540.1	570
HORVU4Hr1G090050.3;HORVU2Hr1G018530.1	HORVU4Hr1G051320.3;HORVU2Hr1G017450.11	HORVU2Hr1G125120.1;HORVU2Hr1G125170.1	571
HORVU5Hr1G000320.2	HORVU4Hr1G052220.1	HORVU2Hr1G125200.3	572
HORVU5Hr1G001310.1	HORVU4Hr1G052350.5	HORVU2Hr1G126610.4	573
HORVU5Hr1G002040.4;HORVU7Hr1G017640.2;HORVU5Hr1G020370.4;HORVU3Hr1G047030.6;HORVU2Hr1G103860.2;HORVU6Hr1G016800.2	HORVU4Hr1G053660.1	HORVU2Hr1G127540.1;HORVU2Hr1G127520.1	574
HORVU5Hr1G002150.1	HORVU4Hr1G054200.1	HORVU3Hr1G000390.2	575
HORVU5Hr1G005980.2;HORVU5Hr1G082120.28;HORVU1Hr1G031220.7	HORVU5Hr1G039980.1;HORVU4Hr1G054210.6	HORVU3Hr1G000400.2	576
HORVU5Hr1G006330.4;HORVU5Hr1G006630.5	HORVU4Hr1G055060.1;HORVU3Hr1G095530.3	HORVU3Hr1G000620.1	577
HORVU5Hr1G007430.2;HORVU5Hr1G007340.2	HORVU4Hr1G055290.2	HORVU3Hr1G000640.1;HORVU3Hr1G000810.1	578
HORVU5Hr1G010370.2	HORVU4Hr1G056000.12;HORVU1Hr1G024400.2	HORVU3Hr1G000760.3	579
HORVU5Hr1G011460.1	HORVU4Hr1G056050.1;HORVU3Hr1G018650.4;HORVU2Hr1G012660.1;HORVU2Hr1G014390.3	HORVU3Hr1G000800.1	580
HORVU5Hr1G012240.3;HORVU5Hr1G012740.3;HORVU5Hr1G012450.1	HORVU4Hr1G056730.1	HORVU3Hr1G002780.5;HORVU5Hr1G032980.3	581
HORVU5Hr1G012320.4	HORVU4Hr1G056740.5;HORVU5Hr1G100200.3;HORVU5Hr1G100700.3;HORVU6Hr1G085370.2;HORVU6Hr1G085320.3;HORVU4Hr1G056830.1	HORVU3Hr1G003980.3	582
HORVU5Hr1G012890.1;HORVU6Hr1G005400.5	HORVU4Hr1G057890.5	HORVU3Hr1G004060.1	583
HORVU5Hr1G021140.1	HORVU4Hr1G057910.1	HORVU3Hr1G004070.1	584
HORVU5Hr1G022470.1	HORVU4Hr1G058230.1	HORVU3Hr1G004140.1	585
HORVU5Hr1G023660.1	HORVU4Hr1G059090.11	HORVU3Hr1G004250.2;HORVU3Hr1G004280.2;HORVU3Hr1G004300.1;HORVU3Hr1G004290.1;HORVU3Hr1G004230.2	586
HORVU5Hr1G025320.6;HORVU0Hr1G020980.8	HORVU4Hr1G059170.1;HORVU2Hr1G064190.2;HORVU2Hr1G064180.3	HORVU3Hr1G004360.5	587
HORVU5Hr1G025960.2	HORVU4Hr1G059660.2	HORVU3Hr1G004510.1	588
HORVU5Hr1G026170.7	HORVU4Hr1G059980.1	HORVU3Hr1G004850.2	589
HORVU5Hr1G027710.1	HORVU4Hr1G060880.1	HORVU3Hr1G006000.1;HORVU7Hr1G016130.1	590
HORVU5Hr1G034100.2;HORVU5Hr1G075570.1	HORVU4Hr1G061170.3	HORVU3Hr1G006130.2	591
HORVU5Hr1G037020.1	HORVU4Hr1G061500.4;HORVU2Hr1G094490.1	HORVU3Hr1G006140.1;HORVU3Hr1G006100.1	592
HORVU5Hr1G037160.3;HORVU3Hr1G110310.1;HORVU1Hr1G026820.2;HORVU4Hr1G015030.1;HORVU7Hr1G071840.2	HORVU4Hr1G062070.14	HORVU3Hr1G006440.1	593
HORVU5Hr1G040050.2	HORVU4Hr1G062880.3;HORVU3Hr1G087400.11	HORVU3Hr1G006450.1	594
HORVU5Hr1G041730.4;HORVU3Hr1G064680.10	HORVU4Hr1G063000.1	HORVU3Hr1G007410.2	595
HORVU5Hr1G041840.2	HORVU4Hr1G064000.5	HORVU3Hr1G008420.5;HORVU3Hr1G008310.1	596
HORVU5Hr1G042740.2	HORVU4Hr1G064230.5	HORVU3Hr1G010300.1	597
HORVU5Hr1G045440.2	HORVU4Hr1G064380.3;HORVU4Hr1G064340.1;HORVU4Hr1G064360.1	HORVU3Hr1G010530.2	598
HORVU5Hr1G046330.1	HORVU4Hr1G066730.1	HORVU3Hr1G011460.1;HORVU3Hr1G085260.2;HORVU0Hr1G006190.2	599
HORVU5Hr1G047530.3	HORVU4Hr1G066860.5;HORVU4Hr1G007610.1	HORVU3Hr1G012410.6	600
HORVU5Hr1G047790.1;HORVU4Hr1G055880.1	HORVU4Hr1G067390.2	HORVU3Hr1G013350.1	601
HORVU5Hr1G049370.2	HORVU4Hr1G067410.2	HORVU3Hr1G013650.6	602
HORVU5Hr1G050160.1	HORVU4Hr1G068900.17	HORVU3Hr1G013880.1	603
HORVU5Hr1G051790.7	HORVU4Hr1G069280.4	HORVU3Hr1G014120.1;HORVU0Hr1G006240.1	604
HORVU5Hr1G052340.1;HORVU5Hr1G052360.1	HORVU4Hr1G069660.11	HORVU3Hr1G014730.2	605
HORVU5Hr1G052890.2;HORVU7Hr1G079430.2	HORVU7Hr1G100400.2;HORVU6Hr1G006080.2;HORVU6Hr1G011490.2;HORVU6Hr1G005940.2;HORVU6Hr1G005960.7;HORVU5Hr1G110680.1;HORVU6Hr1G006140.1;HORVU6Hr1G006130.6;HORVU6Hr1G006120.2;HORVU4Hr1G070250.3;HORVU6Hr1G006090.1;HORVU6Hr1G011620.1;HORVU4Hr1G058810.1;HORVU3Hr1G099160.1;HORVU0Hr1G013190.1;HORVU7Hr1G100120.13;HORVU5Hr1G069680.1;HORVU7Hr1G100110.4;HORVU7Hr1G100100.3;HORVU5Hr1G069690.1;HORVU3Hr1G014560.1…	HORVU3Hr1G015190.2	606
HORVU5Hr1G053010.2	HORVU4Hr1G071270.5	HORVU3Hr1G016420.3	607
HORVU5Hr1G054080.1;HORVU0Hr1G025900.1;HORVU4Hr1G007560.1	HORVU4Hr1G071360.5	HORVU3Hr1G016860.2	608
HORVU5Hr1G054170.1;HORVU5Hr1G054180.1	HORVU4Hr1G071870.2	HORVU3Hr1G017660.1;HORVU3Hr1G017700.4;HORVU0Hr1G001840.1	609
HORVU5Hr1G055210.2	HORVU4Hr1G071960.2;HORVU4Hr1G072010.1;HORVU1Hr1G060370.1;HORVU1Hr1G060340.2;HORVU1Hr1G049910.1;HORVU0Hr1G038060.2;HORVU0Hr1G006340.1;HORVU3Hr1G029450.1;HORVU3Hr1G029440.1;HORVU2Hr1G011690.1;HORVU6Hr1G049800.1;HORVU6Hr1G053620.1	HORVU3Hr1G017970.1	610
HORVU5Hr1G055350.3	HORVU4Hr1G072280.26	HORVU3Hr1G018230.1;HORVU3Hr1G018220.4	611
HORVU5Hr1G055360.2	HORVU4Hr1G072300.1	HORVU3Hr1G018820.1	612
HORVU5Hr1G056170.1	HORVU4Hr1G072680.2;HORVU4Hr1G072700.1	HORVU3Hr1G018850.2	613
HORVU5Hr1G056380.1	HORVU4Hr1G074120.3	HORVU3Hr1G018880.15	614
HORVU5Hr1G056820.4	HORVU4Hr1G074130.2	HORVU3Hr1G019010.1	615
HORVU5Hr1G057560.1	HORVU4Hr1G074180.9	HORVU3Hr1G019540.2	616
HORVU5Hr1G058430.1;HORVU7Hr1G085770.1;HORVU1Hr1G058470.4;HORVU5Hr1G035620.1	HORVU4Hr1G074680.4;HORVU5Hr1G074200.4;HORVU5Hr1G053560.4	HORVU3Hr1G019790.8	617
HORVU5Hr1G059010.1	HORVU4Hr1G074810.5	HORVU3Hr1G019820.11	618
HORVU5Hr1G061360.1	HORVU4Hr1G075360.5	HORVU3Hr1G020230.3	619
HORVU5Hr1G061770.1;HORVU3Hr1G039880.10	HORVU4Hr1G078010.1	HORVU3Hr1G020250.8	620
HORVU6Hr1G078780.2;HORVU5Hr1G061970.11	HORVU4Hr1G078130.1	HORVU3Hr1G022030.2	621
HORVU5Hr1G062410.6	HORVU4Hr1G078580.2	HORVU3Hr1G022350.3	622
HORVU5Hr1G098600.2;HORVU5Hr1G063770.2	HORVU4Hr1G078750.2;HORVU1Hr1G038700.15	HORVU3Hr1G022640.2	623
HORVU5Hr1G064020.3	HORVU4Hr1G079440.1	HORVU3Hr1G022770.2	624
HORVU5Hr1G065620.1	HORVU4Hr1G079830.2	HORVU3Hr1G022850.32	625
HORVU5Hr1G065650.11	HORVU4Hr1G079950.13	HORVU3Hr1G023400.1	626
HORVU5Hr1G066140.1;HORVU5Hr1G066180.1	HORVU4Hr1G080780.1	HORVU3Hr1G023780.1	627
HORVU5Hr1G066240.1	HORVU4Hr1G081170.1	HORVU3Hr1G023970.2	628
HORVU5Hr1G068440.1	HORVU4Hr1G081600.1;HORVU0Hr1G000450.1;HORVU1Hr1G052350.1	HORVU3Hr1G024170.3	629
HORVU5Hr1G069850.14	HORVU4Hr1G082730.1	HORVU3Hr1G024470.1	630
HORVU5Hr1G071610.1	HORVU4Hr1G082970.2	HORVU3Hr1G024500.1	631
HORVU5Hr1G073900.1	HORVU4Hr1G083950.6	HORVU3Hr1G025680.2	632
HORVU6Hr1G087030.1;HORVU5Hr1G073930.1	HORVU4Hr1G084370.1;HORVU4Hr1G084330.1	HORVU3Hr1G025820.2	633
HORVU5Hr1G074590.2	HORVU4Hr1G084390.1	HORVU3Hr1G025920.2;HORVU4Hr1G087560.1	634
HORVU5Hr1G075330.2	HORVU4Hr1G085050.1	HORVU3Hr1G026330.16;HORVU6Hr1G092540.10	635
HORVU5Hr1G075670.1	HORVU4Hr1G086150.3;HORVU5Hr1G080690.2	HORVU3Hr1G026470.1	636
HORVU5Hr1G077200.2	HORVU4Hr1G086300.2;HORVU2Hr1G073210.3	HORVU3Hr1G026880.1	637
HORVU5Hr1G078960.1	HORVU4Hr1G086500.9;HORVU3Hr1G037600.4;HORVU5Hr1G024550.3	HORVU3Hr1G027850.1;HORVU6Hr1G014050.2	638
HORVU5Hr1G080610.1	HORVU4Hr1G086740.3	HORVU3Hr1G027910.1	639
HORVU5Hr1G080690.2	HORVU4Hr1G087740.2	HORVU3Hr1G028060.2;HORVU3Hr1G028020.7	640
HORVU5Hr1G081370.10;HORVU3Hr1G105710.1	HORVU4Hr1G088140.2	HORVU3Hr1G028210.3	641
HORVU5Hr1G081790.31	HORVU4Hr1G088190.9	HORVU3Hr1G028540.1	642
HORVU5Hr1G082560.2	HORVU4Hr1G088610.1	HORVU3Hr1G028780.1	643
HORVU5Hr1G083350.1;HORVU2Hr1G060310.5	HORVU4Hr1G088620.1	HORVU3Hr1G028810.1	644
HORVU5Hr1G083620.1;HORVU1Hr1G021070.1;HORVU7Hr1G047740.1;HORVU1Hr1G061170.1	HORVU4Hr1G088900.3;HORVU4Hr1G009160.1;HORVU4Hr1G061890.2	HORVU3Hr1G029320.2	645
HORVU5Hr1G084160.2	HORVU4Hr1G089620.1	HORVU3Hr1G030150.1	646
HORVU5Hr1G085070.61	HORVU4Hr1G090050.3	HORVU3Hr1G030760.2	647
HORVU5Hr1G085520.1	HORVU4Hr1G090660.1	HORVU3Hr1G031200.1	648
HORVU5Hr1G085580.2	HORVU4Hr1G090800.2	HORVU3Hr1G031330.1	649
HORVU5Hr1G085610.1	HORVU5Hr1G000010.1	HORVU3Hr1G031850.2	650
HORVU5Hr1G087810.2;HORVU2Hr1G049570.2;HORVU3Hr1G016150.1	HORVU5Hr1G000740.1	HORVU3Hr1G032400.4	651
HORVU6Hr1G032610.8;HORVU5Hr1G088030.1	HORVU5Hr1G000800.3	HORVU3Hr1G033520.1	652
HORVU5Hr1G088140.2	HORVU5Hr1G001000.1	HORVU3Hr1G033720.1	653
HORVU5Hr1G088680.1;HORVU7Hr1G070330.3	HORVU5Hr1G001330.1	HORVU3Hr1G034750.2	654
HORVU5Hr1G088920.4	HORVU5Hr1G002040.4;HORVU7Hr1G017640.2;HORVU5Hr1G020370.4;HORVU2Hr1G103860.2;HORVU6Hr1G016800.2	HORVU3Hr1G035900.1;HORVU3Hr1G091470.1	655
HORVU5Hr1G091910.1	HORVU5Hr1G002140.1	HORVU3Hr1G036150.5	656
HORVU5Hr1G092650.1	HORVU5Hr1G002150.1;HORVU6Hr1G055440.1	HORVU3Hr1G036430.4	657
HORVU5Hr1G092790.1	HORVU5Hr1G003910.2	HORVU3Hr1G036860.2	658
HORVU5Hr1G093700.3	HORVU5Hr1G005770.6	HORVU3Hr1G036870.2	659
HORVU5Hr1G093710.1	HORVU5Hr1G005980.2;HORVU5Hr1G082120.28;HORVU5Hr1G015070.1	HORVU3Hr1G037080.1	660
HORVU5Hr1G094300.2;HORVU2Hr1G005060.4	HORVU5Hr1G006330.4	HORVU3Hr1G037630.2;HORVU3Hr1G037670.1	661
HORVU5Hr1G094510.2;HORVU1Hr1G091230.12;HORVU6Hr1G031440.2;HORVU5Hr1G093370.3;HORVU2Hr1G087930.2;HORVU7Hr1G068410.1;HORVU7Hr1G109640.2;HORVU3Hr1G057440.1;HORVU7Hr1G078170.32	HORVU5Hr1G007050.2	HORVU3Hr1G037720.1	662
HORVU5Hr1G094700.1	HORVU5Hr1G092820.4;HORVU5Hr1G007920.9;HORVU1Hr1G019330.7	HORVU3Hr1G037790.1;HORVU1Hr1G058180.1	663
HORVU5Hr1G094950.2	HORVU5Hr1G009830.3	HORVU3Hr1G037960.1	664
HORVU5Hr1G095080.8;HORVU1Hr1G015130.5;HORVU5Hr1G095060.6;HORVU7Hr1G068460.2;HORVU1Hr1G028570.7;HORVU3Hr1G075310.6;HORVU5Hr1G095220.4	HORVU5Hr1G010860.1	HORVU3Hr1G038190.1	665
HORVU5Hr1G095130.5	HORVU5Hr1G010880.2;HORVU7Hr1G102000.2;HORVU7Hr1G101990.1	HORVU3Hr1G038580.1	666
HORVU5Hr1G096060.1	HORVU5Hr1G012100.1;HORVU5Hr1G012090.6	HORVU3Hr1G038950.1	667
HORVU5Hr1G098630.4;HORVU6Hr1G020950.1;HORVU5Hr1G097270.6	HORVU5Hr1G012240.3	HORVU3Hr1G039130.2	668
HORVU5Hr1G098690.2	HORVU5Hr1G012690.1	HORVU3Hr1G039200.3;HORVU3Hr1G039230.2	669
HORVU5Hr1G102220.2	HORVU5Hr1G012740.3	HORVU3Hr1G039400.5	670
HORVU5Hr1G103430.2	HORVU5Hr1G012890.1	HORVU3Hr1G039980.8	671
HORVU5Hr1G103670.1	HORVU5Hr1G027050.1;HORVU5Hr1G017150.1;HORVU5Hr1G086080.4	HORVU3Hr1G040040.1	672
HORVU5Hr1G103790.1	HORVU5Hr1G021240.1	HORVU3Hr1G040360.1;HORVU7Hr1G095680.6	673
HORVU5Hr1G103850.6	HORVU5Hr1G022070.2	HORVU3Hr1G043390.2	674
HORVU5Hr1G103920.1	HORVU5Hr1G022110.3	HORVU3Hr1G045150.1;HORVU3Hr1G035000.1;HORVU7Hr1G080190.1	675
HORVU5Hr1G106100.5	HORVU5Hr1G022740.1	HORVU3Hr1G045480.6;HORVU3Hr1G045570.1	676
HORVU5Hr1G106970.1	HORVU5Hr1G023660.1;HORVU5Hr1G023690.1	HORVU3Hr1G046320.1;HORVU5Hr1G111190.1	677
HORVU5Hr1G107410.2	HORVU5Hr1G024160.3;HORVU5Hr1G024170.1	HORVU3Hr1G047230.5	678
HORVU5Hr1G107510.2;HORVU4Hr1G074390.1	HORVU5Hr1G025320.6	HORVU3Hr1G047510.1	679
HORVU5Hr1G109340.3	HORVU5Hr1G025420.11	HORVU3Hr1G048310.2	680
HORVU5Hr1G109430.2;HORVU5Hr1G074200.4	HORVU5Hr1G027100.13	HORVU3Hr1G048520.3	681
HORVU5Hr1G109620.1	HORVU5Hr1G027720.1	HORVU3Hr1G048620.1	682
HORVU5Hr1G110410.2	HORVU5Hr1G027730.2	HORVU3Hr1G049120.14	683
HORVU5Hr1G111820.1	HORVU5Hr1G028180.1	HORVU3Hr1G049610.1	684
HORVU5Hr1G111920.2;HORVU4Hr1G013560.1;HORVU4Hr1G013520.1;HORVU5Hr1G101710.1	HORVU5Hr1G029130.19	HORVU3Hr1G049960.4	685
HORVU5Hr1G112790.6	HORVU5Hr1G030500.4	HORVU3Hr1G050700.1	686
HORVU5Hr1G113830.4	HORVU5Hr1G033110.2;HORVU5Hr1G081790.31	HORVU3Hr1G050920.4	687
HORVU5Hr1G114250.1;HORVU3Hr1G085710.1	HORVU5Hr1G060460.6;HORVU5Hr1G033940.1;HORVU4Hr1G066510.7	HORVU3Hr1G050990.2	688
HORVU5Hr1G115780.2	HORVU5Hr1G035100.10	HORVU3Hr1G051010.2	689
HORVU7Hr1G010470.1;HORVU5Hr1G116290.1	HORVU5Hr1G104020.2;HORVU5Hr1G039540.1;HORVU5Hr1G035420.3	HORVU3Hr1G051530.1	690
HORVU5Hr1G116360.1;HORVU5Hr1G014210.1;HORVU5Hr1G014280.3	HORVU5Hr1G036360.3	HORVU3Hr1G051610.1	691
HORVU5Hr1G117760.1	HORVU5Hr1G036460.2;HORVU4Hr1G019780.1	HORVU3Hr1G052380.12	692
HORVU5Hr1G118340.1	HORVU5Hr1G037160.3;HORVU3Hr1G110310.1;HORVU7Hr1G071840.2;HORVU1Hr1G026820.2;HORVU4Hr1G015030.1	HORVU3Hr1G052510.1;HORVU3Hr1G052490.1	693
HORVU5Hr1G120800.4;HORVU5Hr1G120810.2;HORVU5Hr1G120780.1	HORVU5Hr1G037290.3	HORVU3Hr1G053300.1	694
HORVU5Hr1G121810.2;HORVU5Hr1G121800.4	HORVU5Hr1G040740.4	HORVU3Hr1G053380.1	695
HORVU5Hr1G122170.4;HORVU7Hr1G110870.1;HORVU1Hr1G036940.2;HORVU0Hr1G024200.1;HORVU0Hr1G023950.1	HORVU5Hr1G041240.1	HORVU3Hr1G053460.3	696
HORVU5Hr1G122510.1	HORVU5Hr1G041730.4;HORVU3Hr1G064680.10;HORVU2Hr1G030400.3	HORVU3Hr1G054050.2	697
HORVU5Hr1G122640.6	HORVU5Hr1G041860.4	HORVU3Hr1G054090.1	698
HORVU5Hr1G124450.1	HORVU6Hr1G040960.1;HORVU5Hr1G042000.1	HORVU3Hr1G054490.3	699
HORVU5Hr1G124610.8	HORVU5Hr1G043060.4	HORVU3Hr1G054640.2	700
HORVU6Hr1G000090.3;HORVU6Hr1G000130.1;HORVU6Hr1G000070.1	HORVU5Hr1G043520.1	HORVU3Hr1G055920.8	701
HORVU6Hr1G000180.2;HORVU4Hr1G076680.1	HORVU5Hr1G043640.13	HORVU3Hr1G055980.1	702
HORVU6Hr1G000640.18;HORVU2Hr1G115380.5;HORVU3Hr1G089860.4;HORVU2Hr1G115410.2;HORVU2Hr1G115430.1;HORVU2Hr1G115420.1;HORVU2Hr1G115400.1;HORVU5Hr1G110850.1;HORVU5Hr1G110720.2;HORVU5Hr1G090360.1;HORVU7Hr1G103140.2;HORVU5Hr1G110770.1;HORVU5Hr1G084140.4	HORVU5Hr1G045440.2;HORVU2Hr1G054760.1	HORVU3Hr1G055990.1	703
HORVU6Hr1G001150.1	HORVU5Hr1G045450.3	HORVU3Hr1G057320.1	704
HORVU6Hr1G001160.9	HORVU5Hr1G045630.4	HORVU3Hr1G058460.4	705
HORVU6Hr1G001700.1;HORVU6Hr1G020610.1;HORVU4Hr1G034020.1;HORVU6Hr1G001640.1;HORVU4Hr1G048980.2	HORVU5Hr1G045770.1;HORVU5Hr1G113060.1	HORVU3Hr1G058910.1	706
HORVU7Hr1G008880.2;HORVU6Hr1G002030.1;HORVU0Hr1G028320.1;HORVU0Hr1G027490.1;HORVU0Hr1G025910.1;HORVU0Hr1G014780.1;HORVU0Hr1G032330.2;HORVU2Hr1G101720.2;HORVU7Hr1G008810.1	HORVU5Hr1G045850.3	HORVU3Hr1G059140.1	707
HORVU6Hr1G003580.1	HORVU5Hr1G046350.2;HORVU7Hr1G047860.1;HORVU7Hr1G109880.1	HORVU3Hr1G059230.3	708
HORVU6Hr1G005240.3	HORVU5Hr1G047790.1	HORVU3Hr1G059470.1	709
HORVU6Hr1G005390.1;HORVU6Hr1G090070.1;HORVU3Hr1G026750.1;HORVU2Hr1G026620.1;HORVU0Hr1G003770.1;HORVU4Hr1G065700.1;HORVU5Hr1G043400.3;HORVU2Hr1G002240.3	HORVU5Hr1G049430.2	HORVU3Hr1G060480.2	710
HORVU7Hr1G067060.1;HORVU6Hr1G009400.2	HORVU5Hr1G050160.1;HORVU6Hr1G022660.9;HORVU7Hr1G011750.3;HORVU4Hr1G090760.1;HORVU7Hr1G107410.1	HORVU3Hr1G060780.1	711
HORVU6Hr1G011720.2	HORVU5Hr1G051390.1	HORVU3Hr1G060850.3;HORVU3Hr1G060920.3	712
HORVU6Hr1G012000.1	HORVU5Hr1G051500.2	HORVU3Hr1G061130.1	713
HORVU6Hr1G012050.4	HORVU5Hr1G052570.1	HORVU3Hr1G062040.1	714
HORVU6Hr1G016710.2	HORVU5Hr1G054060.2	HORVU3Hr1G063590.2	715
HORVU6Hr1G016810.1	HORVU5Hr1G054080.1	HORVU3Hr1G063670.2	716
HORVU6Hr1G017900.14	HORVU5Hr1G054180.1;HORVU5Hr1G054170.1;HORVU1Hr1G025390.3	HORVU3Hr1G063690.10	717
HORVU6Hr1G018520.4;HORVU0Hr1G038320.7	HORVU5Hr1G054500.5	HORVU3Hr1G064730.1	718
HORVU6Hr1G019290.2	HORVU5Hr1G055350.3;HORVU3Hr1G073020.2	HORVU3Hr1G064990.7;HORVU3Hr1G103360.1;HORVU3Hr1G039630.1;HORVU6Hr1G033930.7;HORVU2Hr1G055690.3	719
HORVU7Hr1G096680.16;HORVU6Hr1G020380.1	HORVU5Hr1G056140.2	HORVU3Hr1G065390.1	720
HORVU6Hr1G020850.3	HORVU5Hr1G056790.1	HORVU3Hr1G065420.1	721
HORVU6Hr1G021250.1;HORVU6Hr1G021260.2;HORVU6Hr1G021160.1	HORVU5Hr1G057790.1;HORVU5Hr1G057780.1;HORVU6Hr1G061970.2	HORVU3Hr1G066430.3	722
HORVU6Hr1G072500.1;HORVU6Hr1G021630.5	HORVU5Hr1G058160.6;HORVU7Hr1G027000.1	HORVU3Hr1G066890.1	723
HORVU6Hr1G023340.1	HORVU5Hr1G058430.1	HORVU3Hr1G066930.1	724
HORVU6Hr1G024780.1	HORVU5Hr1G059550.1	HORVU3Hr1G067030.3	725
HORVU6Hr1G026600.2;HORVU7Hr1G089360.2;HORVU5Hr1G046900.4;HORVU4Hr1G022280.4	HORVU5Hr1G060700.1	HORVU6Hr1G039890.3;HORVU3Hr1G067040.5;HORVU3Hr1G067000.1	726
HORVU6Hr1G027360.2	HORVU5Hr1G061770.1	HORVU3Hr1G067110.1;HORVU3Hr1G051040.1	727
HORVU6Hr1G031590.2;HORVU7Hr1G070180.2	HORVU5Hr1G061860.1	HORVU3Hr1G067530.4	728
HORVU6Hr1G032070.2	HORVU5Hr1G061970.11;HORVU6Hr1G078780.2	HORVU3Hr1G068360.9	729
HORVU6Hr1G032200.3	HORVU5Hr1G062070.1	HORVU3Hr1G068500.2	730
HORVU6Hr1G032710.2	HORVU5Hr1G063770.2;HORVU5Hr1G098600.2;HORVU2Hr1G058390.1;HORVU2Hr1G058370.1	HORVU3Hr1G070690.1;HORVU3Hr1G068620.14	731
HORVU6Hr1G037940.3;HORVU7Hr1G084100.1	HORVU5Hr1G067630.1	HORVU3Hr1G069410.4	732
HORVU6Hr1G039440.1;HORVU0Hr1G039640.2;HORVU7Hr1G098200.2	HORVU5Hr1G068810.2	HORVU3Hr1G070300.2	733
HORVU6Hr1G040900.1	HORVU5Hr1G069030.6	HORVU3Hr1G071570.3;HORVU1Hr1G076480.3	734
HORVU6Hr1G043210.1	HORVU5Hr1G069660.1	HORVU3Hr1G072100.1	735
HORVU6Hr1G044700.5	HORVU5Hr1G069800.4	HORVU3Hr1G072320.2	736
HORVU6Hr1G048410.6;HORVU3Hr1G029200.1;HORVU1Hr1G017740.45	HORVU5Hr1G069850.14;HORVU0Hr1G013220.9	HORVU3Hr1G072900.7	737
HORVU6Hr1G051110.6	HORVU5Hr1G070390.3	HORVU3Hr1G073150.1;HORVU3Hr1G105190.4	738
HORVU6Hr1G051450.1	HORVU5Hr1G070980.5	HORVU3Hr1G073220.3	739
HORVU6Hr1G052420.7	HORVU5Hr1G072140.4	HORVU3Hr1G073230.1;HORVU0Hr1G006930.3;HORVU4Hr1G089090.2	740
HORVU6Hr1G055840.9;HORVU4Hr1G014750.11	HORVU5Hr1G072260.1	HORVU3Hr1G073590.1	741
HORVU6Hr1G055910.2	HORVU5Hr1G072620.4	HORVU3Hr1G073750.4	742
HORVU6Hr1G057640.2	HORVU5Hr1G073350.3	HORVU3Hr1G073780.1	743
HORVU6Hr1G059760.1;HORVU6Hr1G059740.1	HORVU5Hr1G073450.4	HORVU3Hr1G073840.1	744
HORVU6Hr1G060580.1	HORVU5Hr1G073900.1;HORVU5Hr1G015010.1;HORVU5Hr1G073950.4	HORVU3Hr1G074040.3;HORVU3Hr1G074090.1	745
HORVU6Hr1G062960.1;HORVU2Hr1G097730.3;HORVU2Hr1G097720.4;HORVU0Hr1G006460.1;HORVU0Hr1G023750.2	HORVU5Hr1G074770.1	HORVU3Hr1G074220.2	746
HORVU6Hr1G063210.3	HORVU5Hr1G075570.1;HORVU5Hr1G034100.2;HORVU5Hr1G034040.1	HORVU3Hr1G074940.1	747
HORVU6Hr1G063910.1;HORVU2Hr1G048500.1	HORVU5Hr1G076030.2	HORVU3Hr1G076480.23	748
HORVU6Hr1G067180.7	HORVU5Hr1G076700.2	HORVU3Hr1G076920.2	749
HORVU6Hr1G067870.1;HORVU2Hr1G102610.1	HORVU5Hr1G077200.2;HORVU4Hr1G032520.1	HORVU3Hr1G077000.2	750
HORVU6Hr1G068990.2	HORVU5Hr1G078410.26	HORVU3Hr1G077250.1	751
HORVU6Hr1G069260.1	HORVU5Hr1G079180.2	HORVU3Hr1G077660.3	752
HORVU6Hr1G070670.1;HORVU5Hr1G052980.2	HORVU5Hr1G079740.1	HORVU3Hr1G078270.1	753
HORVU6Hr1G071120.4	HORVU5Hr1G081290.3	HORVU3Hr1G078680.1;HORVU3Hr1G078670.2	754
HORVU6Hr1G071390.1;HORVU6Hr1G071520.1;HORVU6Hr1G071270.5	HORVU5Hr1G081370.10	HORVU3Hr1G078940.1;HORVU7Hr1G059990.1	755
HORVU6Hr1G072870.1	HORVU5Hr1G082790.6	HORVU3Hr1G079210.9	756
HORVU6Hr1G073930.3	HORVU5Hr1G082810.1;HORVU7Hr1G069280.1;HORVU4Hr1G082210.1;HORVU7Hr1G074340.1	HORVU3Hr1G079960.5	757
HORVU6Hr1G076430.4;HORVU6Hr1G076420.3	HORVU5Hr1G082890.5	HORVU3Hr1G080010.1	758
HORVU6Hr1G076810.1;HORVU7Hr1G040460.4	HORVU5Hr1G083350.1;HORVU6Hr1G051730.1;HORVU2Hr1G060310.5;HORVU4Hr1G042970.6	HORVU3Hr1G080130.4	759
HORVU6Hr1G077540.1	HORVU5Hr1G083620.1	HORVU3Hr1G080940.1;HORVU3Hr1G080930.1	760
HORVU6Hr1G077860.2;HORVU6Hr1G077960.1;HORVU4Hr1G079990.1;HORVU6Hr1G082710.4;HORVU6Hr1G003270.10;HORVU6Hr1G077930.1	HORVU5Hr1G084010.1	HORVU3Hr1G081060.4	761
HORVU6Hr1G079150.1	HORVU5Hr1G084160.2;HORVU2Hr1G092350.1	HORVU3Hr1G082110.6;HORVU3Hr1G082150.1	762
HORVU6Hr1G083120.2;HORVU5Hr1G039490.1;HORVU2Hr1G002350.1;HORVU7Hr1G088410.1;HORVU3Hr1G001560.1	HORVU5Hr1G084450.1	HORVU3Hr1G083310.1	763
HORVU6Hr1G086940.6	HORVU5Hr1G084610.1	HORVU3Hr1G083380.4;HORVU3Hr1G083370.1	764
HORVU6Hr1G087400.1	HORVU5Hr1G084740.1	HORVU3Hr1G083560.1	765
HORVU6Hr1G088120.3;HORVU2Hr1G088030.1;HORVU0Hr1G031140.1;HORVU7Hr1G062710.1;HORVU5Hr1G074040.2;HORVU2Hr1G031120.1;HORVU2Hr1G031110.2;HORVU1Hr1G065140.2;HORVU1Hr1G061760.1	HORVU5Hr1G085070.61;HORVU5Hr1G040040.6;HORVU6Hr1G012800.9;HORVU2Hr1G020420.2	HORVU3Hr1G083680.1	766
HORVU6Hr1G088440.1;HORVU6Hr1G088420.1	HORVU5Hr1G085310.1	HORVU3Hr1G083780.7	767
HORVU6Hr1G089010.1	HORVU5Hr1G085330.3;HORVU5Hr1G085290.3;HORVU6Hr1G002150.4	HORVU3Hr1G084250.1;HORVU3Hr1G084220.1	768
HORVU6Hr1G091720.6	HORVU5Hr1G085520.1;HORVU2Hr1G059480.1;HORVU4Hr1G052280.1;HORVU4Hr1G052310.1	HORVU3Hr1G084310.1	769
HORVU6Hr1G091950.9	HORVU5Hr1G086770.1	HORVU3Hr1G085130.1	770
HORVU6Hr1G092960.5;HORVU6Hr1G092970.3;HORVU5Hr1G055200.4	HORVU5Hr1G087710.10	HORVU3Hr1G085460.1	771
HORVU6Hr1G093310.1	HORVU5Hr1G087810.2;HORVU2Hr1G049570.2;HORVU3Hr1G029630.1;HORVU3Hr1G016150.1	HORVU3Hr1G086510.1	772
HORVU6Hr1G093940.4	HORVU5Hr1G088030.1;HORVU6Hr1G032610.8	HORVU3Hr1G088080.1;HORVU3Hr1G088270.1	773
HORVU7Hr1G000580.2;HORVU6Hr1G020600.1;HORVU5Hr1G006930.3;HORVU1Hr1G028510.1;HORVU1Hr1G028500.1	HORVU5Hr1G088680.1	HORVU3Hr1G088540.1;HORVU3Hr1G088500.2;HORVU7Hr1G090850.5	774
HORVU7Hr1G001070.17	HORVU5Hr1G092180.1	HORVU3Hr1G088570.1	775
HORVU7Hr1G001190.1	HORVU5Hr1G092840.15	HORVU3Hr1G089420.1	776
HORVU7Hr1G001800.1	HORVU5Hr1G093230.3	HORVU3Hr1G089580.5	777
HORVU7Hr1G002220.1	HORVU5Hr1G093700.3;HORVU5Hr1G117110.1	HORVU3Hr1G090080.1	778
HORVU7Hr1G005720.1;HORVU7Hr1G107080.2	HORVU5Hr1G125730.1;HORVU5Hr1G093980.1	HORVU3Hr1G090360.3	779
HORVU7Hr1G006150.5	HORVU5Hr1G094410.2	HORVU3Hr1G091320.2	780
HORVU7Hr1G006490.2;HORVU6Hr1G005220.3;HORVU4Hr1G066820.2;HORVU1Hr1G049770.2	HORVU5Hr1G094700.1;HORVU5Hr1G094740.1;HORVU5Hr1G094690.2	HORVU3Hr1G091360.4	781
HORVU7Hr1G009230.8	HORVU5Hr1G095060.6	HORVU3Hr1G092660.1	782
HORVU7Hr1G009420.4;HORVU7Hr1G009410.1	HORVU5Hr1G095080.8;HORVU1Hr1G015130.5;HORVU1Hr1G028570.7;HORVU7Hr1G068460.2	HORVU3Hr1G092680.2	783
HORVU7Hr1G011290.1	HORVU5Hr1G095130.5;HORVU5Hr1G095220.4	HORVU3Hr1G092970.2	784
HORVU7Hr1G018000.2;HORVU7Hr1G018190.3;HORVU1Hr1G083130.2;HORVU7Hr1G018100.3	HORVU5Hr1G095910.1;HORVU5Hr1G096010.36	HORVU3Hr1G093040.1;HORVU3Hr1G093030.1	785
HORVU7Hr1G018670.3	HORVU5Hr1G096060.1;HORVU2Hr1G063880.1	HORVU3Hr1G093080.1	786
HORVU7Hr1G019810.1	HORVU5Hr1G097270.6;HORVU5Hr1G098630.4;HORVU6Hr1G020950.1	HORVU3Hr1G093100.1	787
HORVU7Hr1G019930.1	HORVU5Hr1G097590.7	HORVU3Hr1G093320.4	788
HORVU7Hr1G020300.1;HORVU2Hr1G026370.1;HORVU0Hr1G002770.2	HORVU5Hr1G098560.1	HORVU3Hr1G093350.2	789
HORVU7Hr1G020620.2	HORVU5Hr1G099700.2	HORVU3Hr1G093400.1	790
HORVU7Hr1G021230.1	HORVU5Hr1G102930.2;HORVU5Hr1G102770.1	HORVU3Hr1G093710.1;HORVU3Hr1G093620.1	791
HORVU7Hr1G022550.4;HORVU6Hr1G050700.1;HORVU3Hr1G045680.5;HORVU3Hr1G045750.2;HORVU3Hr1G045700.1	HORVU5Hr1G103070.3	HORVU3Hr1G094260.3;HORVU2Hr1G068810.3	792
HORVU7Hr1G023600.8	HORVU5Hr1G103430.2;HORVU5Hr1G103420.1	HORVU3Hr1G094330.1	793
HORVU7Hr1G024570.2	HORVU5Hr1G104620.1	HORVU3Hr1G094550.4	794
HORVU7Hr1G024930.14;HORVU7Hr1G024950.4;HORVU6Hr1G035280.1;HORVU7Hr1G024940.8	HORVU5Hr1G105870.1	HORVU3Hr1G095700.1	795
HORVU7Hr1G025580.1	HORVU5Hr1G106460.1;HORVU3Hr1G113200.9	HORVU3Hr1G096050.1	796
HORVU7Hr1G026830.2;HORVU3Hr1G113280.2	HORVU5Hr1G106550.2	HORVU3Hr1G097230.3	797
HORVU7Hr1G027430.1;HORVU6Hr1G087960.2	HORVU5Hr1G106580.1	HORVU3Hr1G097950.2	798
HORVU7Hr1G028910.3;HORVU7Hr1G115540.9;HORVU1Hr1G023100.1;HORVU5Hr1G076290.2;HORVU1Hr1G061140.3;HORVU0Hr1G032070.1;HORVU7Hr1G114250.2;HORVU0Hr1G028950.10;HORVU7Hr1G031480.1;HORVU7Hr1G031470.3;HORVU4Hr1G033720.1;HORVU6Hr1G083160.1	HORVU5Hr1G106610.2	HORVU3Hr1G098870.2	799
HORVU7Hr1G030660.1	HORVU5Hr1G106730.2	HORVU3Hr1G099550.1	800
HORVU7Hr1G031910.1	HORVU5Hr1G106800.2	HORVU3Hr1G099760.1	801
HORVU7Hr1G033360.1	HORVU5Hr1G106850.1	HORVU3Hr1G100350.2;HORVU1Hr1G088620.1	802
HORVU7Hr1G033470.2	HORVU5Hr1G107250.1	HORVU3Hr1G103540.1;HORVU4Hr1G058840.4	803
HORVU7Hr1G033620.1;HORVU7Hr1G033530.1	HORVU5Hr1G107380.1	HORVU7Hr1G051320.4;HORVU3Hr1G105400.3	804
HORVU7Hr1G035020.1	HORVU5Hr1G107410.2;HORVU5Hr1G000650.1;HORVU5Hr1G026270.2;HORVU3Hr1G117690.9;HORVU6Hr1G021770.2;HORVU1Hr1G063390.2;HORVU5Hr1G000640.4;HORVU5Hr1G019820.1	HORVU3Hr1G106720.2	805
HORVU7Hr1G035450.1	HORVU5Hr1G107510.2	HORVU3Hr1G107280.1	806
HORVU7Hr1G035900.7	HORVU5Hr1G108610.16	HORVU3Hr1G107350.6	807
HORVU7Hr1G036180.1	HORVU5Hr1G109340.3;HORVU5Hr1G109310.1	HORVU3Hr1G108110.26;HORVU4Hr1G049770.13	808
HORVU7Hr1G037140.1	HORVU5Hr1G109390.3	HORVU3Hr1G108390.1;HORVU3Hr1G108360.4	809
HORVU7Hr1G039930.1	HORVU5Hr1G109430.2	HORVU3Hr1G109780.2	810
HORVU7Hr1G040430.1;HORVU5Hr1G079630.2;HORVU7Hr1G093830.21;HORVU7Hr1G054890.2	HORVU5Hr1G109480.8	HORVU3Hr1G110920.1	811
HORVU7Hr1G040730.1	HORVU5Hr1G110750.2;HORVU5Hr1G110800.1;HORVU5Hr1G110880.1;HORVU5Hr1G110870.1	HORVU3Hr1G111160.5	812
HORVU7Hr1G040740.1;HORVU3Hr1G051110.1;HORVU5Hr1G056040.1;HORVU5Hr1G055950.2	HORVU5Hr1G111040.6;HORVU5Hr1G111020.1;HORVU5Hr1G110950.1;HORVU5Hr1G110940.1	HORVU3Hr1G111650.2;HORVU0Hr1G007340.2	813
HORVU7Hr1G042520.1	HORVU5Hr1G111700.1	HORVU3Hr1G111740.2	814
HORVU7Hr1G042910.1;HORVU7Hr1G042890.1;HORVU7Hr1G042900.1	HORVU5Hr1G111820.1;HORVU4Hr1G034100.2	HORVU3Hr1G111760.2	815
HORVU7Hr1G044210.1	HORVU5Hr1G111920.2;HORVU5Hr1G101710.1	HORVU3Hr1G112040.1	816
HORVU7Hr1G045230.2	HORVU7Hr1G055330.1;HORVU5Hr1G112610.1	HORVU3Hr1G113100.8;HORVU5Hr1G123970.5;HORVU6Hr1G012550.8	817
HORVU7Hr1G045800.4;HORVU7Hr1G029110.3	HORVU5Hr1G114510.6	HORVU3Hr1G113620.1	818
HORVU7Hr1G046980.1	HORVU5Hr1G114960.1;HORVU3Hr1G031230.1;HORVU1Hr1G025150.1;HORVU6Hr1G006560.7	HORVU3Hr1G113940.1	819
HORVU7Hr1G047980.2	HORVU5Hr1G115720.3	HORVU3Hr1G114360.3;HORVU5Hr1G045040.1	820
HORVU7Hr1G049190.1	HORVU5Hr1G115780.2;HORVU7Hr1G042520.1	HORVU3Hr1G115120.1	821
HORVU7Hr1G050170.1	HORVU5Hr1G115920.1	HORVU3Hr1G115820.3	822
HORVU7Hr1G051630.3	HORVU5Hr1G116360.1;HORVU5Hr1G014280.3;HORVU5Hr1G014210.1;HORVU2Hr1G022400.3	HORVU3Hr1G116790.2	823
HORVU7Hr1G051710.9	HORVU5Hr1G116580.4;HORVU3Hr1G057890.1;HORVU3Hr1G057880.1	HORVU4Hr1G000020.1;HORVU6Hr1G063790.1	824
HORVU7Hr1G052350.1;HORVU2Hr1G002290.5	HORVU5Hr1G117080.1	HORVU4Hr1G000850.1	825
HORVU7Hr1G052750.1	HORVU6Hr1G055580.1;HORVU6Hr1G055540.3;HORVU5Hr1G120260.3	HORVU4Hr1G000910.3	826
HORVU7Hr1G053170.6;HORVU2Hr1G007980.7;HORVU2Hr1G067750.3	HORVU5Hr1G120810.2;HORVU5Hr1G120800.4	HORVU4Hr1G000930.1;HORVU3Hr1G096360.2;HORVU4Hr1G086350.1	827
HORVU7Hr1G054670.1;HORVU5Hr1G076700.2	HORVU5Hr1G121530.2	HORVU4Hr1G001220.3	828
HORVU7Hr1G054920.1	HORVU5Hr1G122170.4;HORVU1Hr1G036940.2;HORVU0Hr1G024200.1;HORVU0Hr1G023950.1	HORVU4Hr1G001710.1	829
HORVU7Hr1G055560.1	HORVU5Hr1G123440.1	HORVU4Hr1G002100.2	830
HORVU7Hr1G055990.1	HORVU5Hr1G123470.1	HORVU4Hr1G002140.1	831
HORVU7Hr1G057260.1	HORVU5Hr1G125630.4;HORVU5Hr1G125620.13	HORVU4Hr1G002270.3	832
HORVU7Hr1G058490.1	HORVU6Hr1G000090.3;HORVU6Hr1G000070.1	HORVU4Hr1G002530.2	833
HORVU7Hr1G058850.2;HORVU3Hr1G098650.2	HORVU6Hr1G000130.1	HORVU4Hr1G002650.2	834
HORVU7Hr1G059050.2	HORVU6Hr1G000180.2	HORVU4Hr1G003100.5	835
HORVU7Hr1G059240.4	HORVU6Hr1G000380.1;HORVU7Hr1G006180.4	HORVU4Hr1G003120.1	836
HORVU7Hr1G059290.2	HORVU6Hr1G000640.18;HORVU1Hr1G030620.1;HORVU7Hr1G100010.1;HORVU5Hr1G110770.1;HORVU7Hr1G103140.2;HORVU5Hr1G110720.2;HORVU5Hr1G090360.1;HORVU5Hr1G110850.1;HORVU2Hr1G115420.1;HORVU2Hr1G115400.1;HORVU2Hr1G115430.1;HORVU7Hr1G099840.1;HORVU7Hr1G099950.1;HORVU2Hr1G115410.2;HORVU3Hr1G089860.4;HORVU2Hr1G115380.5;HORVU7Hr1G099790.3;HORVU7Hr1G099860.1;HORVU6Hr1G000660.1;HORVU5Hr1G084140.4	HORVU4Hr1G003220.3	837
HORVU7Hr1G059320.3	HORVU6Hr1G001700.1;HORVU4Hr1G034020.1;HORVU4Hr1G048980.2;HORVU6Hr1G020610.1	HORVU4Hr1G004240.1	838
HORVU7Hr1G060310.1	HORVU7Hr1G008880.2;HORVU7Hr1G008810.1;HORVU6Hr1G002030.1;HORVU0Hr1G032330.2;HORVU7Hr1G008790.1;HORVU5Hr1G072190.4;HORVU5Hr1G072150.9;HORVU2Hr1G040170.17	HORVU4Hr1G004410.4;HORVU7Hr1G119250.1	839
HORVU7Hr1G060640.1	HORVU6Hr1G002050.3	HORVU4Hr1G004780.2	840
HORVU7Hr1G063280.1;HORVU5Hr1G054110.2;HORVU2Hr1G086450.1;HORVU2Hr1G086470.1;HORVU5Hr1G054090.1;HORVU5Hr1G054130.1;HORVU5Hr1G054120.1;HORVU2Hr1G086480.1;HORVU5Hr1G054100.1;HORVU6Hr1G037710.1;HORVU7Hr1G098380.1;HORVU7Hr1G098360.1;HORVU4Hr1G078960.1;HORVU1Hr1G058930.1;HORVU4Hr1G090980.1;HORVU6Hr1G053800.1;HORVU1Hr1G034130.1;HORVU1Hr1G034150.1;HORVU4Hr1G049200.1;HORVU6Hr1G005820.1;HORVU5Hr1G010250.1;…	HORVU6Hr1G002110.1	HORVU4Hr1G005100.1	841
HORVU7Hr1G069070.2	HORVU6Hr1G004990.1	HORVU4Hr1G005310.1	842
HORVU7Hr1G069230.2;HORVU4Hr1G000620.1	HORVU6Hr1G005370.9	HORVU4Hr1G005380.1;HORVU4Hr1G005540.1	843
HORVU7Hr1G075700.2	HORVU6Hr1G005390.1;HORVU6Hr1G090070.1;HORVU0Hr1G003770.1;HORVU2Hr1G002240.3;HORVU3Hr1G026750.1;HORVU2Hr1G026620.1;HORVU4Hr1G065700.1;HORVU5Hr1G043400.3	HORVU4Hr1G005440.1	844
HORVU7Hr1G077170.3	HORVU6Hr1G005400.5	HORVU4Hr1G005920.1	845
HORVU7Hr1G078440.9	HORVU6Hr1G009350.17	HORVU4Hr1G006480.5	846
HORVU7Hr1G079640.3	HORVU6Hr1G009400.2;HORVU7Hr1G067060.1	HORVU4Hr1G006500.2	847
HORVU7Hr1G080630.1;HORVU2Hr1G019160.1	HORVU6Hr1G036720.1;HORVU6Hr1G009490.2	HORVU4Hr1G006850.1	848
HORVU7Hr1G081420.5	HORVU6Hr1G011910.30	HORVU4Hr1G007180.4	849
HORVU7Hr1G081880.11	HORVU6Hr1G012710.2	HORVU4Hr1G007370.1	850
HORVU7Hr1G082280.1;HORVU3Hr1G116770.1;HORVU6Hr1G000040.1;HORVU4Hr1G001250.1;HORVU7Hr1G119480.2	HORVU6Hr1G012810.1	HORVU4Hr1G007520.2	851
HORVU7Hr1G083160.12	HORVU6Hr1G015440.1;HORVU7Hr1G066740.1	HORVU4Hr1G007620.2	852
HORVU7Hr1G085220.11	HORVU6Hr1G018520.4	HORVU4Hr1G007850.2	853
HORVU7Hr1G087550.5	HORVU6Hr1G020380.1;HORVU7Hr1G096680.16	HORVU4Hr1G007880.1	854
HORVU7Hr1G088140.2;HORVU3Hr1G031380.1	HORVU6Hr1G020850.3;HORVU7Hr1G022470.1	HORVU4Hr1G007890.1	855
HORVU7Hr1G088580.1;HORVU2Hr1G055560.1;HORVU1Hr1G044880.1;HORVU6Hr1G044840.1	HORVU6Hr1G021630.5;HORVU6Hr1G072500.1;HORVU6Hr1G020300.1	HORVU4Hr1G008270.8	856
HORVU7Hr1G089120.1;HORVU5Hr1G120210.4;HORVU1Hr1G033390.3;HORVU3Hr1G061000.5;HORVU1Hr1G034400.6;HORVU5Hr1G080990.3	HORVU6Hr1G022370.15	HORVU4Hr1G008310.9	857
HORVU7Hr1G089410.4	HORVU6Hr1G022380.3;HORVU4Hr1G035700.1	HORVU4Hr1G008470.1	858
HORVU7Hr1G089600.1;HORVU4Hr1G059430.1	HORVU6Hr1G022430.16	HORVU4Hr1G008940.2	859
HORVU7Hr1G089960.3;HORVU0Hr1G009480.6;HORVU1Hr1G082890.5;HORVU1Hr1G082940.1;HORVU1Hr1G082950.2	HORVU6Hr1G022680.1	HORVU4Hr1G009520.1	860
HORVU7Hr1G090830.1;HORVU7Hr1G090840.1	HORVU6Hr1G025000.1	HORVU4Hr1G010410.4	861
HORVU7Hr1G091260.2	HORVU6Hr1G025290.3	HORVU4Hr1G011020.1	862
HORVU7Hr1G091270.4;HORVU7Hr1G091330.1	HORVU6Hr1G026600.2	HORVU4Hr1G011280.3	863
HORVU7Hr1G091390.3	HORVU6Hr1G027360.2;HORVU7Hr1G067160.1	HORVU4Hr1G011500.1	864
HORVU7Hr1G093400.2	HORVU6Hr1G027570.6	HORVU4Hr1G011610.11	865
HORVU7Hr1G094510.1;HORVU6Hr1G033580.5	HORVU7Hr1G107100.1;HORVU6Hr1G027620.2	HORVU4Hr1G011740.4	866
HORVU7Hr1G095480.2	HORVU6Hr1G028330.1;HORVU7Hr1G115590.12	HORVU4Hr1G011850.1	867
HORVU7Hr1G095550.1;HORVU7Hr1G095460.2;HORVU7Hr1G095490.2	HORVU6Hr1G028730.1	HORVU4Hr1G012530.1	868
HORVU7Hr1G096300.1;HORVU6Hr1G019300.1	HORVU6Hr1G029350.1	HORVU4Hr1G013170.1	869
HORVU7Hr1G097020.1;HORVU0Hr1G011760.1;HORVU3Hr1G058350.35;HORVU5Hr1G046750.1	HORVU6Hr1G029930.1	HORVU4Hr1G013480.2	870
HORVU7Hr1G098560.2	HORVU6Hr1G029950.2	HORVU4Hr1G013550.2	871
HORVU7Hr1G100090.1	HORVU6Hr1G032070.2;HORVU3Hr1G092890.1	HORVU4Hr1G013580.1	872
HORVU7Hr1G100100.3;HORVU7Hr1G100110.4;HORVU7Hr1G100120.13	HORVU6Hr1G033540.12	HORVU4Hr1G013750.1	873
HORVU7Hr1G100490.2	HORVU6Hr1G033840.3	HORVU4Hr1G014130.1;HORVU4Hr1G074270.1;HORVU7Hr1G112740.4	874
HORVU7Hr1G100920.1	HORVU6Hr1G035040.3	HORVU4Hr1G014230.3	875
HORVU7Hr1G101390.1	HORVU6Hr1G035880.1	HORVU4Hr1G016410.2	876
HORVU7Hr1G101590.4	HORVU6Hr1G038010.1	HORVU4Hr1G016440.1	877
HORVU7Hr1G105330.1	HORVU6Hr1G039440.1	HORVU4Hr1G016520.1	878
HORVU7Hr1G106150.2;HORVU5Hr1G116580.4;HORVU3Hr1G057890.1;HORVU3Hr1G057880.1	HORVU6Hr1G041590.4;HORVU6Hr1G068640.1	HORVU4Hr1G016640.2	879
HORVU7Hr1G107770.4	HORVU6Hr1G044840.1	HORVU4Hr1G016810.14	880
HORVU7Hr1G108530.1	HORVU6Hr1G048410.6;HORVU3Hr1G029200.1	HORVU4Hr1G017540.4;HORVU5Hr1G078810.1	881
HORVU7Hr1G108580.2;HORVU3Hr1G092890.1	HORVU7Hr1G088200.3;HORVU6Hr1G049250.6;HORVU0Hr1G031360.2;HORVU5Hr1G064690.8;HORVU3Hr1G053770.2;HORVU0Hr1G033050.1;HORVU2Hr1G028800.2;HORVU0Hr1G033790.1;HORVU5Hr1G064710.3;HORVU0Hr1G029780.1	HORVU4Hr1G018660.1;HORVU4Hr1G018640.2	882
HORVU7Hr1G109140.1;HORVU7Hr1G109080.1;HORVU0Hr1G030650.1;HORVU0Hr1G025250.1;HORVU7Hr1G109020.9;HORVU0Hr1G032410.5;HORVU0Hr1G031750.2	HORVU6Hr1G050720.2;HORVU4Hr1G051210.1	HORVU4Hr1G018650.1	883
HORVU7Hr1G109340.2	HORVU6Hr1G050750.17	HORVU4Hr1G019290.2	884
HORVU7Hr1G109770.1;HORVU7Hr1G014070.2;HORVU6Hr1G069640.1	HORVU6Hr1G052420.7;HORVU2Hr1G081920.3	HORVU4Hr1G019410.3	885
HORVU7Hr1G110760.2	HORVU6Hr1G055090.1	HORVU4Hr1G019530.3	886
HORVU7Hr1G110850.13	HORVU6Hr1G055840.9	HORVU4Hr1G019570.1	887
HORVU7Hr1G111780.2	HORVU6Hr1G056490.2	HORVU4Hr1G019980.1	888
HORVU7Hr1G113270.8	HORVU6Hr1G057670.3	HORVU4Hr1G021270.2	889
HORVU7Hr1G114600.1;HORVU7Hr1G114540.1;HORVU7Hr1G114630.1	HORVU6Hr1G059510.5;HORVU2Hr1G090470.1	HORVU4Hr1G023430.1	890
HORVU7Hr1G114660.3	HORVU6Hr1G059530.2	HORVU4Hr1G023530.1;HORVU4Hr1G023570.2	891
HORVU7Hr1G114950.1;HORVU7Hr1G103870.3	HORVU6Hr1G062050.9	HORVU4Hr1G024590.3	892
HORVU7Hr1G114960.13	HORVU6Hr1G062960.1;HORVU0Hr1G023750.2	HORVU4Hr1G024710.12	893
HORVU7Hr1G115480.1	HORVU6Hr1G063770.2	HORVU4Hr1G025090.1;HORVU5Hr1G048380.2	894
HORVU7Hr1G117850.1;HORVU4Hr1G012540.1;HORVU7Hr1G018870.2	HORVU6Hr1G063910.1	HORVU4Hr1G025820.8	895
HORVU7Hr1G119370.1	HORVU6Hr1G064190.1	HORVU4Hr1G026720.5	896
HORVU7Hr1G121700.1;HORVU4Hr1G082040.2;HORVU7Hr1G072700.1	HORVU6Hr1G064720.1	HORVU4Hr1G026960.1	897
HORVU7Hr1G122120.1;HORVU7Hr1G122100.1	HORVU6Hr1G066890.1	HORVU4Hr1G027150.1	898
REV__HORVU1Hr1G018750.3	HORVU6Hr1G068010.1	HORVU4Hr1G027740.1	899
REV__HORVU1Hr1G038850.2	HORVU6Hr1G069390.1	HORVU4Hr1G028600.1	900
REV__HORVU1Hr1G074890.1	HORVU6Hr1G069560.1	HORVU4Hr1G031620.1	901
REV__HORVU1Hr1G080150.1	HORVU6Hr1G069570.7	HORVU4Hr1G033200.1	902
REV__HORVU1Hr1G082110.2;REV__HORVU7Hr1G092960.2;REV__HORVU7Hr1G050450.2	HORVU6Hr1G069980.1	HORVU4Hr1G035210.3	903
REV__HORVU2Hr1G077410.1	HORVU6Hr1G070480.1	HORVU4Hr1G035450.5	904
REV__HORVU2Hr1G083970.24	HORVU6Hr1G070670.1	HORVU4Hr1G036280.6	905
REV__HORVU3Hr1G005270.2	HORVU6Hr1G071510.4	HORVU4Hr1G038380.12;HORVU0Hr1G005840.5;HORVU2Hr1G123150.4;HORVU1Hr1G055810.4	906
REV__HORVU3Hr1G028840.2	HORVU6Hr1G071520.1;HORVU6Hr1G071390.1;HORVU6Hr1G071210.5	HORVU4Hr1G038960.2	907
REV__HORVU3Hr1G032400.4	HORVU6Hr1G071850.3	HORVU4Hr1G040280.4	908
REV__HORVU3Hr1G096890.1	HORVU6Hr1G072420.12	HORVU4Hr1G040660.1	909
REV__HORVU4Hr1G023670.12	HORVU6Hr1G074260.1	HORVU4Hr1G040770.2;HORVU5Hr1G038710.1	910
REV__HORVU4Hr1G059200.1;REV__HORVU4Hr1G059190.1	HORVU6Hr1G075070.2	HORVU4Hr1G041690.8	911
REV__HORVU5Hr1G032310.3	HORVU6Hr1G075400.10	HORVU4Hr1G043300.1;HORVU4Hr1G031770.1	912
REV__HORVU5Hr1G057260.1	HORVU6Hr1G075750.1;HORVU6Hr1G075800.2;HORVU6Hr1G075780.3	HORVU4Hr1G043910.1;HORVU4Hr1G049880.2;HORVU4Hr1G049820.1	913
REV__HORVU6Hr1G095000.5	HORVU6Hr1G076070.6	HORVU4Hr1G043920.2	914
REV__HORVU7Hr1G097600.1	HORVU6Hr1G076420.3;HORVU0Hr1G017200.1	HORVU4Hr1G044040.16	915
REV__HORVU7Hr1G101770.1	HORVU6Hr1G076430.4	HORVU4Hr1G047340.1	916
REV__HORVU7Hr1G106380.1	HORVU6Hr1G076810.1	HORVU4Hr1G049590.3	917
	HORVU6Hr1G077210.3	HORVU4Hr1G049670.2	918
	HORVU6Hr1G077280.1	HORVU4Hr1G049680.1	919
	HORVU6Hr1G077520.1	HORVU4Hr1G050130.1	920
	HORVU6Hr1G077620.1	HORVU4Hr1G050280.1;HORVU4Hr1G022950.11;HORVU5Hr1G046490.15	921
	HORVU6Hr1G077860.2;HORVU6Hr1G077960.1	HORVU4Hr1G050630.4	922
	HORVU6Hr1G078290.1	HORVU4Hr1G050780.2	923
	HORVU6Hr1G078650.2	HORVU4Hr1G050810.9	924
	HORVU6Hr1G079410.4	HORVU4Hr1G051720.1	925
	HORVU6Hr1G080770.2;HORVU6Hr1G028780.1;HORVU7Hr1G027830.1;HORVU6Hr1G028750.1;HORVU2Hr1G113380.1	HORVU4Hr1G051830.1	926
	HORVU6Hr1G081640.1	HORVU4Hr1G052210.3	927
	HORVU6Hr1G081750.1	HORVU4Hr1G052430.1	928
	HORVU7Hr1G115520.1;HORVU6Hr1G081760.3;HORVU5Hr1G125310.1	HORVU4Hr1G052640.5	929
	HORVU6Hr1G082900.20	HORVU4Hr1G052730.3	930
	HORVU6Hr1G083120.2;HORVU5Hr1G039490.1	HORVU4Hr1G052810.1	931
	HORVU6Hr1G083690.2	HORVU4Hr1G052900.1;HORVU4Hr1G052890.2	932
	HORVU6Hr1G083960.2	HORVU4Hr1G053180.1	933
	HORVU6Hr1G084390.1	HORVU4Hr1G053900.1	934
	HORVU6Hr1G084670.2	HORVU4Hr1G054060.4	935
	HORVU6Hr1G086970.1	HORVU4Hr1G054870.4	936
	HORVU6Hr1G087300.1	HORVU4Hr1G054880.13	937
	HORVU6Hr1G087590.1	HORVU4Hr1G054910.1	938
	HORVU6Hr1G088120.3;HORVU2Hr1G088030.1;HORVU0Hr1G031140.1;HORVU5Hr1G074040.2;HORVU2Hr1G031120.1;HORVU2Hr1G031110.2;HORVU1Hr1G065140.2;HORVU1Hr1G061760.1	HORVU4Hr1G054920.1;HORVU7Hr1G106770.3	939
	HORVU6Hr1G088420.1	HORVU4Hr1G055230.1	940
	HORVU6Hr1G088440.1	HORVU4Hr1G055240.1	941
	HORVU6Hr1G088460.1;HORVU6Hr1G088550.1	HORVU4Hr1G055500.1	942
	HORVU6Hr1G088850.1	HORVU4Hr1G055850.1	943
	HORVU6Hr1G091790.4	HORVU4Hr1G056140.3	944
	HORVU6Hr1G091890.1	HORVU4Hr1G056240.2	945
	HORVU6Hr1G091950.9;HORVU0Hr1G004300.1	HORVU4Hr1G056820.1	946
	HORVU6Hr1G092480.4	HORVU4Hr1G057210.1;HORVU4Hr1G057170.5	947
	HORVU6Hr1G092960.5;HORVU5Hr1G055200.4;HORVU6Hr1G092970.3	HORVU4Hr1G057200.4	948
	HORVU6Hr1G093510.1	HORVU4Hr1G057650.8	949
	HORVU6Hr1G093860.1	HORVU4Hr1G057700.2	950
	HORVU6Hr1G094240.3	HORVU4Hr1G057740.1	951
	HORVU6Hr1G094560.1	HORVU4Hr1G058010.1	952
	HORVU6Hr1G094650.5	HORVU4Hr1G058210.4	953
	HORVU6Hr1G095140.34	HORVU4Hr1G059060.2	954
	HORVU7Hr1G000580.2;HORVU6Hr1G020600.1;HORVU2Hr1G055120.1;HORVU5Hr1G006930.3	HORVU4Hr1G059130.6	955
	HORVU7Hr1G000630.1	HORVU4Hr1G059240.2	956
	HORVU7Hr1G000970.1	HORVU4Hr1G059270.2	957
	HORVU7Hr1G001010.2	HORVU4Hr1G059390.1	958
	HORVU7Hr1G001040.6	HORVU4Hr1G059840.1	959
	HORVU7Hr1G001070.17;HORVU7Hr1G000270.1;HORVU6Hr1G004010.1	HORVU4Hr1G060190.1	960
	HORVU7Hr1G001310.1	HORVU4Hr1G060380.1;HORVU3Hr1G085830.1	961
	HORVU7Hr1G001560.1;HORVU2Hr1G042180.2	HORVU4Hr1G060870.1	962
	HORVU7Hr1G001570.1	HORVU4Hr1G062310.1	963
	HORVU7Hr1G003870.15	HORVU4Hr1G062630.2	964
	HORVU7Hr1G004940.1	HORVU4Hr1G062940.1	965
	HORVU7Hr1G006490.2;HORVU4Hr1G066820.2;HORVU1Hr1G049770.2	HORVU4Hr1G063180.2	966
	HORVU7Hr1G007220.1	HORVU4Hr1G063810.1	967
	HORVU7Hr1G007580.1	HORVU4Hr1G063820.1	968
	HORVU7Hr1G009420.4;HORVU7Hr1G009410.1;HORVU7Hr1G009260.2;HORVU7Hr1G036020.1	HORVU4Hr1G064110.2	969
	HORVU7Hr1G010680.3	HORVU4Hr1G064710.1	970
	HORVU7Hr1G011400.2	HORVU4Hr1G064720.1	971
	HORVU7Hr1G012190.2	HORVU4Hr1G065380.1	972
	HORVU7Hr1G018100.3;HORVU7Hr1G018000.2;HORVU7Hr1G018190.3	HORVU4Hr1G066240.1;HORVU4Hr1G066200.1	973
	HORVU7Hr1G019810.1;HORVU5Hr1G065650.11	HORVU4Hr1G066270.1;HORVU4Hr1G066230.1	974
	HORVU7Hr1G019930.1;HORVU5Hr1G019220.15	HORVU4Hr1G066900.1	975
	HORVU7Hr1G020300.1;HORVU2Hr1G026370.1;HORVU0Hr1G002770.2;HORVU2Hr1G064420.2;HORVU4Hr1G050680.1;HORVU2Hr1G127650.2;HORVU2Hr1G127480.1	HORVU4Hr1G067020.1	976
	HORVU7Hr1G021860.7;HORVU7Hr1G087810.4;HORVU6Hr1G063480.6	HORVU4Hr1G067370.1	977
	HORVU7Hr1G022210.2	HORVU4Hr1G067520.2	978
	HORVU7Hr1G022250.5	HORVU4Hr1G067810.1	979
	HORVU7Hr1G022550.4	HORVU4Hr1G067860.1;HORVU6Hr1G021030.3	980
	HORVU7Hr1G023970.1	HORVU4Hr1G068460.3;HORVU0Hr1G008980.1;HORVU0Hr1G008970.1	981
	HORVU7Hr1G024220.2	HORVU4Hr1G069230.4	982
	HORVU7Hr1G024930.14	HORVU4Hr1G070150.3	983
	HORVU7Hr1G024950.4	HORVU4Hr1G070220.7	984
	HORVU7Hr1G025300.3	HORVU4Hr1G070370.1;HORVU6Hr1G080910.3	985
	HORVU7Hr1G025530.1	HORVU4Hr1G070630.2	986
	HORVU7Hr1G025910.1	HORVU4Hr1G070980.1	987
	HORVU7Hr1G027050.3;HORVU6Hr1G087920.7	HORVU4Hr1G071480.8	988
	HORVU7Hr1G027430.1	HORVU4Hr1G072020.1	989
	HORVU7Hr1G027440.2	HORVU4Hr1G072210.1	990
	HORVU7Hr1G027930.7	HORVU4Hr1G072320.2;HORVU3Hr1G099270.3;HORVU3Hr1G093840.1	991
	HORVU7Hr1G028540.2	HORVU4Hr1G072360.4	992
	HORVU7Hr1G028910.3;HORVU5Hr1G076290.2;HORVU1Hr1G023100.1;HORVU0Hr1G032540.1;HORVU0Hr1G032070.1;HORVU0Hr1G028950.10;HORVU7Hr1G031480.1;HORVU4Hr1G033720.1;HORVU7Hr1G031470.3;HORVU6Hr1G083160.1	HORVU4Hr1G072480.1	993
	HORVU7Hr1G031720.3;HORVU2Hr1G096800.1	HORVU4Hr1G072500.3;HORVU4Hr1G072560.1	994
	HORVU7Hr1G033170.1	HORVU4Hr1G072770.2	995
	HORVU7Hr1G035800.1	HORVU4Hr1G072910.1;HORVU4Hr1G072880.2	996
	HORVU7Hr1G037220.1	HORVU4Hr1G072920.1	997
	HORVU7Hr1G038210.3	HORVU4Hr1G072940.4	998
	HORVU7Hr1G039930.1;HORVU7Hr1G040080.2	HORVU4Hr1G073630.1	999
	HORVU7Hr1G040430.1;HORVU7Hr1G054890.2;HORVU0Hr1G040290.1;HORVU5Hr1G079630.2;HORVU7Hr1G093830.21	HORVU4Hr1G074620.2;HORVU4Hr1G074530.5	1000
	HORVU7Hr1G040730.1;HORVU3Hr1G051110.1;HORVU5Hr1G056040.1;HORVU7Hr1G033620.1;HORVU5Hr1G055950.2;HORVU7Hr1G033530.1	HORVU4Hr1G075710.1	1001
	HORVU7Hr1G040740.1	HORVU4Hr1G075800.1;HORVU4Hr1G005910.3;HORVU4Hr1G005890.1	1002
	HORVU7Hr1G041610.1;HORVU1Hr1G079980.1;HORVU6Hr1G073570.3	HORVU4Hr1G075950.5	1003
	HORVU7Hr1G043090.1	HORVU4Hr1G076100.13	1004
	HORVU7Hr1G044310.4	HORVU4Hr1G076770.2;HORVU2Hr1G031490.1	1005
	HORVU7Hr1G045140.1	HORVU4Hr1G077240.1	1006
	HORVU7Hr1G045400.2	HORVU4Hr1G077250.1	1007
	HORVU7Hr1G045410.14	HORVU4Hr1G077300.1	1008
	HORVU7Hr1G047070.5	HORVU4Hr1G078820.3	1009
	HORVU7Hr1G047400.1	HORVU4Hr1G079190.1	1010
	HORVU7Hr1G047760.2	HORVU4Hr1G079230.1	1011
	HORVU7Hr1G048140.2	HORVU4Hr1G079800.1	1012
	HORVU7Hr1G048710.4;HORVU2Hr1G083080.12	HORVU4Hr1G080140.1	1013
	HORVU7Hr1G049960.2	HORVU4Hr1G080610.2	1014
	HORVU7Hr1G050170.1;HORVU5Hr1G052980.2	HORVU4Hr1G080640.1;HORVU7Hr1G045470.2	1015
	HORVU7Hr1G051430.5	HORVU4Hr1G081100.1	1016
	HORVU7Hr1G052350.1	HORVU4Hr1G081110.3	1017
	HORVU7Hr1G052580.1	HORVU4Hr1G081150.1	1018
	HORVU7Hr1G052720.2	HORVU4Hr1G081940.3	1019
	HORVU7Hr1G053170.6;HORVU2Hr1G067750.3;HORVU2Hr1G007980.7	HORVU4Hr1G082050.5	1020
	HORVU7Hr1G053390.5	HORVU4Hr1G082280.2	1021
	HORVU7Hr1G054670.1	HORVU4Hr1G082570.1	1022
	HORVU7Hr1G055560.1;HORVU5Hr1G052890.2	HORVU4Hr1G083210.3	1023
	HORVU7Hr1G055980.7	HORVU4Hr1G083470.3	1024
	HORVU7Hr1G056420.2	HORVU4Hr1G084000.9	1025
	HORVU7Hr1G056980.1	HORVU4Hr1G084420.2	1026
	HORVU7Hr1G058730.9	HORVU4Hr1G084810.2	1027
	HORVU7Hr1G058850.2	HORVU4Hr1G085750.12	1028
	HORVU7Hr1G060620.1	HORVU4Hr1G087230.2;HORVU4Hr1G090600.2	1029
	HORVU7Hr1G060990.2	HORVU4Hr1G087340.1	1030
	HORVU7Hr1G061180.4	HORVU4Hr1G087630.1	1031
	HORVU7Hr1G061220.1	HORVU4Hr1G088390.1	1032
	HORVU7Hr1G061610.1	HORVU4Hr1G088780.1	1033
	HORVU7Hr1G062510.5	HORVU4Hr1G088870.1	1034
	HORVU7Hr1G063280.1;HORVU5Hr1G054090.1;HORVU5Hr1G054100.1;HORVU5Hr1G054110.2;HORVU5Hr1G054120.1;HORVU5Hr1G054130.1;HORVU2Hr1G086450.1;HORVU2Hr1G086470.1;HORVU2Hr1G086480.1;HORVU1Hr1G058930.1;HORVU4Hr1G087880.1;HORVU4Hr1G087850.1;HORVU7Hr1G098380.1;HORVU7Hr1G098360.1;HORVU6Hr1G037710.1;HORVU6Hr1G005820.1;HORVU4Hr1G090980.1;HORVU4Hr1G078960.1;HORVU4Hr1G049200.1;HORVU4Hr1G020020.1;HORVU7Hr1G102950.1;…	HORVU4Hr1G089080.3	1035
	HORVU7Hr1G065990.6	HORVU4Hr1G089310.19	1036
	HORVU7Hr1G069230.2	HORVU4Hr1G089510.3	1037
	HORVU7Hr1G070210.14	HORVU4Hr1G089540.2	1038
	HORVU7Hr1G070920.3;HORVU4Hr1G066530.2	HORVU4Hr1G090860.12	1039
	HORVU7Hr1G071700.1	HORVU5Hr1G000580.1	1040
	HORVU7Hr1G073060.2	HORVU5Hr1G002010.1	1041
	HORVU7Hr1G074660.3;HORVU7Hr1G074640.13	HORVU5Hr1G002180.1	1042
	HORVU7Hr1G075700.2;HORVU7Hr1G081290.2	HORVU5Hr1G002320.2	1043
	HORVU7Hr1G075790.10	HORVU5Hr1G005180.1;HORVU5Hr1G051950.1;HORVU5Hr1G005510.1	1044
	HORVU7Hr1G076910.2	HORVU5Hr1G005290.1	1045
	HORVU7Hr1G078140.3	HORVU5Hr1G005310.3;HORVU5Hr1G051960.1	1046
	HORVU7Hr1G078800.10	HORVU5Hr1G006320.1	1047
	HORVU7Hr1G080800.2	HORVU5Hr1G006730.2	1048
	HORVU7Hr1G082280.1;HORVU6Hr1G000040.1	HORVU5Hr1G006780.7	1049
	HORVU7Hr1G082730.3	HORVU5Hr1G007000.1	1050
	HORVU7Hr1G082910.2	HORVU5Hr1G007830.5	1051
	HORVU7Hr1G085220.11;HORVU5Hr1G053010.2	HORVU5Hr1G007960.1	1052
	HORVU7Hr1G085240.2	HORVU5Hr1G008300.1;HORVU5Hr1G013360.1;HORVU0Hr1G008040.1;HORVU6Hr1G004100.1;HORVU6Hr1G018630.1;HORVU4Hr1G030090.1	1053
	HORVU7Hr1G087690.1	HORVU5Hr1G009040.2	1054
	HORVU7Hr1G088140.2	HORVU5Hr1G009740.2	1055
	HORVU7Hr1G088260.4	HORVU5Hr1G010330.1	1056
	HORVU7Hr1G088580.1;HORVU2Hr1G055560.1;HORVU1Hr1G044880.1	HORVU5Hr1G012160.1	1057
	HORVU7Hr1G089120.1;HORVU3Hr1G071740.1;HORVU5Hr1G120210.4;HORVU1Hr1G033390.3;HORVU1Hr1G034400.6;HORVU7Hr1G052840.2;HORVU5Hr1G080990.3;HORVU2Hr1G027660.3;HORVU7Hr1G091490.1	HORVU5Hr1G012200.1	1058
	HORVU7Hr1G089160.3	HORVU5Hr1G013180.2;HORVU5Hr1G013170.1	1059
	HORVU7Hr1G089600.1	HORVU5Hr1G013250.1;HORVU5Hr1G013240.1	1060
	HORVU7Hr1G090710.9	HORVU5Hr1G014350.2	1061
	HORVU7Hr1G090840.1;HORVU7Hr1G090830.1	HORVU5Hr1G014980.19	1062
	HORVU7Hr1G091260.2;HORVU7Hr1G091270.4	HORVU5Hr1G016400.5	1063
	HORVU7Hr1G091800.1	HORVU5Hr1G017680.1	1064
	HORVU7Hr1G093260.1	HORVU5Hr1G018080.2	1065
	HORVU7Hr1G093400.2;HORVU7Hr1G091390.3;HORVU1Hr1G069000.1;HORVU2Hr1G026380.1;HORVU0Hr1G002800.1	HORVU5Hr1G019030.9	1066
	HORVU7Hr1G093630.1	HORVU5Hr1G021300.3;HORVU5Hr1G021310.1	1067
	HORVU7Hr1G094510.1	HORVU5Hr1G021560.1	1068
	HORVU7Hr1G095550.1	HORVU5Hr1G021580.1;HORVU5Hr1G021530.2	1069
	HORVU7Hr1G095730.1	HORVU5Hr1G021730.2	1070
	HORVU7Hr1G095810.7;HORVU1Hr1G018740.1;HORVU6Hr1G017820.5;HORVU3Hr1G057660.34;HORVU3Hr1G056200.1;HORVU1Hr1G090940.17	HORVU5Hr1G022100.2;HORVU5Hr1G013770.1	1071
	HORVU7Hr1G096300.1	HORVU5Hr1G023720.1	1072
	HORVU7Hr1G097020.1;HORVU5Hr1G046750.1;HORVU0Hr1G011760.1;HORVU3Hr1G058350.35	HORVU5Hr1G023740.2;HORVU5Hr1G023730.10	1073
	HORVU7Hr1G097860.2	HORVU5Hr1G023800.7	1074
	HORVU7Hr1G098220.4;HORVU1Hr1G093710.1;HORVU7Hr1G098210.1;HORVU2Hr1G046310.1;HORVU2Hr1G046330.3;HORVU1Hr1G093600.2;HORVU2Hr1G046290.1;HORVU1Hr1G093760.13;HORVU3Hr1G052880.4;HORVU5Hr1G063340.3;HORVU3Hr1G057540.3	HORVU5Hr1G024250.1	1075
	HORVU7Hr1G099650.1	HORVU5Hr1G024350.1	1076
	HORVU7Hr1G099870.2	HORVU5Hr1G024440.1	1077
	HORVU7Hr1G100500.1	HORVU5Hr1G025900.5	1078
	HORVU7Hr1G100810.1	HORVU5Hr1G026730.1	1079
	HORVU7Hr1G101230.1	HORVU5Hr1G026770.2	1080
	HORVU7Hr1G101590.4;HORVU7Hr1G101610.1	HORVU5Hr1G027250.12	1081
	HORVU7Hr1G102030.1	HORVU5Hr1G027810.1	1082
	HORVU7Hr1G102060.1	HORVU5Hr1G027910.15	1083
	HORVU7Hr1G103510.3	HORVU5Hr1G028260.1	1084
	HORVU7Hr1G103870.3	HORVU5Hr1G028360.3	1085
	HORVU7Hr1G104180.1;HORVU7Hr1G104350.1	HORVU5Hr1G028870.1	1086
	HORVU7Hr1G104220.3;HORVU6Hr1G026350.1;HORVU3Hr1G025900.2;HORVU1Hr1G058980.1	HORVU5Hr1G031980.11	1087
	HORVU7Hr1G106150.2	HORVU5Hr1G032650.1	1088
	HORVU7Hr1G107210.1	HORVU5Hr1G033480.2	1089
	HORVU7Hr1G107700.25	HORVU5Hr1G033930.8	1090
	HORVU7Hr1G109140.1;HORVU0Hr1G030650.1;HORVU0Hr1G025250.1;HORVU7Hr1G109020.9;HORVU0Hr1G032410.5;HORVU0Hr1G031750.2;HORVU7Hr1G109080.1	HORVU7Hr1G067280.1;HORVU5Hr1G034770.1;HORVU2Hr1G031940.9;HORVU5Hr1G104140.1	1091
	HORVU7Hr1G109770.1	HORVU5Hr1G034810.1	1092
	HORVU7Hr1G110760.2;HORVU7Hr1G110770.4	HORVU5Hr1G036630.1	1093
	HORVU7Hr1G111600.4	HORVU5Hr1G038090.3	1094
	HORVU7Hr1G114250.2	HORVU5Hr1G038920.1	1095
	HORVU7Hr1G114660.3;HORVU2Hr1G081460.2	HORVU5Hr1G039850.3	1096
	HORVU7Hr1G114950.1	HORVU5Hr1G040160.3	1097
	HORVU7Hr1G115540.9;HORVU1Hr1G061140.3	HORVU5Hr1G040970.5	1098
	HORVU7Hr1G115900.1	HORVU5Hr1G041120.1	1099
	HORVU7Hr1G117850.1;HORVU4Hr1G012540.1	HORVU5Hr1G042050.1	1100
	HORVU7Hr1G117870.9	HORVU5Hr1G042230.7	1101
	HORVU7Hr1G118440.2	HORVU5Hr1G042310.1	1102
	HORVU7Hr1G118450.1	HORVU5Hr1G043190.2	1103
	HORVU7Hr1G120520.1;HORVU0Hr1G038330.13;HORVU6Hr1G094880.19	HORVU5Hr1G043650.2	1104
	HORVU7Hr1G121700.1;HORVU4Hr1G082040.2;HORVU7Hr1G072700.1;HORVU6Hr1G008730.1;HORVU6Hr1G008640.8	HORVU5Hr1G044350.8	1105
	REV__CON__P01030;REV__CON__ENSEMBL:ENSBTAP00000007350	HORVU5Hr1G045150.4	1106
	REV__HORVU1Hr1G037650.5	HORVU5Hr1G045620.1	1107
	REV__HORVU1Hr1G050580.7	HORVU5Hr1G045800.5	1108
	REV__HORVU1Hr1G079450.2;REV__HORVU3Hr1G066600.1	HORVU5Hr1G045820.1	1109
	REV__HORVU1Hr1G089890.9	HORVU5Hr1G046550.1	1110
	REV__HORVU2Hr1G016990.2	HORVU5Hr1G047730.1	1111
	REV__HORVU2Hr1G022990.1	HORVU5Hr1G048010.1	1112
	REV__HORVU2Hr1G038830.3	HORVU5Hr1G048300.3	1113
	REV__HORVU2Hr1G041950.1	HORVU5Hr1G048890.2;HORVU5Hr1G048880.1	1114
	REV__HORVU2Hr1G081140.18	HORVU5Hr1G049020.1	1115
	REV__HORVU2Hr1G099470.5	HORVU5Hr1G050120.1;HORVU5Hr1G050140.1	1116
	REV__HORVU2Hr1G103240.1;REV__HORVU2Hr1G103190.1	HORVU5Hr1G050560.1	1117
	REV__HORVU3Hr1G089950.1	HORVU5Hr1G051220.1	1118
	REV__HORVU3Hr1G090760.1	HORVU5Hr1G051310.1	1119
	REV__HORVU3Hr1G095760.14	HORVU5Hr1G051850.8	1120
	REV__HORVU4Hr1G052570.1	HORVU5Hr1G051970.4	1121
	REV__HORVU4Hr1G055300.1	HORVU5Hr1G052090.2;HORVU2Hr1G005420.1	1122
	REV__HORVU4Hr1G079010.1	HORVU5Hr1G052100.13	1123
	REV__HORVU5Hr1G012900.9	HORVU5Hr1G052240.6;HORVU6Hr1G062080.1;HORVU2Hr1G019060.1;HORVU1Hr1G061060.1;HORVU6Hr1G064520.1;HORVU5Hr1G031630.1	1124
	REV__HORVU7Hr1G002370.2;REV__HORVU7Hr1G002720.1	HORVU5Hr1G052280.1	1125
	REV__HORVU7Hr1G008210.5	HORVU5Hr1G053300.3	1126
		HORVU5Hr1G053680.3	1127
		HORVU5Hr1G053950.13	1128
		HORVU5Hr1G055840.3	1129
		HORVU5Hr1G056470.1	1130
		HORVU5Hr1G056530.4	1131
		HORVU5Hr1G057050.29	1132
		HORVU5Hr1G057520.1	1133
		HORVU5Hr1G057800.3	1134
		HORVU5Hr1G058950.3	1135
		HORVU5Hr1G059430.56;HORVU6Hr1G034610.3	1136
		HORVU5Hr1G060250.1	1137
		HORVU5Hr1G060620.1	1138
		HORVU5Hr1G060800.2	1139
		HORVU5Hr1G061170.1	1140
		HORVU5Hr1G061530.3	1141
		HORVU5Hr1G062030.9;HORVU6Hr1G032760.3	1142
		HORVU5Hr1G062090.1	1143
		HORVU5Hr1G062310.1	1144
		HORVU7Hr1G113500.1;HORVU5Hr1G065170.1;HORVU6Hr1G029050.1	1145
		HORVU5Hr1G066000.1	1146
		HORVU5Hr1G066230.1	1147
		HORVU5Hr1G066250.3	1148
		HORVU5Hr1G066330.1	1149
		HORVU5Hr1G066960.2;HORVU5Hr1G058370.1	1150
		HORVU5Hr1G067090.1	1151
		HORVU5Hr1G067360.2	1152
		HORVU5Hr1G067570.1	1153
		HORVU5Hr1G067760.1	1154
		HORVU5Hr1G067880.3	1155
		HORVU5Hr1G068630.33	1156
		HORVU5Hr1G070040.1	1157
		HORVU5Hr1G070720.1	1158
		HORVU5Hr1G072420.2	1159
		HORVU5Hr1G072520.1	1160
		HORVU5Hr1G072560.1	1161
		HORVU5Hr1G073990.1	1162
		HORVU5Hr1G074270.2	1163
		HORVU5Hr1G074350.1	1164
		HORVU5Hr1G074900.1	1165
		HORVU5Hr1G075370.1;HORVU5Hr1G075400.1	1166
		HORVU5Hr1G075500.3;HORVU5Hr1G075420.2	1167
		HORVU5Hr1G075490.3	1168
		HORVU5Hr1G076080.1	1169
		HORVU5Hr1G076130.3	1170
		HORVU5Hr1G076140.7	1171
		HORVU5Hr1G076230.5	1172
		HORVU5Hr1G076250.1	1173
		HORVU5Hr1G076600.2;HORVU1Hr1G068490.1;HORVU0Hr1G001180.1	1174
		HORVU5Hr1G078000.8	1175
		HORVU5Hr1G078120.2	1176
		HORVU5Hr1G078400.1;HORVU7Hr1G098810.1	1177
		HORVU5Hr1G078540.2	1178
		HORVU5Hr1G079230.1;HORVU0Hr1G013390.3	1179
		HORVU5Hr1G080280.3	1180
		HORVU5Hr1G081010.1	1181
		HORVU5Hr1G082630.5	1182
		HORVU5Hr1G083920.13	1183
		HORVU5Hr1G084070.1	1184
		HORVU5Hr1G084510.3	1185
		HORVU5Hr1G084540.1	1186
		HORVU5Hr1G084900.2	1187
		HORVU5Hr1G085530.1	1188
		HORVU5Hr1G086610.1	1189
		HORVU5Hr1G087730.4	1190
		HORVU5Hr1G087760.1	1191
		HORVU5Hr1G088290.2	1192
		HORVU5Hr1G088300.1	1193
		HORVU5Hr1G088700.1	1194
		HORVU5Hr1G089380.1	1195
		HORVU5Hr1G089780.1	1196
		HORVU5Hr1G089970.2	1197
		HORVU5Hr1G092190.1;HORVU2Hr1G072180.1	1198
		HORVU5Hr1G092260.1	1199
		HORVU5Hr1G092570.1	1200
		HORVU5Hr1G092610.3	1201
		HORVU5Hr1G092630.1;HORVU5Hr1G040070.2	1202
		HORVU5Hr1G092920.6;HORVU0Hr1G009910.2	1203
		HORVU5Hr1G092960.4	1204
		HORVU5Hr1G093290.1	1205
		HORVU5Hr1G093770.1;HORVU5Hr1G054200.1	1206
		HORVU5Hr1G094370.1	1207
		HORVU5Hr1G094750.2	1208
		HORVU5Hr1G095410.1;HORVU5Hr1G095340.1	1209
		HORVU5Hr1G096370.1	1210
		HORVU5Hr1G096470.2	1211
		HORVU5Hr1G097020.5	1212
		HORVU5Hr1G097150.1	1213
		HORVU5Hr1G098090.1	1214
		HORVU5Hr1G098910.2	1215
		HORVU5Hr1G098960.2	1216
		HORVU5Hr1G099820.1;HORVU0Hr1G030280.2	1217
		HORVU5Hr1G100770.1	1218
		HORVU5Hr1G100900.2	1219
		HORVU5Hr1G100910.1	1220
		HORVU5Hr1G101740.3	1221
		HORVU5Hr1G102900.1	1222
		HORVU5Hr1G103180.1;HORVU2Hr1G038830.3	1223
		HORVU5Hr1G103330.3	1224
		HORVU5Hr1G103590.3	1225
		HORVU5Hr1G103680.1	1226
		HORVU5Hr1G103890.35	1227
		HORVU5Hr1G104580.1;HORVU5Hr1G104740.2	1228
		HORVU5Hr1G104700.3	1229
		HORVU5Hr1G104720.1;HORVU7Hr1G088070.1	1230
		HORVU5Hr1G105060.2	1231
		HORVU5Hr1G105480.1	1232
		HORVU5Hr1G105750.1	1233
		HORVU5Hr1G106380.6	1234
		HORVU5Hr1G106440.1;HORVU4Hr1G014100.3;HORVU5Hr1G008250.19	1235
		HORVU5Hr1G108990.2	1236
		HORVU5Hr1G109190.1	1237
		HORVU5Hr1G109300.4	1238
		HORVU5Hr1G109760.1	1239
		HORVU5Hr1G109910.2	1240
		HORVU5Hr1G110330.1;HORVU7Hr1G022970.1	1241
		HORVU5Hr1G111110.5;HORVU5Hr1G111140.2	1242
		HORVU5Hr1G111410.1	1243
		HORVU5Hr1G111500.2;HORVU2Hr1G054780.5	1244
		HORVU5Hr1G111620.1;HORVU5Hr1G030110.1	1245
		HORVU5Hr1G111860.2	1246
		HORVU5Hr1G112380.1	1247
		HORVU5Hr1G112850.1	1248
		HORVU5Hr1G113010.2	1249
		HORVU5Hr1G113180.1	1250
		HORVU5Hr1G113810.3	1251
		HORVU5Hr1G113880.27	1252
		HORVU5Hr1G114110.1	1253
		HORVU5Hr1G115100.2	1254
		HORVU5Hr1G116650.1	1255
		HORVU5Hr1G116710.5	1256
		HORVU5Hr1G116870.4	1257
		HORVU5Hr1G117480.3	1258
		HORVU5Hr1G117900.1	1259
		HORVU5Hr1G117910.3	1260
		HORVU5Hr1G117970.2	1261
		HORVU5Hr1G118010.1	1262
		HORVU5Hr1G118800.4	1263
		HORVU5Hr1G119180.1	1264
		HORVU5Hr1G119370.2	1265
		HORVU5Hr1G119700.1;HORVU5Hr1G119470.2	1266
		HORVU5Hr1G119810.5	1267
		HORVU5Hr1G119820.1;HORVU2Hr1G029000.2	1268
		HORVU5Hr1G120230.3	1269
		HORVU5Hr1G121060.1	1270
		HORVU5Hr1G121900.1;HORVU0Hr1G007380.3	1271
		HORVU5Hr1G122070.1	1272
		HORVU5Hr1G122150.2	1273
		HORVU5Hr1G122340.3	1274
		HORVU5Hr1G122350.2	1275
		HORVU5Hr1G122560.1;HORVU5Hr1G122430.1	1276
		HORVU5Hr1G122820.4	1277
		HORVU5Hr1G123590.1	1278
		HORVU5Hr1G123700.7	1279
		HORVU5Hr1G124350.1	1280
		HORVU5Hr1G124410.12	1281
		HORVU5Hr1G124630.3	1282
		HORVU5Hr1G124770.13	1283
		HORVU5Hr1G124850.11	1284
		HORVU5Hr1G125130.1	1285
		HORVU6Hr1G001670.1	1286
		HORVU6Hr1G003470.2;HORVU7Hr1G089290.4;HORVU7Hr1G010790.1	1287
		HORVU6Hr1G003770.1	1288
		HORVU6Hr1G003890.3	1289
		HORVU6Hr1G004350.3	1290
		HORVU6Hr1G006480.9	1291
		HORVU6Hr1G006880.1	1292
		HORVU6Hr1G008880.1	1293
		HORVU6Hr1G009380.2	1294
		HORVU6Hr1G009430.2;HORVU7Hr1G021590.2	1295
		HORVU6Hr1G011120.1	1296
		HORVU6Hr1G011140.1	1297
		HORVU6Hr1G012010.1	1298
		HORVU6Hr1G012510.5	1299
		HORVU6Hr1G012570.2;HORVU6Hr1G092950.1	1300
		HORVU6Hr1G012700.1	1301
		HORVU6Hr1G013700.1	1302
		HORVU6Hr1G013710.1	1303
		HORVU6Hr1G013800.2	1304
		HORVU6Hr1G013950.5	1305
		HORVU6Hr1G014610.3	1306
		HORVU6Hr1G014860.1	1307
		HORVU6Hr1G015130.1	1308
		HORVU6Hr1G015500.1;HORVU2Hr1G012830.1	1309
		HORVU6Hr1G016460.7	1310
		HORVU6Hr1G016750.9	1311
		HORVU6Hr1G017500.1	1312
		HORVU6Hr1G018370.1	1313
		HORVU6Hr1G018420.3	1314
		HORVU6Hr1G019130.1	1315
		HORVU6Hr1G019520.1	1316
		HORVU6Hr1G019540.3	1317
		HORVU6Hr1G019670.1	1318
		HORVU6Hr1G019840.3	1319
		HORVU6Hr1G020750.2;HORVU6Hr1G020740.1	1320
		HORVU6Hr1G020910.1	1321
		HORVU6Hr1G021020.1	1322
		HORVU6Hr1G021520.1	1323
		HORVU6Hr1G021750.1;HORVU7Hr1G098170.7	1324
		HORVU6Hr1G022170.1	1325
		HORVU6Hr1G022220.1	1326
		HORVU6Hr1G024100.1	1327
		HORVU6Hr1G024770.2	1328
		HORVU6Hr1G025270.1	1329
		HORVU6Hr1G026810.3	1330
		HORVU6Hr1G027650.12	1331
		HORVU6Hr1G028050.1	1332
		HORVU6Hr1G028710.1	1333
		HORVU6Hr1G029290.9	1334
		HORVU6Hr1G030390.2	1335
		HORVU6Hr1G030940.1	1336
		HORVU6Hr1G031830.4;HORVU7Hr1G108230.7	1337
		HORVU6Hr1G032670.1	1338
		HORVU6Hr1G032800.8	1339
		HORVU6Hr1G033060.1	1340
		HORVU6Hr1G033350.1	1341
		HORVU6Hr1G034650.1	1342
		HORVU6Hr1G035190.1	1343
		HORVU6Hr1G035420.6;HORVU6Hr1G035410.2	1344
		HORVU6Hr1G035610.5	1345
		HORVU6Hr1G036640.14	1346
		HORVU6Hr1G036660.13	1347
		HORVU7Hr1G084550.2;HORVU6Hr1G036990.7	1348
		HORVU6Hr1G037610.3	1349
		HORVU6Hr1G038710.1;HORVU7Hr1G085870.2	1350
		HORVU6Hr1G038770.1	1351
		HORVU6Hr1G039140.3	1352
		HORVU6Hr1G039910.5	1353
		HORVU6Hr1G040220.1	1354
		HORVU6Hr1G041750.3	1355
		HORVU6Hr1G042330.1	1356
		HORVU6Hr1G043010.3	1357
		HORVU6Hr1G045130.3	1358
		HORVU6Hr1G045250.3	1359
		HORVU6Hr1G047360.5;HORVU2Hr1G119280.1;REV__HORVU1Hr1G086360.3	1360
		HORVU6Hr1G048780.2	1361
		HORVU6Hr1G050970.4;HORVU7Hr1G095720.2	1362
		HORVU6Hr1G051210.1	1363
		HORVU6Hr1G051470.1;HORVU5Hr1G071600.3	1364
		HORVU6Hr1G051930.3	1365
		HORVU6Hr1G052600.3	1366
		HORVU6Hr1G053650.1	1367
		HORVU6Hr1G053680.5	1368
		HORVU6Hr1G054000.4	1369
		HORVU6Hr1G054100.2	1370
		HORVU6Hr1G054520.3	1371
		HORVU6Hr1G055460.11	1372
		HORVU6Hr1G056180.4	1373
		HORVU6Hr1G056230.2	1374
		HORVU6Hr1G058210.1	1375
		HORVU6Hr1G058560.1;HORVU2Hr1G089090.1;HORVU2Hr1G089070.1	1376
		HORVU6Hr1G058570.2	1377
		HORVU6Hr1G058750.3	1378
		HORVU6Hr1G058820.1;HORVU3Hr1G005330.2	1379
		HORVU6Hr1G058930.1	1380
		HORVU6Hr1G059730.4	1381
		HORVU6Hr1G061010.2	1382
		HORVU6Hr1G061420.1	1383
		HORVU6Hr1G062360.2	1384
		HORVU6Hr1G062440.1	1385
		HORVU6Hr1G063490.2	1386
		HORVU6Hr1G063570.1;HORVU6Hr1G063560.1;HORVU6Hr1G063540.3	1387
		HORVU6Hr1G063830.1	1388
		HORVU6Hr1G063860.1;HORVU2Hr1G048510.1	1389
		HORVU6Hr1G064620.1	1390
		HORVU6Hr1G065690.2	1391
		HORVU6Hr1G066920.1	1392
		HORVU6Hr1G066930.19	1393
		HORVU6Hr1G068750.3	1394
		HORVU6Hr1G069370.1	1395
		HORVU6Hr1G069920.5	1396
		HORVU6Hr1G070120.1	1397
		HORVU6Hr1G070270.5	1398
		HORVU6Hr1G070560.1	1399
		HORVU6Hr1G070600.4	1400
		HORVU6Hr1G070780.1	1401
		HORVU6Hr1G070790.6	1402
		HORVU6Hr1G071190.3	1403
		HORVU6Hr1G071910.3	1404
		HORVU6Hr1G072040.2	1405
		HORVU6Hr1G072320.1	1406
		HORVU6Hr1G072510.1	1407
		HORVU6Hr1G073730.1	1408
		HORVU6Hr1G073990.1	1409
		HORVU6Hr1G074030.1	1410
		HORVU6Hr1G074200.1	1411
		HORVU6Hr1G074440.1	1412
		HORVU6Hr1G074940.1	1413
		HORVU6Hr1G075010.9	1414
		HORVU6Hr1G075510.1	1415
		HORVU6Hr1G076190.1	1416
		HORVU6Hr1G076310.2	1417
		HORVU6Hr1G076660.4	1418
		HORVU6Hr1G077000.1;HORVU6Hr1G076930.1	1419
		HORVU6Hr1G077340.1	1420
		HORVU6Hr1G077770.1	1421
		HORVU6Hr1G077890.4	1422
		HORVU6Hr1G079030.4;HORVU6Hr1G079020.2	1423
		HORVU6Hr1G079140.1	1424
		HORVU6Hr1G080160.1;HORVU6Hr1G080120.1	1425
		HORVU6Hr1G080480.1;HORVU2Hr1G078800.1;HORVU4Hr1G061260.1	1426
		HORVU6Hr1G080500.1	1427
		HORVU6Hr1G080750.4	1428
		HORVU6Hr1G080800.2	1429
		HORVU6Hr1G081000.3	1430
		HORVU6Hr1G081460.2	1431
		HORVU6Hr1G081850.3	1432
		HORVU6Hr1G083150.1;HORVU7Hr1G032070.1	1433
		HORVU6Hr1G083650.3	1434
		HORVU6Hr1G083840.4;HORVU7Hr1G031320.1	1435
		HORVU6Hr1G083930.3	1436
		HORVU6Hr1G084590.3	1437
		HORVU6Hr1G084640.1	1438
		HORVU6Hr1G084960.1;HORVU5Hr1G123620.1	1439
		HORVU6Hr1G085870.1	1440
		HORVU6Hr1G085890.2	1441
		HORVU6Hr1G086590.1	1442
		HORVU6Hr1G087000.1	1443
		HORVU6Hr1G087460.1;HORVU4Hr1G013990.1;HORVU2Hr1G070680.1	1444
		HORVU6Hr1G087650.1	1445
		HORVU6Hr1G088160.5	1446
		HORVU6Hr1G088300.1	1447
		HORVU6Hr1G088430.1	1448
		HORVU6Hr1G088540.1;HORVU6Hr1G088470.1	1449
		HORVU6Hr1G089510.1;HORVU6Hr1G089450.1	1450
		HORVU6Hr1G089570.2	1451
		HORVU6Hr1G089780.1	1452
		HORVU6Hr1G090260.1	1453
		HORVU6Hr1G090510.2	1454
		HORVU6Hr1G090720.1	1455
		HORVU6Hr1G090810.1;HORVU6Hr1G090960.3;HORVU2Hr1G071960.2	1456
		HORVU6Hr1G091130.9	1457
		HORVU6Hr1G091250.1	1458
		HORVU6Hr1G091690.4	1459
		HORVU6Hr1G091860.1;HORVU7Hr1G108780.2	1460
		HORVU6Hr1G092780.2	1461
		HORVU6Hr1G092840.2	1462
		HORVU6Hr1G093230.2	1463
		HORVU6Hr1G093360.11	1464
		HORVU6Hr1G094460.4	1465
		HORVU7Hr1G000150.1	1466
		HORVU7Hr1G000250.3	1467
		HORVU7Hr1G000260.2	1468
		HORVU7Hr1G001330.9	1469
		HORVU7Hr1G002110.5	1470
		HORVU7Hr1G002560.5	1471
		HORVU7Hr1G002820.16	1472
		HORVU7Hr1G003710.1	1473
		HORVU7Hr1G006160.4	1474
		HORVU7Hr1G007610.1	1475
		HORVU7Hr1G008320.2;HORVU7Hr1G094480.1;HORVU5Hr1G052690.1;HORVU5Hr1G052670.1;HORVU5Hr1G025280.1;HORVU6Hr1G016280.1;HORVU7Hr1G022660.2;HORVU2Hr1G030580.1;HORVU4Hr1G064920.1;HORVU6Hr1G028880.3;HORVU3Hr1G028900.1;HORVU5Hr1G054960.3;HORVU5Hr1G054920.2;HORVU3Hr1G037530.2;HORVU1Hr1G075750.1	1476
		HORVU7Hr1G009340.1	1477
		HORVU7Hr1G010250.4	1478
		HORVU7Hr1G011840.2	1479
		HORVU7Hr1G012370.1	1480
		HORVU7Hr1G013600.3;HORVU2Hr1G012790.1	1481
		HORVU7Hr1G013710.2	1482
		HORVU7Hr1G017190.1	1483
		HORVU7Hr1G018880.1	1484
		HORVU7Hr1G021430.1	1485
		HORVU7Hr1G021510.2	1486
		HORVU7Hr1G021700.1	1487
		HORVU7Hr1G021800.1;HORVU7Hr1G064820.1;HORVU7Hr1G064790.3;HORVU1Hr1G048890.3	1488
		HORVU7Hr1G021950.2;HORVU7Hr1G021820.1	1489
		HORVU7Hr1G022500.2	1490
		HORVU7Hr1G022570.1	1491
		HORVU7Hr1G023760.3	1492
		HORVU7Hr1G024350.1	1493
		HORVU7Hr1G024670.1	1494
		HORVU7Hr1G025990.1	1495
		HORVU7Hr1G026030.2	1496
		HORVU7Hr1G026140.1	1497
		HORVU7Hr1G026370.1	1498
		HORVU7Hr1G026680.5	1499
		HORVU7Hr1G027220.3	1500
		HORVU7Hr1G027760.1	1501
		HORVU7Hr1G028050.5;HORVU7Hr1G014140.4;HORVU4Hr1G034700.1	1502
		HORVU7Hr1G028590.4	1503
		HORVU7Hr1G029780.21	1504
		HORVU7Hr1G030670.1	1505
		HORVU7Hr1G031020.2	1506
		HORVU7Hr1G031850.4	1507
		HORVU7Hr1G033230.8;HORVU0Hr1G019020.1;HORVU4Hr1G049500.7	1508
		HORVU7Hr1G033370.1	1509
		HORVU7Hr1G033390.1	1510
		HORVU7Hr1G033770.3;HORVU2Hr1G077970.1	1511
		HORVU7Hr1G033900.2	1512
		HORVU7Hr1G034140.1;HORVU6Hr1G084940.1	1513
		HORVU7Hr1G034230.5;HORVU7Hr1G034270.1;HORVU7Hr1G034260.1;HORVU7Hr1G034280.1	1514
		HORVU7Hr1G034920.1;HORVU5Hr1G057400.1	1515
		HORVU7Hr1G035300.3	1516
		HORVU7Hr1G036000.9	1517
		HORVU7Hr1G036390.1	1518
		HORVU7Hr1G036460.1;HORVU1Hr1G069200.2;HORVU4Hr1G074970.4	1519
		HORVU7Hr1G037080.2	1520
		HORVU7Hr1G037420.1	1521
		HORVU7Hr1G038180.1	1522
		HORVU7Hr1G038520.6	1523
		HORVU7Hr1G038660.5;HORVU7Hr1G038690.4	1524
		HORVU7Hr1G038710.2	1525
		HORVU7Hr1G039480.3	1526
		HORVU7Hr1G039880.3	1527
		HORVU7Hr1G039890.3	1528
		HORVU7Hr1G040550.1	1529
		HORVU7Hr1G040670.7	1530
		HORVU7Hr1G041850.1	1531
		HORVU7Hr1G042100.8	1532
		HORVU7Hr1G042240.1	1533
		HORVU7Hr1G042300.1	1534
		HORVU7Hr1G042790.1	1535
		HORVU7Hr1G042880.2	1536
		HORVU7Hr1G043550.2	1537
		HORVU7Hr1G044070.2;HORVU1Hr1G052730.26	1538
		HORVU7Hr1G045240.4	1539
		HORVU7Hr1G045770.7	1540
		HORVU7Hr1G046250.2	1541
		HORVU7Hr1G046270.10	1542
		HORVU7Hr1G046280.1	1543
		HORVU7Hr1G046290.3	1544
		HORVU7Hr1G046410.5	1545
		HORVU7Hr1G046890.1	1546
		HORVU7Hr1G047700.3	1547
		HORVU7Hr1G047770.1	1548
		HORVU7Hr1G047990.1	1549
		HORVU7Hr1G048150.1	1550
		HORVU7Hr1G048470.2	1551
		HORVU7Hr1G048760.2	1552
		HORVU7Hr1G048970.7	1553
		HORVU7Hr1G049370.5	1554
		HORVU7Hr1G049860.1	1555
		HORVU7Hr1G050740.1	1556
		HORVU7Hr1G051070.2	1557
		HORVU7Hr1G051470.3	1558
		HORVU7Hr1G052090.3;HORVU4Hr1G033990.2	1559
		HORVU7Hr1G052520.1	1560
		HORVU7Hr1G052770.1	1561
		HORVU7Hr1G052960.1	1562
		HORVU7Hr1G053300.5	1563
		HORVU7Hr1G054010.1	1564
		HORVU7Hr1G054060.3	1565
		HORVU7Hr1G054380.1;HORVU7Hr1G054360.1	1566
		HORVU7Hr1G054440.1	1567
		HORVU7Hr1G054550.1	1568
		HORVU7Hr1G054690.4	1569
		HORVU7Hr1G054850.2;HORVU5Hr1G077020.1	1570
		HORVU7Hr1G055090.3	1571
		HORVU7Hr1G055340.1;HORVU2Hr1G071330.6	1572
		HORVU7Hr1G055410.2	1573
		HORVU7Hr1G055860.1	1574
		HORVU7Hr1G056470.6	1575
		HORVU7Hr1G056590.2	1576
		HORVU7Hr1G056660.1	1577
		HORVU7Hr1G056770.2	1578
		HORVU7Hr1G056910.1	1579
		HORVU7Hr1G057390.2	1580
		HORVU7Hr1G057430.1	1581
		HORVU7Hr1G057470.1	1582
		HORVU7Hr1G058060.1	1583
		HORVU7Hr1G059090.5;HORVU4Hr1G001350.5	1584
		HORVU7Hr1G059330.1;HORVU5Hr1G009100.3	1585
		HORVU7Hr1G059460.4	1586
		HORVU7Hr1G060130.2	1587
		HORVU7Hr1G060630.2	1588
		HORVU7Hr1G061850.1	1589
		HORVU7Hr1G061920.2	1590
		HORVU7Hr1G062090.1	1591
		HORVU7Hr1G063970.1	1592
		HORVU7Hr1G064020.2	1593
		HORVU7Hr1G066750.5	1594
		HORVU7Hr1G122490.1;HORVU7Hr1G067210.1;HORVU0Hr1G022870.1;HORVU0Hr1G033220.1	1595
		HORVU7Hr1G068630.1	1596
		HORVU7Hr1G069460.4	1597
		HORVU7Hr1G070150.2	1598
		HORVU7Hr1G071240.1	1599
		HORVU7Hr1G071600.2	1600
		HORVU7Hr1G071730.1;HORVU7Hr1G071760.1	1601
		HORVU7Hr1G072240.4	1602
		HORVU7Hr1G072650.1	1603
		HORVU7Hr1G073190.2	1604
		HORVU7Hr1G073220.1	1605
		HORVU7Hr1G073460.3	1606
		HORVU7Hr1G073720.5;HORVU0Hr1G038820.1	1607
		HORVU7Hr1G074270.2	1608
		HORVU7Hr1G074690.1	1609
		HORVU7Hr1G074850.3	1610
		HORVU7Hr1G074890.4	1611
		HORVU7Hr1G075240.1	1612
		HORVU7Hr1G075250.1;HORVU7Hr1G075290.1	1613
		HORVU7Hr1G075360.2	1614
		HORVU7Hr1G075760.3	1615
		HORVU7Hr1G076150.1	1616
		HORVU7Hr1G076300.2	1617
		HORVU7Hr1G076680.1	1618
		HORVU7Hr1G076780.8	1619
		HORVU7Hr1G078410.1	1620
		HORVU7Hr1G080290.2	1621
		HORVU7Hr1G080310.1	1622
		HORVU7Hr1G080510.2	1623
		HORVU7Hr1G080870.4	1624
		HORVU7Hr1G081350.3	1625
		HORVU7Hr1G081770.1	1626
		HORVU7Hr1G082220.1	1627
		HORVU7Hr1G082240.2	1628
		HORVU7Hr1G082540.2	1629
		HORVU7Hr1G083490.8	1630
		HORVU7Hr1G083550.1	1631
		HORVU7Hr1G083860.1	1632
		HORVU7Hr1G084420.5	1633
		HORVU7Hr1G084630.4	1634
		HORVU7Hr1G085150.1	1635
		HORVU7Hr1G085310.1	1636
		HORVU7Hr1G086410.1	1637
		HORVU7Hr1G086690.2	1638
		HORVU7Hr1G087050.1	1639
		HORVU7Hr1G087190.1	1640
		HORVU7Hr1G087210.1	1641
		HORVU7Hr1G087240.2	1642
		HORVU7Hr1G087940.1	1643
		HORVU7Hr1G088080.1;HORVU1Hr1G054530.14	1644
		HORVU7Hr1G089230.1	1645
		HORVU7Hr1G089300.2	1646
		HORVU7Hr1G089320.1	1647
		HORVU7Hr1G089470.2	1648
		HORVU7Hr1G089700.1	1649
		HORVU7Hr1G090380.1;HORVU6Hr1G032570.1;HORVU7Hr1G119300.13;HORVU0Hr1G021880.1;HORVU7Hr1G091480.2	1650
		HORVU7Hr1G090760.2;HORVU5Hr1G052710.6	1651
		HORVU7Hr1G090950.1	1652
		HORVU7Hr1G091100.11;HORVU1Hr1G092310.2	1653
		HORVU7Hr1G091250.3;HORVU7Hr1G091150.1;HORVU7Hr1G091240.1	1654
		HORVU7Hr1G091760.2	1655
		HORVU7Hr1G091830.1	1656
		HORVU7Hr1G092800.3	1657
		HORVU7Hr1G093020.1;HORVU6Hr1G034620.1	1658
		HORVU7Hr1G093940.1	1659
		HORVU7Hr1G095020.6	1660
		HORVU7Hr1G095960.1	1661
		HORVU7Hr1G096900.1	1662
		HORVU7Hr1G096990.2	1663
		HORVU7Hr1G097550.2	1664
		HORVU7Hr1G098110.5;HORVU1Hr1G020690.5	1665
		HORVU7Hr1G098510.11	1666
		HORVU7Hr1G100230.1	1667
		HORVU7Hr1G102480.7	1668
		HORVU7Hr1G106540.2	1669
		HORVU7Hr1G106900.1	1670
		HORVU7Hr1G108210.3;HORVU3Hr1G077580.4	1671
		HORVU7Hr1G108540.4	1672
		HORVU7Hr1G108570.1	1673
		HORVU7Hr1G110810.1;HORVU7Hr1G009480.1;HORVU7Hr1G110720.1	1674
		HORVU7Hr1G111130.3	1675
		HORVU7Hr1G112930.2	1676
		HORVU7Hr1G113110.1	1677
		HORVU7Hr1G115280.8	1678
		HORVU7Hr1G115510.1	1679
		HORVU7Hr1G116830.1	1680
		HORVU7Hr1G117000.1	1681
		HORVU7Hr1G117710.10;HORVU4Hr1G012550.1;HORVU4Hr1G076000.2;HORVU4Hr1G076050.1	1682
		HORVU7Hr1G118230.2	1683
		HORVU7Hr1G118240.1;HORVU7Hr1G118260.1;HORVU6Hr1G091060.1;HORVU4Hr1G071450.1	1684
		HORVU7Hr1G118770.1	1685
		HORVU7Hr1G119060.1	1686
		HORVU7Hr1G119590.1	1687
		HORVU7Hr1G119820.1	1688
		HORVU7Hr1G120030.4	1689
		HORVU7Hr1G120490.20	1690
		HORVU7Hr1G121120.3	1691
		HORVU7Hr1G121230.4	1692
		HORVU7Hr1G121390.3	1693
		HORVU7Hr1G121510.2	1694
		REV__HORVU6Hr1G011790.17;REV__HORVU1Hr1G070040.3;REV__HORVU2Hr1G104690.1;REV__HORVU2Hr1G104610.2;REV__HORVU7Hr1G051420.2	1695
		REV__HORVU4Hr1G056500.1	1696
		REV__HORVU5Hr1G110490.14	1697
		REV__HORVU6Hr1G021550.1	1698
		REV__HORVU6Hr1G063800.1	1699
		REV__HORVU6Hr1G069440.1	1700
		REV__HORVU7Hr1G043470.2	1701

## Sheet: S2B (LB-916)
Analysis Type: PANTHER Overrepresentation Test (Released 20190711)										http://revigo.irb.hr/
Annotation Version and Release Date: GO Ontology database Released 2019-12-09
Analyzed List: Hordeum vulgare subsp. Vulgare
Reference List: Hordeum vulgare subsp. Vulgare (all genes in database)
Test Type: FISHER
Correction: FDR
GO cellular component complete	Gene Ontology ID	FDR	Hordeum vulgare subsp. vulgare - REFLIST (35536)	upload_1 (1254)	upload_1 (expected)	upload_1 (over/under)	upload_1 (fold Enrichment)	upload_1 (raw P-value)
nucleolus	GO:0005730	0.00701	72	7	0.96	+	7.26	8.61e-05
intracellular membrane-bounded organelle	GO:0043231	0.00667	3723	79	49.87	+	1.58	6.14e-05
intracellular organelle	GO:0043229	0.0275	4423	86	59.25	+	1.45	0.000465
organelle	GO:0043226	0.0296	4466	86	59.82	+	1.44	0.000636
cellular anatomical entity	GO:0110165	0.0255	11010	184	147.48	+	1.25	0.00047
intracellular	GO:0005622	2.04e-05	5137	114	68.81	+	1.66	6.27e-08
membrane-bounded organelle	GO:0043227	0.00728	3834	80	51.36	+	1.56	7.83e-05
cytosol	GO:0005829	0.00482	270	14	3.62	+	3.87	2.96e-05
cytoplasm	GO:0005737	7.03e-10	2306	76	30.89	+	2.46	1.08e-12
mitochondrion	GO:0005739	0.00514	457	19	6.12	+	3.1	2.37e-05
bounding membrane of organelle	GO:0098588	0.0372	294	12	3.94	+	3.05	0.000856
organelle membrane	GO:0031090	0.00608	568	21	7.61	+	2.76	4.67e-05
protein-containing complex	GO:0032991	0.0236	1379	35	18.47	+	1.89	0.000471

## Sheet: S2C (REB-1125)
Analysis Type: PANTHER Overrepresentation Test (Released 20190711)										http://revigo.irb.hr/
Annotation Version and Release Date: GO Ontology database Released 2019-12-09
Analyzed List: Hordeum vulgare subsp. Vulgare
Reference List: Hordeum vulgare subsp. Vulgare (all genes in database)
Test Type: FISHER
Correction: FDR
GO cellular component complete	Gene Ontology ID	FDR	Hordeum vulgare subsp. vulgare - REFLIST (35536)	upload_1 (1254)	upload_1 (expected)	upload_1 (over/under)	upload_1 (fold Enrichment)	upload_1 (raw P-value)
COPII vesicle coat	GO:0030127	0.0394	10	3	0.17	+	17.45	0.00121
membrane-bounded organelle	GO:0043227	0.000138	3834	106	65.92	+	1.61	1.48e-06
organelle	GO:0043226	4.01e-05	4466	122	76.79	+	1.59	3.08e-07
cellular anatomical entity	GO:0110165	0.0382	11010	228	189.3	+	1.2	0.000938
intracellular organelle	GO:0043229	0.000109	4423	119	76.05	+	1.56	1e-06
intracellular	GO:0005622	2.58e-05	5137	138	88.32	+	1.56	1.19e-07
cytoplasm	GO:0005737	4.22e-11	2306	93	39.65	+	2.35	6.48e-14
membrane coat	GO:0030117	0.04	63	6	1.08	+	5.54	0.00111
coated membrane	GO:0048475	0.0379	63	6	1.08	+	5.54	0.00111
protein-containing complex	GO:0032991	0.0387	1379	41	23.71	+	1.73	0.00101
ER to Golgi transport vesicle membrane	GO:0012507	0.045	11	3	0.19	+	15.86	0.00152
endomembrane system	GO:0012505	2.36e-05	565	30	9.71	+	3.09	1.45e-07
COPII-coated ER to Golgi transport vesicle	GO:0030134	0.0472	11	3	0.19	+	15.86	0.00152
endoplasmic reticulum	GO:0005783	6.92e-06	191	18	3.28	+	5.48	2.13e-08
intracellular membrane-bounded organelle	GO:0043231	0.000469	3723	101	64.01	+	1.58	5.76e-06
endoplasmic reticulum membrane	GO:0005789	0.000484	132	12	2.27	+	5.29	6.68e-06
nuclear outer membrane-endoplasmic reticulum membrane network	GO:0042175	0.000467	133	12	2.29	+	5.25	7.18e-06
vacuole	GO:0005773	0.00184	132	11	2.27	+	4.85	3.4e-05
cytosol	GO:0005829	0.000559	270	17	4.64	+	3.66	9.45e-06
mitochondrion	GO:0005739	0.0107	457	20	7.86	+	2.55	0.000214

## Sheet: S2D (Common-1700)
Analysis Type: PANTHER Overrepresentation Test (Released 20190711)										http://revigo.irb.hr/
Annotation Version and Release Date: GO Ontology database Released 2019-12-09
Analyzed List: Hordeum vulgare subsp. Vulgare
Reference List: Hordeum vulgare subsp. Vulgare (all genes in database)
Test Type: FISHER
Correction: FDR
GO cellular component complete	Gene Ontology ID	FDR	Hordeum vulgare subsp. vulgare - REFLIST (35536)	upload_1 (1254)	upload_1 (expected)	upload_1 (over/under)	upload_1 (fold Enrichment)	upload_1 (raw P-value)
tricarboxylic acid cycle enzyme complex	GO:0045239	0.0425	2	2	0.07	+	28.34	0.00665
cytoplasm	GO:0005737	7.06e-71	2306	286	81.37	+	3.51	1.08e-73
cellular anatomical entity	GO:0110165	3.02e-09	11010	499	388.52	+	1.28	1.02e-10
intracellular	GO:0005622	9.89e-36	5137	363	181.28	+	2	4.56e-38
protein-containing complex	GO:0032991	4.46e-11	1379	106	48.66	+	2.18	8.9e-13
eukaryotic translation elongation factor 1 complex	GO:0005853	0.0421	2	2	0.07	+	28.34	0.00665
pyruvate dehydrogenase complex	GO:0045254	0.0416	2	2	0.07	+	28.34	0.00665
oxidoreductase complex	GO:1990204	9.37e-06	48	12	1.69	+	7.08	7.2e-07
catalytic complex	GO:1902494	1.25e-06	306	33	10.8	+	3.06	8.06e-08
cytosolic large ribosomal subunit	GO:0022625	0.00978	4	3	0.14	+	21.25	0.00125
cytosolic ribosome	GO:0022626	0.00301	14	5	0.49	+	10.12	0.000356
ribosome	GO:0005840	2.58e-08	498	49	17.57	+	2.79	1.07e-09
intracellular non-membrane-bounded organelle	GO:0043232	9.9e-08	990	75	34.94	+	2.15	4.87e-09
intracellular organelle	GO:0043229	1.67e-16	4423	270	156.08	+	1.73	1.54e-18
organelle	GO:0043226	1.89e-16	4466	272	157.6	+	1.73	1.45e-18
non-membrane-bounded organelle	GO:0043228	9.6e-08	990	75	34.94	+	2.15	4.87e-09
cytosol	GO:0005829	2.37e-38	270	78	9.53	+	8.19	7.27e-41
large ribosomal subunit	GO:0015934	0.000387	40	9	1.41	+	6.38	3.63e-05
ribosomal subunit	GO:0044391	1.82e-05	85	15	3	+	5	1.51e-06
ribonucleoprotein complex	GO:1990904	2.74e-09	198	31	6.99	+	4.44	7.16e-11
cytoplasmic side of membrane	GO:0098562	0.00967	4	3	0.14	+	21.25	0.00125
side of membrane	GO:0098552	0.0131	5	3	0.18	+	17	0.00195
membrane	GO:0016020	0.0107	6690	192	236.08	-	0.81	0.00152
MCM complex	GO:0042555	0.0021	6	4	0.21	+	18.89	0.000239
mitochondrial respiratory chain complex I	GO:0005747	6.8e-05	9	6	0.32	+	18.89	5.95e-06
mitochondrial respirasome	GO:0005746	1.44e-05	17	8	0.6	+	13.34	1.15e-06
mitochondrial inner membrane	GO:0005743	5.99e-08	119	22	4.2	+	5.24	2.76e-09
mitochondrial membrane	GO:0031966	2.66e-09	160	28	5.65	+	4.96	6.12e-11
mitochondrial envelope	GO:0005740	2.83e-09	173	29	6.1	+	4.75	6.96e-11
mitochondrion	GO:0005739	1.59e-19	457	69	16.13	+	4.28	9.79e-22
intracellular membrane-bounded organelle	GO:0043231	4.81e-08	3723	202	131.38	+	1.54	2.14e-09
membrane-bounded organelle	GO:0043227	2.58e-08	3834	208	135.29	+	1.54	1.11e-09
organelle envelope	GO:0031967	6.42e-09	320	39	11.29	+	3.45	2.37e-10
envelope	GO:0031975	6.7e-09	320	39	11.29	+	3.45	2.37e-10
organelle membrane	GO:0031090	2.62e-14	568	67	20.04	+	3.34	3.62e-16
organelle inner membrane	GO:0019866	1.67e-07	128	22	4.52	+	4.87	8.98e-09
respirasome	GO:0070469	0.00122	73	11	2.58	+	4.27	0.000132
respiratory chain complex I	GO:0045271	0.000102	10	6	0.35	+	17	9.25e-06
respiratory chain complex	GO:0098803	1.8e-05	25	9	0.88	+	10.2	1.47e-06
membrane protein complex	GO:0098796	1.89e-06	394	38	13.9	+	2.73	1.25e-07
NADH dehydrogenase complex	GO:0030964	0.000104	10	6	0.35	+	17	9.25e-06
inner mitochondrial membrane protein complex	GO:0098800	3.99e-06	53	13	1.87	+	6.95	3.01e-07
mitochondrial protein complex	GO:0098798	3.45e-06	62	14	2.19	+	6.4	2.54e-07
stromule	GO:0010319	0.0132	5	3	0.18	+	17	0.00195
plastid	GO:0009536	0.0014	637	43	22.48	+	1.91	0.000154
eukaryotic 48S preinitiation complex	GO:0033290	2.4e-06	18	9	0.64	+	14.17	1.62e-07
translation preinitiation complex	GO:0070993	2.3e-06	18	9	0.64	+	14.17	1.62e-07
eukaryotic 43S preinitiation complex	GO:0016282	2.35e-06	18	9	0.64	+	14.17	1.62e-07
plant-type cell wall	GO:0009505	0.00611	9	4	0.32	+	12.59	0.00075
cell periphery	GO:0071944	1.05e-06	569	49	20.08	+	2.44	6.31e-08
eukaryotic translation initiation factor 3 complex	GO:0005852	1.06e-05	23	9	0.81	+	11.09	8.34e-07
THO complex	GO:0000347	0.01	11	4	0.39	+	10.3	0.00136
proton-transporting V-type ATPase, V1 domain	GO:0033180	0.0424	9	3	0.32	+	9.45	0.0069
proton-transporting V-type ATPase complex	GO:0033176	0.00739	18	5	0.64	+	7.87	0.00092
proton-transporting two-sector ATPase complex	GO:0016469	0.000748	68	11	2.4	+	4.58	7.47e-05
proton-transporting two-sector ATPase complex, catalytic domain	GO:0033178	0.00855	29	6	1.02	+	5.86	0.00108
plasmodesma	GO:0009506	2.6e-09	67	19	2.36	+	8.04	7.19e-11
cell-cell junction	GO:0005911	2.46e-09	67	19	2.36	+	8.04	7.19e-11
cell junction	GO:0030054	2.23e-09	67	19	2.36	+	8.04	7.19e-11
symplast	GO:0055044	2.34e-09	67	19	2.36	+	8.04	7.19e-11
mitochondrial proton-transporting ATP synthase complex	GO:0005753	0.01	20	5	0.71	+	7.08	0.00137
mitochondrial outer membrane	GO:0005741	0.00993	20	5	0.71	+	7.08	0.00137
organelle outer membrane	GO:0031968	0.00962	30	6	1.06	+	5.67	0.00126
outer membrane	GO:0019867	0.00416	35	7	1.24	+	5.67	0.000499
whole membrane	GO:0098805	1.83e-11	189	34	6.67	+	5.1	2.81e-13
bounding membrane of organelle	GO:0098588	7.92e-09	294	37	10.37	+	3.57	3.04e-10
proteasome core complex	GO:0005839	0.00541	26	6	0.92	+	6.54	0.000656
proteasome complex	GO:0000502	1.06e-06	37	12	1.31	+	9.19	6.71e-08
endopeptidase complex	GO:1905369	1.09e-06	37	12	1.31	+	9.19	6.71e-08
peptidase complex	GO:1905368	2.85e-06	51	13	1.8	+	7.22	2.06e-07
vacuolar membrane	GO:0005774	5.03e-07	80	17	2.82	+	6.02	2.93e-08
vacuole	GO:0005773	2.75e-10	132	27	4.66	+	5.8	5.92e-12
vesicle coat	GO:0030120	0.000705	44	9	1.55	+	5.8	6.93e-05
coated vesicle membrane	GO:0030662	0.00105	47	9	1.66	+	5.43	0.000108
cytoplasmic vesicle membrane	GO:0030659	0.00267	55	9	1.94	+	4.64	0.000308
vesicle membrane	GO:0012506	0.00297	56	9	1.98	+	4.55	0.000347
coated vesicle	GO:0030135	0.00161	63	10	2.22	+	4.5	0.000181
membrane coat	GO:0030117	0.000424	63	11	2.22	+	4.95	4.04e-05
coated membrane	GO:0048475	0.000417	63	11	2.22	+	4.95	4.04e-05
Golgi-associated vesicle membrane	GO:0030660	0.000922	46	9	1.62	+	5.54	9.35e-05
Golgi-associated vesicle	GO:0005798	0.00117	48	9	1.69	+	5.31	0.000124
transport vesicle membrane	GO:0030658	0.0104	31	6	1.09	+	5.48	0.00146
transport vesicle	GO:0030133	0.0132	33	6	1.16	+	5.15	0.00193
endomembrane system	GO:0012505	4.97e-07	565	50	19.94	+	2.51	2.82e-08
chloroplast stroma	GO:0009570	7.48e-08	157	25	5.54	+	4.51	3.56e-09
chloroplast	GO:0009507	0.00125	622	42	21.95	+	1.91	0.000136
plastid stroma	GO:0009532	9.59e-08	160	25	5.65	+	4.43	5.01e-09
peroxisome	GO:0005777	0.00979	55	8	1.94	+	4.12	0.00131
microbody	GO:0042579	0.00991	55	8	1.94	+	4.12	0.00131
small ribosomal subunit	GO:0015935	0.0459	45	6	1.59	+	3.78	0.00754
microtubule	GO:0005874	0.0122	72	9	2.54	+	3.54	0.00174
microtubule cytoskeleton	GO:0015630	0.0269	83	9	2.93	+	3.07	0.00417
cytoskeleton	GO:0005856	0.000257	138	17	4.87	+	3.49	2.37e-05
polymeric cytoskeletal fiber	GO:0099513	0.0136	74	9	2.61	+	3.45	0.00207
supramolecular fiber	GO:0099512	0.0135	74	9	2.61	+	3.45	0.00207
supramolecular polymer	GO:0099081	0.0137	74	9	2.61	+	3.45	0.00207
supramolecular complex	GO:0099080	0.0418	90	9	3.18	+	2.83	0.00674
plasma membrane	GO:0005886	3.91e-07	350	37	12.35	+	3	2.16e-08
Golgi apparatus	GO:0005794	4.25e-05	267	27	9.42	+	2.87	3.59e-06
cell	GO:0005623	5.04e-05	270	27	9.53	+	2.83	4.34e-06
endoplasmic reticulum	GO:0005783	0.00111	191	19	6.74	+	2.82	0.000116
extracellular region	GO:0005576	1.25e-08	552	53	19.48	+	2.72	4.98e-10
integral component of membrane	GO:0016021	5.61e-16	5940	103	209.61	-	0.49	6.03e-18
intrinsic component of membrane	GO:0031224	1e-15	5952	104	210.04	-	0.5	1.23e-17
chromosome	GO:0005694	0.0128	261	1	9.21	-	0.11	0.00185
