# Supplementary material for: Membrane-Enriched Proteomics Link Ribosome Accumulation and Proteome Reprogramming With Cold Acclimation in Barley Root Meristems
Source: Front Plant Sci. 2021 Apr 30;12:656683. doi: 10.3389/fpls.2021.656683 (PMC8121087; doi:10.3389/fpls.2021.656683)
Supplement: Supplementary file 3 [file Table_3.XLSX]

## Sheet: Legend
Supplementary Table 3. Bicinchoninic acid (BCA) assay results of tests conducted on the purified Hordeum vulgare root proteome. Related to Figure 3; Figure 4; Supplementary Figure 5. BCA was done right after protein precipitation, cleaning and resuspension (S3A & B) and of tryptic peptides after reduction, alkylation and trypsin digestion (S3C). Ribosomal protein content was measured after riboso…

## Sheet: S3A (BCA_1-20)
User: USER
Test ID: 6913
Test Name: Federico BCA
Date: 10/03/2020
Time: 2:42:08 PM
Absorbance			Absorbance values are displayed as OD
	1. Raw Data (562)
	1	2	3	4	5	6	7	8	9	10	11	12
A	0.941	1.021	0.994	0.451	0.291	0.363	0.293	0.199	0.229	0.25	0.213	0.159
B	0.783	0.768	0.789	0.403	0.301	0.336	0.304	0.2	0.237	0.245	0.217	0.161
C	0.546	0.558	0.555	0.396	0.29	0.321	0.306	0.582	0.243	0.25	0.218	0.156
D	0.503	0.504	0.502	0.171	0.147	0.209	0.263	0.175	0.174	0.23	0.202	0.197
E	0.325	0.333	0.331	0.169	0.143	0.225	0.244	0.189	0.172	0.232	0.2	0.203
F	0.214	0.22	0.219	0.171	0.152	0.218	0.254	0.17	0.179	0.236	0.226	0.205
G	0.147	0.158	0.155	0.084	0.183	0.192	0.081	0.078	0.077
H	0.086	0.085	0.084	0.084	0.083	0.193	0.084	0.082	0.083
	2. Blank corrected based on Raw Data (562)
	1	2	3	4	5	6	7	8	9	10	11	12		Average of all blanks used
A	0.858	0.938	0.91	0.368	0.208	0.279	0.21	0.116	0.146	0.166	0.13	0.076
B	0.7	0.685	0.706	0.319	0.218	0.253	0.221	0.117	0.154	0.162	0.134	0.078
C	0.463	0.475	0.472	0.313	0.207	0.238	0.223	0.498	0.16	0.167	0.135	0.073
D	0.42	0.421	0.419	0.088	0.064	0.126	0.18	0.092	0.091	0.147	0.118	0.114
E	0.241	0.25	0.247	0.086	0.06	0.142	0.161	0.106	0.089	0.149	0.117	0.12
F	0.131	0.137	0.136	0.088	0.069	0.135	0.17	0.087	0.096	0.153	0.143	0.122
G	0.064	0.075	0.072	0.0005	0.1	0.109	-0.002	-0.005	-0.006
H	0.003	0.002	0.001	0.001	0.0001	0.11
	3. Average over replicates based on Blank corrected (562)
	1	2	3	4	5	6	7	8	9	10	11	12
A	0.902	0.902	0.902	0.333	0.211	0.257	0.218	0.244	0.153	0.165	0.133	0.076
B	0.697	0.697	0.697	0.333	0.211	0.257	0.218	0.244	0.153	0.165	0.133	0.076
C	0.47	0.47	0.47	0.333	0.211	0.257	0.218	0.244	0.153	0.165	0.133	0.076
D	0.42	0.42	0.42	0.087	0.064	0.134	0.17	0.095	0.092	0.15	0.126	0.118
E	0.246	0.246	0.246	0.087	0.064	0.134	0.17	0.095	0.092	0.15	0.126	0.118
F	0.134	0.134	0.134	0.087	0.064	0.134	0.17	0.095	0.092	0.15	0.126	0.118
G	0.07	0.07	0.07	0.0006	0.106	0.106	-0.005	-0.005	-0.005
H	0.002	0.002	0.002	0.0006	0.0006	0.106
	4. Linear regression fit based on Blank corrected (562)
	1	2	3	4	5	6	7	8	9	10	11	12
A	1856.18	2033.71	1972.9	6153.92	3308.09	4582.77	3347.14	1683.67	2203.84	2576.66	1923.34	973.544
B	1504.89	1473.38	1518.65	5291.12	3492.72	4103.43	3547.76	1690.77	2361.84	2503.87	2003.23	1001.95
C	980.725	1006.91	999.144	5172.17	3288.56	3840.68	3576.16	8470.71	2468.36	2587.31	2015.66	920.285
D	884.858	887.299	883.082	1188.36	758.731	1848.78	2818.1	1261.15	1227.41	2225.14	1722.73	1637.51
E	488.296	507.381	501.833	1142.2	680.617	2139.93	2473.69	1497.26	1202.56	2258.87	1696.1	1745.81
F	242.858	256.839	253.288	1183.03	847.497	2008.55	2647.67	1159.95	1323.28	2342.31	2161.23	1781.31
G	95.507	119.03	111.929	-370.371	1396.07	1548.75	-52.288	-58.502	-61.83
H	-40.749	-43.411	-44.521	-357.944	-377.472	1577.15
																				Formula:	Y = Slope * x + Offset
																					Fit results are based on OD values
																				Wavelength:	Slope	0.000450624
																				562	Offset	0.0213622
																					r	0.996324
																					r²	0.992662
Well Row	Well Col	Content	Raw Data (562)	Blank corrected based on Raw Data (562)	Average over replicates based on Blank corrected (562)	Linear regression fit based on Blank corrected (562)
H	7	Blank B	0.084
H	8	Blank B	0.082
H	9	Blank B	0.083
G	7	Negative control N	0.081	-0.002	-0.005	-52.288
G	8	Negative control N	0.078	-0.005	-0.005	-58.502
G	9	Negative control N	0.077	-0.006	-0.005	-61.83
A	4	Sample X11	0.451	0.368	0.333	6153.92
B	4	Sample X11	0.403	0.319	0.333	5291.12
C	4	Sample X11	0.396	0.313	0.333	5172.17
A	5	Sample X13	0.291	0.208	0.211	3308.09
B	5	Sample X13	0.301	0.218	0.211	3492.72
C	5	Sample X13	0.29	0.207	0.211	3288.56
A	6	Sample X15	0.363	0.279	0.257	4582.77
B	6	Sample X15	0.336	0.253	0.257	4103.43
C	6	Sample X15	0.321	0.238	0.257	3840.68
A	8	Sample X19	0.199	0.116	0.244	1683.67
B	8	Sample X19	0.2	0.117	0.244	1690.77
C	8	Sample X19	0.582	0.498	0.244	8470.71
A	7	Sample X21	0.293	0.21	0.218	3347.14
B	7	Sample X21	0.304	0.221	0.218	3547.76
C	7	Sample X21	0.306	0.223	0.218	3576.16
A	9	Sample X23	0.229	0.146	0.153	2203.84
B	9	Sample X23	0.237	0.154	0.153	2361.84
C	9	Sample X23	0.243	0.16	0.153	2468.36
A	10	Sample X24	0.25	0.166	0.165	2576.66
B	10	Sample X24	0.245	0.162	0.165	2503.87
C	10	Sample X24	0.25	0.167	0.165	2587.31
A	11	Sample X26	0.213	0.13	0.133	1923.34
B	11	Sample X26	0.217	0.134	0.133	2003.23
C	11	Sample X26	0.218	0.135	0.133	2015.66
A	12	Sample X28	0.159	0.076	0.076	973.544
B	12	Sample X28	0.161	0.078	0.076	1001.95
C	12	Sample X28	0.156	0.073	0.076	920.285
D	4	Sample X29	0.171	0.088	0.087	1188.36
E	4	Sample X29	0.169	0.086	0.087	1142.2
F	4	Sample X29	0.171	0.088	0.087	1183.03
D	5	Sample X30	0.147	0.064	0.064	758.731
E	5	Sample X30	0.143	0.06	0.064	680.617
F	5	Sample X30	0.152	0.069	0.064	847.497
D	6	Sample X31	0.209	0.126	0.134	1848.78
E	6	Sample X31	0.225	0.142	0.134	2139.93
F	6	Sample X31	0.218	0.135	0.134	2008.55
D	7	Sample X32	0.263	0.18	0.17	2818.1
E	7	Sample X32	0.244	0.161	0.17	2473.69
F	7	Sample X32	0.254	0.17	0.17	2647.67
D	8	Sample X33	0.175	0.092	0.095	1261.15
E	8	Sample X33	0.189	0.106	0.095	1497.26
F	8	Sample X33	0.17	0.087	0.095	1159.95
D	9	Sample X34	0.174	0.091	0.092	1227.41
E	9	Sample X34	0.172	0.089	0.092	1202.56
F	9	Sample X34	0.179	0.096	0.092	1323.28
D	10	Sample X35	0.23	0.147	0.15	2225.14
E	10	Sample X35	0.232	0.149	0.15	2258.87
F	10	Sample X35	0.236	0.153	0.15	2342.31
D	11	Sample X36	0.202	0.118	0.126	1722.73
E	11	Sample X36	0.2	0.117	0.126	1696.1
F	11	Sample X36	0.226	0.143	0.126	2161.23
D	12	Sample X37	0.197	0.114	0.118	1637.51
E	12	Sample X37	0.203	0.12	0.118	1745.81
F	12	Sample X37	0.205	0.122	0.118	1781.31
G	4	Sample X38	0.084	0.0005	0.0006	-370.371
H	4	Sample X38	0.084	0.001	0.0006	-357.944
H	5	Sample X38	0.083	0.0001	0.0006	-377.472
G	5	Sample X39	0.183	0.1	0.106	1396.07
G	6	Sample X39	0.192	0.109	0.106	1548.75
H	6	Sample X39	0.193	0.11	0.106	1577.15
A	1	Standard S1	0.941	0.858	0.902	1856.18
A	2	Standard S1	1.021	0.938	0.902	2033.71
A	3	Standard S1	0.994	0.91	0.902	1972.9
B	1	Standard S2	0.783	0.7	0.697	1504.89
B	2	Standard S2	0.768	0.685	0.697	1473.38
B	3	Standard S2	0.789	0.706	0.697	1518.65
C	1	Standard S3	0.546	0.463	0.47	980.725
C	2	Standard S3	0.558	0.475	0.47	1006.91
C	3	Standard S3	0.555	0.472	0.47	999.144
D	1	Standard S4	0.503	0.42	0.42	884.858
D	2	Standard S4	0.504	0.421	0.42	887.299
D	3	Standard S4	0.502	0.419	0.42	883.082
E	1	Standard S5	0.325	0.241	0.246	488.296
E	2	Standard S5	0.333	0.25	0.246	507.381
E	3	Standard S5	0.331	0.247	0.246	501.833
F	1	Standard S6	0.214	0.131	0.134	242.858
F	2	Standard S6	0.22	0.137	0.134	256.839
F	3	Standard S6	0.219	0.136	0.134	253.288
G	1	Standard S7	0.147	0.064	0.07	95.507
G	2	Standard S7	0.158	0.075	0.07	119.03
G	3	Standard S7	0.155	0.072	0.07	111.929
H	1	Standard S8	0.086	0.003	0.002	-40.749
H	2	Standard S8	0.085	0.002	0.002	-43.411
H	3	Standard S8	0.084	0.001	0.002	-44.521
Basic settings
Measurement type:	Absorbance
Microplate name:	COSTAR 96
Endpoint settings
No. of flashes per well:	22
Optic settings
Excitation:	562
General settings
Top optic used
Settling time [s]:	0.5
Reading direction:	bidirectional, horizontal left to right, top to bottom
Target temperature [°C]:	set off
Target concentration O2 [%]:	set off
Target concentration CO2 [%]:	set off

## Sheet: S3B (BCA_21-40)
User: USER
Test ID: 6914
Test Name: Federico BCA
Date: 10/03/2020
Time: 2:48:28 PM
Absorbance			Absorbance values are displayed as OD
	1. Raw Data (562)
	1	2	3	4	5	6	7	8	9	10	11	12
A	1.208	1.176	1.116	0.293	0.295	0.302	0.315	0.282	0.243	0.248	0.231	0.213
B	0.892	1.053	0.872	0.29	0.289	0.306	0.318	0.272	0.248	0.252	0.234	0.21
C	0.683	0.653	0.595	0.288	0.294	0.3	0.32	0.274	0.248	0.247	0.231	0.21
D	0.474	0.487	0.519	0.176	0.3	0.271	0.273	0.24	0.207	0.237	0.21	0.198
E	0.475	0.477	0.364	0.18	0.308	0.272	0.272	0.251	0.211	0.239	0.23	0.201
F	0.216	0.219	0.22	0.177	0.308	0.275	0.281	0.238	0.214	0.236	0.218	0.201
G	0.159	0.158	0.16	0.19	0.18	0.183	0.078	0.077	0.078
H	0.084	0.08	0.084	0.197	0.198	0.182	0.083	0.081	0.084
	2. Blank corrected based on Raw Data (562)
	1	2	3	4	5	6	7	8	9	10	11	12		Average of all blanks used
A	1.125	1.093	1.034	0.211	0.212	0.22	0.233	0.199	0.16	0.166	0.149	0.13
B	0.81	0.97	0.789	0.208	0.206	0.224	0.235	0.189	0.166	0.169	0.151	0.128
C	0.601	0.57	0.512	0.205	0.212	0.218	0.237	0.192	0.165	0.164	0.149	0.128
D	0.391	0.404	0.436	0.093	0.217	0.188	0.19	0.158	0.125	0.154	0.127	0.115
E	0.393	0.394	0.281	0.098	0.226	0.189	0.189	0.168	0.128	0.157	0.147	0.118
F	0.134	0.136	0.138	0.094	0.225	0.192	0.198	0.155	0.131	0.154	0.136	0.119
G	0.076	0.076	0.077	0.107	0.097	0.101	-0.005	-0.006	-0.005
H	0.001	-0.002	0.001	0.114	0.115	0.1
	3. Average over replicates based on Blank corrected (562)
	1	2	3	4	5	6	7	8	9	10	11	12
A	1.084	1.084	1.084	0.208	0.21	0.22	0.235	0.193	0.164	0.166	0.15	0.128
B	0.856	0.856	0.856	0.208	0.21	0.22	0.235	0.193	0.164	0.166	0.15	0.128
C	0.561	0.561	0.561	0.208	0.21	0.22	0.235	0.193	0.164	0.166	0.15	0.128
D	0.411	0.411	0.411	0.095	0.223	0.19	0.193	0.16	0.128	0.155	0.137	0.117
E	0.356	0.356	0.356	0.095	0.223	0.19	0.193	0.16	0.128	0.155	0.137	0.117
F	0.136	0.136	0.136	0.095	0.223	0.19	0.193	0.16	0.128	0.155	0.137	0.117
G	0.076	0.076	0.076	0.112	0.099	0.099	-0.005	-0.005	-0.005
H	0.0001	0.0001	0.0001	0.112	0.112	0.099
	4. Linear regression fit based on Blank corrected (562)
	1	2	3	4	5	6	7	8	9	10	11	12
A	2029.82	1972.06	1863.14	2872.12	2892.59	3005.17	3190.86	2705.45	2133.77	2215.65	1964.17	1690.76
B	1453.39	1746.54	1416.65	2826.8	2804.87	3060.73	3230.34	2559.24	2211.26	2268.28	2005.11	1655.67
C	1071.42	1015.49	909.674	2788.79	2888.21	2974.47	3253.73	2592.87	2203.95	2187.87	1965.63	1657.13
D	688.899	712.292	770.776	1157.1	2964.24	2544.62	2573.86	2097.22	1611.81	2048.97	1646.9	1471.45
E	691.092	694.016	487.314	1218.51	3091.44	2551.93	2559.24	2246.35	1667.37	2084.06	1939.31	1519.69
F	217.924	223.224	225.6	1170.26	3087.05	2600.18	2690.83	2059.2	1711.23	2038.73	1774.1	1527.01
G	112.654	111.923	114.299	1357.4	1208.27	1265.29	-35.017	-36.844	-34.651
H	-23.868	-30.63	-23.685	1459.75	1471.45	1246.29
																				Formula:	Y = Slope * x + Offset
																					Fit results are based on OD values
																				Wavelength:	Slope	0.000547163
																				562	Offset	0.0143598
																					r	0.996627
																					r²	0.993265
Well Row	Well Col	Content	Raw Data (562)	Blank corrected based on Raw Data (562)	Average over replicates based on Blank corrected (562)	Linear regression fit based on Blank corrected (562)
H	7	Blank B	0.083
H	8	Blank B	0.081
H	9	Blank B	0.084
G	7	Negative control N	0.078	-0.005	-0.005	-35.017
G	8	Negative control N	0.077	-0.006	-0.005	-36.844
G	9	Negative control N	0.078	-0.005	-0.005	-34.651
A	4	Sample X11	0.293	0.211	0.208	2872.12
B	4	Sample X11	0.29	0.208	0.208	2826.8
C	4	Sample X11	0.288	0.205	0.208	2788.79
A	5	Sample X13	0.295	0.212	0.21	2892.59
B	5	Sample X13	0.289	0.206	0.21	2804.87
C	5	Sample X13	0.294	0.212	0.21	2888.21
A	6	Sample X15	0.302	0.22	0.22	3005.17
B	6	Sample X15	0.306	0.224	0.22	3060.73
C	6	Sample X15	0.3	0.218	0.22	2974.47
A	8	Sample X19	0.282	0.199	0.193	2705.45
B	8	Sample X19	0.272	0.189	0.193	2559.24
C	8	Sample X19	0.274	0.192	0.193	2592.87
A	7	Sample X21	0.315	0.233	0.235	3190.86
B	7	Sample X21	0.318	0.235	0.235	3230.34
C	7	Sample X21	0.32	0.237	0.235	3253.73
A	9	Sample X23	0.243	0.16	0.164	2133.77
B	9	Sample X23	0.248	0.166	0.164	2211.26
C	9	Sample X23	0.248	0.165	0.164	2203.95
A	10	Sample X24	0.248	0.166	0.166	2215.65
B	10	Sample X24	0.252	0.169	0.166	2268.28
C	10	Sample X24	0.247	0.164	0.166	2187.87
A	11	Sample X26	0.231	0.149	0.15	1964.17
B	11	Sample X26	0.234	0.151	0.15	2005.11
C	11	Sample X26	0.231	0.149	0.15	1965.63
A	12	Sample X28	0.213	0.13	0.128	1690.76
B	12	Sample X28	0.21	0.128	0.128	1655.67
C	12	Sample X28	0.21	0.128	0.128	1657.13
D	4	Sample X29	0.176	0.093	0.095	1157.1
E	4	Sample X29	0.18	0.098	0.095	1218.51
F	4	Sample X29	0.177	0.094	0.095	1170.26
D	5	Sample X30	0.3	0.217	0.223	2964.24
E	5	Sample X30	0.308	0.226	0.223	3091.44
F	5	Sample X30	0.308	0.225	0.223	3087.05
D	6	Sample X31	0.271	0.188	0.19	2544.62
E	6	Sample X31	0.272	0.189	0.19	2551.93
F	6	Sample X31	0.275	0.192	0.19	2600.18
D	7	Sample X32	0.273	0.19	0.193	2573.86
E	7	Sample X32	0.272	0.189	0.193	2559.24
F	7	Sample X32	0.281	0.198	0.193	2690.83
D	8	Sample X33	0.24	0.158	0.16	2097.22
E	8	Sample X33	0.251	0.168	0.16	2246.35
F	8	Sample X33	0.238	0.155	0.16	2059.2
D	9	Sample X34	0.207	0.125	0.128	1611.81
E	9	Sample X34	0.211	0.128	0.128	1667.37
F	9	Sample X34	0.214	0.131	0.128	1711.23
D	10	Sample X35	0.237	0.154	0.155	2048.97
E	10	Sample X35	0.239	0.157	0.155	2084.06
F	10	Sample X35	0.236	0.154	0.155	2038.73
D	11	Sample X36	0.21	0.127	0.137	1646.9
E	11	Sample X36	0.23	0.147	0.137	1939.31
F	11	Sample X36	0.218	0.136	0.137	1774.1
D	12	Sample X37	0.198	0.115	0.117	1471.45
E	12	Sample X37	0.201	0.118	0.117	1519.69
F	12	Sample X37	0.201	0.119	0.117	1527.01
G	4	Sample X38	0.19	0.107	0.112	1357.4
H	4	Sample X38	0.197	0.114	0.112	1459.75
H	5	Sample X38	0.198	0.115	0.112	1471.45
G	5	Sample X39	0.18	0.097	0.099	1208.27
G	6	Sample X39	0.183	0.101	0.099	1265.29
H	6	Sample X39	0.182	0.1	0.099	1246.29
A	1	Standard S1	1.208	1.125	1.084	2029.82
A	2	Standard S1	1.176	1.093	1.084	1972.06
A	3	Standard S1	1.116	1.034	1.084	1863.14
B	1	Standard S2	0.892	0.81	0.856	1453.39
B	2	Standard S2	1.053	0.97	0.856	1746.54
B	3	Standard S2	0.872	0.789	0.856	1416.65
C	1	Standard S3	0.683	0.601	0.561	1071.42
C	2	Standard S3	0.653	0.57	0.561	1015.49
C	3	Standard S3	0.595	0.512	0.561	909.674
D	1	Standard S4	0.474	0.391	0.411	688.899
D	2	Standard S4	0.487	0.404	0.411	712.292
D	3	Standard S4	0.519	0.436	0.411	770.776
E	1	Standard S5	0.475	0.393	0.356	691.092
E	2	Standard S5	0.477	0.394	0.356	694.016
E	3	Standard S5	0.364	0.281	0.356	487.314
F	1	Standard S6	0.216	0.134	0.136	217.924
F	2	Standard S6	0.219	0.136	0.136	223.224
F	3	Standard S6	0.22	0.138	0.136	225.6
G	1	Standard S7	0.159	0.076	0.076	112.654
G	2	Standard S7	0.158	0.076	0.076	111.923
G	3	Standard S7	0.16	0.077	0.076	114.299
H	1	Standard S8	0.084	0.001	0.0001	-23.868
H	2	Standard S8	0.08	-0.002	0.0001	-30.63
H	3	Standard S8	0.084	0.001	0.0001	-23.685
Basic settings
Measurement type:	Absorbance
Microplate name:	COSTAR 96
Endpoint settings
No. of flashes per well:	22
Optic settings
Excitation:	562
General settings
Top optic used
Settling time [s]:	0.5
Reading direction:	bidirectional, horizontal left to right, top to bottom
Target temperature [°C]:	set off
Target concentration O2 [%]:	set off
Target concentration CO2 [%]:	set off

## Sheet: S3C (Tryptic_Peptides)
	1. Raw Data (562)
	1	2	3	4	5	6	7	8	9	10	11	12
A	1.054	1.067	1.113	0.362	0.372	0.326	0.368	0.252	0.363	0.379	0.349	0.379
B	0.836	0.854	0.847	0.312	0.377	0.393	0.39	0.445	0.413	0.383	0.421	0.406
C	0.6	0.593	0.591	0.102	0.409	0.399	0.419	0.404	0.399	0.436	0.418	0.425
D	0.515	0.51	0.509	0.396	0.412	0.449	0.413	0.47	0.445	0.396	0.444	0.41
E	0.346	0.339	0.334	0.407	0.42	0.452	0.537
F	0.252	0.22	0.221
G	0.146	0.151	0.156
H	0.079	0.083	0.082	0.098	0.102	0.1	0.082	0.08	0.078
	2. Linear regression fit based on Blank corrected (562)
	1	2	3	4	5	6	7	8	9	10	11	12
A	1920.49	1945.52	2037.43	2135.31	2220.21	1851.77	2185.77	1259.06	2143.32	2276.28	2033.59	2273.87
B	1483.77	1519.81	1505.39	1738.83	2256.25	2386.01	2357.97	2798.5	2543.8	2301.11	2611.08	2486.93
C	1009.8	997.182	992.777	51.208	2512.56	2430.86	2595.86	2476.52	2434.87	2732.02	2589.45	2639.91
D	840.995	831.383	827.779	2412.44	2540.59	2834.55	2545.4	3001.14	2802.51	2411.64	2790.49	2518.97
E	502.99	487.771	478.761	2501.35	2599.86	2860.18	3542.59
F	314.764	249.486	251.889
G	101.108	112.321	121.132
H	-31.651	-25.244	-25.644				-27.046	-30.25	-34.054
																				Formula:	Y = Slope * x + Offset
																					Fit results are based on OD values
																				Wavelength:	Slope	0.000499401
																				562	Offset	-0.00479337
																					r	0.998316
																					r²	0.996634
Well Row	Well Col	Content	Raw Data (562)	Linear regression fit based on Blank corrected (562)
H	4	Blank B	0.098
H	5	Blank B	0.102
H	6	Blank B	0.1
H	7	Control C1	0.082	-27.046
H	8	Control C2	0.08	-30.25
H	9	Control C3	0.078	-34.054
A	4	Sample X1	0.362	2135.31
A	5	Sample X2	0.372	2220.21
A	6	Sample X3	0.326	1851.77
A	7	Sample X4	0.368	2185.77
A	8	Sample X5	0.252	1259.06
A	9	Sample X6	0.363	2143.32
A	10	Sample X7	0.379	2276.28
A	11	Sample X8	0.349	2033.59
A	12	Sample X9	0.379	2273.87
B	4	Sample X10	0.312	1738.83
B	5	Sample X11	0.377	2256.25
B	6	Sample X12	0.393	2386.01
B	7	Sample X13	0.39	2357.97
B	8	Sample X14	0.445	2798.5
B	9	Sample X15	0.413	2543.8
B	10	Sample X16	0.383	2301.11
B	11	Sample X17	0.421	2611.08
B	12	Sample X18	0.406	2486.93
C	4	Sample X19	0.102	51.208
C	5	Sample X20	0.409	2512.56
C	6	Sample X21	0.399	2430.86
C	7	Sample X22	0.419	2595.86
C	8	Sample X23	0.404	2476.52
C	9	Sample X24	0.399	2434.87
C	10	Sample X25	0.436	2732.02
C	11	Sample X26	0.418	2589.45
C	12	Sample X27	0.425	2639.91
D	4	Sample X28	0.396	2412.44
D	5	Sample X29	0.412	2540.59
D	6	Sample X30	0.449	2834.55
D	7	Sample X31	0.413	2545.4
D	8	Sample X32	0.47	3001.14
D	9	Sample X33	0.445	2802.51
D	10	Sample X34	0.396	2411.64
D	11	Sample X35	0.444	2790.49
D	12	Sample X36	0.41	2518.97
E	4	Sample X37	0.407	2501.35
E	5	Sample X38	0.42	2599.86
E	6	Sample X39	0.452	2860.18
E	7	Sample X40	0.537	3542.59
A	1	Standard S1	1.054	1920.49
A	2	Standard S1	1.067	1945.52
A	3	Standard S1	1.113	2037.43
B	1	Standard S2	0.836	1483.77
B	2	Standard S2	0.854	1519.81
B	3	Standard S2	0.847	1505.39
C	1	Standard S3	0.6	1009.8
C	2	Standard S3	0.593	997.182
C	3	Standard S3	0.591	992.777
D	1	Standard S4	0.515	840.995
D	2	Standard S4	0.51	831.383
D	3	Standard S4	0.509	827.779
E	1	Standard S5	0.346	502.99
E	2	Standard S5	0.339	487.771
E	3	Standard S5	0.334	478.761
F	1	Standard S6	0.252	314.764
F	2	Standard S6	0.22	249.486
F	3	Standard S6	0.221	251.889
G	1	Standard S7	0.146	101.108
G	2	Standard S7	0.151	112.321
G	3	Standard S7	0.156	121.132
H	1	Standard S8	0.079	-31.651
H	2	Standard S8	0.083	-25.244
H	3	Standard S8	0.082	-25.644
Basic settings
Measurement type:	Absorbance
Microplate name:	COSTAR 96
Endpoint settings
No. of flashes per well:	22
Optic settings
Excitation:	562
General settings
Top optic used
Settling time [s]:	0.5
Reading direction:	bidirectional, horizontal left to right, top to bottom
Target temperature [°C]:	set off
Target concentration O2 [%]:	set off
Target concentration CO2 [%]:	set off

## Sheet: S3D (rProtein)
	1. Raw Data (562)
	1	2	3	4	5	6	7	8	9	10	11	12
A	0.982	0.965	0.974	0.174	0.245	0.608	0.744	0.082
B	0.793	0.793	0.786	0.187	0.326	0.703	0.831	0.083
C	0.549	0.551	0.55	0.28	0.323	0.818	0.817	0.083
D	0.468	0.466	0.474
E	0.336	0.336	0.346
F	0.211	0.212	0.216
G	0.147	0.145	0.147
H	0.09	0.09	0.088
	2. Linear regression fit
	Curve average (A -562 nm)	Curve protein concentrations (µg/ml)	Curve protein content (µg)	Sample ID	Sample average (A -562 nm)	Protein amount in samples (µg in 6µL)	µg / µL samples	0.3 µL / mg FW	rProtein content (µg / mg FW)
A	0.973667	2000	20	S1	0.174	1.64507	0.274179	0.3	0.0822536
B	0.790667	1500	15	S2	0.187	1.93339	0.322231	0.3	0.0966693
C	0.55	1000	10	S3	0.28	3.99594	0.66599	0.3	0.199797
D	0.469333	750	7.5	S4	0.245	3.21971	0.536618	0.3	0.160986
E	0.339333	500	5	S5	0.326	5.01613	0.836021	0.3	0.250806
F	0.213	250	2.5	S6	0.323	4.94959	0.824932	0.3	0.24748
G	0.146333	125	1.25	S7	0.608	11.2703	1.87839	0.3	0.563516
H	0.0893333	25	0.25	S8	0.703	13.3772	2.22954	0.3	0.668862
				S9	0.818	15.9277	2.65462	0.3	0.796385
				S10	0.744	14.2865	2.38109	0.3	0.714327
				S11	0.831	16.216	2.70267	0.3	0.810801
				S12	0.817	15.9055	2.65092	0.3	0.795276
Measurements:
Meas				A
Exc. filter				N/A
Excitation wavelength				562 nm
Measurement height				7.5 mm
Number of flashes				90
Number of flashes integrated				43
Flash power				1
Excitation light				1
Reference excitation light				1
Reference AD gain				1
Reference signal				60246
Filters:
Monochromator cutoff 230				140
Filter polarization				None
Description				X230co Longpass=230nm Tmin=90%
Monochromator cutoff 360				141
Filter polarization				None
Description				X360co Longpass=360nm Tmin=90%
Monochromator cutoff 585				142
Filter polarization				None
Description				X585co Longpass=585nm Tmin=75%
Instrument:
Serial number				23000782
Nickname				EnSpire

## Sheet: S3E (Data_Interpretation)
	Samples	Control_Tip	Control_Tip	Control_Tip	Control_Tip	Control_Tip	Control_Tip-adjacent	Control_Tip-adjacent	Control_Tip-adjacent	Control_Tip-adjacent	Control_Tip-adjacent	Cold_Tip	Cold_Tip	Cold_Tip	Cold_Tip	Cold_Tip	Cold_Tip-adjacent	Cold_Tip-adjacent	Cold_Tip-adjacent	Cold_Tip-adjacent	Cold_Tip-adjacent	Chitin_Tip	Chitin_Tip	Chitin_Tip	Chitin_Tip	Chitin_Tip	Chitin_Tip-adjacent	Chitin_Tip-adjacent	Chitin_Tip-adjacent	Chitin_Tip-adjacent	Chitin_Tip-adjacent	Chitosan_Tip	Chitosan_Tip	Chitosan_Tip	Chitosan_Tip	Chitosan_Tip	Chitosan_Tip-adjacent	Chitosan_Tip-adjacent	Chitosan_Tip-adjacent	Chitosan_Tip-adjacent	Chitosan_Tip-adjacent
	Rep1	6153.92	3308.09	4582.77	3347.14	1683.67	2203.84	2576.66	1923.34	973.544	1188.36	758.731	1848.78	2818.1	1261.15	1227.41	2225.14	1722.73	1637.51	-370.371	1396.07	2872.12	2892.59	3005.17	3190.86	2705.45	2133.77	2215.65	1964.17	1690.76	1157.1	2964.24	2544.62	2573.86	2097.22	1611.81	2048.97	1646.9	1471.45	1357.4	1208.27
	Rep2	5291.12	3492.72	4103.43	3547.76	1690.77	2361.84	2503.87	2003.23	1001.95	1142.2	680.617	2139.93	2473.69	1497.26	1202.56	2258.87	1696.1	1745.81	-357.944	1548.75	2826.8	2804.87	3060.73	3230.34	2559.24	2211.26	2268.28	2005.11	1655.67	1218.51	3091.44	2551.93	2559.24	2246.35	1667.37	2084.06	1939.31	1519.69	1459.75	1265.29
	Rep3	5172.17	3288.56	3840.68	3576.16	8470.71	2468.36	2587.31	2015.66	920.285	1183.03	847.497	2008.55	2647.67	1159.95	1323.28	2342.31	2161.23	1781.31	-377.472	1577.15	2788.79	2888.21	2974.47	3253.73	2592.87	2203.95	2187.87	1965.63	1657.13	1170.26	3087.05	2600.18	2690.83	2059.2	1711.23	2038.73	1774.1	1527.01	1471.45	1246.29
Protein	µg/ml	5539.07	3363.12	4175.63	3490.35	3948.38	2344.68	2555.94	1980.74	965.259	1171.2	762.282	1999.09	2646.49	1306.12	1251.09	2275.44	1860.02	1721.54	-368.596	1507.32	2829.24	2861.89	3013.46	3224.97	2619.18	2182.99	2223.93	1978.3	1667.85	1181.95	3047.57	2565.57	2607.97	2134.26	1663.47	2057.25	1786.77	1506.05	1429.53	1239.95
	µg/µL	5.53907	3.36312	4.17563	3.49035	3.94838	2.34468	2.55594	1.98074	0.965259	1.1712	0.762282	1.99909	2.64649	1.30612	1.25109	2.27544	1.86002	1.72154	-0.368596	1.50732	2.82924	2.86189	3.01346	3.22497	2.61918	2.18299	2.22393	1.9783	1.66785	1.18195	3.04757	2.56557	2.60797	2.13426	1.66347	2.05725	1.78677	1.50605	1.42953	1.23995
	µg/100µL or µg/40mg FW	553.907	336.312	417.563	349.035	394.838	234.468	255.594	198.074	96.5259	117.12	76.2282	199.909	264.649	130.612	125.109	227.544	186.002	172.154	-36.8596	150.732	282.924	286.189	301.346	322.497	261.918	218.299	222.393	197.83	166.785	118.195	304.757	256.557	260.797	213.426	166.347	205.725	178.677	150.605	142.953	123.995
	Intial weight (W0)	40	40	40	40	40	40	40	40	40	40	27.3	40	40	40	40	40	40	40	40	40	40	37	40	40	40	40	40	40	40	40	40	40	40	40	40	40	40	40	40	40
	µg/mg FW or mg/g FW (normalized to W0)	13.8477	8.4078	10.4391	8.72588	9.87096	5.8617	6.38986	4.95185	2.41315	2.92799	2.79224	4.99771	6.61621	3.2653	3.12771	5.68861	4.65005	4.30386	-0.921489	3.76831	7.07309	7.73484	7.53365	8.06244	6.54796	5.45749	5.55983	4.94576	4.16963	2.95488	7.61894	6.41394	6.51994	5.33565	4.15867	5.14314	4.46692	3.76512	3.57383	3.09987
	Sample to 100µg	18.0536	29.7343	23.9485	28.6504	25.3268	42.6497	39.1245	50.4862	103.599	85.3828	131.185	50.0229	37.786	76.5626	79.9306	43.9475	53.7629	58.0874	-271.3	66.3428	35.3452	34.9419	33.1844	31.008	38.1798	45.8086	44.9654	50.5484	59.9573	84.6058	32.813	38.9776	38.3439	46.8547	60.1154	48.6085	55.9669	66.3989	69.9529	80.6485
	8M urea 50mM TEAB	81.9464	70.2657	76.0515	71.3496	74.6732	57.3503	60.8755	49.5138	-3.5991	14.6172	-31.1851	49.9771	62.214	23.4374	20.0694	56.0525	46.2371	41.9126	371.3	33.6572	64.6548	65.0581	66.8156	68.992	61.8202	54.1914	55.0346	49.4516	40.0427	15.3942	67.187	61.0224	61.6561	53.1453	39.8846	51.3915	44.0331	33.6011	30.0471	19.3515
Peptide	µg/ml	2135.31	2220.21	1851.77	2185.77	1259.06	2143.32	2276.28	2033.59	2273.87	1738.83	2256.25	2386.01	2357.97	2798.5	2543.8	2301.11	2611.08	2486.93	51.208	2512.56	2430.86	2595.86	2476.52	2434.87	2732.02	2589.45	2639.91	2412.44	2540.59	2834.55	2545.4	3001.14	2802.51	2411.64	2790.49	2518.97	2501.35	2599.86	2860.18	3542.59
	µg/µL	2.13531	2.22021	1.85177	2.18577	1.25906	2.14332	2.27628	2.03358	2.27387	1.73883	2.25625	2.38601	2.35797	2.7985	2.5438	2.30111	2.61108	2.48693	0.051208	2.51256	2.43086	2.59586	2.47652	2.43487	2.73202	2.58945	2.63991	2.41244	2.54059	2.83454	2.5454	3.00115	2.80251	2.41164	2.79049	2.51897	2.50135	2.59986	2.86018	3.54259
	Sample to 10µg	4.68317	4.50408	5.40025	4.57505	7.94246	4.66567	4.39314	4.91742	4.39778	5.75099	4.43213	4.1911	4.24093	3.57334	3.93113	4.34574	3.82984	4.02103	195.282	3.98001	4.11377	3.85229	4.03793	4.107	3.66029	3.86182	3.78801	4.14518	3.93609	3.5279	3.92866	3.33206	3.56823	4.14656	3.5836	3.96988	3.99785	3.84636	3.49629	2.82279
	100mM TEAB	5.31683	5.49592	4.59975	5.42495	2.05754	5.33433	5.60686	5.08258	5.60222	4.24901	5.56787	5.8089	5.75907	6.42666	6.06887	5.65426	6.17016	5.97897	-185.282	6.01999	5.88623	6.14771	5.96207	5.893	6.33971	6.13818	6.21199	5.85482	6.06391	6.4721	6.07134	6.66794	6.43177	5.85344	6.4164	6.03012	6.00215	6.15364	6.50371	7.17721
	Protein		Peptide
	Sample to 100µg	8M urea 50mM TEAB	Sample to 10µg	100mM TEAB
	18.0536	81.9464	4.68317	5.31683
	29.7343	70.2657	4.50408	5.49592
	23.9485	76.0515	5.40025	4.59975
	28.6504	71.3496	4.57505	5.42495
	25.3268	74.6732	7.94246	2.05754
	42.6497	57.3503	4.66567	5.33433
	39.1245	60.8755	4.39314	5.60686
	50.4862	49.5138	4.91742	5.08258
	103.599	-3.5991	4.39778	5.60222
	85.3828	14.6172	5.75099	4.24901
	131.185	-31.1851	4.43213	5.56787
	50.0229	49.9771	4.1911	5.8089
	37.786	62.214	4.24093	5.75907
	76.5626	23.4374	3.57334	6.42666
	79.9306	20.0694	3.93113	6.06887
	43.9475	56.0525	4.34574	5.65426
	53.7629	46.2371	3.82984	6.17016
	58.0874	41.9126	4.02103	5.97897
	-271.3	371.3	195.282	-185.282
	66.3428	33.6572	3.98001	6.01999
	35.3452	64.6548	4.11377	5.88623
	34.9419	65.0581	3.85229	6.14771
	33.1844	66.8156	4.03793	5.96207
	31.008	68.992	4.107	5.893
	38.1798	61.8202	3.66029	6.33971
	45.8086	54.1914	3.86182	6.13818
	44.9654	55.0346	3.78801	6.21199
	50.5484	49.4516	4.14518	5.85482
	59.9573	40.0427	3.93609	6.06391
	84.6058	15.3942	3.5279	6.4721
	32.813	67.187	3.92866	6.07134
	38.9776	61.0224	3.33206	6.66794
	38.3439	61.6561	3.56823	6.43177
	46.8547	53.1453	4.14656	5.85344
	60.1154	39.8846	3.5836	6.4164
	48.6085	51.3915	3.96988	6.03012
	55.9669	44.0331	3.99785	6.00215
	66.3989	33.6011	3.84636	6.15364
	69.9529	30.0471	3.49629	6.50371
	80.6485	19.3515	2.82279	7.17721
