# Supplementary material for: Membrane-Enriched Proteomics Link Ribosome Accumulation and Proteome Reprogramming With Cold Acclimation in Barley Root Meristems
Source: Front Plant Sci. 2021 Apr 30;12:656683. doi: 10.3389/fpls.2021.656683 (PMC8121087; doi:10.3389/fpls.2021.656683)
Supplement: Supplementary file 4 [file Table_4.XLSX]

## Sheet: Supplementary Table 4
Protein_IDs	Normalized_Log2_Intensities																																							Class discovery			Class comparison - P values
Supplementary Table 4. Normalized protein intensities and statistics. Related to Figure 4; Supplementary Figure 3 The normalized Log2 intensities are sorted according to a bootstrapped HCA (n = 10,000). Clusters of samples that are highly supported by the data (AU - P values > 95%) have been designated by red and black transitions of font colors (4 clusters, columns B-P; Q-AE; AF-AJ; AK-AN). Subs…	tip-adjacent_chitin.1	tip-adjacent_chitosan.3	tip-adjacent_control.2	tip-adjacent_control	tip-adjacent_chitin	tip-adjacent_chitosan	tip-adjacent_chitosan.1	tip-adjacent_chitin.4	tip-adjacent_chitin.3	tip-adjacent_chitin.2	tip-adjacent_chitosan.2	tip-adjacent_control.1	tip-adjacent_control.4	tip-adjacent_control.3	tip-adjacent_chitosan.4	tip_chitin	tip_chitin.2	tip_chitosan.3	tip_chitosan.4	tip_control	tip_chitosan	tip_chitin.1	tip_chitosan.1	tip_control.2	tip_control.1	tip_chitin.3	tip_control.4	tip_chitin.4	tip_control.3	tip_chitosan.2	tip_cold.4	tip_cold.3	tip_cold	tip_cold.1	tip_cold.2	tip-adjacent_cold.1	tip-adjacent_cold.2	tip-adjacent_cold	tip-adjacent_cold.3	Cluster_Rows_Kmeans_(5k)	Cluster_Rows_AU_99%	Assumptions_tested	(Intercept)	Factor1tip	Factor2chitin	Factor2chitosan	Factor2cold	Factor1tip:Factor2chitin	Factor1tip:Factor2chitosan
HORVU1Hr1G016660.1	-0.0361183	-0.388875	0.235287	0.351088	0.16717	0.312405	0.592005	0.288137	-0.448231	0.27446	-0.0204584	0.746896	0.338885	0.230598	-0.478997	-0.27044	-0.197907	-0.926113	-0.861687	-0.358611	-0.251214	-0.47893	-0.599043	-0.577473	-1.05695	-0.657149	-0.736597	-0.516909	-0.574181	-0.440215	-0.676466	-0.879066	-0.938603	-0.79615	-1.09188	0.720906	1.07956	0.604359	0.603421	1	NA	Homoscedastic & Non-parametric	6.3035e-13	6.8063e-06	0.0782665	0.0680396	0.0524468	0.0487929	0.24873
HORVU2Hr1G073680.3	-0.497563	-0.268129	0.668029	0.796961	-0.196477	0.509823	-0.0278832	0.237748	0.0582134	-0.358571	0.0922306	0.569998	0.0594082	0.46452	-0.347511	-0.036148	-0.023155	-0.789678	-0.54745	0.175686	-0.39254	-1.37371	-0.447725	-0.0398156	-0.0561039	-0.717721	-1.14294	-0.499123	-0.564728	-0.656495	-0.830632	-0.989249	-1.12275	-0.777254	0.0369206	0.640447	0.765159	0.346393	-0.200395	1	NA	Homoscedastic & Parametric	2.95835e-14	0.000456509	0.00177873	0.00945877	0.561579	0.0624972	0.229388
HORVU5Hr1G092160.4;HORVU5Hr1G092120.1	-0.720629	-1.30641	0.341712	2.17854	0.0675471	0.809355	0.762763	0.357014	-0.218553	0.0725378	0.648794	0.0892035	-0.157533	-0.563152	-0.370664	-0.51699	-0.551284	-1.10514	-0.984974	0.200885	-0.0652425	-0.839089	-0.821123	-0.590693	-0.694975	-0.777277	-1.42741	-0.545245	-0.840229	-0.669667	-0.792216	-0.793638	-0.641961	-0.837769	-0.393689	0.500705	0.908922	0.0506644	-0.0648005	1	NA	Homoscedastic & Non-parametric	2.71034e-05	0.00991804	0.0795004	0.301152	0.441149	0.467605	0.840457
HORVU1Hr1G092110.4	0.144374	0.502496	0.300158	0.623419	0.962523	0.505529	0.375625	0.600251	-0.225912	-0.217722	-0.342248	0.419697	0.29987	-0.302848	1.21824	-0.0951303	-0.168568	-0.589784	0.341767	-0.398581	-0.388734	-0.528703	-0.200565	-0.526743	-0.438313	-0.00191346	-0.829452	-0.499088	-0.25766	-0.259764	-0.888367	-0.420709	-0.964527	-0.644922	-0.314515	-0.912361	-0.48285	-1.31693	-0.73144	1	NA	Homoscedastic & Non-parametric	1.11733e-09	0.00429579	0.897117	0.329996	0.00055404	0.450121	0.58784
HORVU4Hr1G005380.1	0.219425	0.220323	0.399284	0.620879	0.337812	0.118649	0.0666437	0.298999	0.253436	0.335825	0.312355	-0.0576732	0.379621	0.527965	0.408431	0.103997	-0.075852	-0.0485433	0.148599	0.0299361	-0.114195	-0.0612213	-0.418442	-0.392292	-0.50035	-0.441656	-0.584325	-0.392132	-0.095502	-0.133559	-0.718085	-1.21883	-1.82375	-1.42586	-1.13767	0.10962	0.899853	-0.00974028	0.269398	1	NA	Homoscedastic & Parametric	1.18852e-16	0.000158513	0.441291	0.236272	0.830919	0.311502	0.13091
HORVU2Hr1G050450.3	-0.0255943	-0.0409417	0.35318	0.513869	0.471493	0.333493	0.256391	0.383253	0.362035	0.28261	0.114565	0.0589027	-0.0610254	0.12539	0.554953	-0.0338554	-0.10004	-0.338545	0.0156992	-0.201075	-0.235344	-0.35684	-0.342055	-0.675744	-0.335521	0.0425117	-0.827663	-0.491924	-0.0750965	-0.0972418	-0.755402	-0.0671491	-0.671569	-0.897639	-0.744309	0.175904	0.357337	-0.0824331	-0.124096	1	NA	Homoscedastic & Parametric	1.13823e-16	0.000432234	0.46042	0.721724	0.403144	0.727374	0.588253
HORVU5Hr1G040970.5	0.0500467	-0.118436	0.0355651	0.404607	0.259295	0.256997	0.335053	0.426377	0.539115	0.573546	0.854814	0.195636	0.301753	0.606013	0.273517	-0.0642434	-0.226782	-0.238429	0.091595	-0.124523	-0.157746	0.331607	-0.111167	-0.586562	-0.134485	-0.479079	-0.765818	-0.432779	-0.287625	-0.207319	-1.05605	-0.906815	-1.1703	-0.526339	-0.406869	-0.263075	0.188357	-0.535413	-0.663098	1	NA	Homoscedastic & Parametric	6.46021e-15	0.000814819	0.674058	0.818725	0.00338114	0.692398	0.5406
HORVU2Hr1G028430.1	-0.109186	-0.38751	0.255217	-0.000381078	0.156041	0.359294	0.263742	0.370586	0.546121	-0.0887356	-0.0242704	0.756026	0.561964	0.354004	0.549887	0.0716229	-0.0279735	-0.399427	0.229023	-0.332055	-0.249014	-0.543007	-0.147743	0.0473338	-0.0560526	0.0650897	-0.35886	-0.20998	-0.083483	-0.268148	-1.03402	-0.672035	-1.23657	-0.75585	-0.616023	0.212736	0.314048	-0.0153004	-0.202823	1	NA	Homoscedastic & Parametric	4.68876e-16	0.00151634	0.149632	0.133133	0.0515331	0.247529	0.288132
HORVU7Hr1G098110.5	0.264647	-0.21311	0.216035	0.385187	0.652725	0.331179	0.556645	0.680847	0.346731	0.249833	0.0235182	0.619668	0.566589	0.160643	0.213181	0.23524	0.318365	-0.983374	-0.108912	-0.404215	-0.339845	0.221445	-0.537773	-0.497172	-0.292401	-0.274778	-0.71479	0.412979	-0.410515	-0.513196	-1.09684	-1.15388	-1.15513	-1.0211	-0.84105	0.216841	0.382939	0.0429376	0.0223697	1	NA	Homoscedastic & Parametric	7.39135e-18	3.27364e-06	0.657376	0.120516	0.0927876	0.0167874	0.284592
HORVU7Hr1G021430.1	0.0478473	-0.203661	0.219437	0.080359	0.412608	0.146671	0.286862	0.646491	0.630985	0.253952	0.152877	0.554794	0.561325	0.235649	0.26735	0.0221658	-0.103568	-0.601665	0.111265	-0.251642	-0.540014	-0.284323	-0.232047	-0.497796	-0.320481	-0.0321467	-0.538292	-0.0752232	-0.0162672	-0.304002	-0.754712	-0.996832	-0.901208	-0.847323	-0.895879	-0.359897	0.273271	-0.192349	-0.248136	1	NA	Homoscedastic & Parametric	3.4289e-18	4.59079e-05	0.508136	0.0988328	0.00244588	0.626224	0.205599
HORVU6Hr1G058820.1	0.0987314	-0.330574	0.234622	0.0706724	0.43605	0.135908	0.32161	0.479333	0.575392	0.181828	0.162826	0.537	0.376007	0.331142	0.17844	-0.00224138	-0.0964105	-0.680612	0.137644	-0.438402	-0.50472	-0.356151	-0.380936	-0.537981	-0.330014	-0.151811	-0.508625	0.0084582	-0.127041	-0.344587	-0.902926	-1.16368	-1.38439	-1.08074	-0.844592	0.078872	0.479545	0.184937	0.143169	1	NA	Homoscedastic & Parametric	3.921e-19	7.51032e-06	0.642978	0.0694042	0.441125	0.371726	0.129495
HORVU3Hr1G069410.4	-0.0236199	-0.240055	0.126602	0.329751	0.307361	0.296198	0.365884	0.34947	0.491924	0.241513	0.0956879	0.514922	0.385607	0.333112	0.209712	-0.0726949	-0.210434	-0.518343	0.0961965	-0.38394	-0.33281	-0.256595	-0.310356	-0.477711	-0.180082	-0.202219	-0.548505	-0.222582	-0.323463	-0.312793	-0.685346	-0.780591	-0.856095	-0.613938	-0.546568	0.0183849	0.129169	-0.132373	-0.373601	1	X418	Homoscedastic & Parametric	2.39768e-21	2.61391e-07	0.500354	0.0562935	0.000393122	0.153456	0.0541945
HORVU3Hr1G030150.1	-0.158754	-0.312686	0.111093	0.449319	0.269074	0.29497	0.457324	0.299961	0.41673	0.159379	0.0514219	0.595871	0.585843	0.302128	0.223119	-0.173614	-0.179199	-0.61344	-0.129927	-0.316543	-0.304422	-0.383729	-0.346563	-0.327489	-0.0659121	-0.418112	-0.651721	-0.383504	-0.568388	-0.552921	-0.669132	-0.659378	-0.803587	-0.693355	-0.374576	0.171834	0.225523	-0.254091	-0.423549	1	X418	Homoscedastic & Non-parametric	1.27431e-15	6.4486e-06	0.138482	0.0756905	0.00451971	0.227239	0.35614
HORVU4Hr1G020030.1	-0.0746542	-0.404263	0.201951	0.235353	0.329125	0.223283	0.354458	0.417868	0.381322	0.260843	0.0143464	0.580132	0.587673	0.152151	0.170474	0.0214467	-0.165455	-0.914401	-0.0376202	-0.341853	-0.449274	-0.362558	-0.574258	-0.6419	-0.209232	-0.346192	-0.752854	-0.367273	-0.649043	-0.948494	-1.28194	-1.05142	-0.898334	-1.38611	-0.839169	0.128414	0.307918	-0.177983	-0.171466	1	NA	Homoscedastic & Parametric	2.70355e-18	1.58678e-06	0.429792	0.0329323	0.0177627	0.119769	0.160849
HORVU3Hr1G074040.3	0.276326	-0.052544	0.458023	0.424391	0.568811	0.509001	0.0567364	0.493054	0.45242	-0.00124285	0.134175	0.322152	0.0110902	0.54244	0.580266	0.252504	0.0413965	-0.420186	0.238061	-0.37414	-0.35348	-0.24046	-0.114137	-0.41699	-0.416368	-0.223011	-0.748441	-0.357963	-0.0948121	0.00185261	-0.702663	-0.782525	-1.17378	-0.594643	-0.504834	-0.276993	0.0411988	-0.380419	-0.554919	1	NA	Homoscedastic & Parametric	3.21501e-17	2.90228e-05	0.942141	0.450919	0.000326848	0.264442	0.111747
HORVU1Hr1G057170.11	0.0376078	-0.16135	0.265225	0.279203	0.313069	0.317756	0.152259	0.439942	0.339224	0.0911049	0.0374173	0.398238	0.301962	0.308201	0.377311	-0.00485058	-0.0732708	-0.444522	0.167432	-0.408159	-0.494504	-0.247587	-0.239263	-0.336251	-0.277062	-0.154316	-0.629822	-0.369146	-0.210429	-0.192176	-0.884252	-0.752791	-1.17441	-0.533896	-0.30341	-0.139147	0.259891	-0.359587	-0.497972	1	NA	Homoscedastic & Parametric	1.87085e-19	7.43093e-06	0.569517	0.157117	0.000760539	0.184926	0.100416
HORVU6Hr1G088420.1	0.318348	-0.554321	0.583136	0.477721	0.543323	0.356101	0.102667	0.449193	0.44675	0.0694973	0.0129138	0.580464	0.438825	0.359283	0.201769	0.285963	0.0693672	-0.532861	-0.0546977	-0.216451	-0.40329	-0.0187636	-0.317992	-0.178228	-0.269009	-0.0735542	-0.523351	-0.134618	-0.17565	-0.152891	-0.995698	-1.20354	-1.17037	-0.935411	-0.819378	-0.260565	0.382979	-0.537026	-1.08988	1	NA	Homoscedastic & Parametric	1.30483e-18	5.49104e-06	0.308517	0.00145712	1.13546e-05	0.0510679	0.0220035
HORVU1Hr1G024240.1	0.0869768	0.0135355	0.102933	0.265184	0.517662	0.153444	0.293197	0.462736	0.465149	0.304124	0.321547	0.171191	0.127077	0.174892	0.409273	0.0571747	-0.127264	-0.523821	0.306229	-0.113882	-0.31591	-0.12124	-0.251915	-0.619119	-0.269957	-0.180275	-0.649183	-0.155405	-0.251325	-0.195835	-0.682153	-0.732192	-0.807402	-0.614512	-0.453328	-0.349117	0.118811	-0.356788	-0.208463	1	X614	Homoscedastic & Parametric	2.53174e-19	0.000121013	0.0368048	0.451591	0.00649838	0.872235	0.640857
HORVU5Hr1G070040.1	0.125978	-0.0724281	0.13354	0.226688	0.56691	0.348253	0.613465	0.566319	0.598618	0.559945	0.429853	0.568117	0.642508	0.265022	0.646614	0.0333514	-0.103591	-0.715739	0.397734	-0.630875	-0.343451	-0.266813	-0.334754	-0.571423	-0.226724	-0.382169	-0.640571	-0.183082	-0.483276	-0.342057	-1.00138	-1.1718	-1.25943	-0.850841	-0.709072	-0.0493851	0.155077	-0.187437	-0.227794	1	X614	Homoscedastic & Non-parametric	6.30284e-14	1.35838e-05	0.484608	0.833494	0.0150618	0.167031	0.166492
HORVU5Hr1G119810.5	0.0887489	0.0398058	0.102294	0.175775	0.573237	0.293097	0.291553	0.429479	0.453495	0.337802	0.148156	0.290272	0.253199	0.0528141	0.458728	-0.0200184	-0.11815	-0.652146	0.304538	-0.4976	-0.392446	-0.328259	-0.379156	-0.778105	-0.561197	-0.413667	-0.857629	-0.234406	-0.521538	-0.385608	-1.11689	-1.23624	-1.34767	-1.2113	-0.813635	-0.322603	0.147528	-0.422143	-0.382151	1	X614	Homoscedastic & Parametric	1.97157e-18	2.92293e-06	0.0491644	0.481871	0.00480172	0.729698	0.294556
HORVU6Hr1G013700.1	0.303604	0.743224	0.489986	0.714302	0.996749	0.835384	0.903538	0.655038	0.919519	0.713218	1.00106	0.796309	0.364368	0.60999	1.09298	-0.22476	-0.31119	-1.22195	0.289769	-0.797999	-0.754588	-0.424955	-0.384749	-0.885617	-0.833277	-0.291907	-1.20433	-0.390682	-0.408475	-0.408552	-1.74464	-1.34156	-2.32637	-1.33831	-1.0854	-0.379722	-0.0581577	-0.502384	-0.302612	1	X614	Homoscedastic & Non-parametric	1.14964e-11	9.76829e-07	0.49862	0.118322	0.000452646	0.061604	0.212761
HORVU0Hr1G020750.15	0.00143225	-0.132446	0.164939	0.16019	0.433208	0.224439	0.643815	0.634915	0.830967	0.500931	0.409402	0.480699	0.256694	0.203387	0.401146	-0.277757	-0.276085	-1.23793	-0.0627304	-0.717309	-0.753675	-0.316631	-0.226614	-0.694872	-0.657265	-0.237174	-1.1645	-0.425086	-0.362728	-0.345051	-1.33334	-1.01947	-1.60212	-0.899371	-0.643824	-0.121053	0.17206	-0.0676199	-0.0440699	1	X614	Homoscedastic & Parametric	4.69443e-16	1.00166e-05	0.0507221	0.575039	0.0911105	0.843335	0.778285
HORVU2Hr1G043900.1	0.123934	0.140333	0.2758	0.343654	0.409318	0.174849	0.31232	0.367437	0.541509	0.45166	0.0753905	0.0202392	0.140883	0.136954	0.458948	-0.0262732	-0.147911	-0.509117	0.124616	-0.478216	-0.513511	-0.433417	-0.461482	-0.538413	-0.722187	-0.247176	-0.798712	-0.414619	-0.33173	-0.262367	-0.651406	-0.590814	-0.900088	-0.660649	-0.430974	-0.0184946	0.266578	-0.35368	-0.338858	1	X614	Homoscedastic & Non-parametric	1.45944e-16	3.81036e-06	0.132341	0.691246	0.053315	0.20209	0.141542
HORVU2Hr1G043890.5	0.0742811	0.106504	0.286298	0.544501	0.627302	0.227163	0.373494	0.596904	0.701627	0.447957	0.199086	0.149427	0.192122	0.15111	0.344537	-0.0943014	-0.293682	-0.656101	0.00694118	-0.436413	-0.681533	-0.521583	-0.486708	-0.89501	-0.845951	-0.333642	-1.09183	-0.359483	-0.404651	-0.491602	-0.921037	-0.719307	-1.24333	-0.865365	-0.580498	-0.0715478	0.462226	0.0200411	0.0631549	1	X614	Homoscedastic & Parametric	2.53477e-18	3.26469e-07	0.0283617	0.863948	0.265166	0.884011	0.284752
HORVU4Hr1G026720.5	0.0466526	0.0151429	0.228958	0.51985	0.842853	0.508519	0.565982	0.660713	0.555155	0.550842	0.459827	0.3605	0.00676505	0.0384954	0.63238	-0.234712	-0.421285	-0.726649	0.277881	-0.821234	-0.52749	-0.458971	-0.336643	-0.75174	-0.695756	-0.524418	-0.79891	-0.308689	-0.711514	-0.451763	-0.883278	-1.00675	-1.37594	-0.878042	-0.563429	-0.0432798	0.285682	-0.12117	-0.0116137	1	X614	Homoscedastic & Non-parametric	4.09502e-14	2.03974e-06	0.0588336	0.195992	0.225177	0.245135	0.0757206
HORVU5Hr1G087760.1	0.191369	0.415874	0.414421	0.733813	0.868587	0.412472	0.563324	0.66586	0.994759	0.788421	0.460148	0.424807	0.551209	0.311985	1.15842	-0.15719	-0.489203	-0.970798	0.201963	-1.05831	-0.83167	-0.66966	-0.613689	-1.00214	-0.952002	-0.633021	-1.42387	-0.675727	-1.01699	-0.810931	-1.38224	-1.64025	-1.76896	-1.22547	-1.0209	0.122111	0.367161	-0.230287	-0.0771988	1	X614	Homoscedastic & Non-parametric	1.78229e-11	3.37307e-07	0.255245	0.495089	0.0571943	0.0347489	0.0320203
HORVU5Hr1G010880.2;HORVU7Hr1G091800.1	-0.139517	-0.0932837	0.110599	0.423911	0.478016	0.216623	0.191084	0.302428	0.319071	0.318606	0.214994	0.165403	0.00521968	0.16908	0.290783	0.002895	-0.386484	-0.634965	-0.05917	-0.251063	-0.244846	-0.312846	-0.375666	-0.679794	-0.42288	-0.402078	-0.814078	-0.509604	-0.505579	-0.429372	-0.947407	-0.921864	-0.860586	-0.924548	-0.593115	-0.0293904	0.206426	-0.127265	-0.0600624	1	X614	Homoscedastic & Parametric	4.63079e-20	2.13835e-06	0.34955	0.904319	0.108637	0.724106	0.333838
HORVU3Hr1G006440.1	-0.007576	-0.183493	0.259072	0.747178	0.663221	0.504062	0.679373	0.612306	0.473108	0.50931	0.416672	0.18569	0.17816	0.12483	0.332998	-0.305455	-0.466402	-1.22456	-0.51445	-0.688787	-0.533865	-0.449125	-0.506603	-0.847956	-0.924695	-0.724305	-1.36355	-0.580951	-0.842414	-0.451666	-1.37289	-1.10203	-1.3567	-0.863978	-0.978611	0.0388334	0.32254	-0.171902	-0.149104	1	X614	Homoscedastic & Non-parametric	4.07382e-14	9.84489e-08	0.345846	0.708924	0.0922504	0.0558085	0.130885
HORVU1Hr1G072250.1	-0.0817806	-0.0112416	0.271565	0.971392	0.82067	0.466821	0.618899	0.714693	0.350968	0.577332	0.620827	0.122316	-0.10281	-0.0237976	0.244812	-0.305971	-0.55602	-1.38803	-0.692731	-0.474262	-0.568076	-0.63466	-0.361705	-0.984718	-0.860124	-0.937894	-1.78965	-0.855124	-0.846787	-0.729438	-1.53964	-1.28598	-1.28714	-0.877247	-0.779219	0.0275256	0.331431	-0.0758305	0.0971834	1	X614	Homoscedastic & Non-parametric	1.21133e-10	2.12379e-05	0.348704	0.633569	0.393104	0.403273	0.464238
HORVU7Hr1G082280.1;HORVU6Hr1G000040.1	0.0531808	0.0359005	0.234521	0.305935	0.488196	0.269876	0.363594	0.456349	0.535554	0.391052	0.26777	0.51984	0.484482	0.433035	0.431281	-0.06932	-0.316012	-0.684407	0.129866	-0.439292	-0.372685	-0.664732	-0.353292	-0.50357	-0.311547	-0.471621	-0.819454	-0.347279	-0.533653	-0.58411	-1.00444	-1.54754	-1.26563	-0.871814	-0.617165	0.0187495	0.355894	0.0654367	0.0109344	1	NA	Homoscedastic & Non-parametric	5.15432e-15	2.02347e-06	0.973034	0.415115	0.0837947	0.360968	0.167243
HORVU7Hr1G009420.4;HORVU7Hr1G009410.1	0.130077	0.381837	0.343012	0.544367	0.310999	0.227257	0.558724	0.332739	0.663622	0.570319	0.374817	0.413138	0.441827	0.602687	0.0820272	-0.241046	-0.164272	-0.510366	0.161515	-0.273255	-0.489345	-0.967729	-0.311738	-0.519566	-0.60263	-0.471433	-0.671465	-0.40355	-0.337569	-0.37251	-1.24108	-1.50134	-1.73932	-1.05906	-0.921974	0.00981358	0.00962192	-0.0641356	-0.37161	1	NA	Homoscedastic & Parametric	1.18392e-20	1.5234e-08	0.540698	0.159695	3.41068e-05	0.528667	0.0759832
HORVU1Hr1G057680.1	-0.241099	-0.367927	0.00212809	0.425414	0.342152	0.359165	0.258087	0.251176	0.45688	0.451502	0.313302	0.297354	0.19414	0.14498	0.0363343	-0.340345	-0.467201	-1.01137	0.0143316	-0.739216	-0.473482	-1.15181	-0.191617	-0.322004	-0.784399	-0.745097	-0.76724	-0.633996	-0.837631	-0.480342	-1.08058	-1.45353	-1.3553	-0.855666	-1.02856	-0.496133	-0.0973721	-0.355923	-0.596401	1	NA	Homoscedastic & Non-parametric	1.81462e-13	2.02479e-05	0.748203	0.646976	0.00320298	0.97179	0.0961105
HORVU4Hr1G072480.1	0.219974	0.572957	0.526424	0.698822	0.621921	0.176393	0.264768	0.273085	0.293945	0.329999	0.0940479	-0.00564328	0.310297	0.223749	0.539963	-0.0808582	-0.108124	0.105959	0.264263	-0.23838	-0.230127	-0.45112	-0.382366	-0.368182	-0.746187	-0.414204	-0.726058	-0.586575	-0.157384	-0.228644	-0.82544	-1.12049	-1.35662	-0.900359	-0.928289	-0.208326	0.266146	-0.399153	-0.613493	1	NA	Homoscedastic & Parametric	4.92552e-17	2.08635e-05	0.895918	0.818391	0.000982145	0.633371	0.145655
HORVU4Hr1G064380.3;HORVU4Hr1G064360.1;HORVU4Hr1G064340.1	0.072806	0.171525	0.27178	0.689975	0.845574	0.664417	0.516194	0.650026	0.620719	0.552655	0.459727	0.37999	0.279278	0.0977745	0.78396	-0.217599	-0.231296	-0.586505	0.378137	-0.790628	-0.658896	-0.433642	0.228555	-0.633203	-1.11255	-0.456274	-0.907679	-0.375676	-0.412766	-0.312251	-1.70989	-1.36281	-2.59858	-1.78303	-1.69043	-0.278613	0.0329406	-0.737534	-0.71585	1	NA	Homoscedastic & Parametric	3.33577e-15	6.29237e-06	0.118364	0.197904	0.000552043	0.969565	0.394147
HORVU2Hr1G010560.1	0.0350253	0.16295	0.209938	0.406258	0.615184	0.526052	0.680271	0.628789	0.632177	0.569852	0.37027	0.649401	0.765876	0.37239	0.582691	-0.217359	-0.0972736	-0.217703	0.372144	-0.820597	-0.316896	-0.671867	-0.410295	-0.674156	-0.384163	-0.661312	-0.575429	-0.148884	-0.713725	-0.536402	-0.746752	-1.85287	-1.73693	-1.56327	-1.37683	-0.273111	-0.159909	-0.375267	-0.722971	1	NA	Homoscedastic & Non-parametric	3.74083e-12	7.65358e-06	0.921199	0.918868	0.000424871	0.194888	0.0441908
HORVU5Hr1G119820.1	0.22613	0.303982	0.217012	0.493904	0.929545	0.574939	0.390481	0.57097	0.596824	0.652964	0.296199	0.346791	0.232225	0.252168	0.697149	-0.0313282	-0.103442	-0.214753	0.601476	-1.01102	-0.582888	-0.575988	-0.62851	-1.40846	-1.20089	-0.725327	-1.0156	-0.367798	-0.883634	-0.617001	-1.49241	-3.05547	-3.04072	-2.75017	-2.59542	-0.806902	-0.384419	-1.42908	-0.981853	1	NA	Homoscedastic & Parametric	7.03401e-15	8.58875e-07	0.0297756	0.291898	1.43622e-05	0.842505	0.147607
HORVU7Hr1G089300.2	0.406023	-0.28171	0.582513	0.140958	0.51277	0.648245	0.72713	0.427479	0.708817	0.349141	0.255663	0.320269	0.521411	0.378099	0.395791	-0.00943592	-0.263847	-0.57804	0.122687	-0.528167	-0.310212	-0.492716	-0.222083	-0.376098	-0.504778	-0.1803	-0.677339	-0.332783	-0.44318	-0.427874	-0.869185	-0.586824	-1.28495	-1.28806	-0.885087	-0.310508	-0.18543	-0.491528	-0.617001	1	NA	Homoscedastic & Non-parametric	8.43825e-15	3.30746e-06	0.548963	0.966	6.28752e-05	0.238872	0.166905
HORVU1Hr1G062030.1	-0.0127996	0.405609	0.488661	0.861212	0.647103	0.774112	0.564898	0.310901	1.08039	0.415768	0.790326	0.520655	0.545421	0.767216	0.876241	-0.20762	-0.656144	-0.727556	-0.102585	-0.563834	-0.551173	-1.08927	-0.328497	-0.936646	-0.719879	-0.80531	-1.09636	-0.931698	-0.783027	-0.711968	-1.22133	-1.44926	-1.6436	-1.66373	-1.71298	-0.0588429	-0.00726129	-0.409662	-0.214256	1	NA	Homoscedastic & Non-parametric	3.42429e-13	4.78289e-08	0.525884	0.780322	0.000273441	0.429589	0.0889862
HORVU5Hr1G005290.1	0.0549095	0.380416	0.313982	0.846415	0.61842	0.687508	0.958899	0.732066	0.325063	0.611846	0.459189	0.177303	0.328579	0.171148	0.477762	-0.264146	-0.397636	-0.488067	-0.222058	-0.693831	-0.464272	-1.03709	-0.365886	-1.02756	-0.730289	-0.650297	-0.600739	-0.481119	-0.697572	-0.456625	-0.937247	-1.21076	-1.30883	-1.11463	-0.853998	-0.189316	-0.0987541	-0.632915	-0.861906	1	X46	Homoscedastic & Non-parametric	3.04026e-14	2.79061e-07	0.530455	0.17084	9.63083e-05	0.377149	0.170596
HORVU7Hr1G083550.1	-0.0452338	-0.0337462	0.339058	0.751807	0.635241	0.589709	0.853154	0.585081	0.47719	0.653441	0.481238	0.404794	0.284298	0.139245	0.526699	-0.248251	-0.458509	-0.806085	-0.0858855	-0.929227	-0.574781	-0.963479	-0.564554	-0.960002	-0.854429	-0.921877	-1.05496	-0.604261	-1.06721	-0.84355	-1.50463	-1.8681	-1.69531	-1.62853	-1.39312	-0.160903	0.046753	-0.55855	-0.676412	1	X46	Homoscedastic & Non-parametric	2.22735e-13	7.81513e-08	0.618718	0.507569	0.000818921	0.0893795	0.0512352
HORVU5Hr1G005180.1	0.231206	0.040475	0.607116	0.978198	0.783061	0.806902	0.878493	0.480022	0.522673	0.621025	0.420877	0.441094	0.34488	0.230149	0.409962	-0.270253	-0.581381	-0.790419	-0.209698	-0.901756	-0.377441	-1.42159	-0.50342	-1.24902	-0.972991	-0.921768	-1.32057	-0.912488	-1.06863	-0.75721	-1.52035	-1.42398	-1.68482	-1.68738	-1.35227	-0.28386	-0.14592	-0.785049	-0.677386	1	X46	Homoscedastic & Non-parametric	9.9925e-13	2.21106e-08	0.97353	0.991071	5.43561e-05	0.0972972	0.00552318
HORVU7Hr1G040730.1	0.0456232	0.293252	0.365285	0.380825	0.410285	0.43132	0.536785	0.205819	0.56653	0.646109	0.30868	0.236485	0.319014	0.385755	0.865101	-0.160857	-0.39182	-0.393127	0.272984	-0.567704	-0.460614	-0.515829	-0.390375	-0.689298	-0.567896	-0.615622	-0.951305	-0.817795	-0.60188	-0.587706	-1.66871	-1.22822	-1.16753	-0.967792	-0.821737	-0.376993	-0.367238	-0.487229	-0.89624	1	NA	Homoscedastic & Non-parametric	5.46849e-14	2.18866e-06	0.73873	0.308928	6.35835e-05	0.386194	0.106065
HORVU7Hr1G018880.1	0.256066	0.201485	0.343293	0.659739	0.824784	0.687402	0.642034	0.623201	0.678745	0.598352	0.501001	0.42909	0.231605	0.258982	0.923701	-0.0378769	-0.1627	-0.717249	0.310928	-0.344435	-0.317031	-0.627238	-0.17167	-1.04583	-0.611719	-0.203677	-1.05629	-0.385749	-0.590021	-0.337575	-1.47179	-1.15631	-1.36171	-1.49744	-1.05774	-0.62856	-0.359957	-0.794086	-0.734318	1	X65	Homoscedastic & Non-parametric	8.2365e-14	8.85021e-07	0.193082	0.188424	1.10847e-05	0.084981	0.045638
HORVU7Hr1G117710.10	0.159591	0.273283	0.401736	0.603543	0.933965	0.481165	0.51102	0.535226	0.79274	0.672392	0.529311	0.431621	0.277935	0.424743	0.93047	-0.0771052	-0.451484	-0.741767	0.396171	-0.694721	-0.733111	-1.11476	-0.488015	-1.21688	-0.577473	-0.470457	-1.06895	-0.585882	-0.630855	-0.596725	-1.43779	-1.92715	-1.4154	-1.9129	-1.55073	-0.744396	-0.389606	-1.00802	-0.915276	1	X65	Homoscedastic & Non-parametric	2.74323e-11	7.45656e-06	0.309511	0.527573	5.5794e-05	0.328865	0.09469
HORVU6Hr1G090510.2	0.350673	0.614995	0.457885	0.695241	1.0568	0.573311	0.605036	0.563128	0.925538	0.847466	0.623134	0.580008	0.310557	0.571118	1.16135	-0.110734	-0.310222	-0.818382	0.567911	-1.00798	-0.885476	-0.678053	-0.414	-1.07052	-0.609872	-0.373751	-1.31947	-0.658185	-0.591411	-0.453619	-1.83297	-1.71143	-1.88759	-1.58977	-1.21564	-1.15354	-0.686174	-1.61704	-1.09854	1	X65	Homoscedastic & Non-parametric	3.18466e-10	8.56643e-06	0.293181	0.370494	9.84698e-06	0.130729	0.0521246
HORVU3Hr1G106140.3	0.0551921	0.14193	0.464601	1.03544	0.85658	0.677318	0.485624	0.587366	0.433965	0.505971	0.234378	0.25777	0.216562	0.160299	0.85164	-0.205256	-0.221618	-0.614781	0.166886	-0.775788	-0.587572	-0.846883	-0.630395	-1.11307	-1.02809	-0.316005	-1.21338	-0.674049	-0.531019	-0.457744	-1.33375	-0.995523	-1.64932	-1.67184	-1.23846	-0.780409	-0.375799	-1.17685	-0.953134	1	X65	Homoscedastic & Non-parametric	3.57786e-11	2.80616e-06	0.827925	0.85831	3.31347e-05	0.0529258	0.0362426
HORVU1Hr1G065150.1	-0.169436	0.670043	0.7027	0.214361	0.321953	0.763766	0.327797	0.501305	0.456773	0.381887	0.583702	0.211975	0.577308	0.616937	1.69638	-0.0346406	-0.459368	-0.406894	-0.153451	-0.61578	-0.574518	-1.94676	-0.325718	-1.0421	-0.811393	-1.20178	-1.47747	-1.38466	-1.34319	-1.18669	-2.07882	-1.94265	-2.22565	-2.39273	-1.96369	-0.888015	-0.684067	-1.29062	-1.4944	1	NA	Homoscedastic & Non-parametric	1.99409e-08	7.48969e-05	0.5574	0.146482	0.000218581	0.420342	0.210473
HORVU7Hr1G036460.1	0.151231	0.010135	0.19291	0.448718	0.48601	0.350571	0.213961	0.486012	0.451246	0.237411	0.0847375	0.503041	0.433634	0.243665	0.416061	-0.035501	-0.290688	-0.517194	-0.0673324	-0.317353	-0.450039	-0.126548	-0.259683	-0.401202	-0.395694	-0.313965	-0.237182	-0.343526	-0.322625	-0.476468	-0.0336921	-0.724506	-0.961518	-0.577851	-0.364744	-0.0962976	0.391554	-0.0123045	-0.230011	1	NA	Homoscedastic & Non-parametric	2.33555e-16	1.26803e-05	0.997303	0.267769	0.0227007	0.452938	0.590405
HORVU7Hr1G114000.2	-0.0982236	-0.224804	-0.00188014	0.136947	0.587141	0.100815	0.195198	0.68877	0.502911	0.264389	0.150271	0.439971	0.119055	-0.0421591	0.297526	0.0535748	-0.263073	-0.115079	0.0905809	-0.665043	-0.51726	-0.548768	-0.475461	-0.87968	-0.386841	-0.262549	-0.669888	-0.201275	-0.351836	-0.435653	-0.410697	-0.593711	-1.17048	-0.853578	-0.411993	-0.0978313	0.435424	0.0950913	-0.0157777	1	NA	Homoscedastic & Parametric	9.99066e-16	0.00024239	0.0342033	0.848639	0.882915	0.739309	0.233933
HORVU7Hr1G036390.1	0.110657	0.12987	0.2579	0.477799	0.553254	-0.0135299	0.621295	0.416597	0.352138	0.15018	0.219278	0.441952	0.46453	0.22488	0.298751	-0.344511	-0.260395	-0.601464	0.0932077	-0.577564	-0.552977	-0.530069	-0.79724	-0.761853	-0.520866	-0.708008	-1.10218	-0.601975	-0.448901	-0.520302	-0.7245	-0.947122	-1.59262	-1.10318	-0.405422	0.0973664	0.434724	0.193175	-0.107345	1	NA	Homoscedastic & Parametric	1.6494e-18	1.15932e-07	0.644944	0.335361	0.0997735	0.34814	0.156592
HORVU3Hr1G031850.2	-0.165893	-0.282776	0.425035	0.521575	0.477249	0.502287	0.283577	0.447246	0.586198	0.174477	0.202628	0.572715	0.615891	0.441507	0.877344	0.230949	-0.140193	-0.768009	-0.0792681	-0.788291	-1.2908	-0.846149	-0.643066	-0.646513	-0.467938	-0.486651	-1.10528	-0.687225	-1.12093	-1.33618	-0.719587	-1.20533	-0.991255	-0.650378	-0.444129	0.257544	0.540812	-0.295494	-0.299071	1	NA	Homoscedastic & Non-parametric	7.56051e-10	3.25933e-05	0.426619	0.523466	0.111275	0.0417886	0.637856
HORVU6Hr1G058930.1	-0.0614966	-0.518775	0.0221173	-0.0925929	0.609508	0.21805	0.481419	0.568632	0.847647	0.518266	0.425952	0.733587	0.55234	0.384473	0.587654	-0.124391	-0.202526	-0.941867	0.305511	-0.621971	-0.447563	-0.253925	-0.353807	-0.624911	-0.330128	0.100646	-0.600105	-0.0859558	-0.102613	-0.189734	-0.84008	-0.736986	-0.815188	-0.604878	-0.512072	-0.53954	-0.105769	-0.222002	-0.43042	1	NA	Homoscedastic & Non-parametric	4.56585e-12	0.000395399	0.368284	0.729622	0.0038027	0.314447	0.347673
HORVU7Hr1G081770.1	-0.0540611	-0.0845926	-0.0380752	0.267193	0.579307	0.180366	0.473884	0.373159	0.81539	0.567615	0.563625	0.517406	0.0836231	0.150673	0.564512	-0.270948	-0.204546	-0.624778	0.452801	-0.744912	-0.890655	-0.136204	-0.520982	-0.893663	-0.742086	-0.104454	-0.800155	-0.105501	-0.291456	-0.137948	-1.01463	-1.13499	-1.88181	-1.09553	-0.860035	-0.501748	0.053596	0.302499	-0.306676	1	X156	Homoscedastic & Parametric	2.3504e-13	0.000411065	0.079571	0.344868	0.151472	0.895081	0.68017
HORVU4Hr1G079230.1	-0.239858	-0.107431	0.00473722	0.266509	0.684771	0.02763	0.350697	0.612405	1.02497	0.548833	0.583212	0.422708	-0.163775	0.154598	0.65677	-0.274374	-0.327473	-0.670147	0.381721	-0.764467	-0.783271	0.0359285	-0.73832	-1.07875	-0.805947	-0.0978662	-0.948475	-0.232585	-0.233384	-0.333872	-0.663122	-1.01295	-1.60126	-1.07376	-0.400599	-0.432846	0.0303329	-0.3778	-0.283006	1	X156	Homoscedastic & Non-parametric	4.61512e-10	0.00109239	0.0745359	0.434849	0.115514	0.246007	0.313243
HORVU5Hr1G055200.4	-0.0421502	-0.457865	-0.484749	0.2765	1.13339	-0.0895403	0.547471	0.759599	0.665732	0.240183	0.451471	0.890358	-0.22723	0.244073	0.628883	-0.228827	-0.217938	-0.621768	0.295747	-1.06644	-0.724268	-0.191565	-1.13872	-1.11011	-0.115204	0.14799	-0.757907	-0.11757	-0.0803065	-0.173768	-0.49071	-1.27981	-1.50429	-1.18382	-0.75628	-1.21479	-0.483768	-0.356634	-0.47738	1	NA	Homoscedastic & Non-parametric	4.17949e-08	0.0146711	0.184211	0.847904	0.0187374	0.536977	0.685933
HORVU7Hr1G113270.8	0.0116125	-0.451897	0.18497	0.193772	0.50577	0.440338	0.571271	0.335029	0.339678	0.301546	0.138311	0.310331	0.290787	-0.0731012	0.662513	-0.0212392	-0.26281	-0.568308	0.408802	-0.313807	-0.020597	-0.796852	-0.219693	-0.631434	-0.194671	-0.382276	-0.68313	-0.425773	-0.673071	-0.312052	-0.660531	-0.472363	-0.422572	-0.768868	-0.319784	-0.367017	0.136586	-0.560866	-0.759649	1	NA	Homoscedastic & Non-parametric	1.99653e-12	0.00131114	0.516334	0.46178	0.0127651	0.807782	0.205892
HORVU7Hr1G007220.1	-0.167979	0.0929107	0.24017	0.172051	0.821383	0.224028	0.523877	0.231313	0.357594	0.636761	0.339346	0.182591	0.100689	0.173493	0.67727	0.0700402	-0.203105	-0.426247	0.51539	-0.618625	-0.434415	-0.0752486	-0.0453944	-0.478121	-0.56307	-0.138669	-0.620534	-0.293025	-0.555249	-0.247803	-0.579087	-0.978797	-1.04636	-0.724721	-0.397761	-0.923463	-0.288248	-0.622582	-0.772579	1	NA	Homoscedastic & Parametric	2.2397e-14	0.000662541	0.0970573	0.14556	0.000625473	0.823292	0.595724
HORVU1Hr1G022020.1	-0.0637028	0.367719	0.014043	0.459772	0.557161	0.207703	0.397557	0.481736	0.192332	0.265774	0.212109	0.0574317	-0.0986464	0.0249031	0.377669	-0.165197	-0.229789	-0.234086	0.234215	-0.558439	-0.439843	-0.355803	-0.337259	-0.694399	-0.336397	-0.339208	-0.593379	-0.312021	-0.510468	-0.356195	-0.425698	-0.840548	-0.79895	-0.643021	-0.0984541	-0.537333	-0.146847	-0.434747	-0.473039	1	NA	Homoscedastic & Non-parametric	1.00554e-15	8.93093e-05	0.157602	0.135309	0.00257146	0.450653	0.264985
HORVU1Hr1G043910.1	0.095037	-0.320463	0.483795	0.843224	0.887545	0.358771	0.698025	0.625176	0.137131	0.261084	0.0387713	0.356227	0.192783	0.0192189	0.0750324	-0.233489	-0.329811	-0.884658	-0.452022	-0.545109	-0.563846	-0.453592	-0.592656	-0.83676	-0.520272	-0.807874	-1.17241	-0.654962	-0.589518	-0.550179	-0.962302	-0.838032	-1.08284	-0.799281	-0.547981	-0.653875	-0.36049	-0.856861	-0.914989	1	NA	Homoscedastic & Non-parametric	1.25323e-12	3.89883e-06	0.876799	0.282796	2.29356e-05	0.284437	0.300973
HORVU3Hr1G006100.1;HORVU3Hr1G006140.1	0.195001	-0.108336	0.519517	1.04969	0.849742	0.769104	0.755486	0.582144	0.291977	0.606744	0.47338	0.2395	0.0575768	0.0886558	0.310508	-0.0517706	-0.0265017	-0.36064	0.0164191	-0.102868	-0.247153	0.0786396	0.0555247	-0.188451	-0.288656	-0.070575	-0.162414	-0.27658	0.0406248	-0.0115402	-1.21992	-0.839302	-1.40528	-0.76328	-0.413833	-0.70934	-0.292166	-1.12684	-0.929287	1	NA	Homoscedastic & Parametric	4.4556e-14	0.00491927	0.589662	0.829717	3.66334e-05	0.870404	0.9654
HORVU1Hr1G089380.1	0.168852	-0.00172378	0.0559293	0.501168	0.372272	0.303048	0.478289	0.175322	0.39218	0.228183	0.186336	0.373162	0.223731	0.184028	0.0762979	-0.0781731	-0.0571679	-0.276562	0.205577	0.0860251	0.0239628	-0.0365751	-0.122148	-0.292312	-0.315368	-0.280095	-0.532025	-0.277972	-0.184978	-0.0729865	-0.814303	-0.79019	-1.03678	-0.59909	-0.205522	-1.12021	-0.628919	-1.01315	-0.984381	1	NA	Homoscedastic & Parametric	2.20677e-20	6.86928e-05	0.954863	0.551533	2.75244e-09	0.591	0.136304
HORVU7Hr1G059330.1	-0.0745736	-0.133077	0.058131	-0.208254	0.228988	0.0417768	0.203903	0.143478	0.520697	0.519185	-0.121151	0.418566	0.568926	0.163086	0.534255	0.0226817	0.190018	0.000686735	0.643169	-0.721197	-0.431038	-0.277026	-0.220607	-0.34768	-0.454779	0.155567	-0.39631	-0.039768	-0.221316	-0.172744	-0.857337	-0.505265	-1.04476	-0.659408	-0.499663	-0.720322	-0.202659	-0.853713	-1.11065	1	NA	Homoscedastic & Parametric	4.40774e-14	0.00237111	0.699892	0.548912	0.000321554	0.238662	0.069015
HORVU4Hr1G001710.1	0.0396166	-0.0340833	0.184967	0.423651	0.588797	0.359719	0.353722	0.337404	0.244674	0.174841	0.0122757	0.339089	0.136661	-0.0219528	0.306686	0.00350196	-0.0549033	-0.423572	0.219825	-0.236921	-0.292339	-0.0816197	-0.166468	-0.449012	-0.219842	-0.0859913	-0.338468	-0.00337015	-0.0457061	-0.16223	-0.711846	-0.85972	-0.950767	-0.825225	-0.594757	-0.505724	-0.108919	-0.570675	-0.444621	1	NA	Homoscedastic & Parametric	8.93373e-20	0.000268342	0.48226	0.911786	3.5191e-05	0.515093	0.529447
HORVU5Hr1G093700.3	0.0106092	-0.121651	0.240022	0.259724	0.559892	0.233116	0.443166	0.39317	0.710771	0.449609	0.314164	0.477503	0.246865	0.331773	0.532431	0.0618844	-0.013532	-0.613641	0.361112	-0.162067	-0.416828	0.0110931	-0.124578	-0.347137	-0.199562	0.104356	-0.597026	0.108982	0.121074	-0.105998	-1.13925	-0.980846	-1.10095	-0.831275	-0.721848	-0.62792	-0.273889	-0.475338	-0.6499	1	NA	Homoscedastic & Parametric	1.39697e-17	0.000629979	0.257457	0.887268	2.09488e-05	0.661624	0.670496
HORVU2Hr1G089940.1;HORVU2Hr1G089820.6	-0.0403574	-0.215927	-0.103472	0.122504	0.672256	0.124698	0.463952	0.521279	0.678109	0.443017	0.380314	0.435587	0.12296	0.0906513	0.456973	-0.113025	-0.00647702	-0.873924	0.423201	-0.596494	-0.583561	-0.0716525	-0.365727	-0.738988	-0.456133	0.037721	-0.668444	-0.119889	-0.153266	-0.159515	-1.05304	-1.51455	-1.31169	-0.95677	-0.680788	-0.627541	-0.205986	-0.395816	-0.598337	1	NA	Homoscedastic & Parametric	2.42056e-14	0.00179959	0.02058	0.421329	0.00559365	0.872664	0.785537
HORVU2Hr1G103310.2	0.0265851	0.0164337	0.1398	0.0963228	0.404528	0.216794	0.275204	0.547704	0.589723	0.350602	0.167411	0.463532	0.616109	0.246104	0.725736	0.160107	0.0787058	-0.323759	0.4901	-0.337343	-0.262785	-0.198652	-0.177275	-0.193496	-0.219074	0.128222	-0.434098	0.0419545	-0.109834	-0.192296	-1.06159	-0.773886	-1.04623	-0.773834	-0.443806	-0.437735	-0.00570276	-0.501574	-0.728761	1	NA	Homoscedastic & Parametric	2.49847e-16	0.000868917	0.57942	0.8494	0.000260209	0.414082	0.378125
HORVU7Hr1G042240.1	-0.0275644	-0.262875	0.0205607	-0.0140689	0.447043	0.228776	0.433614	0.468141	0.510357	0.337222	0.163179	0.497579	0.398211	0.0480854	0.39532	0.127754	0.112408	-0.282214	0.363405	-0.382538	-0.302691	-0.502054	-0.219224	-0.297421	-0.237089	0.0205466	-0.330021	0.0715287	-0.118491	-0.206776	-1.01575	-0.76699	-1.01526	-0.755679	-0.570623	-0.3824	-0.0751256	-0.48671	-0.486652	1	NA	Homoscedastic & Parametric	1.209e-16	0.00306909	0.209652	0.964588	0.00171976	0.833039	0.509682
HORVU1Hr1G043920.1	0.025573	-0.17608	0.206753	0.169171	0.42993	0.210205	0.286277	0.607203	0.607481	0.295158	0.0558122	0.450906	0.342254	0.245766	0.659049	0.212278	-0.205417	-0.482134	0.276913	-0.59155	-0.525865	-0.467446	-0.343529	-0.411414	-0.201153	-0.373177	-0.641831	-0.258637	-0.590048	-0.278815	-0.968543	-1.1398	-1.24284	-1.23488	-0.85762	-0.62852	-0.197894	-0.637452	-0.899693	1	NA	Homoscedastic & Parametric	1.35041e-16	5.3955e-05	0.321582	0.685866	3.86297e-05	0.767363	0.263929
HORVU1Hr1G075160.4	0.242659	-0.0774317	0.256317	0.280599	0.430261	0.178625	0.577256	0.453438	0.465299	0.26305	0.173119	0.614401	0.731034	0.470646	0.229201	0.0455437	-0.0215359	-0.371287	0.0900197	-0.38117	-0.216304	-0.173357	-0.454161	-0.3953	-0.155837	-0.0384284	-0.393849	-0.115496	-0.156357	-0.280633	-0.784335	-0.989915	-1.40001	-1.23075	-0.796119	-0.752076	-0.115132	-0.633346	-0.72081	1	X400	Homoscedastic & Parametric	3.65201e-21	1.22121e-07	0.244237	0.0135209	8.16345e-09	0.0509684	0.0412138
HORVU4Hr1G085050.1	0.275219	-0.126929	0.449586	0.290773	0.555591	0.307758	0.555411	0.66652	0.677292	0.503526	0.265188	0.504695	0.488638	0.456079	0.236889	0.197548	0.00959766	-0.409601	0.133348	-0.269506	-0.186084	-0.156491	-0.215111	-0.151115	-0.174434	0.0306047	-0.230707	0.0763291	-0.0196108	-0.154145	-1.13802	-1.15634	-1.47292	-1.522	-1.094	-1.19354	-0.716468	-0.99208	-1.29595	1	X400	Homoscedastic & Parametric	1.45532e-22	5.4762e-07	0.185703	0.0435868	2.85397e-12	0.747551	0.13074
HORVU6Hr1G062980.1;HORVU0Hr1G032130.2	0.074499	0.0982156	0.0817891	0.164659	0.368068	0.212295	0.558982	0.351654	0.747289	0.530088	0.516246	0.404169	0.188202	0.313366	0.650102	-0.0565379	0.12712	-0.0531675	0.692961	-0.565524	-0.367294	-1.16705	-0.369907	-0.586139	-0.223321	-0.000403184	-0.432044	-0.101633	0.0332065	-0.0683753	-0.894751	-1.93436	-1.422	-1.52109	-1.21554	-0.827655	-0.751549	-0.762875	-0.935888	1	NA	Homoscedastic & Parametric	7.07519e-14	0.00605639	0.198077	0.219568	0.000116953	0.675333	0.744683
HORVU2Hr1G018480.1;HORVU2Hr1G044340.1;HORVU2Hr1G018510.1	0.177487	0.263397	0.242814	-0.309332	0.360653	0.179302	0.558285	0.0190134	0.936733	0.498693	0.244325	0.653134	1.04025	0.543752	1.25698	-0.314236	-0.380564	-0.132587	0.799439	-0.771457	-0.436933	-0.733724	-0.371885	-0.483827	-0.457245	0.0369099	-0.457861	-0.464697	-0.355966	-0.391939	-0.958886	-1.06386	-1.24973	-1.15963	-0.842498	-1.2872	-0.727433	-0.942834	-1.26449	1	NA	Homoscedastic & Non-parametric	3.11229e-09	0.000940704	0.78971	0.810536	7.11043e-05	0.518677	0.140844
HORVU2Hr1G124970.2	0.119286	0.221018	0.356088	0.199603	0.36257	0.457302	0.746738	0.279578	0.575771	0.53791	0.307864	0.447316	0.521875	0.340367	0.814812	-0.116304	-0.107715	-0.272427	0.597436	-0.401219	-0.160816	-0.447631	-0.474485	-0.529057	-0.317918	-0.248167	-0.523253	-0.226207	-0.512191	-0.326047	-1.12572	-1.20906	-0.966372	-1.24387	-1.05118	-0.736372	-0.582882	-0.898706	-1.11066	1	NA	Homoscedastic & Parametric	3.24669e-17	1.07002e-05	0.949905	0.194301	4.42476e-07	0.442441	0.620458
HORVU2Hr1G024280.2	0.385272	0.014007	0.377767	-0.17176	0.404534	0.183041	0.583263	0.12218	0.518727	0.194266	0.0284125	0.636597	0.533523	0.256576	0.624587	-0.118362	-0.455904	-0.330747	0.71239	-0.931071	-0.578243	-0.108868	-0.537657	-0.77113	-0.314286	-0.157541	-0.55279	-0.515031	-0.478342	-0.502468	-1.42268	-1.81417	-1.49835	-1.44506	-1.47995	-1.39842	-0.960584	-0.805474	-0.773969	1	NA	Homoscedastic & Parametric	2.52266e-14	8.65938e-05	0.896924	0.794309	9.21704e-06	0.331822	0.166602
HORVU4Hr1G090050.3	-0.00643392	-0.113617	0.281299	-0.133909	0.408307	0.494449	0.547638	-0.0288211	0.658436	0.399251	0.233887	0.768089	0.484031	0.20837	0.489824	-0.026917	-0.26775	-0.284893	0.288285	-0.597293	-0.393808	-0.629894	-0.453215	-0.600834	-0.288961	-0.448039	-0.791342	-0.596588	-0.689409	-0.674441	-0.642361	-1.24878	-0.929356	-0.943005	-0.87499	-0.596885	-0.752944	-0.685494	-0.64272	1	NA	Homoscedastic & Non-parametric	4.81659e-13	2.07612e-05	0.808497	0.990984	2.71557e-05	0.253353	0.12197
HORVU7Hr1G040740.1	0.278272	0.742559	0.518228	0.552977	0.678256	0.712742	0.773732	0.16832	0.435152	0.714963	0.303304	-0.0632974	0.317792	0.237054	1.2354	-0.12265	-0.355962	-0.204725	0.476201	-0.922098	-0.516235	-1.27857	-0.642584	-1.38868	-1.07829	-0.712357	-0.918999	-0.703865	-0.668404	-0.507823	-1.57656	-0.879671	-2.39178	-2.62286	-2.62045	-1.87774	-1.49034	-1.59115	-1.78775	1	NA	Homoscedastic & Non-parametric	2.58751e-08	0.000296198	0.61217	0.116817	3.36343e-05	0.288644	0.0899837
HORVU0Hr1G000760.1;HORVU1Hr1G065660.1;HORVU0Hr1G000850.1	-0.295966	0.0275191	0.589606	0.327123	0.458314	0.196022	-0.0138872	0.4225	0.15028	-0.00365599	0.151211	0.211999	0.149942	0.324777	-0.0509862	0.0908353	-0.370164	-0.399343	-0.653518	0.0521819	-0.484152	0.0130948	-0.392051	-0.206518	-0.423934	-1.39332	-1.08744	-0.697108	-0.8219	-1.41615	-1.14787	-2.50509	-2.28194	-0.295602	0.459752	0.495316	0.0590473	-0.0898829	-0.325187	1	NA	Homoscedastic & Parametric	7.94586e-12	0.0041522	0.448412	0.220337	0.249674	0.502798	0.611056
HORVU1Hr1G065670.1;HORVU0Hr1G000840.1;HORVU0Hr1G000780.2	-0.223013	0.16213	0.440537	0.438836	0.323791	0.52973	0.230698	0.27273	0.459627	0.285994	0.167357	0.194876	0.229129	0.358866	0.32147	-0.0215975	-0.117043	0.0257975	-0.0548205	0.139114	0.0654536	-0.717278	-0.177022	-0.164582	-0.442207	-0.652994	-0.765588	-0.639912	-0.650072	-0.570083	-0.821178	-0.876684	-1.00407	-0.672227	-0.489639	0.271022	0.3552	-0.0627814	-0.334376	1	NA	Homoscedastic & Non-parametric	1.41852e-13	0.000441951	0.568808	0.775719	0.162381	0.999206	0.227794
HORVU2Hr1G120530.1	-0.0741405	-0.345439	0.143022	1.04407	1.03872	0.544097	0.31233	0.429922	0.264506	0.146619	-0.168076	0.557282	0.188189	-0.00606929	0.216485	0.00369204	-0.361311	-1.40871	-0.858149	-0.586812	-0.537044	-0.823173	-0.584522	-0.80814	-0.370174	-1.62185	-1.52008	-0.549568	-1.71541	-1.14378	-2.00498	-3.36188	-0.868714	-1.31366	-1.15591	-0.137147	0.266929	-0.479222	-0.789175	1	NA	Homoscedastic & Non-parametric	3.87251e-07	0.00104416	0.939614	0.373111	0.0734971	0.336405	0.634844
HORVU1Hr1G001570.1	-0.132436	0.472648	-0.199557	0.26697	0.241528	-0.104603	0.0241431	0.0396676	0.118312	-0.109392	0.0540899	0.187751	-0.579069	-0.0569393	0.0958741	0.0679557	0.14217	-0.525832	0.108841	-0.202516	-0.367957	-0.541756	-0.25525	-0.612183	-0.131775	-0.586077	-0.852869	-0.334917	-0.247815	-0.122185	-0.631398	-0.938389	-0.614298	-0.888518	-0.510311	-0.528562	0.0707284	-0.229217	0.00995689	1	NA	Homoscedastic & Parametric	1.8877e-14	0.0564262	0.572768	0.250694	0.535492	0.810293	0.863601
HORVU1Hr1G049280.1	0.366229	0.659539	0.51512	0.540503	0.395795	0.0807876	-0.340933	-0.0182058	0.204004	0.233571	0.104791	-0.123941	-0.306538	0.591494	0.504787	0.395518	-0.0669771	0.863459	0.441543	0.159647	-0.242504	-0.0869092	-0.454122	-0.677379	-0.978433	-0.91491	-1.29134	-1.22755	0.0352512	0.178072	-0.86722	-1.04813	-1.85253	-0.930282	-0.673554	-1.11159	-0.134704	-1.01714	-1.26056	1	NA	Homoscedastic & Parametric	2.9276e-10	0.0156013	0.837311	0.838302	0.00290998	0.615272	0.084547
HORVU0Hr1G011720.5	-0.160631	0.592028	0.944175	0.854396	0.157436	0.0578151	-0.110515	-0.066489	0.00748997	-0.04963	-0.073294	-0.471	0.486788	0.767727	0.373719	-0.0212031	-0.198593	1.01133	-0.0389664	-0.290476	-0.242642	-0.500531	-0.284513	-0.342032	-0.617654	-0.724435	-1.00493	-1.16343	0.184103	-0.139694	-0.65191	-0.84626	-1.12056	-0.941553	-0.658379	-1.30021	-0.565886	-1.03807	-1.49741	1	NA	Homoscedastic & Non-parametric	7.1532e-09	0.00192824	0.0294713	0.137823	6.5128e-05	0.382297	0.0197742
HORVU7Hr1G117850.1	0.462045	-0.268709	0.282577	0.0813365	0.531274	0.160032	0.092396	0.502385	0.505059	0.174377	-0.228372	0.215813	0.203082	-0.00214751	0.777399	0.0158502	-0.0765227	-0.477283	0.291231	-0.876569	-0.796835	-1.494	-0.60771	-0.915293	-0.578589	-0.0703298	-0.620896	-0.0732462	-0.65936	-0.897646	-0.302889	-0.382949	-0.728762	-0.381628	-0.390594	0.0921261	0.409874	-0.0886184	-0.215288	1	NA	Homoscedastic & Parametric	5.25237e-13	0.000595623	0.0822174	0.994984	0.63515	0.989851	0.473209
HORVU2Hr1G074770.3	-0.425316	-0.0846469	0.168073	-0.321681	0.276023	-0.486313	0.0274412	-0.0559753	0.54702	-0.0422473	-0.3723	0.648871	0.738438	0.292645	0.491311	-0.504251	-1.04549	-1.04926	-0.119541	-1.24206	-1.15313	-1.08729	-1.20169	-1.19228	-0.407343	-0.793992	-1.06883	-1.00697	-1.18731	-1.47468	-0.260843	-0.491061	-0.210092	-0.212203	-0.255621	0.907869	0.773772	0.704215	0.667438	1	NA	Homoscedastic & Non-parametric	8.68997e-10	3.16724e-05	0.289744	0.108246	0.108132	0.387091	0.344774
HORVU3Hr1G060920.3	-0.42943	-0.161831	-0.157654	0.0038116	0.0243526	0.00157553	-0.00562084	0.259715	0.294592	0.0420508	-0.00385299	0.118002	0.161939	-0.0673743	0.15699	-0.0973628	-0.626412	-0.684974	-0.265538	-0.0997513	-0.176715	-0.493409	-0.650104	-0.487143	-0.229814	-0.237285	-0.840147	-0.637626	-0.507513	-0.517857	0.847441	0.697381	-0.145609	0.397483	0.926425	0.380489	0.713265	-0.116238	0.0945731	2	NA	Homoscedastic & Non-parametric	2.31234e-13	0.0176244	0.795915	0.926681	0.116783	0.910837	0.915207
HORVU5Hr1G045770.1;HORVU5Hr1G113060.1	-0.302848	-0.937784	-0.0425654	0.281376	-0.0217314	0.159828	-0.101539	0.242661	0.00624868	-0.733307	-0.2924	0.49161	0.00885123	0.0695548	-0.373223	-0.230886	-0.499102	-0.767408	-0.532776	-0.464768	-0.32057	-0.360126	-0.429114	-0.417632	-0.328693	-0.733845	-0.870422	-0.618686	-0.898718	-0.485431	0.708474	0.593016	0.201772	0.438351	1.06749	0.504548	1.07761	0.783288	0.339244	2	NA	Homoscedastic & Non-parametric	1.94186e-12	0.000458394	0.111377	0.0237128	0.0106985	0.178189	0.091799
HORVU6Hr1G064620.1	-0.469356	-1.01547	-0.145077	0.145935	-0.0777427	0.0347048	0.0593445	0.271265	0.166036	-0.0552769	-0.124004	0.440091	0.201066	-0.129278	-0.264053	-0.373644	-0.427963	-0.771123	-0.365044	-0.561498	-0.428224	-0.486309	-0.817771	-0.558706	-0.215979	-0.318506	-0.73675	-0.48405	-0.847581	-0.774502	0.598298	0.219783	0.145397	0.0908427	0.779476	0.503986	0.808609	0.403533	0.305356	2	NA	Homoscedastic & Parametric	3.25303e-14	0.00135336	0.427192	0.0646005	0.00895948	0.315764	0.233588
HORVU0Hr1G008880.4	-1.26492	-0.354146	-0.378696	-0.0751047	-0.333696	-0.222253	-0.0552241	-0.198651	-0.032558	-0.142027	-0.267703	0.0437839	-0.215345	-0.091834	-0.222178	0.0642008	-0.643416	-0.533277	-0.477231	0.0840382	0.00964378	-0.14173	-0.313203	-0.216995	0.0910985	-0.222705	-0.556533	-0.641151	-0.713117	-0.82781	0.636738	1.16472	-0.106837	0.405423	0.598086	0.706211	1.23383	0.260586	-0.466365	2	NA	Heteroscedastic & Non-parametric	8.20307e-10	0.706093	0.406832	0.721362	0.00995593	0.693414	0.757514
HORVU2Hr1G004230.5	-0.418717	-0.349327	-0.367924	-0.0554039	0.0596301	-0.363809	-0.497635	-0.442789	-0.00788931	-0.310725	-0.203	-0.245265	-0.465948	0.134603	-0.582827	-0.0689334	-0.315977	-0.182371	-0.0839208	-0.345608	-0.486507	0.0894366	-0.235032	0.0241853	-0.36367	0.0875077	-0.504314	-0.417881	-0.28419	-0.448279	0.856091	0.61321	0.271036	0.411679	0.767979	0.514529	1.02254	0.271532	0.0963042	2	NA	Homoscedastic & Non-parametric	2.45096e-14	0.519383	0.87134	0.183591	0.000193645	0.368504	0.330388
HORVU2Hr1G028580.1	-0.385909	-0.365154	-0.451495	-0.432674	-0.417068	-0.358521	-0.396717	-0.205515	-0.29633	-0.427879	-0.317613	-0.208794	-0.30153	-0.42292	-0.296148	-0.219547	-0.183637	-0.217094	0.182315	-0.264803	-0.38488	-0.01564	-0.191759	-0.448758	-0.384267	0.0187055	-0.266505	-0.219551	-0.0610861	-0.0244286	0.562293	0.440639	0.167158	0.457629	0.801864	0.496312	0.971321	0.699867	0.843009	2	X733	Homoscedastic & Non-parametric	1.18229e-19	0.417074	0.869839	0.88834	3.86487e-11	0.349987	0.322653
HORVU3Hr1G065420.1	-0.494467	-0.655293	-0.493625	-0.320666	-0.296911	-0.230136	-0.040714	-0.595326	-0.366287	-0.639117	-0.234457	-0.0422637	-0.688691	-0.549223	-0.506693	-0.356737	-0.347977	-0.288253	-0.00595505	-0.265752	-0.295524	0.0163331	-0.315722	-0.344664	-0.41999	-0.173463	-0.535144	-0.322003	-0.448661	-0.186529	0.936055	0.662228	0.312242	0.307816	0.801015	0.295441	0.735275	0.687493	0.779873	2	X733	Homoscedastic & Non-parametric	1.48193e-16	0.991412	0.580107	0.5132	4.00193e-08	0.197822	0.593893
HORVU3Hr1G018530.3	-0.487335	-0.044738	-0.553995	-0.201305	-0.359184	-0.371786	-0.490985	-0.745786	-0.511766	-0.772316	-0.468269	-0.325783	-0.723099	-0.490825	-0.338462	-0.38452	-0.617193	0.00943774	-0.0924209	-0.155478	-0.342989	-0.162978	-0.514471	-0.544967	-0.538754	-0.592986	-0.827458	-0.986817	-0.562512	-0.305225	1.08526	0.775431	0.363937	0.624409	1.0523	0.739883	1.11835	0.309438	0.853626	2	X733	Heteroscedastic & Non-parametric	3.19753e-14	0.692848	0.44986	0.468662	1.22824e-07	0.63697	0.483202
HORVU6Hr1G026810.3	-0.480876	-0.473309	-0.314128	-0.438869	-0.393917	-0.308786	-0.499338	-0.4056	-0.14727	-0.588525	-0.429509	-0.328437	-0.533767	-0.258462	-0.20138	-0.0798651	-0.232871	-0.0934597	-0.160661	-0.158363	-0.438344	-0.368136	-0.697972	-0.547961	-0.586652	-0.308318	-0.818764	-0.887643	-0.441775	-0.182025	1.15369	0.568286	0.36361	0.811001	1.46133	0.635944	1.09125	0.636608	0.360611	2	X733	Heteroscedastic & Non-parametric	1.5632e-13	0.461505	0.88356	0.96789	2.48591e-06	0.473443	0.38696
HORVU4Hr1G057740.1	-0.593572	-0.5561	-0.494439	-0.557753	-0.721443	-0.38542	-0.391807	-0.81204	-0.444593	-0.818115	-0.473619	-0.470277	-0.939012	-0.425601	-0.516374	-0.463628	-0.538598	-0.391457	-0.166577	-0.439195	-0.691771	-0.254759	-0.575853	-0.732886	-0.860614	-0.557515	-1.01506	-0.949052	-0.688625	-0.32798	1.15081	0.857375	0.4974	0.799475	1.31314	0.401767	1.05085	1.02052	0.797628	2	X733	Heteroscedastic & Non-parametric	1.6082e-15	0.23563	0.456809	0.463914	1.58596e-09	0.132466	0.269718
HORVU5Hr1G103430.2	-0.367967	-0.576163	-0.425478	-0.281673	-0.65689	-0.447473	-0.702708	-0.499087	-0.502538	-0.831715	-0.598394	-0.824355	-0.841574	-0.465624	-0.397916	0.108266	0.0107647	-0.171639	-0.190119	0.0115235	-0.283783	0.0344571	-0.509543	-0.266226	-0.331214	-0.0599345	-0.672083	-0.5306	-0.351308	-0.124167	0.91459	1.01944	0.21517	0.628697	1.32554	0.317179	0.725361	0.432512	0.0651768	2	X332	Heteroscedastic & Non-parametric	2.37787e-14	0.122686	0.934918	0.948386	4.09729e-06	0.324553	0.85622
HORVU1Hr1G049190.1	-0.384507	-0.50524	-0.591916	-0.516512	-0.4793	-0.510305	-0.715463	-0.719985	-0.187304	-0.590821	-0.448811	-0.487921	-0.982996	-0.187047	-0.795189	0.00681982	-0.393308	-0.0139418	0.0792242	-0.118128	-0.401896	0.108556	-0.265254	-0.160565	-0.450974	-0.312336	-0.389364	-0.426745	-0.424647	-0.00517045	0.829554	0.995951	0.0850253	0.548108	1.07719	0.253801	0.81852	0.275722	0.0998147	2	X332	Homoscedastic & Non-parametric	5.75611e-14	0.1604	0.660894	0.719212	1.1372e-05	0.898986	0.311607
HORVU4Hr1G059260.3	-0.602863	-0.442379	-0.346836	0.295676	-0.229269	-0.142181	-0.0537409	0.0154666	-0.0847903	-0.273036	-0.0182614	-0.161565	-0.286204	-0.322476	-0.216279	-0.53507	-0.572599	-0.379443	0.0116407	-0.234594	-0.237056	-0.361665	-0.342485	-0.423299	-0.591722	-0.38517	-0.445366	-0.278076	-0.552043	-0.324939	0.487638	1.1831	0.114997	0.229928	0.964797	0.24244	0.81294	0.35814	0.117132	2	NA	Heteroscedastic & Non-parametric	1.58376e-13	0.0804324	0.644791	0.886518	0.00387935	0.691925	0.330041
HORVU1Hr1G070690.1	-0.611111	-1.04609	0.0845534	0.220803	-0.14055	-0.0570431	-0.192382	-0.00273677	-0.103042	-0.651977	-0.136084	-0.11708	-0.816445	-0.482628	-0.655857	-0.301161	-0.472818	-0.175954	-0.132888	-0.131456	-0.291467	-0.147808	-0.374992	-0.18839	-0.281723	-0.287155	-0.848245	-0.845844	-0.586669	-0.349261	0.676093	0.819094	0.448215	0.514905	0.922039	0.716534	1.09945	0.258366	0.334916	2	NA	Homoscedastic & Non-parametric	6.4248e-12	0.284822	0.595669	0.311699	0.000483399	0.749199	0.250644
HORVU4Hr1G010750.1	-0.567216	-0.953428	-0.351724	0.314287	-0.137438	-0.192137	-0.228768	-0.224597	0.0460061	-0.301331	-0.125561	-0.323357	-0.766653	-0.359908	-0.991376	-0.476167	-0.732873	-0.355416	-0.297044	-0.205375	-0.0994401	-0.459129	-0.403441	-0.149427	-0.427787	-0.273194	-0.62988	-0.568402	-0.76381	-0.418571	0.719085	1.34121	0.604814	0.724738	1.15993	0.615912	0.943463	0.685135	0.0915689	2	NA	Homoscedastic & Non-parametric	5.14654e-12	0.399318	0.871685	0.314087	0.000231617	0.677981	0.272006
HORVU3Hr1G066340.2	-1.18112	-1.13005	-0.601811	0.255172	-0.73913	-0.30169	-0.231438	-0.384069	-0.39892	-0.769107	-0.192327	-0.353295	-1.06729	-0.942037	-1.08868	-0.86652	-1.09535	-1.1399	-0.879226	-0.143198	-0.184455	-0.512376	-0.400797	-0.103331	-0.441329	-0.174646	-1.13668	-1.0591	-0.980465	-0.512926	1.28516	1.86122	0.984469	0.883908	1.43128	0.59184	0.714105	0.505394	0.0253351	2	NA	Homoscedastic & Non-parametric	9.89414e-09	0.881494	0.444483	0.797912	0.00309732	0.993309	0.962061
HORVU4Hr1G050210.1	-0.386108	-0.814161	0.0224847	0.25082	-0.266871	-0.174699	-0.028397	-0.318044	-0.0907874	-0.387043	-0.107926	-0.232405	-0.697391	-0.283126	-0.678085	-0.473533	-0.73836	-0.56647	-0.329882	-0.296431	-0.375778	-0.205887	-0.302614	-0.23937	-0.398666	-0.320322	-0.663585	-0.603695	-0.579021	-0.5548	0.97388	1.33845	0.738331	0.27231	0.794113	0.329913	0.775517	0.585207	0.246037	2	NA	Homoscedastic & Non-parametric	1.87913e-13	0.112906	0.433278	0.307638	0.000965318	0.704268	0.483973
HORVU4Hr1G051780.1	-0.583657	-1.12872	-0.297265	0.421366	-0.604915	-0.336038	-0.217946	-0.327914	-0.428964	-0.63798	-0.0961932	-0.406339	-0.822546	-0.594052	-0.881455	-0.609078	-0.43177	-0.651542	-0.392052	-0.363527	-0.433355	-0.308149	-0.546928	-0.178567	-0.236122	-0.0533183	-0.849317	-0.889963	-0.188582	-0.614645	1.13706	1.26444	0.787738	0.430167	0.889844	0.560592	0.861344	0.868682	0.409048	2	NA	Homoscedastic & Non-parametric	1.98801e-11	0.732646	0.245972	0.31529	0.000154912	0.600278	0.955249
HORVU2Hr1G026810.1	-1.06244	-1.1252	-0.277443	0.155393	-0.68005	-0.464941	-0.365335	-0.528955	-0.212435	-0.795755	-0.358108	-0.159604	-0.655585	-0.494741	-0.830532	-1.11044	-1.46323	-1.17573	-0.791936	-0.554997	-0.696809	-1.14324	-0.886122	-0.472709	-0.496701	-0.516088	-1.12325	-1.29174	-1.12113	-0.87393	1.15369	1.61912	1.00096	0.837883	1.53528	0.895991	1.21723	0.73318	0.472568	2	NA	Heteroscedastic & Non-parametric	2.11763e-11	0.0305328	0.0789984	0.10397	3.17564e-05	0.770788	0.668901
HORVU3Hr1G071490.2	-0.678615	-0.799119	-0.31665	-0.142493	-0.533319	-0.380186	-0.305947	-0.431625	-0.0273275	-0.648732	-0.322142	-0.145519	-0.442889	-0.521408	-0.508153	-0.450696	-0.657652	-0.64755	-0.394969	-0.369675	-0.27196	-0.353336	-0.402421	-0.225648	-0.258359	-0.283332	-0.787526	-0.729205	-0.608607	-0.438451	0.865482	1.11972	0.57514	0.385544	0.904288	0.693156	1.06279	0.771633	0.611772	2	NA	Homoscedastic & Non-parametric	1.20666e-15	0.357187	0.3236	0.295696	6.78275e-08	0.675869	0.439704
HORVU5Hr1G069360.4	-0.360319	-0.891077	-0.284669	-0.0673767	-0.438704	-0.347158	-0.25626	-0.382736	-0.106195	-0.561455	-0.339178	-0.217171	-0.57039	-0.444672	-0.656513	-0.480468	-0.561811	-0.485173	-0.29185	-0.411333	-0.336764	-0.358757	-0.301752	-0.180383	-0.265371	-0.177435	-0.669779	-0.534159	-0.481278	-0.390644	0.984779	0.99373	0.55991	0.383544	0.973755	0.292267	0.725433	0.540607	0.507078	2	NA	Homoscedastic & Non-parametric	6.76464e-17	0.495522	0.655455	0.173908	8.94026e-07	0.865001	0.249443
HORVU1Hr1G077820.10	-0.735438	-0.78191	-0.416448	-0.173082	-0.440191	-0.345435	-0.311935	-0.485248	-0.129895	-0.602268	-0.258172	-0.22896	-0.745562	-0.639672	-0.585522	-0.602474	-0.824728	-0.427831	-0.213585	-0.511107	-0.490629	-0.394711	-0.358583	-0.289079	-0.344917	-0.118426	-0.61046	-0.730461	-0.568398	-0.411411	1.09745	1.31078	0.854062	0.67066	1.33573	0.423175	0.894555	0.638124	0.481242	2	NA	Heteroscedastic & Non-parametric	3.21676e-15	0.804058	0.778197	0.88995	3.05446e-07	0.948966	0.618026
HORVU1Hr1G018140.5	-0.75247	-1.04267	-0.340717	-0.156841	-0.578681	-0.443584	-0.392485	-0.601536	-0.164617	-0.602654	-0.404892	-0.425534	-1.11466	-0.728192	-0.846032	-0.747472	-1.01285	-0.695225	-0.480772	-0.568377	-0.626415	-0.435616	-0.468957	-0.320699	-0.493652	-0.299903	-1.04613	-1.0179	-0.787863	-0.61566	1.19361	1.48164	0.881867	0.655905	1.13728	0.608221	1.0779	0.890495	0.609027	2	NA	Heteroscedastic & Non-parametric	6.68584e-13	0.547907	0.95543	0.625438	3.70662e-07	0.861501	0.594171
HORVU1Hr1G082820.2	-0.885302	-0.873199	-0.326628	0.137083	-0.655047	-0.493283	-0.33347	-0.334586	-0.491108	-0.968462	-0.211596	-0.519145	-0.760758	-1.07758	-0.629891	-0.971472	-0.880805	-0.841051	-0.528718	-0.637137	-0.541835	-0.642481	-0.608792	-0.384442	-0.663896	-0.276882	-1.02878	-0.914562	-0.713289	-0.497177	1.34347	1.60108	1.08727	0.721672	1.29857	0.471464	0.783548	0.706725	0.530322	2	NA	Heteroscedastic & Non-parametric	1.62876e-12	0.233734	0.285924	0.827924	1.0286e-05	0.581243	0.658738
HORVU4Hr1G070970.1	-0.967334	-0.996513	-0.48815	0.151895	-0.750549	-0.453349	-0.426009	-0.646657	-0.539683	-0.947823	-0.450508	-0.387104	-0.917376	-0.958676	-0.745331	-1.1153	-1.23937	-0.77396	-0.488638	-0.609974	-0.629241	-0.665816	-0.613778	-0.355976	-0.870547	-0.470364	-0.842418	-1.0446	-0.994032	-0.720762	1.44865	1.62737	1.01845	0.634965	1.16258	0.629007	1.15056	1.01436	0.732805	2	NA	Heteroscedastic & Non-parametric	5.41928e-12	0.190595	0.127218	0.477136	1.1782e-06	0.68787	0.445252
HORVU2Hr1G099870.2	-1.17567	-1.70791	-0.566485	-0.36218	-1.24845	-0.845879	-0.474321	-1.16369	-0.67347	-1.46835	-0.7141	-0.712217	-1.595	-1.19014	-1.58378	-1.45595	-1.02414	-0.846446	-0.834745	-0.950136	-0.843161	-1.18177	-1.03877	-0.762677	-0.904429	-0.335215	-1.20931	-1.37917	-0.843946	-0.544245	1.38383	1.55573	1.28954	0.918992	1.56577	0.956264	1.31511	1.28633	1.09077	2	NA	Heteroscedastic & Non-parametric	2.73021e-10	0.636749	0.190944	0.465395	2.44923e-07	0.506896	0.383519
HORVU5Hr1G010330.1	-0.827535	-1.34808	-0.408352	-0.15428	-0.732024	-0.466908	-0.308822	-0.663316	-0.568865	-1.6663	-0.596719	-0.308827	-1.04051	-1.34795	-1.05334	-1.28065	-1.49401	-0.800032	-0.574009	-0.818084	-0.817224	-1.03918	-0.794333	-0.732054	-0.698441	-0.649337	-0.987519	-0.793026	-1.19933	-0.874437	1.14973	1.50946	1.05793	0.952655	1.47698	0.507596	0.953516	0.908935	1.17621	2	NA	Homoscedastic & Non-parametric	3.02394e-11	0.163856	0.212496	0.552433	1.24617e-06	0.770649	0.434202
HORVU3Hr1G004250.2;HORVU3Hr1G004280.2	-1.09578	-0.813659	-0.213076	-0.382993	-0.588447	-0.282622	-0.486505	-0.422164	-0.396385	-0.806235	-0.133564	-0.158639	-0.325412	-0.672107	-0.432155	-0.47596	-0.68547	-0.428402	-0.53065	-0.146245	-0.315249	-0.977466	-0.243063	-0.0953619	-0.374971	-0.294172	-0.740891	-0.895207	-0.737782	-0.541862	0.759558	1.11688	0.725535	0.484471	0.870434	0.945963	1.14904	0.842442	0.715136	2	NA	Homoscedastic & Non-parametric	1.78093e-14	0.729773	0.0596969	0.636528	5.57263e-08	0.841598	0.791251
HORVU4Hr1G059270.2	-0.744659	-0.634373	-0.195507	0.110323	-0.252636	0.0355573	-0.238436	-0.205334	0.0331087	-0.748475	-0.31083	0.0189255	-0.349128	-0.495064	-0.38199	-0.983647	-0.685806	-0.520595	-0.452579	-0.305804	-0.385659	-0.191389	-0.379204	-0.153234	-0.615627	-0.194124	-0.781884	-0.855655	-0.396374	-0.504311	0.954579	0.82333	0.722468	0.622274	1.08874	0.967041	1.23819	0.413128	0.507762	2	NA	Heteroscedastic & Non-parametric	7.08034e-13	0.136985	0.298114	0.480712	1.96219e-05	0.836282	0.686679
HORVU3Hr1G004140.1	-1.96377	-1.42848	-0.179895	-0.6384	-1.15892	-0.847408	-0.877747	-0.875194	-0.748141	-2.30758	-0.688923	-0.958376	-1.31034	-1.67208	-1.18405	-2.0785	-1.06031	-1.0564	-1.35385	-0.833965	-0.965415	-0.892154	-0.611202	-0.299492	-1.23173	-0.405312	-1.91214	-2.17191	-0.815539	-1.18128	1.28281	1.43125	1.30358	1.08374	1.46992	1.28146	1.57873	1.46952	1.35938	2	NA	Homoscedastic & Non-parametric	1.25006e-07	0.826641	0.168906	0.68518	9.70227e-06	0.645979	0.939039
HORVU1Hr1G079280.2	-0.849638	-2.1996	0.0273079	0.798793	-0.404378	-0.029779	-0.211025	-0.22936	-0.783501	-0.956302	-0.230307	-0.461567	-1.77013	-1.14318	-1.79531	-0.775361	-0.838533	-0.922604	-0.822591	0.143899	-0.14074	-0.084125	-0.299486	0.0704214	-0.512847	-0.795675	-1.28154	-0.597858	-1.67121	-0.897127	0.905746	1.24156	1.07734	0.569544	1.10026	0.585478	0.986665	0.742526	-0.0270248	2	NA	Homoscedastic & Non-parametric	5.13803e-06	0.523921	0.325184	0.29441	0.0440665	0.637941	0.586005
HORVU1Hr1G056570.2	-0.864263	-1.62667	-0.182538	0.312448	-0.603922	-0.180397	-0.104964	-0.0385907	-0.300188	-0.818676	-0.0654973	-0.301915	-1.24926	-0.74206	-1.25446	-1.13977	-0.671276	-0.859431	-0.657677	-0.182889	-0.383337	-0.958915	-0.722366	-0.239284	-0.844685	-0.260107	-0.645376	-0.612114	-0.549277	-0.495996	0.989823	1.10719	0.884421	0.763709	0.914936	0.660738	0.490391	0.303319	0.245334	2	NA	Homoscedastic & Non-parametric	1.38185e-09	0.588141	0.535579	0.483491	0.00604258	0.779096	0.965024
HORVU3Hr1G059030.1	-1.06207	-1.73626	0.00425305	0.593186	-0.508913	0.0399359	-0.0726546	-0.117768	-0.143415	-0.41569	0.0762904	-0.156655	-0.990775	-0.609195	-1.17462	-0.943135	-1.05338	-1.46618	-1.30862	-0.0786227	-0.407853	-0.712701	-0.592443	-0.306969	-0.706471	-0.610196	-1.64986	-1.13886	-1.14061	-0.95065	0.823636	0.968066	1.07845	0.770937	0.498317	0.671791	0.477974	0.200876	-0.180025	2	NA	Homoscedastic & Non-parametric	9.39636e-08	0.0848767	0.351618	0.363245	0.155051	0.982566	0.944385
HORVU1Hr1G079290.4	-1.24572	-1.85775	-0.20779	0.708777	-0.849296	-0.0749019	-0.102002	-0.0559718	-0.266403	-1.10028	-0.185798	-0.339574	-0.925498	-1.07088	-1.46264	-1.4047	-1.3326	-1.70141	-1.25311	-0.260347	-0.474596	-0.846761	-0.79183	-0.257684	-0.901948	-0.48538	-1.21647	-0.826793	-1.25738	-1.20258	0.901635	1.18705	0.94493	0.570584	0.951097	1.12922	1.17964	0.908073	0.767453	2	X60	Homoscedastic & Non-parametric	6.09964e-07	0.152304	0.228865	0.315694	0.00296147	0.84502	0.861448
HORVU4Hr1G074750.1	-1.17281	-1.55264	-0.170051	0.828581	-0.789661	-0.174987	-0.0918586	-0.167614	-0.787791	-1.12046	0.173591	-0.440741	-1.26837	-1.40548	-1.19554	-1.58422	-1.61183	-1.64842	-1.37026	-0.672121	-0.756727	-0.850419	-0.853658	-0.497463	-1.07722	-0.767873	-1.96668	-1.72643	-1.3665	-0.989632	1.11713	1.49696	0.898884	0.441187	1.14876	0.869775	1.50709	0.94169	1.08553	2	X60	Homoscedastic & Non-parametric	2.28517e-06	0.0467605	0.171183	0.635519	0.00266821	0.801944	0.916617
HORVU6Hr1G037500.21	-0.310827	-0.394703	-0.17421	-0.271462	-0.254185	-0.148952	-0.0532683	-0.0348738	-0.110892	-0.297096	-0.196236	-0.0191574	-0.14091	-0.283844	-0.215061	-0.161437	-0.140867	-0.238577	-0.0801978	-0.0674635	-0.0450375	-1.19682	-0.412583	-0.36074	-0.208229	-0.0457894	-0.372743	-0.0642913	-0.0974111	-0.0779369	0.409901	0.485579	0.252375	0.888588	1.2377	0.43885	0.717684	0.608239	0.362188	2	NA	Homoscedastic & Non-parametric	1.2604e-14	0.786054	0.880421	0.880377	0.000122762	0.897926	0.72912
HORVU1Hr1G067370.3	-0.69367	-1.00913	-0.316161	-0.297563	-0.471172	-0.165081	-0.42046	-0.178112	-0.422125	-0.98265	-0.545571	-0.207703	-0.485552	-0.464837	-0.468045	-0.105951	-0.320238	-0.322613	-0.192349	0.0098182	-0.122459	-0.731819	-0.351003	0.201985	-0.0325633	0.157972	-0.691798	-0.620393	-0.142317	-0.237617	1.03678	0.620831	0.573992	0.915904	1.34425	0.270428	0.617097	0.196114	0.202474	2	NA	Homoscedastic & Non-parametric	3.52149e-13	0.155943	0.315629	0.39817	0.000809285	0.937912	0.902615
HORVU1Hr1G078050.1;HORVU1Hr1G078070.1	-1.81253	-1.52928	-0.610538	-0.986708	-1.23891	-0.730986	-0.8195	-1.14722	-0.837394	-1.72788	-0.769777	-0.79179	-0.53963	-1.07527	-1.25625	-0.896158	-1.74095	-0.975628	-1.20281	-0.0771092	0.0356086	-3.21923	-0.406675	-0.00276193	-0.45951	-0.532349	-1.261	-1.17345	-1.14937	-0.475668	1.82443	1.79423	0.978205	1.08495	1.42899	0.298022	1.03072	0.835882	-0.369262	2	NA	Heteroscedastic & Non-parametric	2.25417e-07	0.362025	0.111134	0.519811	0.00100532	0.69733	0.667217
HORVU4Hr1G057890.5	-0.225791	0.283823	-0.0404166	0.430033	-0.0990978	-0.0997674	-0.259532	-0.38364	-0.0935719	-0.273913	-0.0723587	-0.0582106	-0.382509	-0.00730131	-0.191955	-0.212292	-0.200809	0.297321	-0.374215	0.0246064	-0.341858	-0.212795	-0.666714	-0.398679	-0.425054	-0.438793	-1.08592	-1.08563	-0.543997	-0.1864	0.374887	-0.157565	-0.265662	0.0383319	0.546939	0.460425	1.13507	0.291929	0.293666	2	X709	Homoscedastic & Non-parametric	4.04963e-11	0.0381808	0.289454	0.746381	0.0135829	0.395222	0.30115
HORVU5Hr1G050120.1;HORVU5Hr1G050140.1	-0.152703	-0.839132	0.268056	0.681047	0.161802	0.644318	0.119078	0.252883	0.258619	-0.442728	-0.0570788	0.682048	0.128752	0.223482	-0.28282	-0.0010074	-0.299231	-1.24851	-1.42048	-0.231406	-0.331176	-0.529659	-0.405734	-0.381418	-0.112073	-0.693822	-1.71645	-0.701442	-1.80811	-1.36402	0.116751	-0.385191	0.181515	0.117341	0.344934	0.911604	1.00214	0.450612	-0.0742915	2	NA	Homoscedastic & Parametric	8.43152e-12	0.000405658	0.0964426	0.0690947	0.263826	0.101071	0.318746
HORVU3Hr1G112860.1	-0.33494	-0.969037	0.0653637	0.786602	0.116352	0.175691	0.171382	0.642558	-0.139334	-0.24491	0.275013	0.0728052	-0.555579	-0.664692	-0.538452	-0.230476	-0.812604	-0.48822	0.0119549	0.224201	-0.0839316	-0.282552	-0.25932	-0.423473	-0.464517	-1.28936	-0.390366	-0.114146	-1.04834	-0.934426	-0.151741	-0.664894	-0.650115	-0.180719	0.259879	0.551334	1.24278	0.287576	0.386374	2	NA	Homoscedastic & Non-parametric	7.57439e-08	0.184659	0.958036	0.639516	0.0534922	0.719928	0.668597
HORVU7Hr1G082040.3	-0.605164	-0.599138	-0.0556197	0.908576	-0.157466	0.158428	0.056297	0.42066	-0.275242	-0.300717	0.544859	0.047287	-0.270328	-0.666162	-0.260659	-0.549768	-0.452328	-0.883005	-0.545777	-0.0784039	-0.107686	-0.445447	-0.405969	-0.394504	-0.550429	-0.18576	-1.144	-0.595396	-0.674385	-0.367094	0.000702034	-0.00726077	-0.35458	-0.273715	0.552926	0.51814	1.48889	0.526735	0.412481	2	NA	Homoscedastic & Non-parametric	1.65103e-08	0.0346323	0.393937	0.821645	0.0204198	0.444317	0.696432
HORVU4Hr1G051320.3	-0.360264	-0.75806	0.0800008	0.79998	0.142347	0.20168	0.354164	0.431044	0.0278564	-0.0724179	0.119312	0.199048	-0.143212	-0.17136	-0.427272	-0.556701	-0.631391	-1.02155	-0.673092	-0.0570779	-0.236557	-0.433567	-0.465863	-0.286488	-0.51701	-0.596728	-0.827436	-0.316305	-0.74368	-0.519879	0.0763023	0.307333	-0.331421	-0.131731	0.329223	0.436442	0.656101	0.208172	0.300593	2	NA	Homoscedastic & Parametric	4.77152e-13	0.0044835	0.437994	0.203269	0.221916	0.661886	0.51399
HORVU5Hr1G045750.1	-0.606202	-1.2496	0.0480212	1.28793	0.0175571	0.433793	0.372424	0.656814	0.00464002	-0.224201	0.231576	0.206362	-0.472465	-0.446672	-0.589873	-0.739008	-0.558381	-1.27386	-0.845832	-0.0493649	-0.14472	-0.533658	-0.470581	-0.521785	-0.719324	-0.768916	-1.36411	-0.427408	-1.13416	-0.432775	0.181551	-0.374495	-0.263816	0.0987065	0.376595	1.05986	1.44418	0.648907	0.16502	2	NA	Homoscedastic & Non-parametric	6.51902e-07	0.0110312	0.448929	0.354875	0.0873161	0.550182	0.463809
HORVU5Hr1G092150.1;HORVU5Hr1G092100.1	-1.50153	-0.916508	0.376309	2.04446	-0.0051752	0.667482	0.609707	0.813838	-0.891087	-0.305324	0.675144	0.0890196	-0.608056	-1.19536	-0.557626	-0.838114	-0.998418	-2.77219	-2.53356	-0.036896	-0.131046	-0.943093	-0.81797	-0.400536	-1.03187	-1.89445	-3.09536	-1.16213	-2.64978	-1.48134	-0.239887	-0.594536	-0.576113	-0.433397	-0.069576	0.962875	1.66581	0.61134	0.15713	2	NA	Homoscedastic & Non-parametric	0.000929104	0.0264335	0.203023	0.532295	0.550158	0.747813	0.88378
HORVU3Hr1G006530.1;HORVU3Hr1G007380.1	-0.749929	-0.897647	0.0424788	1.53078	-0.114791	0.812054	0.288586	0.28269	-0.345793	-0.819192	0.204562	-0.389682	-0.855212	-0.639517	-1.12319	-0.832701	-0.973127	-1.14877	-1.03179	-0.0262586	0.136973	-0.88443	-0.439289	-0.956098	-1.32305	-1.41562	-1.60985	-0.85936	-1.77182	-0.670931	-0.50872	-1.07003	-0.572863	-0.360823	-0.212296	1.59513	1.16375	1.11983	0.757818	2	NA	Homoscedastic & Non-parametric	3.10624e-05	0.0155761	0.232691	0.64184	0.0492997	0.554477	0.270279
HORVU6Hr1G083960.2	0.124242	-1.13709	-0.135777	0.498605	-0.297816	-0.0727714	-0.391616	0.328956	-0.43924	-0.602453	-0.0997034	-0.0777651	-0.605984	-0.690648	-0.785265	-0.794252	-0.777024	-1.28582	-0.78991	-0.710471	-0.622104	-1.50411	-1.31587	-1.4588	-0.897327	-0.836128	-1.03768	-0.826237	-1.16185	-1.06363	-0.10125	-0.0513067	-0.268186	-0.345337	0.2646	1.14268	1.54704	0.917797	1.02054	2	NA	Homoscedastic & Non-parametric	2.54528e-10	0.000780227	0.990401	0.185343	2.20129e-05	0.678258	0.391385
HORVU5Hr1G057560.1	0.128447	-0.176398	0.104598	0.0914341	0.0933611	0.0139615	0.191519	0.00544517	0.176382	-0.209301	-0.0164357	0.138754	0.182277	0.0878728	0.136465	0.255195	-0.0599503	0.306624	0.169686	0.432478	0.0867398	-0.681223	0.95321	0.793306	0.433866	-0.0420025	0.0826599	-0.0806813	-0.485865	-0.482676	0.367158	0.531461	0.644533	1.62903	1.43246	0.162303	0.688898	0.0900635	0.0607095	3	NA	Homoscedastic & Non-parametric	6.00373e-10	0.418796	0.744007	0.71321	0.536032	0.335374	0.846889
HORVU3Hr1G016820.3;HORVU3Hr1G016800.1	-0.507566	-0.0948496	-0.356861	-0.287403	-0.570795	-0.419463	-0.0616529	-0.188967	0.00639782	-0.0972475	0.0288915	0.0347395	0.128345	-0.148172	0.196945	-0.118989	-0.168257	0.153413	-0.101584	-0.0911537	0.0276077	-0.0310032	0.41792	0.0829036	0.352676	0.227657	-0.14439	-0.107984	0.137876	-0.00439284	0.270729	0.440257	0.271961	0.263858	0.844196	0.0927965	0.422728	0.42696	0.156804	3	NA	Homoscedastic & Non-parametric	1.05826e-15	0.17026	0.314975	0.675644	0.010197	0.81149	0.870716
HORVU5Hr1G115780.2	-0.102603	-0.251989	-0.193347	-0.341123	0.0408053	-0.0361341	-0.0876309	-0.440467	-0.240191	-0.551051	-0.253721	0.139111	-0.567062	-0.478296	-0.241811	-0.0898469	0.0659739	-0.130695	0.00615552	-0.143533	-0.226161	-0.473879	0.0176033	-0.179431	-0.295555	0.230141	-0.737753	-0.614036	0.121221	0.135993	0.817221	0.137353	0.23406	0.332666	0.436104	-0.192031	0.349135	-0.0141473	0.735119	3	NA	Homoscedastic & Non-parametric	7.57885e-13	0.798171	0.894583	0.592779	0.00808119	0.831439	0.740046
HORVU1Hr1G017050.3	-0.174874	-0.444419	-0.333269	-0.221177	0.0300371	-0.155224	-0.788074	-0.0906355	-0.143454	-0.42264	-0.484422	-0.373411	-0.739311	-0.0148436	-0.0440445	0.548541	0.1814	-0.102529	-0.00682413	-0.108523	-0.154759	0.230813	-0.03123	-0.203008	-0.505526	0.0237855	-0.607503	-0.343865	-0.0345903	0.130751	0.533029	0.252923	-0.061123	0.569046	0.763907	0.197475	0.526852	0.197839	-0.0449323	3	NA	Homoscedastic & Non-parametric	4.94224e-14	0.787689	0.305908	0.790897	0.00266279	0.312825	0.230328
HORVU1Hr1G021180.1	-0.351388	-0.326167	-0.363991	-0.355442	-0.148578	-0.351227	-0.408424	-0.326972	-0.0525965	-0.3236	-0.332851	-0.222054	-0.305442	0.00509475	0.0998566	0.254037	0.065802	0.491682	0.150235	-0.0274309	-0.165286	0.0273124	-0.159751	-0.139605	-0.26379	-0.190014	-0.362552	-0.334337	-0.132213	-0.0487023	0.516395	0.160992	0.041585	0.359061	0.735339	0.0112885	0.489271	-0.0342041	0.154495	3	NA	Homoscedastic & Non-parametric	1.70959e-15	0.662984	0.965662	0.945376	0.00894148	0.465599	0.216507
HORVU1Hr1G021150.2	-0.287201	-0.536729	-0.273913	-0.502131	-0.35268	-0.62526	-0.760832	-0.618898	-0.0692372	-0.491576	-0.510988	-0.546385	-0.529114	-0.0491329	-0.0764211	0.230341	0.157949	-0.0765722	-0.11594	-0.249216	-0.377893	-0.322985	-0.748734	-0.0477794	-0.314483	0.0597925	-0.527947	-0.637637	-0.203313	-0.227807	0.915289	0.51581	0.0905949	0.754063	1.27111	-0.0906226	0.418789	0.0725543	-0.151859	3	NA	Homoscedastic & Non-parametric	1.26422e-12	0.555594	0.933247	0.522165	0.0254197	0.52298	0.714051
HORVU5Hr1G073690.2;HORVU5Hr1G073650.1	-0.261909	-0.7051	-0.270865	-0.14844	0.0418378	-0.11734	-0.430328	0.498391	0.226446	-0.112717	-0.314567	-0.109797	0.0998929	-0.00667959	-0.258345	-0.123246	0.351973	-0.536042	-0.224269	-0.111121	-0.30074	0.0736408	-0.1867	0.187035	-0.453533	0.41114	0.279707	0.323965	0.0432363	0.0312403	0.697199	-0.215946	0.373616	0.503219	0.527256	0.00571654	0.106845	0.0238958	-0.740869	3	X1075	Homoscedastic & Parametric	1.62838e-12	0.599355	0.283365	0.182276	0.868296	0.865066	0.974998
HORVU1Hr1G094920.5	-0.374588	-0.201884	-0.358368	-0.420683	-0.137543	-0.546127	-0.189694	0.0325183	0.146912	-0.105493	-0.139029	-0.35657	0.319094	0.161651	-0.0261536	-0.218782	0.154216	0.452316	-0.0848765	0.212262	0.147243	-0.0509181	-0.22553	-0.208617	0.0628495	0.229365	0.387979	0.000705644	0.246456	0.0898742	0.934577	0.821962	0.400407	0.0167886	0.429151	-0.102146	0.143816	-0.152879	-0.164522	3	NA	Homoscedastic & Non-parametric	6.13584e-14	0.126655	0.900178	0.482105	0.842124	0.549974	0.75792
HORVU1Hr1G073280.1	-0.103468	-0.0910468	-0.0511148	-0.183558	0.103792	-0.061695	0.247758	0.0559746	0.306165	0.197277	0.124925	0.194764	0.166569	0.139419	0.116899	-0.251001	-0.288972	-0.0541469	0.302564	-0.150317	-0.118258	0.184545	-0.265755	0.105769	0.129812	0.320088	-0.154562	0.0396105	0.0371189	-0.377106	-0.195341	1.47966	0.591834	0.503175	1.34812	-0.382162	0.131946	-0.237696	-0.413059	3	NA	Heteroscedastic & Non-parametric	5.08064e-12	0.746447	0.761322	0.948054	0.197481	0.899554	0.719313
HORVU6Hr1G036810.1	-0.177949	-0.155414	-0.203942	-0.369267	-0.368089	-0.103767	-0.125425	-0.0896911	-0.0973467	-0.141658	-0.136204	0.122135	0.00410351	-0.155813	-0.146954	-0.0119223	-0.0435589	-0.0295469	0.0893404	0.00560194	0.120666	-0.0759522	-0.166382	-0.0817115	-0.151571	0.0855276	-0.104933	-0.190942	-0.0991078	0.0671962	0.158808	0.625777	0.236051	0.0592456	0.474818	-0.234643	0.142059	-0.354433	-0.329706	3	NA	Homoscedastic & Non-parametric	4.07831e-20	0.794031	0.528151	0.812035	0.500175	0.454561	0.359295
HORVU3Hr1G109780.2	-0.207039	-0.352778	0.189681	-0.399631	-0.352398	-0.211971	-0.328452	-0.0326232	-0.0262399	-0.542732	-0.239558	-0.186103	0.0325161	0.333277	0.146859	0.355684	0.187435	0.0684049	0.270443	0.130673	-0.0806324	0.181015	-0.0729189	0.181457	0.27211	0.281946	0.228561	-0.0302321	0.278587	0.0306739	0.202764	0.15067	-0.0249973	0.189394	0.50563	-0.35415	-0.120418	-0.427595	-0.307402	3	NA	Homoscedastic & Parametric	1.29128e-17	0.0724298	0.0711388	0.115126	0.029108	0.241718	0.979859
HORVU1Hr1G086690.1;HORVU1Hr1G086460.1;HORVU1Hr1G086610.1;HORVU1Hr1G086480.1;HORVU3Hr1G061790.1	-0.299624	-0.306178	0.023156	-0.320982	-0.149943	-0.338881	-0.442186	-0.0639563	-0.253336	-0.541562	-0.505139	-0.0954835	-0.15375	-0.033466	0.145339	0.383709	0.112531	0.30372	0.296458	0.0217194	-0.0984875	0.147634	0.0504788	0.133824	0.0507479	0.113895	0.0893811	-0.222431	0.176188	0.0163778	-0.0604768	0.478983	-0.343962	0.160596	0.396872	-0.705832	-0.165757	-0.473243	0.0704124	3	NA	Homoscedastic & Parametric	1.22827e-14	0.147468	0.374899	0.322617	0.301592	0.446887	0.396269
HORVU1Hr1G083730.8	0.15082	-0.730355	-0.143956	-0.135647	-0.0183755	-0.316998	0.0395864	-0.0464912	-0.159398	-0.0714825	-0.138783	0.155556	-0.0811882	-0.21179	-0.680363	-0.15795	0.0230005	-0.187881	0.231306	-0.0371965	-0.442518	0.34351	-0.207783	-0.100642	0.414593	0.673155	-0.0524544	-0.09454	0.545402	-0.0484737	-0.0721881	0.544014	0.0187951	0.385698	0.835272	-0.284231	0.308921	0.236412	-0.636664	3	NA	Homoscedastic & Non-parametric	8.09282e-12	0.194089	0.787871	0.195463	0.868097	0.869459	0.97602
HORVU6Hr1G089570.2	-0.265303	-0.651066	-0.0338144	-0.339052	-0.246668	-0.202339	-0.0486797	0.0135784	0.137372	-0.0232212	-0.302964	0.0580461	-0.00780233	-0.192691	-0.361628	-0.018523	0.0512483	-0.171615	0.162868	-0.0756151	-0.18426	0.27217	-0.0810953	0.207157	-0.0833678	0.29313	0.237805	0.136576	0.258383	-0.276008	0.239693	0.76898	-0.193722	-0.0900251	0.34784	0.0861124	0.111433	0.105871	-0.23058	3	NA	Homoscedastic & Non-parametric	8.15278e-16	0.127324	0.840023	0.14387	0.40383	0.98875	0.939202
HORVU3Hr1G085830.1	-0.7379	-0.402864	-0.60887	-0.300568	-0.187979	-0.194243	-0.260277	-0.0508905	0.0157033	-0.0851897	-0.296381	-0.00205881	-0.194822	-0.131674	-0.158324	0.0626172	0.0200844	-0.0356008	0.169681	-0.0338384	0.0987868	0.291204	0.0807795	0.0829702	0.121028	0.346095	-0.0778733	0.11031	0.0691772	0.0301296	0.406251	0.204092	0.0522579	0.152995	0.345842	0.192925	0.872664	-0.173804	-0.634769	3	NA	Heteroscedastic & Non-parametric	9.30607e-14	0.10995	0.768681	0.871479	0.0246784	0.763977	0.790729
HORVU7Hr1G018670.3	-0.539445	-0.562517	0.240136	0.00387729	0.0319096	0.212605	-0.316754	0.025816	0.236683	-0.38286	-0.355947	-0.0852054	-0.232445	-0.222637	0.00415753	0.107147	-0.0809214	-0.458663	0.0838083	-0.209359	-0.208795	0.395801	0.113452	0.0245575	0.111417	0.433773	-0.239286	-0.115608	0.216596	0.1232	0.306642	0.499595	0.139526	0.58433	0.797195	-0.116992	0.476895	-0.041147	-0.210695	3	NA	Homoscedastic & Parametric	1.69491e-12	0.822886	0.792415	0.502333	0.587405	0.357285	0.760466
HORVU5Hr1G003820.2	-0.215301	-0.560414	-0.185674	-0.43128	-0.216283	-0.200425	-0.0960763	-0.286376	-0.0146266	-0.268838	-0.296054	-0.117066	-0.392446	-0.0935775	-0.205069	0.0258286	0.0677421	-0.00533348	0.259871	-0.157934	-0.106139	0.192724	0.0928233	0.0419171	-0.0118013	0.248714	-0.145224	-0.112008	0.135692	0.00484966	-0.168588	0.0841284	0.0540361	0.322701	0.523737	-0.126911	0.428082	-0.3372	-0.449575	3	NA	Homoscedastic & Parametric	1.62356e-14	0.13714	0.788927	0.865423	0.307447	0.657026	0.583894
HORVU4Hr1G066900.1	-0.306215	-0.471585	-0.349704	-0.306383	-0.394788	-0.212482	-0.432651	-0.449002	-0.15138	-0.383442	-0.401423	-0.180892	-0.62998	-0.239292	-0.29377	0.168812	-0.118015	-0.204383	0.327599	0.0192739	-0.101183	0.131381	-0.0403803	0.026122	-0.0230848	-0.0707268	-0.0576613	-0.0156173	-0.213061	-0.305776	-0.0118552	0.566827	0.1826	0.483014	0.746283	0.114355	0.61602	-0.012802	0.0519636	3	X1297	Homoscedastic & Non-parametric	9.64909e-17	0.0306922	0.999981	0.83694	0.000285079	0.726977	0.876464
HORVU7Hr1G057640.1	-0.388465	-0.524381	-0.0158351	-0.266487	-0.138135	-0.20192	-0.065729	-0.187799	-0.170761	-0.0569351	-0.4999	0.237926	-0.0049284	-0.101394	-0.20616	0.211033	0.127007	-0.217183	0.377472	0.366693	0.271989	-0.00278597	-0.0224397	-0.0342874	0.129372	0.490112	0.100627	0.168982	0.293954	0.222198	-0.00730909	0.639959	0.0692919	-0.352039	0.271641	-0.221194	0.0912893	-0.653783	-0.507834	3	NA	Homoscedastic & Parametric	2.72414e-14	0.17599	0.323793	0.123388	0.137944	0.392062	0.358611
HORVU3Hr1G095450.1	-0.263761	-0.167868	-0.308533	-0.534899	-0.155075	-0.309417	0.0605155	0.0501125	0.0106765	-0.185462	-0.154541	-0.122842	-0.0421187	-0.172992	0.131494	-0.00835205	-0.121282	-0.070784	0.319709	0.0631946	0.125488	0.244111	0.0841338	-0.00394629	0.160733	0.451249	-0.029189	0.00670274	0.146667	-0.0808848	-0.0352587	0.585158	0.233814	-0.013566	0.428509	-0.456448	-0.261809	-0.314079	-0.445791	3	NA	Homoscedastic & Parametric	3.62807e-15	0.0286327	0.378123	0.286482	0.383159	0.796444	0.499111
HORVU2Hr1G035750.1;HORVU0Hr1G003040.1;HORVU2Hr1G035760.5	-0.174631	-0.21097	-0.228245	-0.309535	-0.40032	-0.285082	-0.246792	-0.0434531	0.0226257	-0.0541677	-0.218106	-0.275213	-0.0937437	-0.253467	-0.0565836	-0.00216241	-0.0180569	-0.138617	0.288585	0.11002	-0.0889184	0.139132	0.0147979	-0.0391435	0.0717497	0.334282	-0.158488	0.112116	0.261572	0.071827	-0.102594	0.615227	0.0560583	0.0850262	0.394709	-0.360351	0.171735	-0.533691	-0.540394	3	NA	Homoscedastic & Parametric	8.69204e-15	0.0400962	0.455232	0.845491	0.734934	0.873067	0.806413
HORVU2Hr1G043970.1	-0.592569	-0.264775	-0.379206	-0.212871	-0.291806	-0.156733	-0.405959	-0.11721	0.267839	-0.130535	0.0391148	-0.155709	-0.111544	0.094622	-0.160294	0.52262	0.0721498	0.0097743	0.264048	0.0141829	-0.198726	0.39515	0.297178	0.266999	0.115705	0.336974	0.0132228	-0.262568	0.236771	0.0791392	0.0469012	0.644026	-0.163797	0.37783	0.411693	-0.531451	-0.186551	-0.436982	-0.727417	3	NA	Homoscedastic & Parametric	5.1265e-13	0.0854229	0.995249	0.831229	0.134856	0.588283	0.99602
HORVU1Hr1G022570.1	-0.459218	-0.45737	-0.466879	-0.258376	-0.162563	-0.256795	-0.591528	-0.284419	0.0498294	-0.0865393	-0.1262	-0.294201	-0.341746	-0.111194	-0.267741	0.0484297	-0.061755	0.0934158	0.214905	0.0536868	-0.0815471	0.265935	0.32955	0.297106	0.0126271	0.214071	0.0244147	-0.081701	0.0660353	0.0519736	0.354789	0.794283	-0.0025699	0.111556	0.246878	-0.438556	-0.000365681	-0.600711	-0.473393	3	NA	Homoscedastic & Non-parametric	1.85201e-16	0.0059394	0.391781	0.752245	0.612412	0.470115	0.682572
HORVU1Hr1G063300.1	-0.293274	-0.326793	-0.292814	-0.195127	0.0192201	-0.0370134	0.172296	0.0315927	-0.316525	-0.603384	-0.661232	0.110455	-0.0321667	-0.115386	-0.0588294	0.122331	-0.00165146	-0.0709308	0.148604	-0.0624798	0.0890927	0.132228	0.0344883	-0.0431301	0.113916	0.278108	0.12078	-0.0779338	0.109869	0.0576993	0.553613	0.53453	-0.106312	0.174863	0.426688	-0.142374	0.209857	0.130682	-0.859074	3	NA	Homoscedastic & Parametric	3.41556e-14	0.322397	0.482813	0.724247	0.948815	0.467141	0.789554
HORVU6Hr1G028690.3	-0.22454	-0.215066	-0.239306	-0.16903	0.0671941	-0.0622363	-0.0469206	0.0267509	-0.426742	-0.512855	-0.794542	-0.0211281	-0.0221495	-0.498313	0.0184695	0.267669	0.0578045	-0.157456	0.105826	0.0740189	0.116062	0.296254	0.0863423	0.0865577	0.356504	0.366582	0.240723	-0.124722	0.0340218	-0.117092	0.295717	0.569041	-0.242368	0.26333	0.36691	-0.308762	0.143623	-0.199137	-0.408456	3	NA	Homoscedastic & Parametric	6.16913e-14	0.0208159	0.922534	0.938182	0.990977	0.855229	0.454004
HORVU6Hr1G083840.4	-0.337873	-0.0508219	-0.258649	-0.291221	-0.310657	-0.228295	-0.0631553	-0.15668	-0.0761668	-0.218496	-0.403124	0.204586	0.149028	-0.140927	-0.100362	-0.0190346	-0.0160241	0.164887	0.154059	0.0220703	-0.0297645	0.200425	0.0442343	0.10564	0.273557	0.201341	0.152761	-0.115225	0.00976559	-0.234302	0.433955	0.191927	0.209102	-0.0325875	0.373786	-0.168266	0.135804	-0.165166	-0.55876	3	NA	Homoscedastic & Parametric	4.73253e-18	0.122422	0.177943	0.351367	0.358377	0.57967	0.952565
HORVU6Hr1G069560.1	-0.41791	-0.0912477	-0.203148	-0.054084	-0.196914	-0.226317	-0.207618	0.0154268	-0.0392577	-0.321083	-0.355331	-0.119274	0.0338254	-0.244686	-0.185108	0.0120212	-0.0470753	-0.103179	0.144287	0.074162	0.0800238	0.10309	0.150628	-0.0368699	0.094723	0.140024	0.0929258	-0.0100241	0.059742	-0.0248867	0.434833	0.312788	0.148891	-0.121517	0.20265	-0.305227	0.0577049	-0.540314	-0.590081	3	NA	Homoscedastic & Parametric	1.70013e-19	0.0785906	0.508135	0.358127	0.0793777	0.733333	0.539876
HORVU3Hr1G102520.2	-0.300047	-0.387776	-0.273107	-0.041369	-0.173641	-0.263518	-0.0131773	-0.137582	-0.0270915	-0.307155	-0.301318	0.140907	-0.105935	-0.217325	-0.0981299	-0.0355076	-0.0441796	0.137886	0.271735	0.097593	0.172358	0.154866	-0.201103	0.0085136	0.438623	0.20839	0.0373185	-0.0462323	-0.0250704	-0.0877271	0.484256	0.0392216	0.361079	0.286596	0.801812	-0.308819	0.132281	-0.2774	-0.348592	3	NA	Homoscedastic & Non-parametric	3.75505e-17	0.0889974	0.447549	0.353543	0.46719	0.835293	0.66283
HORVU7Hr1G021800.1	-0.406805	-0.749137	-0.302021	-0.349271	-0.427377	-0.146121	-0.293586	-0.279193	-0.221028	-0.498096	-0.473982	-0.0372412	0.0223641	-0.0259414	-0.159542	0.0919972	0.175405	0.409892	0.189572	0.0863402	0.0854995	-0.0145012	-0.0986027	0.236466	0.342507	-0.0905285	0.21419	-0.42711	0.0331218	0.246024	0.0709596	0.193704	0.432172	0.354409	0.677105	-0.238503	-0.0381404	-0.503858	-0.855127	3	NA	Homoscedastic & Parametric	2.37234e-15	0.0171777	0.137067	0.162015	0.138536	0.822678	0.350577
HORVU2Hr1G084680.6	-0.159979	-0.296004	-0.320189	-0.418794	-0.292107	-0.0950956	-0.150347	0.186972	-0.0971977	-0.371567	-0.283101	0.0316568	0.124533	-0.0122449	0.152842	0.208509	0.503474	0.0637366	0.305693	0.071136	0.138359	0.230835	0.169402	-0.0266574	0.379888	0.766701	0.0520718	-0.0494369	0.336313	0.151965	0.168304	0.319114	0.177519	0.183015	0.552723	-0.0721701	0.236611	-0.5247	-0.686449	3	NA	Homoscedastic & Parametric	3.42671e-13	0.0835649	0.863511	0.902664	0.556557	0.266733	0.946606
HORVU2Hr1G029350.2	-0.373747	-0.691007	-0.184725	-0.357109	-0.305877	-0.151903	-0.131504	-0.00152845	-0.0378762	-0.370146	-0.466082	0.299077	0.231005	-0.0179861	-0.271778	0.088172	0.0969596	-0.251272	0.065007	-0.041604	-0.000528599	0.169055	-0.096412	0.320999	0.487667	0.387073	0.251887	0.158326	0.173991	0.0177941	0.246742	0.0790622	-0.114257	0.110908	0.435586	-0.272557	0.0807274	-0.342209	-0.641949	3	NA	Homoscedastic & Parametric	1.47195e-16	0.0546808	0.113961	0.0227935	0.0638345	0.467594	0.948959
HORVU1Hr1G058810.5	-0.234245	-0.658923	-0.0924048	-0.34517	-0.273282	-0.110798	-0.175161	-0.0233938	-0.178873	-0.41479	-0.385474	0.088254	0.103385	-0.065024	-0.277289	0.00974799	0.0559276	-0.219464	0.193782	-0.0171741	-0.0956666	-0.0122182	0.0465415	0.265483	0.152021	0.270414	0.344193	0.138267	0.161052	0.0142936	0.232714	0.0965558	-0.144072	0.140906	0.374492	-0.0637077	0.203061	-0.227209	-0.420593	3	NA	Homoscedastic & Parametric	3.42839e-18	0.0258274	0.169065	0.0434598	0.64799	0.735508	0.887392
HORVU3Hr1G093080.1	-0.343958	-0.830739	-0.185698	-0.67583	-0.339748	-0.258572	-0.140061	-0.00566392	-0.143438	-0.284737	-0.380518	0.211512	0.152231	-0.126753	-0.172258	0.0312299	0.0998149	-0.151215	0.278217	0.10358	0.205455	0.07294	0.117277	0.317207	0.572735	0.331774	0.190289	0.115348	0.141987	-0.120288	-0.0237994	-0.159518	0.0324578	0.0865788	0.429172	-0.358818	0.0829527	-0.225251	-0.764022	3	NA	Homoscedastic & Parametric	1.48292e-14	0.00917239	0.432253	0.146894	0.268026	0.802231	0.940481
HORVU3Hr1G072860.2	-0.365723	-0.52092	-0.120424	-0.341702	-0.468597	-0.126346	-0.0551868	-0.0703026	-0.37796	-0.363228	-0.521329	0.0872233	0.134609	-0.131981	-0.101395	-0.0145261	0.0683028	-0.0764949	0.406223	-0.00755292	0.0649984	0.163307	0.0822701	0.19554	0.163937	0.39729	0.147142	0.191349	0.349523	0.148699	0.10654	0.195714	-0.0307204	0.181039	0.378295	-0.137824	0.0975466	-0.220429	-0.730849	3	NA	Homoscedastic & Parametric	5.10173e-17	0.0422474	0.0627799	0.164992	0.271484	0.19585	0.46739
HORVU0Hr1G013290.1;HORVU5Hr1G076560.1	-0.419167	-0.464701	-0.254457	-0.40204	-0.303167	-0.133432	-0.150651	-0.164563	-0.309623	-0.299641	-0.557869	-0.0126216	0.241103	-0.170205	-0.13767	0.00547824	-0.0254742	-0.408332	0.158718	-0.0680729	0.0562888	0.142221	-0.138561	0.000967766	0.183015	0.206626	0.140161	0.162973	0.102803	-0.104226	-0.0901408	-0.0985343	0.119649	0.204881	0.439224	-0.137301	0.154398	-0.263792	-0.612468	3	NA	Homoscedastic & Parametric	1.38691e-16	0.14755	0.161948	0.204172	0.538216	0.246288	0.980668
HORVU6Hr1G056490.2	-0.463831	-0.183748	-0.408122	-0.425873	-0.0762523	-0.193242	-0.162135	-0.0866821	-0.141062	-0.25151	-0.233118	-0.0836311	-0.0877882	-0.386216	0.0478229	-0.0779772	-0.0373199	0.00177978	0.328426	-0.0164652	-0.063757	0.0322013	0.111421	-0.0402445	0.172233	0.351565	-0.164951	0.0125809	0.181848	0.0528925	0.0650813	0.352487	0.192307	0.152966	0.431751	-0.304541	0.190684	-0.0707996	-0.062415	3	NA	Homoscedastic & Parametric	4.71333e-17	0.00980113	0.546013	0.280764	0.0782885	0.842544	0.736763
HORVU7Hr1G070010.7	-0.396718	-0.161872	-0.676631	-0.556662	-0.250011	-0.43007	-0.53704	-0.367662	-0.619	-0.455963	-0.609516	-0.16493	-0.330796	-0.508013	-0.443402	0.0842722	0.0520441	0.0496134	0.272701	0.247692	-0.0427035	0.320791	0.0991566	0.175157	0.305559	0.451976	0.103019	0.221814	0.34078	0.105437	0.158042	0.28779	0.132261	0.346759	0.506823	-0.541013	0.240029	-0.0518689	-0.438607	3	NA	Homoscedastic & Non-parametric	1.55653e-17	5.2946e-06	0.8447	0.946692	0.035904	0.857442	0.4917
HORVU6Hr1G056260.5	-0.254488	-0.438009	-0.23725	-0.145177	-0.151111	-0.175317	-0.0653753	-0.0689692	0.0554239	-0.0324626	-0.100744	0.0926297	-0.075417	-0.0500656	-0.128223	-0.0795552	-0.180368	-0.107054	0.189185	-0.0899616	-0.0524964	0.306211	0.252537	0.220578	0.125425	0.023776	-0.0608027	-0.0263234	-0.104315	-0.019389	0.153421	0.644244	0.109039	0.249292	0.491293	-0.320804	0.160482	-0.125225	-0.49933	3	NA	Homoscedastic & Non-parametric	6.57615e-18	0.372865	0.947323	0.402696	0.433514	0.989313	0.407005
HORVU5Hr1G112390.1;HORVU5Hr1G066080.1;HORVU1Hr1G071570.1;HORVU3Hr1G087380.1	-0.446428	-0.524792	-0.308938	-0.12036	-0.102338	-0.00191079	0.0829522	-0.10741	-0.134665	-0.271585	-0.412045	0.184203	0.0161229	-0.21498	-0.236333	-0.0259469	-0.125449	-0.276782	0.109997	-0.0102846	-0.0144957	0.577638	0.217818	0.366473	0.197701	0.360494	-0.124503	-0.0503888	0.136533	-0.0732914	0.0190788	0.594199	0.173758	0.455149	0.954367	-0.176754	0.32786	-0.0657988	-0.434912	3	NA	Homoscedastic & Non-parametric	1.31156e-13	0.229855	0.439656	0.463944	0.920648	0.428212	0.939801
HORVU5Hr1G122640.6	-0.163844	-0.667238	-0.111599	0.0167644	0.119204	0.00767748	-0.0108917	-0.213675	-0.0939162	-0.448974	-0.322804	0.0868949	-0.230498	-0.252607	-0.509326	-0.146239	0.000749821	-0.234147	0.227767	-0.103986	-0.120203	0.263213	0.0510137	0.152752	0.115235	0.242576	0.0538793	0.0155253	0.0439523	0.0328599	0.154679	0.391024	0.099296	0.231373	0.658263	-0.191159	0.173389	-0.264629	-0.551767	3	NA	Homoscedastic & Parametric	1.659e-15	0.273906	0.692425	0.223289	0.54497	0.659441	0.569357
HORVU1Hr1G022270.1	-0.419535	-0.680426	-0.162405	-0.143509	0.0305602	0.0476675	-0.0381597	0.0106287	-0.188841	-0.301051	-0.395709	0.1021	-0.138445	-0.386387	-0.271583	0.1713	-0.0912551	-0.213319	0.197301	-0.178978	-0.171674	0.157845	-0.0660614	-0.0811981	0.0192076	0.335469	-0.0218718	0.32871	0.229223	-0.0557949	-0.0283174	0.247054	0.0339571	0.331547	0.509887	-0.183576	0.297805	-0.0359336	-0.588746	3	NA	Homoscedastic & Parametric	9.02993e-15	0.338218	0.864376	0.489908	0.776	0.246203	0.832284
HORVU2Hr1G079020.1	-0.15197	-0.544833	-0.254386	-0.653631	-0.258332	-0.159789	-0.218072	-0.0662591	0.0922902	-0.235455	-0.154718	0.203647	-0.157248	-0.0240606	-0.26095	-0.0364996	0.118546	-0.088139	0.200908	-0.113006	0.036486	0.264431	-0.185099	0.139364	0.332824	0.519809	0.0421074	0.128811	0.154176	0.140449	0.243726	0.530324	0.245034	0.166668	0.617103	-0.319039	0.298634	0.0844996	-0.169022	3	NA	Homoscedastic & Parametric	1.33794e-14	0.0582399	0.831132	0.483383	0.35109	0.697484	0.997272
HORVU1Hr1G067910.1	-0.533401	-0.600446	-0.462191	-0.762161	-0.184949	-0.344894	-0.151151	-0.00708707	0.326272	-0.0693393	-0.162486	0.110774	-0.180229	-0.241198	-0.224183	0.0691331	0.131587	-0.192428	0.389645	0.0223991	-0.149024	0.469039	0.271556	0.0770916	0.376139	0.599147	0.0912103	0.347248	0.409233	0.313998	0.146038	0.289612	0.107258	0.288107	0.733896	-0.405155	0.213472	0.110207	-0.265173	3	NA	Homoscedastic & Parametric	4.28006e-11	0.00928794	0.280333	0.96395	0.300913	0.910553	0.814619
HORVU4Hr1G061500.4	-0.440356	-0.525911	-0.420539	-0.5694	-0.198714	-0.218318	-0.431022	-0.0467013	0.0721648	-0.1311	-0.0999303	-0.0536123	-0.3365	-0.0998412	-0.214472	0.119721	0.154284	-0.155474	0.259457	0.0427248	0.078141	0.14658	0.0882472	0.0389558	-0.0442297	0.350367	-0.106174	0.0411387	0.208182	0.278618	0.136881	0.352319	-0.108963	0.249299	0.451191	-0.317024	0.12721	-0.188451	-0.236705	3	NA	Homoscedastic & Parametric	5.10609e-16	0.0127831	0.264102	0.960569	0.308029	0.900721	0.537856
HORVU5Hr1G086610.1	-0.504946	-0.387226	-0.491505	-0.48345	-0.225468	-0.261301	-0.0395828	0.0404638	0.11186	-0.169853	-0.204124	-0.0138123	0.117877	-0.223105	-0.0995828	0.0139799	0.272667	-0.284672	0.0849786	0.0101369	0.0873987	0.0464796	-0.0255351	0.0398386	0.267911	0.477276	0.0425772	0.196748	0.299943	0.119228	-0.0188664	0.540127	0.0718131	0.0915773	0.427072	-0.275311	0.0484104	-0.161118	-0.321024	3	NA	Homoscedastic & Parametric	8.56401e-15	0.0156239	0.658437	0.974524	0.858337	0.888161	0.432383
HORVU3Hr1G059470.1	-0.328581	-0.396744	-0.399851	-0.503338	-0.218507	-0.257282	-0.0926667	0.0319646	-0.0580726	-0.479288	-0.150011	0.0336028	-0.113046	-0.246321	-0.292552	-0.0358988	-0.097255	-0.00545795	0.356295	0.093513	0.00192269	0.304734	0.081258	0.0551361	0.135778	0.24156	0.14392	0.074158	0.226401	-0.0124424	0.186354	0.352632	-0.0929298	0.328841	0.700702	-0.551435	0.0497967	-0.129559	-0.100369	3	NA	Homoscedastic & Parametric	1.15013e-14	0.00911476	0.819353	0.994733	0.670158	0.749735	0.811887
HORVU5Hr1G112790.6	-0.431463	-0.427284	-0.374912	-0.300535	-0.109286	-0.163758	-0.101037	0.170998	0.00547653	-0.0910607	-0.0426162	0.146386	-0.134687	-0.148472	-0.161177	-0.112458	0.100754	-0.404434	0.188436	-0.101655	-0.210635	0.329032	0.143182	0.0986541	0.151284	0.448782	-0.027861	0.0701578	0.21986	0.0780627	0.0577176	0.462429	-0.0447372	0.37271	0.723986	-0.339409	0.169787	-0.0321376	-0.29796	3	NA	Homoscedastic & Non-parametric	1.77069e-15	0.119917	0.603593	0.873851	0.782092	0.920337	0.739086
HORVU5Hr1G107510.2	-0.484291	-0.508073	-0.281488	-0.399212	-0.111097	-0.168467	-0.0876639	-0.060407	-0.0901782	-0.188147	-0.238978	0.0116204	-0.0780025	-0.332864	-0.249201	-0.119955	-0.0600212	-0.380973	0.237531	-0.200935	-0.260184	0.25989	0.0341073	-0.0835672	0.0847043	0.312732	-0.0107013	0.0610709	0.247138	-0.137592	-0.0852592	0.12921	0.0618522	0.198929	0.588221	-0.585278	0.0265697	-0.151774	-0.394848	3	NA	Homoscedastic & Parametric	9.81283e-15	0.114601	0.84741	0.810499	0.755949	0.726832	0.716251
HORVU1Hr1G071810.1	-0.547862	-0.169937	-0.553541	-0.226111	-0.0606356	-0.141281	-0.32176	-0.209985	0.232388	-0.164733	-0.11431	0.164245	-0.369473	0.015674	-0.35509	0.107403	-0.0312041	-0.0159668	0.222049	-0.00670966	0.0587351	0.46328	0.0138275	0.0649069	0.192735	0.290608	0.00585923	-0.00735766	0.136833	0.106741	0.812341	0.845471	-0.0119723	0.214486	0.788985	-0.601993	0.0111744	-0.218372	-0.397413	3	X1872	Homoscedastic & Non-parametric	8.9111e-15	0.101003	0.776324	0.755952	0.478401	0.848373	0.814702
HORVU3Hr1G107040.11	-0.405983	-0.202356	-0.513573	-0.441892	-0.0152526	-0.406823	-0.202512	0.0920914	0.0651597	-0.211045	-0.11276	0.135229	-0.294014	-0.209082	-0.108745	-0.0542157	0.0562532	-0.138522	0.149036	0.0384061	-0.205352	0.385591	-0.183975	-0.0487353	0.0964695	0.360525	0.087554	0.0885947	0.223873	0.0804397	0.545363	0.567464	-0.0770311	0.100967	0.716088	-0.561477	0.0495662	-0.07409	-0.31201	3	X1872	Homoscedastic & Non-parametric	9.17114e-16	0.0231168	0.240585	0.751247	0.781509	0.63164	0.384177
HORVU0Hr1G017020.1;HORVU2Hr1G013680.1	-0.565457	-0.55164	-0.484038	-0.356727	-0.16599	-0.431541	-0.177999	-0.117382	-0.197727	-0.316748	-0.274828	-0.126556	-0.434413	-0.258684	-0.412482	-0.130499	-0.214895	-0.240517	0.155883	-0.0411304	-0.238872	0.162242	-0.190298	-0.153964	-0.041879	0.116629	0.00430466	0.0814378	0.156202	-0.0383739	0.320186	0.801354	-0.192697	-0.0241195	0.657025	-0.553616	0.0665347	-0.165811	-0.32598	3	X1872	Heteroscedastic & Non-parametric	1.32763e-15	0.0309691	0.65455	0.787521	0.500471	0.805529	0.838702
HORVU4Hr1G027970.1	-0.538498	-0.103356	-0.289507	-0.158061	0.0485852	-0.0755607	0.0290327	-0.0412296	-0.0661196	-0.2522	-0.222295	0.113822	-0.057428	-0.114823	0.0173892	0.0244546	0.0883239	0.0782836	0.388877	-0.0619327	-0.0134293	0.0931129	0.218564	0.246573	0.259327	0.515558	0.107745	0.0585039	0.223843	0.0974067	-0.0691957	0.641437	0.0691965	0.401767	0.689671	-0.282494	0.124033	-0.369894	-0.473974	3	NA	Homoscedastic & Non-parametric	4.0698e-16	0.0640037	0.651145	0.839111	0.339102	0.697799	0.879362
HORVU6Hr1G051450.1	-0.48979	-0.1649	-0.436472	-0.181124	-0.121183	-0.166722	-0.167954	-0.040593	-0.0901082	-0.256095	-0.200061	-0.104616	-0.140407	-0.256045	-0.0394604	-0.0427175	-0.0841995	-0.210978	0.310289	0.0573668	-0.00507337	0.367686	0.0276227	-0.131672	-0.0277254	0.299842	-0.191675	-0.0400459	0.244381	0.137884	-0.00336179	0.438011	-0.0115253	0.108369	0.540017	-0.464978	0.00901463	-0.208678	-0.484929	3	NA	Homoscedastic & Non-parametric	2.77741e-17	0.0806751	0.815176	0.550821	0.675507	0.668399	0.913427
HORVU1Hr1G021700.1	-0.340024	-0.434552	-0.357275	-0.235772	0.0282592	-0.154053	-0.230841	0.282745	-0.0891894	-0.235023	-0.262978	0.0564694	-0.0207988	-0.116671	0.0174239	0.0485048	0.0229986	-0.0783938	0.360071	0.020471	-0.0503881	0.244964	0.111095	-0.0127729	0.130835	0.319989	0.0953672	0.15683	0.210168	0.101474	0.191033	0.303587	0.121439	0.176759	0.432155	-0.597082	0.0464869	-0.390421	-0.549552	3	X281	Homoscedastic & Parametric	3.16016e-17	0.0593847	0.537464	0.531992	0.117337	0.949257	0.627124
HORVU0Hr1G015820.1	-0.430193	-0.446296	-0.384632	-0.228471	-0.0294146	-0.137807	0.0693965	-0.0502117	-0.0564109	-0.327179	-0.142861	0.172551	-0.224617	-0.149587	-0.0658168	0.0903594	-0.0264331	0.126541	0.438963	-0.0332019	-0.0129317	0.246319	0.0869683	-0.0516014	0.283685	0.319008	0.0257904	0.00362462	0.172811	0.0680712	-0.0679726	0.387205	0.174159	0.148336	0.435574	-0.624727	0.00120991	-0.3491	-0.347211	3	NA	Homoscedastic & Parametric	3.95213e-16	0.0608414	0.890056	0.905377	0.281843	0.688829	0.740173
HORVU5Hr1G041730.4;HORVU3Hr1G064680.10	-0.477611	-0.523619	-0.3838	-0.209268	0.075095	-0.307743	-0.322418	0.0286396	0.011576	-0.289912	-0.0629643	0.142466	-0.407572	-0.109921	-0.0912408	-0.0423481	0.109855	-0.0459572	0.340885	0.0106853	-0.109766	0.332481	-0.00752768	0.0324164	0.133764	0.494689	-0.0295385	0.0625561	0.461928	0.227266	0.136282	0.3356	-0.128932	0.312221	0.639071	-0.61807	-0.0166922	-0.216603	-0.389129	3	NA	Homoscedastic & Parametric	2.50784e-13	0.0458914	0.696997	0.676484	0.542721	0.917014	0.935432
HORVU3Hr1G030760.2	-0.435991	-0.623555	-0.359505	-0.22655	0.0257058	-0.0663429	-0.429845	-0.110814	-0.0568337	-0.406877	-0.219036	0.11734	-0.420924	-0.00345798	-0.182028	0.127521	0.0146572	0.121904	0.301888	0.170138	-0.279714	0.301281	-0.227945	-0.0796245	0.171898	0.365916	0.0372604	-0.264285	0.369204	0.0131811	0.245881	0.378009	-0.0440129	0.0728558	0.643501	-0.767792	-0.160645	-0.450557	-0.900423	3	NA	Homoscedastic & Parametric	1.73027e-13	0.048323	0.900498	0.467831	0.068066	0.994642	0.856761
HORVU4Hr1G089590.18;HORVU5Hr1G015080.1	-0.447714	-0.385739	-0.132561	-0.367685	-0.227009	-0.412056	-0.0633143	-0.0393281	-0.300634	-0.340566	-0.411308	-0.247007	0.0141431	-0.301273	-0.0293725	-0.217045	0.10778	-0.122804	0.458746	-0.149581	-0.0918585	0.286082	0.111166	0.0698957	-0.0770494	0.210154	-0.049798	0.0473333	0.115396	0.0164836	0.274318	0.309859	-0.0314681	0.22541	0.459733	-0.55081	-0.0559758	-0.476853	-0.495284	3	NA	Homoscedastic & Parametric	3.73575e-16	0.142494	0.637396	0.716442	0.234321	0.303061	0.361688
HORVU2Hr1G111610.3	-0.0806865	-0.328961	-0.238844	-0.211652	-0.216638	-0.236914	-0.0122725	-0.185376	-0.0111748	-0.243368	-0.133068	0.180291	-0.178013	-0.161872	-0.122423	-0.0241135	0.104548	-0.0318131	0.205604	0.0985219	0.0939481	-0.104886	0.0956167	0.0800706	0.108039	0.278782	0.0199242	-0.0237938	0.20874	0.20874	0.17761	0.524867	0.106553	0.442194	0.605249	-0.0746843	0.314052	-0.191594	-0.411189	3	NA	Homoscedastic & Non-parametric	8.04264e-19	0.0490146	0.769302	0.644875	0.676661	0.923156	0.667444
HORVU7Hr1G107100.1;HORVU6Hr1G027620.2	-0.377501	-0.370828	-0.362908	-0.31209	-0.127162	-0.000465976	-0.0273546	-0.116819	0.0148682	-0.142802	-0.139271	0.0529458	-0.164581	-0.2306	-0.144437	-0.040776	-0.025514	-0.043527	0.258166	-0.0809481	-0.0115774	-0.292202	0.109352	0.00110113	0.0993563	0.31615	-0.0126124	-0.0231516	0.078659	0.0382656	0.18382	0.582375	0.110721	0.357011	0.626129	-0.145126	0.278507	0.0608958	-0.158747	3	NA	Homoscedastic & Non-parametric	1.23307e-18	0.0556221	0.634615	0.547916	0.0662289	0.639001	0.90445
HORVU5Hr1G076130.3	-0.486365	-0.526294	-0.289439	-0.113456	-0.122262	-0.0592883	0.0741091	0.122317	0.0183827	-0.0795102	-0.277153	0.357979	0.103313	-0.29748	-0.218409	-0.0496755	0.0237253	-0.180608	0.145736	-0.133542	0.0591253	-0.287793	-0.191168	0.0788901	0.279489	0.305962	0.153186	0.126888	0.0524428	0.0650366	0.41398	0.448275	0.121205	0.275901	0.781355	-0.0603629	0.248727	-0.00361142	-0.198441	3	NA	Homoscedastic & Non-parametric	1.24866e-15	0.398247	0.615676	0.249977	0.83076	0.919393	0.725865
HORVU6Hr1G034650.1	-0.489921	-0.504802	-0.332493	-0.172139	-0.197102	-0.0999726	-0.0169048	-0.00753572	-0.200049	-0.196233	-0.328282	0.0483314	0.0873306	-0.196513	-0.222027	0.00448572	-0.0805128	-0.288123	0.114187	-0.0667438	0.0430062	-0.274063	-0.00922863	0.0561892	0.0569755	0.172469	0.0443329	0.0880048	0.0281261	-0.0994925	0.253326	0.33871	-0.0292403	0.167532	0.49492	-0.233354	0.0936273	-0.186979	-0.604689	3	NA	Homoscedastic & Parametric	9.02945e-18	0.250434	0.383368	0.325666	0.40341	0.694253	0.786143
HORVU5Hr1G103330.3	-0.664263	-0.882465	-0.445671	-0.408492	-0.443515	-0.207891	-0.274891	-0.160061	-0.0878379	-0.387551	-0.581067	0.235693	-0.0021575	-0.115787	-0.306891	-0.0969977	-0.116274	-0.11102	0.0885735	-0.0347237	0.0353542	-0.515946	-0.0179873	0.318863	0.513741	0.329479	0.162844	-0.133936	-0.057893	-0.111645	0.580818	0.562185	0.423306	0.540711	0.902504	-0.226384	-0.0580739	-0.382414	-0.833889	3	NA	Homoscedastic & Non-parametric	3.8591e-14	0.050303	0.191706	0.0620018	0.193794	0.925735	0.499504
HORVU2Hr1G053290.6	-0.687331	-0.770091	-0.154542	-0.431414	-0.415996	-0.169671	-0.358925	-0.155782	-0.31047	-0.555742	-0.749755	0.277505	-0.00711688	-0.173783	-0.352169	0.0248441	-0.0846748	-0.250249	0.049861	-0.0946595	-0.0743934	-0.466108	-0.135643	0.291403	0.337126	0.399537	0.296135	0.100992	0.00830876	0.00344156	0.79866	0.656513	0.189205	0.477371	1.0335	-0.285844	-0.107098	-0.26608	-0.887782	3	NA	Homoscedastic & Non-parametric	7.03735e-14	0.12021	0.0471188	0.0251228	0.116129	0.310224	0.398665
HORVU3Hr1G063670.2	-0.414863	-0.58913	-0.342568	-0.294594	-0.200626	-0.183515	-0.106179	-0.0855166	-0.116248	-0.233138	-0.356788	0.10597	-0.0816711	-0.218652	-0.245012	0.0816273	0.0476338	-0.108898	0.26977	0.065928	0.0612059	-0.180278	0.108823	0.185126	0.266203	0.370657	0.203476	0.230936	0.192934	0.0882648	0.321864	0.607479	0.157619	0.285549	0.703168	-0.345398	0.149378	-0.120297	-0.364438	3	NA	Homoscedastic & Parametric	4.76374e-16	0.00681571	0.72155	0.357507	0.98788	0.876282	0.969828
HORVU1Hr1G085170.5;HORVU3Hr1G062590.1;HORVU7Hr1G081910.1	-0.601859	-0.732722	-0.455411	-0.6034	-0.595203	-0.40894	-0.167051	-0.227925	-0.0781795	-0.314698	-0.413165	0.0329262	0.0790874	-0.230061	-0.294537	-0.109196	-0.0956362	-0.170307	0.135435	0.0505297	0.0758821	-0.536757	0.0535189	0.249224	0.266628	0.378364	0.156015	0.0127401	0.0346885	0.0293221	0.228439	0.627407	0.208635	0.307703	0.609082	-0.343682	0.145646	-0.00692013	-0.336453	3	NA	Homoscedastic & Parametric	5.57207e-14	0.0132733	0.413131	0.292872	0.578838	0.64602	0.951327
HORVU0Hr1G026030.2;HORVU1Hr1G068170.1	-0.392081	-0.628404	-0.28455	-0.487909	-0.266136	-0.200098	-0.034658	-0.101615	-0.196354	-0.323309	-0.361417	0.140048	0.0925171	-0.180391	-0.4066	0.0300028	-0.0346739	-0.277752	0.19339	-0.0582	0.0216607	-0.269365	0.000900564	0.179841	0.241989	0.327129	0.204839	0.215053	0.152604	0.0172886	0.139254	0.279856	0.105943	0.248422	0.468271	-0.220301	0.223124	0.011859	-0.347717	3	NA	Homoscedastic & Parametric	2.26533e-16	0.0267193	0.353114	0.183834	0.665764	0.878688	0.980374
HORVU4Hr1G088140.2	-0.48553	-0.536595	-0.36996	-0.492761	-0.415468	-0.20281	-0.137549	0.0112051	-0.139806	-0.293744	-0.366504	-0.171617	-0.00861561	-0.298962	-0.284712	0.012929	-0.0786512	-0.317092	0.0648516	0.00960005	-0.0589816	-0.297784	0.0709983	0.0766157	0.134199	0.29028	0.0829555	0.199377	0.20216	0.0389572	0.150347	0.412421	0.109834	0.321089	0.503025	-0.066717	0.221315	0.142987	-0.24343	3	NA	Homoscedastic & Parametric	2.7213e-16	0.00355145	0.966335	0.761636	0.0302407	0.650498	0.496664
HORVU7Hr1G057470.1	-0.99855	-1.19688	-0.703901	-0.656248	-0.53839	-0.382473	-0.768968	-0.361748	-0.985145	-1.20731	-1.24905	-0.0861783	-0.017971	0.0463863	-0.488258	0.368003	0.0367013	-0.424839	-0.0919821	0.0246466	-0.129975	-0.872025	0.112039	0.662309	0.579438	0.353171	0.553602	-0.0882145	0.547345	0.236513	0.738183	0.641881	0.34135	0.964066	1.11016	-0.0999948	-0.0277128	-0.16335	-1.15626	3	NA	Homoscedastic & Non-parametric	1.62481e-10	0.00312146	0.0235915	0.0257268	0.833676	0.321113	0.43713
HORVU3Hr1G052280.1	-0.0374345	-0.295949	-0.263876	-0.272769	-0.12628	-0.0575322	0.199799	-0.0553043	-0.115334	-0.278945	-0.30843	-0.0645669	-0.0907324	-0.307189	-0.1918	0.0759889	0.0957503	0.155928	0.322319	-0.0105501	-0.0402602	0.203262	0.144868	0.0821484	0.423519	0.380879	0.115769	0.119582	0.222655	0.213953	0.21246	0.442274	0.0366806	0.321031	0.667873	-0.190717	0.322692	-0.27108	-0.447835	3	NA	Homoscedastic & Parametric	6.12061e-15	0.00681333	0.596032	0.585727	0.601622	0.730718	0.652728
HORVU2Hr1G028510.1	-0.102398	-0.792584	0.000581012	-0.102445	-0.147509	-0.144683	-0.0025202	-0.0984066	-0.203144	-0.444879	-0.37109	0.0787321	-0.46213	-0.161086	0.00633104	0.224737	0.141212	0.307431	0.463892	0.155129	0.0196623	0.19158	-0.124076	0.103931	0.203495	0.314049	0.304075	0.0542655	0.260749	0.134545	0.567749	0.517018	-0.149024	0.0292852	0.658453	-0.233269	0.228954	-0.278701	-0.571511	3	NA	Homoscedastic & Parametric	2.37794e-13	0.0373279	0.661515	0.517334	0.716123	0.834905	0.769345
HORVU7Hr1G018100.3;HORVU7Hr1G018110.1	-0.340412	-0.625392	-0.210333	-0.207074	-0.111974	-0.195786	-0.123239	0.0418446	-0.0882817	-0.284994	-0.303282	0.0225244	-0.138905	-0.188221	-0.110481	-0.0511242	-0.045128	0.128536	0.252656	-0.0956909	-0.204379	0.161012	-0.22369	-0.0825767	0.0352097	0.283368	0.106313	0.0270412	0.187171	0.0163496	0.387917	0.38363	-0.0360907	0.114774	0.493465	-0.333981	0.118582	-0.275204	-0.452281	3	NA	Homoscedastic & Parametric	6.73284e-17	0.140641	0.946466	0.366572	0.569515	0.725388	0.644016
HORVU2Hr1G124790.1;HORVU3Hr1G109340.1	-0.291316	-0.632509	-0.218085	-0.274917	-0.142658	-0.311898	-0.0405276	-0.180448	-0.0289296	-0.240842	-0.261485	0.0260783	-0.182233	-0.161493	-0.266015	-0.00778659	0.117861	-0.0236752	0.314291	0.0583716	0.0690554	0.240831	-0.067078	-0.04761	0.19423	0.286174	0.0265397	0.0404086	0.0281482	0.0478516	0.37127	0.350365	0.095638	-0.0383765	0.562038	-0.376099	0.304563	-0.19518	-0.717208	3	NA	Homoscedastic & Parametric	1.27313e-15	0.106041	0.911192	0.367092	0.79166	0.54907	0.44805
HORVU6Hr1G077540.1	-0.301464	-0.41122	-0.407698	-0.388118	-0.338536	-0.237045	-0.135873	-0.0199392	-0.259655	-0.329671	-0.225689	0.194829	-0.0206683	-0.166913	-0.0884184	0.0680855	0.0939973	0.102373	0.245329	0.0358997	0.00626221	0.264833	-0.0455074	0.0827442	0.0533703	0.359221	-0.0325129	-0.0794524	0.0633788	0.0560415	0.199806	0.371561	0.112214	0.00209323	0.454339	-0.344919	0.109727	-0.00962592	-0.662167	3	NA	Homoscedastic & Parametric	6.87574e-17	0.130223	0.41831	0.554505	0.675673	0.200027	0.518219
HORVU1Hr1G000960.10	-0.271056	-0.520039	-0.173265	-0.239823	-0.195598	-0.0246589	-0.199619	-0.0774001	-0.155495	-0.434582	-0.257852	0.160355	-0.212652	-0.349431	-0.119494	0.0928028	-0.0277562	0.236701	0.237174	0.322244	-0.00561842	0.168471	0.00752248	0.102793	0.0925562	0.264523	-0.0298636	-0.127154	-0.0313769	-0.0283823	0.150901	0.259118	-0.105864	0.229714	0.582672	-0.122227	0.267039	-0.158336	-0.628912	3	NA	Homoscedastic & Parametric	2.58723e-15	0.0630319	0.634202	0.667457	0.861901	0.809548	0.772684
HORVU4Hr1G054910.1	-0.165603	-0.752684	-0.247548	-0.484574	-0.229989	-0.271476	-0.209963	0.202133	-0.287459	-0.2426	-0.280888	0.107833	-0.28063	0.035327	-0.4196	0.0762943	-0.0192339	0.140123	0.315794	0.0416668	-0.117158	0.260195	0.013238	-0.0025699	0.194431	0.351303	0.0652703	0.0576297	0.138975	-0.108486	0.178439	0.29287	0.162374	0.174763	0.635941	-0.488306	-0.0176565	-0.470067	-0.388308	3	NA	Homoscedastic & Parametric	7.23935e-16	0.0546279	0.856265	0.145472	0.269609	0.789523	0.394272
HORVU4Hr1G064230.5	-0.169488	-0.0224874	-0.268136	-0.19567	-0.0657427	-0.0835517	-0.113788	-0.0787861	-0.0631328	-0.194532	-0.397314	0.041484	0.0839947	-0.249071	0.0865247	0.0783631	-0.052725	0.0547278	0.2878	0.108372	0.0350817	0.396286	0.0781818	0.121231	0.179601	0.372154	0.285011	0.177402	0.278607	0.0290691	0.383133	0.450906	0.0824622	0.2563	0.682908	-0.261947	0.0378209	-0.168521	-0.707404	3	NA	Homoscedastic & Parametric	8.6007e-17	0.0102728	0.977075	0.922366	0.318865	0.939881	0.476062
HORVU1Hr1G053320.10	-0.542743	-0.373859	-0.513952	-0.341853	-0.234073	-0.234073	-0.134001	0.00965626	0.0382244	-0.196858	-0.22652	0.0907103	0.0757339	-0.10451	-0.114273	0.150832	-0.00318304	-0.0679522	0.262863	0.0194504	0.126373	0.224172	-0.00331404	0.169496	0.265763	0.324161	0.152505	0.217308	0.10247	0.0624033	0.0249268	0.555935	-0.149097	0.201994	0.325124	-0.592719	-0.0928876	-0.329916	-0.690479	3	X279	Homoscedastic & Parametric	4.41176e-16	0.0241372	0.820062	0.590481	0.0918906	0.661294	0.984058
HORVU1Hr1G072060.1;HORVU3Hr1G086930.1	-0.395864	-0.349466	-0.33718	-0.359005	-0.200268	-0.212691	-0.269436	-0.116929	-0.268737	-0.246048	-0.343756	-0.0749595	-0.0607514	-0.341648	-0.120414	-0.0225519	-0.0012858	-0.146175	0.25525	0.122336	0.00561633	0.35347	0.0849984	-0.0485924	-0.00414359	0.325486	0.236265	0.222629	0.212787	0.0674715	0.29166	0.364803	-0.0616423	0.160933	0.33886	-0.557621	-0.141691	-0.164121	-0.472919	3	NA	Homoscedastic & Parametric	2.67278e-18	0.00171376	0.896685	0.80051	0.441482	0.474143	0.835788
HORVU1Hr1G090490.1	-0.453116	-0.499247	-0.340869	-0.476355	-0.266233	-0.165006	-0.189799	-0.0483178	-0.195883	-0.0947101	-0.350446	-0.0260991	-0.070812	-0.302597	-0.273624	0.0670182	-0.0298002	-0.0694068	0.232903	-0.10474	0.0331953	0.315461	0.0230802	0.139139	0.148997	0.297622	0.205727	0.365178	0.116178	-0.0253003	0.0948018	0.204502	-0.0149483	0.108419	0.386946	-0.565494	-0.195018	-0.25701	-0.599922	3	NA	Homoscedastic & Parametric	3.3137e-18	0.001734	0.796654	0.616945	0.209093	0.486687	0.895671
HORVU1Hr1G024710.2	-0.236914	-0.523823	-0.220347	-0.290971	-0.0612457	-0.139284	-0.13311	0.0717862	-0.288123	-0.126463	-0.576635	0.0811669	0.0429064	-0.275617	-0.106831	0.131208	-0.0488264	-0.145629	0.291411	0.120487	0.141191	0.141877	0.046917	0.104186	0.0969183	0.268513	0.29362	0.308625	0.133329	-0.111228	0.31214	0.341022	0.0731312	0.0424339	0.636684	-0.348296	0.0691408	-0.065788	-0.363897	3	NA	Homoscedastic & Parametric	1.92155e-16	0.0248002	0.993832	0.253655	0.764502	0.930022	0.849172
HORVU3Hr1G089630.1;HORVU0Hr1G007150.1	-0.36195	-0.468497	-0.266088	-0.422203	-0.405495	-0.263309	-0.0052092	-0.00998747	0.117277	0.035397	-0.116232	-0.100935	0.085876	-0.193057	-0.119969	0.0538911	-0.0347613	-0.139206	0.168088	0.152652	-0.00837211	0.193999	0.13108	0.156604	0.0854426	0.3085	0.0399194	0.117339	0.138395	-0.0153082	0.313047	0.47496	0.0432187	0.255097	0.540958	-0.179602	0.13492	-0.264401	-0.678264	3	NA	Homoscedastic & Parametric	2.28081e-16	0.0208873	0.637899	0.898415	0.727953	0.827189	0.654747
HORVU5Hr1G112380.1	-0.349154	-0.335894	-0.329267	-0.303883	-0.25255	-0.161692	-0.214389	-0.0597503	-0.0840179	-0.186132	-0.119869	0.073411	0.105087	-0.225026	-0.0970484	-0.043481	0.0298823	-0.139207	0.149188	0.363285	-0.0454701	0.21852	0.0657258	0.0682026	0.0878916	0.141758	0.193595	0.00899104	0.162718	-0.0420888	0.295079	0.127088	-0.0702391	0.162396	0.418741	-0.345102	0.0854691	-0.0674112	-0.59401	3	NA	Homoscedastic & Parametric	1.67063e-18	0.00407144	0.599727	0.594034	0.486498	0.66538	0.342394
HORVU7Hr1G039570.1	-0.377206	-0.21578	-0.293923	-0.29926	-0.171806	-0.10512	-0.0731108	0.0581156	-0.065278	-0.187602	-0.246203	0.0672032	-0.0443558	-0.237235	-0.0749383	0.0812463	0.0887062	-0.0335006	0.207188	0.0764666	0.138625	0.397132	0.173591	0.244335	0.270401	0.219481	-0.0163259	0.00786017	0.0320089	0.227648	0.27715	0.261734	0.325961	0.320596	0.558781	-0.288588	0.0648311	-0.201704	-0.457845	3	NA	Homoscedastic & Parametric	4.16729e-19	0.00546743	0.905733	0.902558	0.629881	0.805322	0.939156
HORVU2Hr1G038990.1	-0.822402	-0.124871	-0.550377	-0.483076	-0.504737	-0.172343	-0.438588	-0.0554706	-0.244394	-0.366331	-0.345017	-0.0121419	0.0481311	-0.350966	-0.119702	0.0501929	-0.119165	-0.138514	0.24588	0.0473285	0.192927	0.345908	0.138706	0.243738	0.357796	0.226093	0.217658	0.0874371	0.0813433	-0.000120565	0.388756	0.36923	0.365428	0.402096	0.519316	-0.171236	0.0753414	-0.126279	-0.633879	3	NA	Homoscedastic & Parametric	8.2654e-16	0.000589632	0.375254	0.915771	0.687724	0.866222	0.453995
HORVU1Hr1G020390.1	-0.529269	-0.497899	-0.342219	-0.108002	-0.00508735	-0.0905582	-0.118888	-0.0428848	-0.144812	-0.323703	-0.207187	0.209024	0.000885267	-0.231849	-0.0328845	0.0509714	0.108784	0.0682113	0.313619	0.0601312	0.11519	0.189118	0.0952637	0.141573	0.410657	0.471003	0.0081735	0.00790755	0.258292	0.109599	0.215899	0.416885	0.421192	0.414194	0.398842	-0.242226	0.0323829	-0.124051	-0.485303	3	NA	Homoscedastic & Parametric	1.12041e-17	0.0177304	0.349367	0.416691	0.392439	0.543299	0.771156
HORVU5Hr1G028260.1	-0.687618	-0.76102	-0.605106	-0.298758	-0.193194	-0.116388	-0.327202	-0.277074	-0.294887	-0.334364	-0.405472	0.100238	-0.192636	-0.348105	-0.235088	0.0878518	0.043439	-0.150911	0.0860991	0.0132952	-0.00139287	0.392192	0.238768	0.10636	0.24974	0.381605	-0.193541	-0.132484	0.219106	0.0780412	0.0912899	0.354973	0.115665	0.286838	0.499228	-0.395528	0.0146318	-0.296329	-0.533646	3	NA	Homoscedastic & Parametric	6.54393e-15	0.0139131	0.524888	0.502891	0.811698	0.341804	0.776809
HORVU2Hr1G009840.1	-0.630595	-0.579041	-0.549976	-0.104733	0.0777925	-0.0710018	-0.265401	-0.110229	0.119159	-0.175132	-0.257618	0.119933	-0.172682	-0.280549	-0.226985	-0.00177544	0.070412	-0.267867	0.0977038	-0.0952969	-0.103973	0.321043	0.196755	0.0360243	0.168569	0.319119	-0.085622	-0.0578863	0.169172	0.128342	0.158491	-0.0439728	0.136985	0.157463	0.398001	-0.431253	0.0424569	-0.206362	-0.551566	3	NA	Homoscedastic & Parametric	1.75822e-15	0.0912375	0.659475	0.536714	0.569498	0.7861	0.761826
HORVU6Hr1G057570.8	-0.300327	-0.314115	-0.250232	-0.27335	-0.104706	-0.104012	0.0662438	0.0204773	-0.0184633	-0.183208	-0.185462	0.0895568	-0.0811012	-0.192149	-0.149234	0.0899316	-0.057432	-0.211278	0.436595	0.010516	0.184654	0.116142	0.114709	0.095374	0.305586	0.41544	0.0218577	0.193203	0.0012075	0.0273212	0.203105	0.391186	0.141702	0.342789	0.667252	-0.0363345	0.32082	-0.0788868	-0.275617	3	X589	Homoscedastic & Non-parametric	1.06958e-17	0.0606542	0.847335	0.97831	0.282013	0.818794	0.86628
HORVU6Hr1G076430.4	-0.350724	-0.386436	-0.349535	-0.274987	-0.189809	-0.157996	-0.103599	-0.090349	-0.125793	-0.210897	-0.16707	0.032715	-0.176918	-0.248194	-0.204815	0.0533708	0.0286654	-0.118769	0.302284	0.120632	0.0535841	0.179545	0.10278	0.0420801	0.160055	0.250117	0.000692752	0.0644977	0.135986	0.0643721	0.0533902	0.274894	0.0560699	0.237863	0.490853	-0.100323	0.296903	-0.101809	-0.359472	3	X589	Homoscedastic & Parametric	2.37729e-18	0.00633591	0.952523	0.975042	0.182849	0.879331	0.980443
HORVU1Hr1G064630.6	-0.309328	-0.610547	-0.270321	-0.257713	-0.287557	0.0216175	-0.0568432	-0.152659	-0.0783635	-0.347916	-0.334714	0.095586	-0.137759	-0.274997	-0.228019	-0.193913	-0.0281265	-0.303182	0.345849	-0.0187371	0.0659615	-0.050164	-0.0411676	0.0876684	0.241157	0.402568	-0.0358343	0.126621	0.133953	0.268335	0.203919	0.396695	0.248645	0.334795	0.365847	-0.124631	0.237474	-0.12803	-0.421266	3	NA	Homoscedastic & Parametric	7.08435e-16	0.0541876	0.617181	0.64986	0.609945	0.813274	0.748038
HORVU7Hr1G036160.1	-0.454045	-0.383091	-0.174983	-0.248321	-0.0729606	-0.097642	0.125406	-0.0231843	-0.0988002	-0.226334	-0.187784	0.0698031	0.0620565	-0.321131	-0.0471974	-0.0501369	0.0447585	-0.184798	0.308132	-0.12592	-0.0557762	0.341384	0.108502	0.0971273	0.195013	0.438127	0.0163516	0.172156	0.147844	0.0221312	0.257935	0.41233	0.00310919	0.308529	0.493657	-0.275187	0.209085	-0.167922	-0.519463	3	NA	Homoscedastic & Parametric	5.5978e-16	0.151858	0.696744	0.969825	0.728295	0.280786	0.87895
HORVU3Hr1G087360.2	-0.388049	-0.482949	-0.218086	-0.368036	-0.276237	-0.265696	0.0489967	-0.0445214	-0.239686	-0.370634	-0.35743	0.124571	0.0798575	-0.388283	-0.129209	-0.0329675	-0.0174805	-0.204382	0.134988	-0.0294101	-0.0271913	0.176314	-0.00850895	-0.0079194	0.0545687	0.296294	0.0170456	-0.0100421	-0.0336856	-0.0814547	0.106479	0.288772	0.0142463	0.0688549	0.469482	-0.25858	0.170951	-0.0496242	-0.392448	3	NA	Homoscedastic & Parametric	2.32583e-17	0.233474	0.337243	0.478964	0.868419	0.209274	0.773931
HORVU2Hr1G113410.2;HORVU2Hr1G113450.2	-0.354712	-0.322353	-0.342274	-0.332219	-0.104654	-0.12988	-0.12915	-0.0281172	0.098591	-0.13516	-0.18305	0.119813	0.00953666	-0.231123	-0.0676812	-0.0186684	-0.0186417	-0.000140087	0.263081	0.0381631	-0.032179	0.215805	-0.158424	0.0659047	0.17653	0.328949	0.0639842	0.136255	0.167742	-0.150826	0.0736013	0.447617	0.176852	0.147741	0.494885	-0.251614	0.0832021	-0.0831942	-0.374142	3	NA	Homoscedastic & Parametric	9.36327e-18	0.0263843	0.689987	0.858105	0.979917	0.95782	0.520809
HORVU5Hr1G072560.1	-0.339022	-0.536834	-0.316293	-0.23949	-0.135136	-0.0692818	-0.241628	-0.0273074	-0.0117044	-0.170426	-0.16374	-0.0289365	-0.384464	-0.180002	-0.219556	0.0234398	0.0688768	-0.0581905	0.289103	-0.145046	-0.0333727	0.0341056	0.16623	-0.0379711	0.109118	0.407225	-0.0167266	0.0361857	0.243354	0.178262	0.213679	0.448142	0.147563	0.330992	0.65769	-0.44659	0.0801809	-0.160721	-0.443233	3	NA	Homoscedastic & Parametric	3.50894e-16	0.0367322	0.471552	0.920139	0.994542	0.960137	0.561379
HORVU6Hr1G005730.2	-0.393913	-0.349646	-0.363637	-0.237523	-0.0652253	-0.190751	-0.254349	-0.126689	0.106636	-0.231369	-0.207126	-0.142729	-0.289136	-0.22505	-0.0981503	0.0246727	-0.0324398	0.0349381	0.255224	0.0282216	-0.111151	0.136635	0.0188759	-0.0108982	0.142582	0.241727	-0.0940597	-0.0207396	0.0458225	-0.0136395	0.183127	0.38414	0.189601	0.345276	0.676184	-0.379642	0.056785	-0.173554	-0.293219	3	NA	Homoscedastic & Non-parametric	1.35412e-20	0.00583121	0.211888	0.729214	0.529483	0.535736	0.884622
HORVU3Hr1G113820.3	-0.227134	-0.637028	-0.28442	-0.232933	-0.105105	-0.119207	-0.244075	-0.139017	-0.0745366	-0.269553	-0.347477	0.155286	-0.106208	-0.129015	-0.23106	0.054553	-0.0350279	0.0968882	0.212288	0.138494	0.0145811	0.149748	-0.138487	0.0698147	0.209129	0.252533	0.0549924	-0.0784199	0.110057	0.0399846	0.227099	0.382882	0.00347639	0.124491	0.560438	-0.21324	0.0515646	-0.227845	-0.442214	3	NA	Homoscedastic & Parametric	1.39413e-18	0.0284554	0.651853	0.10208	0.470843	0.992779	0.500903
HORVU6Hr1G067630.1;HORVU0Hr1G032110.1;HORVU0Hr1G016640.4	-0.334446	-0.64538	-0.268743	-0.228437	-0.212542	-0.215399	-0.190612	-0.0523431	0.0250534	-0.293764	-0.161078	-0.0117958	-0.236076	0.00202041	-0.191047	0.0399656	-0.0313178	-0.00642848	0.251408	0.049246	0.0394594	0.0788907	0.0214096	0.016226	0.272299	0.230048	-0.0230591	0.0135273	0.0429954	-0.0067691	0.213729	0.472484	0.317333	0.258432	0.528132	-0.2916	0.206403	-0.410245	-0.351427	3	NA	Homoscedastic & Parametric	1.51343e-18	0.0363803	0.833012	0.272967	0.695831	0.919156	0.490999
HORVU2Hr1G068360.8	-0.322059	-0.596101	-0.260344	-0.332343	-0.262886	-0.212489	-0.220385	-0.0598362	-0.108109	-0.39759	-0.330301	0.087007	-0.223737	-0.0960092	-0.237964	0.107944	-0.0497833	0.0292687	0.179461	0.00173615	0.00771751	0.125812	0.0447211	0.17129	0.220146	0.273686	0.117838	-0.0855351	0.117858	0.0765862	0.644777	0.574021	0.191149	0.411586	0.940223	-0.383111	0.0786178	-0.402571	-0.497534	3	NA	Homoscedastic & Non-parametric	3.83307e-18	0.0167175	0.553005	0.176014	0.300588	0.844566	0.453423
HORVU2Hr1G014580.1	-0.275497	-0.638356	-0.183834	-0.231844	-0.168495	-0.224682	-0.232419	-0.0433915	0.0228988	-0.218785	-0.259101	0.00191685	-0.207061	-0.119135	-0.133628	0.0768887	0.0673277	-0.0751568	0.190564	0.0379104	-0.0126807	0.135891	0.143127	0.205311	0.189233	0.324954	0.0131698	0.0521851	0.224466	0.127924	0.297033	0.433296	0.0875459	0.341443	0.608596	-0.413962	0.11203	-0.345832	-0.513595	3	X109	Homoscedastic & Parametric	2.20677e-18	0.00780372	0.905006	0.226558	0.315045	0.922218	0.675597
HORVU7Hr1G034140.1;HORVU6Hr1G084940.1	-0.317904	-0.600144	-0.27227	-0.252281	-0.148695	-0.114827	-0.252298	-0.0445333	-0.0484421	-0.279518	-0.242359	0.0487471	-0.2265	-0.146576	-0.266089	0.0459771	-0.012831	-0.191053	0.210111	0.0220188	-0.0542582	0.197795	0.0987267	0.0626559	0.219784	0.363791	-0.0212282	0.0162397	0.226987	0.0732007	0.28257	0.585407	0.151621	0.449334	0.77817	-0.33752	0.189966	-0.241863	-0.464399	3	X109	Homoscedastic & Non-parametric	8.94781e-18	0.0263143	0.989551	0.299969	0.82843	0.905518	0.674616
HORVU6Hr1G091690.4	-0.345771	-0.496974	-0.259844	-0.244868	-0.125183	-0.160874	-0.148222	0.00323292	-0.085527	-0.285905	-0.267368	0.0521075	-0.18808	-0.140225	-0.203319	0.0586631	-0.0232145	-0.117186	0.268346	-0.0223204	-0.00882574	0.262046	0.0640184	0.059623	0.100014	0.294987	-0.00273565	0.0661653	0.161279	0.0646883	0.377757	0.519247	0.0970861	0.281969	0.678785	-0.384412	0.149336	-0.193224	-0.444909	3	X109	Homoscedastic & Non-parametric	5.17203e-19	0.0510499	0.921171	0.353673	0.671611	0.588272	0.478495
HORVU4Hr1G040660.1	-0.398413	-0.611838	-0.343863	-0.341451	-0.211742	-0.285507	-0.177887	-0.128846	-0.142887	-0.248658	-0.329902	-0.0507928	-0.217559	-0.215937	-0.342846	-0.042318	-0.0235839	-0.187662	0.211478	-0.0206973	-0.0256106	0.240494	-0.0275849	0.0253692	0.170951	0.327298	0.0625215	0.0901943	0.179771	0.0438854	0.28042	0.572165	0.121806	0.298075	0.68738	-0.462889	0.0341289	-0.232424	-0.504493	3	X109	Homoscedastic & Non-parametric	4.95749e-19	0.00523465	0.947278	0.287161	0.68525	0.852953	0.700248
HORVU7Hr1G088080.1	-0.332371	-0.594641	-0.241818	-0.273745	-0.195925	-0.177934	-0.279984	-0.0774695	-0.132905	-0.29986	-0.313915	-0.00774847	-0.0994788	-0.123946	-0.293139	0.00104734	-0.0309123	-0.112227	0.271107	-0.0421245	-0.0321804	0.260436	0.065964	0.156058	0.172832	0.327597	0.106629	0.0494438	0.151489	0.0188941	0.423557	0.531335	0.199081	0.356834	0.647021	-0.361575	0.16641	-0.365874	-0.531548	3	X109	Homoscedastic & Parametric	7.14413e-18	0.0194757	0.619885	0.149937	0.423089	0.629888	0.560366
HORVU7Hr1G044070.2	-0.328225	-0.456159	-0.241505	-0.172506	-0.0955797	-0.0508473	-0.273307	-0.0495647	-0.0859526	-0.313103	-0.326187	0.129556	-0.225778	-0.191087	-0.20944	0.0568993	0.0745951	-0.0524324	0.238839	-0.0641781	-0.0847372	0.234301	-0.00230262	0.0791898	0.187248	0.346208	0.009003	0.0124817	0.178359	0.072375	0.299131	0.405129	0.0767851	0.36646	0.789084	-0.414001	0.104262	-0.288968	-0.535198	3	X109	Homoscedastic & Non-parametric	7.61585e-18	0.0715062	0.754988	0.289738	0.298443	0.534135	0.559348
HORVU5Hr1G106380.6	-0.266895	-0.395108	-0.258806	-0.149047	-0.063572	-0.067047	-0.285192	-0.0581188	-0.0338173	-0.271843	-0.294215	-0.00556567	-0.19281	-0.167728	-0.174193	0.0159486	0.0263259	-0.112566	0.154685	-0.0154834	-0.0604324	0.00782254	0.144175	0.127898	0.215814	0.283118	-0.0100711	-0.0308838	0.129411	0.110487	0.196584	0.401757	0.126644	0.331273	0.624567	-0.294635	0.166552	-0.318801	-0.503475	3	X109	Homoscedastic & Parametric	3.04024e-18	0.022323	0.875311	0.455065	0.602473	0.7543	0.818709
HORVU4Hr1G068820.1	-0.417974	-0.628996	-0.216865	-0.186314	-0.246474	-0.177231	-0.199875	-0.0947576	-0.0613501	-0.364954	-0.364011	0.0905245	-0.101154	-0.194073	-0.241248	0.0269062	-0.0404975	-0.0819408	0.131697	0.0527685	0.0153555	0.160169	-0.0254506	0.115477	0.247393	0.342809	0.0898094	0.0141022	0.131001	0.0171204	0.281519	0.507311	0.166411	0.382977	0.721928	-0.254077	0.0978055	-0.246474	-0.51134	3	X109	Homoscedastic & Parametric	9.12581e-18	0.0267283	0.352261	0.121772	0.457296	0.611206	0.754358
HORVU6Hr1G066550.1;HORVU0Hr1G027680.1	-0.382215	-0.576778	-0.349063	-0.237236	-0.167615	-0.14395	-0.156115	-0.107069	-0.104428	-0.340048	-0.356543	0.0877519	-0.0775938	-0.200977	-0.265004	-0.0236425	-0.00170071	0.0237875	0.25948	-0.0323695	0.0498678	0.228835	0.0115583	0.108434	0.194948	0.234899	0.015218	-0.077436	0.0722414	0.0853178	0.220097	0.367429	0.225505	0.260564	0.558032	-0.290183	0.0849697	-0.198308	-0.514417	3	X109	Homoscedastic & Parametric	5.35178e-19	0.0287185	0.529504	0.199756	0.56542	0.630782	0.30353
HORVU5Hr1G092610.3	-0.43167	-0.468687	-0.323472	-0.319868	-0.256334	-0.231504	-0.134333	-0.0645418	-0.296658	-0.398314	-0.490614	0.0496975	-0.0521121	-0.386883	-0.260805	-0.0450696	-0.140493	-0.249661	0.176664	0.0299243	-0.103333	0.261876	-0.129285	0.0164579	0.132017	0.208354	0.0425338	0.0725865	0.040374	-0.12985	0.283044	0.4327	0.119456	0.448927	0.767308	-0.370538	0.116424	-0.270293	-0.596288	3	NA	Homoscedastic & Non-parametric	2.30607e-17	0.0461102	0.468199	0.344558	0.635763	0.482566	0.99008
HORVU7Hr1G069230.2	-0.352387	-0.558214	-0.306288	-0.383544	-0.302707	-0.263576	-0.300923	-0.161444	-0.186014	-0.443203	-0.399296	-0.028226	-0.269141	-0.312552	-0.360301	-0.00911466	-0.0519425	-0.245555	0.208877	-0.0138161	-0.0895943	0.234625	-0.0242179	-0.00668547	0.14208	0.323503	-0.174159	-0.0516787	0.126456	-0.028576	0.111549	0.472545	0.22146	0.405056	0.786283	-0.332933	0.243253	-0.230504	-0.345867	3	NA	Homoscedastic & Non-parametric	1.23548e-17	0.0262141	0.793818	0.318464	0.381402	0.53543	0.597767
HORVU0Hr1G004700.1	-0.431692	-0.614197	-0.305293	-0.253506	-0.12994	-0.215408	-0.232466	-0.279921	-0.16804	-0.346346	-0.28795	-0.0604292	-0.282469	-0.0572195	-0.0738942	0.156018	-0.0299131	-0.15972	0.340427	0.132809	-0.167738	0.214919	0.127369	0.0303841	0.176315	0.147084	-0.22679	-0.0229284	0.024969	-0.0450078	0.260565	0.499471	0.18596	0.458419	0.610425	-0.360988	0.0571109	-0.235244	-0.626367	3	NA	Homoscedastic & Parametric	8.32421e-17	0.0637715	0.540309	0.505596	0.547075	0.396679	0.645843
HORVU7Hr1G087210.1	-0.445433	-0.58471	-0.296811	-0.353996	-0.150058	-0.160139	-0.188928	-0.116904	-0.0751417	-0.219777	-0.207778	-0.0164397	-0.15992	-0.108569	-0.247386	0.137324	0.0293246	-0.12895	0.225326	0.141062	-0.174274	0.270383	0.144356	0.113461	0.17908	0.414192	0.0835102	0.130311	0.267146	0.0680666	0.169007	0.422883	0.0683337	0.397611	0.661745	-0.261798	0.130111	-0.0415568	-0.356418	3	NA	Homoscedastic & Parametric	9.95325e-17	0.00456581	0.913397	0.50186	0.637084	0.693114	0.72015
HORVU7Hr1G106150.2	-0.4101	-0.547416	-0.308221	-0.44942	-0.260654	-0.210578	0.0174198	0.0412285	-0.128108	-0.190832	-0.23494	0.0361597	-0.0417044	-0.208522	-0.157769	0.0201135	0.0716136	-0.216887	0.404937	-0.0623684	-0.0661894	0.305491	0.176563	0.161373	0.217013	0.471247	0.320614	0.404143	0.342055	0.157045	0.193521	0.449546	0.0693819	0.329061	0.648165	-0.384036	0.184937	-0.127748	-0.399192	3	NA	Homoscedastic & Parametric	4.02616e-14	0.00805379	0.991521	0.84269	0.893355	0.713257	0.687297
HORVU5Hr1G106440.1	-0.401173	-0.40541	-0.339676	-0.263321	-0.147729	-0.154308	-0.159841	-0.0610216	-0.0960863	-0.217942	-0.28062	0.0462769	-0.109804	-0.19474	-0.143453	0.00351397	-0.00390619	-0.0777064	0.24209	0.0287146	-0.049231	0.216988	0.0029017	0.0466065	0.155697	0.290724	0.134407	0.190346	0.197643	0.0676933	0.264168	0.490063	0.059791	0.234566	0.529234	-0.477956	0.0224464	-0.196172	-0.37679	3	NA	Homoscedastic & Parametric	7.25096e-19	0.0062721	0.896836	0.586208	0.500295	0.734596	0.853999
HORVU5Hr1G072420.2	-0.458625	-0.574075	-0.319002	-0.359573	-0.18465	-0.143654	-0.0481739	0.000503477	-0.0994041	-0.199215	-0.31069	0.0574147	-0.121885	-0.254441	-0.171306	0.0121324	0.000694643	-0.200845	0.254451	-0.0239662	-0.0753339	0.311274	0.0295477	0.0577404	0.142841	0.414989	0.0720434	0.12605	0.234893	0.022399	0.259062	0.473766	0.0388671	0.212014	0.611099	-0.418512	0.208974	-0.204747	-0.406309	3	NA	Homoscedastic & Parametric	2.50221e-15	0.0294362	0.938292	0.74497	0.949559	0.64182	0.783836
HORVU4Hr1G056740.5;HORVU5Hr1G100200.3;HORVU5Hr1G100700.3;HORVU4Hr1G056830.1;HORVU6Hr1G085370.2;HORVU6Hr1G085320.3	-0.50488	-0.627314	-0.328809	-0.32741	-0.22844	-0.321434	-0.0566066	-0.0612187	-0.179199	-0.236123	-0.323565	-0.0601136	-0.146873	-0.25367	-0.263632	0.0210799	-0.0217507	-0.191196	0.257948	0.0295828	-0.087073	0.362702	0.0345931	0.101141	0.168076	0.381602	0.120185	0.232809	0.265149	0.0628108	0.211539	0.518898	-0.0366078	0.177146	0.592882	-0.50265	0.10937	-0.144372	-0.429845	3	NA	Homoscedastic & Parametric	3.02592e-15	0.00743334	0.915252	0.553886	0.991684	0.615574	0.777293
HORVU4Hr1G074450.3	-0.504649	-0.380296	-0.348809	-0.324607	-0.169373	-0.252037	-0.0947177	-0.0275199	-0.0608611	-0.231008	-0.284855	0.00348068	-0.00248023	-0.143621	-0.151448	-0.0395222	-0.064452	-0.242432	0.244732	-0.0141331	-0.0376009	0.412667	-0.0404756	0.0388557	-0.0348752	0.321082	0.0458683	0.254866	0.185439	0.0316152	0.153093	0.4837	0.152031	0.281017	0.639432	-0.258275	0.125249	-0.087284	-0.28102	3	NA	Homoscedastic & Non-parametric	2.36031e-18	0.0772074	0.760813	0.506598	0.737484	0.295735	0.817783
HORVU6Hr1G009430.2	-0.403397	-0.389348	-0.255255	-0.158471	-0.131982	-0.134895	-0.201283	-0.0494642	0.0479362	-0.172273	-0.258454	0.0418707	-0.208533	-0.171392	-0.146077	0.0684728	0.0472973	-0.164195	0.319127	0.0289904	0.0418538	0.322977	0.166606	0.00953837	0.182406	0.415732	0.0991067	0.156687	0.21895	0.000231642	0.172575	0.327242	0.191719	0.28386	0.564749	-0.363079	0.199168	-0.410251	-0.34139	3	NA	Homoscedastic & Parametric	1.90972e-17	0.0238255	0.915705	0.533812	0.645362	0.514469	0.808065
HORVU6Hr1G020910.1	-0.352032	-0.475252	-0.211092	-0.305869	-0.0680466	-0.164999	-0.200481	0.016086	-0.0526848	-0.214086	-0.268977	0.0478939	-0.105205	-0.168189	-0.143539	0.0293277	0.0114196	-0.208169	0.290198	0.0125661	-0.176158	0.176224	-0.0202794	-0.0104311	0.198711	0.318706	0.014751	0.169196	0.244089	0.0109388	0.134318	0.391335	-0.00292676	0.314563	0.670745	-0.433137	0.171582	-0.246813	-0.399982	3	NA	Homoscedastic & Non-parametric	1.32796e-17	0.0499338	0.895804	0.388708	0.61857	0.865804	0.934193
HORVU5Hr1G063770.2	-0.389188	-0.337105	-0.311067	-0.307048	-0.100194	-0.0644917	-0.169318	-0.00228117	-0.115691	-0.176337	-0.277204	0.0619656	-0.143487	-0.251222	-0.143815	-0.0103766	0.0240399	-0.117425	0.33466	0.0413264	-0.0617528	0.214565	0.0378015	-0.0730897	0.141156	0.363745	0.0255	0.094732	0.203984	0.0290364	0.0768453	0.399214	0.0993279	0.251687	0.603621	-0.492425	0.0379765	-0.137852	-0.42972	3	NA	Homoscedastic & Parametric	9.82883e-17	0.0341249	0.79755	0.925149	0.682283	0.750827	0.959064
HORVU6Hr1G070560.1	-0.300476	-0.370266	-0.273564	-0.359778	-0.136497	-0.165516	-0.144678	-0.0883771	-0.0246096	-0.151751	-0.236912	0.0738957	-0.0978794	-0.217775	-0.150887	0.0265538	0.0742646	-0.154169	0.275606	0.0302684	-0.0919537	0.134183	0.00149839	-0.0165858	0.202085	0.350956	0.0218048	0.0955763	0.219951	0.0127042	0.0682748	0.29065	0.109789	0.177777	0.439589	-0.258023	0.077353	-0.156388	-0.41755	3	NA	Homoscedastic & Parametric	3.40956e-19	0.00878287	0.773281	0.67469	0.925229	0.858506	0.742777
HORVU4Hr1G035210.3	-0.38737	-0.51833	-0.322597	-0.326891	-0.05419	-0.136114	-0.217564	-0.0656044	-0.059743	-0.258304	-0.270762	0.0257583	-0.281099	-0.264416	-0.165968	0.0579522	0.0421007	-0.123626	0.305825	0.022002	-0.110807	0.0808953	0.0119452	-0.0417453	0.223329	0.347514	-0.016661	0.0621468	0.246632	0.0932065	0.096638	0.353831	0.246323	0.270478	0.677396	-0.366672	0.198191	-0.194229	-0.292153	3	NA	Homoscedastic & Non-parametric	4.17322e-18	0.00825105	0.544507	0.804536	0.499793	0.764666	0.941342
HORVU7Hr1G087050.1	-0.404305	-0.623684	-0.317584	-0.25614	-0.103156	-0.14694	-0.369249	-0.0274195	-0.117688	-0.298496	-0.328581	0.00931437	-0.256909	-0.142718	-0.19844	0.00182238	0.0452122	-0.229575	0.236879	-0.00526409	-0.202019	0.251985	0.025001	-0.0657805	0.124956	0.354154	-0.0754316	-0.0746425	0.303906	0.0904058	0.209607	0.363871	0.0652345	0.278635	0.604191	-0.460209	0.136352	-0.31018	-0.419546	3	NA	Homoscedastic & Parametric	7.88408e-16	0.0505246	0.973785	0.344669	0.710146	0.71759	0.795936
HORVU7Hr1G097860.2	-0.388716	-0.515182	-0.293488	-0.362162	-0.20269	-0.177641	-0.0172132	-0.0331193	0.0334358	-0.0620356	-0.121018	-0.0230162	-0.133038	-0.0648363	-0.205549	-0.0689365	-0.0503171	-0.0521104	0.236562	-0.00108725	0.0558937	0.151225	-0.0303547	-0.0251536	0.135718	0.257137	0.000579809	0.0262205	0.10143	-0.0894054	0.107464	0.332459	0.164852	0.242406	0.572065	-0.338894	0.112918	-0.221791	-0.329922	3	NA	Homoscedastic & Parametric	4.07559e-18	0.0488243	0.676574	0.80193	0.914477	0.909141	0.94365
HORVU2Hr1G109910.6	-0.571341	-0.346606	-0.352357	-0.409589	-0.127129	-0.113078	-0.00967059	-0.0731276	-0.0704623	-0.169729	-0.118491	-0.0375931	-0.102648	-0.230599	-0.163566	-0.000358714	-0.068584	-0.18393	0.227749	-0.0591229	0.044414	0.187433	-0.0118689	-0.00983093	0.1113	0.299039	0.0466133	0.162541	0.17652	0.105241	0.0330482	0.369436	0.147803	0.289507	0.50651	-0.423635	-0.00378316	-0.240278	-0.50255	3	NA	Homoscedastic & Parametric	1.2909e-17	0.0141934	0.804799	0.522966	0.638293	0.748451	0.585614
HORVU5Hr1G070720.1	-0.503723	-0.425309	-0.356625	-0.377641	-0.302211	-0.164708	-0.122902	-0.084044	-0.0597612	-0.1188	-0.202164	-0.00604218	-0.054351	-0.212965	-0.186598	0.0212437	-0.0726095	-0.182431	0.177201	-0.119669	-0.0197054	0.0990262	0.00289363	0.0198494	0.124055	0.250694	0.0357274	0.122677	0.117888	0.0262293	0.228872	0.466942	0.165177	0.272778	0.575821	-0.347759	0.068573	-0.142974	-0.505205	3	NA	Homoscedastic & Parametric	3.50766e-18	0.0312075	0.924592	0.83883	0.854042	0.658193	0.923335
HORVU1Hr1G095100.1	-0.42658	-0.436487	-0.319865	-0.228853	-0.0552562	-0.10128	-0.10766	-0.035836	-0.0324431	-0.167697	-0.192216	0.123877	0.00108944	-0.182583	-0.0432382	-0.0096712	0.0572866	-0.207468	0.279206	-0.0433821	-0.0738293	-0.0333613	0.0601406	0.0773807	0.0879697	0.339402	-0.0618127	0.0159793	0.14874	0.0714057	0.0576206	0.410419	0.113713	0.340992	0.617743	-0.368661	0.103457	-0.110927	-0.344731	3	NA	Homoscedastic & Non-parametric	3.32061e-18	0.170989	0.831105	0.60827	0.64483	0.707542	0.739979
HORVU1Hr1G090760.1;HORVU0Hr1G030130.1	-0.382853	-0.510908	-0.28984	-0.214344	-0.167724	-0.128246	-0.0511869	-0.0575181	-0.0870755	-0.169161	-0.255615	0.010126	0.0337184	-0.184743	-0.197324	-0.00164888	0.012258	-0.386084	0.210717	0.00788856	0.0159787	-0.0468675	0.0574466	0.0857768	0.205973	0.328126	0.0473731	0.177062	0.190114	0.0193554	0.15772	0.353476	-0.0423922	0.193596	0.433561	-0.445612	0.0587711	-0.215164	-0.416561	3	NA	Homoscedastic & Parametric	5.16179e-18	0.0325693	0.696303	0.412055	0.355742	0.832315	0.833163
HORVU5Hr1G084160.2	-0.349027	-0.510164	-0.178987	-0.28153	-0.192661	-0.113808	-0.0690049	-0.0837018	-0.0282631	-0.183643	-0.278993	0.0390303	0.0606052	-0.258785	-0.159974	0.0973993	-0.00628294	-0.165504	0.172443	-0.0540495	0.0739051	0.060732	0.00437805	0.0987797	0.0230734	0.271218	0.0119597	0.0485456	0.0994274	-0.0202174	0.0307249	0.354685	0.0322161	0.18954	0.457817	-0.379547	0.0567966	-0.150092	-0.494955	3	NA	Homoscedastic & Parametric	3.50356e-19	0.125287	0.656991	0.347655	0.340173	0.435699	0.603666
HORVU7Hr1G112930.2	-0.409628	-0.818041	-0.248523	-0.282843	-0.207346	-0.214659	-0.0660378	-0.233043	0.0405672	-0.153202	-0.292688	0.070125	-0.316227	-0.225776	-0.371988	-0.0540094	-0.0454864	-0.315315	0.22786	-0.0166424	-0.0738684	0.289476	0.0704933	0.10917	0.173319	0.284499	-0.105733	0.110162	0.196943	0.0246777	0.206367	0.350222	0.0590188	0.250228	0.632321	-0.366297	0.0750822	-0.153684	-0.377429	3	NA	Homoscedastic & Parametric	1.14212e-15	0.0383307	0.951022	0.344716	0.998915	0.792771	0.839029
HORVU3Hr1G086950.1	-0.466602	-0.580684	-0.294386	-0.320998	-0.0707436	-0.255108	-0.0754296	-0.065146	-0.0672249	-0.104013	-0.171768	0.0278839	-0.197042	-0.239458	-0.276741	-0.11125	-0.0528572	-0.104978	0.291282	-0.0986838	-0.157075	0.199231	-0.0425311	-0.096847	0.143479	0.356486	-0.00921712	0.122876	0.239284	0.0844151	0.309745	0.341166	0.15319	0.299037	0.672824	-0.35505	0.25648	-0.101072	-0.166164	3	NA	Homoscedastic & Non-parametric	1.64906e-17	0.0500836	0.657992	0.596432	0.321627	0.963707	0.758666
HORVU5Hr1G018660.1;HORVU1Hr1G076610.1	-0.478462	-0.503532	-0.406873	-0.278459	-0.0923645	-0.17742	-0.14315	-0.0786147	-0.117491	-0.180098	-0.17773	0.046541	-0.219347	-0.214981	-0.174623	-0.0485595	-0.0223577	-0.172579	0.288308	0.047219	-0.170725	0.0665181	0.0419622	-0.0251659	0.133655	0.262901	0.00848214	0.1281	0.265066	0.0454777	0.285954	0.385966	-0.0281177	0.266211	0.713263	-0.557444	0.0239616	-0.160513	-0.2332	3	NA	Homoscedastic & Non-parametric	8.87264e-18	0.0157835	0.830857	0.847001	0.935336	0.834955	0.800924
HORVU7Hr1G088030.1	-0.582173	-0.357312	-0.419849	-0.348461	0.020717	-0.261022	-0.0775333	-0.0670618	-0.153234	-0.244136	-0.289973	0.0932586	-0.101186	-0.361185	-0.162965	-0.0783572	-0.0751163	-0.102691	0.366405	-0.133014	-0.0744061	0.193302	-0.152393	-0.200821	0.0599453	0.250323	-0.149301	0.00426179	0.150443	-0.00977604	0.347101	0.417532	-0.0266856	0.178921	0.772974	-0.438044	0.110112	-0.0327589	-0.370131	3	NA	Homoscedastic & Non-parametric	8.38606e-16	0.231184	0.864842	0.92826	0.732581	0.678849	0.700147
HORVU3Hr1G092610.1;HORVU3Hr1G092600.1	-0.35561	-0.411237	-0.287943	-0.330194	-0.0858208	-0.186269	-0.0585929	-0.0134871	-0.0187831	-0.214595	-0.277937	0.0844509	-0.0690959	-0.107526	-0.205264	-0.01914	-0.0794207	-0.105014	0.15016	-0.0556953	-0.0949259	-0.134612	0.0429119	0.00041545	0.0455189	0.199263	-0.095493	-9.76e-05	0.00498781	-0.045583	0.242406	0.535201	0.292164	0.381428	0.61335	-0.313047	0.122063	-0.141349	-0.612925	3	NA	Homoscedastic & Non-parametric	1.47846e-19	0.258872	0.982079	0.378842	0.469697	0.922317	0.461128
HORVU2Hr1G021740.1	-0.458797	-0.540427	-0.39517	-0.412588	-0.158816	-0.0876153	-0.285004	0.09648	-0.198577	-0.424813	-0.328699	0.156216	-0.196083	-0.293997	-0.329779	-0.079026	0.0252778	-0.0395077	0.233265	-0.00600383	-0.179034	0.123042	0.0583272	-0.0238779	0.135119	0.262745	-0.0847028	-0.04419	0.264029	0.0808502	0.203446	0.333166	0.243671	0.679803	0.749867	-0.42454	-0.0772698	-0.185927	-0.719063	3	NA	Homoscedastic & Non-parametric	2.79822e-16	0.0441809	0.988341	0.474288	0.400279	0.989329	0.6615
HORVU7Hr1G063970.1	-0.348573	-0.490208	-0.33621	-0.252437	-0.108428	-0.0386763	-0.0304031	-0.070342	-0.0402452	-0.208043	-0.29292	0.267329	-0.0468011	-0.144809	-0.118608	0.12224	0.0312358	-0.305815	0.247653	-0.108267	0.101721	0.152596	-0.0269263	0.0509603	0.135778	0.286111	0.101061	0.102157	0.115876	-6.1e-05	0.209463	0.229108	0.137119	0.2114	0.567076	-0.361518	0.277393	-0.0972176	-0.377733	3	NA	Homoscedastic & Parametric	9.32188e-17	0.220422	0.620647	0.459633	0.838169	0.393085	0.812661
HORVU2Hr1G001600.1	-0.302313	-0.465023	-0.266769	-0.305463	-0.177997	-0.212153	-0.0344224	-0.00278847	0.0657839	-0.27248	-0.238265	0.18775	-0.0456758	-0.0445622	-0.337304	0.050178	0.0466106	-0.138106	0.176555	0.00943125	0.0566504	0.180564	0.018924	0.11968	0.258455	0.38172	0.109559	0.0935931	0.119978	0.0883758	0.22656	0.361257	-0.0231287	0.200691	0.574267	-0.206618	0.257206	-0.0695965	-0.205455	3	X89	Homoscedastic & Parametric	1.51268e-17	0.0638854	0.69792	0.189685	0.742984	0.626207	0.694832
HORVU1Hr1G054380.3	-0.368324	-0.483338	-0.279777	-0.313169	-0.156769	-0.181074	-0.138503	-0.0281772	-0.099268	-0.451424	-0.313815	0.162791	-0.0865981	-0.132311	-0.281327	0.0907335	-0.0020924	-0.223683	0.146256	-0.0340234	-0.0898366	0.199485	-0.0289718	-0.0491352	0.328143	0.311477	0.0622866	0.0459649	0.201267	0.0127215	0.154453	0.319732	0.100458	0.160975	0.672855	-0.347597	0.210099	-0.0851352	-0.298095	3	X89	Homoscedastic & Non-parametric	1.38784e-17	0.0609043	0.436757	0.195585	0.957697	0.463221	0.818078
HORVU4Hr1G050630.4	-0.390842	-0.556409	-0.31483	-0.10785	-0.0278759	-0.246484	-0.131505	0.109479	0.0189048	-0.149548	-0.245546	0.113702	0.0735951	-0.136454	-0.188715	0.0661002	-0.0511948	-0.140874	0.251702	0.0667243	0.0266281	0.305709	-0.137044	0.00292692	0.152309	0.262844	0.00204823	0.0127868	-0.0101712	-0.0483098	0.287392	0.434845	0.0308323	0.0448212	0.559201	-0.274962	0.294514	-0.234513	-0.367799	3	NA	Homoscedastic & Parametric	1.44012e-16	0.374655	0.926959	0.151236	0.691741	0.571305	0.448552
HORVU4Hr1G006500.2	-0.387715	-0.584192	-0.327093	-0.199711	-0.150029	-0.177894	-0.058247	0.0786777	0.0268969	-0.0998813	-0.251331	0.115532	-0.141025	-0.132899	-0.264862	0.0220974	0.0438752	-0.135804	0.202428	-0.115925	-0.0158529	0.227702	-0.121439	0.0228954	0.186707	0.310812	0.0106613	0.173287	0.169429	0.0500677	0.247566	0.282001	-0.0663298	0.100809	0.547604	-0.424931	0.125226	-0.196219	-0.418522	3	NA	Homoscedastic & Parametric	5.8462e-17	0.11142	0.792541	0.329511	0.550868	0.624153	0.743925
HORVU2Hr1G102200.1	-0.491787	-0.811726	-0.37528	-0.235009	-0.106488	-0.106846	-0.0429431	-0.0862153	0.0181523	-0.167678	-0.192141	0.235775	0.0306513	-0.0613575	-0.358523	-0.0152946	0.0468549	-0.234464	0.223334	-0.0279839	-0.0596602	0.0460492	-0.101327	0.0553716	0.222058	0.314884	0.099578	0.0529514	0.146816	-0.0557598	0.267114	0.345598	-0.107181	0.0215915	0.684126	-0.352079	0.147629	-0.155435	-0.348381	3	NA	Homoscedastic & Parametric	5.23064e-15	0.230769	0.546	0.183116	0.547314	0.699644	0.815212
HORVU4Hr1G051720.1	-0.409939	-0.566606	-0.326874	-0.204544	-0.0302226	-0.186483	0.00797956	0.101373	-0.043835	-0.257818	-0.264071	0.177117	-0.139238	-0.0789241	-0.206006	0.126937	-0.0025438	-0.06148	0.153908	0.0243497	0.0625378	0.112745	-0.321298	-0.090717	0.320332	0.262479	-0.00215225	-0.0404821	0.129038	-0.00775841	0.27326	0.389604	-0.0647716	-0.104019	0.620438	-0.409826	0.0704379	-0.146201	-0.425745	3	NA	Homoscedastic & Parametric	2.83948e-15	0.167113	0.931972	0.398282	0.492033	0.895074	0.994274
HORVU4Hr1G043910.1	-0.433643	-0.778386	-0.216882	-0.203358	-0.278495	-0.133526	0.0702242	0.0208513	-0.0138765	-0.192542	-0.269925	0.178753	0.146507	-0.0803791	-0.32485	-0.0605012	-0.117603	-0.291099	0.0767447	-0.11811	0.0461725	0.127787	-0.11053	0.130322	0.263431	0.229783	0.175308	0.197438	0.0535875	-0.114426	0.0629732	0.310366	-0.000639831	0.0904052	0.454285	-0.102494	0.243855	-0.0903822	-0.294353	3	NA	Homoscedastic & Parametric	4.80559e-17	0.267771	0.268869	0.084745	0.864997	0.525602	0.849786
HORVU1Hr1G000080.2	-0.285683	-0.707283	-0.207549	-0.41411	-0.389686	-0.124592	-0.123179	-0.0607614	0.00712157	-0.288061	-0.397534	0.0913629	0.135004	-0.171007	-0.307547	-0.0383463	-0.108392	-0.381709	0.0756988	-0.0523798	0.0275254	0.151336	-0.0450696	0.13907	0.257027	0.265839	0.186194	0.157653	0.0894403	-0.0320617	0.0953933	0.381033	0.169224	0.281406	0.545102	-0.0605939	0.273363	-0.138856	-0.506425	3	NA	Homoscedastic & Parametric	2.52005e-16	0.0678945	0.477494	0.129872	0.899951	0.777322	0.971706
HORVU1Hr1G055440.1	-0.52464	-1.00667	-0.287337	-0.338588	-0.361074	-0.177873	-0.059557	-0.0489394	-0.241878	-0.431757	-0.517094	0.17842	0.199864	-0.0663425	-0.348344	-0.0736982	-0.0186189	-0.172677	0.107648	-0.0463484	0.111892	0.217407	-0.116496	0.220246	0.432723	0.353959	0.244124	0.169022	0.157566	0.0963053	0.313467	0.466747	0.284668	0.398374	0.728587	-0.10486	-0.0174432	-0.334479	-0.713129	3	X48	Homoscedastic & Parametric	1.73292e-15	0.0537213	0.0899518	0.0367981	0.171293	0.422218	0.68148
HORVU7Hr1G069460.4	-0.576159	-0.824685	-0.356413	-0.353945	-0.375977	-0.23179	-0.0931735	-0.19099	-0.178003	-0.262033	-0.446285	0.184336	0.201183	-0.128189	-0.43063	-0.138495	-0.0928493	-0.22719	0.00662519	-0.204356	0.036375	0.123712	-0.197527	0.213345	0.433127	0.265195	0.171133	0.0573496	0.0537035	-0.189527	0.103157	0.377115	0.402407	0.409524	0.710693	-0.248299	0.0375397	-0.319773	-0.53075	3	X48	Homoscedastic & Parametric	2.27689e-15	0.104313	0.126356	0.0527673	0.262131	0.581229	0.967465
HORVU7Hr1G033900.2	-0.465065	-0.805707	-0.44525	-0.490703	-0.491275	-0.273709	-0.11357	-0.216135	-0.219702	-0.354952	-0.57359	0.188413	0.145816	-0.161418	-0.532884	-0.149341	-0.070889	-0.236358	0.0512961	-0.263142	0.0276671	0.169473	-0.146037	0.220735	0.281412	0.275777	0.208403	0.0914094	0.0676362	-0.0601856	0.26152	0.423137	0.254314	0.398812	0.58065	-0.215206	-0.00887524	-0.210108	-0.667458	3	X48	Homoscedastic & Parametric	7.36279e-16	0.0616833	0.14035	0.0441655	0.386531	0.429091	0.683689
HORVU2Hr1G121990.8	-0.490088	-0.597795	-0.305238	-0.311961	-0.243195	-0.131792	0.0480727	0.0251267	0.0329114	-0.150984	-0.364445	0.251407	0.206136	-0.116422	-0.194922	0.0387151	0.00509269	-0.203724	0.18006	-0.138758	0.0969104	0.335889	-0.0267289	0.234758	0.332891	0.413476	0.202908	0.17397	0.154502	0.0365999	0.199804	0.261916	0.0175778	0.169723	0.570423	-0.274749	0.0941861	-0.156156	-0.489479	3	X185	Homoscedastic & Parametric	1.1212e-15	0.126693	0.414663	0.1882	0.315392	0.427014	0.888056
HORVU7Hr1G084630.4	-0.596753	-0.564378	-0.453313	-0.295851	-0.259451	-0.246175	-0.0355327	-0.00997362	0.069098	-0.0672679	-0.346888	0.183897	0.159976	-0.0440972	-0.22142	-0.163975	-0.0521585	-0.260001	0.113727	-0.237222	-0.0563684	0.167976	0.0469629	0.185975	0.253703	0.327662	0.108263	0.0182161	0.0500401	-0.16319	0.253206	0.300036	0.10964	0.241156	0.583896	-0.214654	0.0756765	-0.106399	-0.438186	3	X185	Homoscedastic & Parametric	6.94942e-16	0.248309	0.541226	0.167299	0.543472	0.715282	0.822284
HORVU1Hr1G047680.2	-0.411031	-0.301407	-0.362287	-0.214944	-0.221582	-0.183452	-0.113018	0.0928981	-0.113911	-0.277767	-0.404144	0.125601	0.237859	-0.259646	-0.0965925	0.010754	-0.0472779	-0.105763	0.155034	0.00860489	0.0160197	0.160347	0.0415315	0.21244	0.211656	0.293667	0.01582	0.0536127	0.0916504	-0.0286367	0.145259	0.445733	0.0686099	0.254376	0.58806	-0.293648	0.196579	-0.174137	-0.368073	3	NA	Homoscedastic & Parametric	6.2212e-17	0.116975	0.436498	0.289343	0.618703	0.632666	0.860609
HORVU1Hr1G091730.19	-0.516654	-0.423792	-0.435774	-0.421216	-0.397396	-0.238073	-0.233434	0.0615559	-0.0616893	-0.211245	-0.325955	0.160075	0.199197	-0.135724	-0.155118	0.0431665	-0.000642756	-0.184402	0.102635	-0.018967	-0.0312984	0.25341	0.0535121	0.222067	0.246324	0.383552	0.207329	0.123015	0.0359933	-0.101439	0.175196	0.241608	0.170286	0.396548	0.761148	-0.299088	0.104609	-0.0340554	-0.337047	3	X66	Homoscedastic & Non-parametric	1.65416e-16	0.0673661	0.402495	0.191005	0.834734	0.439327	0.873957
HORVU2Hr1G042280.3	-0.652839	-0.593209	-0.488901	-0.392906	-0.403493	-0.226124	-0.144753	0.0411479	-0.190081	-0.36882	-0.517394	0.267335	0.130845	-0.193603	-0.111415	-0.0375206	-0.0155231	-0.20485	0.12187	-0.0492713	-0.0086201	0.189762	-0.0552224	0.11247	0.214955	0.305355	0.155123	0.0806513	0.0129126	-0.206927	0.19498	0.390507	0.279789	0.400929	0.635829	-0.259143	0.0209647	-0.175346	-0.523219	3	X66	Homoscedastic & Parametric	6.72723e-16	0.124575	0.19381	0.175439	0.442118	0.302668	0.937486
HORVU1Hr1G059860.2	-0.45676	-0.444277	-0.375788	-0.208029	-0.20101	-0.136641	-0.0691494	-0.0702333	-0.0145352	-0.133786	-0.301946	0.201161	0.0533403	-0.257161	-0.132215	-0.0971028	-0.110148	-0.114075	0.193718	-0.20811	-0.00484281	0.10617	-0.244908	0.0210057	0.246676	0.277954	0.0471998	-0.0543798	0.0166189	-0.170842	0.309433	0.514035	0.379721	0.39879	1.00686	-0.239679	0.0921435	-0.189733	-0.465231	3	NA	Homoscedastic & Non-parametric	3.16931e-16	0.316803	0.618332	0.411723	0.544227	0.707907	0.884968
HORVU6Hr1G001700.1	-0.334672	-0.445176	-0.216543	-0.220237	-0.140405	-0.0735546	0.0213935	-0.0524688	0.0304277	-0.173124	-0.258866	0.160483	0.0748028	-0.139712	-0.147746	0.00427808	-0.0323551	-0.12812	0.271626	-0.0950317	0.020717	0.128497	-0.00872781	0.0744407	0.195516	0.250933	0.00214097	0.057899	0.0960839	0.00412341	0.314239	0.417655	0.134852	0.23188	0.619879	-0.136624	0.272748	-0.0604566	-0.241288	3	X130	Homoscedastic & Parametric	3.11852e-18	0.278366	0.546607	0.33739	0.788764	0.537828	0.584538
HORVU2Hr1G041770.2;HORVU2Hr1G041760.1	-0.449495	-0.510363	-0.346484	-0.328481	-0.304654	-0.204009	-0.010613	-0.0685861	-0.0790729	-0.284925	-0.38276	0.0789316	0.0111035	-0.190023	-0.202191	-0.0154379	-0.056982	-0.264137	0.133531	-0.0917578	-0.0525118	0.152337	-0.0415378	0.0248296	0.14016	0.256063	-0.0209912	-0.00983422	-0.0699709	-0.257804	0.252966	0.40669	0.131357	0.277854	0.666154	-0.140645	0.269556	-0.00643885	-0.295672	3	X130	Homoscedastic & Non-parametric	5.13567e-18	0.214572	0.454612	0.349596	0.337117	0.331649	0.851661
HORVU5Hr1G100910.1	-0.432302	-0.606339	-0.362575	-0.215005	-0.143325	-0.0563533	-0.128322	-0.0593243	-0.00567298	-0.246875	-0.252802	0.0704915	-0.0337262	-0.159318	-0.221818	-0.045298	0.00765336	-0.0988635	0.175966	-0.0611857	-0.0574354	0.181488	-0.164955	0.0524155	0.153229	0.337606	0.0731217	0.0829004	0.196772	-0.0129151	0.284045	0.416455	0.111318	0.207762	0.581779	-0.251768	0.169308	-0.173044	-0.425967	3	NA	Homoscedastic & Parametric	1.85489e-17	0.0553237	0.756809	0.381672	0.866597	0.649669	0.900484
HORVU2Hr1G086240.1	-0.420292	-0.504239	-0.312696	-0.261804	-0.209413	-0.192408	-0.135511	-0.0348781	-0.0300241	-0.271519	-0.276874	0.0521843	-0.0745979	-0.126198	-0.132846	0.060315	0.021052	-0.0860265	0.22122	-0.0151678	-0.084701	0.202372	0.0188547	0.0369795	0.160617	0.302214	0.0136967	-0.0149503	0.0680244	-0.126141	0.18964	0.412752	0.0393497	0.199765	0.617011	-0.358063	0.206458	-0.158329	-0.357077	3	NA	Homoscedastic & Parametric	3.37511e-17	0.0975102	0.703928	0.414994	0.944517	0.478658	0.849112
HORVU5Hr1G097020.5	-0.521941	-0.428045	-0.379141	-0.263759	-0.21011	-0.231405	-0.0305103	-0.0295807	0.00242893	-0.168376	-0.340676	0.0809858	0.0571506	-0.000790305	-0.219902	-0.0304962	-0.0238877	-0.134359	0.105255	-0.042309	0.0422692	0.1877	-0.0675867	0.139133	0.12387	0.242754	0.000519638	-0.0205147	0.152118	-0.0406537	0.210556	0.468606	0.094335	0.265341	0.718893	-0.170132	0.165689	-0.128527	-0.449914	3	NA	Homoscedastic & Non-parametric	6.27497e-18	0.154765	0.463424	0.185308	0.74423	0.581467	0.632818
HORVU7Hr1G075790.10	-0.369553	-0.519362	-0.320184	-0.272565	-0.159784	-0.167554	-0.0800748	-0.0975833	-0.0861566	-0.267135	-0.329307	0.0488939	-0.00157527	-0.159914	-0.179596	0.0360693	-0.0331345	-0.150978	0.140323	-0.0360706	-0.0128151	0.0330307	-0.12839	0.0787842	0.174881	0.172561	-0.0162722	-0.0159479	0.0232462	-0.0111162	0.29142	0.615051	0.15776	0.343689	0.707518	-0.237056	0.0889105	-0.122317	-0.469636	3	NA	Homoscedastic & Non-parametric	1.23979e-19	0.0790019	0.560943	0.262323	0.726044	0.6913	0.721188
HORVU1Hr1G028190.1	-0.395312	-0.484919	-0.244185	-0.18274	-0.108346	-0.141011	-0.0668555	-0.0192767	-0.0621054	-0.168262	-0.303107	0.0644948	0.0850025	-0.150164	-0.205111	-0.0175273	-0.142829	-0.108639	0.13206	-0.00184742	0.0100015	0.133802	-0.00310591	0.0745959	0.186062	0.169846	0.0642466	-0.0433145	0.067703	-0.0736265	0.23873	0.342253	0.00293207	0.174752	0.504349	-0.201708	0.162447	-0.253252	-0.397034	3	NA	Homoscedastic & Parametric	1.68865e-19	0.10434	0.526934	0.155408	0.480612	0.976892	0.710621
HORVU4Hr1G040280.4	-0.449298	-0.553716	-0.342204	-0.34598	-0.339842	-0.234742	-0.123023	-0.114836	-0.0416924	-0.229153	-0.293094	0.119799	0.0738343	-0.128095	-0.140919	-0.0489393	-0.0516047	-0.198667	0.140191	-0.0967445	-0.000182055	0.0734437	-0.0495014	0.0665731	0.23406	0.309769	0.128609	0.0687155	0.101404	-0.0557883	0.180008	0.457174	0.158525	0.190001	0.634212	-0.26203	0.0381904	-0.273479	-0.527787	3	NA	Homoscedastic & Parametric	3.6273e-17	0.0833344	0.362256	0.247904	0.335837	0.580714	0.950534
HORVU1Hr1G038680.8	-0.473121	-0.701601	-0.265576	-0.264928	-0.292199	-0.264306	-0.0869022	-0.0449775	-0.107879	-0.250344	-0.388175	0.0816042	0.0664483	-0.140219	-0.316667	-0.0188	-0.147007	-0.123405	0.0937617	-0.081371	0.0328159	0.0661127	-0.143167	0.0809224	0.257397	0.19759	0.112822	0.0694044	0.0414942	-0.111893	0.302698	0.448433	0.125342	0.162383	0.6502	-0.281203	0.00734283	-0.336908	-0.599826	3	NA	Homoscedastic & Parametric	1.39587e-17	0.105691	0.297467	0.0666445	0.161135	0.675995	0.642797
HORVU1Hr1G057970.2	-0.648098	-0.713454	-0.462007	-0.318119	-0.417087	-0.269641	-0.171427	-0.153291	-0.309384	-0.525714	-0.655417	0.350714	0.0993436	-0.124729	-0.346005	0.00663768	0.0239377	-0.100592	0.0635067	-0.0420561	0.145423	0.234678	-0.238576	0.177485	0.610711	0.399003	0.362249	0.022284	0.0642821	-0.0817736	0.773888	0.62154	0.552889	0.588878	0.953846	-0.204975	-0.0279698	-0.258698	-0.799659	3	NA	Homoscedastic & Non-parametric	9.90869e-15	0.0439842	0.0310799	0.0250078	0.152446	0.173151	0.512179
HORVU2Hr1G019410.4	-0.422034	-0.456081	-0.319445	-0.31228	-0.296896	-0.207716	-0.0460018	-0.0371893	-0.159491	-0.211256	-0.400662	0.0986466	-0.024289	-0.141927	-0.213011	-0.0437037	-0.00947643	-0.0512613	0.0652866	-0.0991766	0.010941	0.303846	-0.0356163	0.175041	0.218626	0.201565	0.0472444	-0.0272969	0.0313369	-0.00751454	0.446032	0.365406	0.167389	0.178699	0.528879	-0.188772	0.0989984	-0.20136	-0.522952	3	NA	Homoscedastic & Parametric	1.58422e-18	0.0456179	0.431963	0.272211	0.634707	0.513127	0.851796
HORVU6Hr1G017500.1	-0.444422	-0.526136	-0.229711	-0.17717	-0.173304	-0.131604	-0.0852633	0.0110281	0.00843119	-0.23182	-0.303413	0.0622474	0.0750789	-0.0761797	-0.164197	-0.0814653	-0.0282597	-0.139655	0.0503813	-0.0646623	-0.0179684	0.046344	-0.0078881	0.127326	0.159564	0.186976	-0.00394931	-0.0523409	0.0156481	-0.0159502	0.495384	0.287923	0.022761	0.257259	0.457389	-0.155585	0.123602	-0.221006	-0.428917	3	NA	Homoscedastic & Parametric	1.41062e-19	0.246305	0.376129	0.11817	0.400928	0.696182	0.565053
HORVU4Hr1G033170.1	-0.546054	-0.582	-0.340824	-0.351716	-0.302147	-0.204496	-0.0629495	-0.132569	-0.193684	-0.235008	-0.383505	0.0474345	-0.0104516	-0.163186	-0.199281	-0.0951468	-0.0948985	-0.200651	0.150311	-0.0608554	-0.0496281	0.160443	-0.0768586	0.0863065	0.287583	0.370241	-0.0749535	0.00319602	-0.0106538	0.0603273	0.0038646	0.521236	0.291698	0.337249	0.631176	-0.407655	-0.0420509	-0.02267	-0.408156	3	NA	Homoscedastic & Non-parametric	1.7018e-17	0.0911324	0.314473	0.312485	0.672058	0.353763	0.694512
HORVU4Hr1G003120.1	-0.426115	-0.525323	-0.417806	-0.363456	-0.187759	-0.140494	-0.090102	-0.00959355	-0.0278625	-0.23876	-0.332423	0.052163	0.119298	-0.223262	-0.0714621	0.0729289	0.0377366	0.03555	0.300859	0.0169331	0.22064	0.30732	-0.0121736	0.166693	0.436868	0.266681	0.066758	0.0989644	0.0531482	0.0270773	0.0100467	0.11602	0.0758654	0.107497	0.44146	-0.29989	0.0649846	-0.433928	-0.393118	3	NA	Homoscedastic & Parametric	1.10589e-16	0.0107605	0.876624	0.583046	0.469623	0.888635	0.889444
HORVU2Hr1G070000.3	-0.343746	-0.447617	-0.210533	-0.232733	-0.128051	-0.132029	-0.0985783	0.068533	0.0139191	-0.274054	-0.393128	0.188231	0.156247	-0.0114963	-0.177616	0.0124143	0.00723845	-0.220871	0.171415	-0.1086	0.0417923	0.0981182	-0.171279	0.0972781	0.259383	0.307616	0.162613	0.0482497	-0.0100124	-0.0538287	0.0789805	0.358116	0.0881618	0.180263	0.600961	-0.225695	0.0866708	-0.39499	-0.598699	3	NA	Homoscedastic & Parametric	2.6121e-17	0.407216	0.371856	0.0834254	0.0803333	0.473782	0.616683
HORVU7Hr1G038520.6	-0.277597	-0.339241	-0.401336	-0.210666	-0.120433	-0.119004	-0.106418	-0.118957	-0.0372756	-0.194685	-0.359905	0.139995	0.0986652	-0.143067	-0.169063	0.0125216	0.0212947	-0.114471	0.18366	-0.07543	0.0669036	0.13615	-0.0701231	0.205619	0.285461	0.32616	0.211209	0.0013295	0.0570618	-0.0613742	0.257374	0.155194	0.0467533	0.102496	0.455572	-0.418518	-0.0752453	-0.363204	-0.566112	3	NA	Homoscedastic & Parametric	4.19483e-19	0.0209809	0.58572	0.255007	0.0410774	0.927533	0.818263
HORVU7Hr1G082910.2	-0.288789	-0.467569	-0.386866	-0.404451	-0.26514	-0.188653	-0.129002	0.0440584	0.115361	-0.142665	-0.237326	-0.00055974	0.0677705	-0.0816228	-0.223533	0.101642	0.0632045	-0.101896	0.299377	-0.0230727	-0.0713056	0.198625	0.00211487	0.0583462	0.517154	0.461351	0.175749	0.166095	0.220408	0.100347	0.157146	0.234982	-0.0954122	0.131945	0.553655	-0.338306	0.0233158	-0.367017	-0.442201	3	NA	Homoscedastic & Parametric	2.10088e-15	0.00821832	0.721367	0.508672	0.438863	0.816995	0.665917
HORVU3Hr1G094050.3	-0.256921	-0.445881	-0.235041	-0.288636	-0.225009	-0.102478	-0.133236	-0.00587751	-0.0598584	-0.1835	-0.153251	0.0433184	-0.0675141	-0.209958	-0.141575	0.203482	0.135538	-0.102429	0.149097	0.112335	0.0982819	0.191012	0.124122	0.184247	0.333552	0.467181	0.14978	0.0889454	0.277262	0.123032	0.0164746	0.303778	0.0584831	0.181597	0.562457	-0.254115	0.202468	-0.213058	-0.460405	3	NA	Homoscedastic & Parametric	1.56782e-17	0.00150001	0.977068	0.716945	0.91023	0.95699	0.477081
HORVU5Hr1G092920.6	-0.379618	-0.726703	-0.266402	-0.263536	-0.192651	-0.17206	-0.276274	-0.0641146	-0.035395	-0.321098	-0.327692	0.154925	-0.0241555	-0.0640722	-0.394439	0.156331	0.0764015	-0.147979	0.167033	0.0928273	0.0260328	0.308409	0.0738902	0.198649	0.41836	0.459199	0.168238	0.132969	0.29831	0.0567416	-0.0291115	0.270986	-0.0131947	0.192217	0.495959	-0.315203	0.166784	-0.310039	-0.464094	3	NA	Homoscedastic & Parametric	4.17384e-17	0.00552675	0.397271	0.0422271	0.355726	0.57826	0.894999
HORVU7Hr1G087240.2	-0.421792	-0.471136	-0.196049	-0.321063	-0.372284	-0.114236	-0.113644	-0.143814	-0.0633985	-0.36205	-0.467459	0.148779	0.060054	-0.0548092	-0.173763	0.136164	-0.0164072	-0.260018	0.201838	0.00600207	-0.048029	0.282553	0.102129	0.185179	0.290888	0.391108	0.117367	0.0756694	0.204437	-0.0186779	-0.0208194	0.299547	-0.0773193	0.0937333	0.465526	-0.355501	0.0237439	-0.252603	-0.538365	3	NA	Homoscedastic & Parametric	1.97148e-17	0.0466382	0.120093	0.13191	0.14096	0.219864	0.97227
HORVU6Hr1G068410.1	-0.35054	-0.337436	-0.225445	-0.326893	-0.251644	-0.215052	-0.103933	-0.170097	0.0899095	-0.199604	-0.187196	0.0600311	-0.108878	-0.047424	-0.220107	-0.00555178	0.0873745	0.104062	0.351688	0.163208	0.101471	0.31313	0.11334	0.148174	0.215338	0.466667	0.200174	0.171798	0.351937	0.198988	0.0477152	0.313356	-0.00530768	0.245751	0.617988	-0.492366	-0.0443277	-0.254383	-0.548797	3	NA	Homoscedastic & Parametric	4.64293e-17	0.00358917	0.717257	0.492478	0.164254	0.804288	0.843868
HORVU6Hr1G022220.1	-0.376072	-0.385063	-0.23846	-0.279566	-0.136692	-0.151552	-0.0529475	-0.00650492	0.00657554	-0.154551	-0.374093	-0.00730554	-0.125261	-0.167416	-0.114782	0.0697239	0.0968969	-0.0775376	0.313117	0.074685	0.00983887	0.130434	0.0425262	0.0639774	0.212164	0.387147	0.118394	0.0986405	0.293453	0.0772874	0.0231809	0.197467	0.0523145	0.146274	0.356657	-0.458983	-0.013901	-0.33014	-0.719221	3	X281	Homoscedastic & Parametric	5.98639e-19	0.0020274	0.748829	0.650413	0.106437	0.861618	0.766576
HORVU3Hr1G014730.2	-0.25762	-0.609697	-0.128413	-0.219506	-0.10181	-0.0356916	-0.172112	-0.156321	-0.0509988	-0.315709	-0.261491	0.09472	-0.229767	-0.111208	-0.181695	0.154838	0.00155818	-0.0811576	0.273639	0.187736	0.0556492	0.356591	0.0917692	0.129247	0.166119	0.391174	0.143674	0.102686	0.295635	0.0779459	-0.0881406	0.393322	-0.146066	0.190268	0.495655	-0.54901	-0.0869527	-0.314905	-0.502946	3	NA	Homoscedastic & Parametric	3.40125e-17	0.00963769	0.634235	0.326052	0.096934	0.613587	0.980311
HORVU6Hr1G076310.2	-0.161941	-0.613485	-0.248277	-0.258436	-0.195862	-0.13934	-0.128758	-0.14378	-0.0780329	-0.285757	-0.301698	0.138201	-0.0456533	-0.0874933	-0.386643	-0.0104614	0.215444	0.0684017	0.119488	-0.0721107	0.0780203	0.151515	-0.00971743	0.216739	0.298416	0.29422	0.216878	0.0823029	0.207341	0.246051	0.189078	0.151273	0.174363	0.253515	0.699669	-0.395084	0.0953494	-0.358856	-0.525002	3	NA	Homoscedastic & Parametric	2.85932e-17	0.0182785	0.528172	0.11295	0.18623	0.803563	0.535111
HORVU7Hr1G061850.1	-0.348344	-0.502134	-0.316323	-0.242884	-0.168345	-0.157171	-0.0284169	-0.123757	-0.0602533	-0.203521	-0.250437	0.0409522	-0.0408	-0.142319	-0.240752	0.0372393	0.0252966	0.171083	0.246227	0.0399147	0.039774	0.212581	-0.0202951	0.0262725	0.22668	0.28379	0.0962586	0.0219436	0.114902	-0.00257154	-0.0564524	0.338193	0.0906652	0.216628	0.440629	-0.369752	0.14358	-0.177305	-0.448975	3	NA	Homoscedastic & Parametric	1.05542e-18	0.0219921	0.692824	0.404784	0.607167	0.675868	0.617514
HORVU1Hr1G082660.1	-0.216573	-0.552179	-0.254247	-0.326614	-0.203108	-0.205382	-0.19933	0.00107793	-0.0358524	-0.20707	-0.335413	0.0941919	-0.0301701	-0.144029	-0.235663	0.0414952	0.00517684	0.0689683	0.28141	0.00800128	0.0283649	0.262664	-0.0512946	0.128371	0.189791	0.349889	0.099439	0.136603	0.24757	0.0591824	0.0690259	0.226737	0.0592992	0.203901	0.54908	-0.400032	0.0535756	-0.316904	-0.558171	3	NA	Homoscedastic & Parametric	3.15326e-18	0.0148761	0.964559	0.1466	0.199655	0.805014	0.527613
HORVU3Hr1G075180.1	-0.258895	-0.673219	-0.38511	-0.206487	-0.066109	-0.145895	-0.186652	0.000219261	0.0160273	-0.229733	-0.112292	-0.053565	-0.017611	-0.105452	-0.332042	0.14217	0.0729987	0.0418885	0.233878	-0.0271157	0.119557	0.15352	0.0149819	0.0144971	0.159727	0.363185	0.0438864	0.0724967	0.249725	0.0819973	0.0456155	0.198671	0.0643543	0.198708	0.533065	-0.465736	0.00723023	-0.288657	-0.482985	3	NA	Homoscedastic & Parametric	2.4931e-18	0.0243517	0.68342	0.273114	0.243553	0.782889	0.398908
HORVU6Hr1G055840.9	-0.369396	-0.381075	-0.269109	-0.0471436	-0.087663	0.0114609	-0.119098	0.00911307	-0.109432	-0.233641	-0.302281	0.12176	-0.0988958	-0.277398	-0.14249	0.0190377	0.0627631	-0.0151631	0.262631	0.0548568	0.111883	0.524548	0.16015	0.148882	0.178243	0.387745	0.144269	0.128111	0.206425	0.109724	0.122451	0.466909	0.00247786	0.200106	0.596068	-0.461295	-0.0734096	-0.297274	-0.585932	3	NA	Homoscedastic & Parametric	1.11373e-16	0.0351478	0.721917	0.572955	0.114428	0.385216	0.782966
HORVU5Hr1G013240.1;HORVU5Hr1G013250.1	-0.310902	-0.435969	-0.262599	-0.171559	-0.153959	-0.0249109	-0.195206	-0.0506017	-0.105815	-0.302304	-0.310172	-0.00662016	-0.108424	-0.204302	-0.125557	0.104003	-0.0247237	-0.0558541	0.208706	0.055993	-0.0273316	0.231901	0.100752	0.114095	0.279661	0.359261	0.00946303	-0.00559157	0.135096	0.0436052	0.127271	0.358427	0.0100469	0.133555	0.497609	-0.320361	0.0692677	-0.313071	-0.477331	3	NA	Homoscedastic & Parametric	1.49853e-18	0.00999771	0.765512	0.570907	0.415833	0.721147	0.925858
HORVU1Hr1G071590.1	-0.366653	-0.350851	-0.343904	-0.258349	-0.175229	-0.0522812	0.0458105	0.0750085	-0.0454213	-0.194089	-0.235921	0.049128	0.0392841	-0.212366	-0.102686	0.0917017	0.0125458	-0.0548367	0.310077	-0.128728	-0.00888172	0.22122	0.00194124	0.0777298	0.235339	0.325417	-0.0235156	0.0706205	0.116782	0.0362202	0.147873	0.393101	-0.0365719	0.133167	0.641725	-0.35397	0.0352079	-0.298541	-0.456979	3	NA	Homoscedastic & Non-parametric	8.52306e-18	0.0975909	0.981696	0.974009	0.335012	0.636759	0.990162
HORVU1Hr1G081770.1	-0.3562	-0.207502	-0.290796	-0.266122	-0.22865	-0.123939	-0.0572688	-0.0909587	-0.175342	-0.27392	-0.306576	0.0945267	-0.0761135	-0.229552	-0.130801	0.0236755	0.0256447	-0.192389	0.275891	-0.0203044	0.130363	0.16382	0.0857911	0.118352	0.121124	0.339751	0.0582469	0.130341	0.132008	0.112386	0.141704	0.354611	-0.00350393	0.300134	0.528152	-0.263287	0.0128206	-0.194434	-0.629619	3	NA	Homoscedastic & Parametric	2.02426e-18	0.0301036	0.502758	0.881244	0.391782	0.358866	0.872717
HORVU1Hr1G083710.2	-0.352405	-0.530544	-0.395809	-0.350005	-0.228739	-0.253541	-0.136618	-0.0228078	-0.136709	-0.281978	-0.425847	0.156748	0.0310232	-0.193235	-0.131813	0.0920475	0.0500776	-0.0908733	0.371884	0.043259	0.127716	0.109076	0.0858447	0.110105	0.327728	0.389568	0.185963	0.210127	0.21326	0.0677946	0.140743	0.443228	0.126756	0.218022	0.550962	-0.549704	-0.0556679	-0.281874	-0.680872	3	NA	Homoscedastic & Parametric	8.90066e-17	0.00866101	0.610976	0.254679	0.108684	0.738944	0.681424
HORVU5Hr1G027910.15	-0.404709	-0.475686	-0.40002	-0.369807	-0.260999	-0.216309	-0.0343904	-0.0936616	-0.165778	-0.238911	-0.365507	0.0145281	-0.0846777	-0.29279	-0.168173	0.119746	0.0767039	-0.101356	0.236959	0.0229111	0.092901	0.230358	0.0702297	0.0860199	0.188765	0.407655	0.059311	0.152801	0.162196	0.127777	0.214217	0.270673	0.0431885	0.208237	0.606555	-0.463286	-0.0267756	-0.331031	-0.460894	3	NA	Homoscedastic & Parametric	1.32671e-17	0.00416006	0.919879	0.822672	0.477268	0.411691	0.967612
HORVU6Hr1G059290.1	-0.345486	-0.437742	-0.321014	-0.380221	-0.206613	-0.101321	-0.09999	-0.074551	-0.12384	-0.274067	-0.310562	0.0569752	-0.054276	-0.249814	-0.0976772	0.0121084	0.0113878	-0.0842831	0.219411	0.00826071	0.0861024	0.165664	0.0351102	0.18737	0.164019	0.33142	0.0728209	-0.0240419	0.0792903	0.0380953	0.268408	0.379256	0.0386288	0.152912	0.610346	-0.423366	-0.0081239	-0.327046	-0.574351	3	NA	Homoscedastic & Parametric	1.55861e-17	0.0118988	0.85711	0.849307	0.299313	0.888399	0.86992
HORVU1Hr1G088760.2	-0.43621	-0.383055	-0.32957	-0.212028	-0.126207	-0.055722	-0.212403	0.0401395	-0.0388997	-0.183184	-0.253293	0.143685	0.110717	-0.206578	-0.0301183	0.0494408	0.0339328	-0.113645	0.230627	-0.0553216	0.0127163	0.196642	0.102557	0.141301	0.130133	0.34659	0.118059	0.0791809	0.0732077	0.0125072	0.0833477	0.24065	0.108228	0.289947	0.448687	-0.334555	0.0800509	-0.204967	-0.495085	3	NA	Homoscedastic & Parametric	1.00941e-18	0.101955	0.623798	0.395777	0.257271	0.413497	0.699764
HORVU7Hr1G055560.1	-0.48718	-0.469581	-0.274613	-0.193975	-0.0721582	-0.139385	-0.179525	0.00124341	-0.220026	-0.22848	-0.467058	0.134358	0.119993	-0.145455	-0.180388	0.0185989	0.0525919	-0.167225	0.302361	-0.0256223	0.0038104	0.215664	0.0091011	0.13785	0.157685	0.353079	0.10972	0.197586	0.18674	0.0616912	-0.0720809	0.152576	0.00992154	0.252198	0.540287	-0.335683	0.0373234	-0.192318	-0.447794	3	NA	Homoscedastic & Parametric	1.59998e-17	0.118721	0.299478	0.0957692	0.231043	0.261001	0.440322
HORVU2Hr1G106810.1	-0.452954	-0.240112	-0.323373	-0.277522	-0.168922	-0.205957	-0.157033	-0.0787329	-0.0917497	-0.267686	-0.371932	0.162365	-0.0320273	-0.260082	-0.198949	-0.0175495	-0.089265	0.087378	0.112831	-0.00876761	-0.0711491	0.165329	0.0817721	0.0865104	0.124284	0.269074	0.0312672	-0.00246593	0.088391	-0.0444859	0.0576624	0.158374	-0.0111538	0.224922	0.467325	-0.314598	0.0807583	-0.163402	-0.573864	3	NA	Homoscedastic & Parametric	1.04093e-18	0.054317	0.518085	0.377382	0.450306	0.614966	0.68572
HORVU6Hr1G072320.1	-0.257469	-0.519483	-0.235445	-0.124006	-0.0294888	-0.116263	-0.181638	-0.104319	-0.115178	-0.231748	-0.269222	0.0879359	-0.00640032	-0.208774	-0.188041	0.0538122	0.0658731	-0.0511198	0.20866	-0.0494538	0.0300572	0.150701	0.0522694	0.24	0.0772757	0.127665	-0.00678672	0.0407399	0.00656578	0.0149539	0.100831	0.235739	-0.0656686	0.248663	0.574914	-0.429709	0.0369622	-0.287255	-0.61228	3	X1024	Homoscedastic & Parametric	7.31277e-19	0.145906	0.624916	0.170346	0.089125	0.563518	0.341659
HORVU1Hr1G003330.2	-0.281793	-0.627401	-0.013018	-0.266025	-0.225998	-0.206723	-0.120748	-0.149944	-0.112989	-0.405784	-0.422128	0.175893	-0.130907	-0.276444	-0.33189	0.0645627	0.0410812	-0.183484	0.236627	-0.0715398	0.095304	-0.0635037	0.182696	0.271755	0.336744	0.546351	0.190019	0.118659	0.367998	0.236383	0.0155175	0.407919	0.158183	0.24114	0.636901	-0.399529	0.0495574	-0.370648	-0.615142	3	NA	Homoscedastic & Parametric	4.10265e-15	0.0184583	0.361348	0.13508	0.188037	0.813282	0.648845
HORVU7Hr1G055990.1	-0.341793	-0.455868	-0.286887	-0.421481	-0.120831	-0.295835	-0.256705	-0.0660039	-0.104425	-0.15992	-0.510417	-0.00280156	-0.0679586	-0.24029	-0.329429	0.0522947	0.00019983	-0.133499	0.283742	-0.0723612	-0.0199996	0.128356	-0.0787106	0.0549891	0.347113	0.46798	0.0551179	0.0682643	0.193338	0.178176	0.0127183	0.342461	0.156209	0.203347	0.359402	-0.457658	-0.19864	-0.346072	-0.531513	3	NA	Homoscedastic & Parametric	6.08881e-18	0.00368953	0.720031	0.166923	0.165792	0.988814	0.631148
HORVU4Hr1G058010.1	-0.273597	-0.46956	-0.29325	-0.278622	-0.110911	-0.116148	-0.0194994	-0.224683	-0.033382	-0.135604	-0.293171	-0.0596877	-0.0299831	-0.138115	-0.26815	0.0426443	-0.0430883	-0.129836	0.0864646	0.0257217	0.172037	0.115761	-0.0332636	0.111033	0.0911183	0.247171	0.0140779	-0.0269086	0.127646	-0.0256328	-0.00299026	0.300153	0.18677	0.257703	0.472294	-0.166746	0.132005	-0.340802	-0.465818	3	NA	Homoscedastic & Parametric	1.71916e-19	0.0182565	0.978673	0.505545	0.735848	0.961645	0.988169
HORVU2Hr1G062400.1	-0.287316	-0.577734	-0.192961	-0.225802	-0.250751	-0.0692989	0.0415363	-0.124935	-0.0290805	-0.157028	-0.242999	0.133962	0.0836517	-0.119889	-0.0085503	0.0778116	0.00730724	0.0485035	0.254031	0.137135	0.142907	-0.00773896	-0.00378074	0.16182	0.384358	0.332358	0.167464	-0.00149255	-0.00812347	-0.119186	0.0370143	0.356602	0.24725	0.268374	0.534601	-0.281067	0.11472	-0.257354	-0.502255	3	NA	Homoscedastic & Parametric	1.08917e-17	0.0387277	0.367453	0.41994	0.234586	0.96328	0.88964
HORVU7Hr1G056420.2	-0.294765	-0.476866	-0.200528	-0.248868	-0.186879	-0.120012	-0.123288	-0.044442	-0.0741242	-0.247371	-0.32523	0.0483946	-0.0918969	-0.222964	-0.136983	0.0500645	-0.0451368	-0.0540022	0.325727	0.0205961	0.101215	-0.00925771	0.00177789	-0.0174495	0.136384	0.283086	0.112957	0.139977	-0.0196766	-0.118508	0.175888	0.300113	0.0848888	0.193548	0.526884	-0.357465	0.0926271	-0.258123	-0.599102	3	NA	Homoscedastic & Parametric	2.18077e-18	0.0780705	0.806328	0.42861	0.32996	0.636648	0.518122
HORVU4Hr1G067810.1	-0.309587	-0.596978	-0.163683	-0.291282	-0.271175	-0.144081	0.0164911	-0.110489	-0.121831	-0.145459	-0.356739	0.0307532	-0.0637054	-0.324318	-0.331335	0.00113687	-0.170137	-0.0111982	0.182067	-0.0393283	0.0479741	0.101394	-0.0171068	0.0583254	0.313411	0.135117	0.191954	0.126535	-0.0794359	-0.0543597	-0.00755681	0.0942404	0.149904	0.320247	0.603815	-0.476351	0.0708049	-0.304484	-0.645828	3	NA	Homoscedastic & Parametric	1.9212e-16	0.0395062	0.800098	0.410073	0.281457	0.872405	0.861076
HORVU7Hr1G049190.1	-0.040266	-0.487193	-0.271671	-0.239652	-0.11095	-0.0676789	-0.128718	-0.0319576	-0.183516	-0.104852	-0.235445	0.0789155	0.00460316	-0.276435	-0.152145	0.119071	0.121423	-0.129624	0.272567	0.0341716	-0.0136535	0.270764	0.187871	0.217318	0.185926	0.369755	0.121898	0.200933	0.19189	0.0503115	0.166696	0.302483	0.0987063	0.31755	0.505793	-0.380214	0.0805833	-0.119369	-0.435945	3	NA	Homoscedastic & Parametric	3.06462e-19	0.00438083	0.698043	0.484578	0.557524	0.760411	0.933389
HORVU4Hr1G085750.12	-0.0871135	-0.5462	-0.299604	-0.276713	-0.157921	-0.131649	-0.156601	-0.00769755	-0.125204	-0.225133	-0.214535	0.100612	-0.0450886	-0.167448	-0.266425	0.0340075	0.0306109	-0.161455	0.225664	0.0324073	-0.0453507	-0.0236673	0.131335	0.0949965	0.223353	0.326416	0.15346	0.160749	0.311175	0.0373011	0.0712339	0.223162	-0.0444005	0.105377	0.396041	-0.396441	0.1046	-0.055427	-0.509642	3	NA	Homoscedastic & Parametric	2.21812e-18	0.00530273	0.92043	0.279913	0.599743	0.620856	0.879107
HORVU7Hr1G056590.2	-0.394901	-0.440217	-0.363762	-0.462136	-0.197692	-0.216837	-0.169729	-0.0292954	-0.115206	-0.201424	-0.298166	0.0781868	0.0621209	-0.138377	-0.1465	0.0910171	0.134479	-0.177069	0.390211	-0.0622952	-0.183818	0.104868	-0.000214392	0.0703301	0.173525	0.356833	0.359177	0.333935	0.233933	0.0566685	0.117291	0.168378	-0.101556	0.198635	0.527272	-0.511465	-0.00875887	-0.264577	-0.391836	3	NA	Homoscedastic & Parametric	6.82509e-16	0.0150241	0.802773	0.469386	0.378343	0.628136	0.775901
HORVU1Hr1G092860.1	-0.38654	-0.536209	-0.358125	-0.581036	-0.295359	-0.32428	-0.142669	-0.0853034	-0.153063	-0.195032	-0.348249	-0.0455831	-0.0933763	-0.316884	-0.248014	-0.0146632	-0.0293492	-0.22948	0.376339	0.00464482	-0.240309	0.138902	-0.0126949	-0.0911731	0.2002	0.170777	0.156215	0.169282	0.160487	-0.120756	-0.0107669	0.0335188	-0.021293	0.240078	0.57237	-0.424971	0.0304095	-0.150959	-0.431875	3	NA	Homoscedastic & Parametric	4.28589e-15	0.00851274	0.742228	0.745198	0.817369	0.813543	0.638337
HORVU2Hr1G085800.3	-0.383032	-0.519375	-0.299069	-0.64099	-0.286151	-0.456938	-0.202013	-0.201059	-0.191828	-0.240353	-0.242513	0.0332471	-0.000766214	-0.228256	-0.339914	-0.0368696	-0.000108869	-0.20367	0.207172	0.062197	-0.246087	0.194452	-0.114369	0.0155508	0.218612	0.377852	0.0815497	0.108437	0.371428	-0.107353	-0.00512799	0.192094	-0.124244	0.169875	0.430862	-0.410553	0.209715	-0.0500636	-0.607523	3	NA	Homoscedastic & Parametric	3.16291e-15	0.00675575	0.724965	0.356719	0.855364	0.898353	0.459242
HORVU0Hr1G021230.1	-0.258416	-0.503927	-0.214495	-0.303651	-0.188709	-0.11194	-0.233374	-0.0349801	-0.0679566	-0.233968	-0.222933	0.040359	-0.137693	-0.0360725	-0.074724	0.0965241	0.128828	-0.157276	0.112876	0.00765866	-0.0405164	-0.258434	0.171544	0.196747	0.276815	0.307499	-0.045476	-0.137911	0.184353	0.0559493	0.222477	0.33065	0.0838742	0.362883	0.685859	-0.27808	0.171261	-0.365176	-0.453407	3	NA	Homoscedastic & Non-parametric	1.04681e-17	0.0368202	0.804452	0.410502	0.494678	0.763282	0.915289
HORVU5Hr1G098740.1;HORVU0Hr1G011940.3;HORVU4Hr1G037800.1	-0.296279	-0.601453	-0.362587	-0.290986	-0.0834137	-0.0735315	-0.354513	-0.056283	-0.16988	-0.386814	-0.497866	0.125998	-0.0665077	-0.0622972	-0.0411478	0.184818	0.167241	-0.166088	0.12864	-0.117007	-0.127211	-0.0133481	0.101846	0.165916	0.226666	0.263771	0.0180867	-0.0371909	0.0421202	-0.190567	0.337527	0.266837	0.176509	0.357411	0.615063	-0.402538	-0.0363167	-0.28438	-0.609442	3	NA	Homoscedastic & Parametric	1.67766e-17	0.0897746	0.552457	0.169812	0.149197	0.462792	0.82164
HORVU2Hr1G033100.1	-0.185001	-0.585509	-0.280877	-0.346383	-0.122108	-0.111054	-0.11976	0.00445212	-0.037661	-0.331812	-0.323785	0.153188	-0.102577	-0.0478369	-0.214277	0.129529	0.145739	-0.166031	0.151374	0.0163849	-0.077723	0.208356	0.167773	0.16749	0.24119	0.359603	0.0571446	0.0191163	0.22322	0.0885675	0.0488748	0.0760348	-0.128614	0.150357	0.546421	-0.326573	0.0505817	-0.324501	-0.542288	3	NA	Homoscedastic & Parametric	5.38864e-17	0.0283737	0.899459	0.264341	0.265772	0.751142	0.916605
HORVU6Hr1G065690.2	-0.282807	-0.726237	-0.106164	-0.263998	-0.1743	-0.0475459	-0.155274	0.0295188	-0.0129121	-0.370481	-0.403925	0.209141	0.0548383	-0.013327	-0.223095	0.180373	0.0780869	-0.196202	0.0846078	-0.0466683	-0.071964	-0.0410625	0.0835895	0.208038	0.239082	0.354963	0.096724	0.0165778	0.207263	0.0564148	0.139234	0.169605	-0.0438828	0.271185	0.514442	-0.319556	0.109661	-0.294953	-0.618079	3	NA	Homoscedastic & Parametric	1.8843e-17	0.162528	0.271457	0.040921	0.0855252	0.514795	0.578883
HORVU3Hr1G034750.2	-0.350441	-0.858751	-0.221262	-0.272857	-0.195985	-0.100446	-0.16399	0.0321594	-0.0574391	-0.379034	-0.286477	0.066977	-0.102599	-0.0808518	-0.425954	0.11267	0.0211928	-0.176488	0.233686	0.0787075	0.0718806	-0.00761499	0.131763	0.173639	0.279791	0.368414	0.0940653	0.0319105	0.183762	-0.0133636	0.0829033	0.0877097	0.144901	0.342639	0.710216	-0.336684	0.11571	-0.324341	-0.59763	3	NA	Homoscedastic & Parametric	2.31535e-15	0.0349536	0.659293	0.146797	0.361778	0.996343	0.678625
HORVU3Hr1G073780.1	-0.324502	-0.938008	-0.102038	-0.338494	-0.246981	-0.12187	-0.397404	-0.0984123	-0.165456	-0.459162	-0.414443	0.101661	-0.16301	-0.0115437	-0.353104	0.155106	0.0676825	-0.200091	0.184608	0.167092	-0.109932	0.0391073	0.0100922	0.18148	0.29706	0.342137	0.0778707	-0.025088	0.350552	0.111924	0.270628	0.420422	0.243828	0.436233	0.702519	-0.409158	0.234765	-0.281852	-0.528545	3	NA	Homoscedastic & Parametric	2.30555e-16	0.0109737	0.255124	0.031117	0.407296	0.854314	0.798544
HORVU2Hr1G031450.6	-0.365199	-0.672275	-0.188097	-0.322515	-0.223407	-0.152916	-0.340609	-0.17109	-0.0843119	-0.493072	-0.50335	0.0412671	-0.114532	0.0106155	-0.102915	0.169632	0.0374032	-0.174122	0.186145	-0.0345463	-0.0515352	0.167085	-0.0214648	0.179169	0.151067	0.305804	-0.00661178	-0.0961899	0.162891	0.0184946	0.333882	0.284894	0.0686784	0.374731	0.728965	-0.331523	0.104498	-0.254905	-0.533527	3	NA	Homoscedastic & Parametric	1.54959e-16	0.0992224	0.267453	0.104997	0.3775	0.329382	0.564597
HORVU2Hr1G014000.1	-0.334155	-0.629829	-0.174092	-0.134568	-0.117858	-0.0105082	-0.12754	-0.00772798	0.0257776	-0.263562	-0.295284	0.166628	-0.015318	-0.0752121	-0.149408	0.0720102	0.0806089	-0.0572511	0.13473	0.0259329	-0.0222525	0.118605	0.0333541	0.20313	0.280636	0.34953	0.0792867	-0.0552436	0.142936	0.0597262	0.23481	0.29516	0.0795904	0.202103	0.490712	-0.101888	0.2627	-0.261447	-0.470873	3	NA	Homoscedastic & Parametric	2.21046e-18	0.0724732	0.425902	0.121663	0.529117	0.726831	0.772787
HORVU1Hr1G022810.1	-0.33053	-0.703344	-0.142361	-0.188157	-0.135666	-0.0610524	-0.161226	-0.00096351	0.00486526	-0.42672	-0.350932	0.1032	0.00240592	-0.0404049	-0.140295	0.141174	0.0211954	-0.139535	0.0265238	0.0496711	-0.0348224	0.161379	4.57e-05	0.269448	0.355705	0.298789	0.0570064	-0.0971664	0.169896	-0.044381	0.206287	0.159265	0.0283953	0.104596	0.466816	-0.169597	0.135181	-0.381922	-0.515533	3	NA	Homoscedastic & Parametric	2.9583e-18	0.0282974	0.313731	0.0790324	0.200846	0.856741	0.792127
HORVU7Hr1G082240.2	-0.377268	-0.739356	-0.190093	-0.322999	-0.352664	-0.0841811	-0.194795	-0.220656	-0.0724543	-0.475587	-0.476961	0.140314	0.0257139	-0.0313691	-0.131672	0.0604952	-0.0252966	-0.155444	0.117786	0.0157341	-0.1183	0.19684	-0.0207097	0.244368	0.257751	0.223848	-0.164718	-0.17971	0.056919	-0.118269	0.250527	0.437968	-0.126807	0.239254	0.699053	-0.416054	0.0794081	-0.431004	-0.741779	3	NA	Homoscedastic & Parametric	4.05648e-15	0.25692	0.154757	0.136087	0.104795	0.385184	0.751173
HORVU3Hr1G072910.1	-0.325961	-0.468967	-0.200895	-0.521367	-0.373876	0.00375757	-0.295383	0.00689582	-0.110815	-0.307517	-0.434571	0.0106061	-0.106342	-0.151732	-0.103832	0.139038	0.144857	-0.059129	0.256651	0.090905	-0.0528739	0.294412	0.0231166	0.161646	0.0729999	0.401689	0.087943	0.0579693	0.234932	0.0329082	0.142548	0.248939	-0.131005	0.13495	0.427051	-0.282984	0.240399	-0.230137	-0.447434	3	NA	Homoscedastic & Parametric	1.3052e-16	0.00932584	0.80783	0.621558	0.840603	0.453745	0.821198
HORVU5Hr1G114250.1	-0.304368	-0.460405	-0.14138	-0.337026	-0.116555	-0.0627397	-0.342451	0.0387928	-0.0256239	-0.290462	-0.250859	0.034246	-0.270412	-0.114341	-0.0795006	0.284638	0.0940569	-0.13244	0.211898	-0.0495362	-0.000968243	0.0942419	0.0383887	0.0167466	0.107229	0.296608	-0.0256757	-0.00411608	0.214692	0.155969	0.291437	-0.000537288	-0.0971656	0.227939	0.662556	-0.397768	0.0556876	-0.288412	-0.42637	3	NA	Homoscedastic & Non-parametric	9.49912e-18	0.0719529	0.817166	0.541848	0.464613	0.699978	0.625592
HORVU7Hr1G089120.1	-0.287446	-0.567231	-0.0995381	-0.337822	-0.25526	-0.193323	-0.335057	0.114424	-0.145697	-0.329575	-0.303482	-0.169075	-0.1737	-0.182394	-0.122376	0.237087	0.0518906	-0.135044	0.135776	-0.0531971	-0.0266618	0.343164	0.0748593	0.0242178	0.119657	0.305402	0.00761367	0.0155651	0.292064	0.111457	0.0425915	0.107745	-0.162407	0.153003	0.525467	-0.386636	0.165947	-0.339393	-0.55004	3	NA	Homoscedastic & Parametric	3.67185e-16	0.0289124	0.886152	0.442725	0.671217	0.510736	0.808231
HORVU7Hr1G070330.3	-0.529375	-0.729399	-0.303293	-0.335274	-0.228753	-0.268165	-0.282351	-0.0562366	-0.0250379	-0.318968	-0.305238	0.0255098	-0.139327	0.110205	-0.260039	0.0580742	-0.0325878	-0.242963	0.053794	0.124477	-0.15032	0.376748	0.044009	-0.0151837	0.236548	0.272778	-0.125462	-0.0459221	0.247548	0.0151462	0.187108	-0.0541164	-0.0309141	0.0628798	0.44552	-0.356725	0.0488607	-0.215606	-0.404363	3	NA	Homoscedastic & Parametric	7.21966e-17	0.0664734	0.431446	0.0836545	0.454814	0.429967	0.760999
HORVU2Hr1G079550.1;HORVU7Hr1G100690.1;HORVU7Hr1G033030.1;HORVU2Hr1G079560.3;HORVU7Hr1G012820.2;HORVU6Hr1G007470.1;HORVU6Hr1G007820.1	-0.521531	-1.12494	-0.0381589	-0.434149	-0.210301	-0.328046	-0.257442	-0.155908	-0.139609	-0.736726	-0.551019	0.0148963	0.166728	-0.108839	-0.407741	0.19143	-0.0250416	-0.212914	0.0701863	0.217584	0.13788	0.524243	0.233219	0.379011	0.334583	0.349336	-0.0670622	-0.175894	0.168638	0.147699	0.611031	0.514434	-0.113715	0.401917	0.584752	0.0633434	0.0402158	-0.554673	-0.830471	3	NA	Homoscedastic & Parametric	3.91931e-13	0.0784909	0.16298	0.0350336	0.30235	0.370112	0.362046
HORVU4Hr1G040770.2;HORVU5Hr1G038710.1	-0.339519	-0.449087	-0.0529513	-0.127824	-0.220795	-0.0255456	-0.269928	0.0282882	-0.0690104	-0.39339	-0.3689	0.197998	-0.0287469	-0.0330825	0.0168734	0.0605965	-0.0405412	-0.0707954	0.159399	-0.111628	0.0200287	0.0895769	-0.090835	0.231445	0.334658	0.256432	0.0476929	-0.142125	0.0472755	0.00322914	0.484317	0.558147	0.103071	0.236936	0.67486	-0.175946	0.143592	-0.381145	-0.486782	3	NA	Homoscedastic & Non-parametric	1.85313e-17	0.306482	0.127987	0.0974299	0.125031	0.430395	0.517974
HORVU2Hr1G022090.4	-0.392056	-0.65243	-0.169052	-0.362426	-0.325681	-0.187994	-0.374194	-0.168378	-0.264193	-0.660555	-0.67238	-0.0401256	-0.0818555	0.0388155	-0.162191	0.136723	-0.0415158	-0.0747157	-0.0207134	-0.0098298	-0.0631712	0.0939225	0.00373012	0.30742	0.310389	0.238748	0.0511097	-0.161834	0.00495456	-0.108838	0.338092	0.608219	0.24806	0.480349	0.783543	-0.246226	0.0882355	-0.316368	-0.646358	3	NA	Homoscedastic & Non-parametric	2.92576e-17	0.0417464	0.0593821	0.0291185	0.283289	0.269756	0.444318
HORVU4Hr1G050130.1	-0.515583	-0.607995	-0.381516	-0.232931	-0.285404	-0.12568	-0.0720467	-0.152111	-0.15155	-0.491005	-0.535832	-0.0370204	-0.104226	-0.138335	0.0180801	-0.00629253	-0.0145642	-0.190775	-0.103981	-0.261289	-0.129225	0.180068	-0.0601401	0.313593	0.0707291	0.226399	-0.163055	-0.311191	-0.0385366	-0.107299	0.3862	0.651909	0.134127	0.540564	0.766237	-0.168531	0.292748	-0.193672	-0.442973	3	NA	Homoscedastic & Non-parametric	7.70502e-16	0.213079	0.320789	0.615512	0.622607	0.369753	0.844299
HORVU7Hr1G026030.2	-0.39998	-0.477919	-0.126631	-0.180023	-0.216449	-0.157699	-0.164937	-0.0619864	-0.220362	-0.456695	-0.453834	0.0470741	-0.112789	-0.165128	-0.198578	0.0139384	0.0776168	0.151281	0.118412	0.032036	0.0465885	0.242574	0.0321993	0.13872	0.126156	0.293987	0.0229456	-0.0430122	0.142561	0.0430996	0.385278	0.33449	-0.0487507	0.159441	0.654002	-0.264508	0.261821	-0.219516	-0.519154	3	NA	Homoscedastic & Parametric	5.49661e-17	0.0928443	0.229588	0.181778	0.699817	0.295856	0.39021
HORVU2Hr1G073320.1	-0.407696	-0.465404	-0.37801	-0.22048	-0.136531	-0.104622	-0.326718	-0.0726558	-0.264667	-0.472578	-0.471639	0.0481551	-0.0312347	-0.288102	-0.148241	0.0395992	-0.0172234	-0.00728566	0.180332	0.0916342	-0.109968	0.238243	0.11422	0.0798855	0.0766026	0.231187	0.0471134	-0.117341	0.16156	-0.0285597	0.462783	0.27641	0.0409343	0.0965591	0.371523	-0.385265	0.000240068	-0.411346	-0.623054	3	NA	Homoscedastic & Parametric	2.95024e-18	0.0162982	0.400424	0.270331	0.177834	0.60309	0.723357
HORVU7Hr1G050170.1	-0.637191	-0.779511	-0.364155	-0.363596	-0.244007	-0.188873	-0.429283	-0.276282	-0.2451	-0.584792	-0.531773	0.055321	-0.420206	-0.273423	-0.29697	0.19076	0.284654	0.00769133	-0.148366	0.1732	0.0781557	0.437262	0.147987	0.521153	0.0265812	0.438505	-0.0934951	-0.309077	0.381128	0.161561	0.797924	1.01484	-0.0730546	0.339841	0.683722	-0.390158	-0.0601421	-0.375514	-0.507731	3	NA	Homoscedastic & Non-parametric	3.50705e-14	0.00495393	0.43105	0.288459	0.715254	0.483993	0.795366
HORVU1Hr1G042220.1	-0.427557	-0.568405	-0.207608	-0.278007	-0.124223	-0.114906	-0.271924	-0.205297	-0.226046	-0.597425	-0.572778	0.0851471	-0.16542	-0.0970627	-0.14887	0.176843	0.0593365	-0.0196522	0.0745412	0.0864218	0.0383921	0.247559	0.0689291	0.15535	0.234389	0.237415	0.024587	-0.180075	0.0595666	-0.0305725	0.607366	0.605085	0.070881	0.297353	0.675211	-0.377965	-0.00904474	-0.390545	-0.727249	3	NA	Homoscedastic & Non-parametric	1.41576e-17	0.0489904	0.137752	0.107608	0.0814967	0.235897	0.419694
HORVU4Hr1G077240.1	-0.314328	-0.568205	-0.327361	-0.317647	-0.25751	-0.285329	-0.315321	-0.237453	-0.314369	-0.572494	-0.580751	-0.134078	-0.462573	-0.262771	-0.243884	0.165521	0.061359	0.0742548	0.222426	0.217263	0.118601	0.226455	0.115483	0.230688	0.294347	0.342096	0.0945462	-0.175039	0.205913	0.157414	0.546886	0.651216	0.162538	0.350985	0.716837	-0.402452	0.0195631	-0.363607	-0.689851	3	NA	Homoscedastic & Non-parametric	6.91883e-19	5.1066e-05	0.724785	0.376617	0.724655	0.899409	0.730805
HORVU5Hr1G096060.1	-0.409004	-0.841752	-0.401275	-0.50748	-0.281277	-0.305786	-0.540008	-0.226684	-0.365488	-0.841914	-0.677747	-0.156237	-0.466491	-0.265899	-0.263659	0.185952	0.090946	0.10627	0.149517	0.102865	0.0167765	0.0515092	0.0124757	-0.0297261	0.116696	0.286029	-0.179705	-0.20227	0.0923876	0.0280249	0.732402	0.639385	-0.0669261	0.197706	0.552992	-0.444888	-0.0163758	-0.457496	-0.82655	3	NA	Homoscedastic & Non-parametric	1.12427e-15	0.0105214	0.686182	0.265269	0.712762	0.541678	0.285317
HORVU3Hr1G115820.3	-0.394995	-1.03424	-0.321005	-0.554357	-0.558045	-0.468552	-0.368647	-0.136394	-0.36588	-0.65558	-0.647969	-0.170839	-0.332021	-0.258513	-0.234975	0.185208	0.123122	0.0326367	0.167978	0.10049	0.263582	0.429853	-0.00780017	0.29469	0.529789	0.273666	0.326256	0.0378308	0.175028	0.0410471	0.746617	0.607119	0.137437	0.431584	1.02195	-0.328601	-0.103219	-0.435663	-0.669853	3	NA	Homoscedastic & Non-parametric	8.83015e-16	0.000131223	0.51635	0.145198	0.741109	0.809419	0.624321
HORVU7Hr1G075250.1	-0.589222	-0.83738	-0.402249	-0.528729	-0.40319	-0.389654	-0.459493	-0.279316	-0.22357	-0.692097	-0.514222	-0.174044	-0.410394	-0.19491	-0.18715	0.130766	0.130407	-0.0401457	0.150386	-0.0128384	-0.250427	0.180348	0.0362932	0.232618	0.290274	0.266247	0.0492462	-0.0897287	0.118683	0.0615283	0.777125	0.58874	0.199866	0.576909	0.98813	-0.134707	0.0809375	-0.370764	-0.639343	3	NA	Homoscedastic & Non-parametric	1.75666e-16	0.00100175	0.48337	0.330265	0.491393	0.600457	0.880502
HORVU5Hr1G052280.1	-0.602846	-0.940127	-0.317646	-0.462497	-0.537419	-0.242015	-0.639057	-0.485752	-0.336366	-0.75567	-0.642562	-0.151319	-0.519897	-0.164768	-0.267214	0.347865	0.114359	-0.0881656	0.0405949	0.203497	-0.0133527	0.146231	0.137031	0.297902	0.366371	0.348789	-0.0313523	-0.142816	0.0348257	0.00151523	0.760447	0.807626	0.215938	0.63251	0.933532	-0.226711	0.0479791	-0.643219	-0.669307	3	NA	Homoscedastic & Non-parametric	1.21173e-15	0.00130096	0.118512	0.143122	0.86083	0.199339	0.586898
HORVU2Hr1G030880.1	-0.524356	-1.29095	-0.4856	-0.382441	-0.356259	-0.27574	-0.507391	-0.416068	-0.419506	-0.67888	-0.715006	-0.217919	-0.601847	-0.307254	-0.542622	0.147238	-0.0477317	-0.068532	0.0548795	0.118656	0.0710495	0.381787	0.256816	0.36876	0.040573	0.0957627	0.062532	-0.236035	0.0721254	0.0833305	0.775489	0.710212	0.0953132	0.615639	0.982397	-0.410737	-0.173115	-0.466083	-0.751953	3	NA	Homoscedastic & Non-parametric	1.74752e-15	0.000816233	0.561206	0.10209	0.772659	0.795471	0.238173
HORVU2Hr1G086390.1	-0.710839	-0.627558	-0.275253	-0.522315	-0.399877	-0.291243	-0.413723	-0.231887	-0.144708	-0.406601	-0.448151	-0.179334	-0.157113	-0.13718	-0.127345	0.105599	0.0725124	-0.241956	-0.0150912	0.114253	-0.0571509	0.195722	0.0733818	0.0969061	0.148358	0.245147	0.0370515	-0.0302194	0.0813758	-0.158297	0.59175	0.442919	0.0858546	0.399829	0.653692	-0.216715	-0.200492	-0.181142	-0.702542	3	NA	Homoscedastic & Non-parametric	6.13856e-19	0.00285397	0.267132	0.24476	0.580956	0.303213	0.923
HORVU5Hr1G122170.4	-0.458838	-0.717216	-0.38547	-0.376281	-0.587367	-0.454209	-0.451378	-0.225851	-0.181598	-0.347783	-0.454294	0.105858	-0.195323	-0.276428	-0.400903	0.157592	0.20675	0.093788	0.0038435	0.116059	-0.21542	0.261792	-0.054699	0.394483	0.315023	0.415656	0.253012	-0.14979	0.187589	-0.345439	0.75676	0.796842	0.325519	0.390051	0.855382	-0.310506	-0.0416597	-0.355274	-0.622146	3	NA	Homoscedastic & Non-parametric	1.55602e-17	0.000456095	0.247131	0.0255924	0.413029	0.52708	0.909742
HORVU3Hr1G026880.1	-0.412858	-0.452368	-0.32303	-0.448491	-0.436034	-0.272702	-0.196482	-0.189911	-0.184022	-0.304814	-0.468202	-0.00809087	-0.0818398	-0.203539	-0.259107	-0.0364411	0.114298	-0.0340575	0.100349	0.123901	0.0119866	0.317347	-0.0322528	0.0845335	0.0367749	0.294264	0.14441	-0.114216	0.120049	-0.317858	0.391881	0.590496	-0.00201265	0.144017	0.60264	-0.305195	0.111745	-0.287611	-0.440167	3	NA	Heteroscedastic & Non-parametric	2.79969e-18	0.00987399	0.38574	0.281357	0.927691	0.417204	0.992764
HORVU1Hr1G039260.2	-0.0345034	-0.787455	-0.262814	-0.351102	-0.286947	-0.118202	-0.277301	-0.322238	-0.209517	-0.470225	-0.508475	-0.103797	-0.0759237	-0.134818	-0.366235	0.100267	-0.0654193	-0.140287	0.148079	0.0938307	0.0159574	-0.0123788	-0.00281277	0.0425389	0.176718	0.215853	0.209508	-0.0329856	-0.0401256	0.0425229	0.548729	0.454923	0.155684	0.245526	0.670628	-0.330881	0.0535607	-0.350814	-0.673656	3	NA	Homoscedastic & Parametric	4.98524e-17	0.0164113	0.551639	0.116968	0.38075	0.960173	0.573082
HORVU6Hr1G070670.1	-0.316859	-0.643634	-0.17912	-0.358558	-0.339761	-0.287927	-0.400578	-0.305157	-0.20329	-0.653636	-0.637889	-0.0917128	-0.343069	-0.216346	-0.318372	0.147902	0.0247024	0.0394037	0.103399	0.266552	-0.0331127	-0.0906159	0.117346	0.231903	0.248785	0.327248	0.010011	-0.13611	0.190884	-0.452777	0.521788	0.658385	-0.0496573	0.211356	0.511631	0.0279667	0.0884884	-0.472334	-0.647119	3	NA	Homoscedastic & Parametric	2.8865e-14	0.00305559	0.45552	0.205128	0.914906	0.82824	0.723464
HORVU7Hr1G027220.3	-0.353187	-0.364311	-0.230142	-0.120398	-0.114983	-0.00395629	-0.153898	-0.0916612	-0.173736	-0.404428	-0.301164	0.0519734	-0.0732776	-0.0508894	-0.217083	-0.0241719	-0.0357858	-0.077988	0.0579402	0.0255448	0.0051609	0.185138	0.0170901	0.0417738	0.0153501	0.23821	-0.105744	-0.197942	0.0479192	-0.0806077	0.253147	0.655718	-0.122394	0.000216166	0.562625	-0.372658	-0.0591873	-0.307419	-0.564688	3	NA	Heteroscedastic & Non-parametric	2.72572e-18	0.433563	0.213818	0.282236	0.0589145	0.252608	0.498745
HORVU6Hr1G090170.1;HORVU1Hr1G039160.1	-0.534252	-0.189618	-0.448956	-0.470597	-0.351632	-0.280967	-0.192076	-0.343727	-0.390999	-0.365512	-0.722667	0.0597166	-0.130675	-0.260076	-0.413832	0.0083734	0.0446072	-0.170248	0.167172	0.187227	0.129727	0.138971	0.220357	0.329846	0.19524	0.413344	0.269522	0.00121626	0.0508824	-0.070457	0.3808	0.525925	0.183306	0.326412	0.525958	-0.288426	0.0404349	-0.0962714	-0.5471	3	NA	Homoscedastic & Parametric	1.02226e-16	0.000234305	0.238659	0.403239	0.822077	0.80045	0.641682
HORVU5Hr1G052240.6	-0.499644	-0.554742	-0.3502	-0.363386	-0.321694	-0.184394	-0.244211	-0.210276	-0.228942	-0.426561	-0.538997	0.0540881	-0.0494815	-0.133867	-0.185725	0.151243	0.0280592	-0.0634732	0.132987	0.342647	0.0589562	0.052829	-0.0478675	0.264367	0.321764	0.298024	0.129522	-0.102844	0.00188164	-0.191902	0.409514	0.327477	0.266184	0.358876	0.52573	-0.290546	-0.0381732	-0.222946	-0.515256	3	NA	Homoscedastic & Parametric	2.93203e-19	0.000199966	0.118828	0.121256	0.390741	0.960406	0.414232
HORVU4Hr1G001220.3	-0.525603	-0.803321	-0.357756	-0.567957	-0.476892	-0.332013	-0.319334	-0.330301	-0.242304	-0.463248	-0.577511	-0.0401977	-0.181464	-0.0894955	-0.295103	0.358831	0.0598569	-0.0932257	0.157435	0.45531	0.105823	0.124176	0.0465117	0.309383	0.320613	0.218689	0.124856	0.0760762	-0.0968811	-0.185684	0.15667	0.517216	0.388054	0.496119	0.484846	-0.21818	0.0603582	-0.260539	-0.657043	3	NA	Homoscedastic & Parametric	3.41428e-16	0.000190078	0.233085	0.133581	0.93253	0.692984	0.652198
HORVU5Hr1G009600.1;HORVU1Hr1G072270.1;HORVU3Hr1G086410.2;HORVU5Hr1G009610.2	-0.662511	-0.831828	-0.16442	-0.447632	-0.441752	-0.217816	-0.37792	-0.309079	-0.361544	-0.57018	-0.629507	-0.0405974	-0.163183	-0.0974036	-0.335897	0.184871	0.00477801	-0.111435	0.0372689	0.373784	0.112027	0.128788	-0.000538836	0.188006	0.151134	0.297604	0.187538	0.0521348	0.00343779	-0.0972873	0.0557966	0.389682	0.222848	0.330362	0.380547	-0.166171	0.0173991	-0.245728	-0.604422	3	NA	Homoscedastic & Parametric	6.14405e-19	0.00045359	0.0186253	0.0190179	0.621719	0.18863	0.868263
HORVU6Hr1G044840.1	-0.489332	-0.548907	-0.365232	-0.258958	-0.307656	-0.163818	-0.1081	-0.249576	-0.37019	-0.43876	-0.617898	0.011322	-0.0718157	-0.319894	-0.36651	0.0358007	0.0511757	0.232479	0.172028	0.128837	0.217689	0.487002	0.158871	0.302509	-0.0496576	0.337737	0.0790747	-0.0737306	0.071725	0.0231975	0.122159	0.625186	0.11438	0.279997	0.650519	-0.281845	0.184833	-0.0554285	-0.330369	3	NA	Homoscedastic & Parametric	7.21618e-15	0.0276353	0.269835	0.328763	0.566025	0.226394	0.318154
HORVU1Hr1G079370.1	-0.608326	-0.788648	-0.435263	-0.487945	-0.509919	-0.272349	-0.204925	-0.365171	-0.560504	-0.308332	-0.627565	-0.0791453	0.087594	-0.366455	-0.405835	-0.0339346	-0.0102987	-0.0919588	0.0139331	0.0769322	0.16017	0.168009	-0.203772	0.148155	-0.0276101	0.324684	0.273419	0.03737	0.0627611	-0.112683	-0.0821557	0.746969	0.217097	0.144829	0.51644	-0.349357	0.155873	-0.0181862	-0.459486	3	NA	Homoscedastic & Parametric	1.34155e-13	0.0221154	0.20919	0.252689	0.587716	0.391185	0.973951
HORVU3Hr1G068500.2	-0.641411	-0.702813	-0.301543	-0.468307	-0.56268	-0.232212	-0.342639	-0.208104	-0.21355	-0.462988	-0.528495	0.291077	0.111649	-0.145568	-0.447081	0.0793718	0.209268	-0.137327	0.10133	0.262787	0.1266	0.414466	-0.0403663	0.147909	0.279561	0.451593	0.202965	-0.0538637	0.0835679	-0.184032	0.179594	0.264758	0.0914869	0.125456	0.635615	-0.451317	0.123057	-0.199913	-0.510612	3	X471	Homoscedastic & Parametric	2.55199e-15	0.0408961	0.0447644	0.0291941	0.316535	0.0994258	0.700037
HORVU2Hr1G029890.1	-0.636979	-0.847192	-0.47832	-0.502922	-0.513056	-0.271038	-0.247456	-0.215034	-0.339633	-0.392262	-0.599045	0.0516087	0.115965	-0.340361	-0.334768	0.0441251	0.144117	-0.0897148	0.187851	0.14949	0.253684	0.24143	0.0457838	0.183091	0.212868	0.538917	0.269078	-0.0808786	0.0730468	-0.0288627	0.310126	0.343887	0.168682	0.0791363	0.609066	-0.668122	0.172696	-0.494135	-0.540754	3	X471	Homoscedastic & Parametric	6.92219e-14	0.00949509	0.239158	0.18316	0.448087	0.35882	0.686622
HORVU7Hr1G088580.1;HORVU2Hr1G055560.1	-0.309806	-0.699728	-0.254829	-0.436878	-0.461812	-0.218089	-0.128711	-0.121687	-0.182874	-0.248619	-0.571855	0.119338	0.122235	-0.233997	-0.195294	-0.0220728	0.0657346	-0.166672	0.221543	0.0714679	0.260024	0.156382	0.189925	0.224063	0.0283388	0.348526	0.120716	-0.0484329	0.084345	-0.0729917	0.103481	0.284999	0.189578	0.211209	0.297521	-0.311126	0.154711	-0.120679	-0.350746	3	X471	Homoscedastic & Parametric	1.26133e-17	0.0430312	0.259311	0.0831645	0.854681	0.422636	0.243397
HORVU6Hr1G009400.2;HORVU7Hr1G067060.1	-0.523938	-0.661532	-0.311255	-0.404434	-0.378806	-0.203011	-0.188051	-0.228193	-0.276457	-0.295177	-0.521717	0.117258	0.0623059	-0.266206	-0.326131	-0.0186877	0.109627	-0.0302788	0.201655	0.080491	0.0111744	0.360038	0.0572094	0.249449	0.0254333	0.471219	0.155379	-0.0552766	0.0524674	-0.125228	0.158267	0.561282	-0.0226116	0.115277	0.327355	-0.258599	0.235423	-0.0499811	-0.385644	3	X471	Homoscedastic & Parametric	1.46298e-15	0.0479025	0.203648	0.144568	0.731997	0.17721	0.595888
HORVU2Hr1G010870.8;HORVU2Hr1G010890.2	-0.473829	-0.758377	-0.291792	-0.393348	-0.369695	-0.207868	-0.204738	-0.293195	-0.294763	-0.244083	-0.49804	0.113488	0.0952964	-0.291699	-0.405146	-0.0796892	0.0354853	-0.0406317	0.168997	0.0777484	0.159637	0.296104	0.0741531	0.133511	0.0392171	0.407994	0.224729	-0.105122	0.0746362	-0.0657123	0.250766	0.476695	0.1494	0.129958	0.39808	-0.263622	0.204134	-0.145404	-0.324533	3	X471	Homoscedastic & Parametric	5.54975e-17	0.0344589	0.147047	0.0594277	0.876603	0.258805	0.299492
HORVU2Hr1G099230.8	-0.601225	-0.934684	-0.374293	-0.359634	-0.384504	-0.231947	-0.268025	-0.328782	-0.203841	-0.251233	-0.582692	0.0408445	0.0258972	-0.263569	-0.40069	-0.0455143	0.00742068	-0.275074	0.0681693	0.0822766	0.104578	0.0961938	0.0919344	0.276109	0.115087	0.426784	0.232244	0.0480185	0.050949	-0.127434	0.301857	0.476352	0.191401	0.157261	0.345974	-0.298698	0.215508	-0.12201	-0.379683	3	X471	Homoscedastic & Parametric	1.19962e-16	0.00647229	0.20617	0.0475232	0.724514	0.517978	0.760956
HORVU5Hr1G066000.1	-0.421231	-0.814841	-0.213137	-0.491776	-0.54997	-0.327571	-0.238132	-0.356761	-0.453299	-0.469271	-0.788909	-0.0397391	0.0148625	-0.245704	-0.439079	0.0476839	-0.0403487	0.00460985	-0.00668469	0.269976	0.132559	0.304115	0.108524	0.241547	0.129604	0.254877	0.188462	-0.0449495	-0.059251	-0.120559	0.316085	0.420046	0.112872	0.213727	0.411356	-0.300322	0.168921	-0.18844	-0.494875	3	X471	Homoscedastic & Parametric	1.11164e-17	0.00221049	0.045645	0.0196385	0.991704	0.272732	0.450794
HORVU2Hr1G079780.3	-0.622697	-1.00467	-0.609571	-0.669698	-0.501199	-0.306438	-0.306192	-0.438059	-0.558558	-0.639968	-0.965889	0.0972897	-0.136425	-0.515007	-0.715086	0.0391277	0.091687	-0.203834	0.0955551	0.0810686	0.113184	0.109755	0.0548997	0.114588	0.378778	0.475626	0.285576	0.0183377	0.0357056	-0.328581	0.284676	0.617668	0.423256	0.276158	0.385087	-0.361428	0.0445781	-0.0778049	-0.541935	3	X471	Homoscedastic & Parametric	8.78083e-14	0.000500491	0.22483	0.11109	0.472331	0.488275	0.868213
HORVU5Hr1G048830.1;HORVU2Hr1G052650.1	-0.505991	-0.63599	-0.377409	-0.458788	-0.452749	-0.123352	-0.202824	-0.179283	-0.335535	-0.257533	-0.622869	-0.181022	0.00615484	-0.314583	-0.287009	0.0318355	0.044186	-0.0769235	0.205671	0.206642	0.111622	0.264037	0.28027	0.257953	-0.0512368	0.304785	0.223828	-0.0671694	0.144118	-0.00248678	0.294883	0.358382	0.126573	0.0298384	0.221937	-0.300003	0.10481	0.0561331	-0.225115	3	NA	Homoscedastic & Parametric	2.20334e-17	0.000311773	0.490346	0.409555	0.149713	0.843587	0.846687
HORVU4Hr1G049670.2	-0.656707	-0.481762	-0.370998	-0.618875	-0.674656	-0.118943	-0.174879	-0.240397	-0.366062	-0.282077	-0.656286	0.118059	0.128003	-0.375799	-0.325622	-0.0462249	0.13359	-0.0933163	0.153561	0.205534	0.423221	0.500282	0.188395	0.233883	-0.116076	0.546982	0.0365558	-0.186373	-0.0687352	-0.231709	0.241328	0.366865	0.123328	0.0432389	0.449378	-0.35294	0.277441	0.126469	-0.251208	3	NA	Homoscedastic & Parametric	1.77213e-12	0.128688	0.233634	0.45273	0.365417	0.116076	0.469827
HORVU3Hr1G080130.4	-0.479695	-0.628552	-0.363945	-0.540964	-0.484802	-0.242141	-0.110354	-0.186636	-0.305919	-0.267134	-0.572324	-0.0914879	-0.0581055	-0.334545	-0.302806	-0.0880114	-0.0589887	-0.398942	0.138611	-0.0568397	-0.104108	0.344751	0.144974	0.254098	-0.0107122	0.400474	0.0417631	0.0631574	0.18488	-0.255176	0.109913	0.4683	0.110232	0.168788	0.338904	-0.316709	0.133579	-0.0828703	-0.254294	3	NA	Homoscedastic & Parametric	2.67276e-15	0.00793805	0.616362	0.53662	0.309308	0.462215	0.576942
HORVU4Hr1G078020.1	-0.300056	-0.805278	-0.447518	-0.80498	-0.622335	-0.350904	-0.241385	-0.0330603	-0.222493	-0.300739	-0.552214	-0.064898	-0.138338	-0.488725	-0.314935	0.199429	0.134669	-0.0484786	0.172579	0.271937	0.195044	0.272897	0.104566	0.148042	0.202433	0.434134	0.227807	0.106922	0.0436912	-0.0178772	0.224353	0.648974	0.0913648	0.248598	0.434021	-0.115001	0.271881	-0.359836	-0.320566	3	NA	Homoscedastic & Parametric	5.67453e-14	0.0002192	0.601461	0.651282	0.105139	0.985857	0.778143
HORVU4Hr1G023530.1;HORVU4Hr1G023570.2	-0.529559	-0.945242	-0.42621	-0.69826	-0.49904	-0.381178	-0.452626	-0.503071	-0.322913	-0.648362	-0.62831	-0.253444	-0.401604	-0.308301	-0.487487	-0.000645595	0.0513407	-0.00452136	0.0974275	0.128817	0.00271391	0.14348	-0.00111634	0.0833595	0.0820452	0.371276	0.098133	-0.0769499	0.146642	0.0802411	0.366882	0.709633	0.222085	0.307166	0.712423	-0.0904656	0.313707	-0.391527	-0.413434	3	NA	Homoscedastic & Non-parametric	1.93698e-17	0.000175563	0.467351	0.197888	0.0247843	0.552558	0.460801
HORVU0Hr1G017330.6	-0.282678	-0.149584	-0.383032	-0.347044	-0.158838	-0.182546	-0.190485	-0.139162	-0.0579807	-0.15379	-0.27303	-0.0381003	-0.133744	-0.279286	-0.187887	0.0528717	-0.00112632	0.192319	0.298032	0.0514262	0.00627659	0.262012	0.111383	0.0869368	0.142187	0.3073	0.108051	0.0948958	0.133332	0.0599666	0.22891	0.379426	0.0561186	0.219808	0.548467	-0.522936	-0.00877427	-0.252257	-0.454771	3	NA	Homoscedastic & Parametric	2.39134e-19	0.00079533	0.462556	0.735836	0.557392	0.891236	0.961669
HORVU3Hr1G040710.1	-0.312926	-0.203622	-0.292641	-0.439324	-0.430593	-0.376825	-0.270778	-0.26475	-0.221493	-0.427218	-0.39979	0.0024952	-0.348817	-0.304737	-0.115564	0.112889	0.185636	0.333084	0.378227	0.152442	-0.120887	0.324747	0.0650739	0.181453	0.263968	0.273244	0.0387199	-0.00387058	0.243758	0.158546	0.255921	0.454062	0.14486	0.319312	0.634634	-0.641703	-0.0249498	-0.381809	-0.72421	3	NA	Homoscedastic & Parametric	2.7906e-16	0.000342267	0.653568	0.995618	0.316305	0.723353	0.978961
HORVU3Hr1G090970.2	-0.409981	-0.389432	-0.376757	-0.189835	-0.136918	-0.171554	-0.234465	-0.237215	-0.250668	-0.403191	-0.236359	-0.0443906	-0.156127	-0.0723388	-0.390946	0.0763286	0.0840916	0.150353	0.384901	0.105221	0.00995399	0.173585	0.249226	0.13155	0.222169	0.502322	0.161642	0.209452	0.270661	0.138345	0.134786	0.383978	0.0964202	0.342403	0.564664	-0.381166	0.181421	-0.179701	-0.330342	3	NA	Homoscedastic & Parametric	1.09906e-17	0.00221696	0.326407	0.334003	0.979287	0.322514	0.435024
HORVU1Hr1G070110.1	-0.680862	-0.654168	-0.551019	-0.533891	-0.274018	-0.123367	-0.451862	-0.211042	-0.211413	-0.275894	-0.336939	-0.0711379	-0.315921	-0.297654	-0.146445	0.0977637	0.128149	0.161984	0.449397	0.0700959	0.0300725	0.089368	0.250215	0.0978666	0.142826	0.411756	0.1662	0.190017	0.293173	0.141751	0.251742	0.519589	0.201985	0.399148	0.645635	-0.485269	0.0564715	-0.0944259	-0.366203	3	NA	Homoscedastic & Parametric	2.78936e-15	0.000202819	0.873108	0.922922	0.347679	0.907381	0.732496
HORVU3Hr1G047230.5	-0.524944	-0.399601	-0.554224	-0.517052	-0.375328	-0.250126	-0.182392	-0.296577	-0.304801	-0.370587	-0.399867	-0.102592	-0.264889	-0.365764	-0.384387	0.0414889	-0.0104256	0.0367154	0.295946	0.0492204	0.0155537	0.222647	0.104392	0.0835887	0.248213	0.308988	0.139081	0.206413	0.1781	0.0619346	0.137012	0.325223	0.167223	0.186002	0.449214	-0.426899	-0.0617233	-0.20262	-0.402389	3	NA	Homoscedastic & Parametric	1.91752e-19	1.97601e-06	0.838016	0.758956	0.41446	0.752223	0.580284
HORVU1Hr1G063700.2	-0.503001	-0.569037	-0.625218	-0.426341	-0.2471	-0.247228	-0.269659	-0.321942	-0.268708	-0.391255	-0.418008	-0.0865413	-0.398927	-0.439708	-0.37898	0.0228458	0.00797272	0.110094	0.301957	0.123719	0.0561397	0.245963	0.0929615	0.106332	0.145041	0.351283	0.12269	0.125722	0.18323	0.0942878	0.193776	0.427847	0.130039	0.280003	0.571282	-0.500014	-0.0911222	-0.311444	-0.607473	3	NA	Homoscedastic & Parametric	1.74945e-17	8.51338e-06	0.725757	0.915252	0.86917	0.941705	0.922052
HORVU1Hr1G091820.2	-0.544565	-0.438285	-0.494833	-0.421067	-0.225404	-0.253804	-0.170323	-0.197247	-0.161785	-0.209723	-0.324112	-0.116463	-0.126289	-0.160525	-0.230393	0.0402549	0.0328559	0.307687	0.150806	0.0901244	0.0659522	0.158644	-0.0013346	0.00166658	0.195693	0.266975	0.0177259	-0.0703004	0.0915813	0.0265361	0.172308	0.549902	0.277624	0.32522	0.609205	-0.330555	0.069397	-0.193863	-0.468999	3	NA	Homoscedastic & Parametric	8.76371e-18	0.00250905	0.957247	0.827762	0.754744	0.912159	0.679858
HORVU3Hr1G064730.1	-0.214141	-0.380395	-0.372479	-0.332613	-0.251196	-0.273974	-0.126485	-0.063583	0.00197765	-0.271124	-0.337164	0.0559741	-0.126434	-0.419688	-0.180845	0.0262845	0.0829202	-0.0530869	0.193264	0.0317611	0.144457	0.176808	0.107147	0.0554081	0.140484	0.287396	0.0398893	0.08638	0.193302	0.0859964	0.153002	0.455002	0.222433	0.191842	0.414507	-0.333173	0.0547542	-0.11198	-0.43932	3	NA	Homoscedastic & Parametric	1.05202e-19	0.000954243	0.457808	0.773595	0.7505	0.876941	0.80895
HORVU2Hr1G020690.6	-0.436773	-0.604033	-0.480933	-0.504286	-0.170948	-0.26047	-0.288403	-0.223512	-0.311449	-0.282526	-0.396041	-0.0539055	-0.295897	-0.468687	-0.229969	-0.155566	-0.107491	-0.0545873	0.34785	0.0662487	-0.130377	0.3711	0.149866	-0.119931	0.0799642	0.439653	-0.12087	-0.107456	0.259588	0.013321	0.399774	0.913248	0.481093	0.493795	0.818772	-0.949065	-0.327552	-0.191908	-0.506147	3	NA	Homoscedastic & Non-parametric	6.75751e-16	0.00750561	0.616447	0.995466	0.423242	0.938019	0.879467
HORVU2Hr1G022140.3;HORVU2Hr1G022110.2	-0.394014	-0.482191	-0.499283	-0.661771	-0.456776	-0.522718	-0.366641	-0.377813	-0.462683	-0.502193	-0.524224	-0.256652	-0.425737	-0.618502	-0.347705	-0.186123	-0.11832	-0.0838241	0.356631	0.087441	-0.106854	0.359764	0.167046	-0.03841	0.143829	0.498396	0.0229316	0.0572514	0.347604	0.136855	0.565778	0.860339	0.553634	0.554384	0.754698	-0.671912	-0.0843733	-0.266165	-0.668898	3	NA	Homoscedastic & Non-parametric	2.66323e-17	3.10533e-05	0.696796	0.75064	0.506918	0.844351	0.74044
HORVU2Hr1G027370.1;HORVU2Hr1G027400.5	-0.463757	-0.549357	-0.590704	-0.509776	-0.218128	-0.444556	-0.385839	-0.25041	-0.319456	-0.336746	-0.45407	-0.192384	-0.252618	-0.449284	-0.302609	-0.069031	-0.0299935	0.00832962	0.323668	0.102464	-0.0839338	0.242535	0.0911873	0.0212769	0.0768989	0.357954	0.0499225	0.101921	0.250069	0.0189331	0.297617	0.661403	0.383457	0.364371	0.619465	-0.678097	-0.238063	-0.353967	-0.560541	3	NA	Homoscedastic & Non-parametric	2.53131e-20	1.47713e-05	0.426638	0.719002	0.575081	0.632962	0.882644
HORVU7Hr1G104220.3	-0.435557	-0.463509	-0.348136	-0.349625	-0.179378	-0.24678	-0.0873548	-0.139865	0.0541889	-0.0935534	-0.249967	0.110459	-0.094915	-0.137069	-0.320148	-0.0477732	0.0134776	-0.105685	0.225215	0.0630696	0.0682697	0.283844	0.108766	0.0502708	0.145994	0.310243	0.0929282	0.07785	0.180974	0.026171	0.415636	0.320405	0.116081	0.109974	0.443791	-0.404523	0.0375096	-0.211641	-0.440872	3	NA	Homoscedastic & Parametric	1.66021e-18	0.0130057	0.976755	0.316194	0.460465	0.84731	0.677056
HORVU4Hr1G072940.4	-0.47119	-0.564192	-0.486145	-0.441375	-0.284735	-0.300176	-0.250573	-0.25184	-0.0923146	-0.147331	-0.305794	-0.0604419	-0.305061	-0.309374	-0.359748	0.0304457	0.0391965	-0.0122204	0.236661	-0.00216491	-0.00637666	0.196588	0.0110341	0.0611958	0.242262	0.292375	0.105765	0.0899468	0.168968	-0.0220269	0.456528	0.500436	0.278216	0.307382	0.709711	-0.401691	0.0267824	-0.319975	-0.375168	3	NA	Homoscedastic & Non-parametric	1.41339e-20	6.88674e-05	0.459081	0.671753	0.570312	0.62324	0.895101
HORVU0Hr1G023290.1;HORVU1Hr1G068640.1	-0.309954	-0.584536	-0.533491	-0.459043	-0.266131	-0.183063	-0.33557	-0.185943	-0.123694	-0.353828	-0.395914	-0.00701492	-0.166895	-0.226281	-0.232187	0.0839913	-0.015803	-0.048301	0.189229	0.105914	-0.0285502	0.0121918	-0.0151861	0.0118294	0.256144	0.352012	0.140533	-0.0414768	0.148129	-0.239728	0.548549	0.367832	0.228321	0.230571	0.588785	-0.419532	-0.0863401	-0.393117	-0.481552	3	NA	Homoscedastic & Parametric	1.54382e-17	0.000443122	0.863795	0.544083	0.581361	0.616471	0.460692
HORVU1Hr1G049980.3	-0.475081	-0.61014	-0.86322	-0.539385	-0.167669	-0.42115	-0.247493	-0.220939	-0.177826	-0.0720741	-0.329974	0.0181834	-0.288106	-0.306913	-0.250737	-0.132586	-0.0303448	0.0136386	0.215137	-0.0448517	0.340978	0.229797	0.0824278	0.123757	0.26375	0.183215	0.133635	0.188393	0.102469	0.00422544	0.624623	0.616851	0.373035	0.316979	0.825408	-0.720922	-0.306437	-0.306529	-0.377231	3	NA	Homoscedastic & Parametric	1.58135e-14	0.000596242	0.303168	0.995086	0.755161	0.375428	0.909356
HORVU1Hr1G029770.15	-0.598161	-0.409952	-0.688265	-0.679313	-0.548248	-0.273556	-0.320066	-0.0908279	-0.0142085	-0.208287	-0.219427	-0.191039	-0.141834	-0.322279	-0.2382	0.0442173	0.0384679	0.0188831	0.223375	0.0513178	0.136326	0.0944426	0.0944146	0.0489968	0.224689	0.324748	0.111507	0.0932161	0.221186	0.0952515	0.370662	0.43773	0.284171	0.315547	0.549347	-0.341908	-0.0176252	-0.124847	-0.290118	3	NA	Homoscedastic & Parametric	1.43825e-17	8.14308e-06	0.322959	0.408154	0.0977384	0.428628	0.457952
HORVU7Hr1G001010.2	-0.674961	-0.421395	-0.643891	-0.725412	-0.483249	-0.297459	-0.423745	-0.208984	-0.371529	-0.380512	-0.274067	-0.165169	-0.16799	-0.380373	-0.223679	0.148214	0.0774035	-0.138513	0.25543	0.173455	0.154587	0.387001	0.143943	0.134021	0.0747554	0.405736	0.00217669	0.0696992	0.238712	0.128213	0.141132	0.48433	0.192657	0.147137	0.486781	-0.485053	-0.0984426	-0.0609986	-0.233217	3	NA	Homoscedastic & Parametric	5.86763e-16	4.63259e-05	0.894679	0.584801	0.167607	0.391464	0.631694
HORVU4Hr1G000910.3	-0.390714	-0.684253	-0.24502	-0.241041	-0.224595	-0.142529	0.0816247	-0.17606	-0.0541455	-0.207082	-0.21933	0.0994448	0.0709572	-0.10826	-0.311824	0.0334825	0.0519527	-0.143854	0.187201	0.0542262	0.17279	0.105253	-0.0779156	0.142873	0.34361	0.418136	0.214702	0.147313	0.138937	0.123048	0.481093	0.722773	0.459342	0.344208	0.655618	-0.0724152	0.36905	-0.0142807	-0.290393	3	NA	Homoscedastic & Parametric	1.00431e-16	0.0307008	0.332035	0.24518	0.464909	0.595312	0.969028
HORVU3Hr1G073230.1;HORVU0Hr1G006930.3	-0.462778	-0.72839	-0.294797	-0.140979	-0.163831	-0.166298	-0.00430055	-0.0691159	-0.0927352	-0.181366	-0.320876	0.0987222	-0.100149	-0.236382	-0.372137	-0.0779946	-0.0677971	-0.175726	0.18309	-0.16257	0.049183	0.202511	-0.119515	0.103133	0.137452	0.24229	0.085162	0.186141	0.0398371	-0.0143357	0.269254	0.510258	0.148318	0.204895	0.618492	-0.240924	0.105862	-0.127659	-0.38167	3	NA	Homoscedastic & Parametric	4.52508e-17	0.142751	0.638205	0.197111	0.868997	0.469941	0.563455
HORVU2Hr1G067370.5	-0.592396	-0.837537	-0.404393	-0.358865	-0.311861	-0.21372	-0.124493	-0.16921	-0.102696	-0.171572	-0.396758	0.0820103	-0.0807995	-0.218836	-0.399066	0.0121451	-0.067661	-0.150247	0.234783	-0.0365337	0.0441034	0.282493	0.0894468	0.0956678	0.0973905	0.314978	0.139297	0.0462218	0.0449919	-0.0216748	0.257973	0.584256	0.0435891	0.190693	0.487098	-0.337113	0.118082	-0.121742	-0.424898	3	NA	Homoscedastic & Parametric	6.32714e-16	0.0465594	0.592319	0.195174	0.949876	0.462447	0.439466
HORVU4Hr1G084420.2	-0.510959	-0.608023	-0.511202	-0.487908	-0.411322	-0.375209	-0.149539	-0.0901924	-0.18711	-0.286972	-0.343272	0.0119911	-0.0126562	-0.176453	-0.334194	-0.102098	0.000567259	-0.149339	0.178785	-0.0436026	0.0332867	0.199044	-0.13443	0.0937693	0.137381	0.302735	0.297376	0.248445	0.12168	0.0734556	0.551675	0.505994	0.0280057	0.0545962	0.479038	-0.371951	0.00859891	-0.204356	-0.443524	3	NA	Homoscedastic & Parametric	1.51205e-15	0.0087393	0.617594	0.353035	0.870916	0.664765	0.939137
HORVU4Hr1G014130.1;HORVU4Hr1G074270.1;HORVU7Hr1G112740.4	-0.62238	-0.884985	-0.431025	-0.472269	-0.443243	-0.246416	-0.182428	-0.138599	-0.232367	-0.242199	-0.60949	0.11376	0.0373884	-0.212408	-0.359379	-0.0125081	-0.0138494	-0.219268	0.224686	-0.0275272	0.0828725	0.156779	0.0376371	0.149947	0.332907	0.43322	0.305237	0.310499	0.0904134	0.0142095	0.406785	0.596667	0.299496	0.15905	0.561557	-0.36698	0.0471116	-0.0688458	-0.443258	3	NA	Homoscedastic & Parametric	3.94962e-15	0.00964037	0.321966	0.106356	0.895184	0.446974	0.743547
HORVU4Hr1G075710.1	-0.51815	-0.690351	-0.416264	-0.445147	-0.423379	-0.303936	-0.20175	-0.151697	-0.289329	-0.281429	-0.605281	0.0375104	-0.000198396	-0.228109	-0.380138	-0.0779092	0.00890575	-0.198675	0.197537	0.141592	0.166229	0.378965	0.0830535	0.241948	0.158928	0.477029	0.318026	0.240179	0.2185	0.0173742	0.296272	0.629703	0.23925	0.224841	0.646898	-0.41786	0.0845882	-0.106927	-0.382676	3	NA	Homoscedastic & Parametric	2.99213e-15	0.0020134	0.384805	0.146996	0.970834	0.522012	0.950318
HORVU3Hr1G066430.3	-0.638318	-0.798025	-0.39809	-0.536491	-0.478376	-0.258675	-0.110444	-0.202574	-0.301709	-0.260003	-0.57041	0.0685733	0.0109626	-0.181127	-0.328647	-0.068078	-0.0637194	-0.258329	0.074368	0.0796549	0.0423278	0.294291	0.000442959	0.196212	0.200315	0.300066	0.238395	0.110563	0.142771	-0.100896	0.285009	0.493561	0.130366	0.219415	0.548478	-0.361888	0.0740879	-0.0437792	-0.471846	3	NA	Homoscedastic & Parametric	3.67253e-16	0.00386925	0.210744	0.157215	0.970405	0.571114	0.720746
HORVU1Hr1G038890.1	-0.569469	-0.714132	-0.344075	-0.375125	-0.435765	-0.316417	-0.115918	-0.165237	-0.327219	-0.393922	-0.617152	-0.0587045	-0.00967007	-0.300142	-0.411608	-0.127836	-0.0631878	-0.301111	0.181726	0.0333472	0.0139402	0.286321	-0.00520644	0.253675	0.243269	0.294576	0.250136	0.267593	0.154103	-0.0506693	0.0620478	0.494109	0.211562	0.252603	0.565663	-0.31899	0.0652168	-0.151636	-0.488702	3	NA	Homoscedastic & Parametric	5.30973e-16	0.00165359	0.256952	0.152972	0.997217	0.620907	0.727605
HORVU5Hr1G021730.2	-0.598476	-0.686646	-0.458453	-0.481377	-0.481771	-0.354987	-0.116914	-0.155058	-0.234173	-0.322442	-0.478353	-0.121792	-0.0946115	-0.348302	-0.355537	-0.111049	-0.0787655	-0.282378	0.179783	-0.0206071	-0.0391067	0.171352	0.100818	0.192042	0.103155	0.348749	0.190056	0.297768	0.240763	0.00717188	0.340748	0.619081	0.144456	0.236295	0.58964	-0.284302	0.113884	-0.197995	-0.421503	3	NA	Homoscedastic & Parametric	5.13701e-15	0.00139732	0.698095	0.530172	0.471776	0.814263	0.658692
HORVU6Hr1G083120.2	-0.583678	-0.781651	-0.404898	-0.539377	-0.396254	-0.374736	-0.0958374	-0.154461	-0.328407	-0.385731	-0.403845	0.0012319	-0.129478	-0.225792	-0.426144	-0.0353634	0.0401168	-0.228846	0.283373	0.182304	0.0670153	0.225849	-0.0238659	0.041274	0.20085	0.319685	0.290944	0.131407	0.165347	-0.0383333	0.457955	0.410654	0.232948	0.222048	0.428638	-0.461392	0.0186238	-0.0795137	-0.455009	3	NA	Homoscedastic & Parametric	4.78274e-17	0.000320318	0.36788	0.243061	0.884491	0.716411	0.756411
HORVU7Hr1G031850.4	-0.629994	-0.530952	-0.491049	-0.474141	-0.391566	-0.361265	-0.204243	-0.263226	-0.412525	-0.397599	-0.591299	-0.0221072	-0.103376	-0.30264	-0.444908	-0.0241111	-0.087507	0.00536618	0.117499	0.0785821	0.0628242	0.279649	-0.0907723	0.138695	0.0446347	0.313059	0.12823	0.0743324	0.104534	-0.0279799	0.681168	0.756805	0.0605408	0.154817	0.946592	-0.467967	-0.0350729	-0.168126	-0.448431	3	NA	Heteroscedastic & Non-parametric	8.23265e-17	0.00689853	0.244592	0.226945	0.988435	0.299267	0.568644
HORVU5Hr1G050560.1	-0.489919	-0.663543	-0.382043	-0.367611	-0.339163	-0.27993	-0.114743	-0.12968	-0.185099	-0.258962	-0.370261	0.0524022	-0.103269	-0.288136	-0.346218	-0.0374478	-0.117909	-0.17956	0.13705	-0.118166	-0.0280269	0.300926	-0.0783941	0.10054	0.22668	0.308286	0.141952	0.169755	0.0307416	-0.0884209	0.385338	0.661699	0.26476	0.363272	0.84913	-0.413969	0.0525379	-0.209984	-0.485186	3	NA	Homoscedastic & Non-parametric	1.80186e-17	0.0212623	0.572644	0.257598	0.746446	0.469783	0.821
HORVU5Hr1G113180.1	-0.468738	-0.679439	-0.379779	-0.394879	-0.365696	-0.263816	-0.0578154	-0.0412422	-0.136423	-0.223854	-0.35096	0.0384634	-0.0301268	-0.223882	-0.364294	-0.0419096	-0.0862888	-0.308056	0.117287	-0.139697	-0.0748714	0.222416	-0.0440689	0.0961473	0.0913518	0.295436	0.102652	0.146384	0.110109	-0.00159542	0.448287	0.519092	0.118963	0.344509	0.61417	-0.409323	0.0859233	-0.0737807	-0.404133	3	NA	Homoscedastic & Parametric	1.45126e-16	0.0463559	0.691295	0.294492	0.983611	0.499397	0.958941
HORVU5Hr1G036630.1	-0.601746	-0.82309	-0.449279	-0.478774	-0.325416	-0.409552	-0.205088	-0.15694	-0.189682	-0.358885	-0.463859	-0.0373041	-0.139749	-0.360742	-0.340377	-0.113537	-0.139652	-0.26957	0.201785	0.0116473	-0.0326578	0.334157	0.0208693	0.146502	0.141536	0.336885	0.129686	0.152552	0.247618	0.057617	0.711454	0.708724	0.213822	0.358955	0.890348	-0.644121	0.0127659	-0.198194	-0.558039	3	NA	Homoscedastic & Non-parametric	6.34518e-16	0.00436189	0.792096	0.267693	0.782852	0.861279	0.756235
HORVU4Hr1G019980.1	-0.611858	-0.639957	-0.443967	-0.444354	-0.265498	-0.313406	-0.186055	-0.15053	-0.243753	-0.314754	-0.406976	-0.178325	-0.172866	-0.30491	-0.299903	-0.0951494	-0.102789	-0.248057	0.170613	-0.0300886	-0.0471454	0.224124	-0.00100077	0.0949683	0.0408185	0.284012	0.151866	0.202057	0.186512	-0.0274582	0.453485	0.627016	0.0811096	0.17424	0.630545	-0.468243	-0.0264788	-0.163298	-0.40615	3	NA	Homoscedastic & Non-parametric	1.72777e-18	0.00116367	0.962055	0.600413	0.672982	0.877904	0.817638
HORVU5Hr1G084510.3	-0.375259	-0.79052	-0.429016	-0.563663	-0.554839	-0.388702	-0.0643474	-0.262624	-0.397702	-0.558841	-0.627496	-0.13315	-0.399687	-0.448533	-0.381252	0.0380013	-0.133103	-0.290524	0.0718122	-0.0756074	0.0673369	0.259414	-0.0671027	0.0965593	0.281043	0.307666	0.145708	0.173432	0.0341632	-0.0617845	0.587363	0.882317	0.296242	0.247315	0.812264	-0.522357	-0.00900494	-0.155776	-0.575497	3	NA	Heteroscedastic & Non-parametric	2.89819e-16	0.000923968	0.773899	0.751939	0.510106	0.693503	0.666959
HORVU3Hr1G072410.1	-0.170398	-0.408057	-0.391652	-0.25948	-0.131118	-0.219333	-0.103392	-0.100706	-0.224927	-0.358687	-0.383871	0.0880068	-0.122458	-0.215275	-0.313155	0.0299366	0.0443749	-0.0109124	0.190806	-0.036802	0.101688	0.254589	0.0555972	0.15148	0.300194	0.262494	0.125404	0.137234	0.159268	0.0280023	0.282424	0.236622	0.0803223	0.0886226	0.307735	-0.419321	0.0106377	-0.196198	-0.631707	3	X410	Homoscedastic & Parametric	3.49545e-20	0.000813364	0.810291	0.27332	0.269073	0.827288	0.871739
HORVU7Hr1G002060.1;HORVU0Hr1G006020.2;HORVU3Hr1G001140.5	-0.260167	-0.559459	-0.443168	-0.345395	-0.0999142	-0.346101	-0.317924	-0.351745	-0.302311	-0.414441	-0.377588	-0.0666466	-0.297002	-0.254747	-0.41385	0.132228	0.161155	0.114945	0.268748	0.186173	0.199054	0.443292	0.0840817	0.241375	0.154073	0.374895	0.194988	0.124537	0.262707	0.217481	0.349364	0.402081	0.00639166	0.164631	0.629818	-0.588484	-0.115055	-0.335773	-0.65126	3	X410	Homoscedastic & Parametric	2.39848e-17	3.52313e-05	0.961604	0.324466	0.330735	0.680967	0.647206
HORVU7Hr1G067280.1;HORVU5Hr1G034770.1	-0.399545	-0.637926	-0.403625	-0.419968	-0.211406	-0.275652	-0.282048	-0.195467	-0.326024	-0.416551	-0.459316	-0.140819	-0.223756	-0.270269	-0.265713	0.0496789	-0.00659925	-0.0804248	0.250419	0.263864	0.136551	0.298136	0.310325	0.149596	0.18461	0.342302	0.121823	0.122115	0.298153	0.137661	0.206589	0.499128	0.0691957	0.301793	0.625028	-0.424555	-0.086818	-0.392224	-0.62337	3	X410	Homoscedastic & Parametric	7.26396e-17	4.55792e-05	0.879413	0.490676	0.553634	0.851321	0.910848
HORVU3Hr1G026060.1;HORVU1Hr1G028820.1;HORVU0Hr1G003140.1;HORVU2Hr1G029090.3;HORVU7Hr1G044560.1;HORVU2Hr1G042010.2;HORVU2Hr1G041980.1	-0.454836	-0.589197	-0.304389	-0.348391	-0.244915	-0.292512	-0.281821	-0.169442	-0.338559	-0.473803	-0.606474	-0.0329337	-0.151427	-0.249124	-0.311697	0.0398856	-0.0874628	-0.178245	0.178775	0.142338	0.0587313	0.335233	0.107915	0.245335	0.144944	0.255303	0.140543	0.151237	0.195161	0.0534512	0.338532	0.350622	0.0899321	0.379589	0.685307	-0.319269	0.0716853	-0.188063	-0.590549	3	X410	Homoscedastic & Parametric	3.97583e-17	0.000939536	0.354994	0.141172	0.853753	0.651908	0.87879
HORVU7Hr1G027430.1	-0.395342	-0.445838	-0.455194	-0.236186	-0.0842807	-0.274492	-0.312404	-0.0971977	-0.224356	-0.332769	-0.428104	-0.0707206	-0.161396	-0.272642	-0.293163	0.00753822	0.0237719	-0.0432105	0.258137	0.0599064	-0.0493172	0.248434	0.0651955	0.057559	0.11284	0.24401	0.101983	0.0994775	0.22136	0.0131207	0.365647	0.298096	0.0979294	0.206043	0.632958	-0.471154	0.0680996	-0.233424	-0.545686	3	X410	Homoscedastic & Parametric	7.72626e-18	0.00182655	0.916063	0.340318	0.738205	0.956886	0.816698
HORVU7Hr1G054010.1	-0.36136	-0.576446	-0.21363	-0.288349	-0.181671	-0.0676444	-0.393747	-0.271733	-0.149742	-0.326054	-0.350699	0.0338009	-0.253481	-0.147371	-0.24354	0.110415	0.0913037	-0.0763922	0.179569	0.138702	-0.0133579	0.132785	0.111195	0.252682	0.156655	0.385313	0.0977549	0.0504067	0.0718388	0.0310612	0.181454	0.682943	0.0527667	0.258418	0.459456	-0.319319	-0.0133837	-0.37016	-0.535427	3	X151	Homoscedastic & Parametric	1.89603e-17	0.00574071	0.482416	0.245053	0.337167	0.546945	0.881772
HORVU5Hr1G092630.1	-0.401224	-0.809361	-0.217243	-0.26658	-0.311636	-0.154347	-0.439419	-0.172472	-0.132274	-0.326564	-0.408635	0.0410089	-0.144298	-0.142395	-0.249236	0.0263061	0.0660373	0.00418548	0.167309	0.118818	0.0650619	0.291632	0.0847706	0.226116	0.223436	0.378838	0.317852	-0.0184675	0.181987	0.0323271	0.215677	0.578254	0.149718	0.180273	0.585882	-0.159822	0.0964824	-0.487959	-0.531682	3	X151	Homoscedastic & Parametric	4.31614e-17	0.00226164	0.339378	0.0656045	0.436403	0.791858	0.739976
HORVU6Hr1G041750.3	-0.414773	-0.697005	-0.415833	-0.329757	-0.211529	-0.189585	-0.373641	-0.2586	-0.227338	-0.400239	-0.3765	-0.0532975	-0.122802	-0.170609	-0.344824	0.124193	0.106634	-0.0425798	0.122087	0.183458	0.191768	0.411382	0.155727	0.217506	0.143717	0.39598	0.141544	-0.0219949	0.233771	0.125055	0.388292	0.721777	0.123099	0.225086	0.583714	-0.344459	-0.0170913	-0.37401	-0.450362	3	X151	Homoscedastic & Non-parametric	2.69135e-19	0.000575884	0.396721	0.0969911	0.498043	0.39533	0.341655
HORVU4Hr1G070370.1	-0.467067	-0.871883	-0.312578	-0.309199	-0.307726	-0.255163	-0.510815	-0.263639	-0.314341	-0.624317	-0.601926	-0.0758056	-0.414978	-0.190815	-0.433687	0.0234241	0.0318149	-0.0413232	0.174923	0.216055	0.138996	0.318939	0.131766	0.221763	0.206694	0.399101	0.20037	0.0363564	0.246355	0.134755	0.403933	0.513615	0.182671	0.296989	0.741178	-0.361285	0.0118896	-0.478528	-0.638442	3	X151	Homoscedastic & Parametric	2.47579e-16	0.000144369	0.333094	0.0716295	0.529695	0.732815	0.602177
HORVU1Hr1G029870.1	-0.477983	-0.772466	-0.420591	-0.428743	-0.408008	-0.254267	-0.416977	-0.19678	-0.277373	-0.512303	-0.527004	0.00715819	-0.231114	-0.125778	-0.40135	0.0506883	0.0242056	0.01193	0.210228	0.211895	0.158387	0.319928	-0.0791583	0.0312592	0.26229	0.47303	-0.00612007	-0.0264308	0.249942	0.319063	0.438048	0.792547	0.204304	0.225509	0.665397	-0.249879	0.00161144	-0.449856	-0.654534	3	X151	Homoscedastic & Parametric	3.82691e-14	0.00833503	0.400917	0.175817	0.610934	0.449929	0.405587
HORVU5Hr1G104720.1	-0.362432	-0.69527	-0.158523	-0.270974	-0.410493	-0.236911	-0.319563	-0.394842	-0.383441	-0.699221	-0.680278	-0.0779591	-0.23786	-0.187569	-0.328188	0.151537	-0.0216098	-0.0159295	0.113485	0.34617	0.0967578	0.168672	0.0727394	0.178989	0.173398	0.330339	0.0635012	-0.0873658	0.0862781	0.0728977	0.23662	0.718612	0.12199	0.293983	0.476323	-0.186106	0.0848656	-0.443007	-0.782457	3	NA	Homoscedastic & Parametric	3.00014e-16	0.00395012	0.0782097	0.0841582	0.443707	0.37582	0.57818
HORVU7Hr1G080310.1	-0.334319	-0.514672	-0.285541	-0.212754	-0.198692	-0.186128	-0.119213	-0.00724712	-0.126814	-0.331573	-0.3901	0.0481764	-0.017838	-0.198871	-0.158866	-0.00738056	0.00831047	-0.241169	0.170803	-0.0323944	-0.0272148	0.127324	-0.0103656	0.0811692	0.13341	0.337637	0.0657594	0.0716741	0.150773	0.0653389	0.2243	0.434423	-0.0288377	0.137714	0.410832	-0.323939	0.133743	-0.245161	-0.479534	3	NA	Homoscedastic & Parametric	2.442e-18	0.0495347	0.558778	0.240182	0.495851	0.515716	0.808381
HORVU7Hr1G080630.1	-0.439128	-0.772168	-0.165482	-0.379965	-0.343678	-0.358088	-0.119786	-0.155512	-0.262292	-0.487325	-0.536693	-0.027259	-0.0259537	-0.198073	-0.220216	-0.0253445	-0.0505997	-0.157725	0.119299	0.0107328	-0.0969883	0.217641	0.0370373	0.239293	0.244794	0.341052	0.0928404	-0.0172343	0.173654	-0.0394204	0.335553	0.597345	0.0976922	0.27274	0.467085	-0.249895	0.119719	-0.258401	-0.656585	3	NA	Homoscedastic & Parametric	6.51817e-17	0.00906447	0.182739	0.0957897	0.548214	0.55698	0.984153
HORVU7Hr1G073720.5	-0.442073	-0.764168	-0.316148	-0.434732	-0.341502	-0.17321	-0.298506	-0.108246	-0.250303	-0.406746	-0.543208	0.000781278	-0.0849011	-0.211271	-0.274746	0.0511917	0.0518913	-0.151278	0.15633	0.0589798	0.0330235	0.251119	0.099049	0.194768	0.206579	0.490231	0.0944015	0.0654372	0.274667	0.11341	0.233353	0.684127	0.148093	0.234799	0.488729	-0.318658	0.150902	-0.256886	-0.498663	3	X59	Homoscedastic & Parametric	1.377e-15	0.00470924	0.473204	0.197022	0.94751	0.503272	0.837165
HORVU6Hr1G052600.3	-0.504552	-0.94224	-0.395768	-0.42196	-0.299632	-0.252471	-0.249065	-0.19749	-0.340448	-0.524522	-0.623006	-0.0183939	-0.139603	-0.364044	-0.425898	-0.0280524	0.0189236	-0.0843523	0.227901	0.133681	0.142098	0.367983	0.0661066	0.187411	0.200731	0.542069	0.230774	0.0978286	0.345878	0.104078	0.301298	0.738387	0.219466	0.217018	0.5914	-0.330624	0.0908821	-0.1725	-0.537638	3	X59	Homoscedastic & Parametric	4.19497e-14	0.000992195	0.507807	0.208178	0.809724	0.659732	0.885003
HORVU5Hr1G109910.2	-0.548002	-0.755841	-0.363613	-0.456865	-0.150672	-0.272989	-0.176952	-0.200844	-0.344084	-0.360383	-0.50268	-0.111382	-0.096682	-0.316986	-0.340666	0.0476633	0.0101635	-0.109504	0.287214	0.0392812	0.0305786	0.244785	0.0655821	0.135171	0.0464113	0.439751	0.152525	0.0999587	0.203822	0.0995703	0.284533	0.539179	0.0790524	0.167155	0.503915	-0.46847	0.0602414	-0.197697	-0.528813	3	X59	Homoscedastic & Parametric	4.57688e-16	0.00264351	0.702272	0.342181	0.987604	0.488621	0.668325
HORVU2Hr1G073150.1;HORVU0Hr1G004130.1	-0.55266	-0.584461	-0.411819	-0.484234	-0.378995	-0.20777	-0.194385	-0.135916	-0.321279	-0.44633	-0.543435	0.0421882	-0.214457	-0.269282	-0.324723	0.0614579	0.0841974	-0.214714	0.158777	0.0960995	0.0406675	0.359328	0.21472	0.145698	0.0643096	0.422754	0.121849	-0.012132	0.192818	0.117443	0.16841	0.649615	0.185188	0.256632	0.364089	-0.328207	0.0524642	-0.114688	-0.433118	3	X59	Homoscedastic & Parametric	6.63746e-16	0.00284595	0.458595	0.452854	0.658844	0.318331	0.862108
HORVU1Hr1G059960.2	-0.262379	-0.518647	-0.243946	-0.338064	-0.248943	-0.250016	-0.18208	-0.150753	-0.255837	-0.408396	-0.482107	0.0130546	-0.0613931	-0.236541	-0.269049	0.0746686	-0.0704765	-0.114994	0.180396	0.04913	0.00853599	0.144085	-0.0670004	0.112122	0.220751	0.25937	0.137326	0.0206258	0.131728	-0.0182928	0.197814	0.615466	0.0804074	0.188949	0.622086	-0.27799	0.20087	-0.291674	-0.499098	3	NA	Homoscedastic & Non-parametric	1.59168e-18	0.0102621	0.38597	0.135282	0.82504	0.65565	0.65748
HORVU1Hr1G021720.1	-0.459759	-0.683311	-0.417941	-0.436014	-0.413294	-0.348008	-0.188284	-0.233035	-0.305585	-0.451798	-0.584137	-0.146097	-0.12058	-0.25397	-0.416942	-0.0433231	-0.0637045	-0.186075	0.204628	0.156553	0.0425282	0.146744	-0.0276004	0.144898	0.168574	0.425706	0.228215	0.152812	0.270516	0.0271364	0.251611	0.725543	0.121696	0.194089	0.760116	-0.523206	0.0680496	-0.212073	-0.455958	3	NA	Homoscedastic & Non-parametric	4.94292e-17	0.000814269	0.415722	0.189225	0.956031	0.701499	0.8152
HORVU3Hr1G011460.1;HORVU3Hr1G085260.2	-0.377802	-0.771156	-0.42117	-0.325812	-0.309074	-0.169799	-0.299817	-0.243328	-0.344292	-0.353613	-0.452573	0.00437513	-0.144043	-0.272777	-0.370014	-0.0126333	0.0510585	-0.119528	0.101748	0.0996047	0.142226	0.0944999	-0.000627185	0.0958208	0.135968	0.359486	0.20651	0.0133194	0.14584	0.159839	0.561527	0.704012	0.192623	0.359405	0.660645	-0.455203	-0.0406229	-0.196221	-0.667531	3	NA	Homoscedastic & Non-parametric	7.82574e-19	0.00199465	0.348705	0.10918	0.400958	0.560566	0.383919
HORVU6Hr1G067870.1	-0.35515	-0.847295	-0.197419	-0.444385	-0.463177	-0.440295	-0.172165	-0.207416	-0.300956	-0.555286	-0.643394	-0.124888	-0.244672	-0.259379	-0.307816	0.114744	0.102657	-0.0891213	0.130248	0.179276	0.157773	-0.148088	0.0625174	0.342805	0.414682	0.474334	0.299777	0.0542822	0.21916	0.116251	0.550033	0.784206	0.319035	0.494471	0.747963	-0.25423	-0.060903	-0.395684	-0.74646	3	NA	Homoscedastic & Parametric	1.53252e-15	4.16251e-05	0.40877	0.164205	0.545168	0.598266	0.633315
HORVU1Hr1G088040.2	-0.526792	-0.62915	-0.345811	-0.516476	-0.419094	-0.301898	-0.407209	-0.190744	-0.353338	-0.549838	-0.58754	-0.141268	-0.194425	-0.280812	-0.353463	0.00707861	0.0240807	-0.00570251	0.0822829	0.0992223	0.114972	-0.0430274	0.131874	0.255952	0.0179554	0.25653	0.21989	-0.00156934	0.175123	0.0505674	0.366863	0.616717	0.160661	0.307904	0.666457	-0.310904	0.0348139	-0.314747	-0.65963	3	NA	Homoscedastic & Non-parametric	1.8656e-19	0.000137037	0.274225	0.12234	0.986324	0.772754	0.413214
HORVU2Hr1G019160.1	-0.50339	-0.608364	-0.292941	-0.405999	-0.353986	-0.247765	-0.18286	-0.0614738	-0.181043	-0.31486	-0.456483	-0.0567023	-0.0326239	-0.147237	-0.287085	0.0275826	-0.0505959	-0.113055	0.0852888	-0.00218205	0.114091	0.140782	0.0691196	0.160997	0.17148	0.230995	0.14206	-0.0639109	0.04851	-0.0617814	0.380719	0.675168	0.0980472	0.199054	0.502235	-0.277177	-0.0317667	-0.317362	-0.604258	3	NA	Homoscedastic & Parametric	1.73519e-17	0.0115941	0.441866	0.187788	0.390136	0.818361	0.726243
HORVU2Hr1G057430.1	-0.732986	-0.911844	-0.503792	-0.346166	-0.522886	-0.218581	-0.352652	-0.203954	-0.269471	-0.430426	-0.567837	-0.129885	-0.0787403	-0.15277	-0.439042	-0.0405058	-0.118277	-0.243339	0.0719256	0.0698155	0.0358524	0.263523	0.15292	0.358239	0.110456	0.265295	0.284795	-0.037688	0.0839263	-0.0970472	0.430693	0.645182	0.0190419	0.39573	0.555537	-0.435048	-0.0263225	-0.376663	-0.520115	3	NA	Homoscedastic & Parametric	2.27776e-15	0.00156133	0.223417	0.118152	0.549662	0.871302	0.925291
HORVU7Hr1G059320.3	-0.183422	-0.65828	-0.232305	-0.212036	-0.182781	-0.0956585	-0.144792	-0.203703	-0.139459	-0.313334	-0.415182	0.120137	-0.160646	-0.16582	-0.236505	-0.0336679	0.0202092	-0.354668	0.102396	0.0655488	0.12049	0.212653	0.0211447	0.161195	0.167747	0.310725	0.167062	-0.012573	0.110586	-0.0346942	0.187557	0.353394	0.264542	0.266808	0.559866	-0.158307	0.177863	-0.107488	-0.289709	3	NA	Homoscedastic & Parametric	6.23102e-19	0.0109204	0.468205	0.132807	0.716817	0.775002	0.929672
HORVU7Hr1G119330.1;HORVU3Hr1G093520.1;HORVU7Hr1G119390.1;HORVU4Hr1G004550.1;HORVU1Hr1G071550.1	-0.56571	-0.851063	-0.28239	-0.436159	-0.430868	-0.249862	-0.374043	-0.124826	-0.278116	-0.519164	-0.566704	0.120303	-0.0874417	-0.38093	-0.350302	-0.19032	0.0764728	-0.38706	0.100866	-0.0948047	-0.163117	0.262285	-0.099707	0.192735	0.0454904	0.370569	0.220503	-0.102667	0.116307	-0.190311	0.13932	0.592538	0.268428	0.254489	0.518855	-0.419772	-0.068632	-0.435714	-0.680905	3	NA	Homoscedastic & Parametric	2.09829e-15	0.0242194	0.246122	0.0941974	0.249265	0.415225	0.881804
HORVU2Hr1G025680.1	-0.310924	-0.674581	-0.588368	-0.53253	-0.407743	-0.541483	-0.61534	-0.222366	-0.33997	-0.528014	-0.760121	-0.0735196	-0.197219	-0.480109	-0.545327	-0.0827685	-0.0716018	0.143339	-0.109745	-0.219782	-0.168742	0.167985	-0.113235	0.126793	0.4262	0.322013	0.134891	-0.133048	0.0730136	-0.0202436	0.964563	0.927395	0.56794	0.521037	0.772066	-0.494291	-0.239438	-0.480909	-0.775625	3	NA	Homoscedastic & Non-parametric	1.02304e-17	0.000293286	0.987985	0.0299571	0.318471	0.708451	0.310907
HORVU2Hr1G046380.3	-0.730804	-0.900124	-0.572334	-0.40615	-0.427606	-0.158431	-0.356882	-0.36674	-0.472539	-0.441931	-0.596489	-0.0440633	-0.265545	-0.403399	-0.657943	0.0233151	-0.00827023	0.0327451	0.12063	-0.0670922	0.166238	0.214401	-0.150184	0.237737	0.316137	0.412098	0.233005	0.195476	0.103827	-0.0145446	0.522888	0.858604	0.489098	0.623739	1.03184	-0.325623	-0.0833849	-0.00103855	-0.569432	3	NA	Homoscedastic & Non-parametric	1.28146e-16	0.000567534	0.230368	0.157482	0.464343	0.307512	0.566695
HORVU6Hr1G094080.1;HORVU0Hr1G018090.1;HORVU0Hr1G018030.1	-0.598128	-0.695142	-0.412533	-0.481708	-0.47922	-0.262036	-0.0643647	-0.259236	-0.263748	-0.4945	-0.30823	-0.112182	-0.057491	-0.346699	-0.383438	-0.0691329	-0.0878192	-0.181096	0.228365	-0.0905086	0.16165	0.203045	0.0402799	0.113371	0.382501	0.32787	0.219495	0.0536886	0.0563703	0.000474938	0.326588	0.591126	0.522285	0.496089	0.782454	-0.196323	0.0909593	-0.194603	-0.472306	3	NA	Homoscedastic & Non-parametric	1.37003e-17	0.00139624	0.23995	0.635009	0.457619	0.478946	0.94202
HORVU2Hr1G085880.1	-0.672777	-0.747013	-0.559981	-0.616121	-0.557349	-0.426679	-0.277569	-0.271606	-0.412627	-0.414855	-0.615034	-0.133408	-0.128403	-0.381344	-0.270071	-0.0837861	-0.00501866	-0.10398	0.214871	-0.070417	0.0771316	0.311401	-0.0415712	0.207595	0.3591	0.398311	0.0998223	0.129556	0.12016	0.0499118	0.513959	0.751918	0.415574	0.551739	1.03719	-0.563686	-0.132956	-0.417579	-0.768162	3	NA	Homoscedastic & Non-parametric	2.16913e-16	0.000676187	0.400604	0.418207	0.461177	0.455375	0.848448
HORVU6Hr1G051930.3	-0.797986	-1.113	-0.704241	-0.792888	-0.81014	-0.507195	-0.36445	-0.480448	-0.507663	-0.591332	-0.729467	-0.0967928	-0.119294	-0.421285	-0.714045	-0.0922368	-0.198268	-0.294812	0.155648	-0.204964	0.0771816	0.213438	-0.183534	0.185724	0.414248	0.344075	0.216861	0.155006	0.0196133	-0.0281168	0.584803	1.02404	0.692955	0.844449	1.24698	-0.58118	-0.306117	-0.373112	-0.807986	3	NA	Homoscedastic & Non-parametric	1.50674e-14	0.00152385	0.135662	0.0901143	0.516076	0.264345	0.445575
HORVU4Hr1G016440.1	-0.812584	-0.674034	-0.653221	-0.754797	-0.778738	-0.475404	-0.358267	-0.424482	-0.779028	-0.484601	-0.650037	-0.166636	-0.183454	-0.566961	-0.488778	-0.014872	0.0684154	-0.221221	0.042163	0.0972921	0.269154	0.379316	0.0586843	0.251763	0.382885	0.505685	0.486604	-0.0627304	0.0357366	-0.123141	0.402983	0.829671	0.631484	0.574674	0.962848	-0.607265	-0.13904	-0.320332	-0.641735	3	NA	Homoscedastic & Non-parametric	1.04141e-15	2.69121e-05	0.150817	0.561006	0.825369	0.314064	0.629781
HORVU6Hr1G045130.3	-0.708169	-0.690551	-0.640417	-0.63793	-0.543808	-0.514984	-0.308175	-0.311715	-0.538566	-0.583764	-0.803058	-0.192002	-0.100392	-0.471762	-0.376105	0.0967222	-0.0672876	-0.335116	-0.0281239	-0.0484437	0.0898372	0.155018	-0.161753	0.169939	0.577451	0.438895	0.325774	0.0419494	0.077823	-0.256769	0.632751	0.954416	0.790489	0.396018	0.810585	-0.205834	0.0467458	-0.270421	-0.521918	3	NA	Homoscedastic & Non-parametric	5.11734e-16	7.95845e-05	0.30006	0.316213	0.243708	0.612389	0.460549
HORVU3Hr1G093400.1	-0.965796	-1.4535	-0.782505	-0.86354	-1.05504	-0.709481	-0.414467	-0.56167	-0.541355	-0.671483	-0.988645	-0.0326854	-0.0247682	-0.478114	-0.937994	-0.30212	-0.272918	-0.467535	-0.12757	-0.286181	0.00426059	0.0507197	-0.19354	0.240117	0.679473	0.321677	0.380311	0.120965	-0.0218554	-0.237649	0.922493	1.04004	1.04431	0.944017	0.97955	-0.153292	-0.0521905	-0.121274	-0.786301	3	NA	Homoscedastic & Non-parametric	2.50011e-12	0.0024909	0.0682726	0.0181125	0.470193	0.350394	0.393529
HORVU7Hr1G099650.1	-0.801871	-0.984468	-0.768686	-0.715914	-0.888127	-0.257398	-0.434472	-0.570575	-0.370202	-0.583712	-0.506177	-0.437029	-0.49725	-0.538748	-0.753073	-0.0668671	-0.244664	-0.175978	0.0948266	0.0825043	0.23455	-0.0943566	0.147454	0.352782	0.354504	0.231284	0.292687	0.269262	0.135537	-0.0134815	0.806578	0.837418	0.707513	0.710489	1.32243	-0.43668	-0.186341	-0.0457166	-0.512378	3	NA	Homoscedastic & Non-parametric	5.02341e-16	1.76431e-06	0.735553	0.877329	0.039276	0.59654	0.40441
HORVU1Hr1G095140.1	-0.646571	-0.853925	-0.441156	-0.632972	-0.598159	-0.496077	-0.377887	-0.561797	-0.415038	-0.339575	-0.598907	-0.286223	-0.473632	-0.352589	-0.579426	-0.217756	-0.206102	-0.193547	0.0928058	-0.0625497	-0.0494207	0.0706919	-0.177833	0.222568	0.0594554	0.283748	0.239172	0.0914656	0.0507879	-0.196866	0.651999	1.16659	0.475914	0.808803	1.05431	-0.540098	-0.160691	-0.43871	-0.77745	3	NA	Heteroscedastic & Non-parametric	1.90555e-17	0.000109235	0.530931	0.245287	0.814893	0.927124	0.970512
HORVU2Hr1G103520.7	-0.663411	-0.602862	-0.645521	-0.552817	-0.499495	-0.483702	-0.325397	-0.40534	-0.437887	-0.445128	-0.422599	-0.306182	-0.465152	-0.487814	-0.383474	-0.10709	-0.15118	-0.0918598	0.123878	-0.0458165	0.00605688	0.216335	-0.0725354	0.14741	-0.024687	0.250678	0.0859154	0.164989	0.104422	-0.0065666	1.02144	1.20064	0.458983	0.542186	1.0981	-0.567814	-0.177238	-0.329081	-0.577888	3	NA	Heteroscedastic & Non-parametric	9.59275e-19	2.46242e-05	0.997901	0.664677	0.461032	0.877139	0.49401
HORVU6Hr1G091860.1	-0.782762	-0.766048	-0.788019	-0.830875	-0.678203	-0.633042	-0.482887	-0.348405	-0.597952	-0.611748	-0.734944	-0.395924	-0.447218	-0.667867	-0.525033	-0.0558919	-0.0857939	-0.0500242	0.270643	-0.0721025	0.00278858	0.222056	0.00416731	0.0344914	0.221412	0.460772	0.25856	0.279157	0.246502	0.118165	0.944816	1.15463	0.474581	0.650417	1.12964	-0.790728	-0.2298	-0.311647	-0.863201	3	NA	Heteroscedastic & Non-parametric	3.6077e-16	5.61955e-06	0.887944	0.946507	0.506103	0.989518	0.829502
HORVU5Hr1G011460.1	-0.802933	-0.733039	-0.895372	-0.634218	-0.574983	-0.450466	-0.525582	-0.570748	-0.802584	-0.606135	-0.8896	-0.314262	-0.675702	-0.808525	-0.711832	-0.132267	-0.147728	-0.0262756	0.0518012	0.0717064	0.0244919	0.182648	0.0361731	-0.0749341	0.105973	0.247606	0.0405715	-0.0335565	0.0826576	-0.0599667	0.74388	1.04139	0.736867	0.584863	0.929727	-0.674712	-0.4374	-0.349226	-1.07768	3	NA	Homoscedastic & Non-parametric	3.85877e-18	1.37313e-06	0.887023	0.984825	0.718373	0.955383	0.860827
HORVU7Hr1G068630.1	-1.32585	-1.23213	-1.23159	-1.68985	-1.62843	-1.19312	-0.910468	-1.14862	-1.21679	-0.846513	-1.28097	-0.846467	-1.08174	-0.984544	-1.05586	-0.271544	-0.420008	-0.302027	-0.00829107	-0.172936	-0.0365486	0.110749	-0.21247	0.222092	0.229232	0.415256	0.37388	0.181011	0.0485088	-0.040747	1.61492	1.81993	1.18226	1.0622	1.55386	-1.06837	-0.833203	-0.447872	-1.25494	3	NA	Heteroscedastic & Non-parametric	2.97553e-13	2.18983e-07	0.674524	0.947295	0.140233	0.900378	0.482943
HORVU2Hr1G078350.3	-1.09889	-1.16244	-1.31173	-1.64332	-1.70161	-1.41184	-0.856013	-0.931397	-1.18831	-0.742331	-0.984468	-1.16692	-1.1236	-1.14487	-0.895506	-0.172113	-0.087704	-0.103263	0.0890736	0.0431593	0.0162188	0.168421	-0.18085	0.112459	-0.0355469	0.182853	0.0980311	0.101124	0.110383	0.0398682	1.12457	1.25522	0.755047	0.804892	1.24681	-0.911222	-0.645593	-0.701189	-0.958494	3	NA	Heteroscedastic & Non-parametric	1.32831e-16	3.5528e-10	0.197669	0.0975385	0.00157077	0.210701	0.0733735
HORVU4Hr1G047580.2	-0.667252	-0.722653	-0.526586	-0.661046	-0.574119	-0.298953	-0.371317	-0.271495	-0.568214	-0.492743	-0.727176	-0.0255858	-0.196395	-0.587005	-0.426149	0.00683334	0.152419	0.0152939	0.228398	0.0110537	0.0556273	0.383624	0.187785	0.258741	0.249221	0.503625	0.370876	0.0949871	0.295014	0.245372	0.853816	0.512201	0.488527	0.681665	0.736452	-0.612808	-0.17165	-0.222958	-0.766601	3	NA	Homoscedastic & Non-parametric	8.31402e-17	3.89448e-05	0.30439	0.343531	0.744228	0.38515	0.686313
HORVU3Hr1G100410.1	-0.501491	-0.59843	-0.404704	-0.663986	-0.636923	-0.395871	-0.329222	-0.333978	-0.539402	-0.479452	-0.61051	-0.351293	-0.35126	-0.522748	-0.404646	0.00824771	0.0654554	-0.0360984	0.305668	0.0111397	0.0441484	0.303825	0.201169	0.285109	0.204659	0.370642	0.18385	0.131352	0.246312	0.117138	0.346361	0.727548	0.306006	0.571147	0.833335	-0.535333	-0.122584	-0.365595	-0.738794	3	NA	Heteroscedastic & Non-parametric	3.12384e-19	1.10709e-06	0.691733	0.928089	0.776192	0.763256	0.817872
HORVU3Hr1G030980.2;HORVU4Hr1G012460.1;HORVU5Hr1G073730.1	-0.581328	-0.85583	-0.709608	-0.900409	-0.749137	-0.47682	-0.384314	-0.494524	-0.460849	-0.46286	-0.700985	-0.172414	-0.186656	-0.487696	-0.666116	0.0789907	0.0454516	-0.00206053	0.191152	0.0612606	0.123249	0.314812	-0.0471759	0.0937515	0.366705	0.508703	0.340856	0.235083	0.271392	0.106824	0.454006	0.600762	0.245552	0.34589	0.826501	-0.713934	-0.360982	-0.553786	-0.915547	3	NA	Homoscedastic & Non-parametric	1.1695e-16	1.00879e-05	0.519148	0.2645	0.249903	0.54107	0.752019
HORVU3Hr1G099550.1	-0.761146	-1.16107	-0.753704	-0.635873	-0.833335	-0.433287	-0.552956	-0.699498	-0.598441	-0.487262	-0.527826	-0.386685	-0.743349	-0.772249	-0.910688	0.0626546	-0.0221043	0.142328	0.211038	0.134057	0.0489431	0.409107	0.0262771	0.304592	0.168251	0.369028	0.222561	0.158025	0.176485	0.287233	0.784328	1.01482	0.369901	0.57468	1.01901	-0.779714	-0.547925	-0.465365	-0.961292	3	NA	Heteroscedastic & Non-parametric	6.22651e-17	3.32996e-07	0.873309	0.741215	0.852051	0.880255	0.943952
HORVU3Hr1G094330.1	-0.586625	-0.875655	-0.587225	-0.987095	-0.820337	-0.493285	-0.304848	-0.50012	-0.564876	-0.569763	-0.725074	-0.00986807	-0.249952	-0.518001	-0.711671	0.16801	-0.0836376	-0.0103507	0.217084	0.0456054	0.0119172	0.292004	0.218865	0.114757	0.345033	0.305497	0.198019	0.0284061	0.0337999	-0.0214699	0.478887	0.677905	-0.115088	0.243978	0.39642	-0.473023	-0.142897	-0.366947	-1.05774	3	NA	Homoscedastic & Parametric	2.09025e-12	0.000411254	0.384006	0.374454	0.841594	0.545438	0.789098
HORVU5Hr1G121800.4;HORVU5Hr1G121810.2	-1.32923	-1.5225	-1.20008	-1.40461	-1.70555	-0.92531	-0.792268	-0.903362	-1.83204	-1.35819	-1.13977	-0.560273	-0.732578	-0.946065	-1.38913	-0.111273	0.300572	0.532569	0.229496	0.160436	0.300573	0.585033	-0.319717	0.590291	0.556586	0.652564	0.591716	0.234076	-0.108612	-0.185705	0.6515	1.07641	1.02976	0.483801	0.686973	-1.30037	-1.04518	-0.826912	-1.84266	3	NA	Homoscedastic & Non-parametric	4.33706e-11	5.12803e-06	0.0401978	0.363538	0.235442	0.0558341	0.677889
HORVU4Hr1G086150.3	-0.417661	-0.725534	-0.352048	-0.498621	-0.240332	-0.292771	-0.274455	-0.337117	-0.201517	-0.340614	-0.426796	-0.0193754	-0.380944	-0.256763	-0.500564	0.132709	0.164743	-0.313816	0.17774	0.211723	0.309347	0.320437	0.0790925	0.0972185	0.350491	0.547532	0.0862151	0.0960968	0.250714	0.151999	0.112246	0.932617	0.40585	0.115422	0.469906	-0.529004	0.0844041	-0.19593	-0.32242	3	NA	Homoscedastic & Non-parametric	7.16191e-16	0.00113394	0.923683	0.299112	0.632381	0.743085	0.68502
HORVU2Hr1G109370.1	-0.403575	-0.532147	-0.259183	-0.234184	-0.0854197	-0.208977	-0.128151	-0.0431603	-0.114556	-0.188221	-0.285742	-0.00728817	-0.150235	-0.176294	-0.311843	0.152793	-0.115769	-0.101004	0.223869	0.140555	-0.0126916	0.260234	0.0613478	0.0278169	0.237474	0.295557	-0.0692339	0.0695416	0.149914	-0.115554	-0.106199	0.763813	-0.0302201	0.0811312	0.282244	-0.603482	0.00767782	-0.242517	-0.377086	3	NA	Homoscedastic & Non-parametric	1.00837e-16	0.0450923	0.992653	0.329848	0.36122	0.851786	0.737563
HORVU6Hr1G062440.1	-0.289026	-0.286863	-0.333913	-0.206567	0.038924	-0.0244302	0.0149496	-0.039648	-0.127713	-0.196629	-0.357788	0.0226213	0.182973	-0.275695	-0.182697	-0.0323622	-0.0873361	0.0896721	0.118837	0.0284405	0.0921684	0.153888	0.0172568	0.0155364	0.205668	0.0613245	0.0579972	-0.13744	-0.00568791	0.0407772	0.36718	0.462157	0.214719	0.28149	0.507986	-0.384575	-0.0601493	-0.140089	-0.445419	3	NA	Homoscedastic & Parametric	2.13286e-20	0.0606748	0.919689	0.592276	0.188029	0.630095	0.644045
HORVU5Hr1G024440.1	-0.328011	-0.399335	-0.226304	-0.415058	-0.228149	-0.00237626	0.034684	-0.000223251	-0.176145	-0.168694	-0.484041	0.222074	0.100182	-0.230994	-0.17733	0.060735	0.0195439	0.194338	0.198998	-0.0198906	0.178464	0.0462031	0.111433	0.218253	0.254641	0.174652	0.24566	0.0456592	-0.187429	-0.0307461	0.139748	0.353569	0.341202	0.283281	0.468664	-0.299711	-0.275413	-0.157407	-0.776625	3	NA	Homoscedastic & Parametric	6.33015e-18	0.063893	0.470812	0.40135	0.0511717	0.829321	0.460189
HORVU6Hr1G025270.1	-0.279353	-0.354726	-0.2368	0.0904916	-0.0604183	0.092432	-0.108058	-0.0972831	-0.100541	-0.222869	-0.266487	0.146117	-0.139161	-0.160172	-0.300114	0.0106203	-0.0386073	-0.101943	0.204823	0.0239156	0.0299186	-0.0313316	0.0536474	0.0371977	0.147698	0.222439	0.0854021	0.0861106	0.0647538	-0.0211727	0.254347	0.459024	0.187448	0.274605	0.544622	-0.299357	0.121331	-0.0967783	-0.410355	3	NA	Homoscedastic & Parametric	4.02013e-20	0.182704	0.329912	0.215304	0.325313	0.589579	0.547244
HORVU7Hr1G011840.2	-0.645066	-0.646346	-0.663459	0.317573	-0.0875102	-0.020201	-0.454026	-0.0723876	-0.64209	-0.659141	-0.863725	0.196991	-0.163575	-0.73364	-0.34734	0.0130282	0.0218302	0.0318089	0.166072	-0.0250296	0.148633	0.147501	0.084853	0.197908	0.167475	0.392841	0.109535	0.0345024	0.0297981	-0.0127863	0.339844	0.502375	0.319282	0.438222	0.789892	-0.481768	-0.0968358	0.0921629	-0.822048	3	NA	Homoscedastic & Parametric	1.12572e-12	0.144572	0.210876	0.147876	0.488505	0.301337	0.330599
HORVU1Hr1G085550.2;HORVU4Hr1G013230.1	-0.505833	-0.588072	-0.445929	-0.0512626	-0.297493	-0.320945	-0.189577	-0.109429	-0.248788	-0.163771	-0.643095	0.137253	-0.261627	-0.132753	-0.543773	-0.14813	-0.0401774	-0.0489776	-0.11439	-0.0121034	0.0730949	0.219846	-0.0769118	0.246339	0.176081	0.363715	0.0683474	-0.0626186	0.1156	0.14052	0.292727	0.659723	0.346887	0.393688	0.813945	-0.348173	-0.153661	-0.17019	-0.746476	3	NA	Homoscedastic & Non-parametric	3.38537e-17	0.0409866	0.324025	0.016479	0.135938	0.579982	0.178695
HORVU7Hr1G030690.1	-0.207149	-0.173892	-0.216374	-0.296837	-0.224238	-0.223176	-0.335513	-0.117529	-0.0506182	-0.374459	-0.207408	0.100503	0.00184162	-0.0495262	-0.201809	0.242255	0.00202436	-0.22821	0.131839	0.244491	0.136494	0.258952	0.09115	0.229108	0.410347	0.176164	0.274405	0.177698	0.210507	0.108418	0.150923	0.151086	0.264011	0.332044	0.563231	-0.431075	-0.00259377	-0.208079	-0.516843	3	NA	Homoscedastic & Parametric	4.40061e-20	0.000167212	0.294426	0.166258	0.0882005	0.862697	0.352667
HORVU5Hr1G091810.2	-0.204905	-0.334652	-0.172944	-0.304574	-0.311937	-0.139609	-0.402405	-0.187481	0.0783235	-0.16822	-0.233716	-0.0635944	-0.162415	0.0826117	-0.120591	0.186985	0.0922853	-0.0653297	0.0986104	0.0353948	0.0357329	0.232264	0.120526	0.173587	0.336993	0.303542	0.0111943	-0.057671	0.123838	0.0747451	0.212348	0.475696	0.193152	0.381226	0.643936	-0.513348	0.0719968	-0.428792	-0.659797	3	NA	Homoscedastic & Parametric	6.63507e-18	0.0181708	0.766374	0.306166	0.0807323	0.743418	0.912366
HORVU2Hr1G006010.1	-0.322182	-0.395671	-0.18027	-0.0679128	0.039736	-0.00869251	-0.496475	-0.264822	-0.142953	-0.514767	-0.420931	0.0219114	-0.444502	-0.0399054	-0.0441781	0.131814	0.122678	0.00987849	0.180446	0.0449934	-0.126251	0.150178	0.131402	0.0623942	0.0770747	0.16497	-0.122553	-0.148903	0.295393	0.189414	0.307312	0.270317	0.0697502	0.421134	0.757634	-0.586331	0.0359728	-0.313801	-0.604117	3	NA	Homoscedastic & Non-parametric	2.58573e-16	0.116261	0.465296	0.342263	0.142375	0.53787	0.450177
HORVU3Hr1G084310.1	-0.348965	-0.309677	-0.310301	-0.4043	-0.187013	-0.22171	-0.317709	-0.168389	0.0140065	-0.332323	-0.236387	0.0594158	-0.190931	-0.0660495	-0.0319957	0.341144	0.197104	-0.0806058	0.259763	0.194554	-0.03264	0.339181	0.222973	0.262813	0.149165	0.323669	-0.0208207	-0.0939294	0.187491	0.144412	0.301497	0.166895	-0.202305	0.330665	0.39008	-0.420625	0.111647	-0.400128	-0.518806	3	X352	Homoscedastic & Parametric	1.57933e-16	0.00659278	0.843653	0.720182	0.431819	0.51291	0.938956
HORVU2Hr1G063880.1	-0.32558	-0.383635	-0.226494	-0.315005	-0.0318062	-0.117597	-0.179613	-0.106577	-0.0955014	-0.459825	-0.319988	-0.120837	-0.181653	-0.0426884	-0.0273664	0.190045	0.0788847	0.0647255	0.23842	0.0801765	0.0307875	0.291349	0.249597	0.109291	0.156337	0.281589	-0.163894	-0.191432	0.0594983	0.0222733	0.320298	0.249041	-0.132437	0.299494	0.533229	-0.468492	0.035108	-0.589298	-0.563273	3	X352	Homoscedastic & Parametric	1.23345e-16	0.0611918	0.872629	0.843502	0.176387	0.483074	0.535739
HORVU4Hr1G077250.1	-0.222257	-0.430315	-0.195158	-0.323456	-0.128138	-0.116462	-0.266628	0.0136541	-0.116141	-0.241734	-0.375693	-0.0531062	-0.190212	-0.203998	-0.134617	0.0635001	0.122348	-0.012312	0.270041	-0.0195729	-0.119838	0.207347	0.097457	0.0186396	-0.0128148	0.328885	-0.00317787	-0.0601256	0.226392	0.129613	0.186612	0.349762	-0.0999821	0.253817	0.49515	-0.40517	0.0175892	-0.427447	-0.560759	3	NA	Homoscedastic & Parametric	5.73368e-18	0.031115	0.626853	0.558358	0.287689	0.72031	0.50698
HORVU5Hr1G038920.1	-0.309659	-0.611452	-0.242644	-0.237617	-0.166516	-0.164665	-0.602941	-0.142079	-0.178099	-0.408486	-0.325893	-0.09847	-0.37102	-0.0311126	-0.104878	0.273213	0.192804	0.0667017	0.217762	0.225635	0.089968	0.320101	0.282481	0.318394	-0.0142722	0.269391	0.0745924	-0.0315159	0.217855	0.126132	0.289578	0.439604	-0.282229	0.24907	0.486528	-0.537866	-0.137318	-0.650043	-0.820535	3	X91	Homoscedastic & Parametric	3.29968e-16	0.00382837	0.730996	0.270117	0.04585	0.598623	0.475417
HORVU6Hr1G058560.1	-0.353505	-0.62445	-0.28407	-0.378899	-0.338378	-0.29822	-0.519606	-0.0854511	-0.296528	-0.47007	-0.442363	-0.201335	-0.185097	-0.121044	-0.126405	0.0673008	0.0608443	-0.0251118	0.180492	0.190258	0.0775451	0.345058	0.0787326	0.208075	0.0477242	0.211995	0.157412	0.00780338	0.293313	0.164425	0.293785	0.555174	-0.154372	0.141918	0.548852	-0.536487	-0.113395	-0.597096	-0.76646	3	X91	Homoscedastic & Parametric	3.5411e-16	0.000982283	0.59738	0.257115	0.107992	0.911883	0.8209
HORVU3Hr1G111760.2	-0.473906	-0.358361	-0.226363	-0.399931	-0.255293	-0.227369	-0.473216	-0.2906	-0.242192	-0.485763	-0.468622	-0.174044	-0.416057	-0.155866	-0.0913052	0.265313	0.111862	0.256271	0.261498	0.337372	-0.169548	0.308025	0.320475	0.201843	0.220955	0.338795	0.0374922	-0.00125146	0.245076	0.00620553	0.275941	0.62782	-0.127528	0.450267	0.522493	-0.350416	0.03198	-0.452325	-0.681102	3	NA	Homoscedastic & Parametric	1.13674e-14	0.000576982	0.625958	0.7635	0.671982	0.737769	0.837862
HORVU5Hr1G108990.2	-0.366779	-0.675691	-0.437325	-0.283073	-0.214342	-0.297525	-0.480522	-0.438717	-0.178016	-0.553052	-0.399119	-0.215849	-0.578977	-0.16948	-0.181548	0.376776	0.201247	0.315696	0.235692	0.338985	0.0685256	0.261124	0.254322	0.362837	0.294408	0.144488	-0.0520105	-0.291692	0.102568	0.0719672	0.507746	0.590585	-0.0300228	0.355505	0.671951	-0.493886	-0.0895027	-0.659126	-0.809186	3	NA	Homoscedastic & Parametric	1.75722e-13	0.000347242	0.932084	0.690637	0.40099	0.750318	0.89898
HORVU2Hr1G100970.4	-0.40864	-0.435181	-0.308587	-0.205501	-0.176344	-0.205323	-0.473403	-0.366516	-0.309945	-0.612356	-0.473909	-0.12638	-0.598438	-0.241044	-0.185189	0.112471	0.147077	-0.0393633	0.209712	0.297332	-0.00562947	0.26162	0.0984337	0.163286	-0.0200065	0.170946	-0.00820882	-0.0637114	0.109094	0.0621003	0.595427	0.554271	-0.187008	0.385965	0.691462	-0.464218	-0.197034	-0.55544	-0.936106	3	NA	Homoscedastic & Parametric	1.96306e-14	0.00490999	0.610386	0.69593	0.202776	0.64494	0.99602
HORVU5Hr1G119700.1	-0.165019	-0.715496	0.000365245	-0.227874	-0.279828	-0.0725465	-0.441776	-0.214724	-0.12554	-0.59721	-0.545846	-0.229383	-0.283739	-0.0561782	-0.278739	0.28724	0.180195	-0.00879373	0.115712	0.177339	0.0659647	0.272915	0.150477	0.323706	0.108962	0.322177	0.0586971	-0.11311	0.23754	0.190538	0.299735	0.441901	-0.112393	0.243401	0.573309	-0.31218	-0.0265702	-0.52235	-0.388038	3	NA	Homoscedastic & Parametric	8.47816e-17	0.00445459	0.394268	0.0875493	0.303418	0.482253	0.495175
HORVU1Hr1G073670.1;HORVU1Hr1G074340.1	-0.545914	-1.20862	-0.318421	-0.43923	-0.318884	-0.608735	-0.85402	-0.521556	-0.559768	-0.932941	-0.826312	-0.514723	-1.05415	-0.299726	-0.944249	0.307696	-0.15125	-0.0764591	0.195374	0.464354	0.300805	0.261146	0.1221	0.0700325	-0.0833021	0.139624	-0.0436651	-0.176072	0.119199	0.173074	0.795211	0.674349	-0.203328	0.433323	0.804664	-0.440906	-0.419638	-0.790753	-0.939185	3	NA	Homoscedastic & Non-parametric	3.19869e-14	0.000554081	0.693703	0.023577	0.439933	0.815816	0.0375738
HORVU2Hr1G018820.1	-0.446478	-0.265551	-0.206708	-0.354916	-0.371341	-0.344395	-0.255662	-0.175498	-0.229636	-0.546066	-0.455745	-0.120486	-0.219916	-0.256912	-0.10419	0.0621274	0.083918	0.14784	0.285319	0.0862307	-0.0112468	0.117135	0.231421	0.219161	0.16137	0.32466	0.250052	-0.0106538	0.19915	0.0324748	0.291034	0.379541	0.0879597	0.143677	0.414133	-0.0859	0.166337	-0.263277	-0.569152	3	NA	Homoscedastic & Parametric	9.87905e-19	8.93627e-05	0.297536	0.643467	0.552317	0.848288	0.96718
HORVU5Hr1G045620.1	-0.372608	-0.670561	-0.29246	-0.419787	-0.28105	-0.326114	-0.224924	-0.180617	-0.491817	-0.768188	-0.620207	-0.242248	-0.290321	-0.133609	-0.103568	0.1402	0.0649098	-0.130606	0.130971	0.233018	0.139631	0.217173	0.0944447	0.165379	0.00250293	0.238584	0.309918	0	0.153376	0.0797187	0.251393	0.385633	0.0457978	0.260557	0.439525	-0.276251	-0.0286386	-0.663858	-0.792026	3	NA	Homoscedastic & Parametric	4.03381e-17	0.00014164	0.305901	0.434581	0.324208	0.683471	0.778408
HORVU7Hr1G028050.5;HORVU7Hr1G014140.4	-0.217945	-0.433945	-0.299265	-0.260425	-0.290394	-0.246132	-0.276824	-0.278884	-0.417913	-0.338289	-0.564603	-0.0729475	-0.0564089	-0.243271	-0.374293	0.0264397	0.0637046	0.303418	0.241359	0.210535	0.095318	0.0765344	0.0311572	0.18774	0.0459488	0.291768	0.13989	-0.0472459	0.161122	0.0304499	0.0472882	0.527118	-0.000546492	0.131643	0.532645	-0.416524	0.00624457	-0.263509	-0.668184	3	NA	Homoscedastic & Parametric	1.71478e-17	0.00333729	0.320071	0.13761	0.321025	0.807352	0.307829
HORVU7Hr1G063280.1;HORVU5Hr1G054100.1;HORVU2Hr1G086470.1;HORVU2Hr1G086480.1;HORVU5Hr1G054090.1;HORVU5Hr1G054130.1;HORVU5Hr1G054120.1;HORVU5Hr1G054110.2;HORVU2Hr1G086450.1	-0.376266	-0.840855	-0.370939	-0.43914	-0.361805	-0.33841	-0.453749	-0.513886	-0.375371	-0.68854	-0.714639	-0.158687	-0.298595	-0.302145	-0.476156	0.314233	0.172175	-0.0374836	0.234572	0.398299	0.400504	0.294916	0.102686	0.1949	0.22458	0.387853	0.2406	-0.0241157	0.177514	0.0985094	0.0282617	0.441153	0.272791	0.133877	0.457918	-0.37585	0.0251402	-0.362307	-0.660425	3	NA	Homoscedastic & Non-parametric	1.58829e-18	2.05555e-05	0.185627	0.0336241	0.920406	0.292705	0.152071
HORVU5Hr1G076700.2	-0.342174	-0.556364	-0.377883	-0.525095	-0.312838	-0.346191	-0.294767	-0.267687	-0.366814	-0.48996	-0.439304	-0.312948	-0.139971	-0.349746	-0.24744	0.0277069	0.0133291	0.140878	0.257478	0.367134	0.0390668	0.393012	0.23648	0.0427665	0.0304664	0.278528	0.0181008	-0.058317	0.349047	0.121089	0.126859	0.261584	-0.0157074	0.11408	0.458329	-0.456766	-0.0607172	-0.252125	-0.566117	3	NA	Homoscedastic & Non-parametric	1.64563e-19	2.61057e-05	0.857035	0.715219	0.888592	0.984629	0.80542
HORVU3Hr1G015190.2	-0.352969	-0.945986	-0.354603	-0.678408	-0.311592	-0.171582	-0.753453	-0.499661	-0.449137	-0.733857	-0.679689	-0.158394	-0.63743	-0.27285	-0.412905	0.223102	0.188795	0.0466819	0.296013	0.275078	0.144344	0.381838	0.340793	0.347189	0.117752	0.594389	0.186953	0.0991383	0.503633	0.324491	0.261897	0.741577	-0.0739504	0.389	0.628672	-0.573728	-0.180596	-0.630695	-0.794867	3	NA	Homoscedastic & Parametric	6.37614e-12	4.97133e-05	0.77535	0.431448	0.571442	0.766595	0.823105
HORVU6Hr1G070420.2	-0.505428	-0.806791	-0.427373	-0.635281	-0.41074	-0.325123	-0.477552	-0.534657	-0.687221	-0.881511	-1.00726	-0.111265	-0.269358	-0.220236	-0.464482	0.0968864	0.136062	0.100404	0.368903	0.306457	-0.181359	0.470652	0.300993	0.355892	0.332929	0.502195	0.146294	0.0627218	0.384164	0.172024	0.112233	0.39765	-0.050542	0.311753	0.669648	-0.62022	-0.143121	-0.41218	-0.885738	3	NA	Homoscedastic & Parametric	3.81836e-13	6.36505e-05	0.154655	0.154333	0.387189	0.445254	0.873876
HORVU1Hr1G039790.5	-0.279608	-0.188457	-0.278874	-0.343988	-0.157592	-0.0791508	-0.0954596	-0.118787	-0.179282	-0.370315	-0.324764	0.13022	-0.0118978	-0.101443	-0.179861	0.105565	0.172535	-0.140835	0.26526	0.325015	0.198351	0.246683	-0.0813797	0.0685146	0.0932633	0.0815668	-0.0768215	0.0228048	0.012802	0.0466389	0.0162792	0.33136	0.173058	0.237462	0.498175	-0.0915883	0.185225	-0.25621	-0.574553	3	NA	Homoscedastic & Parametric	1.03803e-17	0.0709455	0.377819	0.61435	0.705819	0.377122	0.85297
HORVU6Hr1G048390.2	-0.649704	-0.47345	-0.562972	-0.429279	0.148463	-0.346484	-0.478867	-0.305968	-0.462895	-0.606716	-0.717293	0.224693	0.0201697	-0.289038	-0.426504	-0.115601	-0.135317	-0.0647362	0.336542	-0.170635	-0.142724	0.129142	-0.116474	0.0812897	0.164231	0.256643	0.0167835	0.0686887	0.128381	-0.108193	0.227179	0.809367	0.298697	0.522907	0.858151	-0.0902429	0.0824588	-0.667772	-0.344777	3	NA	Homoscedastic & Non-parametric	7.75185e-14	0.170299	0.306859	0.0685064	0.769645	0.425017	0.210876
HORVU7Hr1G039850.4	-0.417647	-0.455365	-0.182581	-0.097196	-0.204133	-0.250927	0.0130521	-0.0179248	-0.0180907	-0.324965	-0.196177	0.0924863	-0.188573	-0.281434	-0.164696	-0.0559505	-0.0405914	-0.127131	0.222374	-0.115283	-0.0101553	0.210363	0.081578	0.0368581	0.121135	0.247322	0.00876866	0.167852	0.0773856	0.034847	0.394878	0.532036	0.216896	0.317623	0.623336	-0.106252	0.419793	0.126711	-0.242955	3	NA	Homoscedastic & Parametric	2.81609e-17	0.185761	0.617382	0.535488	0.106311	0.364337	0.583175
HORVU4Hr1G066270.1	-0.418372	-0.507129	-0.245447	-0.296225	-0.2412	-0.373085	-0.200865	-0.112009	-0.127153	-0.423895	-0.284218	-0.0827111	-0.282132	-0.369184	-0.309179	-0.110466	-0.101396	-0.140289	0.234313	0.0630853	-0.228457	0.264284	-0.0955602	-0.157224	-0.0888434	0.264483	-0.0713771	0.046031	0.23251	0.0729368	0.335362	0.425885	-0.025346	0.27509	0.635377	-0.145625	0.474067	0.161421	0.051817	3	NA	Homoscedastic & Non-parametric	6.65552e-18	0.0340187	0.956591	0.491554	0.00213918	0.631506	0.689809
HORVU2Hr1G124980.2	-0.532601	-0.692137	-0.657928	-0.516313	-0.538229	-0.337766	-0.395118	-0.410976	-0.525371	-0.478095	-0.437498	-0.241556	-0.55488	-0.577047	-0.470845	-0.132527	0.151372	0.212821	0.210693	-0.117789	0.0452684	0.067466	-0.169908	-0.0913557	0.0308047	0.124437	-0.200987	-0.112871	0.163529	0.204399	0.721974	0.713331	0.338103	0.550192	0.962526	-0.219349	0.431255	-0.0390527	-0.286035	3	NA	Homoscedastic & Non-parametric	7.91279e-18	0.000397153	0.958013	0.725629	0.000268831	0.789133	0.66517
HORVU3Hr1G091680.1	-0.55552	-0.639401	-0.349963	-0.350484	-0.40917	-0.262334	-0.263869	-0.483233	-0.586338	-0.520247	-0.37495	-0.283565	-0.402011	-0.412322	-0.625844	-0.139454	-0.167099	-0.0752391	0.266672	-0.0960794	0.00170197	0.171386	0.0798622	0.0500564	-0.0426627	0.130652	0.0168928	0.0650333	0.0271951	0.100906	0.424605	0.732546	0.0744577	0.300847	0.596373	-0.328131	-0.0691131	0.17621	-0.640018	3	NA	Heteroscedastic & Non-parametric	2.87448e-18	0.00375094	0.184042	0.56309	0.14432	0.225103	0.35462
HORVU2Hr1G056740.1	-0.249672	-0.690543	-0.498487	-0.41228	-0.26812	-0.310299	-0.0784495	-0.234303	-0.348115	-0.170833	-0.528798	-0.0202208	-0.0132537	-0.325067	-0.421348	-0.0697146	-0.0369829	-0.148619	0.180409	0.158046	0.208341	0.259034	0.0407461	0.287942	-0.118272	0.301526	0.0568487	-0.0319168	-0.189331	-0.323578	0.158793	0.719794	0.44965	0.416327	0.436101	-0.130331	0.189455	-0.0213652	-0.248875	3	NA	Homoscedastic & Parametric	7.14334e-15	0.0365447	0.928468	0.335114	0.186678	0.746491	0.666707
HORVU6Hr1G011910.30	-0.505392	-0.564508	-0.455408	-0.670824	-0.560202	-0.155553	-0.350507	-0.219306	-0.0821267	-0.36524	-0.401565	0.0534182	0.00961628	-0.278865	-0.0837436	0.082403	-0.0157125	-0.0253556	0.200975	0.0285619	0.250308	0.213089	0.00479978	0.144158	-0.00717729	0.179161	0.10712	-0.275061	-0.0960852	-0.153478	0.443565	0.751676	0.713042	0.663756	0.800752	-0.00986746	0.267048	-0.20876	-0.494724	3	NA	Homoscedastic & Non-parametric	3.42259e-16	0.0420134	0.484659	0.660293	0.263887	0.554333	0.643403
HORVU6Hr1G021630.5	-0.304099	-0.61199	-0.210945	-0.366498	-0.369413	-0.181412	-0.193199	-0.11296	0.0230458	-0.326535	-0.277804	0.149385	0.0405753	-0.0223903	-0.226373	0.0923846	0.0895428	-0.148585	0.0588639	0.0304449	0.0634007	0.166682	-0.0109494	0.130654	0.224767	0.374952	0.0595772	-0.0403566	0.00351671	-0.139247	0.185949	0.525145	0.136561	0.168797	0.61956	-0.0915267	0.420104	-0.131067	-0.221275	3	NA	Homoscedastic & Parametric	1.86463e-16	0.190061	0.307375	0.123055	0.51266	0.29944	0.702064
HORVU2Hr1G082860.3	-0.456838	-0.606013	-0.286638	-0.428557	-0.419478	-0.219087	-0.217239	-0.190895	-0.108665	-0.154063	-0.331765	0.134885	0.104051	-0.141256	-0.320552	-0.0203161	0.00725522	-0.152608	0.0536258	-0.0521619	0.02755	0.273511	0.0898143	0.191452	0.279844	0.39158	0.0660031	-0.0589167	-0.0244508	-0.132618	0.316765	0.646617	0.255853	0.244692	0.608823	-0.0969643	0.32811	0.00498541	-0.30685	3	NA	Homoscedastic & Parametric	5.17333e-16	0.108479	0.287354	0.127661	0.433715	0.341809	0.678703
HORVU1Hr1G089280.1	-0.735737	-0.544341	-0.273469	-0.511914	-0.565649	-0.388341	-0.149259	-0.207522	-0.182731	-0.165	-0.363567	0.0627471	0.0472954	-0.286514	-0.197556	-0.111128	0.0242105	-0.0790773	0.154574	-0.0326522	-0.0124022	0.0694753	-0.0614764	0.0402543	0.3172	0.265871	-0.0315201	-0.0887674	-0.131333	-0.25283	0.253116	0.563852	0.331327	0.170015	0.611124	-0.148406	0.304702	-0.190398	-0.509387	3	NA	Homoscedastic & Parametric	6.14629e-15	0.119236	0.262058	0.348883	0.647557	0.432949	0.837211
HORVU5Hr1G081590.1;HORVU5Hr1G101600.1;HORVU7Hr1G104300.1;HORVU2Hr1G045920.1	-0.835931	-0.661696	-0.432658	-0.550634	-0.589155	-0.339095	-0.25466	-0.219953	-0.31775	-0.304679	-0.645074	0.0933539	0.0436211	-0.294482	-0.29437	-0.167308	0.0575264	0.0587696	0.103374	0.169949	0.0866641	0.0560023	0.0343471	0.141025	-0.0322226	0.374466	0.127243	-0.297239	-0.127306	-0.281913	0.455572	0.819563	0.0389498	0.0845103	0.308553	-0.222465	0.364336	-0.0342858	-0.293245	3	NA	Homoscedastic & Non-parametric	3.42284e-14	0.0998896	0.15008	0.163894	0.275468	0.314833	0.36789
HORVU6Hr1G037000.1	-0.443545	-1	-0.390845	-0.80768	-0.638177	-0.311341	-0.129752	-0.0697627	-0.110831	-0.432367	-0.430124	-0.11069	-0.0161273	-0.0904449	-0.562288	-0.102438	-0.071461	-0.0181656	-0.0363983	-0.212502	-0.0823301	0.0290907	-0.0142308	-0.0239355	0.0379375	0.135427	-0.179797	-0.269113	-0.0372691	-0.181574	0.304786	0.534568	0.278771	0.359593	0.670223	-0.0821241	0.214983	0.224539	-0.353867	3	NA	Homoscedastic & Parametric	6.96846e-15	0.211802	0.657372	0.206412	0.0596412	0.631157	0.328341
HORVU6Hr1G005390.1;HORVU6Hr1G090070.1	-0.533579	-0.603181	-0.471135	-0.501113	-0.432843	-0.178756	-0.216102	-0.243676	-0.321313	-0.421198	-0.569032	0.0651033	0.0134592	-0.364095	-0.307009	-0.0398692	0.0464634	-0.259139	0.0723291	0.0435595	0.188976	-0.161605	0.0286988	0.18934	-0.00516666	0.355562	0.163259	0.0214848	-0.0562673	-0.121679	0.158713	0.335284	0.127235	0.224438	0.0511572	-0.0640004	0.409142	0.192547	-0.305944	3	NA	Homoscedastic & Parametric	1.19999e-15	0.0207126	0.28939	0.361682	0.0222767	0.51004	0.872641
HORVU1Hr1G059570.2	-1.19391	-0.711614	-0.293055	-0.895067	-0.719699	-0.240195	-0.615907	-0.302491	-0.414278	-0.917066	-0.641624	-0.310844	-0.236511	-0.288106	-0.543982	0.152523	0.0588121	-0.240156	-0.294543	0.334806	-0.012394	0.282106	-0.069618	0.0454031	-0.11019	0.349997	-0.363067	0.154398	-0.197971	-0.332722	0.525835	0.928847	-0.0661729	0.788403	0.684886	-0.315495	0.212231	0.173235	-0.59134	3	NA	Homoscedastic & Non-parametric	2.98299e-13	0.0510952	0.101067	0.365713	0.110658	0.0360153	0.849639
HORVU2Hr1G112860.1	-0.319173	-0.800548	-0.242849	-0.357881	-0.288968	-0.15424	0.175868	-0.175918	-0.308145	-0.463516	-0.365141	0.284848	0.12612	-0.196701	-0.426799	-0.012735	-0.0596765	-0.139052	0.140661	-0.0420046	0.212242	0.196399	-0.202148	0.235024	0.399389	0.301217	0.079972	0.0325055	0.154841	-0.0676992	-0.0279162	0.116189	0.134431	0.0151528	0.463813	-0.0498433	0.305814	-0.0718266	-0.377748	3	NA	Homoscedastic & Parametric	4.50715e-15	0.0940343	0.119382	0.163978	0.851076	0.482036	0.953626
HORVU3Hr1G063690.10	-0.446347	-0.876556	-0.281965	-0.101054	-0.154115	-0.0529096	-0.0653262	-0.10894	-0.00556093	-0.227247	-0.303436	0.257179	0.0816658	-0.189077	-0.27954	0.0773794	-0.0914159	-0.144007	0.13376	0.0519595	0.0425513	0.155541	-0.00290909	0.181261	0.390442	0.263398	-0.0231638	0.0995536	-0.0705312	-0.0269774	0.0132426	0.0573175	0.237963	0.150313	0.507187	-0.20447	0.0945177	-0.0500309	-0.363772	3	X1463	Homoscedastic & Parametric	5.68563e-17	0.210571	0.262599	0.0681905	0.520425	0.46392	0.522757
HORVU6Hr1G005370.9	-0.357861	-1.00241	-0.409498	-0.343604	-0.293731	-0.112502	-0.0760903	-0.159733	0.000548005	-0.150718	-0.203736	0.113467	-0.325784	-0.151327	-0.276062	0.0517445	-0.0117601	-0.111007	0.221272	-0.0402243	0.105762	0.0749804	0.0244569	0.00354416	0.166831	0.222299	-0.0793929	0.0346374	-0.00126325	-0.0959015	-0.0670681	0.0430226	0.103275	0.0193576	0.45706	-0.272983	0.170992	0.0161084	-0.319342	3	X1463	Homoscedastic & Parametric	4.58703e-16	0.0786646	0.858436	0.526832	0.365782	0.780182	0.559164
HORVU5Hr1G038090.3	-0.280695	-0.918841	-0.192592	-0.356232	-0.409887	-0.315251	-0.0581081	-0.330841	-0.164355	-0.126455	-0.231429	0.0219469	-0.0327064	-0.0840145	-0.554614	-0.066231	-0.102489	0.2095	0.210828	-0.0507755	-0.0487326	0.198295	0.0822421	0.0471752	0.27424	0.201843	0.107347	-0.0347795	0.0638751	-0.113112	-0.186324	0.22743	0.353489	0.121946	0.389786	-0.35912	0.00391606	-0.124272	-0.475091	3	NA	Homoscedastic & Parametric	3.24067e-17	0.0636419	0.289757	0.0544811	0.439712	0.657445	0.206577
HORVU3Hr1G018220.4;HORVU3Hr1G018230.1	-0.163841	-0.966504	-0.363158	-0.214712	-0.321836	-0.129925	-0.0145633	-0.191929	-0.184717	-0.202355	-0.390649	0.15355	-0.0997016	-0.305444	-0.926802	-0.0360141	0.131712	-0.168136	0.0515002	-0.152175	0.0701082	-0.203646	0.115964	0.0504137	0.142072	0.340506	0.0524535	-0.0147867	-0.0375368	-0.258501	0.116853	0.449974	0.126831	0.106888	0.389176	-0.217226	0.170962	-0.0266488	-0.356309	3	NA	Homoscedastic & Parametric	1.468e-15	0.206146	0.684354	0.07652	0.676968	0.601154	0.305417
HORVU1Hr1G080980.2	-0.522979	-0.483073	-0.190741	-0.189939	-0.328874	-0.171167	-0.163263	-0.116146	-0.156345	-0.173393	-0.528255	0.172688	0.054317	-0.14851	-0.151749	0.092412	0.0461058	-0.163808	0.134107	0.146711	0.116291	0.255566	-0.0811534	0.0639921	0.257767	0.397465	0.0942232	-0.155105	-0.0532966	-0.241201	-0.129737	0.382212	0.122827	0.0894085	0.557168	-0.343867	0.140069	-0.0817415	-0.389375	3	NA	Homoscedastic & Parametric	2.27085e-16	0.205254	0.159963	0.100797	0.486374	0.228551	0.725359
HORVU1Hr1G042270.1	-0.514196	-0.70539	-0.277745	-0.327791	-0.353949	-0.109323	-0.179708	-0.132001	-0.311922	-0.337891	-0.511767	0.12597	0.209845	-0.0545351	-0.172196	0.135088	0.0779872	-0.198594	0.122854	0.0829348	0.0872955	0.254505	0.0613542	0.210542	0.337561	0.403855	0.321584	0.0752173	0.0796282	-0.229191	-0.225798	0.408135	0.227308	0.11154	0.434754	-0.216883	0.135517	-0.350931	-0.550653	3	NA	Homoscedastic & Parametric	3.50581e-16	0.0378312	0.0652764	0.0716099	0.247102	0.220735	0.940459
HORVU5Hr1G060800.2	-0.697186	-0.405832	-0.290884	-0.428116	-0.217594	-0.231027	0.0292906	-0.202934	-0.176895	-0.263258	-0.298253	0.165199	0.144677	-0.251396	-0.156397	-0.0225552	0.0067481	-0.173619	0.246677	0.089546	0.105562	0.228875	0.0239286	0.108806	0.312987	0.328725	0.0275245	-0.160524	-0.034722	-0.336303	0.120554	0.475742	0.230111	0.0452287	0.384097	-0.409285	0.0167702	-0.0689695	-0.346425	3	NA	Homoscedastic & Parametric	6.29076e-16	0.0900723	0.199305	0.505654	0.592342	0.421339	0.828805
HORVU1Hr1G094100.1	-0.515949	-0.573258	-0.230737	-0.417454	-0.479759	-0.0468109	-0.173819	-0.100036	-0.178288	-0.343008	-0.329749	0.275671	0.201918	-0.217101	-0.132743	0.106762	0.195938	-0.0745457	0.0918891	0.0741416	0.00209014	0.301663	0.0543286	-0.0481694	0.103959	0.502325	-0.0611858	-0.0611858	-0.0233832	-0.220193	0.0611416	0.144107	-0.00443347	0.0881021	0.298741	-0.320614	0.255527	-0.0612956	-0.282581	3	NA	Homoscedastic & Parametric	1.03317e-16	0.61225	0.0659111	0.171612	0.818197	0.0115939	0.440238
HORVU6Hr1G064720.1	-0.709399	-0.763949	-0.235891	-0.359262	-0.4847	-0.0963606	0.0296809	-0.297169	-0.310129	-0.278804	-0.500887	0.0594379	0.0879272	-0.338474	-0.428642	-0.108496	-0.00783	-0.331605	0.088589	-0.00518581	0.0721177	0.165644	-0.138322	0.250103	0.246465	0.277765	0.203794	-0.123916	0.019184	-0.583033	-0.358654	0.280394	0.640361	0.114873	0.356011	-0.0677778	0.108715	-0.0939932	-0.377773	3	NA	Homoscedastic & Parametric	1.39653e-13	0.0581471	0.15323	0.311283	0.786503	0.595653	0.478729
HORVU2Hr1G025930.2	-0.38131	-0.440593	-0.075143	-0.12383	-0.0728708	-0.216279	-0.192686	-0.00957554	-0.136378	-0.43638	-0.287795	0.409707	-0.0200879	0.23592	-0.216699	0.185177	0.0154535	-0.220863	0.0757559	0.0570922	-0.0175846	0.193587	-0.185224	0.273376	-0.117486	0.0225095	0.0502379	0.00779842	0.0964527	-0.0869903	0.366146	0.292341	0.0794898	0.395861	0.618047	-0.450682	-0.047763	-0.219834	-0.708862	3	X1728	Homoscedastic & Parametric	5.30238e-19	0.830003	0.0149192	0.00393518	0.00186793	0.0680675	0.242708
HORVU1Hr1G075110.4	-0.20302	-0.728575	-0.00670551	-0.444809	-0.39772	-0.153689	-0.0817495	0.0313709	0.070287	-0.2424	-0.357826	0.355597	0.130391	-0.0392061	-0.248819	0.157945	0.111203	0.00193523	0.209944	-0.0128524	-0.0598178	0.200835	0.037706	0.372221	0.247749	0.22681	-0.0126131	-0.0353459	0.0654165	-0.0650499	-0.0175647	0.265491	0.0118664	0.356671	0.510812	-0.302807	0.080658	-0.475644	-0.664606	3	NA	Homoscedastic & Parametric	2.67561e-16	0.351091	0.253536	0.0351387	0.0375291	0.433882	0.363074
HORVU2Hr1G046530.1	-0.286481	-0.445717	-0.0367661	-0.353431	-0.158009	-0.0940101	-0.174261	-0.145376	-0.0372292	-0.299756	-0.382153	0.0664341	0.0205675	0.120566	-0.0315844	0.122596	0.0638476	0.0947898	0.0508113	-0.0832779	-0.181346	0.157616	0.0708991	0.245315	0.103713	0.193486	-0.0837172	-0.194411	0.0277236	-0.0271732	0.147	0.195361	-0.148288	0.246886	0.444796	-0.389721	-0.161594	-0.459126	-0.805182	3	X1728	Homoscedastic & Parametric	5.23345e-19	0.467719	0.16917	0.0988152	0.00301917	0.241186	0.372376
HORVU3Hr1G062040.1	-0.326422	-0.637522	0.0358604	-0.13132	-0.193335	0.0158615	-0.225645	0.0461418	0.0433596	-0.476889	-0.382394	0.284006	0.0791869	0.22828	0.0021748	0.0909942	-0.0282276	-0.144158	-0.124697	-0.0948057	-0.0760101	0.120053	-0.184542	0.225609	0.274977	0.112561	-0.0841422	-0.20986	0.0320153	0.0117782	0.456376	0.22752	-0.032412	0.268313	0.613816	-0.095849	0.0973196	-0.333818	-0.641032	3	NA	Homoscedastic & Parametric	3.0074e-17	0.821315	0.0465386	0.0194225	0.029828	0.260646	0.451852
HORVU4Hr1G057910.1	-0.373863	-0.850347	-0.00563551	0.0290691	-0.187852	-0.0909972	-0.0257472	-0.127566	0.0139801	-0.352981	-0.362053	0.283379	0.134092	-0.0161245	-0.289495	-0.0679286	-0.0473544	-0.338445	-0.143137	0.00311348	-0.115638	0.0513646	-0.0745576	0.27964	0.340171	0.198113	-0.0857993	-0.265493	0.0167864	-0.046086	0.213785	0.0905024	-0.0714833	0.290548	0.651798	-0.00563551	0.433048	-0.24608	-0.542078	3	NA	Homoscedastic & Parametric	1.40852e-15	0.821108	0.0682659	0.0201351	0.38638	0.524847	0.631015
HORVU2Hr1G125110.6	-0.359033	-0.579322	-0.254177	-0.220155	-0.244725	-0.189106	-0.183736	-0.134557	-0.190199	-0.432421	-0.423863	0.310387	0.0434157	-0.198771	-0.107385	-0.0315936	-0.0352544	-0.126568	0.0616158	0.1022	0.0653925	-0.121533	-0.234478	0.0736454	0.14424	0.136454	-0.0714326	-0.257764	0.0576033	-0.0740858	0.444524	0.267684	-0.0470202	0.05553	0.583457	-0.134706	0.354874	-0.02068	-0.366341	3	X996	Homoscedastic & Non-parametric	7.64233e-17	0.382081	0.0868626	0.0652817	0.823726	0.499586	0.434523
HORVU5Hr1G103420.1	-0.222042	-0.511114	0.0650721	-0.445833	-0.316883	-0.364386	-0.291833	0.051885	-0.128156	-0.138355	-0.47862	0.152371	0.199761	-0.244343	-0.229384	0.176374	0.080151	0.0329785	-0.0330809	0.17748	0.0489985	-0.0654653	-0.1784	-0.0376623	0.227171	0.284201	-0.277639	-0.155635	0.2355	0.0150533	0.315736	0.274245	-0.120765	0.0738332	0.509257	-0.359933	-0.0220378	-0.354815	-0.485967	3	NA	Homoscedastic & Parametric	6.06364e-17	0.352905	0.389625	0.0205701	0.077068	0.563664	0.26516
HORVU1Hr1G032060.4	-0.212034	-0.217529	-0.395476	-0.0381979	-0.00568636	-0.133802	-0.222453	0.0374007	-0.327134	-0.399879	-0.547929	0.0514267	0.144368	-0.162406	-0.0254519	0.177749	0.31782	-0.126976	0.22233	0.339238	0.288716	0.37823	0.137867	0.215287	0.216251	0.143735	0.222888	-0.0433113	0.274898	0.27332	0.166849	0.0899208	0.0716391	0.114955	0.48022	-0.52267	-0.0751852	-0.406668	-0.60104	3	NA	Homoscedastic & Parametric	7.99935e-18	0.00357038	0.392893	0.220464	0.0252419	0.829729	0.821255
HORVU2Hr1G005550.3	-0.357064	-0.473985	-0.242765	-0.234891	-0.12332	-0.0311437	-0.108386	-0.0528427	-0.416338	-0.322383	-0.185837	-0.0173176	0.0415911	-0.325132	-0.175121	0.195383	0.241632	-0.304333	0.184154	0.251001	0.153065	0.212254	0.199287	0.18976	0.285385	0.314696	0.18135	0.357039	0.292484	0.314336	0.113234	0.140251	-0.10097	0.171492	0.305834	-0.634744	-0.186107	-0.33617	-0.977771	3	X682	Homoscedastic & Parametric	2.74085e-18	0.000319797	0.393969	0.731952	0.0116615	0.417967	0.49241
HORVU7Hr1G096900.1	-0.45676	-1.23357	-0.340489	-0.43404	-0.383183	-0.0606232	-0.0553538	-0.0628244	-0.338291	-0.300079	-0.405964	0.12809	0.0344798	-0.225658	-0.594778	0.148375	0.435417	-0.4251	0.15262	0.0299871	0.231222	0.544047	0.140892	0.500159	0.611775	0.569496	0.396498	0.635423	0.527688	0.492882	0.392654	0.624771	0.477579	0.729707	0.751877	-1.00855	-0.962958	-0.646719	-1.30823	3	X682	Homoscedastic & Parametric	1.1501e-12	0.000374893	0.42839	0.193674	0.0025481	0.393258	0.577679
HORVU7Hr1G084110.1	-0.601408	-1.04146	-0.792839	-0.636604	-0.637174	-0.0803872	-0.505005	-0.117419	-0.421097	-0.381083	-0.389986	-0.218251	-0.0631936	-0.599135	-0.750958	0.180165	0.22303	-0.236995	0.0711234	0.362696	0.202864	0.35721	0.307243	0.584483	0.40446	0.326076	0.282219	0.371201	0.192783	0.459896	0.0915863	0.225356	0.30275	0.532615	0.622954	-1.36055	-0.840051	-1.16441	-1.48438	3	X682	Homoscedastic & Parametric	3.31758e-12	2.07617e-06	0.931473	0.671938	0.00550866	0.57573	0.378906
HORVU2Hr1G003110.1	-0.449465	-0.852077	-0.225017	-0.324003	-0.303495	-0.215117	-0.144856	-0.0161044	0.0798062	-0.348358	-0.231851	0.16065	0.0232581	0.0714034	-0.6303	0.173623	0.108175	-0.206104	0.212109	0.201588	0.23002	0.467962	0.324266	0.509652	0.557578	0.642045	0.505246	0.449134	0.623679	0.398053	-0.492151	-0.205166	-0.147636	-0.0135815	0.139214	-0.794188	-0.305637	-0.687615	-0.985529	3	NA	Homoscedastic & Parametric	6.75827e-15	0.000114558	0.350486	0.0457643	0.00267713	0.970819	0.757713
HORVU2Hr1G125050.1	-0.425818	-0.764425	-0.429326	-0.503953	-0.493796	-0.0844804	-0.0390282	-0.434127	-0.258486	-0.388132	-0.222808	-0.168639	-0.264508	-0.197078	-0.389724	0.093298	0.11169	0.176319	0.247666	0.190008	0.36975	0.221828	0.457008	0.652498	0.549698	0.515623	0.360107	0.262695	0.417684	0.478899	-0.224895	0.0576436	-0.326048	-0.0519185	0.256223	-0.395847	0.0778522	-0.711301	-0.72349	3	NA	Homoscedastic & Parametric	5.60971e-14	6.94283e-07	0.581344	0.852891	0.595869	0.342477	0.429266
HORVU2Hr1G125020.3	-0.651768	-0.50236	-0.774196	-0.36879	-0.286468	0.0764431	-0.368841	-0.188094	-0.264722	-0.436225	-0.163661	-0.0508955	-0.071699	-0.203408	-0.169197	-0.0820418	0.0437771	0.369845	0.277352	0.220321	0.345662	0.307156	0.41445	0.476624	0.243127	0.384092	0.164585	0.153954	0.226981	0.24602	0.000490411	0.185856	0.0365932	0.343814	0.424865	-0.462864	0.140257	-0.533778	-0.560437	3	NA	Homoscedastic & Parametric	9.77783e-15	0.000110358	0.579205	0.688722	0.744138	0.790032	0.882271
HORVU7Hr1G089470.2	-0.427302	-0.35784	-0.308917	-0.242439	-0.173322	-0.178403	-0.145234	-0.118795	-0.0834371	-0.148938	-0.241994	0.022453	-0.150733	-0.230578	-0.268596	0.0928668	-0.00218532	0.39552	0.319033	0.0647373	0.1126	0.195274	0.127196	0.202056	0.223801	0.329686	0.0171154	0.00938511	0.086202	-0.0142433	-0.0516232	0.17329	0.0402496	0.250676	0.383714	-0.508608	-0.0291777	-0.357575	-0.460878	3	NA	Homoscedastic & Parametric	4.87435e-19	0.00325544	0.939935	0.581745	0.208659	0.895211	0.308816
HORVU5Hr1G111510.1	-0.466221	-0.521189	-0.471577	-0.4324	-0.147017	-0.186184	-0.065386	-0.0553645	-0.0671706	-0.195717	-0.25807	0.122129	-0.0881248	-0.112351	-0.165895	0.204113	0.169936	-0.0281101	0.46221	0.143228	0.111147	0.331237	0.201203	0.145004	0.310295	0.521547	0.233001	0.367351	0.367179	0.225138	-0.0541834	0.0600364	-0.063051	0.034026	0.34463	-0.66091	-0.284767	-0.38173	-0.585978	3	NA	Homoscedastic & Parametric	4.26195e-17	0.000342585	0.998715	0.675637	0.0495694	0.517688	0.998776
HORVU6Hr1G019520.1	-0.375754	-0.446544	-0.312741	-0.382301	-0.18927	-0.202817	-0.127386	-0.133951	-0.194642	-0.382732	-0.424511	0.0992288	0.0269099	-0.156925	-0.254766	0.235863	0.0828681	0.108126	0.289791	0.202968	0.235335	0.254623	0.139072	0.148675	0.257262	0.433188	0.112832	0.181294	0.337331	0.150777	-0.104819	-0.00556783	-0.159347	0.00287458	0.317281	-0.264829	0.0159411	-0.330503	-0.529797	3	NA	Homoscedastic & Parametric	2.71056e-19	0.000549756	0.272842	0.164919	0.256076	0.30621	0.451535
HORVU4Hr1G021270.2	-0.247909	-0.539313	-0.249698	-0.402135	-0.355844	-0.306403	-0.140471	-0.0493888	-0.19068	-0.383061	-0.402569	0.0019919	-0.0253305	-0.21528	-0.396628	0.107773	0.13645	-0.0690729	0.189848	0.255438	0.0957373	-0.00968964	0.130486	0.277858	0.156613	0.439577	0.275593	0.281632	0.250997	0.151824	0.0969094	0.34038	-0.120959	0.154256	0.393533	-0.553126	-0.0638672	-0.220354	-0.484434	3	NA	Homoscedastic & Parametric	1.94381e-18	0.000119402	0.536055	0.129759	0.237921	0.948657	0.94992
HORVU1Hr1G003340.9	-0.505966	-0.409329	-0.396403	-0.622088	-0.471976	-0.447206	-0.220326	-0.222106	-0.275322	-0.399942	-0.604023	-0.189231	-0.349609	-0.34319	-0.439597	0.173481	0.241788	-0.0762581	0.355354	0.446481	0.267062	0.295067	0.2281	0.259239	0.263917	0.320228	0.417567	0.302411	0.402892	0.21835	0.154736	0.145384	-0.0684413	0.0642477	0.29324	-0.301494	-0.0192424	-0.524245	-0.563531	3	NA	Homoscedastic & Non-parametric	1.04504e-20	1.2484e-08	0.977327	0.621701	0.696357	0.578654	0.637143
HORVU2Hr1G125090.1	-0.504288	-0.68525	-0.487169	-0.645061	-0.6947	-0.374616	-0.262549	-0.363003	-0.31833	-0.513772	-0.581205	-0.273619	-0.17669	-0.404969	-0.361354	0.176342	0.184519	0.155106	0.30961	0.154935	0.168829	0.350891	0.115309	0.382575	0.411364	0.575906	0.333727	0.225877	0.304465	0.168	-0.00542342	0.305847	0.0796562	0.208648	0.52608	-0.434396	0.0536631	-0.495902	-0.672503	3	NA	Homoscedastic & Non-parametric	9.06744e-18	1.81848e-06	0.469014	0.62798	0.824596	0.56061	0.834641
HORVU2Hr1G026970.2	-0.849101	-0.853217	-0.802541	-1.06275	-1.01301	-0.632844	-0.502426	-0.407953	-0.870873	-0.78069	-0.681787	-0.294201	-0.218005	-0.501625	-0.57126	0.204949	0.396942	0.210245	0.406041	0.137657	0.375772	1.01808	0.10014	0.917719	0.739903	0.679888	0.531559	0.141201	0.0367236	-0.155237	0.0378504	0.51578	0.365749	-0.146518	-0.0304206	-0.998166	-0.609294	-0.797804	-1.28378	3	NA	Homoscedastic & Non-parametric	2.91519e-12	1.38296e-05	0.230735	0.588117	0.0845422	0.259314	0.776612
HORVU3Hr1G097120.1	-0.243965	-0.746716	-0.283164	-0.161072	-0.223836	-0.0692545	-0.221095	0.0661556	0.159924	-0.657619	-0.331556	0.151696	-0.192857	0.172849	-0.236433	0.0690998	0.0298882	0.0463227	0.284388	-0.0103636	-0.0577871	0.300768	0.121738	0.0390527	0.330285	0.461412	0.213398	0.26916	0.255839	0.138205	0.0483558	0.380916	-0.145778	-0.116067	0.282364	-0.797655	-0.313156	-0.429781	-0.589697	3	X763	Homoscedastic & Parametric	5.96653e-16	0.0832839	0.4664	0.0921442	0.00807197	0.364452	0.394166
HORVU3Hr1G098340.3	-0.322151	-0.331528	-0.0985505	-0.397292	-0.281491	-0.160812	-0.326317	-0.248677	-0.299352	-0.415527	-0.443595	-0.0624754	-0.0447435	-0.0160869	-0.00329154	0.462438	-0.131922	0.0116144	0.265969	0.458089	-0.0150691	0.126383	0.00439879	0.127372	0.347363	0.114545	0.227664	0.00858797	0.106874	0.169316	-0.0886726	-0.0294891	-0.0992294	0.0183364	0.0996355	-0.302321	-0.11783	-0.52858	-0.881148	3	NA	Homoscedastic & Parametric	3.59989e-18	0.000530951	0.112077	0.28273	0.0237755	0.894824	0.597278
HORVU1Hr1G002760.2	-0.376351	-0.678634	-0.210073	-0.783556	-0.675947	-0.252265	-0.228685	-0.268876	-0.0831038	-0.656411	-0.675409	0.110146	0.542373	-0.137026	-0.312368	0.0840087	0.0839954	-0.273518	-0.160985	0.28173	0.826394	-0.0150258	-0.0176734	0.775345	0.877414	0.405568	0.327704	0.3761	0.214107	0.210682	-0.021223	0.0287286	-0.0612073	-0.0600766	0.257574	-0.685669	-0.533792	-0.709079	-1.64721	3	NA	Homoscedastic & Parametric	1.967e-10	0.00450602	0.156272	0.136824	0.013106	0.734552	0.709021
HORVU2Hr1G076650.1	-0.367714	-0.673901	-0.251395	-0.282988	-0.107458	-0.0276219	-0.369798	-0.134541	-0.171977	-0.450051	-0.315632	-0.0820322	0.30049	0.273235	0.308977	0.596579	0.222724	-0.121815	-0.07372	0.0599276	-0.152185	0.543534	-0.174835	0.0232787	0.213918	0.210345	0.040995	0.0389608	0.23792	0.117795	0.280865	0.28002	-0.00422992	0.151972	0.563026	-0.399818	-0.090595	-0.172588	-0.657276	3	NA	Homoscedastic & Parametric	7.18876e-15	0.464722	0.123293	0.234101	0.0694007	0.0251718	0.930431
HORVU4Hr1G025090.1;HORVU5Hr1G048380.2	-0.395575	-0.408183	-0.337243	-0.43924	-0.152402	-0.13357	-0.346669	-0.155736	-0.0710751	-0.295522	-0.360875	0.118646	-0.0484093	-0.0579143	0.200424	0.187915	0.425029	-0.15098	0.280666	0.134989	-0.0919274	0.0396837	0.033001	0.162488	0.230734	0.204323	-0.0332332	-0.0354974	0.297952	-0.0664446	-0.02972	-0.00164914	0.0292469	0.244923	0.575944	-0.472936	0.0256671	0.00275133	-0.368966	3	NA	Homoscedastic & Parametric	5.1611e-15	0.0275679	0.635914	0.723012	0.760078	0.691739	0.537392
HORVU1Hr1G057570.4	-0.531849	-0.763292	-0.361319	-0.288147	-0.131008	-0.0841669	-0.373753	-0.0827121	-0.149556	-0.450296	-0.59046	0.0371514	-0.0168763	0.00866165	0.147163	0.497349	0.324576	-0.242013	0.140904	0.156355	-0.158556	0.100252	-0.0558775	0.0272983	0.236475	0.282702	0.158435	-0.0293473	0.288391	0.0489056	-0.35886	-0.0210802	0.110854	0.141646	0.403243	-0.441624	-0.022784	-0.28009	-0.643441	3	NA	Homoscedastic & Parametric	6.95119e-15	0.0354789	0.360431	0.256511	0.209509	0.286994	0.690722
HORVU3Hr1G024610.13	-0.549105	-0.732892	-0.474572	-0.502241	-0.352041	-0.285638	-0.286525	-0.209231	-0.196299	-0.235515	-0.349037	-0.080313	-0.073348	-0.270753	0.58731	0.105473	-0.0358841	0.0649958	0.240916	0.214585	0.20594	0.108702	0.0249834	0.011274	0.0982175	0.14702	0.064427	0.0101191	0.0104212	-0.0980384	0.255445	0.282618	0.0800879	0.334717	0.582358	-0.176911	0.0708452	-0.148239	-0.438832	3	NA	Homoscedastic & Parametric	6.52524e-13	0.0299607	0.848205	0.455824	0.554314	0.945298	0.637724
HORVU1Hr1G078500.1	-0.431112	-0.636247	-0.106002	-0.299706	-0.319077	-0.0323772	-0.381264	-0.0593977	0.0937549	-0.414874	-0.319614	0.134032	0.171418	0.367027	0.41774	0.382097	0.0688153	-0.0639634	0.160784	-0.162845	-0.564525	-0.109934	-0.375161	0.0164144	0.111677	-0.0784614	-0.0753946	-0.0547105	-0.139462	-0.594725	0.39349	0.275482	0.188465	0.342863	0.697958	-0.286807	0.161124	-0.118779	-0.427806	3	NA	Homoscedastic & Parametric	3.64846e-14	0.472905	0.109926	0.208952	0.221225	0.120846	0.930633
HORVU5Hr1G007960.1	-0.346587	-0.508776	-0.322686	-0.237231	-0.16848	-0.0204203	-0.341868	0.0368415	-0.082706	-0.524727	-0.339591	0.0597275	0.124787	0.144798	0.221689	0.354039	0.00542478	-0.225193	-0.043138	-0.083427	-0.278731	-0.124642	-0.173646	-0.0443692	0.165839	0.0909102	-0.0502385	-0.2026	-0.0711604	-0.199013	0.327902	0.271844	0.17977	0.35237	0.482588	-0.114335	0.241768	0.0423207	-0.181039	3	NA	Homoscedastic & Parametric	3.35553e-17	0.871125	0.192318	0.277239	0.75501	0.219166	0.873324
HORVU7Hr1G075360.2	-0.817554	-1.16318	-0.754912	-0.675664	-0.606003	-0.170084	-0.550016	-0.0710976	-0.132464	-0.661647	-0.389971	0.148912	0.08915	0.334097	0.45021	0.823858	0.378148	-0.223737	0.335515	-0.0788293	-0.62068	0.00193694	-0.401879	0.143222	0.462723	0.188765	0.0595067	0.0181112	0.138897	-0.12392	0.530687	0.500285	0.261557	0.495541	1.0949	-0.437197	-0.082122	-0.274816	-0.742264	3	NA	Homoscedastic & Non-parametric	2.376e-09	0.301775	0.205307	0.50818	0.335449	0.162751	0.711692
HORVU1Hr1G073640.1	-0.784847	-0.844221	-0.590846	-0.212561	-0.233443	-0.168108	-0.542403	-0.0208271	0.0237721	-0.544586	-0.397218	0.115246	-0.06519	0.278374	0.32751	0.319416	0.10764	-0.298173	0.087658	-0.150306	-0.495708	-0.0274531	-0.472162	0.144331	0.148413	0.162793	-0.106391	-0.250241	-0.0571334	-0.220149	0.855305	0.223034	-0.0246253	0.44921	0.869225	-0.417249	0.0286765	0.0677752	-0.404147	3	NA	Homoscedastic & Non-parametric	1.28916e-11	0.736821	0.28574	0.308423	0.644031	0.293886	0.844954
HORVU5Hr1G111820.1	-0.660175	-0.542101	-0.31407	-0.495996	-0.437818	-0.144274	-0.168389	-0.139465	-0.100196	-0.451226	-0.42243	-0.0179203	-0.115728	-0.121335	-0.0657091	0.219707	0.0425313	-0.0931141	0.199608	0.150298	-0.118194	-0.0705409	0.00101039	-0.0567391	0.183904	0.312269	-0.0858866	0.0758202	0.0632641	-0.16379	0.339593	0.435087	0.0656903	0.23336	0.553754	-0.186489	0.18423	-0.210584	-0.562982	3	NA	Homoscedastic & Parametric	5.70939e-16	0.0425724	0.327656	0.693089	0.813189	0.263301	0.816231
HORVU2Hr1G068120.2	-0.471107	-0.820217	-0.192136	-0.468709	-0.309102	-0.14575	-0.132037	-0.158317	-0.116473	-0.385891	-0.454873	-0.101596	-0.24013	-0.0616439	-0.0782259	0.271795	0.0190141	-0.0425746	0.258367	0.0986064	-0.385908	0.0071356	-0.0724456	-0.024008	0.17305	0.342645	-0.112042	0.0483277	-0.0273122	-0.310142	0.562229	0.322205	0.0856822	0.49339	0.809492	-0.286024	0.0303758	-0.306029	-0.69861	3	NA	Homoscedastic & Non-parametric	1.46815e-15	0.106479	0.586948	0.499441	0.562259	0.341	0.972368
HORVU5Hr1G075420.2;HORVU5Hr1G075500.3	-0.478014	-0.62105	-0.207352	-0.451496	-0.365026	-0.156539	-0.215306	-0.0285558	-0.039268	-0.489562	-0.367672	0.0253332	-0.00913309	-0.0229018	0.161785	0.274656	0.128939	-0.133298	0.170679	0.0721128	-0.269282	-0.283839	-0.0568249	0.00166813	0.107376	0.201816	-0.231813	-0.123525	-0.0453146	-0.158795	0.470873	0.0015678	-0.162906	0.406959	0.615074	-0.262289	0.0598938	-0.445813	-0.498334	3	NA	Homoscedastic & Parametric	6.30084e-14	0.486132	0.399621	0.570486	0.413836	0.353446	0.928852
HORVU2Hr1G092600.4	-0.594103	-0.628512	-0.203826	-0.320177	-0.387007	-0.330025	-0.254658	-0.116802	-0.262833	-0.656887	-0.46747	0.0177458	0.0183846	-0.120162	-0.0833694	-0.00203926	-0.0163162	-0.228741	-0.0494049	-0.0852725	-0.364763	-0.142919	-0.119405	0.0716157	0.194655	0.202449	-0.235768	-0.0421252	-0.0969493	-0.348671	0.503166	0.235576	0.121512	0.413627	0.752709	0.044188	0.270566	-0.0213683	-0.35864	3	NA	Homoscedastic & Non-parametric	4.65488e-17	0.451744	0.0334752	0.0760856	0.373004	0.0742063	0.789251
HORVU2Hr1G043220.1	-0.410971	-0.430853	-0.514264	-0.505373	-0.225061	-0.0482762	-0.396029	0.00425116	0.0446573	-0.156403	-0.343228	-0.0024792	-0.170238	0.0419921	0.322318	0.620318	0.200163	-0.11575	0.215774	0.321844	-0.686175	0.0397713	0.0335005	0.128668	0.0712761	0.0784906	0.102292	-0.0511718	0.0617631	-0.147417	0.901168	0.0980965	0.00770331	0.308424	1.02724	-0.550406	-0.042271	-0.392305	-0.785052	3	NA	Homoscedastic & Non-parametric	7.09282e-12	0.0802653	0.713525	0.752926	0.323791	0.91656	0.281212
HORVU0Hr1G004480.1	-0.508342	-0.617695	-0.408302	-0.456512	-0.251465	0.0188647	-0.324453	-0.000454622	-0.0830684	-0.491471	-0.517315	0.304693	0.151062	0.152174	0.0067683	0.0823786	0.230672	-0.444136	0.0325955	-0.105247	-0.19232	0.0178941	-0.00142222	0.248769	0.178978	0.17809	0.366135	-0.0350489	0.16288	-0.0129199	0.836583	-0.123932	-0.237444	0.250363	0.456661	-0.486491	-0.38034	-0.667239	-0.92456	3	X1728	Homoscedastic & Parametric	1.229e-12	0.248565	0.234922	0.216208	0.0167373	0.618924	0.763158
HORVU2Hr1G068670.2	-0.21723	-0.626138	-0.334873	-0.523646	-0.263713	-0.291966	-0.386436	0.227552	0.42752	-0.541424	-0.344137	0.424804	0.189228	0.0688547	-0.396733	0.0869208	0.0408071	0.00745028	0.185585	0.00515953	-0.0707752	0.428313	0.0592033	0.185622	0.254532	0.463765	-0.0368542	-0.0849374	0.215703	0.0316154	0.154285	0.217731	0.018533	0.403144	0.760297	-0.169549	0.249252	0.350492	0.492256	3	NA	Homoscedastic & Parametric	1.61807e-12	0.479371	0.845039	0.0569462	0.17323	0.645909	0.302716
HORVU3Hr1G036860.2	-0.469948	-0.671931	-0.310057	-0.589445	-0.633756	-0.211246	0.0431839	0.0814664	0.104768	-0.215457	-0.281006	0.245298	0.241379	-0.169552	-0.227566	-0.0319808	0.0963774	-0.209376	0.239745	-0.283167	0.136965	0.62472	-0.427134	0.0762927	0.27457	0.456492	0.0746021	0.192017	0.0801101	0.0752039	0.281084	0.284967	0.0729266	0.113413	0.468897	0.176353	0.480345	0.567154	-0.156988	3	NA	Homoscedastic & Parametric	3.25948e-12	0.447746	0.551405	0.39167	0.0377185	0.148908	0.751117
HORVU2Hr1G109500.1	-0.471599	-0.335933	-0.341904	-0.37948	-0.448462	-0.421634	-0.119643	-0.010819	0.0530096	-0.0920079	-0.224067	0.123337	0.0498906	-0.124207	-0.130047	-0.0890298	-0.0107681	-0.141072	0.263675	-0.0556411	-0.00958359	0.20768	-0.217477	0.0117698	0.364127	0.266945	-0.000298851	0.101029	0.132035	-0.0457362	-0.064306	0.137069	-0.000620389	0.196163	0.860911	-0.142076	0.462001	-0.11139	-0.369411	3	X813	Homoscedastic & Non-parametric	8.08941e-14	0.185152	0.726366	0.457357	0.505734	0.780363	0.929
HORVU5Hr1G074340.2	-0.361861	-0.699035	-0.204917	-0.550325	-0.371945	-0.189208	-0.0780368	-0.12954	-0.110455	-0.28259	-0.293346	0.123893	0.0135604	-0.290811	-0.507584	-0.101121	0.00444903	-0.293654	0.214298	0.130735	-0.148546	-0.34456	-0.0881539	0.0580039	0.104901	0.382305	0.130462	0.0524163	0.286789	-0.0971634	0.0663786	0.289144	-0.125273	0.240144	0.560605	-0.0184184	0.682143	0.325299	0.22544	3	X1632	Homoscedastic & Parametric	1.31351e-13	0.0450503	0.620476	0.324847	0.00214688	0.772695	0.714238
HORVU2Hr1G113180.3	-0.45886	-0.595226	-0.351023	-0.480326	-0.371473	-0.352119	-0.307465	-0.0681538	-0.143819	-0.267811	-0.398908	0.0593669	0.0127278	-0.187427	-0.39092	0.0863026	0.0801328	-0.304105	0.231919	-0.0859037	-0.0828091	0.239636	-0.25801	0.0107606	0.120568	0.290924	0.178175	0.197033	0.178014	0.0250163	0.410497	0.456414	0.0817505	0.163315	0.815928	0.181074	0.614065	0.265543	0.117063	3	X1632	Homoscedastic & Non-parametric	5.21383e-17	0.0443599	0.517618	0.0703377	0.000850387	0.322932	0.490229
HORVU7Hr1G001040.6	-0.410848	-0.543902	-0.227817	-0.509545	-0.501604	-0.37556	-0.229986	-0.153079	-0.186231	-0.549223	-0.488107	0.216353	0.243674	0.0259335	-0.441988	-0.0232735	-0.0659156	-0.241171	0.102065	-0.0435388	-0.0672446	0.164216	-0.122226	0.201806	0.323278	0.257546	0.195558	0.134846	0.246128	-0.029501	0.176985	0.253089	0.0389808	0.177368	0.496514	0.183069	0.415246	0.182947	0.031859	3	X1632	Homoscedastic & Parametric	6.56685e-18	0.0527023	0.0150174	0.00540661	0.0445412	0.245156	0.676403
HORVU7Hr1G000260.2	-0.538288	-0.775863	-0.280463	-0.637574	-0.611156	-0.450069	-0.150394	-0.334158	-0.257549	-0.490749	-0.532992	0.041953	0.0113711	-0.196489	-0.598904	-0.0622789	-0.0346206	-0.208783	0.101504	-0.0384676	-0.0532878	0.193216	-0.0828167	0.226248	0.454934	0.314935	0.337598	0.182271	0.203765	-0.0540867	0.416691	0.436178	0.241523	0.316279	0.743618	0.0695786	0.502728	0.173915	-0.107766	3	X1632	Homoscedastic & Parametric	7.8863e-15	0.00151641	0.131582	0.0801385	0.0112364	0.73229	0.62422
HORVU0Hr1G038120.1	-0.665876	-0.691738	-0.407385	-0.78258	-0.481068	-0.431509	-0.0600192	-0.245529	-0.24695	-0.456895	-0.548867	0.0974545	0.331357	-0.268661	-0.578011	0.044462	0.039142	-0.513909	-0.118732	-0.0398213	-0.118762	0.349337	-0.142136	0.135662	0.25236	0.406723	-0.00942276	0.0499055	0.312268	-0.0783583	-0.0706274	0.361159	0.289473	0.434531	0.666065	0.195482	0.458806	0.267177	0.0250123	3	X1632	Homoscedastic & Parametric	2.57427e-13	0.0642879	0.171879	0.127257	0.0148562	0.219337	0.70595
HORVU7Hr1G034920.1;HORVU5Hr1G057400.1	-0.341989	-0.751039	-0.435491	-0.521455	-0.451556	-0.354276	-0.342903	-0.207662	-0.251062	-0.445048	-0.537317	-0.0643502	-0.190718	-0.393947	-0.694801	0.112191	-0.0776306	-0.236811	0.178017	-0.211073	0.132518	-0.205369	-0.043601	0.0841683	0.0389612	0.27185	0.161787	0.0865699	0.149974	-0.0267732	0.284843	0.379537	0.157234	0.270103	0.578827	-0.0746083	0.274268	0.175648	0.0407723	3	X1632	Homoscedastic & Parametric	8.08676e-17	0.00239892	0.844672	0.118809	0.000823986	0.913055	0.415002
HORVU0Hr1G016330.1	-0.247287	-0.332482	-0.333578	-0.400386	-0.204089	-0.180685	-0.205027	-0.185602	-0.165128	-0.474275	-0.439217	0.122816	-0.0271051	-0.215484	-0.286016	0.087909	0.091505	-0.163422	0.164985	0.0757519	-0.105653	0.224928	0.0196262	0.0952365	0.2152	0.341245	0.0427879	0.0941009	0.222223	0.0624418	0.0329092	0.0921222	-0.144077	0.103214	0.421956	-0.262518	0.403021	0.0170998	-0.178792	3	X1632	Homoscedastic & Parametric	3.45103e-17	0.0123704	0.459362	0.317828	0.154236	0.421026	0.855851
HORVU6Hr1G050750.17	-0.304748	-0.436667	-0.351473	-0.608664	-0.221276	-0.204809	-0.220722	-0.103888	-0.194193	-0.330349	-0.38125	0.102088	0.0574511	-0.333467	-0.338922	0.043184	0.0840522	-0.0978684	0.311376	0.0382246	-0.229707	0.0612642	0.0987164	0.0724545	0.319961	0.419784	0.169289	0.148616	0.261266	0.0137767	0.0110534	0.0684249	-0.0935226	0.110101	0.343272	-0.273121	0.355132	0.0467875	-0.153711	3	X1632	Homoscedastic & Parametric	9.41368e-16	0.00336563	0.846887	0.435286	0.117171	0.986147	0.710784
HORVU6Hr1G013670.17	-0.449585	-0.477511	-0.361228	-0.578629	-0.257384	-0.362643	-0.227584	-0.0425031	-0.191827	-0.409549	-0.499151	0.229917	0.119295	-0.325249	-0.29732	0.0370787	-0.00317554	-0.21307	0.261722	0.0181091	-0.186926	0.299225	0.0886597	0.0770504	0.307603	0.402014	0.0957368	0.155627	0.27708	-0.0118051	0.0575248	0.23319	-0.0480896	0.254944	0.574239	-0.238495	0.358057	0.138542	-0.139659	3	X1632	Homoscedastic & Parametric	2.29509e-14	0.0311433	0.486401	0.194867	0.198314	0.519231	0.948857
HORVU5Hr1G118270.1	-0.50324	-0.592452	-0.392343	-0.585436	-0.241551	-0.35884	-0.183904	-0.169699	-0.348541	-0.462578	-0.476706	0.0881166	-0.0349785	-0.337147	-0.432408	-0.0421874	0.0217438	-0.26285	0.199444	-0.0267563	-0.296939	0.0144784	-0.0171624	0.0178827	0.267858	0.372447	0.0990644	0.113134	0.328372	0.00723725	0.163452	0.253972	-0.0324063	0.223422	0.526884	-0.22091	0.395375	0.120678	-0.0435152	3	X1632	Homoscedastic & Parametric	7.63187e-15	0.00652655	0.483895	0.281192	0.0326476	0.801916	0.674891
HORVU5Hr1G095910.1;HORVU5Hr1G096010.36	-0.494439	-0.695735	-0.355493	-0.675402	-0.455971	-0.353414	-0.222915	-0.22902	-0.117319	-0.39714	-0.375634	0.0807925	-0.0658644	-0.364905	-0.515456	0.0773231	0.0361245	-0.286889	0.298208	-0.0127002	-0.231162	-0.138066	-0.0830518	0.0342692	0.29188	0.268689	0.0791698	0.204703	0.268644	-0.0190894	-0.0453769	-0.0926102	-0.148053	-0.0392927	0.303968	0.0625722	0.477511	0.167939	-0.216045	3	X1632	Homoscedastic & Parametric	1.59137e-14	0.00578484	0.614135	0.293346	0.00770224	0.911543	0.751682
HORVU2Hr1G019960.2	-0.574118	-1.32656	-0.370224	-0.44661	-0.521453	-0.268638	-0.773545	-0.228645	-0.451413	-1.05191	-1.07238	0.0957128	-0.0473215	-0.110381	-0.574488	0.0354331	0.0578204	-0.205318	0.224914	0.0255605	-0.101607	0.182081	-0.00309557	0.363122	0.276733	0.125574	0.315128	0.158307	-0.0521237	-0.168324	0.09336	0.45808	0.262503	0.253782	0.697461	0.0248274	0.455851	-0.213157	-0.250657	3	X1632	Homoscedastic & Parametric	9.55204e-14	0.0178212	0.0474217	0.0051364	0.234103	0.319093	0.372856
HORVU7Hr1G015760.1	-0.462884	-0.666913	-0.367796	-0.0214235	-0.237233	-0.192958	-0.0946369	-0.147533	-0.0146	-0.192879	-0.132357	0.0253327	-0.211098	-0.283621	-0.37356	-0.0508147	-0.136512	-0.14841	-0.124876	0.0394216	-0.00747815	0.190207	-0.139222	0.0280322	-0.277881	0.186459	-0.122543	-0.220544	-0.0979734	-0.108985	1.03922	0.716319	-0.12285	0.210114	0.627786	0.0812445	0.499219	0.291845	-0.0152854	3	NA	Heteroscedastic & Non-parametric	2.69725e-15	0.565639	0.779606	0.428648	0.0137776	0.544443	0.633947
HORVU2Hr1G002440.16	-0.32688	-0.74609	-0.3083	-0.199885	-0.370606	-0.315524	-0.333093	-0.0771411	0.0995786	-0.41093	-0.281785	0.0358529	-0.506389	-0.257705	-0.538989	-0.10195	-0.241098	-0.43925	-0.0981655	0.0935881	-0.114108	0.138704	-0.0630732	0.0480493	0.141471	0.400476	-0.226971	0.181059	0.0464952	-0.130921	0.288533	0.55576	0.0521105	0.282063	0.490918	0.237894	0.862018	0.673172	0.235832	3	NA	Homoscedastic & Non-parametric	4.81499e-16	0.0585499	0.804875	0.151397	9.58618e-06	0.899289	0.823486
HORVU1Hr1G093890.6	-0.412363	-0.690373	-0.372356	-0.165637	-0.170523	-0.118379	-0.30701	-0.172718	-0.112091	-0.255225	-0.305406	0.0935407	-0.317875	-0.409694	-0.389103	0.189624	-0.0408828	-0.202262	0.0334225	0.0252058	-0.0509761	0.039685	-0.235933	-0.0509563	-0.0710876	0.112825	-0.270567	-0.0476291	-0.115141	-0.0248564	0.311636	0.254566	0.0105295	0.371951	0.717907	0.358089	0.5989	0.236217	0.0468254	3	X1297	Homoscedastic & Non-parametric	4.69763e-18	0.261113	0.990274	0.264734	8.05983e-05	0.40396	0.395935
HORVU5Hr1G075370.1	-0.345705	-0.874146	-0.463592	-0.440058	-0.0446422	-0.266143	-0.151114	0.073799	-0.0150022	-0.0765153	-0.33875	0.0432715	-0.0998056	-0.416807	-0.353291	0.126626	0.0578546	-0.573782	0.0458926	-0.232044	-0.162427	0.18236	-0.456022	-0.144764	-0.104244	0.172179	-0.0392012	0.374317	-0.191319	-0.144497	0.362125	0.215568	-0.0351813	0.13765	0.523929	0.500142	0.685898	0.251769	0.0516627	3	NA	Homoscedastic & Parametric	3.73569e-14	0.431088	0.214772	0.478785	2.24374e-05	0.368251	0.975323
HORVU3Hr1G074920.1	-0.487626	-0.755974	-0.403575	-0.637324	-0.653658	-0.488647	-0.266937	-0.572621	-0.37699	-0.559908	-0.373568	-0.706608	-0.34402	-0.507961	-0.893163	-0.0314141	-0.0151824	-0.125482	0.213268	0.0771727	0.150528	0.0659436	0.00146609	0.168368	-0.00102108	0.020773	-0.113985	-0.199213	0.171613	0.140088	0.575089	0.456752	-0.0450393	0.152751	0.660752	0.306096	0.67261	0.648772	0.202009	3	NA	Heteroscedastic & Non-parametric	1.28647e-17	3.83963e-05	0.907378	0.841951	1.69183e-08	0.722722	0.80704
HORVU7Hr1G052770.1	-0.869692	-0.815023	-0.683248	-0.724412	-0.955902	-0.495173	-0.456708	-0.407066	0.0121355	-0.236357	-0.275661	-0.410717	-0.412279	-0.313295	-0.649608	-0.164507	-0.154399	-0.265715	0.0928084	-0.127991	-0.0925276	0.00371485	-0.179661	-0.0968062	0.0239271	0.111177	-0.191703	0.0582813	-0.0610787	-0.165748	0.338954	0.512716	0.250073	0.164982	0.545143	0.414313	0.628902	0.769878	0.0660166	3	NA	Heteroscedastic & Parametric	3.20051e-12	0.0155894	0.764074	0.884852	3.65753e-08	0.906964	0.970342
HORVU5Hr1G053680.3	-0.467099	-0.593313	-0.298603	-0.265552	-0.319871	-0.107611	-0.15396	-0.346025	0.0106485	-0.140325	-0.286989	0.218773	0.27483	0.0117273	-0.223685	0.0903527	-0.129027	-0.101956	-0.0206961	-0.000929263	-0.0455921	0.0762193	-0.0215509	0.136064	0.471316	0.131514	0.18713	-0.139349	-0.21335	-0.310877	0.229559	0.403825	0.387119	0.263806	0.577633	0.192868	0.265541	-0.204215	-0.416355	3	NA	Homoscedastic & Parametric	2.72702e-16	0.319099	0.087188	0.0668508	0.879294	0.587198	0.934581
HORVU3Hr1G033520.1	-0.423864	-0.666358	-0.0740814	-0.0825543	-0.361905	-0.22961	-0.170842	-0.228017	-0.040595	-0.211154	-0.355899	0.155256	0.206013	-0.153063	-0.354693	-0.01233	-0.0286888	-0.212945	0.121013	0.10647	0.0751791	0.041487	-0.203887	0.158524	0.37327	0.273676	0.0792794	-0.0636059	-0.251246	-0.487207	0.10318	0.170895	0.280773	0.103126	0.371989	0.287868	0.41734	0.0160462	-0.226736	3	NA	Homoscedastic & Parametric	2.1465e-17	0.442783	0.0506028	0.0110509	0.298979	0.293674	0.583124
HORVU6Hr1G012570.2	-0.444129	-0.938517	-0.198079	-0.0884849	-0.317967	-0.172241	0.177277	-0.0940382	-0.0298615	-0.296089	-0.37478	0.149597	0.267211	-0.013529	-0.361423	-0.0907429	-0.202719	-0.569375	-0.0745759	-0.0171121	-0.0248615	0.0214311	-0.349003	0.0845045	0.199212	0.155534	-0.105953	0.00781484	-0.211237	-0.187148	0.234501	0.351452	0.017369	0.271721	0.616124	0.131902	0.568873	0.404784	-0.00478794	3	NA	Homoscedastic & Parametric	1.35821e-15	0.798346	0.093055	0.0441662	0.0608945	0.256194	0.660908
HORVU5Hr1G002150.1	-0.379073	-0.868853	-0.21562	-0.164934	-0.338606	-0.147353	0.133796	0.0349725	-0.139191	-0.246101	-0.400571	0.216247	0.467163	-0.0363786	-0.31634	-0.138837	-0.18649	-0.446715	-0.0543943	-0.176355	0.133427	-0.107877	-0.333108	0.018327	0.319348	0.099968	0.117725	-0.0202171	-0.223972	-0.220388	0.0583366	0.271387	0.350861	0.32399	0.365589	0.16007	0.274754	0.017835	-0.367058	3	NA	Homoscedastic & Parametric	6.54264e-16	0.707844	0.0655695	0.0240976	0.806389	0.376373	0.45677
HORVU7Hr1G121390.3	-0.673186	-0.504574	-0.122804	-0.489575	-0.425718	-0.228095	0.18299	-0.238663	-0.127689	-0.0853463	-0.432904	0.315903	0.304299	-0.0582154	-0.106876	-0.247586	-0.116794	-0.366045	0.119689	-0.212406	-0.115193	0.130879	-0.447683	-0.0240551	0.161832	0.158274	0.0772936	-0.316041	-0.26023	-0.710518	0.0716249	0.436038	0.455265	0.02588	0.457477	-0.263966	0.0831381	-0.0985289	-0.338404	3	NA	Homoscedastic & Parametric	9.61346e-15	0.682198	0.0658781	0.184462	0.327982	0.222703	0.980881
HORVU7Hr1G078140.3	-0.410932	-0.627177	-0.284629	-0.427043	-0.323186	-0.179602	-0.130981	0.0447016	0.0301185	-0.201789	-0.290099	0.0793295	0.368452	-0.172747	-0.133026	-0.313184	-0.115944	-0.179167	0.19546	-0.409799	-0.0356142	-0.369718	-0.389053	-0.220941	0.074705	0.187504	-0.0372368	-0.0361703	-0.0550542	-0.179335	0.594558	0.595624	0.427254	0.128762	0.472912	-0.137294	0.0724154	0.0565021	-0.260423	3	NA	Homoscedastic & Non-parametric	1.52812e-15	0.663301	0.469906	0.157188	0.991852	0.59327	0.270514
HORVU3Hr1G023970.2	-0.37539	-0.665529	-0.235688	-0.0314264	-0.15813	-0.0872022	0.0268981	0.0620877	0.0546717	-0.182806	-0.264763	0.310881	0.225109	-0.0517797	-0.15638	-0.103879	-0.00639687	-0.158994	-0.0513611	-0.170512	-0.056586	0.175534	-0.230428	0.14581	0.36464	0.186484	-0.00798364	-0.180862	-0.098418	-0.16948	0.40991	0.400571	0.229949	0.168589	0.595283	-0.0536024	0.240047	0.00208413	-0.344922	3	NA	Homoscedastic & Parametric	2.73364e-17	0.9832	0.195731	0.0498353	0.538254	0.480886	0.703841
HORVU7Hr1G096990.2	-0.644754	-0.729478	-0.515744	-0.49242	-0.506855	-0.443216	-0.0742401	-0.048615	-0.199786	-0.30477	-0.543691	0.176291	0.35126	-0.240352	-0.230587	-0.303914	-0.193061	-0.306994	-0.0638766	-0.233547	-0.0229885	0.0261318	-0.203525	0.0590929	0.657295	0.244371	0.2826	-0.0197346	-0.0670732	-0.175656	0.792567	0.580832	0.682995	0.417402	0.700473	-0.204391	0.0400295	-0.238154	-0.394539	3	NA	Homoscedastic & Non-parametric	1.26041e-13	0.105403	0.181583	0.093728	0.609284	0.811227	0.954053
HORVU1Hr1G059970.2	-0.657361	-0.650175	-0.363409	-0.153509	-0.183742	-0.15671	-0.208137	-0.103321	-0.0484358	-0.425609	-0.428912	0.093463	0.0992831	-0.0104938	-0.134109	-0.10057	-0.256486	-0.399169	-0.0154378	-0.197561	-0.187228	-0.00716346	-0.194403	0.082569	0.364752	0.261187	0.0447175	-0.164537	-0.0537237	-0.153699	0.758376	0.935047	0.295432	0.298527	0.745165	-0.217852	0.0258992	-0.345329	-0.519932	3	NA	Homoscedastic & Non-parametric	1.22025e-15	0.401505	0.138668	0.0850501	0.198149	0.524505	0.916328
HORVU2Hr1G063210.2	-0.534168	-0.784818	-0.334729	-0.25827	-0.305739	-0.289986	-0.169169	-0.132494	-0.163446	-0.399889	-0.473218	0.0729136	0.116829	-0.213927	-0.453774	-0.25815	-0.134196	-0.354255	-0.100827	-0.27156	-0.129078	-0.052656	-0.407942	-0.0215442	0.14004	0.190244	-0.0340557	-0.0874284	-0.0487614	-0.125859	0.658071	0.611919	0.114782	0.294815	0.68149	-0.171605	0.105918	-0.12696	-0.344561	3	NA	Homoscedastic & Non-parametric	2.32241e-17	0.558645	0.126295	0.0155327	0.915386	0.2966	0.369791
HORVU3Hr1G113950.3	-0.230818	-0.895266	-0.171843	-0.102622	-0.0829659	-0.091303	-0.222652	-0.140082	-0.0825797	-0.299671	-0.30314	0.0920164	0.0286197	-0.170814	-0.295932	-0.0145954	-0.107272	-0.190793	-0.112677	-0.230186	-0.0833477	0.052094	-0.140546	0.129782	0.20335	0.344718	0.203254	-0.141834	-0.145675	-0.150732	0.263929	0.620643	0.0686453	0.188284	0.530601	-0.0758784	0.191989	-0.267894	-0.492555	3	NA	Homoscedastic & Non-parametric	8.68173e-17	0.409579	0.412587	0.035773	0.560675	0.562804	0.498703
HORVU0Hr1G008280.1	-0.453886	-0.536639	-0.285836	-0.263621	-0.24633	-0.201849	0.0527465	0.0467021	0.039233	-0.144097	-0.179948	0.255019	0.0146308	-0.213755	-0.194601	-0.0225145	0.0220062	-0.158679	0.140612	-0.201441	-0.0319842	0.213226	-0.118086	0.0346989	0.238819	0.34682	0.0471014	0.155254	0.0748931	0.0595112	0.285301	0.583038	-0.0598914	0.15478	0.591383	-0.348798	0.205921	-0.0583025	0.0765116	3	NA	Homoscedastic & Parametric	2.67651e-15	0.347325	0.698942	0.434207	0.65291	0.394742	0.825106
HORVU5Hr1G105870.1	-0.483836	-0.705406	-0.320203	-0.260093	-0.338686	-0.154802	-0.00767386	-0.201599	-0.142989	-0.285756	-0.34936	0.137878	-0.0726127	-0.196075	-0.351873	-0.175077	-0.105545	-0.367599	0.11574	-0.088431	-0.0606153	0.0712566	-0.209823	-0.0459743	0.0876147	0.248245	0.0562449	-0.0607113	0.0700023	-0.200024	0.548528	0.501548	0.0292298	-0.0362396	0.482822	-0.410106	0.1506	-0.0915526	-0.237693	3	NA	Homoscedastic & Non-parametric	9.18433e-17	0.239296	0.231686	0.205024	0.997357	0.399749	0.882267
HORVU5Hr1G092570.1	-0.639363	-0.924622	-0.523477	-0.0769983	-0.333557	-0.583817	0.0757101	-0.0338627	0.0198369	-0.323749	-0.295352	0.198954	-0.203742	-0.172558	-0.402891	-0.179785	-0.0570372	0.139982	-0.105847	-0.197025	0.0170434	0.257308	-0.714074	-0.100369	0.373571	0.393824	0.0111834	-0.341179	-0.164967	-0.198979	0.86361	1.00763	0.109396	-0.0440838	0.998553	-0.505148	-0.0033811	-0.327951	-0.478546	3	NA	Homoscedastic & Non-parametric	2.06086e-11	0.499608	0.601058	0.221082	0.414449	0.598657	0.642897
HORVU2Hr1G019570.1	-0.349771	-0.622697	-0.261723	-0.491084	-0.346169	-0.164504	0.176134	-0.119786	0.00677292	-0.351195	-0.402976	0.095458	-0.163154	-0.0990372	-0.446918	0.0343218	-0.0993077	-0.282218	-0.0124156	-0.320234	-0.180065	0.101361	-0.414099	-0.21777	-0.0247364	0.23472	-0.0125005	-0.081834	-0.148521	-0.114595	0.641557	0.529062	-0.139204	0.0314661	0.684661	-0.0964093	0.574301	-0.228172	-0.343289	3	NA	Homoscedastic & Non-parametric	1.37109e-13	0.850998	0.748515	0.572212	0.269522	0.331262	0.856665
HORVU5Hr1G098960.2	-0.41897	-0.914859	-0.305838	-0.548487	-0.35184	-0.32824	-0.0938516	-0.00444753	-0.0667272	-0.350699	-0.367745	0.265392	0.0496169	-0.11444	-0.346885	-0.371596	-0.187425	-0.477605	-0.0868317	-0.471939	-0.385829	0.130186	-0.285549	-0.0927596	0.0907326	0.376858	-0.172403	-0.17151	0.139429	-0.047362	0.949977	1.19138	0.604917	0.84758	1.42282	0.0553553	0.727167	0.424257	0.232621	3	X405	Homoscedastic & Non-parametric	3.3605e-13	0.915353	0.468181	0.108614	0.011626	0.428693	0.584225
HORVU4Hr1G033200.1	-0.872586	-0.968884	-0.452702	-0.406924	-0.372117	-0.308886	-0.409204	-0.068585	0.0667726	-0.732003	-0.568181	0.0486106	-0.399789	-0.196307	-0.382747	-0.582131	-0.405967	-0.460938	-0.21312	-0.89433	-0.823593	0.0701075	-0.728891	-0.155295	0.613091	0.387123	-0.242684	-0.117805	-0.0998643	-0.381144	1.06401	1.12629	0.715459	0.516141	1.28392	-0.0209614	0.527575	-0.0499934	-0.0735927	3	X405	Homoscedastic & Non-parametric	2.05372e-10	0.390765	0.714606	0.287243	0.108075	0.80955	0.604126
HORVU2Hr1G056360.4	-0.399311	-0.375774	-0.229654	-0.133953	-0.272008	-0.286479	-0.200361	-0.092116	-0.0566278	-0.39682	-0.498462	0.0516099	0.00576142	-0.201275	-0.317995	-0.234772	-0.218338	-0.193076	-0.0754914	-0.114321	-0.135097	-0.151468	-0.324326	-0.00412082	0.17644	0.0337715	-0.133556	-0.317946	-0.109705	-0.272194	0.651086	0.558798	0.0454331	0.332681	0.727541	0.188771	0.445403	0.0903031	-0.1969	3	NA	Homoscedastic & Non-parametric	1.08077e-18	0.548439	0.20453	0.0362654	0.0363377	0.976603	0.582945
HORVU2Hr1G025730.2;HORVU2Hr1G025740.2	-0.554325	-0.561813	-0.38095	-0.734084	-0.657537	-0.24905	-0.160732	-0.153086	-0.46888	-0.675097	-0.585773	-0.0617969	-0.017965	-0.313965	-0.351685	-0.209775	-0.125953	-0.381689	0.192221	-0.0536458	0.0506182	0.101425	0.0278949	0.156435	0.211544	0.120947	0.3381	-0.0219623	0.222193	-0.00110395	0.542733	0.705153	0.298633	0.630042	0.871934	0.0196459	0.281529	0.34912	-0.1777	3	NA	Homoscedastic & Non-parametric	2.45519e-16	0.00152403	0.118062	0.48111	0.00529106	0.698707	0.75529
HORVU1Hr1G064210.2	-1.02535	-1.10703	-0.615138	-0.714607	-1.06703	-0.43497	-0.206726	-0.341199	-0.461462	-0.815249	-0.707286	-0.0174688	-0.0931612	-0.502504	-0.697686	-0.485904	-0.45156	-0.398377	-0.112921	-0.236417	0.133233	-0.454476	-0.0753778	0.323329	0.55335	0.331317	0.249072	0.0961027	-0.0612697	-0.121452	0.81133	0.85023	0.81127	0.795093	1.05958	0.171851	0.342243	0.176185	-0.216136	3	NA	Homoscedastic & Non-parametric	2.91086e-12	0.0067123	0.0701707	0.208565	0.0178113	0.607935	0.890126
HORVU5Hr1G118010.1	-0.51565	-0.557982	-0.461043	-0.448793	-0.44023	-0.317874	-0.253348	-0.363007	-0.363828	-0.56956	-0.644816	0.0369027	0.0115613	-0.668211	-0.507952	-0.346477	-0.192147	-0.202204	0.0304568	-0.216247	-0.0377136	-0.155488	-0.214305	0.174261	0.199858	0.0959634	0.115112	-0.14541	-0.148638	-0.295254	0.388285	0.972422	0.578543	0.740359	1.10803	0.0377887	0.298649	0.000494365	-0.00392465	3	NA	Heteroscedastic & Non-parametric	1.67146e-16	0.021134	0.195292	0.193579	0.0108251	0.870038	0.85488
HORVU3Hr1G117660.2	-0.599831	-0.482801	-0.37173	-0.617142	-0.928304	-0.858289	-0.2776	-0.659004	-0.510224	-1.12732	-0.794431	0.18821	0.0562239	-0.216287	-0.725156	-0.478143	-0.299353	0.0231928	-0.103152	-0.130469	-0.0685905	0.268799	-0.370387	0.236256	0.566311	0.281384	0.204341	-0.447916	0.252457	-0.0455011	0.408703	0.66828	0.223304	0.514996	1.10696	0.183747	0.916007	0.188555	0.0140707	3	NA	Homoscedastic & Non-parametric	1.01413e-11	0.0485658	0.00672982	0.0312459	0.0152418	0.157155	0.435971
HORVU3Hr1G117570.4	-0.718946	-0.580372	-0.333106	-0.185652	-0.844067	-0.770667	-0.285225	-0.595031	-0.153298	-0.961733	-0.886901	0.193289	0.262636	0.0513573	-1.01336	-0.529145	-0.560162	-0.205797	-0.447662	0.0869485	-0.0913767	0.143478	-0.394729	0.13914	0.430948	0.11894	-0.129738	-0.584761	0.127572	-0.44471	1.00687	0.845471	0.317562	0.416233	1.06574	0.354625	0.818099	0.17562	0.0455217	3	NA	Homoscedastic & Non-parametric	4.57344e-12	0.505174	0.00261626	0.00127581	0.0775408	0.212488	0.215469
HORVU3Hr1G117650.1;HORVU3Hr1G117640.1	-0.686365	-0.617798	-0.455344	-0.631459	-0.897301	-0.969728	-0.416271	-0.607587	-0.524604	-0.982538	-0.902616	-0.12657	0.230542	-0.278542	-1.08073	-0.47041	-0.333641	-0.309364	-0.40156	-0.161185	-0.257435	0.183553	-0.653632	0.0729212	0.197045	-0.0365671	0.0863878	-0.423707	-0.0206793	-0.305926	0.849907	1.02981	0.333695	0.4705	1.04882	0.192078	0.39698	0.202079	-0.0856712	3	NA	Homoscedastic & Non-parametric	5.31431e-14	0.110974	0.00377868	0.00184834	0.0211155	0.110769	0.290872
HORVU3Hr1G059830.8;HORVU1Hr1G089730.1	-0.514504	-0.361998	-0.372176	-0.243112	-0.103963	0.00127056	-0.325214	-0.0563314	0.00376031	-0.0639482	-0.453755	0.0964335	0.151002	-0.461612	-0.104949	0.0354824	-0.0538765	-0.330918	-0.0564355	-0.0972233	-0.0215757	-0.0598401	-0.0339533	0.00403766	0.392515	0.190834	0.163887	0.0373901	-0.0160579	-0.137845	0.573578	0.186532	0.28776	0.440948	0.667761	0.000433503	0.155653	-0.0214818	-0.594333	3	NA	Homoscedastic & Non-parametric	2.25244e-16	0.0690751	0.944948	0.471561	0.684989	0.696538	0.596994
HORVU2Hr1G032830.1	-1.05852	-1.04611	-0.227674	-0.642071	-0.44972	-0.708051	-0.5359	-0.185322	-0.272327	-0.481438	-0.310949	-0.138311	-0.0956525	-0.22758	-0.532719	-0.120839	-0.28354	-0.604915	-0.0222634	0.00938973	-0.061011	-0.367035	-0.052229	0.310735	0.171379	0.0974474	-0.35122	0.0162727	-0.0336652	-0.357515	1.3903	0.440411	-0.140839	1.25625	1.56267	-0.209573	-0.237604	-0.485595	-0.547958	3	NA	Heteroscedastic & Non-parametric	1.43182e-11	0.152388	0.307167	0.0871746	0.60902	0.761098	0.521507
HORVU1Hr1G092670.3	-0.301146	-0.855531	-0.259948	0.178694	-0.0168316	0.00101108	0.110094	0.154878	0.0153158	-0.336578	-0.220802	0.124228	-0.0197248	-0.106423	-0.19981	-0.300614	-0.18372	-0.923563	0.142058	-0.263201	-0.141952	0.0699738	-0.115667	-0.0110435	0.241462	0.217552	0.0611886	0.087435	-0.101142	-0.192115	0.37783	0.455112	0.36825	0.151358	0.51284	-0.05081	0.405773	-0.106639	-0.429842	3	NA	Homoscedastic & Parametric	2.016e-14	0.983116	0.629177	0.253952	0.970746	0.748757	0.960213
HORVU6Hr1G088120.3	-0.448118	-0.704733	-0.352976	-0.333099	-0.252502	-0.0901757	-0.0971709	0.0867501	-0.159168	-0.305235	-0.336402	0.0533283	-0.212955	-0.258689	-0.322025	-0.390805	-0.418373	-0.167216	0.33387	-0.248211	-0.0672897	-0.249532	-0.172778	-0.150568	-0.231812	-0.222129	0.172182	0.210164	-0.454322	-0.28313	0.330977	0.498978	0.031892	0.156243	0.657886	-0.389695	0.110476	-0.165816	-0.468577	3	NA	Homoscedastic & Non-parametric	1.63026e-14	0.766008	0.954312	0.599869	0.986558	0.866384	0.377825
HORVU1Hr1G035130.1	-0.348634	-0.24106	-0.220858	-0.269363	-0.0284721	-0.22903	-0.104488	0.0694952	-0.113686	-0.284636	-0.255613	-0.0336976	-0.0922706	-0.244812	-0.0579452	0.0763332	0.0548961	-0.145641	0.227671	0.147493	-0.176209	0.259188	0.00889071	0.0128937	0.0214614	0.270648	-0.47772	-0.210813	0.148703	0.0377184	0.933324	0.369388	-0.280369	0.281351	0.724264	-0.509018	-0.0732813	-0.493928	-0.473574	3	NA	Heteroscedastic & Non-parametric	3.56753e-15	0.28122	0.800571	0.96599	0.188653	0.746859	0.93799
HORVU1Hr1G076420.1	-0.557686	-0.328197	-0.27531	-0.177524	-0.127814	-0.157952	-0.2166	-0.104193	-0.0797438	-0.542521	-0.297737	0.15524	-0.127675	-0.298637	0.0511168	-0.0243245	-0.161335	-0.00955502	0.067898	-0.315609	-0.105543	0.219583	-0.0824824	-0.00476326	-0.356749	0.150295	-0.530962	-0.32447	-0.0515833	-0.114713	0.586408	0.536493	-0.568385	0.216086	0.635158	-0.122938	0.214897	-0.198032	-0.27745	3	NA	Homoscedastic & Non-parametric	1.11762e-14	0.494468	0.38784	0.749042	0.743906	0.105852	0.267347
HORVU7Hr1G052960.1	-0.250633	0.183808	-0.293098	-0.207358	0.0250664	-0.31179	-0.344626	-0.368167	-0.0341327	-0.523468	-0.372944	-0.193546	-0.546705	-0.0718172	-0.15957	0.18434	0.0679518	0.273479	0.239372	0.466646	-0.00683519	-0.013298	0.0247604	0.0289206	-0.283428	-0.0241383	-0.160075	-0.271017	-0.0300102	-0.123777	0.689359	0.36263	-0.522554	0.286881	0.650401	-0.432332	0.030635	-0.628731	-0.592246	3	NA	Homoscedastic & Non-parametric	2.32277e-13	0.10458	0.82116	0.685435	0.484189	0.769031	0.934759
HORVU1Hr1G018060.2	-0.472837	-0.728176	-0.235511	-0.324035	0.110113	-0.183493	-0.180327	-0.287796	-0.0764572	-0.496808	-0.43093	-0.0401244	-0.479309	-0.124057	-0.422962	0.211775	-0.294171	-0.0517861	0.159629	0.245412	0.0641559	0.162539	0.0641474	0.157215	0.103903	0.210761	-0.0745559	-0.107437	-0.134983	0.18371	0.478318	0.701021	0.128405	0.710765	0.647911	-0.233708	-0.0819845	-0.399044	-0.568676	3	NA	Homoscedastic & Non-parametric	1.29463e-16	0.0259205	0.956998	0.268821	0.572373	0.904288	0.330059
HORVU6Hr1G011020.1;HORVU7Hr1G100410.1;HORVU2Hr1G098340.4;HORVU1Hr1G079440.1;HORVU1Hr1G029090.2;HORVU5Hr1G079130.1;HORVU1Hr1G071210.4;HORVU7Hr1G043300.1;HORVU3Hr1G023460.1;HORVU6Hr1G011510.1;HORVU6Hr1G013530.1;HORVU5Hr1G087870.1;HORVU1Hr1G052030.2;HORVU2Hr1G097990.1;HORVU1Hr1G071780.44;HORVU4Hr1G023200.1;HORVU5Hr1G087830.1;HORVU2Hr1G099490.1;HORVU5Hr1G086620.4;HORVU1Hr1G066960.1;HORVU1Hr1G070700.2…	-0.573514	-0.985099	-0.556167	-0.117344	0.29191	-0.360261	-0.454528	0.103558	-0.00277063	-0.932802	-0.316613	-0.234649	-0.372613	-0.566975	-0.463094	0.188817	-0.345391	-0.113142	0.291746	0.34632	-0.112107	0.105218	0.165591	0.0692859	-0.236433	-0.0489762	-0.378039	-0.137283	0.175491	0.222025	0.942614	0.752709	-0.420812	0.688576	0.933685	-0.509573	-0.471659	-0.380954	-0.814494	3	NA	Homoscedastic & Non-parametric	5.4904e-12	0.0583376	0.291754	0.471678	0.391615	0.32106	0.406286
HORVU6Hr1G006140.1;HORVU6Hr1G006130.6;HORVU6Hr1G006090.1;HORVU6Hr1G005960.7;HORVU7Hr1G100400.2;HORVU6Hr1G011490.2;HORVU6Hr1G011620.1;HORVU3Hr1G068240.1;HORVU3Hr1G068320.2;HORVU6Hr1G006080.2;HORVU6Hr1G006120.2;HORVU6Hr1G005940.2	-0.483655	-0.431196	-0.00606592	-0.502167	0.0477076	-0.294932	-0.27404	-0.308996	-0.312234	-0.707611	-0.606061	-0.396275	-0.414007	-0.0811502	-0.453225	0.396248	-0.368411	-0.0668556	0.166077	0.896307	0.145127	0.153154	0.0106212	0.095881	-0.0254045	0.221134	-0.279716	-0.0704195	0.17971	0.196164	0.885236	0.862269	-0.0563031	0.625344	0.611309	-0.205048	-0.277188	-0.539949	-0.842151	3	NA	Homoscedastic & Non-parametric	2.35236e-12	0.0126203	0.724536	0.449508	0.3697	0.869112	0.848166
HORVU7Hr1G030120.1	-0.366844	-0.399586	-0.171959	-0.397293	-0.0194872	-0.387212	-0.261303	-0.258051	-0.259417	-0.569844	-0.488121	-0.492202	-0.264902	-0.15239	-0.47097	0.0122825	-0.490776	-0.206933	-0.0868401	0.596832	0.308411	-0.0600422	-0.202616	0.0614366	-0.633113	-0.156847	-0.230898	-0.266338	0.00375637	0.136086	0.933932	0.817406	-0.0564053	0.182758	0.141351	-0.460146	-0.403242	-0.346276	-0.803749	3	NA	Homoscedastic & Non-parametric	8.43961e-13	0.0952248	0.972276	0.53966	0.291029	0.451822	0.657616
HORVU7Hr1G045240.4	-0.0996956	-0.458425	0.0293646	-1.02043	-0.631925	-0.483726	0.20619	-0.0608531	-0.302145	-0.249183	-0.500008	-0.368963	-0.0789471	-0.345727	-0.287475	-0.0756687	0.0239311	0.000280992	0.332147	-0.253997	0.0356046	0.281975	0.16601	0.0221433	-0.0336907	0.135915	-0.050208	0.115069	-0.0240793	-0.0347256	-0.165406	0.0404011	-0.267111	0.0139098	0.253666	-0.187465	0.252854	-0.33594	-0.746824	3	NA	Homoscedastic & Parametric	8.17973e-13	0.131768	0.733871	0.837356	0.566957	0.553706	0.475559
HORVU2Hr1G025150.1	-0.467723	-0.691186	-0.121191	-0.465344	-0.333427	-0.0678636	0.0174934	-0.17638	-0.301783	-0.305465	-0.474994	0.131815	0.177143	-0.154704	-0.23938	0.0885861	0.112291	-0.479918	0.287914	0.0799154	0.170484	-1.39934	0.27575	0.392366	0.48013	0.577999	0.304085	0.232522	0.256684	0.0161067	-0.742835	-0.0968091	0.319608	0.395981	0.178758	-0.255458	0.216533	-0.192196	-0.406628	3	NA	Homoscedastic & Parametric	1.02332e-10	0.0529473	0.300241	0.391038	0.759831	0.799642	0.772335
HORVU7Hr1G022230.1	0.149774	-0.337796	-0.61828	-0.196844	-0.272733	-0.147149	-1.05828	-0.150231	-0.783396	-0.469405	-0.497391	-0.526245	-0.61314	-0.563219	-0.861057	0.908769	0.664979	-0.0790151	0.138714	0.54142	0.289492	-0.438505	0.376487	0.715099	0.905864	0.529825	0.457363	0.913729	0.596529	0.694694	-0.185733	0.302104	0.237414	0.0395376	0.560969	-2.49439	-1.4875	-1.03704	-1.2548	3	NA	Homoscedastic & Parametric	3.02154e-07	4.14061e-06	0.448846	0.88224	0.0409311	0.406319	0.165019
HORVU6Hr1G022170.1	-0.402453	-0.30574	-0.362945	-0.436578	-0.136265	-0.216357	-0.137293	0.0370748	-0.11659	-0.124869	-0.272923	-0.0802483	0.0793658	-0.153879	-0.00925373	0.124143	0.194418	-0.233884	0.301214	0.0416692	0.0575302	-0.713144	0.194596	0.240121	0.164731	0.389232	0.271082	0.326389	0.288818	0.142961	0.00810423	0.233451	0.0353195	0.352505	0.488531	-0.644239	-0.212476	-0.478875	-0.733669	3	NA	Homoscedastic & Parametric	2.86194e-14	0.00796412	0.81086	0.97072	0.0857737	0.491098	0.583784
HORVU7Hr1G106900.1	-1.09394	-1.08724	-0.790012	-1.41386	-1.42734	-0.428526	-0.783504	-0.608294	-0.637556	-0.782972	-0.54521	-0.253309	0.0112435	-0.536928	-0.93608	-0.173246	-0.0524441	-0.0316845	-0.0408236	0.343764	0.289502	-1.72205	0.385949	0.884498	0.819238	0.261385	0.486543	-0.101368	0.340958	0.0483285	0.645734	0.841755	1.11412	0.990895	1.04082	-0.659392	-0.725219	-0.347971	-1.08675	3	X588	Homoscedastic & Non-parametric	2.16195e-10	9.00221e-05	0.119099	0.336972	0.498084	0.736422	0.964641
HORVU3Hr1G089420.1	-1.28532	-1.00031	-1.01114	-1.39755	-1.11139	-0.831424	-0.942999	-0.755718	-0.810588	-1.04901	-0.787543	-0.629699	-0.162053	-0.617659	-0.598078	-0.433405	-0.448147	0.46297	0.201759	0.632649	0.246748	-0.927258	0.71243	1.29025	1.00044	0.0809811	0.838425	-0.302649	0.699459	0.139629	0.358234	0.470659	0.751861	0.976115	0.965899	-1.50983	-1.26668	-1.0239	-1.47637	3	X588	Homoscedastic & Non-parametric	2.7535e-12	5.84776e-08	0.136507	0.519598	0.0067612	0.134665	0.667618
HORVU5Hr1G092260.1	-0.373819	0.128643	-0.328663	-0.285632	-0.101222	-0.00701353	-0.122862	0.120206	-0.291922	-0.0854485	-0.286212	0.0751981	0.030139	-0.516926	0.361474	0.0708422	-0.0474285	-0.286612	0.205216	-0.00425838	0.105586	0.608054	0.725202	0.405219	-0.169948	0.256426	0.184349	0.307345	0.11789	0.000517231	0.196124	0.382087	0.142895	0.624566	0.750355	-0.283602	0.0492147	0.0221714	-0.408078	3	NA	Homoscedastic & Non-parametric	2.26954e-13	0.0785053	0.75952	0.201057	0.797704	0.793676	0.4732
HORVU2Hr1G094400.5	-0.497759	-0.283274	-0.504292	-0.551063	-0.131263	-0.0561263	0.116592	-0.0940295	-0.16708	0.0622511	0.250111	-0.319602	-0.174015	-0.305465	-0.0811028	-0.0914333	-0.0961322	-0.0755445	0.480982	0.136608	-0.00286351	0.514011	0.359744	0.115477	-0.164802	0.273965	0.177635	0.265148	0.0474674	-0.104939	-0.000350113	0.254863	0.275989	0.141851	0.31471	-0.685815	-0.703735	-0.358196	-0.648081	3	NA	Homoscedastic & Parametric	1.7261e-13	0.00476494	0.181808	0.0175266	0.239272	0.832156	0.212818
HORVU1Hr1G042020.1	-0.609858	-0.331239	-0.63564	-0.291702	-0.0797038	-0.0055081	-0.159594	-0.209733	-0.213775	-0.037713	-0.204275	0.0563232	-0.282637	-0.301722	-0.42748	-0.0748545	0.0419263	-0.0893265	0.320186	0.105268	-0.0972883	0.338988	0.194626	-0.169763	-0.241385	0.252494	0.0224438	0.241816	0.163447	0.0541242	0.12024	-0.0417784	0.154663	0.0023642	0.195886	-0.596225	-0.169057	-0.0830846	-0.277229	3	NA	Homoscedastic & Parametric	3.96364e-16	0.0394464	0.657961	0.667121	0.967676	0.354416	0.716868
HORVU5Hr1G094500.1;HORVU6Hr1G087190.1;HORVU4Hr1G009040.2	-0.361294	-0.125235	-0.174495	-0.695072	-0.479313	-0.0724974	0.222835	-0.178808	-0.502312	0.27375	-0.732876	-0.072777	0.264345	-0.218699	-0.0183016	-0.106507	0.172526	0.0674797	0.2519	0.266331	0.271898	0.515169	-0.0206838	0.0811484	-0.421187	0.424569	0.0624372	-0.234026	0.0224584	-0.157153	0.227854	0.460248	-0.0176033	-0.213527	-0.0935712	-0.774764	-0.157236	-0.09688	-0.506935	3	X1568	Homoscedastic & Parametric	1.75863e-11	0.38195	0.725262	0.862228	0.359017	0.352707	0.863827
HORVU1Hr1G078480.6;HORVU1Hr1G078530.3;HORVU7Hr1G110170.1;HORVU7Hr1G110310.1;HORVU7Hr1G110090.1;HORVU3Hr1G013680.1;HORVU4Hr1G070240.1;HORVU3Hr1G013530.1;HORVU6Hr1G015760.1;HORVU1Hr1G091370.1;HORVU6Hr1G008320.1;HORVU6Hr1G005950.2;HORVU3Hr1G034060.1;HORVU0Hr1G006420.1;HORVU6Hr1G015790.1;HORVU7Hr1G110190.1;HORVU6Hr1G006110.1	-0.41647	-0.14922	-0.25316	-0.588568	-0.414853	0.0953859	-0.244217	-0.227073	-0.265008	0.25002	-0.782743	0.00751461	0.0974535	-0.389919	-0.188706	0.0147341	0.230439	0.139656	0.336465	0.188225	0.25269	0.767406	0.347228	0.0646328	-0.71747	0.417371	0.118559	-0.238952	-0.0717894	-0.620237	-0.138314	0.396982	-0.241234	-0.205778	0.261331	-0.699361	-0.224917	-0.318511	-0.392927	3	X1568	Homoscedastic & Parametric	4.30449e-10	0.482506	0.96221	0.920239	0.456978	0.223873	0.465699
HORVU5Hr1G097150.1	-0.214769	-0.516416	-0.323583	-0.305467	-0.268993	-0.295463	-0.161753	-0.351811	-0.111204	-0.275412	-0.26198	-0.115544	-0.236774	-0.267881	-0.469786	-0.236486	0.00714552	-0.114207	0.0866334	-0.146159	-0.035639	1.62985	-0.291516	0.0319702	-0.140605	0.124409	0.00503443	-0.0570069	0.0516267	0.0499501	0.0812263	0.292177	0.142821	0.0171363	0.407874	-0.392701	0.00637847	-0.173481	-0.32361	3	NA	Homoscedastic & Non-parametric	9.20692e-10	0.380609	0.980811	0.7149	0.888526	0.213765	0.816896
HORVU7Hr1G042300.1	-0.472821	1.70566	-0.0768772	0.130358	-0.307539	-0.24813	-0.534123	-0.737862	-0.373591	-0.457097	-0.55096	-0.323657	-1.08048	-0.452069	0.0325691	-0.0783175	0.184706	0.50348	0.167392	0.147602	0.0278965	0.100695	0.0465747	0.026698	0.0132833	0.259557	-0.031236	0.0686814	0.126723	0.154356	0.460499	0.422969	0.271554	0.0859617	0.472698	-1.17415	-0.591471	-0.615563	-0.615772	3	NA	Homoscedastic & Non-parametric	2.1439e-07	0.252986	0.615129	0.0419895	0.219023	0.611551	0.204216
HORVU2Hr1G025670.1	-0.107262	0.282385	-0.67228	-0.124742	-0.0900515	-0.235606	-1.1463	-0.721828	-0.592079	-0.657061	-0.60369	-0.0559428	-0.545858	-0.189625	-0.828136	0.179073	-0.0164551	0.622616	-0.110744	0.324752	0.102857	0.223461	-0.467928	0.185716	0.310767	0.234315	0.258464	-0.308986	0.168161	0.00199706	0.895041	0.522644	0.192225	0.889111	1.27696	-1.25146	-0.733573	-0.210826	-0.868522	3	NA	Homoscedastic & Non-parametric	5.75149e-10	0.0280507	0.64007	0.601942	0.107607	0.963923	0.996577
HORVU5Hr1G111410.1	0.341271	0.227584	-0.572723	0.321761	-0.157826	-0.267206	-0.449185	-0.975454	-0.187675	-0.24446	-0.385515	-0.271334	-1.0673	-0.263049	-0.556915	0.0572764	-0.167044	-0.0576117	0.100206	0.600848	0.3853	-0.0216559	0.139383	0.015192	0.01072	-0.0134235	-0.0751888	0.0659331	-0.0603275	-0.0399704	0.554825	-0.0308249	-0.163434	-0.0786266	0.478681	-0.858139	-0.203275	-0.53033	-0.369676	3	NA	Homoscedastic & Parametric	1.62907e-09	0.051419	0.62905	0.863476	0.535623	0.400609	0.878917
HORVU7Hr1G036000.9	-0.397247	-0.306573	-0.0414813	0.0544659	0.206516	0.148716	-0.16128	-0.00711619	0.119897	0.00729457	-0.0960114	0.194525	0.197579	-0.137335	-0.0906299	-0.313513	-0.033314	0.226915	0.222606	-0.18822	-0.350282	-0.079727	0.0362716	0.109223	-0.333337	0.0767624	-0.0524004	-0.0650211	0.102221	-0.0653017	-0.0727794	-0.169144	-0.419539	0.00895173	0.00884405	-0.201235	0.107691	0.101951	-0.328996	4	NA	Homoscedastic & Parametric	2.28489e-18	0.294463	0.599225	0.19551	0.303689	0.775403	0.144367
HORVU3Hr1G050400.4	-0.263651	-0.632719	-0.0321277	0.508035	0.079578	-0.277784	0.34103	0.262464	0.19986	-0.183044	-0.0448945	0.496327	0.308376	0.139513	-0.424926	-0.390666	-0.482187	0.19026	-0.289881	-0.412045	-0.510995	0.414703	0.482557	0.219312	-0.0315459	-0.472095	-0.538163	-0.589971	-0.374696	-0.726271	0.467235	-0.0297389	-0.69935	0.0571114	0.375902	0.0741243	0.450665	0.191363	-0.314799	4	NA	Homoscedastic & Non-parametric	1.02295e-09	0.0487929	0.275754	0.0632799	0.501413	0.621585	0.122795
HORVU4Hr1G008470.1	-0.0940614	0.136784	0.0294178	0.155523	0.238537	0.0148745	0.225669	0.0625945	0.0382805	-0.0423509	-0.158971	0.221827	-0.00878223	-0.208752	0.0832701	0.0378338	0.000195703	-0.274377	0.197026	0.189971	0.184022	-0.0481724	-0.132684	-0.041436	-0.20634	-0.0606687	-0.342827	-0.00285455	-0.0591384	-0.0238826	-0.0771803	-0.0985223	-0.4339	-0.220933	0.164523	0.0510901	0.400555	-0.104458	-0.292193	4	NA	Homoscedastic & Parametric	4.24234e-18	0.289385	0.998279	0.854125	0.941906	0.695513	0.722807
HORVU6Hr1G081850.3	-0.142114	0.21886	-0.01447	0.308116	0.230025	0.147299	0.203794	0.162049	0.00104802	-0.0492923	-0.0540614	0.28507	0.00985475	-0.124888	-0.0832916	-0.00407132	-0.0680252	-0.314241	-0.0401287	0.0361904	0.00643241	-0.0321917	-0.108369	-0.0341481	-0.154425	-0.0448995	-0.311422	-0.205237	-0.14379	-0.121083	-0.154148	-0.225744	-0.476054	-0.405644	-0.211254	0.0192466	0.30248	-0.0671316	-0.358208	4	NA	Homoscedastic & Parametric	1.58368e-20	0.0348418	0.554572	0.907342	0.288636	0.465019	0.906951
HORVU4Hr1G059390.1	-0.20442	0.202498	-0.0863929	0.0847135	0.0182722	0.0242953	0.200405	0.0421683	0.0182493	-0.0868924	-0.0273315	-0.00172576	-0.336659	-0.21388	-0.299189	-0.0604584	-0.0404088	-0.419346	0.0920959	-0.180702	-0.00287437	0.27138	-0.173728	-0.158467	-0.301862	0.0538931	-0.456789	-0.0256331	-0.151661	-0.0683551	-0.0572543	-0.188716	-0.420963	-0.503691	-0.0178666	-0.0970113	0.307126	0.027484	0.0252212	4	NA	Homoscedastic & Parametric	1.55448e-18	0.220367	0.553405	0.201996	0.112018	0.148998	0.96525
HORVU5Hr1G060620.1	-0.262091	0.0654355	-0.0757075	0.274759	0.224492	-0.000685944	0.0649366	0.378163	0.10942	0.0266411	0.0862208	0.115331	-0.268412	-0.203418	-0.0123386	-0.478137	-0.287479	-0.162853	0.197809	-0.233182	-0.25588	-0.0258127	-0.143987	-0.220864	-0.392538	-0.201012	-0.336728	-0.0729149	-0.260637	-0.22185	-0.176514	0.192238	-0.148777	0.093204	0.396	-0.0460133	0.304008	0.113806	-0.0267662	4	NA	Homoscedastic & Parametric	2.0402e-17	0.0461208	0.267161	0.618163	0.368493	0.70966	0.559638
HORVU7Hr1G075700.2	0.0350024	-0.473977	0.0760903	0.340747	0.312542	0.19347	0.104622	0.134293	0.100195	-0.165611	0.0315469	0.162029	-0.218262	-0.00763841	-0.1308	0.087933	-0.0942617	-0.311493	0.147644	0.025792	-0.0613255	-0.0727407	-0.172063	-0.197294	-0.057195	-0.0256026	-0.420722	-0.155474	-0.0795159	-0.0684738	-0.144579	0.040237	-0.320283	-0.0480395	0.291394	-0.193249	0.419646	-0.134284	-0.191087	4	NA	Homoscedastic & Parametric	4.9713e-17	0.105392	0.940607	0.357269	0.540692	0.694014	0.361619
HORVU3Hr1G070850.1	-0.23547	-0.617086	0.0423447	0.963059	0.150681	0.146566	0.16541	0.484955	-0.0906982	-0.108159	0.367382	0.131196	-0.328267	-0.198334	-0.237802	-0.189724	-0.286638	-0.459466	-0.0714594	0.176266	-0.13585	-0.385762	-0.344341	-0.370136	-0.392137	-0.415614	-0.612301	-0.331317	-0.374761	-0.233789	0.11846	0.363652	-0.18144	-0.0754575	0.477802	-0.0324997	0.555911	-0.0212699	0.0124193	4	NA	Homoscedastic & Non-parametric	5.81987e-11	0.0293716	0.52123	0.361691	0.828471	0.788649	0.460971
HORVU2Hr1G081670.4	-0.08666	-0.212126	-0.0173795	0.30669	0.149408	0.140215	0.196715	0.185513	0.118413	0.0830214	0.0372099	0.179046	-0.0517898	-0.0752513	-0.0956508	-0.128509	-0.0258242	-0.329493	0.0490605	-0.0616322	0.0121244	0.0534541	-0.0903241	-0.237677	-0.193282	-0.0991677	-0.494168	-0.21485	-0.155433	-0.0615606	-0.0601562	0.0165858	-0.360878	-0.116952	0.247571	0.0779685	0.59293	0.0949989	-0.0690087	4	NA	Homoscedastic & Non-parametric	3.94622e-18	0.0129772	0.881353	0.625837	0.314774	0.394065	0.207496
HORVU3Hr1G003050.1	-0.198797	-0.593993	0.0282066	0.483433	0.24013	0.124656	0.132403	0.550984	0.0140702	-0.0159358	0.050208	0.215225	-0.295952	-0.233314	-0.328698	-0.185686	-0.385617	-0.736225	-0.336306	-0.114962	-0.353522	-0.154958	-0.165006	-0.30357	-0.365257	-0.376159	-0.955041	-0.392728	-0.373469	-0.285043	-0.171523	0.0355495	-0.328872	-0.128566	0.0735354	0.0971571	0.605933	0.258637	0.179423	4	NA	Homoscedastic & Non-parametric	6.73278e-14	0.00760138	0.650511	0.313464	0.182395	0.80902	0.431983
HORVU3Hr1G007500.4;HORVU2Hr1G120170.1	-0.364922	-0.644927	-0.028948	0.849966	0.0957978	0.329857	0.162286	0.405089	-0.0624663	-0.429321	-0.0601386	0.0896499	-0.585821	-0.319277	-0.600311	-0.354381	-0.331895	-0.584169	-0.217355	0.0642431	0.0992955	-0.192287	-0.29317	-0.514466	-0.490348	-0.300532	-0.874131	-0.4774	-0.489704	-0.279693	-0.243629	-0.380915	-0.655147	-0.194401	0.143578	0.537539	0.53257	0.331666	0.114306	4	NA	Homoscedastic & Non-parametric	2.99883e-10	0.0323245	0.578958	0.387485	0.214143	0.493127	0.236906
HORVU5Hr1G095080.8	-0.260628	-0.305826	0.17744	-0.0686038	-0.024354	-0.0598813	-0.0463859	0.187283	0.395116	-0.0244686	-0.152719	0.110221	-0.0062598	-0.118911	-0.17665	-0.0687878	-0.136293	-0.355658	0.112244	-0.108252	-0.249636	-0.322834	-0.228575	-0.272182	-0.140544	0.138124	-0.166005	0.0103758	-0.181518	-0.260177	-0.208864	0.0553854	-0.255384	-0.184943	0.0661143	0.191118	0.626663	0.34564	0.21593	4	NA	Homoscedastic & Non-parametric	7.00086e-19	0.0736899	0.646966	0.121116	0.00552553	0.665868	0.334029
HORVU1Hr1G047930.1	-0.107334	-0.344112	0.191293	-0.0998751	-0.0350446	-0.0953093	0.030755	0.190234	0.135875	-0.340093	-0.138406	0.251252	0.107496	-0.141794	-0.0897898	-0.20864	-0.231019	-0.251749	-0.0670058	-0.356784	-0.285212	-0.369915	-0.272037	-0.358868	-0.206885	-0.0479447	-0.513801	-0.386343	-0.246466	-0.284589	-0.0555282	-0.334149	-0.323992	-0.0970712	0.157905	0.773149	1.09598	0.315552	0.337525	4	NA	Heteroscedastic & Non-parametric	4.3037e-17	0.00273874	0.469341	0.125535	7.29035e-05	0.311218	0.106992
HORVU2Hr1G035830.4;HORVU2Hr1G035810.3	0.0733411	-0.388766	0.0641425	0.0490035	0.106289	-0.027269	0.0324616	0.260427	0.283697	-0.202322	-0.103543	0.249674	0.0826532	0.0541412	-0.353352	-0.0721252	-0.293618	-0.205795	0.0103217	-0.0998626	-0.294906	-0.0252616	-0.17722	-0.194645	-0.403298	-0.476717	-0.508503	-0.168172	-0.31405	-0.401076	-0.37613	-0.593329	-0.814793	-0.362247	-0.0252164	0.326889	0.799181	0.313429	0.500529	4	NA	Homoscedastic & Non-parametric	4.82364e-17	0.00307479	0.91913	0.0428063	0.00455339	0.571257	0.0622965
HORVU0Hr1G017230.2;HORVU6Hr1G081930.1	-0.211125	-0.218081	-0.070715	0.129845	0.0494852	0.3099	0.112089	0.196053	0.0595851	-0.128227	-0.0144461	0.30629	0.0831969	-0.0192868	-0.173501	-0.0416567	-0.275266	-0.385052	-0.316879	-0.0507839	0.0557251	-0.459555	0.145644	-0.159027	0.110732	-0.256224	-0.496979	-0.41649	-0.30016	-0.133008	0.0137028	-0.227104	-0.361715	0.101609	0.0627366	0.261901	0.559437	0.284072	-0.204855	4	NA	Homoscedastic & Parametric	7.20981e-17	0.0676474	0.47997	0.556807	0.212435	0.972529	0.505302
HORVU3Hr1G088570.1	-0.63833	-0.421779	-0.10737	0.0932865	-0.258976	0.136171	0.080131	0.119706	0.05283	-0.0378542	-0.14211	0.21788	0.106288	-0.0955888	-0.092927	-0.144383	-0.384208	-0.260438	0.137837	-0.180995	-0.0338059	-0.421619	0.195658	0.134781	-0.0574783	-0.0940141	-0.325057	-0.447896	-0.239232	-0.0308513	-0.333931	-0.368042	-0.349741	-0.131318	-0.091682	0.00509526	0.289526	-0.0556985	-0.190993	4	NA	Homoscedastic & Parametric	2.79012e-18	0.150404	0.143526	0.292595	0.830729	0.865662	0.128969
HORVU5Hr1G084450.1	-0.509622	0.157265	-0.0908342	-0.0336073	0.351042	0.182029	-0.43479	0.237398	0.598937	0.0907774	0.212862	0.588745	0.0725646	-0.0713584	0.500607	0.176527	-0.202371	-0.164516	0.0910584	0.134908	0.255227	-0.116279	-0.287584	-0.242452	0.44433	0.178773	-0.375579	-0.27142	-0.204332	-0.0939983	-0.110042	0.00320357	-0.0465828	-0.0690097	0.255447	-0.398107	-0.428841	-0.289218	-0.5325	4	NA	Homoscedastic & Parametric	3.85735e-13	0.459667	0.629069	0.828698	0.02073	0.683448	0.847769
HORVU1Hr1G018710.2	-0.0546089	-0.104362	0.0261872	0.0488977	0.160592	0.0940148	0.24796	0.272667	0.441829	0.232579	0.18166	0.273167	0.105556	0.204215	0.174363	0.133386	-0.13544	-0.386731	-0.0115678	0.206227	0.221275	-0.409231	-0.245907	-0.611856	0.242082	-0.145938	-0.148469	-0.347755	-0.227214	-0.42651	0.132227	-0.254935	-0.22347	-0.447851	-0.376203	-0.204211	0.0637588	-0.199203	-0.337322	4	NA	Homoscedastic & Parametric	3.44078e-17	0.116509	0.474519	0.928651	0.0447445	0.339831	0.765273
HORVU5Hr1G021560.1	0.147763	-0.0110018	0.0648585	-0.259661	0.0766297	0.0888442	0.22741	-0.00855462	0.11394	0.135335	-0.0904029	0.0967041	0.280386	0.114831	0.311523	0.155241	-0.0835538	-0.340116	0.235227	-0.214267	0.0461058	-0.208233	0.00920672	-0.242515	-0.0312807	-0.221026	-0.384366	-0.361755	-0.276648	-0.239581	-0.312797	-0.177826	-0.0571489	-0.29495	-0.186654	-0.218361	-0.0021631	-0.233368	-0.551278	4	NA	Homoscedastic & Parametric	9.28844e-20	0.0106634	0.80472	0.659313	0.0121416	0.705509	0.415809
HORVU0Hr1G013160.1	0.0974633	0.108906	-0.129959	0.0249825	0.123821	0.057862	-0.0200381	0.177726	0.205137	0.0940851	-0.245191	0.213473	0.102158	-0.15563	0.15101	-0.0230509	-0.190124	-0.383419	0.128676	-0.130237	-0.0859064	-0.0783033	-0.333753	-0.344506	0.00836143	-0.0651357	-0.354009	-0.11071	-0.0880696	-0.17532	-0.297594	0.123135	-0.0786613	-0.473222	-0.0257294	-0.229228	0.181198	-0.119751	-0.238041	4	NA	Homoscedastic & Parametric	4.38175e-20	0.0692765	0.190862	0.994508	0.309337	0.692798	0.91147
HORVU5Hr1G067630.1	-0.0747965	-0.0827713	0.157923	0.285914	0.275499	0.264307	0.214367	0.0329324	0.302195	-0.0217758	0.0459161	0.376649	0.136894	-0.0743617	0.0423531	0.382267	-0.124706	-0.0851817	0.503146	0.182642	0.29156	0.124648	0.0176174	-0.185283	0.108802	0.131381	0.123102	0.0731534	-0.0395369	-0.213145	-0.024694	-0.167174	0.00412409	-0.365639	0.0253348	-0.0413863	0.193701	0.243003	-0.200002	4	NA	Homoscedastic & Parametric	5.15611e-18	0.244485	0.531485	0.484294	0.326107	0.359674	0.332753
HORVU3Hr1G078930.1;HORVU3Hr1G078920.1	-0.219053	0.0414312	0.258882	0.223605	0.498593	0.145585	0.122622	0.0764059	0.408502	0.221952	0.334537	0.545161	0.042017	0.559061	0.22684	0.255842	-0.101654	-0.144559	0.431753	0.0356017	0.212971	-0.0878719	-0.220795	-0.245728	0.159762	0.154929	0.255098	-0.142325	0.258931	-0.0994794	-0.11713	-0.393318	-0.304706	-0.231988	0.174831	-0.0933471	0.253156	-0.0292821	0.191404	4	NA	Homoscedastic & Parametric	1.74393e-17	0.07549	0.334997	0.203884	0.0743581	0.768461	0.499491
HORVU4Hr1G061650.10	-0.283348	-0.314938	-0.184871	0.0965947	0.174185	0.0971122	-0.0281307	0.0533694	0.324793	0.282746	0.145924	0.28911	-0.086214	0.160746	-0.0669142	0.0636948	0.00600071	-0.331936	0.296416	0.128292	-0.0708315	0.117856	-0.142375	0.0135014	0.261731	0.14688	-0.105232	0.0546268	0.115272	-0.0799269	-0.315826	-0.2525	-0.0914203	-0.324636	-0.0312904	-0.490399	0.0991622	-0.108443	0.131034	4	NA	Homoscedastic & Parametric	5.00614e-18	0.839684	0.584562	0.446451	0.283294	0.65627	0.768195
HORVU1Hr1G037340.1	-0.479481	-0.494189	-0.0359284	0.194856	0.357274	0.295321	-0.402765	0.195537	0.481865	0.137037	0.050175	0.342018	0.0179452	0.150674	0.243602	-0.0305452	-0.269701	-0.269871	0.167613	-0.263923	-0.223911	-0.237792	-0.204866	-0.141685	-0.149622	-0.26354	-0.235674	-0.151229	-0.353816	-0.346215	-0.0117293	-0.671492	-0.276426	-0.0852631	0.165883	-0.422475	0.186092	0.088801	-0.154458	4	NA	Homoscedastic & Parametric	1.71184e-15	0.0265298	0.809129	0.269559	0.221604	0.987472	0.302511
HORVU3Hr1G013400.3;HORVU6Hr1G076630.2	-0.6345	-0.353741	-0.27876	0.0323059	0.172889	0.176143	-0.392869	0.0215925	0.397033	0.135352	0.0716211	0.42267	0.17724	0.0920953	-0.0421853	0.0801298	-0.102734	-0.126789	0.305364	-0.244207	0.13505	-0.170618	-0.0711272	-0.138069	-0.202883	-0.151411	-0.207287	0.0121033	-0.255481	-0.252556	-0.412208	-0.334068	-0.29587	-0.345572	-0.420248	-0.321276	-0.209397	-0.220447	-0.460275	4	NA	Homoscedastic & Parametric	3.46522e-17	0.0254687	0.688771	0.137201	0.00955921	0.321608	0.0353229
HORVU5Hr1G056820.4	-0.0860433	-0.416077	0.0977828	-0.122794	-0.143957	0.0607934	0.212658	0.28387	0.74847	0.0243993	-0.361658	0.0575734	0.369276	-0.0778444	0.164355	-0.0283215	0.105455	-0.203341	0.166853	-0.150912	0.00759639	0.322839	-0.111142	0.0498404	0.0348112	0.233805	-0.116203	0.0394927	0.214123	-0.0014174	-0.0590198	-0.395775	-0.243563	-0.0565804	0.159042	-0.429539	0.114706	-0.503938	-0.109092	4	NA	Homoscedastic & Non-parametric	2.15207e-14	0.682547	0.405495	0.441589	0.0937079	0.983205	0.703837
HORVU3Hr1G008280.1	-0.298851	0.162813	-0.139216	0.287474	0.367809	0.473713	-0.0787183	0.273592	0.332471	-0.117484	0.0405051	0.524507	0.300802	-0.0464132	0.225009	0.0449924	0.0683807	-0.0576352	0.149283	-0.0547227	-0.0251913	0.042482	-0.188657	-0.259681	0.138705	0.291977	-0.199515	-0.0887766	0.269122	-0.045409	-0.232144	0.155449	-0.375787	-0.314811	0.146943	0.367728	0.774084	-0.0329154	0.022221	4	NA	Homoscedastic & Non-parametric	3.35261e-14	0.181929	0.654621	0.853143	0.492685	0.485742	0.988805
HORVU2Hr1G002600.1	-0.27742	0.0954732	0.0863276	0.337179	0.351681	0.330983	0.196358	0.33418	0.42137	0.172796	0.255756	0.304121	0.115503	0.266428	0.481841	0.090352	0.0567146	-0.336813	0.130733	-0.0146689	-0.020175	-0.0521075	-0.048857	0.055812	-0.115639	0.0969376	-0.319619	-0.0993238	-0.165597	-0.136665	-0.353747	-0.282003	-0.259611	-0.00746717	0.262529	0.570871	1.01154	-0.302009	-0.501731	4	NA	Heteroscedastic & Non-parametric	8.58697e-13	0.0720383	0.980478	0.767591	0.588349	0.573339	0.966423
HORVU1Hr1G047220.1	-0.152595	0.0140055	-0.0479106	-0.180615	0.0569714	-0.0339564	0.074163	0.175257	0.403389	0.0964684	0.0790995	0.27639	0.198571	0.174162	0.382373	0.0454739	-0.0845901	0.00359992	0.45081	-0.173704	-0.365931	-0.117712	-0.0591511	-0.245471	-0.0140425	0.12015	-0.0966964	0.0278623	0.109897	-0.19351	-0.313003	-0.153368	-0.482852	-0.258182	-0.219465	-0.0199986	0.287116	-0.131003	-0.0621513	4	NA	Homoscedastic & Parametric	9.92825e-18	0.169038	0.773433	0.884903	0.600558	0.813064	0.764829
HORVU2Hr1G000280.3	-0.1088	0.0353727	-0.144117	-0.064218	0.0730363	-0.00602749	-0.0313524	0.0791765	0.140326	0.0343204	-0.0659521	0.119739	0.296386	0.0592918	0.183568	0.115281	0.0549442	0.047503	0.332051	-0.174472	-0.087492	0.0169705	-0.21167	-0.183234	-0.11187	-0.0491686	-0.268673	-0.289843	-0.0986455	-0.122168	-0.112511	-0.351926	-0.537145	-0.323204	-0.0424672	0.150341	0.471484	0.0233302	-0.0568809	4	NA	Homoscedastic & Parametric	1.46856e-19	0.0428775	0.877592	0.725545	0.335196	0.31766	0.187632
HORVU1Hr1G001950.2	0.0155614	0.0204364	0.0472544	0.131067	0.206623	0.00515713	0.192202	0.0104535	0.333078	0.22785	-0.148415	0.0881582	0.0265839	0.0891276	0.184192	0.0661265	-0.137674	0.0535053	0.404648	-0.194383	-0.320818	-0.0894179	-0.242514	-0.255596	-0.453579	-0.25195	-0.4257	-0.268465	-0.432336	-0.281182	-0.439487	-0.414753	-0.837504	-0.247974	-0.0435624	0.380588	0.774059	0.111613	-0.244059	4	NA	Homoscedastic & Non-parametric	4.45537e-15	0.00681937	0.549154	0.886967	0.14677	0.421312	0.103659
HORVU0Hr1G031700.1;HORVU1Hr1G068020.1;HORVU0Hr1G028680.4	0.0317009	0.0114126	-0.0190206	0.147409	0.348275	0.00887977	0.0198104	0.195026	0.324985	0.151629	0.0113469	0.185822	0.115831	0.00233656	0.214351	0.0692088	-0.0499062	0.192996	0.262404	-0.151843	-0.30171	-0.0110409	-0.258159	-0.390454	-0.199179	-0.110122	-0.350815	-0.296743	-0.265425	-0.194328	-0.646612	-0.313579	-0.657529	-0.443085	-0.0730296	-0.124599	0.382857	-0.12623	-0.187833	4	NA	Homoscedastic & Parametric	3.89475e-19	0.0044338	0.210401	0.752161	0.465512	0.836837	0.130596
HORVU6Hr1G071520.1;HORVU6Hr1G071390.1;HORVU6Hr1G071270.5	-0.0393732	-0.348608	0.0641378	0.16575	0.175697	0.152604	0.198479	0.297731	0.423028	0.0465907	0.0943206	0.391858	0.329644	0.190731	-0.020624	0.106436	0.0162928	-0.238837	0.150499	0.319647	0.206685	0.0728251	-0.344281	-0.0820179	-0.0778759	-0.126371	-0.241076	0.0889238	-0.0794659	-0.124976	-0.403233	-0.206386	-0.549864	-0.415509	0.236658	-0.0964471	0.316009	0.06969	0.00828567	4	NA	Homoscedastic & Parametric	3.52359e-18	0.0457797	0.707352	0.0958704	0.235061	0.580366	0.309693
HORVU4Hr1G057210.1;HORVU4Hr1G057170.5	-0.0475141	-0.433532	0.228425	0.323461	0.128465	0.148222	0.212457	0.0381961	0.252208	-0.209985	0.0292618	0.501603	0.213883	0.406954	-0.0185845	0.124052	0.0214639	-0.254983	-0.0910378	0.229369	-0.0251092	0.0402012	-0.560661	-0.115028	0.146105	-0.0993301	-0.37259	-0.345966	-0.115756	-0.143498	-0.385762	-0.42255	-0.533289	-0.389445	0.477891	0.387207	0.459799	-0.0974846	-0.39082	4	NA	Homoscedastic & Parametric	3.62064e-16	0.0189399	0.0488969	0.0301452	0.174841	0.172847	0.361504
HORVU2Hr1G005590.1;HORVU2Hr1G005520.1	0.01143	-0.404342	0.322492	0.144276	0.238187	-0.0349503	0.503375	0.472464	0.204836	-0.0878251	-0.0918961	0.171702	0.257163	0.194153	0.0366884	-0.0402352	-0.147289	-0.228038	0.174158	-0.410879	-0.182767	0.171155	-0.206323	0.0167223	-0.123235	0.111985	-0.0615472	0.0640454	-0.15298	-0.332329	0.0741116	-0.254293	-0.358839	0.0703881	0.478467	0.0533631	0.246447	-0.0855271	-0.208634	4	NA	Homoscedastic & Parametric	1.01081e-16	0.0166836	0.764914	0.172067	0.155775	0.309074	0.341092
HORVU3Hr1G078270.1	-0.117497	-0.487578	0.0943301	0.115805	0.0699152	0.0115172	0.415193	0.371519	0.236544	0.074711	-0.024586	0.373327	0.413389	0.00576879	-0.0346769	-0.113332	-0.11643	0.140746	0.0374194	-0.479271	-0.291489	0.0573274	-0.0924646	-0.0902371	-0.0256083	-0.00486706	-0.196142	-0.248377	-0.21192	-0.271367	-0.198203	-0.260004	-0.635293	-0.210706	0.178919	0.0705486	0.364482	-0.106482	-0.215155	4	NA	Homoscedastic & Parametric	2.63394e-17	0.00624326	0.55542	0.119249	0.230161	0.355251	0.113276
HORVU6Hr1G074940.1	0.190955	-0.168279	0.104082	0.147069	0.0831967	0.249185	0.340238	0.375483	0.409916	0.0469629	0.00921201	0.456731	0.267032	0.062934	0.04416	-0.101769	-0.118821	-0.393088	-0.0627031	-0.379027	-0.0530529	-0.282521	-0.21974	-0.116633	-0.00751316	0.133984	-0.334932	-0.153847	-0.105505	-0.0620647	-0.379346	-0.0556187	-0.38711	-0.208635	0.0230826	0.0227958	0.190106	-0.0805136	-0.361843	4	NA	Homoscedastic & Parametric	4.98554e-20	0.00107398	0.882937	0.284882	0.0270036	0.709659	0.356445
HORVU7Hr1G034230.5	-0.240107	-0.261058	-0.0236619	0.169308	-0.0435136	-0.0253074	0.208071	0.159084	0.0884871	-0.062641	-0.209086	0.389165	0.354334	0.116817	0.0410896	-0.130771	-0.251643	-0.310196	0.00864473	-0.252481	-0.249466	-0.0772544	-0.286264	-0.20066	0.113798	-0.0742265	-0.177059	-0.189365	-0.0952866	-0.298616	-0.104061	-0.18819	-0.290901	-0.0982855	0.183172	0.00893412	0.265022	0.124522	-0.369236	4	X1998	Homoscedastic & Non-parametric	1.00253e-18	0.00498572	0.0461848	0.0273569	0.118455	0.253305	0.466661
HORVU2Hr1G091440.1	-0.121714	-0.275676	0.114191	0.124326	0.0142643	0.0982941	0.24787	0.214598	0.124287	-0.156577	-0.0166747	0.427278	0.433627	0.0492319	0.221794	-0.357085	-0.34455	-0.333263	0.0590992	-0.539741	-0.305799	-0.216974	-0.261075	-0.249437	-0.332782	-0.0648811	-0.286527	-0.147407	-0.285937	-0.349744	-0.17502	-0.150688	-0.587586	-0.120423	0.0502408	0.150001	0.545065	0.179884	-0.171359	4	NA	Homoscedastic & Parametric	4.00691e-19	6.93548e-05	0.0596872	0.12637	0.714271	0.063444	0.116721
HORVU3Hr1G067290.1	-0.0937922	-0.367906	0.0289002	-0.0573455	0.0898376	0.113872	0.109953	0.213246	0.192811	-0.254236	-0.235724	0.414319	0.337974	0.136404	0.139882	-0.185847	-0.155504	-0.185271	0.0023005	-0.315661	-0.149842	-0.446981	-0.0984261	-0.250703	0.0435941	0.00222941	-0.336514	-0.204348	-0.331929	-0.250233	-0.165013	-0.126569	-0.385213	-0.165667	0.113218	0.175523	0.43869	-0.0925789	-0.489423	4	NA	Homoscedastic & Parametric	9.57708e-18	0.0039144	0.247718	0.0919658	0.299354	0.316456	0.100918
HORVU1Hr1G020140.1	-0.0644116	-0.0237862	0.107195	0.153751	0.112513	0.197073	0.224643	0.128489	0.166936	0.0141264	-0.043874	0.472673	0.207374	0.00312807	0.0614244	-0.00185715	-0.166361	-0.367447	0.00234102	-0.078173	-0.0635529	0.1335	-0.202654	-0.046067	-0.104485	-0.0463712	-0.357862	-0.170018	-0.281244	-0.351341	-0.358954	-0.458118	-0.785922	-0.35263	0.0247236	0.064114	0.41366	0.160335	-0.232781	4	NA	Homoscedastic & Parametric	5.06756e-20	0.00206781	0.227089	0.27798	0.462605	0.119319	0.511069
HORVU2Hr1G080140.3	-0.203441	-0.361857	0.083337	-0.0174556	0.149322	0.0584909	0.138563	0.279443	0.230003	0.0644091	-0.099947	0.2056	0.25044	-0.0102419	0.0929819	0.0403538	-0.113723	-0.326623	0.0430056	-0.306116	-0.24355	-0.000979688	-0.115626	-0.171885	-0.120641	-0.155779	-0.305832	-0.165379	-0.246993	-0.136096	-0.332637	-0.520009	-0.476339	-0.242174	0.0635728	0.0343453	0.310394	0.0407718	-0.137596	4	NA	Homoscedastic & Parametric	1.45961e-20	0.00282035	0.938715	0.187665	0.722202	0.365271	0.159623
HORVU3Hr1G004850.2	-0.0226703	-0.572931	0.0269114	0.195208	0.349234	0.165449	0.191467	0.128631	0.353168	0.103085	-0.0143115	0.411171	0.149854	0.108559	-0.105805	0.0461821	-0.0263388	-0.299676	0.217419	-0.326953	-0.210982	-0.0567785	-0.131473	-0.0971192	-0.0583568	-0.0103296	-0.527401	-0.161671	-0.19043	-0.182364	-0.53028	-0.65677	-0.729061	-0.428491	-0.170611	0.251168	0.676727	0.0187982	0.0378418	4	NA	Homoscedastic & Parametric	1.92316e-17	0.00471843	0.962826	0.086045	0.478625	0.3869	0.0790183
HORVU2Hr1G079960.4	-0.096958	-0.33206	0.0946845	0.0381859	0.125448	0.115294	0.223307	0.166924	0.286398	0.195142	0.0453874	0.249	0.121054	0.183261	-0.022189	-0.0831047	-0.102055	-0.220893	0.146521	-0.152619	-0.233061	-0.108302	-0.220311	-0.28134	-0.304942	-0.159991	-0.392565	-0.169064	-0.285568	-0.267172	-0.467214	-0.712566	-0.714426	-0.342145	-0.253078	0.168867	0.36237	0.109087	-0.0140046	4	NA	Homoscedastic & Parametric	2.67446e-22	8.09978e-05	0.98214	0.15774	0.778805	0.290434	0.0635167
HORVU3Hr1G027910.1	-0.16366	-0.13362	0.168454	0.0712725	0.154544	0.192318	0.388041	0.230632	0.205302	0.192732	0.121387	0.338271	0.388366	0.0595666	0.231305	-0.186145	-0.243465	-0.460949	0.285601	-0.431942	-0.234497	-0.246547	-0.227844	-0.363908	-0.36518	-0.296681	-0.495023	-0.261344	-0.361117	-0.439245	-0.729201	-0.952345	-0.721204	-0.564891	-0.360135	0.287902	0.416211	0.151543	0.0185386	4	NA	Homoscedastic & Parametric	4.64817e-20	1.15299e-05	0.419484	0.670273	0.886133	0.179612	0.167271
HORVU1Hr1G008120.1	-0.252684	-0.471503	0.238004	0.642656	0.30152	0.383601	0.516333	0.336347	0.405575	-0.0347884	0.390298	0.515578	0.250369	0.333979	0.228224	-0.289943	-0.167897	-0.585156	-0.0539787	-0.170211	-0.122465	-0.269626	-0.231129	-0.194076	-0.0154994	-0.35047	-0.553746	-0.366808	-0.532365	-0.38288	-0.177933	-0.340199	-0.461742	-0.291597	0.192169	0.309793	0.420076	-0.140533	-0.225299	4	NA	Homoscedastic & Non-parametric	3.37573e-14	0.000209797	0.147129	0.322026	0.0974585	0.439695	0.529751
HORVU7Hr1G085150.1	-0.168358	-0.34017	0.147188	0.437101	0.197989	0.350327	0.608775	0.271557	0.265524	0.0892128	0.252133	0.396986	0.262252	0.0606974	-0.0050656	-0.246144	-0.288966	-0.787724	-0.190023	-0.258981	-0.0871187	-0.272799	-0.0707178	-0.196287	-0.194234	-0.274886	-0.625825	-0.160848	-0.311017	-0.202189	-0.311001	-0.225025	-0.620947	-0.203833	-0.070803	0.193409	0.573623	0.0631228	-0.00192043	4	NA	Homoscedastic & Parametric	2.9824e-17	0.000412654	0.31658	0.631164	0.74227	0.342116	0.553172
HORVU1Hr1G052430.6	-0.10073	-0.488556	0.238605	0.397324	0.305456	0.343651	0.327533	0.601639	0.463968	0.317899	0.304848	0.352988	0.207068	0.0377063	0.111221	-0.191903	-0.162797	-0.568611	-0.114909	-0.300063	-0.349442	-0.510117	-0.149638	-0.0952811	-0.377535	-0.287567	-0.505435	-0.115877	-0.445908	-0.196942	-0.658067	-0.577645	-0.862309	-0.379048	-0.0186389	0.0562403	0.407137	0.000263109	-0.289946	4	NA	Homoscedastic & Parametric	7.06682e-17	0.000473126	0.490758	0.436827	0.191149	0.890581	0.411062
HORVU3Hr1G014120.1;HORVU0Hr1G006240.1	-0.162543	-0.524538	0.0978741	0.629129	0.314474	0.356205	0.42899	0.580145	0.321531	0.287632	0.228393	0.459231	0.296417	0.140465	-0.0968215	-0.121657	-0.115323	-0.760234	-0.221648	-0.330664	-0.216584	-0.309999	-0.306714	-0.359979	-0.277482	-0.241766	-0.619525	-0.125545	-0.384831	-0.294278	-0.492321	-0.405532	-0.803729	-0.534019	-0.163071	0.0955448	0.329367	-0.127853	-0.186331	4	NA	Homoscedastic & Non-parametric	4.87858e-15	3.93674e-05	0.726627	0.140245	0.0676925	0.172344	0.285078
HORVU1Hr1G089360.2	-0.0971974	-0.29759	0.194812	0.404223	0.408547	0.25005	0.510963	0.57569	0.441617	0.267527	0.296783	0.363006	0.314688	0.156498	0.21011	-0.210922	-0.250499	-0.623051	0.0248639	-0.547759	-0.348419	-0.472826	-0.432023	-0.420763	-0.477465	-0.347541	-0.795226	-0.222527	-0.370649	-0.258902	-0.301212	-0.193137	-0.587332	-0.437163	-0.107064	0.383205	0.657404	0.257227	0.256509	4	NA	Homoscedastic & Non-parametric	1.00326e-16	1.11787e-06	0.71106	0.568133	0.420503	0.209113	0.104068
HORVU5Hr1G082810.1	-0.246166	-0.324753	0.0057275	0.193048	0.0768604	0.0322312	0.211731	0.400467	0.398443	0.147172	-0.024615	0.242282	0.24429	0.173997	-0.0106343	-0.186758	-0.176992	-0.520594	-0.174238	-0.33168	-0.277167	-0.188399	-0.37058	-0.247384	-0.350196	-0.323719	-0.696541	-0.353621	-0.185823	-0.32665	0.099639	-0.462537	-0.565245	-0.418308	-0.0970121	0.194743	0.35789	0.0981695	0.0550942	4	NA	Homoscedastic & Parametric	1.11593e-19	9.91428e-05	0.998843	0.0848675	0.948749	0.581943	0.180042
HORVU1Hr1G055520.3	-0.368448	-0.457079	-0.126573	0.136387	0.123348	0.126231	0.22973	0.584015	0.372531	0.120453	0.103894	0.35852	0.419568	0.0989702	0.0486713	-0.152682	-0.215636	-0.393698	-0.267337	-0.512984	-0.248817	-0.158576	-0.569967	-0.31499	-0.246916	-0.243462	-0.796838	-0.421741	-0.572987	-0.428742	-0.280441	-0.409064	-0.631275	-0.581965	-0.0228433	-0.2921	0.117253	-0.158514	-0.243735	4	NA	Homoscedastic & Non-parametric	2.47362e-15	8.25622e-05	0.945182	0.262022	0.0412493	0.181795	0.22955
HORVU4Hr1G054870.4	-0.263531	-0.231679	0.0291221	0.374515	0.0702273	-0.00102116	0.205191	0.202288	0.111929	-0.0136195	-0.191934	0.423413	0.399175	0.224796	-0.193878	-0.310507	-0.293753	-0.324393	-0.193965	-0.288675	-0.277007	-0.299635	-0.468249	-0.255188	-0.141296	-0.386043	-0.556685	-0.432934	-0.36148	-0.560925	-0.117034	-0.716957	-0.655836	-0.383101	-0.0902293	0.3952	0.581405	0.182348	-0.219906	4	NA	Homoscedastic & Non-parametric	8.62479e-17	4.68668e-05	0.0412903	0.00633427	0.804621	0.302055	0.153871
HORVU7Hr1G074690.1	-0.205994	-0.314386	0.052899	0.435115	0.24428	0.1219	0.332135	0.271262	0.217553	0.366413	0.211291	0.125096	0.101352	-0.0700208	0.126793	-0.174857	-0.293349	-0.401731	0.0948011	-0.55486	-0.298886	-0.377919	-0.274916	-0.344248	-0.492804	-0.204503	-0.59143	-0.168624	-0.375009	-0.218511	-0.0284538	0.200295	-0.479602	-0.254761	0.270165	-0.187912	0.211257	-0.0893385	-0.15129	4	NA	Homoscedastic & Parametric	1.06948e-17	0.000167792	0.646366	0.814676	0.169035	0.516651	0.20239
HORVU1Hr1G017570.5	0.0545394	-0.140438	0.16064	0.613305	0.634373	0.42453	0.490715	0.445879	0.652411	0.523613	0.490347	0.553964	0.183261	0.237649	0.224351	-0.121901	-0.329379	-0.514747	0.128341	-0.408851	-0.35862	-0.184998	-0.333596	-0.363706	-0.362618	-0.2535	-0.499303	-0.102985	-0.396286	-0.368958	-0.210443	-0.383758	-0.5877	-0.30792	0.067609	-0.0438505	0.219997	-0.0617157	-0.0742864	4	NA	Homoscedastic & Non-parametric	1.80454e-16	3.16936e-06	0.378344	0.721052	0.0181732	0.360435	0.292278
HORVU5Hr1G124030.19;HORVU0Hr1G014400.1	0.0377157	-0.0772901	0.117958	0.217136	0.265368	0.102726	0.321367	0.0552717	0.335238	0.215927	0.144197	0.310305	0.0398856	0.170442	0.0252342	-0.0408897	-0.152739	-0.343693	0.220208	-0.244984	-0.186219	-0.254086	-0.311003	-0.316318	-0.0926471	-0.079928	-0.21079	-0.0275681	-0.17842	-0.255546	-0.322155	-0.288526	-0.427081	-0.289857	-0.113053	-0.111058	0.297422	0.0756916	-0.153721	4	NA	Homoscedastic & Parametric	5.88847e-22	0.000316053	0.879187	0.449932	0.149334	0.580141	0.399424
HORVU2Hr1G113460.1	-0.18425	-0.29054	-0.0990788	0.0559548	0.0922803	-0.114972	0.0752206	0.11867	0.455148	0.309153	0.138953	0.219217	0.186719	0.119857	0.190196	-0.15831	-0.343685	-0.165448	0.236708	-0.382149	-0.354848	-0.262525	-0.539512	-0.517771	-0.278472	-0.325515	-0.343848	-0.112747	-0.239496	-0.441685	-0.342906	-0.0568116	-0.777293	-0.627221	-0.221968	-0.176041	0.140272	-0.146371	-0.140588	4	NA	Homoscedastic & Parametric	5.73527e-18	0.00181811	0.511604	0.44553	0.178782	0.952656	0.264845
HORVU5Hr1G098890.10	-0.123261	-0.24441	0.00687614	0.102037	0.269034	0.0454186	0.196812	0.0634375	0.166538	0.0667655	-0.0635546	0.217942	0.317757	0.0759459	0.0585579	-0.115189	-0.181124	-0.113159	-0.00766755	-0.258043	-0.364982	-0.342754	-0.324016	-0.447562	-0.342715	-0.0734508	-0.317583	-0.0476325	-0.273466	-0.212856	-0.296103	-0.142343	-0.470672	-0.293765	-0.02337	-0.0449562	0.313547	-0.199837	-0.332396	4	NA	Homoscedastic & Parametric	2.79306e-21	5.91365e-05	0.546748	0.129476	0.0589996	0.134075	0.0691367
HORVU2Hr1G091680.1;HORVU1Hr1G045920.1	-0.521592	-0.540308	-0.0580139	0.0602833	0.259663	0.19254	0.0894366	0.260807	0.486772	0.0615475	0.00405875	0.549707	0.56323	0.39831	0.686257	-0.00799376	-0.132406	-0.509928	0.167998	-0.730247	-0.771115	-0.655571	-0.450202	-0.560877	-0.0827247	-0.273418	-0.723791	-0.278081	-0.85634	-0.771841	-0.0791521	-0.18666	-0.841403	-0.522169	0.0615108	0.0172264	0.168781	-0.383213	-0.408207	4	NA	Homoscedastic & Parametric	1.30937e-13	0.000315901	0.315059	0.295448	0.0320582	0.136437	0.280963
HORVU1Hr1G074820.1	-0.307607	-0.0587354	-0.0328945	0.229545	-0.0958687	0.231793	0.0221339	0.353282	0.229926	0.0125391	0.00413112	0.298642	0.256904	-0.103788	0.209438	-0.203401	0.0370799	-0.406113	0.10781	-0.217672	0.0153972	-0.279784	-0.0750013	-0.229892	-0.144881	0.13073	-0.374384	-0.166756	0.104459	0.00674741	0.0691544	0.115426	-0.314638	0.0199717	0.17002	-0.150647	0.275792	0.326597	-0.00970609	4	NA	Homoscedastic & Parametric	3.96061e-18	0.0205954	0.483543	0.648637	0.900917	0.37535	0.386961
HORVU2Hr1G021810.1	-0.223135	0.0257835	0.0195184	0.0825589	0.0878066	0.17779	0.0345256	0.0898849	0.250232	0.164893	0.0438794	0.181845	0.230946	0.165359	0.441374	-0.156039	-0.161839	-0.402272	0.317319	-0.45715	-0.303079	0.157422	-0.138388	-0.0885014	-0.218334	0.0634494	-0.393749	-0.145347	-0.212485	-0.118364	0.0449422	0.160367	-0.515124	-0.09448	0.473133	-0.231546	0.253505	0.0311838	-0.0113681	4	NA	Homoscedastic & Parametric	6.76854e-17	0.00752792	0.662902	0.899168	0.397258	0.182126	0.524071
HORVU6Hr1G029540.1	-0.136394	-0.310712	-0.0760105	-0.004963	0.183444	0.0703527	0.0481388	0.28492	0.388191	-0.0228288	0.050558	0.310178	0.17133	-0.00203401	0.0258881	-0.148386	-0.0864142	-0.168818	0.219934	-0.188778	-0.365565	0.139824	0.130416	-0.0554331	0.100006	0.16338	-0.388691	-0.325376	-0.0802445	-0.200995	-0.215911	0.0155753	-0.553899	0.110949	0.486238	-0.153847	0.394579	-0.0421242	-0.132506	4	X1664	Homoscedastic & Parametric	2.832e-15	0.196387	0.639138	0.488228	0.735335	0.995442	0.469851
HORVU2Hr1G124930.1	-0.265032	-0.369951	0.157441	0.0785465	0.0474032	0.0909964	0.0848026	0.112539	0.140878	-0.116753	-0.0750064	0.101688	0.136814	-0.0990333	0.317991	0.11896	-0.111534	-0.185781	0.2537	-0.21143	-0.120417	0.0251943	-0.0648016	-0.0111804	-0.13263	0.0335939	-0.434566	-0.303306	-0.148576	-0.0793787	-0.343339	0.0326621	-0.487702	-0.0550822	0.30006	0.0949053	0.399765	-0.0208093	-0.239747	4	NA	Homoscedastic & Parametric	4.71039e-17	0.0613874	0.498674	0.686489	0.995666	0.238867	0.300183
HORVU5Hr1G084010.1	-0.157122	-0.223891	-0.140421	-0.0762379	0.15097	-0.0189965	0.189629	0.102543	0.283373	0.00157193	0.121731	0.224314	-0.0746985	-0.0851431	0.178463	-0.0454072	-0.0505445	-0.43055	0.374127	-0.202707	-0.255443	0.0503929	-0.236153	-0.404138	0.0666465	0.221645	-0.393704	-0.00675977	0.000589436	-0.0755645	-0.186135	-0.205068	-0.416648	-0.102511	0.363062	-0.174631	0.285829	-0.114924	-0.147732	4	X1593	Homoscedastic & Parametric	1.32022e-15	0.311818	0.421273	0.545323	0.996454	0.638157	0.944206
HORVU6Hr1G092960.5	0.0106112	-0.324104	0.0412053	0.0916491	0.499268	0.0380851	0.388237	0.189712	0.629939	0.420015	0.590233	0.33461	-0.0213299	0.177136	0.266842	-0.0822227	0.0930066	-0.809234	0.328303	-0.376493	-0.601984	-0.334752	-0.533992	-0.70849	-0.276676	0.0817844	-0.725474	-0.296372	0.000822015	-0.0442528	0.226129	-0.611183	-0.852597	-0.0934963	0.775627	-0.336739	0.0726212	-0.261367	-0.455873	4	NA	Homoscedastic & Parametric	5.16701e-11	0.0439052	0.225986	0.641309	0.157493	0.920963	0.972312
HORVU2Hr1G079300.2	-0.19438	0.177448	-0.0522081	0.0674916	0.63731	0.338347	0.124396	0.114141	0.12107	0.328121	0.469532	0.563265	-0.207822	-0.0700925	0.00584227	0.179566	0.382567	0.342659	0.429875	-0.0871098	-0.0680846	0.24104	0.112941	0.0428582	0.214426	0.314803	-0.193424	0.440825	0.156605	0.268985	-0.211908	-0.147964	-0.319839	-0.0402478	0.155761	-0.253314	0.0872021	-0.293361	-0.741349	4	NA	Homoscedastic & Parametric	1.0967e-14	0.734844	0.326866	0.310305	0.0541535	0.481854	0.82897
HORVU3Hr1G034860.2	0.0987286	-0.14728	-0.139656	0.0112145	0.414771	0.377308	0.195835	0.133317	0.430553	0.0378075	0.089897	0.421423	0.136427	0.210375	0.0824052	0.174262	0.118376	0.133187	0.600721	-0.062737	-0.0343844	0.290964	0.235955	0.0616561	0.0883407	0.200935	0.180195	0.429967	0.0507559	-0.0703201	0.027413	-0.347242	-0.244074	0.0880011	0.231735	-0.712054	-0.276597	0.154915	-0.497293	4	NA	Homoscedastic & Parametric	4.3757e-16	0.586524	0.476818	0.936468	0.0115939	0.640856	0.466366
HORVU3Hr1G060780.1	-0.0719125	-0.0848863	-0.206864	-0.0120716	0.159625	0.127015	-0.0324184	0.0798474	0.151045	0.0179206	0.047401	0.276662	0.0998293	-0.0815216	0.0865655	0.0346302	-0.0500948	0.134689	0.579425	-0.0969145	-0.154366	-0.0303662	-0.105282	-0.073068	-0.114383	0.0966891	0.00966633	0.155975	0.00844281	-0.0138423	-0.174876	-0.355222	-0.448035	0.227113	0.295512	-0.442152	0.126537	-0.168649	-0.402695	4	NA	Homoscedastic & Non-parametric	4.13817e-16	0.564611	0.734395	0.963157	0.118389	0.778494	0.399187
HORVU0Hr1G006630.1	-0.182824	-0.212826	-0.110026	-0.143932	0.126442	0.0332978	-0.054833	0.115931	0.235215	-0.0439654	-0.0615468	0.222228	0.111906	-0.107871	0.0913957	0.117005	-0.102231	0.0756468	0.339793	-0.07996	-0.146156	0.0517529	-0.0512106	-0.0353172	0.0996469	0.016114	0.0747068	-0.0348097	0.000214618	-0.137958	-0.460674	-0.127682	-0.236703	-0.0996134	0.246439	-0.436631	-0.0935333	-0.23066	-0.638921	4	NA	Homoscedastic & Parametric	5.95756e-19	0.913178	0.592431	0.71434	0.0109219	0.695138	0.721984
HORVU1Hr1G034980.3	0.0235111	-0.0439498	-0.103256	0.0250571	0.246746	-0.0562571	0.0128032	0.110055	0.112505	0.0295498	0.00509458	0.172358	0.0251102	-0.0694357	0.272197	0.189285	0.0034275	0.54881	0.2923	-0.0169882	-0.0146524	0.0780382	-0.083809	-0.130228	-0.0898098	0.253112	-0.244446	-0.0560317	0.174763	-0.0382503	-0.255151	-0.024987	-0.376211	-0.0746858	0.224042	-0.421316	0.167496	-0.192527	-0.484573	4	NA	Homoscedastic & Parametric	3.96838e-17	0.58969	0.431888	0.80462	0.119323	0.742324	0.270066
HORVU2Hr1G071180.1	-0.0147111	0.000480783	-0.0469845	0.0192402	0.141107	-0.101906	-0.18267	0.0758783	0.105454	0.0538732	-0.0367418	0.0426755	0.0448458	-0.0626921	0.0157159	-0.0577604	-0.0420893	0.188639	0.352333	-0.377521	-0.250102	0.00623515	-0.17105	-0.170655	-0.116139	0.149469	0.174697	-0.181107	0.0811122	-0.0453408	-0.483539	-0.138797	-0.463172	-0.248231	0.129176	-0.538127	0.0281273	-0.372535	-0.33262	4	NA	Homoscedastic & Parametric	8.89279e-19	0.531217	0.485095	0.588038	0.0268942	0.848993	0.300128
HORVU1Hr1G044000.1	0.0459986	0.125792	0.370883	0.208181	0.178737	0.00829816	0.441752	0.417677	0.33514	0.469841	0.34454	0.31991	-0.028486	0.226013	0.152768	-0.0217837	-0.0411654	0.0249158	0.317007	-0.127489	-0.2278	0.0849668	-0.222336	-0.13854	0.173508	-0.388106	0.00294478	0.207403	-0.222955	-0.00705432	-0.166759	-0.741939	-0.449531	-0.274724	0.0252695	-0.449005	-0.0509748	-0.45076	-0.792747	4	NA	Homoscedastic & Parametric	3.58772e-18	0.0287722	0.511828	0.982309	0.000134033	0.787104	0.793171
HORVU7Hr1G034010.2	-0.156766	0.307907	-0.123388	0.211046	0.181291	0.327624	0.167654	0.217416	0.320826	-0.186383	0.185054	0.260241	0.224343	-0.251384	0.325691	-0.246895	0.0916557	-0.0713334	0.281308	-0.0299835	-0.133987	0.460765	0.280747	0.164982	-0.0952103	0.334534	0.0382353	-0.00755128	0.0838117	-0.0388398	-0.187637	-0.254158	-0.751224	-0.0307265	0.349529	-0.19208	0.219245	0.0239783	-0.538654	4	NA	Homoscedastic & Parametric	7.14396e-15	0.77025	0.941293	0.186892	0.299591	0.622968	0.449631
HORVU4Hr1G027740.1	0.0364923	-0.382232	0.283951	0.339741	0.157667	0.278921	0.642641	0.2589	0.356051	0.330115	0.198441	0.425951	0.271358	-0.0238332	0.389515	0.087289	0.123177	0.280578	0.59709	-0.175827	0.14063	0.355532	0.2777	0.393869	0.105262	0.604747	0.162699	0.0409249	0.374984	-0.0879069	0.0131407	-0.36594	-0.29386	0.0623786	0.559685	-0.0704949	0.382789	-0.0380325	-0.352822	4	NA	Homoscedastic & Parametric	6.37458e-14	0.627029	0.831684	0.978627	0.165534	0.648998	0.743814
HORVU3Hr1G055870.2	-0.125194	-0.138366	-0.0433896	0.152829	0.252477	0.210772	0.233127	0.197494	0.108382	0.0748098	-0.0199144	0.196217	0.0363947	0.0334445	0.0883224	-0.000206652	0.0916643	-0.012324	0.285966	-0.193099	-0.184471	0.0714031	-0.0174916	-0.180966	-0.122088	0.206646	-0.167084	0.0374007	0.0352476	-0.0903076	-0.233956	-0.519315	-0.212597	0.113759	0.207394	-0.0639532	0.211971	-0.0122329	-0.2873	4	NA	Homoscedastic & Parametric	1.23419e-19	0.0679942	0.765181	0.969782	0.344226	0.253934	0.426706
HORVU4Hr1G012540.1	0.00852779	-0.0665246	0.0350169	0.00217377	0.170242	0.0906345	0.126719	0.273403	0.225548	-0.0666345	-0.162114	0.361437	0.204324	0.0287089	0.30624	-0.218551	0.158844	-0.279444	0.239075	-0.66001	-0.366412	-0.13899	-0.17365	-0.238126	-0.296638	0.180742	-0.14066	0.0605497	0.0249464	-0.0966099	0.0307488	-0.0473912	-0.400114	-0.0651189	0.0184333	-0.205913	0.293574	-0.198909	-0.408483	4	NA	Homoscedastic & Parametric	7.65967e-18	0.0067422	0.965256	0.583318	0.0796795	0.172233	0.318859
HORVU3Hr1G008420.5	-0.31401	-0.15782	-0.079407	-0.0142209	-0.0592933	-0.0188108	0.08235	0.104581	0.135771	-0.0540763	-0.211646	0.313495	0.287921	-0.0691446	0.149071	-0.0489946	-0.0215724	-0.120948	0.192097	-0.252267	-0.176033	-0.0858018	-0.145233	-0.108014	0.0529569	0.19045	-0.0309592	-0.135244	-0.0576366	-0.181173	-0.137348	-0.177381	-0.281034	-0.190767	0.215362	-0.0415241	0.240315	-0.26121	-0.38394	4	NA	Homoscedastic & Parametric	4.47264e-19	0.123535	0.248701	0.262661	0.115123	0.238779	0.43763
HORVU2Hr1G030820.1	-0.179756	-0.310636	-0.000569289	-0.0703761	0.0503789	-0.012775	0.112107	0.154681	0.0669197	-0.114182	-0.265375	0.208542	0.168466	-0.2188	0.0593854	-0.134674	-0.0502995	-0.204315	0.21918	-0.223594	-0.317398	0.0885903	-0.0746676	-0.0653504	-0.0425016	0.117422	-0.0982558	-0.0274566	-0.0153829	-0.115864	-0.0239633	-0.0950788	-0.367132	-0.188113	0.0607002	-0.0801263	0.210583	-0.225996	-0.383098	4	NA	Homoscedastic & Parametric	1.8289e-19	0.287241	0.806283	0.347367	0.256842	0.44624	0.50453
HORVU4Hr1G077420.1	-0.22296	-0.159424	-0.0978974	0.0915631	0.0633762	-0.0934013	0.0625396	0.324523	-0.175684	-0.208707	-0.282961	0.167735	0.181522	-0.286921	0.149542	-0.0567558	-0.043106	-0.136314	0.223322	-0.224944	-0.155338	0.0849589	-0.0639063	-0.0984378	-0.139756	0.102553	-0.174942	0.00325076	-0.0159851	-0.119803	-0.232445	-0.377191	-0.49552	-0.213194	0.128889	0.07445	0.359564	-0.180536	-0.500004	4	NA	Homoscedastic & Parametric	5.57255e-17	0.251922	0.692985	0.53868	0.713251	0.282542	0.376338
HORVU5Hr1G114510.6	-0.203721	0.0547111	-0.103896	0.156975	0.35994	0.0341192	0.132076	0.192912	0.0616349	0.0295257	0.237731	0.265782	0.0109119	-0.134459	-0.0292857	0.0445334	-0.0265446	0.122225	0.327947	0.0439112	-0.0548097	0.162599	0.112522	-0.0671194	-0.0507063	-0.100409	-0.206331	-0.00831918	0.0431521	-0.00440664	-0.26364	-0.114736	-0.18477	-0.232444	-0.0623878	-0.0296391	0.338843	-0.0850776	-0.190323	4	NA	Homoscedastic & Parametric	5.03101e-20	0.3622	0.579588	0.663649	0.813398	0.969591	0.434698
HORVU5Hr1G048100.4	-0.0364186	-0.11116	0.00107913	0.446936	0.314054	0.118951	0.317685	0.488436	0.229501	0.0259913	0.0760679	0.302962	-0.19049	-0.176927	-0.110905	-0.0208342	0.0210172	0.140382	0.213926	-0.102021	-0.0700298	0.205121	-0.0481221	-0.192472	-0.0790535	0.158396	-0.162959	0.141802	-0.0562381	-0.127056	-0.335789	-0.167469	-0.584869	-0.128221	0.182238	-0.166076	0.337043	-0.185968	-0.382068	4	NA	Homoscedastic & Parametric	2.07495e-16	0.127143	0.350702	0.803309	0.240396	0.649373	0.374826
HORVU5Hr1G062090.1	-0.103908	-0.05449	-0.0607561	0.272468	0.272664	0.130766	0.203765	0.202179	0.206233	0.0364247	0.106039	0.3095	-0.10706	0.0694409	0.0128796	0.0927181	-0.0488774	-0.211639	0.30889	0.0139663	-0.109887	0.174981	-0.142848	-0.205501	-0.0171628	0.0508406	-0.349681	0.0104397	-0.101121	-0.0288577	-0.308955	-0.0531547	-0.443686	-0.131001	0.373164	-0.184402	0.363327	0.0172864	-0.295326	4	X1593	Homoscedastic & Parametric	2.14462e-17	0.0802368	0.849993	0.84223	0.410678	0.396898	0.506092
HORVU7Hr1G048470.2	-0.22465	-0.220661	0.0153888	0.220202	0.0946201	0.0154122	0.158398	0.00194776	0.267365	0.144369	-0.0509299	0.248723	-0.0753964	-0.0364141	-0.0486288	0.0517528	-0.00638486	-0.26884	0.273011	0.0568274	-0.0717361	0.0919097	-0.0992764	-0.269229	0.0480944	0.127359	-0.220512	0.00913033	0.0806399	-0.086768	-0.343766	-0.185728	-0.325473	-0.112222	0.115653	-0.190326	0.230625	-0.0978558	-0.383898	4	X1593	Homoscedastic & Parametric	2.60888e-19	0.218542	0.885512	0.327768	0.139577	0.419946	0.436059
HORVU4Hr1G021190.1;HORVU4Hr1G021230.1	-0.00538458	-0.0396813	-0.0559444	0.0174886	0.280366	0.123274	0.230088	0.181755	0.0516894	-0.0945622	-0.119375	0.414963	0.087664	-0.0559642	0.0823138	-0.00803189	-0.0712951	-0.154668	0.32897	-0.0975173	-0.0328959	0.139297	-0.0717547	-0.0850476	-0.0412385	0.131222	-0.261554	-0.0246981	-0.0658995	-0.0461091	-0.262076	-0.234102	-0.370114	-0.225535	0.073915	-0.230167	0.335276	0.0549022	-0.279531	4	NA	Homoscedastic & Parametric	5.41724e-19	0.0820112	0.971381	0.762197	0.384303	0.365409	0.337907
HORVU2Hr1G026840.1	-0.0252843	-0.205891	-0.120854	0.0201817	0.0169993	0.0101958	0.0319248	0.111657	-0.0608073	-0.13144	-0.1339	0.168102	-0.00386222	-0.16385	-0.0992757	0.0212545	-0.133184	-0.0494877	0.104331	-0.0210448	-0.0682134	0.0062581	0.0274878	-0.197982	-0.287902	-0.0822296	-0.49195	-0.179136	-0.171996	0.0796296	-0.401566	-0.283261	-0.448404	-0.178341	0.0902357	-0.223751	0.28782	-0.0224598	-0.389405	4	NA	Homoscedastic & Parametric	2.26786e-20	0.0443459	0.998321	0.525523	0.629272	0.293724	0.034692
HORVU5Hr1G117760.1;HORVU0Hr1G014210.1;HORVU5Hr1G001170.1;HORVU0Hr1G014240.2	-0.106131	-0.200096	-0.0415969	0.109427	0.210372	0.211105	0.168273	0.12379	0.171089	0.00360232	-0.093167	0.317856	-0.0016073	-0.0459889	0.00444166	0.0505968	-0.242418	0.213926	0.354625	-0.151052	0.0289255	0.0527511	-0.102631	-0.146731	-0.146735	-0.0142438	-0.126842	0.0249947	-0.276224	-0.180859	-0.310342	-0.158413	-0.280645	-0.0673964	-0.0562927	-0.132621	0.192753	-0.0909283	-0.329943	4	NA	Homoscedastic & Parametric	3.34848e-20	0.0248569	0.909366	0.622408	0.160585	0.378037	0.0504491
HORVU3Hr1G055350.1	-0.0309447	-0.199252	-0.0597106	0.0520501	0.151791	0.0605284	0.028172	0.138223	0.228426	-0.0309899	-0.0372954	0.170031	0.175517	0.108617	0.201302	0.104691	-0.0853477	-0.107694	0.344968	0.00186257	-0.00665999	0.111933	0.0418249	-0.178895	-0.0307116	0.0262989	-0.0341046	-0.0154337	-0.0897168	-0.163575	-0.109913	-0.235686	-0.278546	-0.0503075	0.0272542	-0.10821	0.295416	0.018888	-0.0946214	4	NA	Homoscedastic & Parametric	4.94069e-22	0.0800071	0.969368	0.378312	0.542678	0.468793	0.166997
HORVU6Hr1G027650.12	-0.046135	-0.250273	-0.0947175	0.232422	0.302754	0.0859698	0.0142001	0.195504	0.17782	0.0523165	0.0617132	0.256365	0.0793648	0.0451729	-0.00882566	0.106898	-0.0281602	-0.211587	0.145418	-0.00185878	0.073982	0.102032	-0.0614911	-0.124172	-0.0474584	-0.0280248	-0.30561	-0.0259094	-0.25733	-0.0997823	-0.162439	-0.159622	-0.232209	-0.100943	0.0866052	-0.248556	0.190711	-0.149833	-0.35337	4	NA	Homoscedastic & Parametric	5.2342e-22	0.00849293	0.696324	0.158483	0.0186334	0.316295	0.0661206
HORVU7Hr1G017190.1	-0.03274	-0.317094	-0.128788	0.0604383	0.224652	0.137799	0.00321953	0.154881	0.252144	-0.00930782	-0.0014768	0.25033	0.0442122	-0.0894882	0.0609569	0.0745789	-0.0961443	-0.08188	0.175089	0.00468236	-0.0563009	0.237639	-0.0250104	-0.085697	-0.0309072	-0.0754246	-0.428388	-0.249002	-0.212443	-0.177875	-0.220782	-0.271773	-0.296397	-0.208382	-0.00448255	-0.1664	0.365354	-0.254943	-0.127072	4	NA	Homoscedastic & Parametric	6.03397e-19	0.124155	0.386935	0.649442	0.612583	0.848046	0.309985
HORVU3Hr1G016420.3	-0.188847	-0.321337	-0.0372235	-0.0128278	0.0904975	0.0444281	0.132141	0.110045	0.132966	-0.0969367	-0.183002	0.288364	0.211987	-0.0154163	0.00138964	0.0628981	-0.221534	-0.184937	0.074614	-0.078361	-0.118499	0.327609	0.0213231	-0.0499699	-0.0446985	0.151983	-0.16484	-0.220518	-0.361176	-0.380944	-0.335928	-0.255996	-0.268781	-0.170882	0.0949029	-0.052071	0.253126	-0.129261	-0.214451	4	NA	Homoscedastic & Parametric	3.99757e-19	0.0492566	0.466174	0.17881	0.308921	0.123451	0.268183
HORVU5Hr1G117080.1	-0.137709	0.161499	-0.123942	-0.143386	0.210619	-0.107605	0.0951703	0.0124697	0.296924	0.0576953	0.0551937	0.354526	-0.0477155	0.00776181	0.203373	0.0589032	-0.00599615	0.0843577	0.653777	0.148799	0.0235485	0.277983	0.0222332	-0.163348	0.106966	0.182484	-0.136862	0.124174	0.243601	-0.0223431	-0.382891	-0.373759	-0.273752	-0.0939009	0.162486	-0.406141	0.362394	-0.176694	-0.372327	4	NA	Homoscedastic & Parametric	4.70458e-15	0.849018	0.599256	0.652891	0.40718	0.963549	0.732782
HORVU2Hr1G025980.2	-0.101384	0.0899289	0.0454484	-0.063317	0.0887583	-0.0187426	0.156226	0.0241297	0.269396	0.103926	0.0774966	0.0673827	0.0617604	-0.000554149	0.141281	0.0492435	-0.0134094	-0.1873	0.329654	0.013613	0.00932548	-0.0186624	0.105084	-0.0275693	0.129912	0.196147	-0.271137	-0.0556176	0.078718	0.113487	-0.390808	-0.231642	-0.249835	-0.0352643	0.15892	-0.196354	0.204194	-0.200967	-0.343987	4	NA	Homoscedastic & Parametric	3.49275e-20	0.742717	0.53015	0.471584	0.188291	0.897641	0.857314
HORVU7Hr1G097550.2	-0.115556	0.0981258	-0.00666318	-0.0544894	0.113146	-0.0627688	0.0931014	0.14312	0.171152	0.050277	0.0475843	0.0644897	0.115442	-0.0118411	0.108597	-0.0311745	0.0748274	-0.0457501	0.311552	-0.210094	-0.209827	-0.0270346	0.0243822	-0.14067	-0.0544079	0.0882862	-0.216073	-0.111373	0.0348537	0.0551111	-0.233582	-0.0727729	-0.237915	0.0426545	0.210486	-0.165453	0.210741	-0.143026	-0.352853	4	NA	Homoscedastic & Parametric	3.68381e-21	0.147881	0.54128	0.684318	0.22405	0.665482	0.387568
HORVU1Hr1G067230.1	-0.0580823	-0.350043	0.178649	0.0632061	0.1993	0.14417	0.561122	0.272512	0.226367	0.0840123	0.0191097	0.659307	0.313194	0.0966825	0.0716116	0.313607	0.0410186	-0.34941	0.263543	0.117016	0.160173	0.19889	0.0339106	0.0149438	0.365545	0.267693	0.136214	0.19562	-0.0640057	-0.0373382	-0.306529	-0.167241	-0.0442339	-0.09498	0.03828	0.0615052	0.398607	0.1477	-0.328188	4	NA	Homoscedastic & Parametric	6.20648e-17	0.234632	0.322775	0.22773	0.191326	0.254965	0.684926
HORVU7Hr1G102480.7	0.00862951	0.0277901	-0.00411229	-0.00367125	-0.0244585	0.0562793	0.250882	0.189214	0.255971	0.166132	0.0281369	0.317898	0.453877	0.16521	0.111411	0.0394738	0.124985	0.000808092	0.280311	0.111518	0.088464	0.122531	-0.0597666	0.0241938	0.200921	0.16077	-0.0886328	-0.0352588	0.076592	-0.0538416	-0.247562	-0.290573	-0.303071	-0.135109	0.104221	-0.108786	0.216258	0.00890592	-0.224633	4	NA	Homoscedastic & Parametric	7.87245e-22	0.14892	0.39369	0.256595	0.031206	0.466382	0.47049
HORVU6Hr1G087000.1	-0.0428757	-0.191941	0.0739367	-0.0769015	0.110255	-0.0308741	0.24561	0.0755771	0.338766	0.0698901	-0.0275872	0.314779	0.37866	0.0639306	0.0806952	0.114232	0.105449	-0.102729	0.398359	0.0636441	-0.0579108	0.203653	-0.0802187	0.0568679	0.206797	0.38868	-0.016916	0.0233383	0.13967	-0.0601608	-0.497684	-0.307503	-0.162349	-0.0910174	0.269278	-0.117243	0.237474	-0.0992691	-0.275027	4	NA	Homoscedastic & Parametric	2.99619e-18	0.54834	0.691888	0.242459	0.103431	0.437384	0.62802
HORVU2Hr1G082800.1	0.176038	-0.16476	0.130692	-0.0452099	0.00879892	0.00445349	0.281773	0.2455	0.0706674	-0.0789179	-0.0588164	0.28186	0.2741	0.000524452	0.14207	0.139257	0.111854	-0.106626	0.241367	0.00416576	-0.00836779	0.16125	-0.0891561	0.125005	-0.0417561	0.127785	-0.128989	-0.109136	0.078688	0.0376969	-0.520474	-0.460592	-0.388835	-0.0243616	0.398973	-0.0550644	0.334557	-0.148822	-0.499717	4	NA	Homoscedastic & Parametric	4.54511e-17	0.335635	0.715112	0.502455	0.165984	0.492848	0.596463
HORVU3Hr1G028060.2	-0.0944109	-0.22242	0.115353	-0.120899	0.198423	0.0445334	0.103676	0.193227	0.182647	-0.0413329	0.0452404	0.253327	0.384592	-0.0253507	0.0129121	0.0288283	0.0152791	-0.214211	0.312675	-0.167666	0.0517801	-0.0844155	0.0289459	-0.0229747	0.0986546	0.124308	-0.0977331	0.149476	-0.0395309	-0.109616	-0.357943	-0.295259	-0.243161	-0.193256	0.0939747	-0.0610797	0.335487	-0.152137	-0.23777	4	NA	Homoscedastic & Parametric	1.26033e-19	0.104743	0.695929	0.213361	0.201019	0.385723	0.190318
HORVU3Hr1G081590.2	-0.131655	0.0778344	0.0329823	0.0477427	-0.00322018	0.0459499	0.148469	0.21108	0.175234	-0.0788478	-0.0720673	0.259358	0.186979	-0.0707354	0.0331687	0.004856	0.0104455	-0.194607	0.1866	-0.0484101	-0.0877928	-0.0633241	-0.0929561	-0.115829	0.0877307	-0.00500468	-0.212383	-0.0782581	0.00784118	-0.110075	-0.359666	-0.405595	-0.283127	-0.226345	-0.0611228	-0.0515791	0.331592	-0.031135	-0.305882	4	NA	Homoscedastic & Parametric	8.19532e-22	0.100897	0.522391	0.578918	0.321453	0.511645	0.701271
HORVU2Hr1G037770.2	-0.010126	-0.19417	0.0658766	-0.0438097	0.114567	0.0669458	0.446248	0.110125	0.289606	0.07297	-0.0951269	0.368935	0.313651	-0.0391934	0.115617	-0.00706287	0.0864047	0.21012	0.281941	-0.0846702	0.0679726	0.145858	0.102466	0.0906193	0.0900601	0.0459819	0.0413086	-0.208439	-0.246355	-0.171909	-0.743375	-0.28976	-0.382393	-0.340711	-0.0295642	-0.124483	0.108937	-0.353851	-0.383869	4	NA	Homoscedastic & Parametric	1.56564e-18	0.17187	0.820125	0.598587	0.0185108	0.720343	0.270192
HORVU6Hr1G093310.1	-0.180298	0.0665728	-0.0633553	0.148235	0.120882	0.0491775	0.224877	0.189259	0.0654142	-0.0308983	-0.0671327	0.243985	0.0910586	-0.0670369	0.0427527	0.0686922	-0.00563284	-0.204811	0.302079	-0.0718615	0.0527065	0.309301	-0.146367	0.0723691	0.211234	0.160661	0.0617398	0.27711	0.0694716	-0.0248423	-0.132089	-0.186488	-0.290723	-0.150949	0.168653	-0.199348	0.24893	-0.355228	-0.161593	4	NA	Homoscedastic & Parametric	8.964e-20	0.96538	0.710906	0.924829	0.124095	0.337005	0.702439
HORVU2Hr1G048070.2	-0.146408	0.0462579	-0.0198205	0.045866	0.130335	0.0500092	0.0674145	0.118921	0.284486	0.0343644	-0.00558113	0.276223	0.199879	0.0571653	0.127713	0.0838967	0.0405441	-0.0227165	0.320513	-0.051046	-0.145626	0.0237917	-0.109081	-0.0626003	0.0478357	0.262514	0.00299249	0.0803163	0.0562616	-0.0820523	-0.394326	-0.0104521	-0.260234	-0.206024	0.199155	-0.145163	0.27446	-0.212866	-0.273859	4	NA	Homoscedastic & Parametric	2.3565e-20	0.241114	0.793985	0.546784	0.0849118	0.366236	0.654181
HORVU5Hr1G074900.1	-0.160886	-0.113315	-0.0454409	-0.0406672	-0.0123142	0.0666496	0.119749	0.221779	0.300492	0.105127	-0.0194057	0.113402	0.248902	0.0430154	0.167911	0.0757306	0.0499908	-0.00289772	0.309154	-0.0513861	0.059118	0.0775828	0.0017188	0.00250602	0.0364775	0.0917416	-0.170335	0.0489514	-0.0245953	-0.105386	-0.235982	-0.153353	-0.385618	-0.360777	0.134786	-0.191827	0.191298	-0.193971	-0.26063	4	NA	Homoscedastic & Parametric	6.7573e-21	0.255789	0.720397	0.823854	0.101396	0.572891	0.370867
HORVU7Hr1G073060.2	-0.180602	0.152058	-0.176138	-0.0474118	0.100328	-0.0520332	0.11734	0.125329	0.106612	-0.0786512	-0.215416	0.227115	0.152653	-0.0122084	0.115494	0.0657259	-0.0878692	0.039761	0.411222	0.0658666	-0.0197305	0.291043	-0.215664	-0.16559	0.00198778	0.191786	-0.0152272	0.182431	-0.0661266	-0.215057	-0.196865	-0.200277	-0.549668	-0.439213	0.159978	-0.269885	0.0978918	-0.249827	-0.509434	4	NA	Homoscedastic & Parametric	9.85148e-18	0.559704	0.889189	0.958932	0.0682665	0.263381	0.72795
HORVU3Hr1G002920.2	-0.176457	-0.306752	-0.140401	-0.144739	0.164607	-0.0233466	0.100684	0.187663	0.2351	0.0151889	0.200841	0.322445	0.102218	0.172845	0.0335171	0.0837854	0.10199	-0.192826	0.332352	-0.157545	-0.0762582	0.0626725	-0.129732	0.0457252	0.300482	0.288604	-0.148953	0.23236	0.218174	0.0638435	-0.190987	-0.12578	-0.389282	-0.211579	0.14662	-0.278422	0.156516	-0.126952	-0.410415	4	NA	Homoscedastic & Parametric	1.17046e-17	0.930122	0.871307	0.598824	0.103754	0.645094	0.945084
HORVU2Hr1G074220.1	-0.22992	-0.434319	-0.0607628	0.137483	0.349295	0.18718	0.0845695	0.161954	0.109596	0.151237	0.102565	0.32342	0.207576	0.0420636	-0.145566	0.158415	0.207455	-0.322484	0.308312	0.189806	0.0505347	0.253393	-0.0402527	0.0358601	0.192592	0.518806	0.0733497	0.316294	0.465629	0.176106	-0.391298	-0.222924	-0.454998	-0.347716	0.0180804	-0.243738	0.215935	-0.218159	-0.428817	4	NA	Homoscedastic & Parametric	2.66143e-17	0.591285	0.896982	0.214404	0.0504954	0.482251	0.985323
HORVU3Hr1G073870.1	-0.163139	-0.227938	-0.120953	0.00186206	0.203652	0.0858319	0.17252	0.175044	0.241724	0.0406645	-0.0559537	0.342007	0.182145	0.0328028	0.052641	0.129663	0.183835	-0.19978	0.322938	0.0181277	-0.0784456	0.263458	-0.0867504	-0.00230787	0.0640358	0.299987	-0.0488662	0.00405498	0.221689	0.120837	-0.621937	-0.156145	-0.46274	-0.498341	-0.129621	-0.355678	0.105887	-0.441785	-0.618141	4	NA	Homoscedastic & Parametric	8.68981e-19	0.692857	0.92217	0.444228	0.00418405	0.438554	0.704144
HORVU2Hr1G050980.2	-0.0854149	-0.311252	-0.0545504	-0.0310682	0.0776574	-0.01903	0.193323	0.289385	0.188713	0.0107613	0.0368113	0.147436	-0.0206532	-0.0299131	-0.0839679	0.109901	0.134328	-0.253712	0.230501	-0.0156447	-0.127778	0.456822	-0.317036	-0.0781982	0.133013	0.344231	-0.0728512	0.113413	0.329616	0.0364549	-0.200194	-0.213662	-0.598565	-0.349055	0.0806333	-0.328402	0.135969	-0.282889	-0.467802	4	NA	Homoscedastic & Parametric	1.68659e-17	0.584747	0.395416	0.791905	0.110059	0.599229	0.520696
HORVU2Hr1G111520.2	-0.160674	-0.298745	-0.151171	-0.175339	-0.00953321	-0.0344897	0.0345369	0.0771642	0.0773864	0.0504768	-0.125137	0.211684	0.182888	0.00404469	0.0050346	0.0556867	0.105217	-0.0814197	0.268406	-0.0167913	-0.0519628	0.165549	0.0641283	-0.0511446	0.188426	0.276705	-0.0193203	0.169426	0.189169	-0.0715111	-0.335552	-0.29516	-0.255548	-0.264824	-0.0437594	-0.280271	0.242626	-0.214073	-0.241613	4	NA	Homoscedastic & Parametric	8.34806e-21	0.668051	0.880148	0.282667	0.203211	0.379868	0.598579
HORVU3Hr1G070690.1	-0.266736	-0.342176	0.0326436	-0.0742486	0.139685	-0.0970555	0.15705	0.0985378	0.326302	0.0857794	0.0658957	0.220566	0.253936	-0.0160647	0.091824	0.0711882	-0.0284764	-0.242735	0.289191	-0.0269155	-0.00117116	0.21951	-0.018484	-0.156954	0.0857248	0.150041	-0.017825	0.0903659	0.298218	-0.000287068	-0.276669	-0.607293	-0.365221	-0.238322	-0.081193	-0.436366	0.0674015	-0.217197	-0.252406	4	NA	Homoscedastic & Parametric	4.88293e-19	0.674985	0.99858	0.344488	0.0245531	0.696709	0.629223
HORVU6Hr1G075510.1	-0.130261	-0.196942	-0.0251283	0.00624868	-0.0210496	0.091641	0.278695	0.0326637	0.0965694	-0.0869107	-0.151349	0.3675	0.0649233	0.063257	-0.0916122	0.0760085	0.124693	-0.17345	0.300394	0.121736	0.140613	0.265532	-0.0283086	-0.124652	0.216974	0.251985	-0.0168421	0.0318228	0.0286759	0.0214238	-0.361193	-0.466969	-0.378824	-0.45703	-0.0869544	-0.217523	0.303933	0.0708593	-0.288791	4	NA	Homoscedastic & Parametric	1.50838e-19	0.608889	0.250292	0.316639	0.301832	0.129245	0.432088
HORVU6Hr1G075010.9	-0.148942	-0.212482	-0.118617	-0.131634	-0.107226	0.0751277	0.0612227	0.0624797	0.181248	-0.0998317	-0.171095	0.332022	0.152226	-0.0473037	-0.0653997	0.0734731	0.198491	-0.127605	0.361347	-0.116849	0.0992647	0.000311427	-0.0324413	-0.0918766	0.121138	0.217839	0.0229167	0.084414	0.118522	-0.00530172	-0.339964	-0.462725	-0.435044	-0.328702	0.0296546	-0.128539	0.234325	-0.0248065	-0.40553	4	NA	Homoscedastic & Parametric	4.86129e-19	0.745719	0.54144	0.331128	0.337141	0.260884	0.293235
HORVU3Hr1G112450.1	-0.0424237	-0.187305	0.0309336	-0.122843	0.155989	0.141423	0.0314429	-0.0725379	0.0632476	-0.0238781	-0.142466	0.331028	0.010937	-0.0901776	0.155615	0.232604	0.159849	-0.192788	0.30416	0.271244	0.0606512	0.201041	0.183957	0.00416302	0.166539	0.186983	0.114863	0.136089	0.141227	-0.0316123	-0.422596	-0.435987	-0.408466	-0.149881	0.0999694	-0.383651	0.150936	-0.227716	-0.202956	4	NA	Homoscedastic & Parametric	1.34828e-19	0.301247	0.822132	0.733505	0.0961106	0.633473	0.798559
HORVU0Hr1G010040.2	-0.0630217	-0.0691358	-0.0597007	-0.138103	0.13907	0.167993	0.216336	0.0780948	0.063998	0.0628085	0.00229758	0.296609	0.206692	-0.109022	0.178225	0.139007	0.0853277	-0.151412	0.388811	0.0160994	-0.0526697	0.312989	0.0451711	0.151716	0.0477165	0.234856	-0.0316772	0.162222	0.105818	0.137669	-0.351651	-0.156191	-0.577174	-0.0467873	0.175663	-0.310371	0.196105	-0.190529	-0.49583	4	NA	Homoscedastic & Parametric	2.76876e-18	0.935319	0.94765	0.628296	0.082042	0.414504	0.862059
HORVU3Hr1G040360.1	-0.166317	-0.122393	-0.134746	-0.0756213	0.185975	0.0426413	0.0927328	0.170644	0.0482371	-0.0267403	-0.0399735	0.239846	0.176771	-0.0642358	0.0553771	0.0984517	0.070253	-0.318578	0.432919	0.119831	-0.000609635	0.152237	0.0857843	-0.0259171	0.0410595	0.30604	0.0829566	0.319294	0.32787	0.101138	-0.30414	-0.254216	-0.520841	-0.180807	0.154784	-0.403115	0.113887	-0.0472803	-0.35842	4	NA	Homoscedastic & Parametric	7.83394e-18	0.489935	0.917636	0.806575	0.145678	0.653165	0.964076
HORVU5Hr1G082460.4	-0.305736	-0.240766	-0.120744	-0.201328	0.0934548	-0.0615517	0.163849	0.132265	-0.0168141	-0.236533	-0.131854	0.210815	0.0904791	-0.149583	0.0982912	0.104903	0.0499313	-0.339218	0.201192	0.150844	-0.0101883	0.132332	0.0681125	-0.0690041	-0.0238644	0.249261	-0.075847	0.163707	0.213927	0.106387	-0.312452	-0.159745	-0.500944	-0.147703	0.00225173	-0.319612	0.0819892	-0.0450908	-0.250939	4	NA	Homoscedastic & Parametric	5.8383e-19	0.500848	0.772582	0.988724	0.394462	0.364665	0.855231
HORVU4Hr1G050700.3	-0.0438372	-0.122761	-0.00989301	-0.0839174	0.256716	0.140689	0.275975	0.238247	0.484905	0.132923	-0.0154457	0.464887	0.231603	-0.023989	0.281522	0.178838	0.289522	-0.271576	0.430459	0.099687	0.122207	0.0077796	-0.0171013	-0.0618467	0.0962677	0.493316	-0.0777664	0.092138	0.391432	0.338498	-0.195288	-0.150091	-0.608572	-0.172163	-0.0882394	-0.326413	0.0845757	-0.0778264	-0.517362	4	NA	Homoscedastic & Parametric	4.91562e-16	0.818503	0.473607	0.940396	0.0493132	0.878908	0.783851
HORVU0Hr1G000510.3	-0.0723838	-0.328261	-0.108672	-0.0271611	0.197981	0.1144	0.0267201	0.116773	0.175308	-0.0687765	-0.0440251	0.445502	-0.0839908	-0.117913	0.115955	0.0686099	0.0775655	-0.325401	0.464563	0.054908	-0.0404516	0.0179442	0.0136777	-0.152204	0.275014	0.42383	-0.139113	-0.00890249	0.234438	0.0985208	-0.274046	-0.224134	-0.409522	-0.155775	0.0383078	-0.421941	0.217491	-0.198986	-0.463226	4	X1573	Homoscedastic & Parametric	1.25569e-15	0.843199	0.793023	0.709312	0.156823	0.898527	0.794922
HORVU7Hr1G026370.1	-0.0787825	-0.0643436	-0.125618	-0.00648903	0.262822	0.124333	-0.0797912	0.117278	0.108446	-0.0881518	0.00724084	0.286549	-0.0361644	-0.0856544	0.287258	0.0498683	0.0590619	-0.0378442	0.462204	-0.0688347	-0.0165731	-0.0161784	0.0862558	-0.139913	0.0121411	0.242865	-0.0684458	0.0835709	0.158544	0.0606461	-0.289673	0.0140111	-0.346697	-0.118026	-0.0293898	-0.315022	0.196602	-0.117124	-0.513945	4	X1277	Homoscedastic & Parametric	2.67777e-18	0.77732	0.606973	0.66569	0.163811	0.759343	0.541591
HORVU3Hr1G060480.2	-0.262245	-0.0180759	-0.166739	0.0152961	0.117828	0.0147293	0.054159	0.00589006	0.17915	-0.0147196	-0.0855344	0.211579	0.0123925	-0.017867	0.127038	0.144638	0.0336759	-0.0246981	0.279234	0.0759157	-0.00748316	0.0336913	0.198166	-0.0241219	0.0956396	0.244277	0.0139552	0.0625643	0.0334	0.0266707	-0.10537	-0.117	-0.419759	-0.212776	0.0194833	-0.35465	0.0540614	-0.297435	-0.489949	4	X1277	Homoscedastic & Parametric	8.29042e-22	0.777817	0.970977	0.960113	0.00846531	0.545466	0.626731
HORVU3Hr1G050290.1	-0.218218	-0.0673287	-0.210826	-0.188977	0.172424	0.0394695	0.0458866	0.0414162	0.0533696	-0.0975107	-0.172376	0.22488	-0.0326757	-0.116331	-0.000155309	0.119828	-0.030993	-0.144532	0.267552	-0.0140072	-0.0987557	-0.0637487	0.130918	-0.243563	0.0238976	0.122133	-0.113973	0.101946	-0.0221536	-0.0178713	-0.126076	-0.268309	-0.464596	-0.169972	-0.0209381	-0.378839	0.0921906	-0.179899	-0.428126	4	X1277	Homoscedastic & Parametric	4.91522e-20	0.877939	0.582415	0.776643	0.164324	0.592003	0.551279
HORVU3Hr1G053300.1;HORVU3Hr1G035530.1;HORVU5Hr1G007340.2	-0.0760835	0.126921	-0.0236792	0.0795304	0.346442	0.106693	0.253271	0.179454	0.256151	0.0895717	0.20062	0.35821	0.0780026	0.0286841	0.159753	0.18285	0.142772	0.153971	0.465645	-0.143154	0.00899685	0.413966	0.15511	-0.00290091	0.137339	0.127538	-0.0640194	0.102815	0.0867667	0.0424599	-0.380384	-0.196432	-0.459011	-0.0534686	0.223651	-0.0682178	0.377216	-0.135692	-0.43219	4	NA	Homoscedastic & Parametric	7.88636e-18	0.387536	0.62297	0.597107	0.263678	0.413432	0.522667
HORVU3Hr1G070550.5	-0.0690422	0.0734452	0.0593877	0.0771094	0.195552	0.0534031	0.150963	0.242684	0.0899155	-0.0566022	-0.0736608	0.164572	0.145341	-0.104312	0.0159515	0.184903	0.0838755	-0.0996776	0.228725	-0.187997	-0.291107	0.251295	0.179224	-0.116393	-0.182688	0.119114	-0.309706	-0.0880059	-0.0227809	-0.0338733	-0.302662	-0.309932	-0.529197	-0.225925	0.0938518	-0.22667	0.203844	-0.205893	-0.389595	4	NA	Homoscedastic & Parametric	4.55011e-20	0.0323879	0.879201	0.792836	0.064925	0.0816763	0.196459
HORVU3Hr1G050990.2	-0.152315	-0.103963	-0.090573	0.0297776	0.429587	0.125637	0.098922	0.180265	0.199033	0.00737089	-0.01523	0.259436	-0.0900909	-0.0229475	-0.00883812	-0.0258637	0.077449	-0.0437607	0.410809	-0.287841	-0.29819	0.30738	0.0282556	-0.162963	-0.135873	0.211942	-0.241932	-0.0549879	0.103028	0.0595928	-0.321474	-0.192443	-0.748273	-0.088068	0.152549	-0.437867	0.100002	-0.219302	-0.480475	4	NA	Homoscedastic & Parametric	1.8905e-16	0.242573	0.325085	0.991474	0.0866582	0.534632	0.326419
HORVU1Hr1G057630.5;HORVU2Hr1G060390.2	-0.225103	-0.312957	-0.134163	-0.0386139	0.287445	0.0641421	0.0248908	0.108143	0.152385	0.0340807	-0.0120768	0.342143	0.107174	-0.0831932	0.0171635	0.0267943	-0.0810418	-0.202918	0.325821	-0.095562	-0.228484	0.163032	-0.0105263	-0.0457253	-0.155711	0.0760177	-0.288096	-0.109177	-0.0203276	-0.0359836	-0.442383	-0.273963	-0.549966	-0.0493863	0.164458	-0.292165	0.0834363	-0.0578197	-0.29874	4	NA	Homoscedastic & Parametric	5.09977e-18	0.171863	0.776996	0.461205	0.164586	0.554626	0.273307
HORVU3Hr1G015590.2	-0.125589	-0.00142412	0.0011025	-0.028554	0.262863	0.116886	0.250096	0.25771	0.241309	0.0339727	0.0585948	0.245654	0.0622774	-0.0433155	0.241488	0.0642408	-0.0500248	-0.245586	0.414968	-0.0366283	-0.16653	-0.0184568	0.091713	-0.0224779	0.0149957	0.253539	-0.259873	0.0446753	0.103871	-0.091014	-0.504773	-0.383042	-0.31171	-0.0722558	0.0558342	-0.405325	0.158837	-0.137876	-0.310454	4	NA	Homoscedastic & Parametric	3.31465e-18	0.455753	0.405656	0.436136	0.10945	0.991646	0.829635
HORVU1Hr1G002150.11	-0.19836	-0.148739	-0.0614223	-0.137417	0.13666	-0.00474074	0.157155	0.203236	0.194768	0.03999	-0.0373181	0.184278	0.143145	-0.0962302	0.257252	0.063481	-0.0423391	-0.293812	0.299104	-0.0826009	-0.170346	0.0260881	0.0177241	-0.13301	-0.013197	0.181849	-0.197349	0.0495867	0.0874162	-0.079492	-0.416575	-0.137764	-0.23746	-0.0583807	0.122751	-0.33949	0.223895	-0.023174	-0.245132	4	NA	Homoscedastic & Parametric	1.24347e-18	0.491084	0.508306	0.711818	0.440883	0.750347	0.957846
HORVU1Hr1G006860.7	-0.177027	-0.129368	-0.0841715	0.124985	0.228962	0.0678691	0.0713997	0.185159	0.144649	0.0810526	-0.0155457	0.19247	0.0526375	-0.119751	0.0963119	0.091799	0.0520904	-0.179263	0.328933	0.00887567	-0.0932244	0.165779	0.0127676	-0.100715	0.00914793	0.205729	-0.272948	-0.00559002	0.146126	-0.0223511	-0.284321	-0.10443	-0.336174	-0.263971	-0.000264448	-0.257512	0.251913	-0.0983914	-0.256513	4	NA	Homoscedastic & Parametric	4.16829e-20	0.459211	0.517197	0.85508	0.292615	0.57601	0.601727
HORVU5Hr1G055350.3	-0.141023	-0.244233	-0.0425305	0.0999529	0.236234	0.0246294	-0.0107506	0.230777	0.195428	0.000226999	-0.0224991	0.19417	-0.00705907	-0.0327586	0.104577	0.0255842	0.0231875	-0.208562	0.251844	-0.0205253	-0.214222	0.0581196	-0.00256766	-0.232969	-0.0170727	0.162443	-0.288077	-0.00720494	0.0945344	-0.0176456	-0.280853	-0.148761	-0.359512	-0.147045	0.0903413	-0.242933	0.27457	-0.183271	-0.26314	4	NA	Homoscedastic & Parametric	8.11904e-20	0.209648	0.490161	0.487334	0.235302	0.639708	0.382144
HORVU4Hr1G019410.3	-0.172227	-0.162271	-0.116233	-0.0851358	0.194751	0.0249293	0.0163489	0.240608	0.177722	0.00192441	0.094475	0.286899	0.159043	0.0537884	0.223129	0.104229	-0.00184862	-0.325092	0.270139	-0.039645	-0.174426	0.310089	0.0988849	-0.0904933	0.126038	0.309261	-0.135143	0.0383579	0.231709	0.0466095	-0.390979	-0.250658	-0.414425	-0.0744006	0.156109	-0.296134	0.183575	-0.211476	-0.280565	4	NA	Homoscedastic & Parametric	6.07115e-18	0.715649	0.798745	0.84287	0.123083	0.513965	0.984173
HORVU1Hr1G075680.2	-0.18676	-0.293428	-0.0924313	-0.00821047	0.229591	0.013599	0.131786	0.231325	0.233783	0.136682	-0.0160244	0.225701	0.126381	-0.0235501	0.14543	0.0782305	0.0615322	-0.230517	0.313746	-0.05063	-0.0416658	0.235741	-0.00131566	-0.156564	0.0396241	0.263129	-0.163692	0.0815029	0.18623	0.0609609	-0.379429	-0.100918	-0.521463	-0.198598	0.128836	-0.293695	0.140852	-0.143923	-0.323596	4	NA	Homoscedastic & Parametric	9.70024e-19	0.508012	0.404033	0.676682	0.119574	0.594559	0.523338
HORVU4Hr1G000930.1	-0.058277	-0.265304	-0.0120702	0.0107908	0.194672	0.11018	0.179927	0.291807	0.260292	0.116824	-0.0508061	0.36192	0.277685	0.0448958	0.0789945	0.0768728	0.0957395	-0.227664	0.291113	-0.162239	-0.204543	0.172316	0.00321095	-0.0209547	0.0166427	0.169846	-0.137521	0.180205	0.112234	-0.0111043	-0.493683	-0.540576	-0.595909	-0.12632	0.129146	-0.193485	0.266468	-0.200516	-0.289709	4	NA	Homoscedastic & Parametric	1.09057e-18	0.124284	0.840908	0.267901	0.0682411	0.354718	0.375134
HORVU3Hr1G113850.2	-0.222479	-0.212883	-0.096885	-0.125771	0.185316	0.0848238	0.128709	0.0972921	0.2105	-0.0292699	-0.0892294	0.262175	0.158412	-0.0360987	0.0441156	0.0771445	0.0517919	-0.330857	0.256343	-0.191568	-0.249874	0.0370881	-0.0469983	-0.147539	-0.0963316	0.18403	-0.244698	0.0248067	0.0807892	-0.117111	-0.410609	-0.293007	-0.514372	-0.193652	0.0412571	-0.262112	0.149185	-0.150433	-0.284082	4	NA	Homoscedastic & Parametric	2.676e-19	0.156753	0.872508	0.673424	0.155201	0.253886	0.616813
HORVU6Hr1G051470.1	-0.229188	-0.24354	-0.164053	0.0220699	0.315557	0.0781998	0.125508	0.217102	0.211941	0.102667	0.0898878	0.267832	0.136319	-0.0225192	0.0780069	-0.00803509	0.00764549	-0.255681	0.323164	-0.119118	-0.246624	-0.0466907	0.0417637	-0.0671106	-0.00851076	0.151512	-0.122881	0.0524548	0.078105	-0.0361958	-0.385295	-0.319558	-0.504233	-0.130662	0.10258	-0.33244	0.214662	-0.0989026	-0.217805	4	NA	Homoscedastic & Parametric	2.46274e-18	0.381006	0.459968	0.832665	0.233892	0.965839	0.754016
HORVU3Hr1G024530.5	-0.144737	-0.191238	-0.10431	0.0583918	0.219702	0.0699745	0.183217	0.283014	0.170078	0.118154	0.0638501	0.211298	0.040526	-0.115094	0.137731	0.0168414	0.034848	-0.198755	0.350922	-0.107558	-0.140348	0.061757	-0.00824402	-0.175685	-0.0351977	0.121843	-0.208194	0.0986091	0.0749752	-0.0146335	-0.339262	-0.212001	-0.339589	-0.155995	0.092922	-0.332343	0.207811	-0.134301	-0.277529	4	NA	Homoscedastic & Parametric	2.13826e-19	0.303032	0.252294	0.727164	0.218135	0.820323	0.687252
HORVU4Hr1G062880.3	-0.204009	-0.245778	-0.0442332	-0.035077	0.303442	0.0102664	0.0737992	0.256436	0.248	0.0551725	-0.0233459	0.215837	0.0747104	-0.0836968	0.216553	0.0475563	-0.0291361	-0.412043	0.348115	-0.157674	-0.283117	0.0832977	-0.108538	-0.27104	-0.0882252	0.225563	-0.240654	0.0652763	0.0858724	-0.0479094	-0.480236	-0.334303	-0.520908	-0.216822	0.0976842	-0.368292	0.111778	-0.247399	-0.367029	4	NA	Homoscedastic & Parametric	2.01495e-17	0.215236	0.32492	0.896356	0.0963011	0.621612	0.709834
HORVU3Hr1G071820.1	-0.120661	-0.219958	-0.0385206	-0.0116557	0.17546	0.00135888	0.0858702	0.26741	0.289213	0.0903084	0.11302	0.141446	0.0817709	0.0413889	0.181195	0.0225388	-0.0417826	-0.30372	0.336547	-0.179831	-0.287496	-0.0724333	-0.050086	-0.211929	-0.0606104	0.110958	-0.257488	0.0203131	0.0816001	-0.118113	-0.323829	-0.272813	-0.542721	-0.208883	0.0491458	-0.30044	0.280751	-0.268614	-0.243057	4	NA	Homoscedastic & Parametric	1.78602e-18	0.162542	0.3319	0.959582	0.209386	0.929129	0.719116
HORVU5Hr1G069850.14	-0.0292353	-0.15522	0.0194849	-0.0785358	0.186722	-0.0105735	-0.000969104	0.226576	0.263076	0.13291	-0.0459792	0.310246	0.168325	0.0568547	0.208477	0.176126	0.0934258	-0.152869	0.362082	-0.0225226	-0.158487	0.124633	-0.0333747	-0.189894	0.110507	0.244335	0.0990259	0.181987	0.22696	0.047403	-0.509223	-0.3185	-0.511703	-0.149068	0.194738	-0.457373	0.105063	-0.330337	-0.552823	4	NA	Homoscedastic & Parametric	1.65043e-18	0.654535	0.589052	0.391811	0.00596269	0.723686	0.65252
HORVU2Hr1G046660.6	-0.104186	-0.174838	0.0192476	-0.159975	0.311026	0.119655	0.0854703	0.156753	0.143946	0.00816392	-0.00549014	0.362885	0.111836	-0.0341546	0.143245	0.171252	-0.0184879	-0.287428	0.373552	0.000901595	-0.0750215	0.100124	0.0489235	-0.119847	0.133727	0.257395	-0.220414	0.0783885	0.07171	-0.0102181	-0.259776	-0.105226	-0.326147	-0.117422	0.273738	-0.270964	0.107129	-0.186085	-0.565302	4	X642	Homoscedastic & Parametric	8.96468e-18	0.444888	0.732403	0.78071	0.0456342	0.543226	0.637534
HORVU5Hr1G066960.2	-0.065857	-0.138837	-0.0672268	-0.0372588	0.143816	-0.0148142	0.0671584	0.144984	0.171358	0.0624337	-0.0721906	0.187686	0.10941	-0.0822344	0.130574	0.0588775	0.0370234	-0.186554	0.287625	-0.1106	-0.0371805	0.0879445	-0.0693237	-0.0687062	-0.0205068	0.199714	-0.140873	0.11872	0.0788678	-0.0322789	-0.152192	-0.137095	-0.315513	-0.148422	0.171864	-0.366767	0.0505925	-0.201324	-0.452964	4	X642	Homoscedastic & Parametric	9.56661e-22	0.38238	0.414683	0.73881	0.013136	0.492511	0.515285
HORVU5Hr1G068630.33	-0.120862	-0.0716352	-0.104871	-0.0360603	0.232225	0.0549229	0.168068	0.133285	0.195424	0.054631	0.0634955	0.147443	0.0593917	-0.0474229	0.154074	0.135225	0.0664747	-0.176946	0.386958	0.00068175	-0.083447	0.207686	0.0716021	-0.104201	-0.00826798	0.184753	-0.200884	0.151708	0.0509898	0.00285707	-0.400617	-0.0548536	-0.418057	-0.12022	0.119411	-0.547505	-0.052799	-0.251154	-0.428486	4	X642	Homoscedastic & Parametric	3.34847e-20	0.566034	0.294028	0.455978	0.00853096	0.440733	0.817378
HORVU6Hr1G063860.1	-0.188416	-0.141199	-0.0943142	-0.022931	0.1803	0.0838192	0.0773618	0.141047	0.191216	0.0851612	0.0105455	0.238645	0.167678	0.0185654	0.128281	0.0855221	-0.015657	-0.0862278	0.38709	0.0196089	-0.0720449	0.0836162	0.0465037	-0.0975873	0.0491473	0.108142	-0.150772	0.0570929	0.0760674	-0.0373864	-0.284862	-0.249273	-0.343845	-0.198515	0.142992	-0.443342	-0.0208506	-0.24534	-0.487132	4	X642	Homoscedastic & Parametric	8.79533e-21	0.369693	0.811888	0.728711	0.00264865	0.652389	0.413371
HORVU2Hr1G096760.1	-0.189486	-0.158595	-0.0879467	-0.00292874	0.2371	0.0583948	0.111331	0.137824	0.0514939	0.00599026	-0.114041	0.113379	0.170089	-0.0723242	0.15185	0.0394942	-0.0130489	-0.154762	0.206091	-0.00645612	-0.0913758	0.122805	-0.0152543	-0.0809648	0.044708	0.176984	-0.248112	0.0347614	0.21838	0.0293578	-0.417171	-0.229403	-0.416891	-0.205374	0.124947	-0.408632	0.0583824	-0.294511	-0.486941	4	X642	Homoscedastic & Parametric	6.07669e-20	0.73015	0.773004	0.89747	0.0141683	0.704251	0.890569
HORVU6Hr1G011140.1	-0.0743676	-0.267096	-0.0904862	-0.025614	0.148255	-0.00407822	0.0908732	0.23513	0.156261	0.00118911	0.0362405	0.190781	0.180697	-0.0282062	0.0913261	0.0893129	0.0796492	-0.349874	0.341733	-0.0319213	-0.142149	0.121664	0.0692598	-0.305671	-0.103026	0.229198	-0.320924	-0.0679252	0.166442	0.0161805	-0.587309	-0.259537	-0.54326	-0.177034	0.0336062	-0.527441	-0.101508	-0.391489	-0.569363	4	X642	Homoscedastic & Parametric	1.24393e-18	0.174344	0.656423	0.619991	0.00243505	0.347061	0.303412
HORVU7Hr1G024350.1	-0.0949438	-0.0482848	-0.184591	-0.16836	0.490493	0.16612	0.0302527	0.284323	0.503786	0.257087	0.0141336	0.255071	0.0276809	-0.0851402	0.351784	0.086773	0.147694	-0.0600085	0.623437	-0.0593776	-0.346675	0.180487	0.0682024	-0.186786	-0.148521	0.285216	-0.190147	0.182637	0.262196	-0.0275054	-0.404837	-0.348912	-0.723113	-0.207498	0.0509741	-0.537916	0.0130069	-0.343458	-0.426107	4	X214	Homoscedastic & Parametric	2.33822e-14	0.83643	0.0235319	0.375051	0.120086	0.586849	0.96964
HORVU6Hr1G024100.1	-0.172554	-0.0404291	-0.139934	-0.0850199	0.174992	0.0300523	0.0789622	0.17035	0.241571	0.0519578	0.0284342	0.15567	0.127953	-0.0796884	0.175173	0.0168564	-0.0223648	0.0864346	0.454762	-0.0997205	-0.198855	0.169407	0.147776	-0.141511	-0.0936043	0.133397	-0.0849212	0.0943076	0.111432	-0.00867841	-0.313606	-0.271819	-0.460155	-0.115739	0.125729	-0.457861	0.013983	-0.235169	-0.338364	4	X214	Homoscedastic & Parametric	3.53413e-19	0.572926	0.324184	0.587629	0.0475444	0.801215	0.422506
HORVU5Hr1G118340.1	-0.114549	-0.185005	-0.129679	-0.0823701	0.196448	0.0261284	0.0294129	0.063058	0.128756	-0.0160564	0.0412853	0.207021	0.13704	-0.0537332	0.0911768	0.0862793	0.033044	-0.202962	0.374471	-0.0537534	-0.116851	0.215286	0.1059	-0.0290817	-0.101147	0.0994115	-0.0434934	0.132984	0.172979	0.0263917	-0.248993	-0.314515	-0.295725	-0.122533	0.1433	-0.388522	-0.0204281	-0.240931	-0.270851	4	NA	Homoscedastic & Parametric	1.57833e-20	0.754632	0.713158	0.847227	0.0279794	0.49201	0.558791
HORVU2Hr1G123650.2	-0.0489362	-0.142444	0.0363526	0.0951625	0.190908	0.0876652	0.201064	0.191465	0.26482	0.166282	0.0469691	0.0939539	0.217884	0.0662722	0.287762	0.0263352	0.0823921	-0.0329327	0.407887	-0.0736329	-0.0510322	0.189207	0.0315547	-0.01604	0.00301068	0.234276	-0.11938	0.0702081	0.0358886	0.0446006	-0.2885	-0.21594	-0.262005	-0.0844593	0.0714982	-0.320089	0.211749	-0.30043	-0.331197	4	NA	Homoscedastic & Parametric	6.50599e-21	0.156924	0.547961	0.99766	0.0147887	0.459007	0.363792
HORVU2Hr1G093030.1	-0.027326	-0.139341	0.0258023	0.0587424	0.224902	0.180939	0.136547	0.259391	0.271577	0.132321	-0.111578	0.263121	0.112184	0.0152216	0.145871	0.0763425	0.017169	-0.0583008	0.443462	-0.222953	-0.0846494	0.0993009	0.0611736	-0.0612139	-0.135633	0.0619959	-0.272936	-0.00637804	-0.00336998	-0.105638	-0.390902	-0.417744	-0.507027	-0.220064	-0.0192213	-0.300918	0.232121	-0.309865	-0.597265	4	NA	Homoscedastic & Parametric	3.95986e-19	0.0448948	0.440858	0.64462	0.0161171	0.549965	0.120931
HORVU6Hr1G047360.5;HORVU2Hr1G119280.1	-0.10105	-0.131518	-0.0809789	0.0814283	0.185034	0.0518629	0.0354438	0.174303	0.127197	0.0930518	-0.0862842	0.147712	0.0742457	0.0271531	0.0577583	0.0274704	0.00186687	-0.213098	0.307142	-0.159008	-0.110185	0.217936	-0.000683363	0.00173323	-0.0201918	0.120024	-0.0821256	0.00881071	0.0342213	-0.106909	-0.230759	-0.264737	-0.422469	-0.133788	0.113241	-0.379458	0.0639844	-0.327896	-0.381593	4	NA	Homoscedastic & Parametric	1.27093e-21	0.284799	0.573425	0.463709	0.00567287	0.563433	0.450921
HORVU3Hr1G045480.6	-0.112673	-0.20597	-0.0721417	0.00858421	0.245813	0.030121	0.151664	0.197008	0.183558	0.054927	-0.0637774	0.301779	0.162497	-0.0125869	0.0113499	-0.0180416	0.0304031	-0.14302	0.361535	-0.300747	-0.247819	0.231301	-0.0542002	-0.123129	-0.149849	0.217751	-0.0742583	0.0791273	0.0640355	-0.10275	-0.263011	-0.354558	-0.678033	-0.295826	0.0265344	-0.314573	0.181422	-0.262957	-0.421071	4	NA	Homoscedastic & Parametric	9.81199e-19	0.0951431	0.740034	0.396103	0.0374823	0.253245	0.258485
HORVU0Hr1G014070.1;HORVU5Hr1G112530.1	-0.121309	-0.265371	-0.0485283	-0.0106324	0.109238	0.0867992	0.0387625	0.139809	0.297419	0.0312533	-0.0511727	0.156833	0.0793131	-0.0117206	0.0434172	0.0578467	-0.0996857	-0.198211	0.428252	-0.107737	-0.125483	-0.0488426	0.0117959	-0.0561758	0.0349306	0.178243	-0.0183907	0.00780475	0.0910709	-0.0103199	-0.130893	-0.0801826	-0.275904	-0.0513439	0.0818957	-0.318284	0.136222	-0.339251	-0.340241	4	NA	Homoscedastic & Parametric	7.68258e-20	0.65556	0.5156	0.556466	0.0440483	0.813022	0.4508
HORVU7Hr1G095960.1	-0.114197	0.0799693	-0.0592005	-0.0575557	0.129379	0.0713352	0.0410864	0.141969	0.135958	0.0270297	-0.116261	0.249686	0.180512	0.0764849	0.0777831	0.287328	0.143247	0.076309	0.369271	0.0877305	-0.0614608	0.138888	0.0334793	-0.051619	0.122146	0.0998685	-0.159184	-0.0946057	0.046625	-0.0513799	-0.33075	-0.307042	-0.449422	-0.238362	0.0350358	-0.415998	0.00121592	-0.319283	-0.55586	4	NA	Homoscedastic & Parametric	4.02087e-21	0.440235	0.857756	0.576283	0.000925607	0.335077	0.353355
HORVU6Hr1G091630.1	-0.260689	0.0585137	-0.151168	-0.0310496	0.135511	0.0595184	-0.0546964	0.129503	0.170317	0.0523279	-0.113306	0.252683	0.203167	-0.0535783	0.156238	0.144899	0.119219	0.0757912	0.336418	-0.0954794	0.0129854	0.0502256	-0.0580377	-0.110916	0.0895046	-0.0399377	-0.164687	0.0410789	0.142833	0.00180297	-0.278977	-0.541133	-0.382667	-0.232241	-0.0626867	-0.475342	-0.0229964	-0.188647	-0.260819	4	NA	Homoscedastic & Parametric	6.45485e-21	0.419868	0.990381	0.757609	0.0116284	0.511118	0.314585
HORVU2Hr1G018720.7	-0.0751302	0.0135984	0.00375328	0.0516448	0.231587	0.0367168	0.200006	0.134715	0.0975352	-0.0752023	-0.0675675	0.145509	0.0214052	-0.0637117	0.116573	0.0824244	0.0865759	-0.184781	0.391053	0.0591284	-0.0550545	0.178929	-0.00740537	-0.157977	-0.0503267	0.246569	-0.0735262	0.0788732	0.140159	0.041875	-0.117392	-0.189916	-0.278372	-0.105679	0.138698	-0.38871	0.0943274	-0.342459	-0.404941	4	NA	Homoscedastic & Parametric	1.40852e-20	0.625802	0.70771	0.748812	0.0143732	0.374812	0.802525
HORVU2Hr1G026340.3	-0.121269	-0.123352	-0.0860684	0.059242	0.117528	0.0787688	0.0876425	0.315261	0.0572545	-0.108753	-0.239942	0.223666	0.0868342	-0.180546	0.233865	0.186937	0.0683384	-0.17995	0.255042	-0.0401423	-0.0738691	0.0978952	-0.118567	-0.220248	0.0990445	0.209274	-0.226756	0.00750897	0.0250704	0.0189116	-0.240067	-0.318988	-0.56326	-0.350943	0.0299041	-0.479646	0.161142	-0.558266	-0.442809	4	NA	Homoscedastic & Parametric	4.61759e-18	0.423908	0.764173	0.927306	0.0200303	0.35826	0.694308
[truncated: 1,701 more rows]
[truncated: 14 more columns]
