# Supplementary material for: Membrane-Enriched Proteomics Link Ribosome Accumulation and Proteome Reprogramming With Cold Acclimation in Barley Root Meristems
Source: Front Plant Sci. 2021 Apr 30;12:656683. doi: 10.3389/fpls.2021.656683 (PMC8121087; doi:10.3389/fpls.2021.656683)
Supplement: Supplementary file 5 [file Table_5.XLSX]

## Sheet: Supplementary Table 5
Supplementary Table 5. GO terms associated with statistically generated clusters. Related to Figure 5. Clusters were produced by K-means (X1, X2, X3) or by bootstrapping a hierarchical cluster analysis and grabbing only those groups that appear more than 99% of the times (X109, X1347, X151, X1632, X614, X733, X904). Only groups of at least five proteins were inputted into a gene ontology enrichme…	description	frequency	plot_X	plot_Y	plot_size	log10 p-value	uniqueness	dispensability	representative	eliminated	Cluster ID	GO-Type
GO:0006833	water transport	0.00014	1.662	-5.698	3.256	-4.0809	0.904	0	water transport	0	X1	Biological process
GO:0006950	response to stress	0.04575	-5.986	1.737	5.769	-5.0516	0.636	0	defense response to fungus	0	X1	Biological process
GO:0008152	metabolic process	0.75387	3.132	-2.83	6.986	-1.7696	0.982	0	ROS Response	0	X1	Biological process
GO:0042737	drug catabolic process	1e-05	1.961	6.3	2.286	-6.0996	0.74	0	ROS Response	0	X1	Biological process
GO:0017001	antibiotic catabolic process	0.00019	null	null	3.384	-3.9957	0.717	0.927	ROS Response	1	X1	Biological process
GO:0016999	antibiotic metabolic process	0.00055	null	null	3.846	-4.0434	0.786	0.801	ROS Response	1	X1	Biological process
GO:0050896	response to stimulus	0.1221	-3.525	-6.367	6.195	-2.2581	0.938	0	defense response to fungus	0	X1	Biological process
GO:0009056	catabolic process	0.0482	5.67	-2.468	5.791	-3.6946	0.921	0.01	ROS Response	0	X1	Biological process
GO:0017144	drug metabolic process	0.00058	-6.298	-4.689	3.868	-4.129	0.895	0.032	ROS Response	0	X1	Biological process
GO:0072593	reactive oxygen species metabolic process	0.00282	6.042	0.695	4.558	-4.0645	0.891	0.045	ROS Response	0	X1	Biological process
GO:0051186	cofactor metabolic process	0.03985	2.293	0.475	5.709	-3.4056	0.883	0.065	ROS Response	0	X1	Biological process
GO:0055114	oxidation-reduction process	0.1506	5.626	3.424	6.286	-1.699	0.916	0.076	oxidation-reduction	0	X1	Biological process
GO:0042044	fluid transport	0.00016	0.836	-5.935	3.314	-4.1267	0.904	0.307	water transport	0	X1	Biological process
GO:0050832	defense response to fungus	0.00028	-7.025	1.939	3.557	-1.6421	0.683	0.328	defense response to fungus	0	X1	Biological process
GO:0009620	response to fungus	0.00035	null	null	3.655	-1.5186	0.7	0.718	defense response to fungus	1	X1	Biological process
GO:0051187	cofactor catabolic process	0.00062	1.215	7.064	3.904	-4.1221	0.79	0.358	ROS Response	0	X1	Biological process
GO:0006979	response to oxidative stress	0.00575	-5.511	2.066	4.868	-3.0605	0.661	0.448	oxidative stress	0	X1	Biological process
GO:0042744	hydrogen peroxide catabolic process	0.00093	0.62	7.042	4.078	-4.0414	0.737	0.461	ROS Response	0	X1	Biological process
GO:0042743	hydrogen peroxide metabolic process	0.001	null	null	4.108	-4.1385	0.84	0.843	ROS Response	1	X1	Biological process
GO:0098869	cellular oxidant detoxification	0.00784	-5.696	3.275	5.003	-3.3487	0.538	0.465	oxidant detoxification	0	X1	Biological process
GO:1990748	cellular detoxification	0.00787	null	null	5.004	-3.2557	0.538	0.987	oxidant detoxification	1	X1	Biological process
GO:0009636	response to toxic substance	0.00833	null	null	5.029	-3.0097	0.592	0.701	oxidant detoxification	1	X1	Biological process
GO:0070887	cellular response to chemical stimulus	0.01007	null	null	5.111	-2.0287	0.57	0.719	oxidant detoxification	1	X1	Biological process
GO:0098754	detoxification	0.00804	null	null	5.014	-3.2	0.553	0.982	oxidant detoxification	1	X1	Biological process
GO:0044248	cellular catabolic process	0.03266	1.177	6.588	5.622	-2.1457	0.769	0.555	ROS Response	0	X1	Biological process
GO:0042221	response to chemical	0.03071	-6.003	1.265	5.595	-1.4737	0.645	0.562	oxidant detoxification	0	X1	Biological process
GO:0006952	defense response	0.00568	-6.255	2.372	4.863	-2.9508	0.661	0.57	defense response to fungus	0	X1	Biological process
GO:0097237	cellular response to toxic substance	1e-05	-5.482	4.337	2.176	-3.2277	0.668	0.586	oxidant detoxification	0	X1	Biological process
GO:0003824	catalytic activity	0.65827	-5.753	2.057	6.967	-3.3768	0.948	0	acylglycerol lipase	0	X1	Molecular function
GO:0004601	peroxidase activity	0.00377	-2.303	-5.576	4.725	-3.4473	0.785	0	peroxidase activity	0	X1	Molecular function
GO:0015250	water channel activity	0.0001	0.471	6.362	3.136	-3.7399	0.807	0	water channel	0	X1	Molecular function
GO:0016209	antioxidant activity	0.0071	-1.08	0.185	5	-3.3788	0.853	0	peroxidase activity	0	X1	Molecular function
GO:0020037	heme binding	0.01357	1.668	-6.902	5.281	-1.3556	0.854	0	heme binding	0	X1	Molecular function
GO:0004568	chitinase activity	0.00021	6.349	-1.123	3.478	-3.4389	0.713	0.02	chitinase activity	0	X1	Molecular function
GO:0008171	O-methyltransferase activity	0.00247	-6.071	-1.671	4.542	-1.4498	0.827	0.025	O-methyltransferase activity	0	X1	Molecular function
GO:0016491	oxidoreductase activity	0.12783	5.001	-5.9	6.255	-2.098	0.834	0.037	peroxidase activity	0	X1	Molecular function
GO:0047372	acylglycerol lipase activity	7e-05	5.888	3.476	2.963	-2.6716	0.776	0.129	acylglycerol lipase	0	X1	Molecular function
GO:0016798	hydrolase activity, acting on glycosyl bonds	0.01822	6.371	1.237	5.409	-2.6799	0.748	0.187	chitinase activity	0	X1	Molecular function
GO:0005372	water transmembrane transporter activity	0.0001	1.483	6.554	3.168	-3.4377	0.807	0.321	water channel	0	X1	Molecular function
GO:0016684	oxidoreductase activity, acting on peroxide as acceptor	0.00452	-3.169	-5.143	4.803	-3.5331	0.785	0.327	peroxidase activity	0	X1	Molecular function
GO:0004553	hydrolase activity, hydrolyzing O-glycosyl compounds	0.0149	6.249	-0.214	5.322	-3.0334	0.691	0.621	chitinase activity	0	X1	Molecular function
GO:0005576	extracellular region	0.02375	-5.875	-1.761	5.369	-9.1931	0.771	0	extracellular region	0	X1	Cellular component
GO:0031225	anchored component of membrane	0.00078	3.371	-5.383	3.885	-3.1068	0.749	0	anchored component of membrane	0	X1	Cellular component
GO:0043226	organelle	0.20788	-1.978	-5.247	6.311	-2.1851	0.812	0	intracellular membrane-bounded organelle	0	X1	Cellular component
GO:0046658	anchored component of plasma membrane	0.0003	-4.112	4.77	3.465	-2.9914	0.6	0.033	anchored component of membrane	0	X1	Cellular component
GO:0043229	intracellular organelle	0.19917	4.45	3.781	6.292	-2.0964	0.469	0.063	intracellular membrane-bounded organelle	0	X1	Cellular component
GO:0043227	membrane-bounded organelle	0.14447	null	null	6.153	-1.9136	0.527	0.701	intracellular membrane-bounded organelle	1	X1	Cellular component
GO:0071944	cell periphery	0.11583	5.915	0.221	6.057	-1.4921	0.691	0.163	anchored component of membrane	0	X1	Cellular component
GO:0031226	intrinsic component of plasma membrane	0.01299	-3.463	5.398	5.106	-2.1192	0.579	0.584	anchored component of membrane	0	X1	Cellular component
GO:0043231	intracellular membrane-bounded organelle	0.1376	4.474	4.531	6.132	-1.7747	0.473	0.692	intracellular membrane-bounded organelle	0	X1	Cellular component
GO:0005488	binding	0.55656	-1.371	-6.782	6.894	-1.5331	0.951	0	unfolded protein binding	0	X109	Molecular function
GO:0051082	unfolded protein binding	0.00486	-4.57	-1.649	4.835	-6.9393	0.768	0	ATP binding	0	X109	Molecular function
GO:0008144	drug binding	0.00178	-3.809	4	4.4	-3.1549	0.782	0.045	unfolded protein binding	0	X109	Molecular function
GO:0005515	protein binding	0.0441	1.779	6.81	5.793	-2.9914	0.719	0.062	unfolded protein binding	0	X109	Molecular function
GO:0032553	ribonucleotide binding	0.16747	6.893	-3.246	6.372	-3.2782	0.332	0.106	ATP binding	0	X109	Molecular function
GO:0017076	purine nucleotide binding	0.16107	null	null	6.356	-3.2534	0.355	0.707	ATP binding	0	X109	Molecular function
GO:0000166	nucleotide binding	0.20185	null	null	6.454	-3.098	0.333	0.754	ATP binding	0	X109	Molecular function
GO:0032559	adenyl ribonucleotide binding	0.14309	null	null	6.304	-3.0526	0.329	0.852	ATP binding	0	X109	Molecular function
GO:0030554	adenyl nucleotide binding	0.14356	null	null	6.306	-3.1707	0.339	0.813	ATP binding	0	X109	Molecular function
GO:0035639	purine ribonucleoside triphosphate binding	0.15815	null	null	6.348	-3.1656	0.339	0.703	ATP binding	0	X109	Molecular function
GO:0005524	ATP binding	0.14125	null	null	6.299	-2.9066	0.314	0.777	ATP binding	0	X109	Molecular function
GO:0032555	purine ribonucleotide binding	0.16057	null	null	6.354	-3.2041	0.323	0.809	ATP binding	0	X109	Molecular function
GO:0097367	carbohydrate derivative binding	0.17252	3.455	-3.489	6.385	-3.2933	0.669	0.147	ATP binding	1	X109	Molecular function
GO:0043168	anion binding	0.20942	2.251	0.599	6.47	-3.0168	0.612	0.157	ATP binding	0	X109	Molecular function
GO:0036094	small molecule binding	0.21337	6.484	3.38	6.478	-2.9872	0.659	0.167	ATP binding	1	X109	Molecular function
GO:0097159	organic cyclic compound binding	0.41137	4.81	1.391	6.763	-2.6198	0.624	0.214	ATP binding	1	X109	Molecular function
GO:0043167	ion binding	0.33492	6.816	1.004	6.673	-1.7167	0.636	0.262	ATP binding	1	X109	Molecular function
GO:1901363	heterocyclic compound binding	0.41115	4.904	-0.16	6.763	-2.5986	0.624	0.292	ATP binding	1	X109	Molecular function
GO:1901265	nucleoside phosphate binding	0.20185	7.525	-1.778	6.454	-3.1361	0.556	0.309	ATP binding	0	X109	Molecular function
GO:0006457	protein folding	0.00903	0.991	0.427	5.064	-6.104	1	0	protein folding	0	X109	Biological process
GO:0005832	chaperonin-containing T-complex	0.00021	-3.258	5.114	3.306	-13.0545	0.391	0	chaperonin-containing T-complex	0	X109	Cellular component
GO:0032991	macromolecular complex	0.14008	5.32	0.076	6.139	-3.2403	0.616	0	chaperonin-containing T-complex	0	X109	Cellular component
GO:0005622	intracellular	0.41175	-3.121	-5.147	6.608	-5.3979	0.538	0.066	chaperonin-containing T-complex	0	X109	Cellular component
GO:0005737	cytoplasm	0.26017	-4.566	-1.929	6.408	-3.0372	0.418	0.276	chaperonin-containing T-complex	0	X109	Cellular component
GO:0005829	cytosol	0.02553	-4.522	1.983	5.4	-1.5686	0.339	0.297	chaperonin-containing T-complex	0	X109	Cellular component
GO:0033180	proton-transporting V-type ATPase, V1 domain	0.00054	0.576	0.999	3.729	-3.4023	0.004	0	proton-transporting V-type ATPase complex	0	X1347	Cellular component
GO:0016471	vacuolar proton-transporting V-type ATPase complex	0.00044	null	null	3.633	-3.3143	0.005	0.855	proton-transporting V-type ATPase complex	1	X1347	Cellular component
GO:0033178	proton-transporting two-sector ATPase complex, catalytic domain	0.00346	null	null	4.531	-2.4522	0.004	0.817	proton-transporting V-type ATPase complex	1	X1347	Cellular component
GO:0033176	proton-transporting V-type ATPase complex	0.00146	null	null	4.157	-2.9469	0.01	0.71	proton-transporting V-type ATPase complex	1	X1347	Cellular component
GO:0000221	vacuolar proton-transporting V-type ATPase, V1 domain	0.00015	null	null	3.173	-3.4895	0.012	0.799	proton-transporting V-type ATPase complex	1	X1347	Cellular component
GO:0016469	proton-transporting two-sector ATPase complex	0.00663	0.993	0.576	4.814	-1.9136	0.043	0.576	proton-transporting V-type ATPase complex	0	X1347	Cellular component
GO:0002181	cytoplasmic translation	0.00064	5.018	-0.021	3.915	-1.7352	0.633	0	ribosomal large subunit biogenesis	0	X151	Biological process
GO:0042254	ribosome biogenesis	0.01422	-4.952	-0.801	5.261	-1.8861	0.06	0	ribosomal large subunit biogenesis	0	X151	Biological process
GO:0022613	ribonucleoprotein complex biogenesis	0.01614	null	null	5.316	-1.8861	0.101	0.715	ribosomal large subunit biogenesis	1	X151	Biological process
GO:0000027	ribosomal large subunit assembly	0.00079	null	null	4.005	-1.7773	0.177	0.712	ribosomal large subunit biogenesis	1	X151	Biological process
GO:0042273	ribosomal large subunit biogenesis	0.00151	null	null	4.287	-1.4023	0.102	0.755	ribosomal large subunit biogenesis	1	X151	Biological process
GO:0044085	cellular component biogenesis	0.04355	-4.945	0.843	5.747	-1.4179	0.146	0.608	ribosomal large subunit biogenesis	0	X151	Biological process
GO:0090148	membrane fission	5e-05	2.832	-3.526	2.782	-1.8697	0.726	0	membrane fission	0	X1632	Biological process
GO:0006073	cellular glucan metabolic process	0.00316	-5.446	-0.518	4.607	-1.8539	0.259	0.021	beta-glucan biosynthetic process	0	X1632	Biological process
GO:0034637	cellular carbohydrate biosynthetic process	0.00478	null	null	4.787	-1.6253	0.253	0.778	beta-glucan biosynthetic process	1	X1632	Biological process
GO:0033692	cellular polysaccharide biosynthetic process	0.00394	null	null	4.703	-1.7077	0.214	0.915	beta-glucan biosynthetic process	1	X1632	Biological process
GO:0044042	glucan metabolic process	0.00317	null	null	4.609	-1.9066	0.314	0.81	beta-glucan biosynthetic process	1	X1632	Biological process
GO:0009250	glucan biosynthetic process	0.00165	null	null	4.326	-1.7905	0.236	0.943	beta-glucan biosynthetic process	1	X1632	Biological process
GO:0044264	cellular polysaccharide metabolic process	0.00553	null	null	4.851	-1.6383	0.264	0.893	beta-glucan biosynthetic process	1	X1632	Biological process
GO:0051274	beta-glucan biosynthetic process	0.00045	null	null	3.765	-1.8601	0.277	0.853	beta-glucan biosynthetic process	1	X1632	Biological process
GO:0000271	polysaccharide biosynthetic process	0.00532	null	null	4.834	-1.6655	0.248	0.848	beta-glucan biosynthetic process	1	X1632	Biological process
GO:0071554	cell wall organization or biogenesis	0.0095	6.934	0.219	5.086	-1.4023	0.849	0.031	plant-type cell wall biogenesis	0	X1632	Biological process
GO:0051301	cell division	0.0123	3.376	4.089	5.198	-1.8268	0.722	0.13	mitotic cytokinesis	0	X1632	Biological process
GO:0000910	cytokinesis	0.00315	1.018	5.817	4.606	-1.9469	0.636	0.184	mitotic cytokinesis	0	X1632	Biological process
GO:0042546	cell wall biogenesis	0.0064	1.978	-5.673	4.915	-1.5654	0.758	0.299	plant-type cell wall biogenesis	0	X1632	Biological process
GO:0016051	carbohydrate biosynthetic process	0.01079	-6.144	-0.07	5.141	-1.5482	0.328	0.542	beta-glucan biosynthetic process	0	X1632	Biological process
GO:0005976	polysaccharide metabolic process	0.00906	-5.963	-1.048	5.065	-1.5467	0.411	0.604	beta-glucan biosynthetic process	0	X1632	Biological process
GO:0044262	cellular carbohydrate metabolic process	0.01257	-5.824	0.512	5.208	-1.4034	0.383	0.627	beta-glucan biosynthetic process	0	X1632	Biological process
GO:0009832	plant-type cell wall biogenesis	0.00016	1.325	-6.045	3.311	-1.6737	0.773	0.669	plant-type cell wall biogenesis	0	X1632	Biological process
GO:0061640	cytoskeleton-dependent cytokinesis	0.0008	0.391	6.264	4.014	-1.8386	0.638	0.699	mitotic cytokinesis	0	X1632	Biological process
GO:0000281	mitotic cytokinesis	0.0007	null	null	3.953	-1.6615	0.64	0.798	mitotic cytokinesis	1	X1632	Biological process
GO:0006575	cellular modified amino acid metabolic process	0.00785	4.695	2.002	5.003	-1.5952	0.13	0	protein glutathionylation	0	X2	Biological process
GO:0010731	protein glutathionylation	2e-05	-5.104	0.005	2.446	-1.4789	0.215	0.038	protein glutathionylation	0	X2	Biological process
GO:0006749	glutathione metabolic process	0.00151	4.691	-2.011	4.288	-1.7423	0.129	0.249	protein glutathionylation	0	X2	Biological process
GO:0000398	mRNA splicing, via spliceosome	0.00315	6.389	4.32	4.607	-2.0246	0.558	0.335	alternative mRNA splicing, via spliceosome	0	X3	Biological process
GO:0043484	regulation of RNA splicing	0.0004	null	null	3.705	-1.8697	0.621	0.804	alternative mRNA splicing, via spliceosome	1	X3	Biological process
GO:0048024	regulation of mRNA splicing, via spliceosome	0.00025	null	null	3.512	-1.9101	0.599	0.817	alternative mRNA splicing, via spliceosome	1	X3	Biological process
GO:0006397	mRNA processing	0.00561	null	null	4.857	-1.6421	0.571	0.876	alternative mRNA splicing, via spliceosome	1	X3	Biological process
GO:0000381	regulation of alternative mRNA splicing, via spliceosome	0.00017	null	null	3.344	-2.0241	0.608	0.939	alternative mRNA splicing, via spliceosome	1	X3	Biological process
GO:0000377	RNA splicing, via transesterification reactions with bulged adenosine as nucleophile	0.00318	null	null	4.61	-2.0083	0.579	0.995	alternative mRNA splicing, via spliceosome	1	X3	Biological process
GO:0000380	alternative mRNA splicing, via spliceosome	0.00021	null	null	3.425	-2.0092	0.631	0.805	alternative mRNA splicing, via spliceosome	1	X3	Biological process
GO:0000375	RNA splicing, via transesterification reactions	0.0032	null	null	4.613	-2.0164	0.582	0.95	alternative mRNA splicing, via spliceosome	1	X3	Biological process
GO:1903311	regulation of mRNA metabolic process	0.00044	null	null	3.755	-1.4067	0.681	0.711	alternative mRNA splicing, via spliceosome	1	X3	Biological process
GO:0050684	regulation of mRNA processing	0.00035	null	null	3.651	-1.4295	0.615	0.95	alternative mRNA splicing, via spliceosome	1	X3	Biological process
GO:0010468	regulation of gene expression	0.10815	5.325	4.748	6.142	-1.4202	0.65	0.529	alternative mRNA splicing, via spliceosome	0	X3	Biological process
GO:0016070	RNA metabolic process	0.15951	5.603	0.252	6.311	-2.0809	0.604	0.541	alternative mRNA splicing, via spliceosome	0	X3	Biological process
GO:0008380	RNA splicing	0.00413	6.492	4.088	4.725	-1.9245	0.615	0.592	alternative mRNA splicing, via spliceosome	0	X3	Biological process
GO:0061077	chaperone-mediated protein folding	0.00043	-4.183	-3.513	3.743	-1.4401	0.936	0.026	chaperone-mediated protein folding	0	X3	Biological process
GO:0006457	protein folding	0.00903	-2.773	-3.427	5.064	-4.6882	0.922	0.034	chaperone-mediated protein folding	0	X3	Biological process
GO:0002181	cytoplasmic translation	0.00064	7.788	3.549	3.915	-1.3072	0.693	0.443	cytoplasmic translation	0	X3	Biological process
GO:0008152	metabolic process	0.75387	-4.697	-1.679	6.986	-4.4449	0.993	0	maturation of LSU-rRNA from tricistronic rRNA transcript (SSU-rRNA, 5.8S rRNA, LSU-rRNA)	0	X3	Biological process
GO:0009987	cellular process	0.6378	-3.127	-1.302	6.913	-7.8665	0.99	0	maturation of LSU-rRNA from tricistronic rRNA transcript (SSU-rRNA, 5.8S rRNA, LSU-rRNA)	0	X3	Biological process
GO:0042254	ribosome biogenesis	0.01422	-1.989	6.278	5.261	-7.9706	0.711	0	maturation of LSU-rRNA from tricistronic rRNA transcript (SSU-rRNA, 5.8S rRNA, LSU-rRNA)	0	X3	Biological process
GO:0042273	ribosomal large subunit biogenesis	0.00151	null	null	4.287	-4.5591	0.752	0.755	maturation of LSU-rRNA from tricistronic rRNA transcript (SSU-rRNA, 5.8S rRNA, LSU-rRNA)	1	X3	Biological process
GO:0022613	ribonucleoprotein complex biogenesis	0.01614	null	null	5.316	-7.4698	0.741	0.715	maturation of LSU-rRNA from tricistronic rRNA transcript (SSU-rRNA, 5.8S rRNA, LSU-rRNA)	1	X3	Biological process
GO:0006364	rRNA processing	0.00952	null	null	5.087	-3.5735	0.407	0.912	maturation of LSU-rRNA from tricistronic rRNA transcript (SSU-rRNA, 5.8S rRNA, LSU-rRNA)	1	X3	Biological process
GO:0071840	cellular component organization or biogenesis	0.08568	-5.252	0.407	6.041	-4.0278	0.975	0	maturation of LSU-rRNA from tricistronic rRNA transcript (SSU-rRNA, 5.8S rRNA, LSU-rRNA)	0	X3	Biological process
GO:0006807	nitrogen compound metabolic process	0.38744	-3.726	1.839	6.696	-5.4622	0.924	0.024	maturation of LSU-rRNA from tricistronic rRNA transcript (SSU-rRNA, 5.8S rRNA, LSU-rRNA)	0	X3	Biological process
GO:0044237	cellular metabolic process	0.53061	1.887	-6.53	6.833	-4.7825	0.853	0.088	maturation of LSU-rRNA from tricistronic rRNA transcript (SSU-rRNA, 5.8S rRNA, LSU-rRNA)	0	X3	Biological process
GO:0071704	organic substance metabolic process	0.58357	-2.191	-5.947	6.874	-4.433	0.919	0.119	maturation of LSU-rRNA from tricistronic rRNA transcript (SSU-rRNA, 5.8S rRNA, LSU-rRNA)	0	X3	Biological process
GO:0044238	primary metabolic process	0.53743	-2.237	-5.199	6.839	-4.2984	0.92	0.12	maturation of LSU-rRNA from tricistronic rRNA transcript (SSU-rRNA, 5.8S rRNA, LSU-rRNA)	0	X3	Biological process
GO:0010467	gene expression	0.19671	3.65	4.047	6.402	-8.2832	0.764	0.173	maturation of LSU-rRNA from tricistronic rRNA transcript (SSU-rRNA, 5.8S rRNA, LSU-rRNA)	0	X3	Biological process
GO:0043170	macromolecule metabolic process	0.39491	1.071	-2.143	6.705	-4.2907	0.844	0.176	maturation of LSU-rRNA from tricistronic rRNA transcript (SSU-rRNA, 5.8S rRNA, LSU-rRNA)	0	X3	Biological process
GO:0034641	cellular nitrogen compound metabolic process	0.34137	6.684	-2.745	6.641	-8.0737	0.705	0.196	maturation of LSU-rRNA from tricistronic rRNA transcript (SSU-rRNA, 5.8S rRNA, LSU-rRNA)	0	X3	Biological process
GO:1901360	organic cyclic compound metabolic process	0.30324	0.981	-3.391	6.59	-1.9706	0.852	0.211	maturation of LSU-rRNA from tricistronic rRNA transcript (SSU-rRNA, 5.8S rRNA, LSU-rRNA)	0	X3	Biological process
GO:0006725	cellular aromatic compound metabolic process	0.29628	3.836	-5.847	6.58	-2.0182	0.811	0.26	maturation of LSU-rRNA from tricistronic rRNA transcript (SSU-rRNA, 5.8S rRNA, LSU-rRNA)	0	X3	Biological process
GO:0046483	heterocycle metabolic process	0.29664	4.285	-6.002	6.58	-2.2291	0.811	0.26	maturation of LSU-rRNA from tricistronic rRNA transcript (SSU-rRNA, 5.8S rRNA, LSU-rRNA)	0	X3	Biological process
GO:0006396	RNA processing	0.0321	6.358	2.315	5.615	-3.9666	0.632	0.315	maturation of LSU-rRNA from tricistronic rRNA transcript (SSU-rRNA, 5.8S rRNA, LSU-rRNA)	0	X3	Biological process
GO:0016072	rRNA metabolic process	0.00965	4.348	2.826	5.093	-3.5045	0.669	0.382	maturation of LSU-rRNA from tricistronic rRNA transcript (SSU-rRNA, 5.8S rRNA, LSU-rRNA)	0	X3	Biological process
GO:0034470	ncRNA processing	0.02222	null	null	5.455	-2.6271	0.545	0.773	maturation of LSU-rRNA from tricistronic rRNA transcript (SSU-rRNA, 5.8S rRNA, LSU-rRNA)	1	X3	Biological process
GO:0034660	ncRNA metabolic process	0.03407	5.898	1.432	5.641	-2.9318	0.655	0.453	maturation of LSU-rRNA from tricistronic rRNA transcript (SSU-rRNA, 5.8S rRNA, LSU-rRNA)	0	X3	Biological process
GO:0006139	nucleobase-containing compound metabolic process	0.26547	5.997	-1.36	6.532	-2.4248	0.646	0.484	maturation of LSU-rRNA from tricistronic rRNA transcript (SSU-rRNA, 5.8S rRNA, LSU-rRNA)	0	X3	Biological process
GO:0090304	nucleic acid metabolic process	0.21449	5.869	-0.185	6.44	-1.8477	0.613	0.597	maturation of LSU-rRNA from tricistronic rRNA transcript (SSU-rRNA, 5.8S rRNA, LSU-rRNA)	0	X3	Biological process
GO:0044085	cellular component biogenesis	0.04355	-2.347	6.073	5.747	-6.8447	0.767	0.608	maturation of LSU-rRNA from tricistronic rRNA transcript (SSU-rRNA, 5.8S rRNA, LSU-rRNA)	0	X3	Biological process
GO:0000463	maturation of LSU-rRNA from tricistronic rRNA transcript (SSU-rRNA, 5.8S rRNA, LSU-rRNA)	0.00037	1.824	5.205	3.676	-2.8097	0.518	0.668	maturation of LSU-rRNA from tricistronic rRNA transcript (SSU-rRNA, 5.8S rRNA, LSU-rRNA)	0	X3	Biological process
GO:0000470	maturation of LSU-rRNA	0.00047	null	null	3.779	-1.8761	0.511	0.833	maturation of LSU-rRNA from tricistronic rRNA transcript (SSU-rRNA, 5.8S rRNA, LSU-rRNA)	1	X3	Biological process
GO:0032270	positive regulation of cellular protein metabolic process	0.00445	null	null	4.756	-1.3969	0.73	0.8	positive regulation of cellular protein metabolic process	1	X3	Biological process
GO:0010608	posttranscriptional regulation of gene expression	0.00719	5.013	6.346	4.965	-1.9136	0.735	0.267	regulation of translation	0	X3	Biological process
GO:0043603	cellular amide metabolic process	0.06879	7.676	-2.81	5.946	-7.1694	0.748	0.31	regulation of translation	0	X3	Biological process
GO:0034248	regulation of cellular amide metabolic process	0.007	6.316	5.457	4.954	-2.3325	0.68	0.508	regulation of translation	0	X3	Biological process
GO:0006417	regulation of translation	0.00692	7.114	2.591	4.948	-2.3439	0.595	0.55	regulation of translation	0	X3	Biological process
GO:0022607	cellular component assembly	0.02484	null	null	5.503	-1.8268	0.687	0.766	ribosomal large subunit assembly	1	X3	Biological process
GO:0071826	ribonucleoprotein complex subunit organization	0.00377	-2.67	5.55	4.685	-2.3565	0.746	0.457	ribosomal large subunit assembly	0	X3	Biological process
GO:0070925	organelle assembly	0.00571	-2.384	5.85	4.865	-2.6459	0.713	0.636	ribosomal large subunit assembly	0	X3	Biological process
GO:0022618	ribonucleoprotein complex assembly	0.00364	null	null	4.669	-2.4191	0.683	0.825	ribosomal large subunit assembly	1	X3	Biological process
GO:0034622	cellular macromolecular complex assembly	0.01211	null	null	5.191	-2.433	0.685	0.752	ribosomal large subunit assembly	1	X3	Biological process
GO:0065003	macromolecular complex assembly	0.01497	null	null	5.283	-2.2815	0.683	0.848	ribosomal large subunit assembly	1	X3	Biological process
GO:0043933	macromolecular complex subunit organization	0.02371	-2.599	5.745	5.483	-1.9066	0.728	0.653	ribosomal large subunit assembly	0	X3	Biological process
GO:0000027	ribosomal large subunit assembly	0.00079	null	null	4.005	-1.5072	0.718	0.876	ribosomal large subunit assembly	1	X3	Biological process
GO:0042274	ribosomal small subunit biogenesis	0.00255	null	null	4.515	-3.0232	0.743	0.794	ribosomal small subunit biogenesis	1	X3	Biological process
GO:0006414	translational elongation	0.00777	7.4	2.105	4.999	-8.0969	0.62	0	translational elongation	0	X3	Biological process
GO:0009058	biosynthetic process	0.31611	-2.782	0.532	6.608	-3.27	0.926	0.066	translational initiation	0	X3	Biological process
GO:0019538	protein metabolic process	0.18489	3.745	4.49	6.375	-1.6556	0.765	0.339	translational initiation	0	X3	Biological process
GO:0044267	cellular protein metabolic process	0.14293	5.218	1.355	6.263	-1.8447	0.686	0.404	translational initiation	0	X3	Biological process
GO:1901566	organonitrogen compound biosynthetic process	0.14064	7.546	-0.884	6.256	-5.065	0.675	0.415	translational initiation	0	X3	Biological process
GO:1901564	organonitrogen compound metabolic process	0.17886	7.253	-1.772	6.361	-1.6003	0.749	0.415	translational initiation	0	X3	Biological process
GO:0044260	cellular macromolecule metabolic process	0.34276	4.366	-0.771	6.643	-1.5918	0.69	0.417	translational initiation	0	X3	Biological process
GO:0034645	cellular macromolecule biosynthetic process	0.19291	5.866	0.18	6.394	-4.5686	0.63	0.46	translational initiation	0	X3	Biological process
GO:0009059	macromolecule biosynthetic process	0.19548	4.812	0.918	6.399	-4.5214	0.697	0.506	translational initiation	0	X3	Biological process
GO:0006413	translational initiation	0.00518	7.447	2.499	4.823	-3.284	0.634	0.534	translational initiation	0	X3	Biological process
GO:0044271	cellular nitrogen compound biosynthetic process	0.22502	6.471	-1.698	6.46	-4.2865	0.648	0.536	translational initiation	0	X3	Biological process
GO:1901576	organic substance biosynthetic process	0.30365	4.575	-2.895	6.591	-3.4584	0.756	0.587	translational initiation	0	X3	Biological process
GO:0044249	cellular biosynthetic process	0.30048	5.678	-3.824	6.586	-3.4168	0.725	0.658	translational initiation	0	X3	Biological process
GO:0006412	translation	0.05686	6.676	1.337	5.863	-8.1938	0.527	0.696	translational initiation	0	X3	Biological process
GO:0006518	peptide metabolic process	0.05961	null	null	5.884	-7.8697	0.639	0.895	translational initiation	1	X3	Biological process
GO:0043604	amide biosynthetic process	0.06374	null	null	5.913	-7.8827	0.627	0.887	translational initiation	1	X3	Biological process
GO:0043043	peptide biosynthetic process	0.0577	null	null	5.869	-8.2725	0.612	0.927	translational initiation	1	X3	Biological process
GO:0003735	structural constituent of ribosome	0.02679	5.665	-2.512	5.577	-10.9318	0.882	0	structural constituent of ribosome	0	X3	Molecular function
GO:0003743	translation initiation factor activity	0.00411	-6.326	3.05	4.762	-6.2557	0.695	0	translation initiation factor activity	0	X3	Molecular function
GO:0005198	structural molecule activity	0.03268	1.537	-6.515	5.663	-10.3595	0.883	0	structural constituent of ribosome	0	X3	Molecular function
GO:0005488	binding	0.55656	-2.01	7.798	6.894	-15.6716	0.945	0	RNA cap binding	0	X3	Molecular function
GO:0016684	oxidoreductase activity, acting on peroxide as acceptor	0.00452	1.696	-0.275	4.803	-2.4498	0.879	0	structural constituent of ribosome	0	X3	Molecular function
GO:0045182	translation regulator activity	0.0001	6.143	1.056	3.164	-5.8069	0.879	0	translation initiation factor activity	0	X3	Molecular function
GO:0051082	unfolded protein binding	0.00486	3.008	4.974	4.835	-5.0921	0.713	0.048	unfolded protein binding	0	X3	Molecular function
GO:0005515	protein binding	0.0441	-2.293	-6.21	5.793	-2.6635	0.794	0.062	chaperone binding	0	X3	Molecular function
GO:0097159	organic cyclic compound binding	0.41137	-5.621	-4.106	6.763	-13.5072	0.789	0.13	RNA cap binding	0	X3	Molecular function
GO:0003676	nucleic acid binding	0.21226	-6.05	-1.654	6.475	-14.3134	0.75	0.213	RNA cap binding	0	X3	Molecular function
GO:0003723	RNA binding	0.05283	-6.166	1.069	5.871	-19.1752	0.714	0.289	RNA cap binding	0	X3	Molecular function
GO:1901363	heterocyclic compound binding	0.41115	-4.582	-3.952	6.763	-13.4976	0.789	0.292	RNA cap binding	0	X3	Molecular function
GO:0000339	RNA cap binding	0.00025	-5.736	4.328	3.554	-1.9318	0.725	0.405	RNA cap binding	0	X3	Molecular function
GO:0003729	mRNA binding	0.00168	-5.669	3.383	4.373	-2.8827	0.705	0.469	mRNA binding	0	X3	Molecular function
GO:0051087	chaperone binding	0.00101	2.268	5.516	4.155	-2.451	0.728	0.488	chaperone binding	0	X3	Molecular function
GO:0051020	GTPase binding	0.00159	2.955	5.54	4.349	-2.2013	0.724	0.507	GTPase binding	0	X3	Molecular function
GO:0005623	cell	0.53553	2.367	4.785	6.722	-17.4179	0.973	0	chaperonin-containing T-complex	0	X3	Cellular component
GO:0005829	cytosol	0.02553	3.931	-7.322	5.4	-26.7235	0.602	0	chaperonin-containing T-complex	0	X3	Cellular component
GO:0031974	membrane-enclosed lumen	0.02742	-0.947	4.199	5.431	-1.7235	0.944	0	intracellular organelle lumen	0	X3	Cellular component
GO:0043226	organelle	0.20788	-5.205	0.506	6.311	-6.2765	0.954	0	cytosolic small ribosomal subunit	0	X3	Cellular component
GO:0009505	plant-type cell wall	0.00021	-6.376	-2.167	3.31	-1.6234	0.872	0.051	plant-type cell wall	0	X3	Cellular component
GO:0005844	polysome	0.00037	-2.014	-7.549	3.559	-1.585	0.639	0.115	polysome	0	X3	Cellular component
GO:0005622	intracellular	0.41175	8.23	-2.371	6.608	-17.5072	0.767	0.135	chaperonin-containing T-complex	0	X3	Cellular component
GO:0070013	intracellular organelle lumen	0.02741	3.334	-2.495	5.431	-1.7399	0.484	0.183	intracellular organelle lumen	0	X3	Cellular component
GO:0043233	organelle lumen	0.02741	null	null	5.431	-1.752	0.571	0.973	intracellular organelle lumen	1	X3	Cellular component
GO:0005737	cytoplasm	0.26017	5.46	-5.335	6.408	-19.3458	0.637	0.276	chaperonin-containing T-complex	0	X3	Cellular component
GO:0005852	eukaryotic translation initiation factor 3 complex	0.00117	0.435	-8.257	4.06	-8.1029	0.639	0.346	eukaryotic translation initiation factor 3 complex	0	X3	Cellular component
GO:0019773	proteasome core complex, alpha-subunit complex	0.00073	-2.309	-6.196	3.856	-1.9245	0.678	0.368	proteasome core complex, alpha-subunit complex	0	X3	Cellular component
GO:0044464	cell part	0.52385	8.383	-3.219	6.712	-17.3675	0.771	0.378	chaperonin-containing T-complex	0	X3	Cellular component
GO:0044444	cytoplasmic part	0.12659	4.766	-6.202	6.095	-20.4609	0.623	0.389	chaperonin-containing T-complex	0	X3	Cellular component
GO:0044445	cytosolic part	0.00496	3.626	-8.473	4.688	-22.1163	0.6	0.402	chaperonin-containing T-complex	0	X3	Cellular component
GO:0043228	non-membrane-bounded organelle	0.08408	2.113	-0.266	5.918	-10.2993	0.629	0.41	cytosolic small ribosomal subunit	0	X3	Cellular component
GO:0044424	intracellular part	0.35654	6.464	-4.76	6.545	-17.4802	0.675	0.439	chaperonin-containing T-complex	0	X3	Cellular component
GO:0044422	organelle part	0.09427	1.61	-0.471	5.967	-9.2027	0.624	0.514	cytosolic small ribosomal subunit	0	X3	Cellular component
GO:0005634	nucleus	0.08965	3.826	-3.365	5.946	-1.3936	0.505	0.521	nuclear part	0	X3	Cellular component
GO:0005840	ribosome	0.04198	1.796	-5.305	5.616	-14.5287	0.354	0.528	cytosolic small ribosomal subunit	0	X3	Cellular component
GO:0044391	ribosomal subunit	0.0111	null	null	5.038	-14.0155	0.381	0.726	cytosolic small ribosomal subunit	1	X3	Cellular component
GO:0043232	intracellular non-membrane-bounded organelle	0.07946	null	null	5.893	-10.2733	0.446	0.795	cytosolic small ribosomal subunit	1	X3	Cellular component
GO:0005732	small nucleolar ribonucleoprotein complex	0.00072	-1.371	-7.376	3.852	-1.5575	0.624	0.535	small nucleolar ribonucleoprotein complex	0	X3	Cellular component
GO:1990904	ribonucleoprotein complex	0.05291	-3.389	-7.169	5.717	-14.015	0.705	0.553	polysome	0	X3	Cellular component
GO:0044428	nuclear part	0.0312	3.303	-2.834	5.487	-1.6038	0.484	0.606	nuclear part	0	X3	Cellular component
GO:0044446	intracellular organelle part	0.08938	null	null	5.944	-9.1838	0.433	0.727	cytosolic small ribosomal subunit	1	X3	Cellular component
GO:0022626	cytosolic ribosome	0.00187	0.752	-5.837	4.265	-15.4535	0.429	0.617	cytosolic small ribosomal subunit	0	X3	Cellular component
GO:0005832	chaperonin-containing T-complex	0.00021	null	null	3.306	-7.8827	0.598	0.715	chaperonin-containing T-complex	1	X3	Cellular component
GO:0022625	cytosolic large ribosomal subunit	0.00092	null	null	3.955	-6.6615	0.404	0.886	cytosolic large ribosomal subunit	1	X3	Cellular component
GO:0022627	cytosolic small ribosomal subunit	0.00078	null	null	3.887	-8.4318	0.41	0.786	cytosolic small ribosomal subunit	1	X3	Cellular component
GO:0043229	intracellular organelle	0.19917	3.957	-3.818	6.292	-6.2612	0.465	0.626	cytosolic small ribosomal subunit	0	X3	Cellular component
GO:0015935	small ribosomal subunit	0.00551	1.004	-5.271	4.734	-7.4123	0.386	0.665	cytosolic small ribosomal subunit	0	X3	Cellular component
GO:0015934	large ribosomal subunit	0.00559	null	null	4.74	-6.153	0.385	0.857	cytosolic large ribosomal subunit	1	X3	Cellular component
GO:0004553	hydrolase activity, hydrolyzing O-glycosyl compounds	0.0149	0.694	0.423	5.322	-1.821	0.003	0	chitinase activity	0	X614	Molecular function
GO:0016798	hydrolase activity, acting on glycosyl bonds	0.01822	-0.362	0.209	5.409	-1.9031	0.075	0.284	chitinase activity	0	X614	Molecular function
GO:0004568	chitinase activity	0.00021	0.779	-0.104	3.478	-1.4112	0.009	0.621	chitinase activity	0	X614	Molecular function
GO:0006575	cellular modified amino acid metabolic process	0.00785	4.7	1.99	5.003	-2.3625	0.12	0	glutathione metabolic process	0	X733	Biological process
GO:0006790	sulfur compound metabolic process	0.01822	-5.104	0.018	5.369	-1.6216	0.2	0.067	glutathione metabolic process	0	X733	Biological process
GO:0006749	glutathione metabolic process	0.00151	4.686	-2.022	4.288	-2.4067	0.121	0.249	glutathione metabolic process	0	X733	Biological process
GO:0061650	ubiquitin-like protein conjugating enzyme activity	8e-05	0.585	1	3.031	-1.7077	0.342	0	ubiquitin conjugating enzyme activity	0	X904	Molecular function
GO:0061631	ubiquitin conjugating enzyme activity	7e-05	1	0.585	3.015	-1.4522	0.342	0.585	ubiquitin conjugating enzyme activity	0	X904	Molecular function
