# Supplementary material for: Membrane-Enriched Proteomics Link Ribosome Accumulation and Proteome Reprogramming With Cold Acclimation in Barley Root Meristems
Source: Front Plant Sci. 2021 Apr 30;12:656683. doi: 10.3389/fpls.2021.656683 (PMC8121087; doi:10.3389/fpls.2021.656683)
Supplement: Supplementary file 6 [file Table_6.XLSX]

## Sheet: Supplementary Table 6
	Supplementary Table 6. Protein inventory within statistically relevant GO functional groups. See also Figure 5 and Table 1. Statistical filters were implemented in a log2-transformed, pooled- and TMT-normalized matrix in order to select proteins with similar relative changes. The former procedure generated clusters of HORVU identifiers with similar responses that were then used as input for a GO …
	Gene ID	Mapped IDs	Gene Name; Gene Symbol; Ortholog	PANTHER Family/Subfamily	PANTHER Protein Class		Tip Adjacent Control	Tip Adjacent Cold	Tip Adjacent Chitin	Tip Adjacent Chitosan	Tip Control	Tip Cold	Tip Chitin	Tip Chitosan
1	HORVV|EnsemblGenome=HORVU6Hr1G058930|UniProtKB=A0A287UB49	HORVU6Hr1G058930	Uncharacterized protein;HORVU6Hr1G058930;ortholog	AQUAPORIN PIP2-2-RELATED (PTHR45687:SF55)
	HORVV|EnsemblGenome=HORVU7Hr1G081770|UniProtKB=A0A287X340	HORVU7Hr1G081770	Uncharacterized protein;HORVU7Hr1G081770;ortholog	AQUAPORIN TIP2-1 (PTHR45665:SF48)
	HORVV|EnsemblGenome=HORVU4Hr1G079230|UniProtKB=D2KZ38	HORVU4Hr1G079230	Predicted protein;HvTIP1;1;ortholog	AQUAPORIN-8 (PTHR45665:SF9)
	HORVV|EnsemblGenome=HORVU5Hr1G055200|UniProtKB=A0A287R9Z4	HORVU5Hr1G055200	Uncharacterized protein;HORVU5Hr1G055200;ortholog	AQUAPORIN (PTHR45687:SF12)
2	HORVV|EnsemblGenome=HORVU1Hr1G049280|UniProtKB=M0V1L7	HORVU1Hr1G049280	Uncharacterized protein;HORVU1Hr1G049280;ortholog	GLUTATHIONE S-TRANSFERASE GSTU6-RELATED (PTHR11260:SF326)	transferase(PC00220)
	HORVV|EnsemblGenome=HORVU2Hr1G043890|UniProtKB=A0A287HUJ7	HORVU2Hr1G043890	Uncharacterized protein;HORVU2Hr1G043890;ortholog	GLYCO_HYDRO_18 DOMAIN-CONTAINING PROTEIN (PTHR45708:SF34)
	HORVV|EnsemblGenome=HORVU7Hr1G098110|UniProtKB=A0A287XIA5	HORVU7Hr1G098110	Peroxidase;HORVU7Hr1G098110;ortholog	PEROXIDASE (PTHR31388:SF52)	peroxidase(PC00180)
	HORVV|EnsemblGenome=HORVU5Hr1G093700|UniProtKB=A0A287SAK2	HORVU5Hr1G093700	Lipoxygenase;HORVU5Hr1G093700;ortholog	LINOLEATE 9S-LIPOXYGENASE 2 (PTHR11771:SF54)	oxygenase(PC00177)
	HORVV|EnsemblGenome=HORVU6Hr1G088420|UniProtKB=A0A287V3C0	HORVU6Hr1G088420	Fe2OG dioxygenase domain-containing protein;HORVU6Hr1G088420;ortholog	DIOX_N DOMAIN-CONTAINING PROTEIN (PTHR47991:SF72)	oxygenase(PC00177)
	HORVV|EnsemblGenome=HORVU7Hr1G036460|UniProtKB=A0A287W1Q9	HORVU7Hr1G036460	Patatin;HORVU7Hr1G036460;ortholog	PATATIN (PTHR32176:SF97)	isomerase(PC00135)
	HORVV|EnsemblGenome=HORVU7Hr1G018880|UniProtKB=A0A287VL85	HORVU7Hr1G018880	Uncharacterized protein;HORVU7Hr1G018880;ortholog	SUBFAMILY NOT NAMED (PTHR11746:SF224)	methyltransferase(PC00155)
	HORVV|EnsemblGenome=HORVU7Hr1G042240|UniProtKB=A0A287W7W8	HORVU7Hr1G042240	GSDH domain-containing protein;HORVU7Hr1G042240;ortholog	GSDH DOMAIN-CONTAINING PROTEIN (PTHR19328:SF35)	protein-binding activity modulator(PC00095)
	HORVV|EnsemblGenome=HORVU1Hr1G024240|UniProtKB=A0A287EXW6	HORVU1Hr1G024240	Uncharacterized protein;HORVU1Hr1G024240;ortholog	OS05G0163700 PROTEIN (PTHR43188:SF10)	oxidase(PC00175)
	HORVV|EnsemblGenome=HORVU7Hr1G113270|UniProtKB=A0A287XUL5	HORVU7Hr1G113270	Chitinase;HORVU7Hr1G113270;ortholog	CHITINASE 12 (PTHR22595:SF79)
	HORVV|EnsemblGenome=HORVU6Hr1G090510|UniProtKB=M0V8J0	HORVU6Hr1G090510	Uncharacterized protein;HORVU6Hr1G090510;ortholog	SUBFAMILY NOT NAMED (PTHR11746:SF200)	methyltransferase(PC00155)
	HORVV|EnsemblGenome=HORVU4Hr1G085050|UniProtKB=A0A287PY32	HORVU4Hr1G085050	Purple acid phosphatase;HORVU4Hr1G085050;ortholog	PURPLE ACID PHOSPHATASE (PTHR45778:SF39)	phosphatase(PC00181)
	HORVV|EnsemblGenome=HORVU2Hr1G043900|UniProtKB=A0A287HUJ1	HORVU2Hr1G043900	Glyco_hydro_18 domain-containing protein;HORVU2Hr1G043900;ortholog	XYLANASE INHIBITOR PROTEIN 1 (PTHR45708:SF9)
	HORVV|EnsemblGenome=HORVU7Hr1G114000|UniProtKB=A0A287XV90	HORVU7Hr1G114000	Uncharacterized protein;HORVU7Hr1G114000;ortholog	ALDEHYDE OXIDASE-LIKE PROTEIN-RELATED (PTHR11908:SF89)	oxidoreductase(PC00176)
	HORVV|EnsemblGenome=HORVU1Hr1G092110|UniProtKB=A0A287GR69	HORVU1Hr1G092110	Glutamine amidotransferase type-2 domain-containing protein;HORVU1Hr1G092110;ortholog	ASPARAGINE SYNTHETASE [GLUTAMINE-HYDROLYZING] 2 (PTHR11772:SF44)	ligase(PC00142)
	HORVV|EnsemblGenome=HORVU4Hr1G026720|UniProtKB=A0A287NMB4	HORVU4Hr1G026720	Non-reducing end alpha-L-arabinofuranosidase;HORVU4Hr1G026720;ortholog	OS12G0129300 PROTEIN (PTHR31776:SF22)
	HORVV|EnsemblGenome=HORVU3Hr1G074040|UniProtKB=A0A287LNI8	HORVU3Hr1G074040	Glutathione transferase;HORVU3Hr1G074040;ortholog	GLUTATHIONE S-TRANSFERASE GSTF2-RELATED (PTHR43900:SF39)	transferase(PC00220)
	HORVV|EnsemblGenome=HORVU7Hr1G021430|UniProtKB=M0YC28	HORVU7Hr1G021430	Uncharacterized protein;HORVU7Hr1G021430;ortholog	SUBFAMILY NOT NAMED (PTHR31642:SF178)	acetyltransferase(PC00038)
	HORVV|EnsemblGenome=HORVU1Hr1G062030|UniProtKB=F2DT67	HORVU1Hr1G062030	Chitinase;HORVU1Hr1G062030;ortholog	CHITINASE 2 (PTHR22595:SF140)
	HORVV|EnsemblGenome=HORVU5Hr1G119820|UniProtKB=M0WCZ3	HORVU5Hr1G119820	Patatin;HORVU5Hr1G119820;ortholog	PATATIN (PTHR32176:SF36)	isomerase(PC00135)
	HORVV|EnsemblGenome=HORVU1Hr1G072250|UniProtKB=F2DC79	HORVU1Hr1G072250	Glyco_hydro_18 domain-containing protein;HORVU1Hr1G072250;ortholog	GLYCO_HYDRO_18 DOMAIN-CONTAINING PROTEIN (PTHR46476:SF15)
	HORVV|EnsemblGenome=HORVU6Hr1G013700|UniProtKB=A0A287TDQ1	HORVU6Hr1G013700	Uncharacterized protein;HORVU6Hr1G013700;ortholog	LIPASE_GDSL DOMAIN-CONTAINING PROTEIN (PTHR22835:SF643)
	HORVV|EnsemblGenome=HORVU3Hr1G006440|UniProtKB=A0A287K155	HORVU3Hr1G006440	Uncharacterized protein;HORVU3Hr1G006440;ortholog	EUKARYOTIC ASPARTYL PROTEASE FAMILY PROTEIN (PTHR47965:SF71)	protease(PC00190)
	HORVV|EnsemblGenome=HORVU1Hr1G001570|UniProtKB=M0Z2T7	HORVU1Hr1G001570	Uncharacterized protein;HORVU1Hr1G001570;ortholog	DIMERISATION DOMAIN-CONTAINING PROTEIN (PTHR11746:SF210)	methyltransferase(PC00155)
	HORVV|EnsemblGenome=HORVU6Hr1G058820|UniProtKB=A0A287UB62	HORVU6Hr1G058820	Phenylalanine ammonia-lyase;HORVU6Hr1G058820;ortholog	PHENYLALANINE AMMONIA-LYASE (PTHR10362:SF11)	lyase(PC00144)
	HORVV|EnsemblGenome=HORVU4Hr1G072480|UniProtKB=Q70DK2	HORVU4Hr1G072480	Phytocyanin domain-containing protein;bcb;ortholog	PHYTOCYANIN DOMAIN-CONTAINING PROTEIN (PTHR33021:SF245)
	HORVV|EnsemblGenome=HORVU2Hr1G024280|UniProtKB=A0A287HE99	HORVU2Hr1G024280	Peroxidase;HORVU2Hr1G024280;ortholog	PEROXIDASE (PTHR31388:SF174)	peroxidase(PC00180)
	HORVV|EnsemblGenome=HORVU4Hr1G090050|UniProtKB=A0A287Q3Y1	HORVU4Hr1G090050	Peroxidase;HORVU4Hr1G090050;ortholog	PEROXIDASE (PTHR31388:SF125)	peroxidase(PC00180)
	HORVV|EnsemblGenome=HORVU2Hr1G028430|UniProtKB=M0Z404	HORVU2Hr1G028430	Uncharacterized protein;HORVU2Hr1G028430;ortholog	OS07G0629900 PROTEIN (PTHR11240:SF18)
	HORVV|EnsemblGenome=HORVU5Hr1G070040|UniProtKB=M0YH64	HORVU5Hr1G070040	Phytocyanin domain-containing protein;HORVU5Hr1G070040;ortholog	PHYTOCYANIN DOMAIN-CONTAINING PROTEIN (PTHR33021:SF439)
	HORVV|EnsemblGenome=HORVU1Hr1G057680|UniProtKB=M0XT04	HORVU1Hr1G057680	Uncharacterized protein;HORVU1Hr1G057680;ortholog	OS05G0375400 PROTEIN (PTHR32227:SF119)	glucosidase(PC00108)
	HORVV|EnsemblGenome=HORVU3Hr1G106140|UniProtKB=A0A287MKB2	HORVU3Hr1G106140	Uncharacterized protein;HORVU3Hr1G106140;ortholog	SUBFAMILY NOT NAMED (PTHR32227:SF258)	glucosidase(PC00108)
	HORVV|EnsemblGenome=HORVU7Hr1G089300|UniProtKB=A0A287X8Y5	HORVU7Hr1G089300	Peroxidase;HORVU7Hr1G089300;ortholog	PEROXIDASE 22-RELATED (PTHR31388:SF255)	peroxidase(PC00180)
	HORVV|EnsemblGenome=HORVU7Hr1G036390|UniProtKB=A0A287W2D5	HORVU7Hr1G036390	Phytocyanin domain-containing protein;HORVU7Hr1G036390;ortholog	PHYTOCYANIN DOMAIN-CONTAINING PROTEIN (PTHR33021:SF193)
	HORVV|EnsemblGenome=HORVU7Hr1G007220|UniProtKB=F2E6J2	HORVU7Hr1G007220	Sucrose synthase;HORVU7Hr1G007220;ortholog	SUCROSE SYNTHASE 1 (PTHR45839:SF7)
	HORVV|EnsemblGenome=HORVU1Hr1G089380|UniProtKB=F2DI94	HORVU1Hr1G089380	Predicted protein;HORVU1Hr1G089380;ortholog	FN3_6 DOMAIN-CONTAINING PROTEIN (PTHR10795:SF583)	serine protease(PC00203)
	HORVV|EnsemblGenome=HORVU7Hr1G083550|UniProtKB=A0A287X4Q3	HORVU7Hr1G083550	Peroxidase;HORVU7Hr1G083550;ortholog	PEROXIDASE (PTHR31235:SF230)	peroxidase(PC00180)
	HORVV|EnsemblGenome=HORVU5Hr1G119810|UniProtKB=M0XQA8	HORVU5Hr1G119810	Patatin;HORVU5Hr1G119810;ortholog	PATATIN (PTHR32176:SF70)	isomerase(PC00135)
	HORVV|EnsemblGenome=HORVU2Hr1G124970|UniProtKB=F2DP54	HORVU2Hr1G124970	Peroxidase;HORVU2Hr1G124970;ortholog	PEROXIDASE (PTHR31235:SF373)	peroxidase(PC00180)
	HORVV|EnsemblGenome=HORVU1Hr1G016660|UniProtKB=A0A287ERB5	HORVU1Hr1G016660	Peroxidase;HORVU1Hr1G016660;ortholog	PEROXIDASE (PTHR31235:SF176)	peroxidase(PC00180)
3	HORVV|EnsemblGenome=HORVU2Hr1G043890|UniProtKB=A0A287HUJ7	HORVU2Hr1G043890	Uncharacterized protein;HORVU2Hr1G043890;ortholog	GLYCO_HYDRO_18 DOMAIN-CONTAINING PROTEIN (PTHR45708:SF34)
	HORVV|EnsemblGenome=HORVU7Hr1G113270|UniProtKB=A0A287XUL5	HORVU7Hr1G113270	Chitinase;HORVU7Hr1G113270;ortholog	CHITINASE 12 (PTHR22595:SF79)
	HORVV|EnsemblGenome=HORVU2Hr1G043900|UniProtKB=A0A287HUJ1	HORVU2Hr1G043900	Glyco_hydro_18 domain-containing protein;HORVU2Hr1G043900;ortholog	XYLANASE INHIBITOR PROTEIN 1 (PTHR45708:SF9)
	HORVV|EnsemblGenome=HORVU4Hr1G026720|UniProtKB=A0A287NMB4	HORVU4Hr1G026720	Non-reducing end alpha-L-arabinofuranosidase;HORVU4Hr1G026720;ortholog	OS12G0129300 PROTEIN (PTHR31776:SF22)
	HORVV|EnsemblGenome=HORVU1Hr1G062030|UniProtKB=F2DT67	HORVU1Hr1G062030	Chitinase;HORVU1Hr1G062030;ortholog	CHITINASE 2 (PTHR22595:SF140)
	HORVV|EnsemblGenome=HORVU1Hr1G072250|UniProtKB=F2DC79	HORVU1Hr1G072250	Glyco_hydro_18 domain-containing protein;HORVU1Hr1G072250;ortholog	GLYCO_HYDRO_18 DOMAIN-CONTAINING PROTEIN (PTHR46476:SF15)
	HORVV|EnsemblGenome=HORVU1Hr1G057680|UniProtKB=M0XT04	HORVU1Hr1G057680	Uncharacterized protein;HORVU1Hr1G057680;ortholog	OS05G0375400 PROTEIN (PTHR32227:SF119)	glucosidase(PC00108)
	HORVV|EnsemblGenome=HORVU3Hr1G106140|UniProtKB=A0A287MKB2	HORVU3Hr1G106140	Uncharacterized protein;HORVU3Hr1G106140;ortholog	SUBFAMILY NOT NAMED (PTHR32227:SF258)	glucosidase(PC00108)
4	HORVV|EnsemblGenome=HORVU7Hr1G018880|UniProtKB=A0A287VL85	HORVU7Hr1G018880	Uncharacterized protein;HORVU7Hr1G018880;ortholog	SUBFAMILY NOT NAMED (PTHR11746:SF224)	methyltransferase(PC00155)
	HORVV|EnsemblGenome=HORVU6Hr1G090510|UniProtKB=M0V8J0	HORVU6Hr1G090510	Uncharacterized protein;HORVU6Hr1G090510;ortholog	SUBFAMILY NOT NAMED (PTHR11746:SF200)	methyltransferase(PC00155)
	HORVV|EnsemblGenome=HORVU1Hr1G001570|UniProtKB=M0Z2T7	HORVU1Hr1G001570	Uncharacterized protein;HORVU1Hr1G001570;ortholog	DIMERISATION DOMAIN-CONTAINING PROTEIN (PTHR11746:SF210)	methyltransferase(PC00155)
5	HORVV|EnsemblGenome=HORVU7Hr1G098110|UniProtKB=A0A287XIA5	HORVU7Hr1G098110	Peroxidase;HORVU7Hr1G098110;ortholog	PEROXIDASE (PTHR31388:SF52)	peroxidase(PC00180)
	HORVV|EnsemblGenome=HORVU5Hr1G093700|UniProtKB=A0A287SAK2	HORVU5Hr1G093700	Lipoxygenase;HORVU5Hr1G093700;ortholog	LINOLEATE 9S-LIPOXYGENASE 2 (PTHR11771:SF54)	oxygenase(PC00177)
	HORVV|EnsemblGenome=HORVU6Hr1G088420|UniProtKB=A0A287V3C0	HORVU6Hr1G088420	Fe2OG dioxygenase domain-containing protein;HORVU6Hr1G088420;ortholog	DIOX_N DOMAIN-CONTAINING PROTEIN (PTHR47991:SF72)	oxygenase(PC00177)
	HORVV|EnsemblGenome=HORVU1Hr1G024240|UniProtKB=A0A287EXW6	HORVU1Hr1G024240	Uncharacterized protein;HORVU1Hr1G024240;ortholog	OS05G0163700 PROTEIN (PTHR43188:SF10)	oxidase(PC00175)
	HORVV|EnsemblGenome=HORVU7Hr1G114000|UniProtKB=A0A287XV90	HORVU7Hr1G114000	Uncharacterized protein;HORVU7Hr1G114000;ortholog	ALDEHYDE OXIDASE-LIKE PROTEIN-RELATED (PTHR11908:SF89)	oxidoreductase(PC00176)
	HORVV|EnsemblGenome=HORVU4Hr1G072480|UniProtKB=Q70DK2	HORVU4Hr1G072480	Phytocyanin domain-containing protein;bcb;ortholog	PHYTOCYANIN DOMAIN-CONTAINING PROTEIN (PTHR33021:SF245)
	HORVV|EnsemblGenome=HORVU2Hr1G024280|UniProtKB=A0A287HE99	HORVU2Hr1G024280	Peroxidase;HORVU2Hr1G024280;ortholog	PEROXIDASE (PTHR31388:SF174)	peroxidase(PC00180)
	HORVV|EnsemblGenome=HORVU4Hr1G090050|UniProtKB=A0A287Q3Y1	HORVU4Hr1G090050	Peroxidase;HORVU4Hr1G090050;ortholog	PEROXIDASE (PTHR31388:SF125)	peroxidase(PC00180)
	HORVV|EnsemblGenome=HORVU5Hr1G070040|UniProtKB=M0YH64	HORVU5Hr1G070040	Phytocyanin domain-containing protein;HORVU5Hr1G070040;ortholog	PHYTOCYANIN DOMAIN-CONTAINING PROTEIN (PTHR33021:SF439)
	HORVV|EnsemblGenome=HORVU7Hr1G089300|UniProtKB=A0A287X8Y5	HORVU7Hr1G089300	Peroxidase;HORVU7Hr1G089300;ortholog	PEROXIDASE 22-RELATED (PTHR31388:SF255)	peroxidase(PC00180)
	HORVV|EnsemblGenome=HORVU7Hr1G036390|UniProtKB=A0A287W2D5	HORVU7Hr1G036390	Phytocyanin domain-containing protein;HORVU7Hr1G036390;ortholog	PHYTOCYANIN DOMAIN-CONTAINING PROTEIN (PTHR33021:SF193)
	HORVV|EnsemblGenome=HORVU7Hr1G083550|UniProtKB=A0A287X4Q3	HORVU7Hr1G083550	Peroxidase;HORVU7Hr1G083550;ortholog	PEROXIDASE (PTHR31235:SF230)	peroxidase(PC00180)
	HORVV|EnsemblGenome=HORVU2Hr1G124970|UniProtKB=F2DP54	HORVU2Hr1G124970	Peroxidase;HORVU2Hr1G124970;ortholog	PEROXIDASE (PTHR31235:SF373)	peroxidase(PC00180)
	HORVV|EnsemblGenome=HORVU1Hr1G016660|UniProtKB=A0A287ERB5	HORVU1Hr1G016660	Peroxidase;HORVU1Hr1G016660;ortholog	PEROXIDASE (PTHR31235:SF176)	peroxidase(PC00180)
6	HORVV|EnsemblGenome=HORVU7Hr1G098110|UniProtKB=A0A287XIA5	HORVU7Hr1G098110	Peroxidase;HORVU7Hr1G098110;ortholog	PEROXIDASE (PTHR31388:SF52)	peroxidase(PC00180)
	HORVV|EnsemblGenome=HORVU2Hr1G024280|UniProtKB=A0A287HE99	HORVU2Hr1G024280	Peroxidase;HORVU2Hr1G024280;ortholog	PEROXIDASE (PTHR31388:SF174)	peroxidase(PC00180)
	HORVV|EnsemblGenome=HORVU4Hr1G090050|UniProtKB=A0A287Q3Y1	HORVU4Hr1G090050	Peroxidase;HORVU4Hr1G090050;ortholog	PEROXIDASE (PTHR31388:SF125)	peroxidase(PC00180)
	HORVV|EnsemblGenome=HORVU7Hr1G089300|UniProtKB=A0A287X8Y5	HORVU7Hr1G089300	Peroxidase;HORVU7Hr1G089300;ortholog	PEROXIDASE 22-RELATED (PTHR31388:SF255)	peroxidase(PC00180)
	HORVV|EnsemblGenome=HORVU7Hr1G083550|UniProtKB=A0A287X4Q3	HORVU7Hr1G083550	Peroxidase;HORVU7Hr1G083550;ortholog	PEROXIDASE (PTHR31235:SF230)	peroxidase(PC00180)
	HORVV|EnsemblGenome=HORVU2Hr1G124970|UniProtKB=F2DP54	HORVU2Hr1G124970	Peroxidase;HORVU2Hr1G124970;ortholog	PEROXIDASE (PTHR31235:SF373)	peroxidase(PC00180)
	HORVV|EnsemblGenome=HORVU1Hr1G016660|UniProtKB=A0A287ERB5	HORVU1Hr1G016660	Peroxidase;HORVU1Hr1G016660;ortholog	PEROXIDASE (PTHR31235:SF176)	peroxidase(PC00180)
7	HORVV|EnsemblGenome=HORVU3Hr1G060920|UniProtKB=A0A287L9N3	HORVU3Hr1G060920	Lactamase_B domain-containing protein;HORVU3Hr1G060920;ortholog	PERSULFIDE DIOXYGENASE ETHE1, MITOCHONDRIAL (PTHR43084:SF1)	oxygenase(PC00177)
	HORVV|EnsemblGenome=HORVU4Hr1G057740|UniProtKB=A0A287P6V4	HORVU4Hr1G057740	Uncharacterized protein;HORVU4Hr1G057740;ortholog	PROTEIN IN2-1 HOMOLOG A (PTHR44328:SF5)	transferase(PC00220)
	HORVV|EnsemblGenome=HORVU6Hr1G026810|UniProtKB=F2DRX2	HORVU6Hr1G026810	Predicted protein;HORVU6Hr1G026810;ortholog	GLUTATHIONE-S-TRANSFERASE 28E45 (PTHR11260:SF530)	transferase(PC00220)
	HORVV|EnsemblGenome=HORVU5Hr1G103430|UniProtKB=M0YJ76	HORVU5Hr1G103430	Uncharacterized protein;HORVU5Hr1G103430;ortholog	GLUTATHIONE TRANSFERASE5 (PTHR11260:SF732)	transferase(PC00220)
	HORVV|EnsemblGenome=HORVU1Hr1G049190|UniProtKB=A0A287FGZ3	HORVU1Hr1G049190	Uncharacterized protein;HORVU1Hr1G049190;ortholog	SUBFAMILY NOT NAMED (PTHR11260:SF670)	transferase(PC00220)
	HORVV|EnsemblGenome=HORVU4Hr1G057890|UniProtKB=A0A287P7E2	HORVU4Hr1G057890	Uncharacterized protein;HORVU4Hr1G057890;ortholog	GLUTATHIONE S-TRANSFERASE L2, CHLOROPLASTIC (PTHR44328:SF11)	transferase(PC00220)
8	HORVV|EnsemblGenome=HORVU4Hr1G057740|UniProtKB=A0A287P6V4	HORVU4Hr1G057740	Uncharacterized protein;HORVU4Hr1G057740;ortholog	PROTEIN IN2-1 HOMOLOG A (PTHR44328:SF5)	transferase(PC00220)
	HORVV|EnsemblGenome=HORVU4Hr1G057890|UniProtKB=A0A287P7E2	HORVU4Hr1G057890	Uncharacterized protein;HORVU4Hr1G057890;ortholog	GLUTATHIONE S-TRANSFERASE L2, CHLOROPLASTIC (PTHR44328:SF11)	transferase(PC00220)
9	HORVV|EnsemblGenome=HORVU5Hr1G092570|UniProtKB=A0A287S962	HORVU5Hr1G092570	MBD domain-containing protein;HORVU5Hr1G092570;ortholog	MBD DOMAIN-CONTAINING PROTEIN (PTHR33729:SF11)
	HORVV|EnsemblGenome=HORVU2Hr1G109910|UniProtKB=A0A287JER6	HORVU2Hr1G109910	Uncharacterized protein;HORVU2Hr1G109910;ortholog	PROTEIN RCC2 (PTHR46207:SF1)
	HORVV|EnsemblGenome=HORVU2Hr1G057430|UniProtKB=A0A287I2W7	HORVU2Hr1G057430	Uncharacterized protein;HORVU2Hr1G057430;ortholog	40S RIBOSOMAL PROTEIN S15-6 (PTHR11880:SF29)	ribosomal protein(PC00202)
	HORVV|EnsemblGenome=HORVU0Hr1G017330|UniProtKB=A0A287E4A9	HORVU0Hr1G017330	DNA helicase;HORVU0Hr1G017330;ortholog	DNA REPLICATION LICENSING FACTOR MCM5 (PTHR11630:SF42)	DNA metabolism protein(PC00009)
	HORVV|EnsemblGenome=HORVU6Hr1G091690|UniProtKB=A0A287V735	HORVU6Hr1G091690	Uncharacterized protein;HORVU6Hr1G091690;ortholog	T-COMPLEX PROTEIN 1 SUBUNIT ZETA (PTHR11353:SF21)	chaperonin(PC00073)
	HORVV|EnsemblGenome=HORVU2Hr1G022090|UniProtKB=A0A287HC24	HORVU2Hr1G022090	EF1_GNE domain-containing protein;HORVU2Hr1G022090;ortholog	ELONGATION FACTOR 1-BETA (PTHR11595:SF21)	translation elongation factor(PC00222)
	HORVV|EnsemblGenome=HORVU4Hr1G040660|UniProtKB=M0W5Z0	HORVU4Hr1G040660	CCT-theta;HORVU4Hr1G040660;ortholog	CCT-THETA (PTHR11353:SF19)	chaperonin(PC00073)
	HORVV|EnsemblGenome=HORVU6Hr1G025270|UniProtKB=A0A287TMC1	HORVU6Hr1G025270	T-complex protein 1 subunit eta;HORVU6Hr1G025270;ortholog	T-COMPLEX PROTEIN 1 SUBUNIT ETA (PTHR11353:SF22)	chaperonin(PC00073)
	HORVV|EnsemblGenome=HORVU7Hr1G082240|UniProtKB=F2CZL7	HORVU7Hr1G082240	Eukaryotic translation initiation factor 4C;HORVU7Hr1G082240;ortholog	EUKARYOTIC TRANSLATION INITIATION FACTOR 1A (PTHR21668:SF7)	translation initiation factor(PC00224)
	HORVV|EnsemblGenome=HORVU7Hr1G078140|UniProtKB=M0YUI3	HORVU7Hr1G078140	Uncharacterized protein;HORVU7Hr1G078140;ortholog	GLYCINE-RICH RNA-BINDING PROTEIN RZ1A (PTHR48028:SF2)
	HORVV|EnsemblGenome=HORVU2Hr1G085880|UniProtKB=A0A287IRV4	HORVU2Hr1G085880	Uncharacterized protein;HORVU2Hr1G085880;ortholog	LA PROTEIN 1-RELATED (PTHR22792:SF140)	RNA metabolism protein(PC00031)
	HORVV|EnsemblGenome=HORVU7Hr1G121390|UniProtKB=A0A287Y1E0	HORVU7Hr1G121390	HMG box domain-containing protein;HORVU7Hr1G121390;ortholog	DNA-BINDING PROTEIN MNB1B (PTHR46261:SF27)
	HORVV|EnsemblGenome=HORVU2Hr1G063210|UniProtKB=A0A287I6S8	HORVU2Hr1G063210	Eukaryotic translation initiation factor 5A;HORVU2Hr1G063210;ortholog	EUKARYOTIC TRANSLATION INITIATION FACTOR 5A (PTHR11673:SF41)	translation initiation factor(PC00224)
	HORVV|EnsemblGenome=HORVU7Hr1G011840|UniProtKB=A0A287VIJ0	HORVU7Hr1G011840	Peroxidase;HORVU7Hr1G011840;ortholog	PEROXIDASE (PTHR31235:SF222)	peroxidase(PC00180)
	HORVV|EnsemblGenome=HORVU1Hr1G088760|UniProtKB=A0A287GMW4	HORVU1Hr1G088760	Eukaryotic translation initiation factor 3 subunit D;HORVU1Hr1G088760;ortholog	EUKARYOTIC TRANSLATION INITIATION FACTOR 3 SUBUNIT D (PTHR12399:SF0)	translation initiation factor(PC00224)
	HORVV|EnsemblGenome=HORVU5Hr1G050560|UniProtKB=A0A287R691	HORVU5Hr1G050560	Polyadenylate-binding protein;HORVU5Hr1G050560;ortholog	POLYADENYLATE-BINDING PROTEIN 8 (PTHR24012:SF858)
	HORVV|EnsemblGenome=HORVU1Hr1G035130|UniProtKB=A0A287F428	HORVU1Hr1G035130	Histone H2A;HORVU1Hr1G035130;ortholog	HISTONE H2A (PTHR23430:SF351)	histone(PC00118)
	HORVV|EnsemblGenome=HORVU4Hr1G068820|UniProtKB=A0A287PIX1	HORVU4Hr1G068820	CCT-beta;HORVU4Hr1G068820;ortholog	T-COMPLEX PROTEIN 1 SUBUNIT BETA (PTHR11353:SF23)	chaperonin(PC00073)
	HORVV|EnsemblGenome=HORVU5Hr1G092610|UniProtKB=A0A287S8X8	HORVU5Hr1G092610	Uncharacterized protein;HORVU5Hr1G092610;ortholog	DNAJ-LIKE PROTEIN (PTHR43888:SF43)	chaperone(PC00072)
	HORVV|EnsemblGenome=HORVU4Hr1G040280|UniProtKB=A0A287NVB1	HORVU4Hr1G040280	Eukaryotic translation initiation factor 3 subunit I;HORVU4Hr1G040280;ortholog	EUKARYOTIC TRANSLATION INITIATION FACTOR 3 SUBUNIT I (PTHR19877:SF1)	translation initiation factor(PC00224)
	HORVV|EnsemblGenome=HORVU5Hr1G113180|UniProtKB=A0A287SS50	HORVU5Hr1G113180	Uncharacterized protein;HORVU5Hr1G113180;ortholog	SHOCK COGNATE 70 KDA PROTEIN 2, PUTATIVE, EXPRESSED-RELATED (PTHR19375:SF482)
	HORVV|EnsemblGenome=HORVU2Hr1G070000|UniProtKB=A0A287IC60	HORVU2Hr1G070000	Sm domain-containing protein;HORVU2Hr1G070000;ortholog	SM DOMAIN-CONTAINING PROTEIN (PTHR11021:SF12)	RNA splicing factor(PC00148)
	HORVV|EnsemblGenome=HORVU5Hr1G070720|UniProtKB=F2DY59	HORVU5Hr1G070720	HATPase_c domain-containing protein;HORVU5Hr1G070720;ortholog	OS09G0474300 PROTEIN (PTHR11528:SF118)	Hsp90 family chaperone(PC00028)
	HORVV|EnsemblGenome=HORVU2Hr1G020690|UniProtKB=A0A287HAK5	HORVU2Hr1G020690	Nop domain-containing protein;HORVU2Hr1G020690;ortholog	NOP DOMAIN-CONTAINING PROTEIN (PTHR10894:SF13)	RNA metabolism protein(PC00031)
	HORVV|EnsemblGenome=HORVU2Hr1G068120|UniProtKB=A0A287IB06	HORVU2Hr1G068120	Uncharacterized protein;HORVU2Hr1G068120;ortholog	OS02G0503400 PROTEIN (PTHR45722:SF26)	ribosomal protein(PC00202)
	HORVV|EnsemblGenome=HORVU7Hr1G044070|UniProtKB=A0A287WAH4	HORVU7Hr1G044070	CCT-alpha;HORVU7Hr1G044070;ortholog	CCT-ALPHA (PTHR11353:SF216)	chaperonin(PC00073)
	HORVV|EnsemblGenome=HORVU2Hr1G014580|UniProtKB=A0A287H5G8	HORVU2Hr1G014580	S1 motif domain-containing protein;HORVU2Hr1G014580;ortholog	S1 MOTIF DOMAIN-CONTAINING PROTEIN (PTHR10602:SF6)	translation initiation factor(PC00224)
	HORVV|EnsemblGenome=HORVU6Hr1G072320|UniProtKB=A0A287UMN5	HORVU6Hr1G072320	Acetolactate synthase;HORVU6Hr1G072320;ortholog	ACETOLACTATE SYNTHASE CATALYTIC SUBUNIT, MITOCHONDRIAL (PTHR18968:SF13)	ligase(PC00142)
	HORVV|EnsemblGenome=HORVU6Hr1G036810|UniProtKB=A0A287TXN8	HORVU6Hr1G036810	RRM domain-containing protein;HORVU6Hr1G036810;ortholog	RRM DOMAIN-CONTAINING PROTEIN (PTHR23147:SF172)	RNA splicing factor(PC00148)
	HORVV|EnsemblGenome=HORVU5Hr1G011460|UniProtKB=A0A287QCE8	HORVU5Hr1G011460	Uncharacterized protein;HORVU5Hr1G011460;ortholog	DEAD-BOX ATP-DEPENDENT RNA HELICASE 9 (PTHR24031:SF296)
	HORVV|EnsemblGenome=HORVU6Hr1G034650|UniProtKB=M0ZAM5	HORVU6Hr1G034650	S-adenosylmethionine synthase;HORVU6Hr1G034650;ortholog	S-ADENOSYLMETHIONINE SYNTHASE 3 (PTHR11964:SF67)	nucleotidyltransferase(PC00174)
	HORVV|EnsemblGenome=HORVU4Hr1G064230|UniProtKB=A0A287PD17	HORVU4Hr1G064230	Uncharacterized protein;HORVU4Hr1G064230;ortholog	HYDROXYPROLINE-RICH GLYCOPROTEIN FAMILY PROTEIN (PTHR31447:SF0)
	HORVV|EnsemblGenome=HORVU2Hr1G021740|UniProtKB=A0A287HB87	HORVU2Hr1G021740	BBE domain-containing protein;HORVU2Hr1G021740;ortholog
	HORVV|EnsemblGenome=HORVU5Hr1G106440|UniProtKB=F2CS01	HORVU5Hr1G106440	Eukaryotic translation initiation factor 3 subunit B;HORVU5Hr1G106440;ortholog	EUKARYOTIC TRANSLATION INITIATION FACTOR 3 SUBUNIT B (PTHR14068:SF0)	translation initiation factor(PC00224)
	HORVV|EnsemblGenome=HORVU2Hr1G042280|UniProtKB=A0A287HTW2	HORVU2Hr1G042280	NTF2 domain-containing protein;HORVU2Hr1G042280;ortholog	AT27578P (PTHR10693:SF20)	RNA metabolism protein(PC00031)
	HORVV|EnsemblGenome=HORVU2Hr1G063880|UniProtKB=M0XCF8	HORVU2Hr1G063880	Uncharacterized protein;HORVU2Hr1G063880;ortholog	OS07G0109500 PROTEIN (PTHR11545:SF19)	ribosomal protein(PC00202)
	HORVV|EnsemblGenome=HORVU2Hr1G125050|UniProtKB=M0X7M2	HORVU2Hr1G125050	Peroxidase;HORVU2Hr1G125050;ortholog	PEROXIDASE (PTHR31235:SF182)	peroxidase(PC00180)
	HORVV|EnsemblGenome=HORVU2Hr1G100970|UniProtKB=A0A287J6L1	HORVU2Hr1G100970	Uncharacterized protein;HORVU2Hr1G100970;ortholog	SUBFAMILY NOT NAMED (PTHR11524:SF33)	ribosomal protein(PC00202)
	HORVV|EnsemblGenome=HORVU5Hr1G091810|UniProtKB=A0A287S808	HORVU5Hr1G091810	Uncharacterized protein;HORVU5Hr1G091810;ortholog	31 KDA RIBONUCLEOPROTEIN, CHLOROPLASTIC-RELATED (PTHR48025:SF3)
	HORVV|EnsemblGenome=HORVU5Hr1G106380|UniProtKB=A0A287SM41	HORVU5Hr1G106380	Lysine--tRNA ligase;HORVU5Hr1G106380;ortholog	LYSINE--TRNA LIGASE (PTHR42918:SF9)	aminoacyl-tRNA synthetase(PC00047)
	HORVV|EnsemblGenome=HORVU7Hr1G033900|UniProtKB=M0UZ78	HORVU7Hr1G033900	Uncharacterized protein;HORVU7Hr1G033900;ortholog	CHAPERONIN (PTHR10772:SF52)	chaperonin(PC00073)
	HORVV|EnsemblGenome=HORVU2Hr1G073320|UniProtKB=A0A287IFP9	HORVU2Hr1G073320	Ribosomal_L18_c domain-containing protein;HORVU2Hr1G073320;ortholog	60S RIBOSOMAL PROTEIN L5 (PTHR23410:SF12)	ribosomal protein(PC00202)
	HORVV|EnsemblGenome=HORVU5Hr1G038920|UniProtKB=M0XW49	HORVU5Hr1G038920	30S ribosomal protein S4, chloroplastic;HORVU5Hr1G038920;ortholog	30S RIBOSOMAL PROTEIN S4, CHLOROPLASTIC (PTHR11831:SF43)	ribosomal protein(PC00202)
	HORVV|EnsemblGenome=HORVU1Hr1G021700|UniProtKB=A0A287EVF1	HORVU1Hr1G021700	Histidine--tRNA ligase;HORVU1Hr1G021700;ortholog	HISTIDINE--TRNA LIGASE (PTHR11476:SF7)	aminoacyl-tRNA synthetase(PC00047)
	HORVV|EnsemblGenome=HORVU6Hr1G067870|UniProtKB=A0A287UIJ6	HORVU6Hr1G067870	Uncharacterized protein;HORVU6Hr1G067870;ortholog	SUBFAMILY NOT NAMED (PTHR11661:SF35)	ribosomal protein(PC00202)
	HORVV|EnsemblGenome=HORVU7Hr1G088080|UniProtKB=A0A287X7T1	HORVU7Hr1G088080	Uncharacterized protein;HORVU7Hr1G088080;ortholog	T-COMPLEX PROTEIN 1 SUBUNIT EPSILON (PTHR11353:SF187)	chaperonin(PC00073)
	HORVV|EnsemblGenome=HORVU2Hr1G019410|UniProtKB=F2CPV3	HORVU2Hr1G019410	Predicted protein;HORVU2Hr1G019410;ortholog	SERINE/ARGININE-RICH SPLICING FACTOR SR34A (PTHR23147:SF63)	RNA splicing factor(PC00148)
	HORVV|EnsemblGenome=HORVU5Hr1G052240|UniProtKB=A0A287R7R6	HORVU5Hr1G052240	Uncharacterized protein;HORVU5Hr1G052240;ortholog	40S RIBOSOMAL PROTEIN S19 (PTHR11710:SF0)	ribosomal protein(PC00202)
	HORVV|EnsemblGenome=HORVU1Hr1G038680|UniProtKB=A0A287F6T5	HORVU1Hr1G038680	Uncharacterized protein;HORVU1Hr1G038680;ortholog	60 KDA HEAT SHOCK PROTEIN, MITOCHONDRIAL (PTHR45633:SF3)
	HORVV|EnsemblGenome=HORVU2Hr1G068360|UniProtKB=A0A287IB43	HORVU2Hr1G068360	Eukaryotic translation initiation factor 3 subunit H;HORVU2Hr1G068360;ortholog	EUKARYOTIC TRANSLATION INITIATION FACTOR 3 SUBUNIT H (PTHR10410:SF3)	translation initiation factor(PC00224)
	HORVV|EnsemblGenome=HORVU1Hr1G039260|UniProtKB=F2D7Z6	HORVU1Hr1G039260	mRNA cap-binding protein;HORVU1Hr1G039260;ortholog	EUKARYOTIC TRANSLATION INITIATION FACTOR ISOFORM 4E (PTHR11960:SF60)	translation initiation factor(PC00224)
	HORVV|EnsemblGenome=HORVU4Hr1G077250|UniProtKB=F2EJQ4	HORVU4Hr1G077250	Eukaryotic translation initiation factor 3 subunit K;HORVU4Hr1G077250;ortholog	EUKARYOTIC TRANSLATION INITIATION FACTOR 3 SUBUNIT K (PTHR13022:SF0)	translation initiation factor(PC00224)
	HORVV|EnsemblGenome=HORVU7Hr1G027430|UniProtKB=A0A287VTF7	HORVU7Hr1G027430	Ribonucleoside-diphosphate reductase;HORVU7Hr1G027430;ortholog	RIBONUCLEOSIDE-DIPHOSPHATE REDUCTASE LARGE SUBUNIT (PTHR11573:SF6)	reductase(PC00198)
	HORVV|EnsemblGenome=HORVU0Hr1G004700|UniProtKB=A0A287DVR0	HORVU0Hr1G004700	S10_plectin domain-containing protein;HORVU0Hr1G004700;ortholog	S10_PLECTIN DOMAIN-CONTAINING PROTEIN (PTHR12146:SF0)	ribosomal protein(PC00202)
	HORVV|EnsemblGenome=HORVU6Hr1G056260|UniProtKB=A0A287U924	HORVU6Hr1G056260	Nuclear cap-binding protein subunit 2;HORVU6Hr1G056260;ortholog	NUCLEAR CAP-BINDING PROTEIN SUBUNIT 2 (PTHR18847:SF0)	RNA metabolism protein(PC00031)
	HORVV|EnsemblGenome=HORVU1Hr1G049980|UniProtKB=A0A287FHY8	HORVU1Hr1G049980	AT-hook motif nuclear-localized protein;HORVU1Hr1G049980;ortholog	AT-HOOK MOTIF NUCLEAR-LOCALIZED PROTEIN 8 (PTHR31500:SF51)
	HORVV|EnsemblGenome=HORVU3Hr1G074920|UniProtKB=M0YU86	HORVU3Hr1G074920	Peroxidase;HORVU3Hr1G074920;ortholog	PEROXIDASE (PTHR31235:SF240)	peroxidase(PC00180)
	HORVV|EnsemblGenome=HORVU5Hr1G072560|UniProtKB=A0A287RRS8	HORVU5Hr1G072560	Eukaryotic translation initiation factor 3 subunit E;HORVU5Hr1G072560;ortholog	EUKARYOTIC TRANSLATION INITIATION FACTOR 3 SUBUNIT E (PTHR10317:SF0)	translation initiation factor(PC00224)
	HORVV|EnsemblGenome=HORVU5Hr1G108990|UniProtKB=M0V292	HORVU5Hr1G108990	Uncharacterized protein;HORVU5Hr1G108990;ortholog	60S RIBOSOMAL PROTEIN L7-RELATED (PTHR11524:SF16)	ribosomal protein(PC00202)
	HORVV|EnsemblGenome=HORVU2Hr1G019160|UniProtKB=A0A287H8R8	HORVU2Hr1G019160	Uncharacterized protein;HORVU2Hr1G019160;ortholog	OS07G0674200 PROTEIN (PTHR10064:SF22)	ribosomal protein(PC00202)
	HORVV|EnsemblGenome=HORVU1Hr1G018060|UniProtKB=A0A287ESC5	HORVU1Hr1G018060	RRM domain-containing protein;HORVU1Hr1G018060;ortholog	RNA-BINDING PROTEIN 8A (PTHR45894:SF1)
	HORVV|EnsemblGenome=HORVU6Hr1G058560|UniProtKB=A0A287UAX6	HORVU6Hr1G058560	Ribosomal_L14e domain-containing protein;HORVU6Hr1G058560;ortholog	60S RIBOSOMAL PROTEIN L14 (PTHR11127:SF2)	ribosomal protein(PC00202)
	HORVV|EnsemblGenome=HORVU7Hr1G039570|UniProtKB=A0A287W556	HORVU7Hr1G039570	Peroxidase;HORVU7Hr1G039570;ortholog	PEROXIDASE (PTHR31235:SF295)	peroxidase(PC00180)
	HORVV|EnsemblGenome=HORVU1Hr1G055440|UniProtKB=F2CXV3	HORVU1Hr1G055440	Nucleoside diphosphate kinase;HORVU1Hr1G055440;ortholog	NUCLEOSIDE DIPHOSPHATE KINASE (PTHR11349:SF91)	kinase(PC00137)
	HORVV|EnsemblGenome=HORVU7Hr1G030120|UniProtKB=A0A287VWE5	HORVU7Hr1G030120	Histone H2A;HORVU7Hr1G030120;ortholog	HISTONE H2A (PTHR23430:SF283)	histone(PC00118)
	HORVV|EnsemblGenome=HORVU2Hr1G031450|UniProtKB=A0A287HKY0	HORVU2Hr1G031450	EF1_GNE domain-containing protein;HORVU2Hr1G031450;ortholog	ELONGATION FACTOR 1-DELTA 1 (PTHR11595:SF81)	translation elongation factor(PC00222)
10	HORVV|EnsemblGenome=HORVU2Hr1G022090|UniProtKB=A0A287HC24	HORVU2Hr1G022090	EF1_GNE domain-containing protein;HORVU2Hr1G022090;ortholog	ELONGATION FACTOR 1-BETA (PTHR11595:SF21)	translation elongation factor(PC00222)
	HORVV|EnsemblGenome=HORVU7Hr1G082240|UniProtKB=F2CZL7	HORVU7Hr1G082240	Eukaryotic translation initiation factor 4C;HORVU7Hr1G082240;ortholog	EUKARYOTIC TRANSLATION INITIATION FACTOR 1A (PTHR21668:SF7)	translation initiation factor(PC00224)
	HORVV|EnsemblGenome=HORVU2Hr1G063210|UniProtKB=A0A287I6S8	HORVU2Hr1G063210	Eukaryotic translation initiation factor 5A;HORVU2Hr1G063210;ortholog	EUKARYOTIC TRANSLATION INITIATION FACTOR 5A (PTHR11673:SF41)	translation initiation factor(PC00224)
	HORVV|EnsemblGenome=HORVU1Hr1G088760|UniProtKB=A0A287GMW4	HORVU1Hr1G088760	Eukaryotic translation initiation factor 3 subunit D;HORVU1Hr1G088760;ortholog	EUKARYOTIC TRANSLATION INITIATION FACTOR 3 SUBUNIT D (PTHR12399:SF0)	translation initiation factor(PC00224)
	HORVV|EnsemblGenome=HORVU4Hr1G040280|UniProtKB=A0A287NVB1	HORVU4Hr1G040280	Eukaryotic translation initiation factor 3 subunit I;HORVU4Hr1G040280;ortholog	EUKARYOTIC TRANSLATION INITIATION FACTOR 3 SUBUNIT I (PTHR19877:SF1)	translation initiation factor(PC00224)
	HORVV|EnsemblGenome=HORVU2Hr1G014580|UniProtKB=A0A287H5G8	HORVU2Hr1G014580	S1 motif domain-containing protein;HORVU2Hr1G014580;ortholog	S1 MOTIF DOMAIN-CONTAINING PROTEIN (PTHR10602:SF6)	translation initiation factor(PC00224)
	HORVV|EnsemblGenome=HORVU5Hr1G106440|UniProtKB=F2CS01	HORVU5Hr1G106440	Eukaryotic translation initiation factor 3 subunit B;HORVU5Hr1G106440;ortholog	EUKARYOTIC TRANSLATION INITIATION FACTOR 3 SUBUNIT B (PTHR14068:SF0)	translation initiation factor(PC00224)
	HORVV|EnsemblGenome=HORVU2Hr1G068360|UniProtKB=A0A287IB43	HORVU2Hr1G068360	Eukaryotic translation initiation factor 3 subunit H;HORVU2Hr1G068360;ortholog	EUKARYOTIC TRANSLATION INITIATION FACTOR 3 SUBUNIT H (PTHR10410:SF3)	translation initiation factor(PC00224)
	HORVV|EnsemblGenome=HORVU1Hr1G039260|UniProtKB=F2D7Z6	HORVU1Hr1G039260	mRNA cap-binding protein;HORVU1Hr1G039260;ortholog	EUKARYOTIC TRANSLATION INITIATION FACTOR ISOFORM 4E (PTHR11960:SF60)	translation initiation factor(PC00224)
	HORVV|EnsemblGenome=HORVU4Hr1G077250|UniProtKB=F2EJQ4	HORVU4Hr1G077250	Eukaryotic translation initiation factor 3 subunit K;HORVU4Hr1G077250;ortholog	EUKARYOTIC TRANSLATION INITIATION FACTOR 3 SUBUNIT K (PTHR13022:SF0)	translation initiation factor(PC00224)
	HORVV|EnsemblGenome=HORVU5Hr1G072560|UniProtKB=A0A287RRS8	HORVU5Hr1G072560	Eukaryotic translation initiation factor 3 subunit E;HORVU5Hr1G072560;ortholog	EUKARYOTIC TRANSLATION INITIATION FACTOR 3 SUBUNIT E (PTHR10317:SF0)	translation initiation factor(PC00224)
	HORVV|EnsemblGenome=HORVU2Hr1G031450|UniProtKB=A0A287HKY0	HORVU2Hr1G031450	EF1_GNE domain-containing protein;HORVU2Hr1G031450;ortholog	ELONGATION FACTOR 1-DELTA 1 (PTHR11595:SF81)	translation elongation factor(PC00222)
11	HORVV|EnsemblGenome=HORVU6Hr1G091690|UniProtKB=A0A287V735	HORVU6Hr1G091690	Uncharacterized protein;HORVU6Hr1G091690;ortholog	T-COMPLEX PROTEIN 1 SUBUNIT ZETA (PTHR11353:SF21)	chaperonin(PC00073)
	HORVV|EnsemblGenome=HORVU4Hr1G040660|UniProtKB=M0W5Z0	HORVU4Hr1G040660	CCT-theta;HORVU4Hr1G040660;ortholog	CCT-THETA (PTHR11353:SF19)	chaperonin(PC00073)
	HORVV|EnsemblGenome=HORVU6Hr1G025270|UniProtKB=A0A287TMC1	HORVU6Hr1G025270	T-complex protein 1 subunit eta;HORVU6Hr1G025270;ortholog	T-COMPLEX PROTEIN 1 SUBUNIT ETA (PTHR11353:SF22)	chaperonin(PC00073)
	HORVV|EnsemblGenome=HORVU7Hr1G038520|UniProtKB=M0WMV2	HORVU7Hr1G038520	CS domain-containing protein;HORVU7Hr1G038520;ortholog	NUCLEAR MIGRATION PROTEIN NUDC (PTHR12356:SF3)	microtubule or microtubule-binding cytoskeletal protein(PC00157)
	HORVV|EnsemblGenome=HORVU1Hr1G057970|UniProtKB=M0YAP1	HORVU1Hr1G057970	NAC-A/B domain-containing protein;HORVU1Hr1G057970;ortholog	NASCENT POLYPEPTIDE-ASSOCIATED COMPLEX SUBUNIT ALPHA-LIKE PROTEIN 1 (PTHR21713:SF36)	basic helix-loop-helix transcription factor(PC00055)
	HORVV|EnsemblGenome=HORVU1Hr1G035130|UniProtKB=A0A287F428	HORVU1Hr1G035130	Histone H2A;HORVU1Hr1G035130;ortholog	HISTONE H2A (PTHR23430:SF351)	histone(PC00118)
	HORVV|EnsemblGenome=HORVU4Hr1G068820|UniProtKB=A0A287PIX1	HORVU4Hr1G068820	CCT-beta;HORVU4Hr1G068820;ortholog	T-COMPLEX PROTEIN 1 SUBUNIT BETA (PTHR11353:SF23)	chaperonin(PC00073)
	HORVV|EnsemblGenome=HORVU5Hr1G092610|UniProtKB=A0A287S8X8	HORVU5Hr1G092610	Uncharacterized protein;HORVU5Hr1G092610;ortholog	DNAJ-LIKE PROTEIN (PTHR43888:SF43)	chaperone(PC00072)
	HORVV|EnsemblGenome=HORVU5Hr1G113180|UniProtKB=A0A287SS50	HORVU5Hr1G113180	Uncharacterized protein;HORVU5Hr1G113180;ortholog	SHOCK COGNATE 70 KDA PROTEIN 2, PUTATIVE, EXPRESSED-RELATED (PTHR19375:SF482)
	HORVV|EnsemblGenome=HORVU5Hr1G070720|UniProtKB=F2DY59	HORVU5Hr1G070720	HATPase_c domain-containing protein;HORVU5Hr1G070720;ortholog	OS09G0474300 PROTEIN (PTHR11528:SF118)	Hsp90 family chaperone(PC00028)
	HORVV|EnsemblGenome=HORVU7Hr1G044070|UniProtKB=A0A287WAH4	HORVU7Hr1G044070	CCT-alpha;HORVU7Hr1G044070;ortholog	CCT-ALPHA (PTHR11353:SF216)	chaperonin(PC00073)
	HORVV|EnsemblGenome=HORVU1Hr1G083710|UniProtKB=A0A287GIZ9	HORVU1Hr1G083710	WD_REPEATS_REGION domain-containing protein;HORVU1Hr1G083710;ortholog	RECEPTOR OF ACTIVATED PROTEIN C KINASE 1 (PTHR19868:SF0)
	HORVV|EnsemblGenome=HORVU5Hr1G106440|UniProtKB=F2CS01	HORVU5Hr1G106440	Eukaryotic translation initiation factor 3 subunit B;HORVU5Hr1G106440;ortholog	EUKARYOTIC TRANSLATION INITIATION FACTOR 3 SUBUNIT B (PTHR14068:SF0)	translation initiation factor(PC00224)
	HORVV|EnsemblGenome=HORVU1Hr1G020390|UniProtKB=A0A287EU86	HORVU1Hr1G020390	CULLIN_2 domain-containing protein;HORVU1Hr1G020390;ortholog	CULLIN_2 DOMAIN-CONTAINING PROTEIN (PTHR11932:SF143)	ubiquitin-protein ligase(PC00234)
	HORVV|EnsemblGenome=HORVU2Hr1G025930|UniProtKB=A0A287HFV4	HORVU2Hr1G025930	Uncharacterized protein;HORVU2Hr1G025930;ortholog	OS07G0641700 PROTEIN (PTHR10772:SF39)	chaperonin(PC00073)
	HORVV|EnsemblGenome=HORVU7Hr1G033900|UniProtKB=M0UZ78	HORVU7Hr1G033900	Uncharacterized protein;HORVU7Hr1G033900;ortholog	CHAPERONIN (PTHR10772:SF52)	chaperonin(PC00073)
	HORVV|EnsemblGenome=HORVU7Hr1G088080|UniProtKB=A0A287X7T1	HORVU7Hr1G088080	Uncharacterized protein;HORVU7Hr1G088080;ortholog	T-COMPLEX PROTEIN 1 SUBUNIT EPSILON (PTHR11353:SF187)	chaperonin(PC00073)
	HORVV|EnsemblGenome=HORVU7Hr1G069460|UniProtKB=A0A287WSE7	HORVU7Hr1G069460	CS domain-containing protein;HORVU7Hr1G069460;ortholog	CO-CHAPERONE PROTEIN DAF-41 (PTHR22932:SF1)	chaperone(PC00072)
	HORVV|EnsemblGenome=HORVU6Hr1G051930|UniProtKB=A0A287U5M5	HORVU6Hr1G051930	Uncharacterized protein;HORVU6Hr1G051930;ortholog	PROTEIN SET (PTHR11875:SF49)	chromatin/chromatin-binding, or -regulatory protein(PC00077)
	HORVV|EnsemblGenome=HORVU7Hr1G030120|UniProtKB=A0A287VWE5	HORVU7Hr1G030120	Histone H2A;HORVU7Hr1G030120;ortholog	HISTONE H2A (PTHR23430:SF283)	histone(PC00118)
12	HORVV|EnsemblGenome=HORVU2Hr1G022090|UniProtKB=A0A287HC24	HORVU2Hr1G022090	EF1_GNE domain-containing protein;HORVU2Hr1G022090;ortholog	ELONGATION FACTOR 1-BETA (PTHR11595:SF21)	translation elongation factor(PC00222)
	HORVV|EnsemblGenome=HORVU2Hr1G063210|UniProtKB=A0A287I6S8	HORVU2Hr1G063210	Eukaryotic translation initiation factor 5A;HORVU2Hr1G063210;ortholog	EUKARYOTIC TRANSLATION INITIATION FACTOR 5A (PTHR11673:SF41)	translation initiation factor(PC00224)
	HORVV|EnsemblGenome=HORVU2Hr1G031450|UniProtKB=A0A287HKY0	HORVU2Hr1G031450	EF1_GNE domain-containing protein;HORVU2Hr1G031450;ortholog	ELONGATION FACTOR 1-DELTA 1 (PTHR11595:SF81)	translation elongation factor(PC00222)
13	HORVV|EnsemblGenome=HORVU2Hr1G063210|UniProtKB=A0A287I6S8	HORVU2Hr1G063210	Eukaryotic translation initiation factor 5A;HORVU2Hr1G063210;ortholog	EUKARYOTIC TRANSLATION INITIATION FACTOR 5A (PTHR11673:SF41)	translation initiation factor(PC00224)
	HORVV|EnsemblGenome=HORVU2Hr1G014580|UniProtKB=A0A287H5G8	HORVU2Hr1G014580	S1 motif domain-containing protein;HORVU2Hr1G014580;ortholog	S1 MOTIF DOMAIN-CONTAINING PROTEIN (PTHR10602:SF6)	translation initiation factor(PC00224)
	HORVV|EnsemblGenome=HORVU1Hr1G083710|UniProtKB=A0A287GIZ9	HORVU1Hr1G083710	WD_REPEATS_REGION domain-containing protein;HORVU1Hr1G083710;ortholog	RECEPTOR OF ACTIVATED PROTEIN C KINASE 1 (PTHR19868:SF0)
	HORVV|EnsemblGenome=HORVU4Hr1G077250|UniProtKB=F2EJQ4	HORVU4Hr1G077250	Eukaryotic translation initiation factor 3 subunit K;HORVU4Hr1G077250;ortholog	EUKARYOTIC TRANSLATION INITIATION FACTOR 3 SUBUNIT K (PTHR13022:SF0)	translation initiation factor(PC00224)
14	HORVV|EnsemblGenome=HORVU2Hr1G022090|UniProtKB=A0A287HC24	HORVU2Hr1G022090	EF1_GNE domain-containing protein;HORVU2Hr1G022090;ortholog	ELONGATION FACTOR 1-BETA (PTHR11595:SF21)	translation elongation factor(PC00222)
	HORVV|EnsemblGenome=HORVU1Hr1G059860|UniProtKB=M0YM00	HORVU1Hr1G059860	RanBD1 domain-containing protein;HORVU1Hr1G059860;ortholog	NUCLEAR PORE COMPLEX PROTEIN NUP50A-RELATED (PTHR23138:SF142)	scaffold/adaptor protein(PC00226)
	HORVV|EnsemblGenome=HORVU1Hr1G059970|UniProtKB=M0ZCE0	HORVU1Hr1G059970	RanBD1 domain-containing protein;HORVU1Hr1G059970;ortholog	E3 SUMO-PROTEIN LIGASE RANBP2-RELATED (PTHR23138:SF87)	scaffold/adaptor protein(PC00226)
	HORVV|EnsemblGenome=HORVU2Hr1G031450|UniProtKB=A0A287HKY0	HORVU2Hr1G031450	EF1_GNE domain-containing protein;HORVU2Hr1G031450;ortholog	ELONGATION FACTOR 1-DELTA 1 (PTHR11595:SF81)	translation elongation factor(PC00222)
15	HORVV|EnsemblGenome=HORVU2Hr1G057430|UniProtKB=A0A287I2W7	HORVU2Hr1G057430	Uncharacterized protein;HORVU2Hr1G057430;ortholog	40S RIBOSOMAL PROTEIN S15-6 (PTHR11880:SF29)	ribosomal protein(PC00202)
	HORVV|EnsemblGenome=HORVU2Hr1G053290|UniProtKB=A0A287I0Z1	HORVU2Hr1G053290	40S ribosomal protein S12;HORVU2Hr1G053290;ortholog	40S RIBOSOMAL PROTEIN S12 (PTHR11843:SF0)	ribosomal protein(PC00202)
	HORVV|EnsemblGenome=HORVU2Hr1G068120|UniProtKB=A0A287IB06	HORVU2Hr1G068120	Uncharacterized protein;HORVU2Hr1G068120;ortholog	OS02G0503400 PROTEIN (PTHR45722:SF26)	ribosomal protein(PC00202)
	HORVV|EnsemblGenome=HORVU1Hr1G029870|UniProtKB=F2EG94	HORVU1Hr1G029870	40S ribosomal protein S7;HORVU1Hr1G029870;ortholog	40S RIBOSOMAL PROTEIN S7 (PTHR11278:SF22)	ribosomal protein(PC00202)
	HORVV|EnsemblGenome=HORVU4Hr1G070370|UniProtKB=A0A287PJU2	HORVU4Hr1G070370	40S ribosomal protein S3a;HORVU4Hr1G070370;ortholog	40S RIBOSOMAL PROTEIN S3A (PTHR11830:SF23)	ribosomal protein(PC00202)
	HORVV|EnsemblGenome=HORVU2Hr1G063880|UniProtKB=M0XCF8	HORVU2Hr1G063880	Uncharacterized protein;HORVU2Hr1G063880;ortholog	OS07G0109500 PROTEIN (PTHR11545:SF19)	ribosomal protein(PC00202)
	HORVV|EnsemblGenome=HORVU2Hr1G100970|UniProtKB=A0A287J6L1	HORVU2Hr1G100970	Uncharacterized protein;HORVU2Hr1G100970;ortholog	SUBFAMILY NOT NAMED (PTHR11524:SF33)	ribosomal protein(PC00202)
	HORVV|EnsemblGenome=HORVU1Hr1G042220|UniProtKB=A0A287FAD4	HORVU1Hr1G042220	Uncharacterized protein;HORVU1Hr1G042220;ortholog	40S RIBOSOMAL PROTEIN S17 (PTHR10732:SF0)	ribosomal protein(PC00202)
	HORVV|EnsemblGenome=HORVU2Hr1G073320|UniProtKB=A0A287IFP9	HORVU2Hr1G073320	Ribosomal_L18_c domain-containing protein;HORVU2Hr1G073320;ortholog	60S RIBOSOMAL PROTEIN L5 (PTHR23410:SF12)	ribosomal protein(PC00202)
	HORVV|EnsemblGenome=HORVU5Hr1G038920|UniProtKB=M0XW49	HORVU5Hr1G038920	30S ribosomal protein S4, chloroplastic;HORVU5Hr1G038920;ortholog	30S RIBOSOMAL PROTEIN S4, CHLOROPLASTIC (PTHR11831:SF43)	ribosomal protein(PC00202)
	HORVV|EnsemblGenome=HORVU5Hr1G103330|UniProtKB=A0A287SIW7	HORVU5Hr1G103330	40S ribosomal protein S12;HORVU5Hr1G103330;ortholog	40S RIBOSOMAL PROTEIN S12 (PTHR11843:SF20)	ribosomal protein(PC00202)
	HORVV|EnsemblGenome=HORVU6Hr1G067870|UniProtKB=A0A287UIJ6	HORVU6Hr1G067870	Uncharacterized protein;HORVU6Hr1G067870;ortholog	SUBFAMILY NOT NAMED (PTHR11661:SF35)	ribosomal protein(PC00202)
	HORVV|EnsemblGenome=HORVU5Hr1G052240|UniProtKB=A0A287R7R6	HORVU5Hr1G052240	Uncharacterized protein;HORVU5Hr1G052240;ortholog	40S RIBOSOMAL PROTEIN S19 (PTHR11710:SF0)	ribosomal protein(PC00202)
	HORVV|EnsemblGenome=HORVU2Hr1G086390|UniProtKB=A0A287ISH2	HORVU2Hr1G086390	Ribosomal_L23eN domain-containing protein;HORVU2Hr1G086390;ortholog	OS04G0501000 PROTEIN (PTHR11620:SF77)	ribosomal protein(PC00202)
	HORVV|EnsemblGenome=HORVU0Hr1G004700|UniProtKB=A0A287DVR0	HORVU0Hr1G004700	S10_plectin domain-containing protein;HORVU0Hr1G004700;ortholog	S10_PLECTIN DOMAIN-CONTAINING PROTEIN (PTHR12146:SF0)	ribosomal protein(PC00202)
	HORVV|EnsemblGenome=HORVU0Hr1G004480|UniProtKB=A0A287DVN8	HORVU0Hr1G004480	Uncharacterized protein;HORVU0Hr1G004480;ortholog	60S ACIDIC RIBOSOMAL PROTEIN P2A (PTHR21141:SF100)	ribosomal protein(PC00202)
	HORVV|EnsemblGenome=HORVU7Hr1G054010|UniProtKB=A0A287WJA5	HORVU7Hr1G054010	Uncharacterized protein;HORVU7Hr1G054010;ortholog	SUBFAMILY NOT NAMED (PTHR11593:SF22)	ribosomal protein(PC00202)
	HORVV|EnsemblGenome=HORVU5Hr1G108990|UniProtKB=M0V292	HORVU5Hr1G108990	Uncharacterized protein;HORVU5Hr1G108990;ortholog	60S RIBOSOMAL PROTEIN L7-RELATED (PTHR11524:SF16)	ribosomal protein(PC00202)
	HORVV|EnsemblGenome=HORVU2Hr1G019160|UniProtKB=A0A287H8R8	HORVU2Hr1G019160	Uncharacterized protein;HORVU2Hr1G019160;ortholog	OS07G0674200 PROTEIN (PTHR10064:SF22)	ribosomal protein(PC00202)
	HORVV|EnsemblGenome=HORVU6Hr1G058560|UniProtKB=A0A287UAX6	HORVU6Hr1G058560	Ribosomal_L14e domain-containing protein;HORVU6Hr1G058560;ortholog	60S RIBOSOMAL PROTEIN L14 (PTHR11127:SF2)	ribosomal protein(PC00202)
16	HORVV|EnsemblGenome=HORVU1Hr1G088760|UniProtKB=A0A287GMW4	HORVU1Hr1G088760	Eukaryotic translation initiation factor 3 subunit D;HORVU1Hr1G088760;ortholog	EUKARYOTIC TRANSLATION INITIATION FACTOR 3 SUBUNIT D (PTHR12399:SF0)	translation initiation factor(PC00224)
	HORVV|EnsemblGenome=HORVU5Hr1G050560|UniProtKB=A0A287R691	HORVU5Hr1G050560	Polyadenylate-binding protein;HORVU5Hr1G050560;ortholog	POLYADENYLATE-BINDING PROTEIN 8 (PTHR24012:SF858)
	HORVV|EnsemblGenome=HORVU2Hr1G068120|UniProtKB=A0A287IB06	HORVU2Hr1G068120	Uncharacterized protein;HORVU2Hr1G068120;ortholog	OS02G0503400 PROTEIN (PTHR45722:SF26)	ribosomal protein(PC00202)
	HORVV|EnsemblGenome=HORVU4Hr1G064230|UniProtKB=A0A287PD17	HORVU4Hr1G064230	Uncharacterized protein;HORVU4Hr1G064230;ortholog	HYDROXYPROLINE-RICH GLYCOPROTEIN FAMILY PROTEIN (PTHR31447:SF0)
	HORVV|EnsemblGenome=HORVU2Hr1G042280|UniProtKB=A0A287HTW2	HORVU2Hr1G042280	NTF2 domain-containing protein;HORVU2Hr1G042280;ortholog	AT27578P (PTHR10693:SF20)	RNA metabolism protein(PC00031)
	HORVV|EnsemblGenome=HORVU2Hr1G063880|UniProtKB=M0XCF8	HORVU2Hr1G063880	Uncharacterized protein;HORVU2Hr1G063880;ortholog	OS07G0109500 PROTEIN (PTHR11545:SF19)	ribosomal protein(PC00202)
	HORVV|EnsemblGenome=HORVU5Hr1G091810|UniProtKB=A0A287S808	HORVU5Hr1G091810	Uncharacterized protein;HORVU5Hr1G091810;ortholog	31 KDA RIBONUCLEOPROTEIN, CHLOROPLASTIC-RELATED (PTHR48025:SF3)
	HORVV|EnsemblGenome=HORVU2Hr1G068360|UniProtKB=A0A287IB43	HORVU2Hr1G068360	Eukaryotic translation initiation factor 3 subunit H;HORVU2Hr1G068360;ortholog	EUKARYOTIC TRANSLATION INITIATION FACTOR 3 SUBUNIT H (PTHR10410:SF3)	translation initiation factor(PC00224)
	HORVV|EnsemblGenome=HORVU1Hr1G018060|UniProtKB=A0A287ESC5	HORVU1Hr1G018060	RRM domain-containing protein;HORVU1Hr1G018060;ortholog	RNA-BINDING PROTEIN 8A (PTHR45894:SF1)
