# Supplementary material for: Membrane-Enriched Proteomics Link Ribosome Accumulation and Proteome Reprogramming With Cold Acclimation in Barley Root Meristems
Source: Front Plant Sci. 2021 Apr 30;12:656683. doi: 10.3389/fpls.2021.656683 (PMC8121087; doi:10.3389/fpls.2021.656683)
Supplement: Supplementary file 7 [file Table_7.XLSX]

## Sheet: S7A
Supplementary Table 7A. General status of translation-related proteins in barley roots during experimental treatments of sustained cold stratification / acclimation and mimic biotic stress. Related to Figure 6; Table 2. Barley protein matches were aligned to the whole Arabidopsis reviewed proteome (SwissProt - UniProt) and the maximum match score was used as the putative identity of the protein a…	Paralog	ATG	match	max_scores	Proteins identified	Peptide uniqueness	HORVU ID	Chromosme location	HC_G	General name	GO terms	PF ID	IPR ID	Cluster_Rows_Kmeans_.5k.	Cluster_Rows_AU_99.	X.Intercept.	Factor1tip	Factor2chitin	Factor2chitosan	Factor2cold	Factor1tip.Factor2chitin	Factor1tip.Factor2chitosan	Factor1tip.Factor2cold	X.Intercept..1	Factor1tip.1	Factor2chitin.1	Factor2chitosan.1	Factor2cold.1	Factor1tip.Factor2chitin.1	Factor1tip.Factor2chitosan.1	Factor1tip.Factor2cold.1	Gini_Root_Zone	VIP_oplsda_Root_zone	Gini_Treatment_Only_Cold	VIP_plsda_Treatment	Order of Table
	EF1A2	AT1G07930	sp|Q8W4H7|EF1A2_ARATH Elongation factor 1-alpha 2 OS=Arabidopsis thaliana OX=3702 GN=A2 PE=1 SV=2	1729.84	HORVU4Hr1G056740.5;HORVU5Hr1G100200.3;HORVU5Hr1G100700.3;HORVU4Hr1G056830.1;HORVU6Hr1G085370.2;HORVU6Hr1G085320.3	1	HORVU4Hr1G056740.5 HORVU4Hr1G056740	chr4H:476594220-476596820	HC_G	Elongation factor 1-alpha	GO:0003746, GO:0003924, GO:0005525, GO:0005737, GO:0006414	PF00009, PF03143, PF03144	IPR000795, IPR004160, IPR004161, IPR004539, IPR009000, IPR009001, IPR027417, IPR031157	3	NA	3.02592e-15	0.00743334	0.915252	0.553886	0.991684	0.615574	0.777293	0.262277	3.72282e-15	0.0526052	0.999981	0.934457	0.99697	0.987073	0.999388	0.582734	0	1.47743	0	0.473428	247
	EF1A2	AT1G07930	sp|Q8W4H7|EF1A2_ARATH Elongation factor 1-alpha 2 OS=Arabidopsis thaliana OX=3702 GN=A2 PE=1 SV=2	1697.78	HORVU0Hr1G017020.1;HORVU2Hr1G013680.1	1	HORVU0Hr1G017020.1 HORVU0Hr1G017020	chrUn:91412363-91415524	HC_G	Elongation factor 1-alpha	GO:0003746, GO:0003924, GO:0005525, GO:0005737, GO:0006414	PF00009, PF03143, PF03144	IPR000795, IPR004160, IPR004161, IPR004539, IPR009000, IPR009001, IPR027417, IPR031157	3	X1872	1.32763e-15	0.0309691	0.65455	0.787521	0.500471	0.805529	0.838702	0.33443	1.70167e-15	0.135584	0.999981	0.980589	0.691803	0.987073	0.999388	0.641486	0	0.385464	0	0.723007	182
	EF1A2	AT1G07930	sp|Q8W4H7|EF1A2_ARATH Elongation factor 1-alpha 2 OS=Arabidopsis thaliana OX=3702 GN=A2 PE=1 SV=2	1697.78	HORVU0Hr1G017020.1;HORVU2Hr1G013680.1	2	HORVU2Hr1G013680.1 HORVU2Hr1G013680	chr2H:29621821-29625136	HC_G	Elongation factor 1-alpha	GO:0003746, GO:0003924, GO:0005525, GO:0005737, GO:0006414	PF00009, PF03143, PF03144	IPR000795, IPR004160, IPR004161, IPR004539, IPR009000, IPR009001, IPR027417, IPR031157	3	X1872	1.32763e-15	0.0309691	0.65455	0.787521	0.500471	0.805529	0.838702	0.33443	1.70167e-15	0.135584	0.999981	0.980589	0.691803	0.987073	0.999388	0.641486	0	0.385464	0	0.723007	182
	EFGM2	AT2G45030	sp|F4IW10|EFGM2_ARATH Elongation factor G-2, mitochondrial OS=Arabidopsis thaliana OX=3702 GN=MEFG2 PE=1 SV=1	1692.38	HORVU7Hr1G082910.2	1	HORVU7Hr1G082910.2 HORVU7Hr1G082910	chr7H:498793193-498812988	HC_G	Elongation factor G 1	GO:0003746, GO:0003924, GO:0005525, GO:0005622, GO:0006414	PF00009, PF00679, PF03144, PF03764, PF14492	IPR000640, IPR000795, IPR004161, IPR004540, IPR005225, IPR005517, IPR009000, IPR009022, IPR014721, IPR020568, IPR027417, IPR031157	3	NA	2.10088e-15	0.00821832	0.721367	0.508672	0.438863	0.816995	0.665917	0.530856	2.629e-15	0.0560833	0.999981	0.913366	0.645815	0.987073	0.999388	0.769658	0	0.203587	0	1.16371	301
	EF1A2	AT1G07930	sp|Q8W4H7|EF1A2_ARATH Elongation factor 1-alpha 2 OS=Arabidopsis thaliana OX=3702 GN=A2 PE=1 SV=2	1651.84	HORVU4Hr1G056740.5;HORVU5Hr1G100200.3;HORVU5Hr1G100700.3;HORVU4Hr1G056830.1;HORVU6Hr1G085370.2;HORVU6Hr1G085320.3	2	HORVU5Hr1G100200.3 HORVU5Hr1G100200	chr5H:611298406-611301181	HC_G	Elongation factor 1-alpha	GO:0003746, GO:0003924, GO:0005525, GO:0005737, GO:0006414	PF00009, PF03143, PF03144	IPR000795, IPR004160, IPR004161, IPR004539, IPR009000, IPR009001, IPR027417, IPR031157	3	NA	3.02592e-15	0.00743334	0.915252	0.553886	0.991684	0.615574	0.777293	0.262277	3.72282e-15	0.0526052	0.999981	0.934457	0.99697	0.987073	0.999388	0.582734	0	1.47743	0	0.473428	247
	EF1A2	AT1G07930	sp|Q8W4H7|EF1A2_ARATH Elongation factor 1-alpha 2 OS=Arabidopsis thaliana OX=3702 GN=A2 PE=1 SV=2	1647.84	HORVU4Hr1G056740.5;HORVU5Hr1G100200.3;HORVU5Hr1G100700.3;HORVU4Hr1G056830.1;HORVU6Hr1G085370.2;HORVU6Hr1G085320.3	3	HORVU5Hr1G100700.3 HORVU5Hr1G100700	chr5H:611821185-611824186	HC_G	Elongation factor 1-alpha	GO:0003746, GO:0003924, GO:0005525, GO:0005737, GO:0006414	PF00009, PF03143, PF03144	IPR000795, IPR004160, IPR004161, IPR004539, IPR009000, IPR009001, IPR027417, IPR031157	3	NA	3.02592e-15	0.00743334	0.915252	0.553886	0.991684	0.615574	0.777293	0.262277	3.72282e-15	0.0526052	0.999981	0.934457	0.99697	0.987073	0.999388	0.582734	0	1.47743	0	0.473428	247
	EF1A2	AT1G07930	sp|Q8W4H7|EF1A2_ARATH Elongation factor 1-alpha 2 OS=Arabidopsis thaliana OX=3702 GN=A2 PE=1 SV=2	1402.02	HORVU4Hr1G056740.5;HORVU5Hr1G100200.3;HORVU5Hr1G100700.3;HORVU4Hr1G056830.1;HORVU6Hr1G085370.2;HORVU6Hr1G085320.3	5	HORVU6Hr1G085370.2 HORVU6Hr1G085370	chr6H:558394508-558396897	HC_G	Elongation factor 1-alpha	GO:0003746, GO:0003924, GO:0005525, GO:0005737, GO:0006414	PF00009, PF03143, PF03144	IPR000795, IPR004160, IPR004161, IPR004539, IPR009000, IPR009001, IPR027417, IPR031157	3	NA	3.02592e-15	0.00743334	0.915252	0.553886	0.991684	0.615574	0.777293	0.262277	3.72282e-15	0.0526052	0.999981	0.934457	0.99697	0.987073	0.999388	0.582734	0	1.47743	0	0.473428	247
	EF1A2	AT1G07930	sp|Q8W4H7|EF1A2_ARATH Elongation factor 1-alpha 2 OS=Arabidopsis thaliana OX=3702 GN=A2 PE=1 SV=2	1402.02	HORVU4Hr1G056740.5;HORVU5Hr1G100200.3;HORVU5Hr1G100700.3;HORVU4Hr1G056830.1;HORVU6Hr1G085370.2;HORVU6Hr1G085320.3	6	HORVU6Hr1G085320.3 HORVU6Hr1G085320	chr6H:558259944-558261822	HC_G	Elongation factor 1-alpha	GO:0003746, GO:0003924, GO:0005525, GO:0005737, GO:0006414	PF00009, PF03143, PF03144	IPR000795, IPR004160, IPR004161, IPR004539, IPR009000, IPR009001, IPR027417, IPR031157	3	NA	3.02592e-15	0.00743334	0.915252	0.553886	0.991684	0.615574	0.777293	0.262277	3.72282e-15	0.0526052	0.999981	0.934457	0.99697	0.987073	0.999388	0.582734	0	1.47743	0	0.473428	247
	ERF1Z	AT3G26618	sp|P35614|ERF1Z_ARATH Eukaryotic peptide chain release factor subunit 1-3 OS=Arabidopsis thaliana OX=3702 GN=ERF1-3 PE=1 SV=1	1356.35	HORVU4Hr1G006500.2	1	HORVU4Hr1G006500.2 HORVU4Hr1G006500	chr4H:15277573-15279046	HC_G	Eukaryotic peptide chain release factor subunit 1-3	GO:0005737, GO:0006415, GO:0016149	PF03463, PF03464, PF03465	IPR004403, IPR005140, IPR005141, IPR005142, IPR024049, IPR029064	3	NA	5.8462e-17	0.11142	0.792541	0.329511	0.550868	0.624153	0.743925	0.110948	9.26737e-17	0.285033	0.999981	0.856834	0.729401	0.987073	0.999388	0.453427	0	1.39242	0	0.519293	271
	ERF1Z	AT3G26618	sp|P35614|ERF1Z_ARATH Eukaryotic peptide chain release factor subunit 1-3 OS=Arabidopsis thaliana OX=3702 GN=ERF1-3 PE=1 SV=1	1293.74	HORVU2Hr1G035400.1	1	HORVU2Hr1G035400.1 HORVU2Hr1G035400	chr2H:149783056-149787027	HC_G	Eukaryotic peptide chain release factor subunit 1-3	GO:0005737, GO:0006415, GO:0016149	PF03463, PF03464, PF03465	IPR004403, IPR005140, IPR005141, IPR005142, IPR024049, IPR029064	5	NA	3.42734e-18	0.0706694	0.669493	0.996409	0.235843	0.729312	0.790441	0.886588	8.04287e-18	0.216988	0.999981	0.997681	0.479798	0.987073	0.999388	0.950506	0	0.0288654	0	1.25818	1630
	tRNA-K	AT1G69410	sp|F4I116|SYLC_ARATH Leucine--tRNA ligase, cytoplasmic OS=Arabidopsis thaliana OX=3702 GN=At1g09620 PE=1 SV=1	1281.82	HORVU3Hr1G032730.1	1	HORVU3Hr1G032730.1 HORVU3Hr1G032730	chr3H:169948045-169953829	HC_G	Leucine--tRNA ligase	GO:0000166, GO:0002161, GO:0004812, GO:0004823, GO:0005524, GO:0005737, GO:0006418, GO:0006429	PF00133, PF08264	IPR001412, IPR002300, IPR004493, IPR009008, IPR009080, IPR013155, IPR014729	5	X281	1.39026e-17	0.0690093	0.789988	0.740451	0.434452	0.401846	0.821982	0.106222	2.60242e-17	0.213677	0.999981	0.968725	0.642798	0.987073	0.999388	0.447213	0	1.24262	0	0.802927	1399
	tRNA-M	AT1G69410	sp|Q9SVN5|SYMC_ARATH Methionine--tRNA ligase, cytoplasmic OS=Arabidopsis thaliana OX=3702 GN=At4g13780 PE=2 SV=1	1224.73	HORVU0Hr1G011560.1;HORVU5Hr1G018330.2	2	HORVU5Hr1G018330.2 HORVU5Hr1G018330	chr5H:74251771-74258147	HC_G	Methionine--tRNA ligase	GO:0000049, GO:0000166, GO:0004812, GO:0004825, GO:0005524, GO:0005737, GO:0006418, GO:0006431	PF01588, PF09334	IPR001412, IPR002547, IPR009080, IPR012340, IPR014729, IPR014758, IPR015413, IPR023458, IPR029038	5	NA	1.06444e-18	0.0735112	0.775152	0.983558	0.570531	0.600095	0.99294	0.556833	3.18227e-18	0.222143	0.999981	0.996789	0.739502	0.987073	0.999399	0.785553	0	0.800762	0	0.776164	1401
	tRNA-L	AT1G69410	sp|F4I116|SYLC_ARATH Leucine--tRNA ligase, cytoplasmic OS=Arabidopsis thaliana OX=3702 GN=At1g09620 PE=1 SV=1	1209.81	HORVU2Hr1G026750.9	1	HORVU2Hr1G026750.9 HORVU2Hr1G026750	chr2H:86120914-86124405	HC_G	Leucine--tRNA ligase	GO:0000166, GO:0002161, GO:0004812, GO:0004823, GO:0005524, GO:0005737, GO:0006418, GO:0006429	PF00133, PF08264	IPR001412, IPR002300, IPR004493, IPR009008, IPR009080, IPR013155, IPR014729	5	NA	7.1079e-20	0.0249018	0.992344	0.699331	0.743632	0.584335	0.808216	0.334865	4.81091e-19	0.119183	0.999981	0.968725	0.857055	0.987073	0.999388	0.641825	0	1.32765	0	1.2337	1382
	tRNA-M	AT1G69410	sp|Q9SVN5|SYMC_ARATH Methionine--tRNA ligase, cytoplasmic OS=Arabidopsis thaliana OX=3702 GN=At4g13780 PE=2 SV=1	1056.16	HORVU0Hr1G011560.1;HORVU5Hr1G018330.2	1	HORVU0Hr1G011560.1 HORVU0Hr1G011560	chrUn:65635848-65642722	HC_G	Methionine--tRNA ligase	GO:0000049, GO:0000166, GO:0004812, GO:0004825, GO:0005524, GO:0005737, GO:0006418, GO:0006431	PF01588, PF09334	IPR001412, IPR002547, IPR009080, IPR012340, IPR014729, IPR014758, IPR015413, IPR023458, IPR029038	5	NA	1.06444e-18	0.0735112	0.775152	0.983558	0.570531	0.600095	0.99294	0.556833	3.18227e-18	0.222143	0.999981	0.996789	0.739502	0.987073	0.999399	0.785553	0	0.800762	0	0.776164	1401
	tRNA-G	AT1G69410	sp|O23627|SYGM1_ARATH Glycine--tRNA ligase, mitochondrial 1 OS=Arabidopsis thaliana OX=3702 GN=At1g29880 PE=1 SV=1	1051.15	HORVU7Hr1G055340.1	1	HORVU7Hr1G055340.1 HORVU7Hr1G055340	chr7H:226514183-226519506	HC_G	Glycine--tRNA ligase	GO:0000166, GO:0004812, GO:0004820, GO:0005524, GO:0005737, GO:0006418, GO:0006426	PF00587, PF03129	IPR000738, IPR002314, IPR002315, IPR004154, IPR006195, IPR009068	5	X281	1.42456e-19	0.0299993	0.794494	0.702772	0.188172	0.746675	0.845823	0.180513	7.49707e-19	0.132595	0.999981	0.968725	0.425196	0.987073	0.999388	0.523826	0	0.523335	0	0.388657	1398
	tRNA-P	AT1G69410	sp|Q9FYR6|SYPM_ARATH Proline--tRNA ligase, chloroplastic/mitochondrial OS=Arabidopsis thaliana OX=3702 GN=OVA6 PE=2 SV=1	1032.27	HORVU2Hr1G057880.3	1	HORVU2Hr1G057880.3 HORVU2Hr1G057880	chr2H:373690065-373694302	HC_G	Proline--tRNA ligase	GO:0000166, GO:0004812, GO:0004827, GO:0005524, GO:0005737, GO:0006418, GO:0006433	PF00587, PF03129, PF09180	IPR002314, IPR002316, IPR004154, IPR004499, IPR006195, IPR016061, IPR017449	5	NA	4.20864e-17	0.176371	0.579691	0.904042	0.659974	0.752597	0.846497	0.759114	6.90506e-17	0.371591	0.999981	0.99243	0.803616	0.987073	0.999388	0.888029	0	1.63894	0	0.711601	2233
	tRNA-I	AT1G69410	sp|F4JLM5|SYIC_ARATH Isoleucine--tRNA ligase, cytoplasmic OS=Arabidopsis thaliana OX=3702 GN=At4g10320 PE=2 SV=1	1019.48	HORVU7Hr1G115280.8	1	HORVU7Hr1G115280.8 HORVU7Hr1G115280	chr7H:641086148-641099308	HC_G	Isoleucine--tRNA ligase	GO:0000166, GO:0002161, GO:0004812, GO:0004822, GO:0005524, GO:0005737, GO:0006418, GO:0006428	PF00133, PF08264	IPR001412, IPR002300, IPR002301, IPR009008, IPR009080, IPR013155, IPR014729, IPR023586	5	X461	2.53028e-18	0.259796	0.707364	0.901409	0.567762	0.594516	0.477418	0.246993	6.31045e-18	0.467293	0.999981	0.99243	0.737615	0.987073	0.999388	0.573257	0	1.29602	0	0.535771	1434
	uL3_RPL3A	AT1G43170	sp|P17094|RL31_ARATH 60S ribosomal protein L3-1 OS=Arabidopsis thaliana OX=3702 GN=ARP1 PE=1 SV=5	995.763	HORVU4Hr1G019980.1	1	HORVU4Hr1G019980.1 HORVU4Hr1G019980	chr4H:96770575-96773221	HC_G	ribosomal protein 1	GO:0003735, GO:0005622, GO:0005840, GO:0006412	PF00297	IPR000597, IPR009000, IPR019926	3	NA	1.72777e-18	0.00116367	0.962055	0.600413	0.672982	0.877904	0.817638	0.219157	4.63977e-18	0.0138969	0.999981	0.946344	0.811499	0.987073	0.999388	0.554785	0.0387692	1.35851	0	0.522718	418
	uL3_RPL3A	AT1G43170	sp|P17094|RL31_ARATH 60S ribosomal protein L3-1 OS=Arabidopsis thaliana OX=3702 GN=ARP1 PE=1 SV=5	993.076	HORVU5Hr1G036630.1	1	HORVU5Hr1G036630.1 HORVU5Hr1G036630	chr5H:259948875-259951686	HC_G	ribosomal protein 1	GO:0003735, GO:0005622, GO:0005840, GO:0006412	PF00297	IPR000597, IPR009000, IPR019926	3	NA	6.34518e-16	0.00436189	0.792096	0.267693	0.782852	0.861279	0.756235	0.0564365	8.43308e-16	0.0362372	0.999981	0.842221	0.878322	0.987073	0.999388	0.376509	0	0.306173	0	0.887752	417
	AtTIF3B1	AT5G27640	sp|Q9C5Z1|EIF3B_ARATH Eukaryotic translation initiation factor 3 subunit B OS=Arabidopsis thaliana OX=3702 GN=TIF3B1 PE=1 SV=1	965.002	HORVU5Hr1G106440.1	1	HORVU5Hr1G106440.1 HORVU5Hr1G106440	chr5H:623991059-623995742	HC_G	Eukaryotic translation initiation factor 3 subunit B	GO:0000166, GO:0003676, GO:0003723, GO:0003743, GO:0005515, GO:0005852, GO:0006413, GO:0031369	PF00076, PF08662	IPR000504, IPR011042, IPR011400, IPR012677, IPR013979, IPR015943	3	NA	7.25096e-19	0.0062721	0.896836	0.586208	0.500295	0.734596	0.853999	0.0283617	2.3606e-18	0.0463687	0.999981	0.943516	0.691803	0.987073	0.999388	0.350134	0.038359	0.0825982	0	0.662522	245
	tRNA-P	AT1G69410	sp|Q9M1R2|SYPC_ARATH Proline--tRNA ligase, cytoplasmic OS=Arabidopsis thaliana OX=3702 GN=At3g62120 PE=1 SV=1	946.239	HORVU3Hr1G093050.2	1	HORVU3Hr1G093050.2 HORVU3Hr1G093050	chr3H:640786088-640793553	HC_G	Proline--tRNA ligase	GO:0000166, GO:0004812, GO:0004827, GO:0005524, GO:0005737, GO:0006418, GO:0006433	PF00587, PF03129, PF09180	IPR002314, IPR002316, IPR004154, IPR004499, IPR006195, IPR016061, IPR017449	5	NA	1.93321e-17	0.471712	0.943856	0.876839	0.789404	0.788672	0.936547	0.707726	3.45226e-17	0.670489	0.999981	0.991412	0.88169	0.987073	0.999388	0.86392	0	1.77979	0	0.608493	2029
	eS4_RPS4D	AT5G58420	sp|Q8VYK6|RS43_ARATH 40S ribosomal protein S4-3 OS=Arabidopsis thaliana OX=3702 GN=RPS4D PE=2 SV=2	827.66	HORVU1Hr1G021720.1	1	HORVU1Hr1G021720.1 HORVU1Hr1G021720	chr1H:88880792-88883398	HC_G	40S ribosomal protein S4	GO:0003723, GO:0003735, GO:0005622, GO:0005840, GO:0006412	PF00467, PF00900, PF01479, PF08071, PF16121	IPR000876, IPR002942, IPR005824, IPR013843, IPR013845, IPR018199, IPR032277	3	NA	4.94292e-17	0.000814269	0.415722	0.189225	0.956031	0.701499	0.8152	0.320483	7.94192e-17	0.01056	0.999981	0.835875	0.978887	0.987073	0.999388	0.629312	0.0779487	0.601059	0	0.518244	438
	uL2_RPL8A	AT2G18020	sp|P46286|RL81_ARATH 60S ribosomal protein L8-1 OS=Arabidopsis thaliana OX=3702 GN=RPL8A PE=1 SV=2	816.079	HORVU5Hr1G021730.2	1	HORVU5Hr1G021730.2 HORVU5Hr1G021730	chr5H:106967797-106969568	HC_G	50S ribosomal protein L2	GO:0003723, GO:0003735, GO:0005622, GO:0005840, GO:0006412, GO:0015934	PF00181, PF03947	IPR002171, IPR008991, IPR012340, IPR014722, IPR014726, IPR022666, IPR022669, IPR022671, IPR023672	3	NA	5.13701e-15	0.00139732	0.698095	0.530172	0.471776	0.814263	0.658692	0.219888	6.20941e-15	0.0161439	0.999981	0.922785	0.670419	0.987073	0.999388	0.554785	0.0369231	0.958506	0	1.01259	412
	RPS3	ATMG00090	sp|Q95749|RT03_ARATH Ribosomal protein S3, mitochondrial OS=Arabidopsis thaliana OX=3702 GN=RPS3 PE=2 SV=3	807.053	HORVU0Hr1G011510.1	1	HORVU0Hr1G011510.1 HORVU0Hr1G011510	chrUn:65552328-65557511	HC_G	30S ribosomal protein S3	GO:0003735, GO:0005840, GO:0006412	PF00189	IPR001351, IPR018280	5	NA	1.37311e-14	0.0313821	0.203388	0.66268	0.353109	0.71256	0.596804	0.49709	1.59682e-14	0.135807	0.999981	0.963157	0.578196	0.987073	0.999388	0.744736	0	1.07245	0	0.782027	2314
	tRNA-E	AT1G69410	sp|Q9FEA2|SYEM_ARATH Glutamate--tRNA ligase, chloroplastic/mitochondrial OS=Arabidopsis thaliana OX=3702 GN=OVA3 PE=1 SV=1	757.919	HORVU6Hr1G012710.2	1	HORVU6Hr1G012710.2 HORVU6Hr1G012710	chr6H:25052387-25056598	HC_G	Glutamate--tRNA ligase	GO:0000049, GO:0000166, GO:0004812, GO:0004818, GO:0005524, GO:0005737, GO:0006418, GO:0006424, GO:0016876, GO:0043039	PF00749	IPR000924, IPR001412, IPR004527, IPR008925, IPR014729, IPR020058, IPR020061, IPR020751	5	NA	4.47473e-15	0.735404	0.722629	0.698004	0.642118	0.28687	0.674171	0.501245	5.43001e-15	0.843484	0.999981	0.968725	0.790473	0.987073	0.999388	0.749153	0	0.0108676	0	0.712279	2235
	Tif6-homolog	AT3G55620	sp|Q9M060|IF62_ARATH Eukaryotic translation initiation factor 6-2 OS=Arabidopsis thaliana OX=3702 GN=EIF6-2 PE=2 SV=1	715.473	HORVU2Hr1G026220.5	1	HORVU2Hr1G026220.5 HORVU2Hr1G026220	chr2H:83431674-83433254	HC_G	Eukaryotic translation initiation factor 6-2	GO:0042256, GO:0043022	PF01912	IPR002769	5	NA	6.74179e-19	0.382288	0.44222	0.411131	0.147163	0.513342	0.258562	0.00966142	2.23837e-18	0.594388	0.999981	0.881506	0.370742	0.987073	0.999388	0.327612	0	0.0171414	0	0.834677	1232
	EF1G2	AT1G57720	sp|Q9FVT2|EF1G2_ARATH Probable elongation factor 1-gamma 2 OS=Arabidopsis thaliana OX=3702 GN=At1g57720 PE=1 SV=1	695.165	HORVU7Hr1G087050.1	1	HORVU7Hr1G087050.1 HORVU7Hr1G087050	chr7H:524389993-524393327	HC_G	Elongation factor 1-gamma 2	GO:0003746, GO:0005515, GO:0006414	PF00647, PF02798, PF14497	IPR001662, IPR004045, IPR004046, IPR010987, IPR012336	3	NA	7.88408e-16	0.0505246	0.973785	0.344669	0.710146	0.71759	0.795936	0.0621066	1.03619e-15	0.179547	0.999981	0.856834	0.838405	0.987073	0.999388	0.379323	0	0.510782	0	1.09504	254
	eS6_RPS6B	AT5G10360	sp|P51430|RS62_ARATH 40S ribosomal protein S6-2 OS=Arabidopsis thaliana OX=3702 GN=RPS6B PE=1 SV=3	693.116	HORVU2Hr1G029890.1	1	HORVU2Hr1G029890.1 HORVU2Hr1G029890	chr2H:108643317-108645670	HC_G	40S ribosomal protein S6	GO:0003735, GO:0005622, GO:0005840, GO:0006412	PF01092	IPR001377, IPR014401, IPR018282	3	X471	6.92219e-14	0.00949509	0.239158	0.18316	0.448087	0.35882	0.686622	0.186374	7.68307e-14	0.0609452	0.999981	0.835875	0.653205	0.987073	0.999388	0.526083	0	0.242766	0	2.11439	375
	tRNA-T	AT1G69410	sp|O04630|SYTM1_ARATH Threonine--tRNA ligase, mitochondrial 1 OS=Arabidopsis thaliana OX=3702 GN=THRRS PE=1 SV=3	673.496	HORVU3Hr1G012410.6	1	HORVU3Hr1G012410.6 HORVU3Hr1G012410	chr3H:26934313-26955710	HC_G	Threonine--tRNA ligase	GO:0000166, GO:0004812, GO:0004829, GO:0005524, GO:0005737, GO:0006418, GO:0006435, GO:0016876, GO:0043039	PF00587, PF02824, PF03129, PF07973	IPR002314, IPR002320, IPR004095, IPR004154, IPR006195, IPR012675, IPR012676, IPR012947, IPR018163	5	NA	9.42175e-18	0.3559	0.789366	0.883592	0.840797	0.835626	0.862545	0.27754	1.86335e-17	0.565614	0.999981	0.992334	0.912666	0.987073	0.999388	0.602304	0	0.874426	0	0.630199	1850
	tRNA-K	AT1G69410	sp|Q9ZPI1|SYKC_ARATH Lysine--tRNA ligase, cytoplasmic OS=Arabidopsis thaliana OX=3702 GN=At3g11710 PE=1 SV=1	663.946	HORVU5Hr1G106380.6	1	HORVU5Hr1G106380.6 HORVU5Hr1G106380	chr5H:623949358-623954861	HC_G	Lysine--tRNA ligase	GO:0000166, GO:0003676, GO:0004812, GO:0004824, GO:0005524, GO:0005737, GO:0006418, GO:0006430	PF00152, PF01336	IPR002313, IPR004364, IPR004365, IPR006195, IPR012340, IPR018149	3	X109	3.04024e-18	0.022323	0.875311	0.455065	0.602473	0.7543	0.818709	0.0213787	7.31069e-18	0.110679	0.999981	0.898555	0.762764	0.987073	0.999388	0.329107	0	1.69558	0	0.926331	237
	IF2AH	AT2G40290	sp|Q9SIZ2|IF2AH_ARATH Eukaryotic translation initiation factor 2 subunit alpha homolog OS=Arabidopsis thaliana OX=3702 GN=At2g40290 PE=1 SV=2	641.584	HORVU2Hr1G014580.1	1	HORVU2Hr1G014580.1 HORVU2Hr1G014580	chr2H:31784211-31788103	HC_G	eukaryotic translation initiation factor 2 alpha subunit	GO:0003676, GO:0003723, GO:0003743, GO:0005850	PF00575, PF07541	IPR003029, IPR011488, IPR012340, IPR022967, IPR024054, IPR024055	3	X109	2.20677e-18	0.00780372	0.905006	0.226558	0.315045	0.922218	0.675597	0.0137242	5.66643e-18	0.0540957	0.999981	0.836614	0.546047	0.989256	0.999388	0.327612	0	1.4592	0	0.6667	231
	eL8_RPL7aA	AT2G47610	sp|P49692|RL7A1_ARATH 60S ribosomal protein L7a-1 OS=Arabidopsis thaliana OX=3702 GN=RPL7AA PE=2 SV=2	636.019	HORVU5Hr1G076700.2	1	HORVU5Hr1G076700.2 HORVU5Hr1G076700	chr5H:551809410-551811794	HC_G	60S ribosomal protein L7a	GO:0030529, GO:0042254	PF01248	IPR001921, IPR004037, IPR004038, IPR018492, IPR029064	3	NA	1.64563e-19	2.61057e-05	0.857035	0.715219	0.888592	0.984629	0.80542	0.97309	8.35916e-19	0.000900646	0.999981	0.968725	0.937419	0.999513	0.999388	0.989176	0.452718	0.868946	0	0.916671	491
	uL4_RPL4D	AT5G02870	sp|P49691|RL4B_ARATH 60S ribosomal protein L4-2 OS=Arabidopsis thaliana OX=3702 GN=RPL4D PE=1 SV=2	634.971	HORVU5Hr1G105870.1	1	HORVU5Hr1G105870.1 HORVU5Hr1G105870	chr5H:622808285-622810943	HC_G	60S ribosomal protein L4-1	GO:0003735, GO:0005840, GO:0006412	PF00573, PF14374	IPR002136, IPR013000, IPR023574, IPR025755	3	NA	9.18433e-17	0.239296	0.231686	0.205024	0.997357	0.399749	0.882267	0.145273	1.39705e-16	0.447936	0.999981	0.835875	0.997759	0.987073	0.999388	0.488332	0	1.45027	0	0.958176	590
	uL1_RPL10aA	AT1G08360	sp|Q8VZB9|R10A1_ARATH 60S ribosomal protein L10a-1 OS=Arabidopsis thaliana OX=3702 GN=RPL10AA PE=1 SV=1	624.68	HORVU7Hr1G059090.5;HORVU4Hr1G001350.5	1	HORVU7Hr1G059090.5 HORVU7Hr1G059090	chr7H:263804799-263806957	HC_G	60S ribosomal protein L1-B	GO:0003723, GO:0003735, GO:0006412, GO:0015934	PF00687	IPR002143, IPR016094, IPR016095, IPR023673, IPR023674, IPR028364	5	NA	1.00019e-14	0.414628	0.971377	0.742437	0.0874397	0.461905	0.556173	0.0452022	1.1758e-14	0.624961	0.999981	0.968725	0.27775	0.987073	0.999388	0.362201	0	0.862878	0	0.658375	1248
	uL5_RPL11A	AT2G42740	sp|P42795|RL111_ARATH 60S ribosomal protein L11-1 OS=Arabidopsis thaliana OX=3702 GN=RPL11A PE=2 SV=2	608.171	HORVU3Hr1G026060.1;HORVU1Hr1G028820.1;HORVU0Hr1G003140.1;HORVU2Hr1G029090.3;HORVU7Hr1G044560.1;HORVU2Hr1G042010.2;HORVU2Hr1G041980.1	1	HORVU3Hr1G026060.1 HORVU3Hr1G026060	chr3H:103986514-103988924	HC_G	50S ribosomal protein L5	GO:0003735, GO:0005622, GO:0005840, GO:0006412	PF00281, PF00673	IPR002132, IPR020929, IPR022803, IPR031309, IPR031310	3	X410	3.97583e-17	0.000939536	0.354994	0.141172	0.853753	0.651908	0.87879	0.0847128	6.57083e-17	0.0118615	0.999981	0.835875	0.919041	0.987073	0.999388	0.412601	0	0.101333	0	1.08405	423
	tRNA-W	AT1G69410	sp|Q9SR15|SYWC_ARATH Tryptophan--tRNA ligase, cytoplasmic OS=Arabidopsis thaliana OX=3702 GN=At3g04600 PE=2 SV=1	607.339	HORVU5Hr1G025320.6	1	HORVU5Hr1G025320.6 HORVU5Hr1G025320	chr5H:138069281-138073403	HC_G	Tryptophan--tRNA ligase	GO:0000166, GO:0004812, GO:0004830, GO:0005524, GO:0005737, GO:0006418, GO:0006436	PF00579	IPR001412, IPR002305, IPR002306, IPR014729	5	NA	4.11654e-19	0.456335	0.781346	0.659686	0.276031	0.959519	0.547587	0.352191	1.57047e-18	0.660569	0.999981	0.961977	0.515442	0.99798	0.999388	0.649818	0	1.1223	0	0.89182	1426
	uS3_RPS3C	AT5G35530	sp|Q9FJA6|RS33_ARATH 40S ribosomal protein S3-3 OS=Arabidopsis thaliana OX=3702 GN=RPS3C PE=1 SV=1	598.035	HORVU7Hr1G067280.1;HORVU5Hr1G034770.1	1	HORVU7Hr1G067280.1 HORVU7Hr1G067280	chr7H:350974016-350976357	HC_G	Ribosomal protein S3 family protein	GO:0003723, GO:0003735, GO:0005840, GO:0006412, GO:0015935	PF00189, PF07650	IPR001351, IPR004044, IPR005703, IPR009019, IPR015946, IPR018280	3	X410	7.26396e-17	4.55792e-05	0.879413	0.490676	0.553634	0.851321	0.910848	0.107507	1.12914e-16	0.00133807	0.999981	0.907997	0.730073	0.987073	0.999388	0.449573	0.454154	1.25336	0	0.524504	422
	uL1_RPL10aA	AT1G08360	sp|Q8VZB9|R10A1_ARATH 60S ribosomal protein L10a-1 OS=Arabidopsis thaliana OX=3702 GN=RPL10AA PE=1 SV=1	582.802	HORVU3Hr1G084310.1	1	HORVU3Hr1G084310.1 HORVU3Hr1G084310	chr3H:606944820-606947945	HC_G	60S ribosomal protein L1-A	GO:0003723, GO:0003735, GO:0006412, GO:0015934	PF00687	IPR002143, IPR016094, IPR016095, IPR023673, IPR023674, IPR028364	3	X352	1.57933e-16	0.00659278	0.843653	0.720182	0.431819	0.51291	0.938956	0.346909	2.29688e-16	0.0481661	0.999981	0.968725	0.641147	0.987073	0.999388	0.648813	0	1.14682	0	0.532568	477
	uL14_RPL23A,uL14_RPL23B,uL14_RPL23C	AT1G04480,AT2G33370,AT3G04400	sp|P49690|RL23_ARATH 60S ribosomal protein L23 OS=Arabidopsis thaliana OX=3702 GN=RPL23A PE=2 SV=3	575.702	HORVU6Hr1G090170.1;HORVU1Hr1G039160.1	2	HORVU1Hr1G039160.1 HORVU1Hr1G039160	chr1H:274026403-274028245	HC_G	50S ribosomal protein L14	GO:0003735, GO:0005840, GO:0006412	PF00238	IPR000218, IPR019972, IPR023571	3	NA	1.02226e-16	0.000234305	0.238659	0.403239	0.822077	0.80045	0.641682	0.202913	1.53989e-16	0.0044092	0.999981	0.877866	0.903158	0.987073	0.999388	0.542386	0	0.719556	0	1.00078	368
	tRNA-N	AT1G69410	sp|Q9SW96|SYNC1_ARATH Asparagine--tRNA ligase, cytoplasmic 1 OS=Arabidopsis thaliana OX=3702 GN=SYNC1 PE=1 SV=1	574.321	HORVU1Hr1G021130.2	1	HORVU1Hr1G021130.2 HORVU1Hr1G021130	chr1H:84343764-84347935	HC_G	Asparagine--tRNA ligase	GO:0000166, GO:0003676, GO:0004812, GO:0004816, GO:0005524, GO:0005737, GO:0006418, GO:0006421	PF00152, PF00458, PF01336	IPR000738, IPR002312, IPR004364, IPR004365, IPR004522, IPR006195, IPR009068, IPR012340	5	NA	4.54023e-18	0.156261	0.832292	0.612328	0.545896	0.524365	0.948255	0.127825	1.00516e-17	0.345638	0.999981	0.953195	0.72885	0.987073	0.999388	0.472497	0	1.09074	0	0.711891	1387
	AtTIFI1	AT2G46280	sp|Q38884|EIF3I_ARATH Eukaryotic translation initiation factor 3 subunit I OS=Arabidopsis thaliana OX=3702 GN=TIF3I1 PE=2 SV=2	572.977	HORVU4Hr1G040280.4	1	HORVU4Hr1G040280.4 HORVU4Hr1G040280	chr4H:309109269-309113323	HC_G	Eukaryotic translation initiation factor 3 subunit I	GO:0003743, GO:0005515, GO:0005737, GO:0005852	PF00400	IPR001680, IPR015943, IPR017986, IPR019775, IPR020472, IPR027525	3	NA	3.6273e-17	0.0833344	0.362256	0.247904	0.335837	0.580714	0.950534	0.019644	6.03093e-17	0.239586	0.999981	0.840832	0.560722	0.987073	0.999388	0.327612	0	0.560577	0	1.20134	292
	uL4_RPL4A	AT3G09630	sp|Q9SF40|RL4A_ARATH 60S ribosomal protein L4-1 OS=Arabidopsis thaliana OX=3702 GN=RPL4A PE=1 SV=1	563.217	HORVU4Hr1G075710.1	1	HORVU4Hr1G075710.1 HORVU4Hr1G075710	chr4H:599032193-599035023	HC_G	60S ribosomal protein L4-1	GO:0003735, GO:0005840, GO:0006412	PF00573, PF14374	IPR002136, IPR013000, IPR023574, IPR025755	3	NA	2.99213e-15	0.00201339	0.384805	0.146996	0.970834	0.522012	0.950318	0.178978	3.68673e-15	0.0211407	0.999981	0.835875	0.98644	0.987073	0.999388	0.523025	0	0.907838	0	1.51346	409
	AtTIF3H1	AT1G10840	sp|Q9C5Z2|EIF3H_ARATH Eukaryotic translation initiation factor 3 subunit H OS=Arabidopsis thaliana OX=3702 GN=TIF3H1 PE=1 SV=2	563.204	HORVU2Hr1G068360.8	1	HORVU2Hr1G068360.8 HORVU2Hr1G068360	chr2H:480463522-480469226	HC_G	Eukaryotic translation initiation factor 3 subunit H	GO:0003743, GO:0005515, GO:0005737, GO:0005852	PF01398	IPR000555, IPR027524	3	NA	3.83307e-18	0.0167175	0.553005	0.176014	0.300588	0.844566	0.453423	0.00517556	8.80791e-18	0.0898835	0.999981	0.835875	0.536531	0.987073	0.999388	0.317147	0	0.754254	0	0.377896	230
	eL20_RPL18aB	AT2G34480	sp|P51418|R18A2_ARATH 60S ribosomal protein L18a-2 OS=Arabidopsis thaliana OX=3702 GN=RPL18AB PE=1 SV=2	562.865	HORVU1Hr1G088040.2	1	HORVU1Hr1G088040.2 HORVU1Hr1G088040	chr1H:540809511-540812264	HC_G	60S ribosomal protein L18A-1	GO:0003735, GO:0005840, GO:0006412	PF01775	IPR021138, IPR023573, IPR028877	3	NA	1.8656e-19	0.000137037	0.274225	0.12234	0.986324	0.772754	0.413214	0.145311	8.96355e-19	0.00293449	0.999981	0.835875	0.996588	0.987073	0.999388	0.488332	0.149333	1.38244	0	0.528392	441
	eS6_RPS6B	AT5G10360	sp|P51430|RS62_ARATH 40S ribosomal protein S6-2 OS=Arabidopsis thaliana OX=3702 GN=RPS6B PE=1 SV=3	561.803	HORVU2Hr1G010870.8;HORVU2Hr1G010890.2	1	HORVU2Hr1G010870.8 HORVU2Hr1G010870	chr2H:21417078-21419777	HC_G	40S ribosomal protein S6	GO:0003735, GO:0005622, GO:0005840, GO:0006412	PF01092	IPR001377, IPR014401, IPR018282	3	X471	5.54975e-17	0.0344589	0.147047	0.0594277	0.876603	0.258805	0.299492	0.267798	8.83125e-17	0.143377	0.999981	0.835875	0.931742	0.987073	0.999388	0.588161	0	1.1347	0	1.03665	378
	eL19_RPL19C	AT4G02230	sp|P49693|RL193_ARATH 60S ribosomal protein L19-3 OS=Arabidopsis thaliana OX=3702 GN=RPL19C PE=2 SV=3	557.447	HORVU4Hr1G049670.2	1	HORVU4Hr1G049670.2 HORVU4Hr1G049670	chr4H:403634462-403636621	HC_G	60S ribosomal protein L19-1	GO:0003735, GO:0005622, GO:0005840, GO:0006412	PF01280	IPR000196, IPR015972, IPR015974, IPR023638	3	NA	1.77213e-12	0.128688	0.233634	0.45273	0.365417	0.116076	0.469827	0.813675	1.87557e-12	0.308674	0.999981	0.898555	0.589165	0.987073	0.999388	0.918129	0	0.839432	0	0.540485	383
	uL10_RPP0A	AT2G40010	sp|O04204|RLA01_ARATH 60S acidic ribosomal protein P0-1 OS=Arabidopsis thaliana OX=3702 GN=RPP0A PE=1 SV=1	556.811	HORVU7Hr1G073720.5	1	HORVU7Hr1G073720.5 HORVU7Hr1G073720	chr7H:419565969-419568853	HC_G	60S acidic ribosomal protein P0	GO:0005622, GO:0042254	PF00428, PF00466	IPR001790, IPR030670	3	X59	1.377e-15	0.00470924	0.473204	0.197022	0.94751	0.503272	0.837165	0.155949	1.76041e-15	0.0380538	0.999981	0.835875	0.974997	0.987073	0.999388	0.501784	0.0377436	0.606736	0	1.26167	433
	uS4_RPS9C	AT5G39850	sp|Q9FLF0|RS92_ARATH 40S ribosomal protein S9-2 OS=Arabidopsis thaliana OX=3702 GN=RPS9C PE=1 SV=1	553.343	HORVU5Hr1G038920.1	1	HORVU5Hr1G038920.1 HORVU5Hr1G038920	chr5H:280775389-280777931	HC_G	Ribosomal protein S4	GO:0003723, GO:0003735, GO:0005622, GO:0006412, GO:0015935, GO:0019843	PF00163, PF01479	IPR001912, IPR002942, IPR005710, IPR018079	3	X91	3.29968e-16	0.00382837	0.730996	0.270117	0.04585	0.598623	0.475417	0.039611	4.57899e-16	0.0331348	0.999981	0.842221	0.190454	0.987073	0.999388	0.356606	0.0730256	0.975693	0	0.536529	480
	uS8_RPS15aA,uS8_RPS15aF	AT1G07770,AT5G59850	sp|P42798|R15A1_ARATH 40S ribosomal protein S15a-1 OS=Arabidopsis thaliana OX=3702 GN=RPS15AA PE=2 SV=2	552.665	HORVU1Hr1G072060.1;HORVU3Hr1G086930.1	1	HORVU1Hr1G072060.1 HORVU1Hr1G072060	chr1H:495884739-495886729	HC_G	30S ribosomal protein S8	GO:0003735, GO:0005840, GO:0006412	PF00410	IPR000630	3	NA	2.67278e-18	0.00171376	0.896685	0.80051	0.441482	0.474143	0.835788	0.1335	6.59958e-18	0.0189199	0.999981	0.981203	0.646604	0.987073	0.999388	0.474024	0	0.387889	0	0.72556	210
	uS12_RPS23B	AT5G02960	sp|P49201|RS232_ARATH 40S ribosomal protein S23-2 OS=Arabidopsis thaliana OX=3702 GN=RPS23B PE=2 SV=2	552.523	HORVU5Hr1G112390.1;HORVU5Hr1G066080.1;HORVU1Hr1G071570.1;HORVU3Hr1G087380.1	1	HORVU5Hr1G112390.1 HORVU5Hr1G112390	chr5H:639095929-639098900	HC_G	30S ribosomal protein S12	GO:0003735, GO:0005622, GO:0005840, GO:0006412, GO:0015935	PF00164	IPR005680, IPR006032, IPR012340	3	NA	1.31156e-13	0.229855	0.439656	0.463944	0.920648	0.428212	0.939801	0.242833	1.43965e-13	0.439187	0.999981	0.90111	0.956858	0.987073	0.999388	0.569196	0	0.714127	0	0.758007	170
	uS12_RPS23B	AT5G02960	sp|P49201|RS232_ARATH 40S ribosomal protein S23-2 OS=Arabidopsis thaliana OX=3702 GN=RPS23B PE=2 SV=2	552.523	HORVU5Hr1G112390.1;HORVU5Hr1G066080.1;HORVU1Hr1G071570.1;HORVU3Hr1G087380.1	2	HORVU5Hr1G066080.1 HORVU5Hr1G066080	chr5H:504928504-504931996	HC_G	30S ribosomal protein S12	GO:0003735, GO:0005622, GO:0005840, GO:0006412, GO:0015935	PF00164	IPR005680, IPR006032, IPR012340	3	NA	1.31156e-13	0.229855	0.439656	0.463944	0.920648	0.428212	0.939801	0.242833	1.43965e-13	0.439187	0.999981	0.90111	0.956858	0.987073	0.999388	0.569196	0	0.714127	0	0.758007	170
	uS12_RPS23B	AT5G02960	sp|P49201|RS232_ARATH 40S ribosomal protein S23-2 OS=Arabidopsis thaliana OX=3702 GN=RPS23B PE=2 SV=2	552.523	HORVU5Hr1G112390.1;HORVU5Hr1G066080.1;HORVU1Hr1G071570.1;HORVU3Hr1G087380.1	3	HORVU1Hr1G071570.1 HORVU1Hr1G071570	chr1H:493622114-493624232	HC_G	30S ribosomal protein S12	GO:0003735, GO:0005622, GO:0005840, GO:0006412, GO:0015935	PF00164	IPR005680, IPR006032, IPR012340	3	NA	1.31156e-13	0.229855	0.439656	0.463944	0.920648	0.428212	0.939801	0.242833	1.43965e-13	0.439187	0.999981	0.90111	0.956858	0.987073	0.999388	0.569196	0	0.714127	0	0.758007	170
	eS1_RPS3aB	AT4G34670	sp|Q42262|RS3A2_ARATH 40S ribosomal protein S3a-2 OS=Arabidopsis thaliana OX=3702 GN=RPS3AB PE=2 SV=3	548.534	HORVU4Hr1G070370.1	1	HORVU4Hr1G070370.1 HORVU4Hr1G070370	chr4H:575312651-575314951	HC_G	40S ribosomal protein S3a	GO:0003735, GO:0005622, GO:0005840, GO:0006412	PF01015	IPR001593, IPR018281, IPR027500	3	X151	2.47579e-16	0.000144369	0.333094	0.0716295	0.529695	0.732815	0.602177	0.0332068	3.5022e-16	0.00303909	0.999981	0.835875	0.717819	0.987073	0.999388	0.350689	0.147077	0.325446	0	1.09264	428
	uL18_RPL5A	AT3G25520	sp|Q8LBI1|RL51_ARATH 60S ribosomal protein L5-1 OS=Arabidopsis thaliana OX=3702 GN=ATL5 PE=1 SV=2	547.506	HORVU5Hr1G092630.1	1	HORVU5Hr1G092630.1 HORVU5Hr1G092630	chr5H:588904933-588907794	HC_G	60S ribosomal protein L5-1	GO:0003735, GO:0005622, GO:0005840, GO:0006412, GO:0008097	PF00861, PF14204	IPR005484, IPR005485, IPR025607	3	X151	4.31614e-17	0.00226164	0.339378	0.0656045	0.436403	0.791858	0.739976	0.111365	7.04421e-17	0.0227446	0.999981	0.835875	0.644486	0.987073	0.999388	0.453427	0	0.701417	0	1.69744	426
	tRNA-E	AT1G69410	sp|O82462|SYEC_ARATH Glutamate--tRNA ligase, cytoplasmic OS=Arabidopsis thaliana OX=3702 GN=At5g26710 PE=1 SV=1	540.955	HORVU3Hr1G038360.1;HORVU1Hr1G078370.2	1	HORVU3Hr1G038360.1 HORVU3Hr1G038360	chr3H:221289077-221294341	HC_G	Glutamine--tRNA ligase	GO:0000166, GO:0004812, GO:0004818, GO:0005524, GO:0005737, GO:0006412, GO:0006418, GO:0006424, GO:0016876, GO:0043039	PF00749, PF03950, PF14497	IPR000924, IPR001412, IPR004046, IPR004526, IPR010987, IPR011035, IPR012336, IPR014729, IPR020056, IPR020058, IPR020059, IPR020061	5	NA	1.07878e-17	0.900981	0.92663	0.303665	0.252755	0.507117	0.442033	0.40168	2.09025e-17	0.945869	0.999981	0.842797	0.49127	0.987073	0.999388	0.684813	0	0.127534	0	0.808142	1753
	uL13_RPL13aD	AT5G48760	sp|Q9FKC0|R13A4_ARATH 60S ribosomal protein L13a-4 OS=Arabidopsis thaliana OX=3702 GN=RPL13AD PE=2 SV=1	537.52	HORVU5Hr1G096060.1	1	HORVU5Hr1G096060.1 HORVU5Hr1G096060	chr5H:600469098-600471664	HC_G	60S ribosomal protein L13a-4	GO:0003735, GO:0005840, GO:0006412, GO:0015934	PF00572	IPR005755, IPR005822, IPR023563, IPR023564	3	NA	1.12427e-15	0.0105214	0.686182	0.265269	0.712762	0.541678	0.285317	0.0664585	1.45453e-15	0.0648515	0.999981	0.842221	0.840693	0.987073	0.999388	0.384855	0.038359	1.0194	0	1.168	357
	EFTU	AT4G20360	sp|P17745|EFTU_ARATH Elongation factor Tu, chloroplastic OS=Arabidopsis thaliana OX=3702 GN=TUFA PE=1 SV=1	532.797	HORVU6Hr1G053680.5	1	HORVU6Hr1G053680.5 HORVU6Hr1G053680	chr6H:336377832-336379785	HC_G	Elongation factor Tu	GO:0003746, GO:0003924, GO:0005525, GO:0005622, GO:0006414	PF00009, PF03143, PF03144	IPR000795, IPR004160, IPR004161, IPR004541, IPR009000, IPR009001, IPR027417, IPR031157	5	X1444	6.32265e-15	0.678785	0.995188	0.485599	0.276189	0.509194	0.84981	0.112298	7.58351e-15	0.812971	0.999981	0.903949	0.515442	0.987073	0.999388	0.453427	0	1.64814	0	0.906348	2274
	IF2AH	AT2G40290	sp|Q9SIZ2|IF2AH_ARATH Eukaryotic translation initiation factor 2 subunit alpha homolog OS=Arabidopsis thaliana OX=3702 GN=At2g40290 PE=1 SV=2	532.468	HORVU4Hr1G055500.1	1	HORVU4Hr1G055500.1 HORVU4Hr1G055500	chr4H:465280399-465284288	HC_G	eukaryotic translation initiation factor 2 alpha subunit	GO:0003676, GO:0003723, GO:0003743, GO:0005850	PF00575, PF07541	IPR003029, IPR011488, IPR012340, IPR022967, IPR024054, IPR024055	5	NA	2.56375e-19	0.0288584	0.663389	0.570773	0.403002	0.778418	0.890039	0.223505	1.13115e-18	0.129733	0.999981	0.940503	0.617419	0.987073	0.999388	0.555308	0	0.216751	0	0.502098	1608
	uS11_RPS14C	AT3G52580	sp|P42036|RS143_ARATH 40S ribosomal protein S14-3 OS=Arabidopsis thaliana OX=3702 GN=RPS14C PE=2 SV=2	531.304	HORVU7Hr1G104220.3	1	HORVU7Hr1G104220.3 HORVU7Hr1G104220	chr7H:614230250-614232292	HC_G	30S ribosomal protein S11	GO:0003735, GO:0005840, GO:0006412	PF00411	IPR001971, IPR018102	3	NA	1.66021e-18	0.0130057	0.976755	0.316194	0.460465	0.84731	0.677056	0.0540752	4.48746e-18	0.0754817	0.999981	0.848468	0.664224	0.987073	0.999388	0.373466	0.0315897	0.549424	0	1.4982	398
	uL16_RPL10B	AT1G26910	sp|Q08770|RL102_ARATH 60S ribosomal protein L10-2 OS=Arabidopsis thaliana OX=3702 GN=RPL10B PE=2 SV=2	525.758	HORVU1Hr1G024710.2	1	HORVU1Hr1G024710.2 HORVU1Hr1G024710	chr1H:115706038-115708321	HC_G	60S ribosomal protein L10-2	GO:0003735, GO:0005622, GO:0005840, GO:0006412	PF00252	IPR001197, IPR016180, IPR018255	3	NA	1.92155e-16	0.0248002	0.993832	0.253655	0.764502	0.930022	0.849172	0.234838	2.75426e-16	0.119156	0.999981	0.840832	0.868881	0.994051	0.999388	0.566348	0	0.275979	0	1.15831	212
	eL13_RPL13B	AT3G49010	sp|P41127|RL131_ARATH 60S ribosomal protein L13-1 OS=Arabidopsis thaliana OX=3702 GN=RPL13B PE=1 SV=1	520.207	HORVU6Hr1G009400.2;HORVU7Hr1G067060.1	1	HORVU6Hr1G009400.2 HORVU6Hr1G009400	chr6H:16749096-16751247	HC_G	60S ribosomal protein L13-1	GO:0003735, GO:0005622, GO:0005840, GO:0006412	PF01294	IPR001380, IPR018256	3	X471	1.46298e-15	0.0479025	0.203648	0.144568	0.731997	0.17721	0.595888	0.594051	1.86552e-15	0.175761	0.999981	0.835875	0.850061	0.987073	0.999388	0.798066	0	0.997272	0	1.09024	377
	tRNA-S	AT1G69410	sp|Q39230|SYSC_ARATH Serine--tRNA ligase, cytoplasmic OS=Arabidopsis thaliana OX=3702 GN=At5g27470 PE=1 SV=1	519.01	HORVU6Hr1G080800.2	1	HORVU6Hr1G080800.2 HORVU6Hr1G080800	chr6H:542860232-542864364	HC_G	Serine--tRNA ligase	GO:0000166, GO:0004812, GO:0004828, GO:0005524, GO:0005737, GO:0006418, GO:0006434	PF00587, PF02403	IPR002314, IPR002317, IPR006195, IPR010978, IPR015866	5	NA	1.28877e-19	0.0444403	0.845717	0.0891336	0.125206	0.968621	0.71461	0.295866	6.98974e-19	0.168277	0.999981	0.835875	0.332907	0.998249	0.999388	0.611856	0	0.15561	0	0.822003	1422
	eS8_RPS8B	AT5G59240	sp|Q9FIF3|RS82_ARATH 40S ribosomal protein S8-2 OS=Arabidopsis thaliana OX=3702 GN=RPS8B PE=2 SV=1	512.156	HORVU2Hr1G067370.5	1	HORVU2Hr1G067370.5 HORVU2Hr1G067370	chr2H:472632586-472634600	HC_G	40S ribosomal protein S8	GO:0003735, GO:0005622, GO:0005840, GO:0006412	PF01201	IPR001047, IPR018283, IPR022309	3	NA	6.32714e-16	0.0465594	0.592319	0.195174	0.949876	0.462447	0.439466	0.105264	8.41811e-16	0.172875	0.999981	0.835875	0.974997	0.987073	0.999388	0.444603	0	0.397528	0	1.69747	406
	eS1_RPS3aB	AT4G34670	sp|Q42262|RS3A2_ARATH 40S ribosomal protein S3a-2 OS=Arabidopsis thaliana OX=3702 GN=RPS3AB PE=2 SV=3	504.031	HORVU1Hr1G032060.4	1	HORVU1Hr1G032060.4 HORVU1Hr1G032060	chr1H:197717447-197720315	HC_G	40S ribosomal protein S3a	GO:0003735, GO:0005622, GO:0005840, GO:0006412	PF01015	IPR001593, IPR018281, IPR027500	3	NA	7.99935e-18	0.00357038	0.392893	0.220464	0.0252419	0.829729	0.821255	0.216962	1.63408e-17	0.0317277	0.999981	0.836614	0.132841	0.987073	0.999388	0.553321	0	1.27539	0	0.630065	526
	eL21_RPL21A,eL21_RPL21C	AT1G09590,AT1G09690	sp|Q43291|RL211_ARATH 60S ribosomal protein L21-1 OS=Arabidopsis thaliana OX=3702 GN=RPL21A PE=2 SV=2	500.61	HORVU1Hr1G038890.1	1	HORVU1Hr1G038890.1 HORVU1Hr1G038890	chr1H:271292873-271294712	HC_G	60S ribosomal protein L21-1	GO:0003735, GO:0005622, GO:0005840, GO:0006412	PF01157	IPR001147, IPR008991, IPR018259	3	NA	5.30973e-16	0.00165359	0.256952	0.152972	0.997217	0.620907	0.727605	0.327878	7.1371e-16	0.0183372	0.999981	0.835875	0.997759	0.987073	0.999388	0.637124	0	0.96655	0	0.606795	411
	uS11_RPS14C	AT3G52580	sp|P42036|RS143_ARATH 40S ribosomal protein S14-3 OS=Arabidopsis thaliana OX=3702 GN=RPS14C PE=2 SV=2	499.243	HORVU2Hr1G073150.1;HORVU0Hr1G004130.1	1	HORVU2Hr1G073150.1 HORVU2Hr1G073150	chr2H:526173045-526175589	HC_G	30S ribosomal protein S11	GO:0003735, GO:0005840, GO:0006412	PF00411	IPR001971, IPR018102	3	X59	6.63746e-16	0.00284595	0.458595	0.452854	0.658844	0.318331	0.862108	0.244165	8.81211e-16	0.0271619	0.999981	0.898555	0.802632	0.987073	0.999388	0.571097	0	0.145248	0	0.956305	436
	eL13_RPL13B	AT3G49010	sp|P41127|RL131_ARATH 60S ribosomal protein L13-1 OS=Arabidopsis thaliana OX=3702 GN=RPL13B PE=1 SV=1	498.833	HORVU6Hr1G009400.2;HORVU7Hr1G067060.1	2	HORVU7Hr1G067060.1 HORVU7Hr1G067060	chr7H:347129641-347132048	HC_G	60S ribosomal protein L13-1	GO:0003735, GO:0005622, GO:0005840, GO:0006412	PF01294	IPR001380, IPR018256	3	X471	1.46298e-15	0.0479025	0.203648	0.144568	0.731997	0.17721	0.595888	0.594051	1.86552e-15	0.175761	0.999981	0.835875	0.850061	0.987073	0.999388	0.798066	0	0.997272	0	1.09024	377
	eL18_RPL18C	AT5G27850	sp|Q940B0|RL183_ARATH 60S ribosomal protein L18-3 OS=Arabidopsis thaliana OX=3702 GN=RPL18C PE=2 SV=1	495.886	HORVU2Hr1G018820.1	1	HORVU2Hr1G018820.1 HORVU2Hr1G018820	chr2H:48473942-48476008	HC_G	60S ribosomal protein L18-2	GO:0003735, GO:0005622, GO:0005840, GO:0006412	none	IPR021131, IPR021132	3	NA	9.87905e-19	8.93627e-05	0.297536	0.643467	0.552317	0.848288	0.96718	0.758277	2.99765e-18	0.00207051	0.999981	0.958306	0.73006	0.987073	0.999388	0.887634	0.110974	1.12404	0	0.742409	487
	tRNA-S	AT1G69410	sp|Q39230|SYSC_ARATH Serine--tRNA ligase, cytoplasmic OS=Arabidopsis thaliana OX=3702 GN=At5g27470 PE=1 SV=1	494.384	HORVU4Hr1G070630.2	1	HORVU4Hr1G070630.2 HORVU4Hr1G070630	chr4H:577036452-577041335	HC_G	Serine--tRNA ligase	GO:0000166, GO:0004812, GO:0004828, GO:0005524, GO:0005737, GO:0006418, GO:0006434	PF00587, PF02403	IPR002314, IPR002317, IPR006195, IPR010978, IPR015866	5	NA	5.8533e-21	0.0625689	0.609214	0.373916	0.770566	0.981208	0.789696	0.0553973	1.35507e-19	0.201584	0.999981	0.860227	0.872418	0.999513	0.999388	0.375975	0	1.54614	0	0.833849	1840
	uS3_RPS3C	AT5G35530	sp|Q9FJA6|RS33_ARATH 40S ribosomal protein S3-3 OS=Arabidopsis thaliana OX=3702 GN=RPS3C PE=1 SV=1	478.035	HORVU7Hr1G067280.1;HORVU5Hr1G034770.1	2	HORVU5Hr1G034770.1 HORVU5Hr1G034770	chr5H:236531725-236534211	HC_G	Ribosomal protein S3 family protein	GO:0003723, GO:0003735, GO:0005840, GO:0006412, GO:0015935	PF00189, PF07650	IPR001351, IPR004044, IPR005703, IPR009019, IPR015946, IPR018280	3	X410	7.26396e-17	4.55792e-05	0.879413	0.490676	0.553634	0.851321	0.910848	0.107507	1.12914e-16	0.00133807	0.999981	0.907997	0.730073	0.987073	0.999388	0.449573	0.454154	1.25336	0	0.524504	422
	uL30_RPL7C	AT2G44120	sp|P60039|RL73_ARATH 60S ribosomal protein L7-3 OS=Arabidopsis thaliana OX=3702 GN=RPL7C PE=2 SV=1	465.035	HORVU5Hr1G108990.2	1	HORVU5Hr1G108990.2 HORVU5Hr1G108990	chr5H:629052727-629054625	HC_G	60S ribosomal protein L7-4	none	PF00327, PF08079	IPR005998, IPR012988, IPR016082, IPR018038	3	NA	1.75722e-13	0.000347242	0.932084	0.690637	0.40099	0.750318	0.89898	0.0470997	1.91613e-13	0.00582803	0.999981	0.968725	0.615611	0.987073	0.999388	0.366538	0.0389744	0.258478	0	1.42501	483
	uL5_RPL11A	AT2G42740	sp|P42795|RL111_ARATH 60S ribosomal protein L11-1 OS=Arabidopsis thaliana OX=3702 GN=RPL11A PE=2 SV=2	462.11	HORVU3Hr1G026060.1;HORVU1Hr1G028820.1;HORVU0Hr1G003140.1;HORVU2Hr1G029090.3;HORVU7Hr1G044560.1;HORVU2Hr1G042010.2;HORVU2Hr1G041980.1	2	HORVU1Hr1G028820.1 HORVU1Hr1G028820	chr1H:158586780-158588899	HC_G	50S ribosomal protein L5	GO:0003735, GO:0005622, GO:0005840, GO:0006412	PF00281, PF00673	IPR002132, IPR020929, IPR022803, IPR031309, IPR031310	3	X410	3.97583e-17	0.000939536	0.354994	0.141172	0.853753	0.651908	0.87879	0.0847128	6.57083e-17	0.0118615	0.999981	0.835875	0.919041	0.987073	0.999388	0.412601	0	0.101333	0	1.08405	423
	uL14_RPL23A,uL14_RPL23B,uL14_RPL23C	AT1G04480,AT2G33370,AT3G04400	sp|P49690|RL23_ARATH 60S ribosomal protein L23 OS=Arabidopsis thaliana OX=3702 GN=RPL23A PE=2 SV=3	460.459	HORVU6Hr1G090170.1;HORVU1Hr1G039160.1	1	HORVU6Hr1G090170.1 HORVU6Hr1G090170	chr6H:571460862-571463245	HC_G	50S ribosomal protein L14	GO:0003735, GO:0005840, GO:0006412	PF00238	IPR000218, IPR019972, IPR023571	3	NA	1.02226e-16	0.000234305	0.238659	0.403239	0.822077	0.80045	0.641682	0.202913	1.53989e-16	0.0044092	0.999981	0.877866	0.903158	0.987073	0.999388	0.542386	0	0.719556	0	1.00078	368
	eL15_RPL15A	AT4G16720	sp|O23515|RL151_ARATH 60S ribosomal protein L15-1 OS=Arabidopsis thaliana OX=3702 GN=RPL15A PE=2 SV=1	454.699	HORVU5Hr1G048830.1;HORVU2Hr1G052650.1	1	HORVU5Hr1G048830.1 HORVU5Hr1G048830	chr5H:378885026-378887021	HC_G	60S ribosomal protein L15-1	GO:0003735, GO:0005622, GO:0005840, GO:0006412	PF00827	IPR000439, IPR012678, IPR020925, IPR024794	3	NA	2.20334e-17	0.000311773	0.490346	0.409555	0.149713	0.843587	0.846687	0.503162	3.87887e-17	0.00552549	0.999981	0.881161	0.374752	0.987073	0.999388	0.749749	0	0.719228	0	0.586979	382
	eS31_RPS27aB	AT2G47110	sp|P59232|R27AB_ARATH Ubiquitin-40S ribosomal protein S27a-2 OS=Arabidopsis thaliana OX=3702 GN=RPS27AB PE=2 SV=2	443.13	HORVU1Hr1G023660.1;HORVU1Hr1G043930.8;HORVU7Hr1G103170.9;HORVU2Hr1G104440.1;HORVU6Hr1G026200.5;HORVU0Hr1G038500.2;HORVU6Hr1G014970.1;HORVU7Hr1G103550.4;HORVU6Hr1G014960.1;HORVU6Hr1G016150.3;HORVU1Hr1G087690.8;HORVU6Hr1G020140.6;HORVU5Hr1G019590.12;HORVU5Hr1G019600.6;HORVU7Hr1G103160.4;HORVU2Hr1G104410.26;HORVU7Hr1G102840.1;HORVU6Hr1G021700.4;HORVU7Hr1G103330.1;HORVU7Hr1G107010.1;HORVU7Hr1G109650.…	1	HORVU1Hr1G023660.1 HORVU1Hr1G023660	chr1H:104959326-104960686	HC_G	ubiquitin 5	GO:0003735, GO:0005515, GO:0005840, GO:0006412	PF00240, PF01599	IPR000626, IPR002906, IPR011332, IPR019954, IPR019956, IPR029071	5	X996	3.81449e-18	0.407176	0.26815	0.141897	0.795024	0.691516	0.746245	0.303842	8.78146e-18	0.618291	0.999981	0.835875	0.885975	0.987073	0.999388	0.619063	0	1.61423	0	0.574791	1847
	uS2_RPSaA	AT1G72370	sp|Q08682|RSSA1_ARATH 40S ribosomal protein Sa-1 OS=Arabidopsis thaliana OX=3702 GN=RPSaA PE=1 SV=3	430.357	HORVU2Hr1G030880.1	1	HORVU2Hr1G030880.1 HORVU2Hr1G030880	chr2H:115448549-115451096	HC_G	40s ribosomal protein SA	GO:0003735, GO:0005622, GO:0005840, GO:0006412, GO:0015935	PF00318, PF16122	IPR001865, IPR005707, IPR018130, IPR023591, IPR027498, IPR032281	3	NA	1.74752e-15	0.000816233	0.561206	0.10209	0.772659	0.795471	0.238173	0.0504491	2.20347e-15	0.01056	0.999981	0.835875	0.873197	0.987073	0.999388	0.370866	0.154256	0.35123	0	0.779144	361
	eL15_RPL15A	AT4G16720	sp|O23515|RL151_ARATH 60S ribosomal protein L15-1 OS=Arabidopsis thaliana OX=3702 GN=RPL15A PE=2 SV=1	425.386	HORVU5Hr1G048830.1;HORVU2Hr1G052650.1	2	HORVU2Hr1G052650.1 HORVU2Hr1G052650	chr2H:315819990-315832035	HC_G	60S ribosomal protein L15-1	GO:0003735, GO:0005622, GO:0005840, GO:0006412	PF00827	IPR000439, IPR012678, IPR020925, IPR024794	3	NA	2.20334e-17	0.000311773	0.490346	0.409555	0.149713	0.843587	0.846687	0.503162	3.87887e-17	0.00552549	0.999981	0.881161	0.374752	0.987073	0.999388	0.749749	0	0.719228	0	0.586979	382
	uL22_RPL17B	AT1G67430	sp|P51413|RL172_ARATH 60S ribosomal protein L17-2 OS=Arabidopsis thaliana OX=3702 GN=RPL17B PE=2 SV=2	419.023	HORVU7Hr1G054010.1	1	HORVU7Hr1G054010.1 HORVU7Hr1G054010	chr7H:213651429-213654111	HC_G	60S ribosomal protein L17-2	GO:0003735, GO:0005622, GO:0005840, GO:0006412, GO:0015934	PF00237	IPR001063, IPR005721, IPR018260	3	X151	1.89603e-17	0.00574072	0.482416	0.245053	0.337167	0.546945	0.881772	0.0315347	3.39809e-17	0.0436084	0.999981	0.840832	0.560722	0.987073	0.999388	0.350134	0.188923	1.21844	0	0.680057	425
	uL11_RPL12C	AT5G60670	sp|Q9FF52|RL123_ARATH 60S ribosomal protein L12-3 OS=Arabidopsis thaliana OX=3702 GN=RPL12C PE=2 SV=1	414.867	HORVU6Hr1G067870.1	1	HORVU6Hr1G067870.1 HORVU6Hr1G067870	chr6H:471244933-471246184	HC_G	60S ribosomal protein L12-1	GO:0003735, GO:0005840, GO:0006412	PF00298, PF03946	IPR000911, IPR020783, IPR020784, IPR020785	3	NA	1.53252e-15	4.16251e-05	0.40877	0.164205	0.545168	0.598266	0.633315	0.00844095	1.9472e-15	0.00126093	0.999981	0.835875	0.728455	0.987073	0.999388	0.327612	0.0742564	1.29782	0	1.03993	440
	AtTIF3C1	AT3G56150	sp|O49160|EIF3C_ARATH Eukaryotic translation initiation factor 3 subunit C OS=Arabidopsis thaliana OX=3702 GN=TIF3C1 PE=1 SV=2	404.824	HORVU5Hr1G063770.2	1	HORVU5Hr1G063770.2 HORVU5Hr1G063770	chr5H:494235084-494239882	HC_G	eukaryotic translation initiation factor 3 subunit C2	GO:0003723, GO:0003743, GO:0005515, GO:0005852, GO:0006413, GO:0031369	PF01399, PF05470	IPR000717, IPR008905, IPR011991, IPR027516	3	NA	9.82883e-17	0.0341249	0.79755	0.925149	0.682283	0.750827	0.959064	0.0642895	1.48689e-16	0.142464	0.999981	0.995195	0.817012	0.987073	0.999388	0.379323	0	1.77552	0	0.709368	251
	eS6_RPS6B	AT5G10360	sp|P51430|RS62_ARATH 40S ribosomal protein S6-2 OS=Arabidopsis thaliana OX=3702 GN=RPS6B PE=1 SV=3	404.787	HORVU2Hr1G010870.8;HORVU2Hr1G010890.2	2	HORVU2Hr1G010890.2 HORVU2Hr1G010890	chr2H:21428487-21429892	HC_G	40S ribosomal protein S6	GO:0003735, GO:0005622, GO:0005840, GO:0006412	PF01092	IPR001377, IPR014401, IPR018282	3	X471	5.54975e-17	0.0344589	0.147047	0.0594277	0.876603	0.258805	0.299492	0.267798	8.83125e-17	0.143377	0.999981	0.835875	0.931742	0.987073	0.999388	0.588161	0	1.1347	0	1.03665	378
	eL24_RPL24B	AT3G53020	sp|P38666|RL242_ARATH 60S ribosomal protein L24-2 OS=Arabidopsis thaliana OX=3702 GN=RPL24B PE=1 SV=2	402.919	HORVU3Hr1G080130.4	1	HORVU3Hr1G080130.4 HORVU3Hr1G080130	chr3H:587003525-587006162	HC_G	60S ribosomal protein L24	none	PF01246	IPR000988, IPR011017, IPR023441, IPR023442	3	NA	2.67276e-15	0.00793805	0.616362	0.53662	0.309308	0.462215	0.576942	0.774481	3.30799e-15	0.0547623	0.999981	0.923906	0.540971	0.987073	0.999388	0.897048	0	0.0985252	0	0.872637	384
	tRNA-R	AT1G69410	sp|O23247|SYRM_ARATH Arginine--tRNA ligase, chloroplastic/mitochondrial OS=Arabidopsis thaliana OX=3702 GN=EMB1027 PE=1 SV=1	401.74	HORVU1Hr1G024170.2	1	HORVU1Hr1G024170.2 HORVU1Hr1G024170	chr1H:108166411-108175356	HC_G	Arginine--tRNA ligase	GO:0000166, GO:0004812, GO:0004814, GO:0005524, GO:0005737, GO:0006418, GO:0006420	PF00750, PF03485, PF05746	IPR001278, IPR001412, IPR005148, IPR008909, IPR009080, IPR014729	5	NA	4.24028e-17	0.582007	0.736509	0.332169	0.0610086	0.684824	0.290462	0.0957267	6.94828e-17	0.746749	0.999981	0.856834	0.227301	0.987073	0.999388	0.427614	0	0.955729	0	0.486612	2327
	uL6_RPL9B,uL6_RPL9C	AT1G33120,AT1G33140	sp|P49209|RL91_ARATH 60S ribosomal protein L9-1 OS=Arabidopsis thaliana OX=3702 GN=RPL9B PE=1 SV=3	401.713	HORVU7Hr1G002060.1;HORVU0Hr1G006020.2;HORVU3Hr1G001140.5	1	HORVU7Hr1G002060.1 HORVU7Hr1G002060	chr7H:4055831-4057852	HC_G	Ribosomal protein L6 family	GO:0003735, GO:0005622, GO:0005840, GO:0006412, GO:0019843	PF00347	IPR000702, IPR002359, IPR020040	3	X410	2.39848e-17	3.52313e-05	0.961604	0.324466	0.330735	0.680967	0.647206	0.0979977	4.1927e-17	0.00112198	0.999981	0.856834	0.558981	0.987073	0.999388	0.431606	0.527795	1.13836	0	1.45269	421
	AtTIF3D1	AT4G20980	sp|P56820|EIF3D_ARATH Eukaryotic translation initiation factor 3 subunit D OS=Arabidopsis thaliana OX=3702 GN=TIF3D1 PE=1 SV=1	400.774	HORVU1Hr1G088760.2	1	HORVU1Hr1G088760.2 HORVU1Hr1G088760	chr1H:542658025-542660410	HC_G	Eukaryotic translation initiation factor 3 subunit D	GO:0003743, GO:0005737, GO:0005852	PF05091	IPR007783	3	NA	1.00941e-18	0.101955	0.623798	0.395777	0.257271	0.413497	0.699764	0.0499296	3.04664e-18	0.271571	0.999981	0.875227	0.495396	0.987073	0.999388	0.370866	0	1.21155	0	1.0895	319
	uS4_RPS9C	AT5G39850	sp|Q9FLF0|RS92_ARATH 40S ribosomal protein S9-2 OS=Arabidopsis thaliana OX=3702 GN=RPS9C PE=1 SV=1	400.03	HORVU2Hr1G028510.1	1	HORVU2Hr1G028510.1 HORVU2Hr1G028510	chr2H:97111015-97114741	HC_G	Ribosomal protein S4	GO:0003723, GO:0003735, GO:0005622, GO:0006412, GO:0015935, GO:0019843	PF00163, PF01479	IPR001912, IPR002942, IPR005710	3	NA	2.37794e-13	0.0373279	0.661515	0.517334	0.716123	0.834905	0.769345	0.284362	2.58164e-13	0.151038	0.999981	0.91987	0.842277	0.987073	0.999388	0.603723	0	0.173866	0	1.7698	202
	uS7_RPS5A	AT2G37270	sp|Q9ZUT9|RS51_ARATH 40S ribosomal protein S5-1 OS=Arabidopsis thaliana OX=3702 GN=RPS5A PE=1 SV=1	397.017	HORVU3Hr1G015190.2	1	HORVU3Hr1G015190.2 HORVU3Hr1G015190	chr3H:35366284-35368003	HC_G	30S ribosomal protein S7	GO:0003723, GO:0003735, GO:0006412, GO:0015935	PF00177	IPR000235, IPR005716, IPR020606, IPR023798	3	NA	6.37614e-12	4.97133e-05	0.77535	0.431448	0.571442	0.766595	0.823105	0.248319	6.66316e-12	0.00140327	0.999981	0.891803	0.739688	0.987073	0.999388	0.573257	0.227692	0.510132	0	0.93826	492
	uL22_RPL17B	AT1G67430	sp|P51413|RL172_ARATH 60S ribosomal protein L17-2 OS=Arabidopsis thaliana OX=3702 GN=RPL17B PE=2 SV=2	392.263	HORVU5Hr1G052280.1	1	HORVU5Hr1G052280.1 HORVU5Hr1G052280	chr5H:409085494-409088446	HC_G	60S ribosomal protein L17-1	GO:0003735, GO:0005622, GO:0005840, GO:0006412, GO:0015934	PF00237	IPR001063, IPR005721, IPR018260	3	NA	1.21173e-15	0.00130096	0.118512	0.143122	0.86083	0.199339	0.586898	0.0612437	1.56198e-15	0.0153155	0.999981	0.835875	0.922875	0.987073	0.999388	0.379323	0.0777436	0.25162	0	0.898997	360
	IF5A1	AT1G13950	sp|Q9XI91|IF5A1_ARATH Eukaryotic translation initiation factor 5A-1 OS=Arabidopsis thaliana OX=3702 GN=ELF5A-1 PE=1 SV=1	372.147	HORVU5Hr1G028360.3	1	HORVU5Hr1G028360.3 HORVU5Hr1G028360	chr5H:167332007-167339562	HC_G	Eukaryotic translation initiation factor 5A-3	GO:0003723, GO:0003746, GO:0006452, GO:0043022, GO:0045901, GO:0045905	PF01287	IPR001884, IPR008991, IPR012340, IPR014722, IPR019769, IPR020189	5	NA	4.01703e-19	0.402914	0.415156	0.184258	0.391038	0.367558	0.303806	0.0964006	1.54155e-18	0.614598	0.999981	0.835875	0.607998	0.987073	0.999388	0.428164	0	0.0301206	0	0.86122	1596
	IF5A3	AT1G69410	sp|Q9C505|IF5A3_ARATH Eukaryotic translation initiation factor 5A-3 OS=Arabidopsis thaliana OX=3702 GN=ELF5A-3 PE=2 SV=1	371.154	HORVU2Hr1G034400.4	1	HORVU2Hr1G034400.4 HORVU2Hr1G034400	chr2H:140145591-140148669	HC_G	Eukaryotic translation initiation factor 5A	GO:0003723, GO:0003746, GO:0006452, GO:0043022, GO:0045901, GO:0045905	PF01287	IPR001884, IPR008991, IPR012340, IPR014722, IPR019769, IPR020189	5	NA	1.32194e-18	0.0547991	0.305465	0.0621504	0.0190793	0.34796	0.238782	0.0143281	3.75708e-18	0.187753	0.999981	0.835875	0.112067	0.987073	0.999388	0.327612	0	1.48223	0	0.768589	2114
	RPS12_RPS7	AT2G07675,ATMG00980	sp|P92532|RT12_ARATH Ribosomal protein S12, mitochondrial OS=Arabidopsis thaliana OX=3702 GN=RPS12 PE=2 SV=2	370.153	HORVU3Hr1G004730.1;HORVU3Hr1G004570.1;HORVU0Hr1G037680.1;HORVU7Hr1G076970.1;HORVU6Hr1G049530.1;HORVU5Hr1G064860.1;HORVU2Hr1G121890.1;HORVU2Hr1G070510.1;HORVU2Hr1G030350.1;HORVU1Hr1G014050.1;HORVU0Hr1G034790.1;HORVU0Hr1G032570.1;HORVU0Hr1G031300.1;HORVU0Hr1G024920.1;HORVU3Hr1G044580.1	1	HORVU3Hr1G004730.1 HORVU3Hr1G004730	chr3H:11892648-11893025	HC_G	30S ribosomal protein S12	GO:0003735, GO:0005622, GO:0005840, GO:0006412, GO:0015935	PF00164	IPR005679, IPR006032, IPR012340	4	NA	2.77505e-07	0.0557151	0.74745	0.232613	0.542086	0.425106	0.50074	0.091298	2.78852e-07	0.188551	0.999981	0.840832	0.727074	0.987073	0.999388	0.423165	0	0.361696	0	0.944106	1173
	RPS12_RPS7	AT2G07675,ATMG00980	sp|P92532|RT12_ARATH Ribosomal protein S12, mitochondrial OS=Arabidopsis thaliana OX=3702 GN=RPS12 PE=2 SV=2	370.153	HORVU3Hr1G004730.1;HORVU3Hr1G004570.1;HORVU0Hr1G037680.1;HORVU7Hr1G076970.1;HORVU6Hr1G049530.1;HORVU5Hr1G064860.1;HORVU2Hr1G121890.1;HORVU2Hr1G070510.1;HORVU2Hr1G030350.1;HORVU1Hr1G014050.1;HORVU0Hr1G034790.1;HORVU0Hr1G032570.1;HORVU0Hr1G031300.1;HORVU0Hr1G024920.1;HORVU3Hr1G044580.1	2	HORVU3Hr1G004570.1 HORVU3Hr1G004570	chr3H:11818480-11819987	HC_G	30S ribosomal protein S12	GO:0003735, GO:0005622, GO:0005840, GO:0006412, GO:0015935	PF00164	IPR005679, IPR006032, IPR012340	4	NA	2.77505e-07	0.0557151	0.74745	0.232613	0.542086	0.425106	0.50074	0.091298	2.78852e-07	0.188551	0.999981	0.840832	0.727074	0.987073	0.999388	0.423165	0	0.361696	0	0.944106	1173
	RPS12_RPS7	AT2G07675,ATMG00980	sp|P92532|RT12_ARATH Ribosomal protein S12, mitochondrial OS=Arabidopsis thaliana OX=3702 GN=RPS12 PE=2 SV=2	370.153	HORVU3Hr1G004730.1;HORVU3Hr1G004570.1;HORVU0Hr1G037680.1;HORVU7Hr1G076970.1;HORVU6Hr1G049530.1;HORVU5Hr1G064860.1;HORVU2Hr1G121890.1;HORVU2Hr1G070510.1;HORVU2Hr1G030350.1;HORVU1Hr1G014050.1;HORVU0Hr1G034790.1;HORVU0Hr1G032570.1;HORVU0Hr1G031300.1;HORVU0Hr1G024920.1;HORVU3Hr1G044580.1	3	HORVU0Hr1G037680.1 HORVU0Hr1G037680	chrUn:236001668-236003427	HC_G	30S ribosomal protein S12	GO:0003735, GO:0005622, GO:0005840, GO:0006412, GO:0015935	PF00164	IPR005679, IPR006032, IPR012340	4	NA	2.77505e-07	0.0557151	0.74745	0.232613	0.542086	0.425106	0.50074	0.091298	2.78852e-07	0.188551	0.999981	0.840832	0.727074	0.987073	0.999388	0.423165	0	0.361696	0	0.944106	1173
	MRF4	AT5G57870	sp|Q9STL9|MRF4_ARATH MA3 DOMAIN-CONTAINING TRANSLATION REGULATORY FACTOR 4 OS=Arabidopsis thaliana OX=3702 GN=MRF4 PE=1 SV=1	367.779	HORVU7Hr1G074850.3	1	HORVU7Hr1G074850.3 HORVU7Hr1G074850	chr7H:430314594-430319895	HC_G	eukaryotic translation initiation factor 4G	GO:0005488	PF02847	IPR003891, IPR016021, IPR016024	5	NA	1.37874e-19	0.460039	0.84381	0.468671	0.25299	0.379172	0.454537	0.125954	7.33358e-19	0.66271	0.999981	0.902441	0.491344	0.987073	0.999388	0.469774	0	0.485014	0	1.01215	1436
	IF5A2	AT1G26630	sp|Q93VP3|IF5A2_ARATH Eukaryotic translation initiation factor 5A-2 OS=Arabidopsis thaliana OX=3702 GN=ELF5A-2 PE=1 SV=1	364.908	HORVU2Hr1G063210.2	1	HORVU2Hr1G063210.2 HORVU2Hr1G063210	chr2H:426004357-426006246	HC_G	Eukaryotic translation initiation factor 5A-1	GO:0003723, GO:0003746, GO:0006452, GO:0043022, GO:0045901, GO:0045905	PF01287	IPR001884, IPR008991, IPR012340, IPR014722, IPR019769, IPR020189	3	NA	2.32241e-17	0.558645	0.126295	0.0155327	0.915386	0.2966	0.369791	0.0104489	4.07406e-17	0.726914	0.999981	0.835875	0.954583	0.987073	0.999388	0.327612	0	1.64049	0	0.994488	587
	eL32_RPL32A	AT4G18100	sp|P49211|RL321_ARATH 60S ribosomal protein L32-1 OS=Arabidopsis thaliana OX=3702 GN=RPL32A PE=2 SV=2	362.934	HORVU7Hr1G052960.1	1	HORVU7Hr1G052960.1 HORVU7Hr1G052960	chr7H:204783549-204786127	HC_G	60S ribosomal protein L32-1	GO:0003735, GO:0005622, GO:0005840, GO:0006412	PF01655	IPR001515	3	NA	2.32277e-13	0.10458	0.82116	0.685435	0.484189	0.769031	0.934759	0.108282	2.52395e-13	0.275715	0.999981	0.968498	0.680659	0.987073	0.999388	0.450961	0	0.972093	0	1.64728	608
	uS12_RPS23B	AT5G02960	sp|P49201|RS232_ARATH 40S ribosomal protein S23-2 OS=Arabidopsis thaliana OX=3702 GN=RPS23B PE=2 SV=2	358.523	HORVU5Hr1G112390.1;HORVU5Hr1G066080.1;HORVU1Hr1G071570.1;HORVU3Hr1G087380.1	4	HORVU3Hr1G087380.1 HORVU3Hr1G087380	chr3H:621112310-621113917	HC_G	30S ribosomal protein S12	GO:0003735, GO:0005622, GO:0005840, GO:0006412, GO:0015935	PF00164	IPR005680, IPR006032, IPR012340	3	NA	1.31156e-13	0.229855	0.439656	0.463944	0.920648	0.428212	0.939801	0.242833	1.43965e-13	0.439187	0.999981	0.90111	0.956858	0.987073	0.999388	0.569196	0	0.714127	0	0.758007	170
	uS11_RPS14C	AT3G52580	sp|P42036|RS143_ARATH 40S ribosomal protein S14-3 OS=Arabidopsis thaliana OX=3702 GN=RPS14C PE=2 SV=2	355.93	HORVU2Hr1G073150.1;HORVU0Hr1G004130.1	2	HORVU0Hr1G004130.1 HORVU0Hr1G004130	chrUn:21837754-21840749	HC_G	30S ribosomal protein S11	GO:0003735, GO:0005840, GO:0006412	PF00411	IPR001971, IPR018102	3	X59	6.63746e-16	0.00284595	0.458595	0.452854	0.658844	0.318331	0.862108	0.244165	8.81211e-16	0.0271619	0.999981	0.898555	0.802632	0.987073	0.999388	0.571097	0	0.145248	0	0.956305	436
	eL24_RPL24A	AT2G36620	sp|Q42347|RL241_ARATH 60S ribosomal protein L24-1 OS=Arabidopsis thaliana OX=3702 GN=RPL24A PE=1 SV=2	348.416	HORVU5Hr1G111510.1	1	HORVU5Hr1G111510.1 HORVU5Hr1G111510	chr5H:636519839-636522284	HC_G	60S ribosomal protein L24	none	PF01246	IPR000988, IPR011017, IPR023441, IPR023442	3	NA	4.26195e-17	0.000342585	0.998715	0.675637	0.0495694	0.517688	0.998776	0.785742	6.9741e-17	0.00582803	0.999981	0.965323	0.200212	0.987073	0.999399	0.904022	0.113231	1.20605	0	1.16817	534
	uL10_RPP0A	AT2G40010	sp|Q8VZT0|NLAL1_ARATH Putative H/ACA ribonucleoprotein complex subunit 1-like protein 1 OS=Arabidopsis thaliana OX=3702 GN=At3g03920 PE=2 SV=1	337.261	HORVU4Hr1G047580.2	1	HORVU4Hr1G047580.2 HORVU4Hr1G047580	chr4H:381659429-381661770	HC_G	H/ACA ribonucleoprotein complex subunit 1-like protein 2	GO:0001522, GO:0031429, GO:0042254	PF04410	IPR007504, IPR009000, IPR021154	3	NA	8.31402e-17	3.89448e-05	0.30439	0.343531	0.744228	0.38515	0.686313	0.0747016	1.27956e-16	0.00120727	0.999981	0.856834	0.857055	0.987073	0.999388	0.395658	0.229128	1.26736	0	0.880693	461
	IF2B	AT5G20920	sp|Q41969|IF2B_ARATH Eukaryotic translation initiation factor 2 subunit beta OS=Arabidopsis thaliana OX=3702 GN=EIF2B PE=1 SV=3	336.3	HORVU4Hr1G050630.4	1	HORVU4Hr1G050630.4 HORVU4Hr1G050630	chr4H:412884166-412889718	HC_G	eukaryotic translation initiation factor 2 beta subunit	GO:0003743, GO:0006413	PF01873	IPR002735, IPR016189, IPR016190	3	NA	1.44012e-16	0.374655	0.926959	0.151236	0.691741	0.571305	0.448552	0.0769747	2.11547e-16	0.587157	0.999981	0.835875	0.824908	0.987073	0.999388	0.401692	0	1.38121	0	0.706259	270
	eL14_RPL14A	AT2G20450	sp|Q9SIM4|RL141_ARATH 60S ribosomal protein L14-1 OS=Arabidopsis thaliana OX=3702 GN=RPL14A PE=2 SV=1	335.314	HORVU6Hr1G058560.1	1	HORVU6Hr1G058560.1 HORVU6Hr1G058560	chr6H:383270846-383276080	HC_G	60S ribosomal protein L14-1	GO:0003735, GO:0005622, GO:0005840, GO:0006412	PF01929	IPR002784, IPR008991, IPR014722	3	X91	3.5411e-16	0.000982283	0.59738	0.257115	0.107992	0.911883	0.8209	0.0468317	4.89216e-16	0.0122	0.999981	0.840832	0.31088	0.987073	0.999388	0.365818	0.225436	1.05448	0	0.525561	481
	tRNA-E	AT1G69410	sp|O82462|SYEC_ARATH Glutamate--tRNA ligase, cytoplasmic OS=Arabidopsis thaliana OX=3702 GN=At5g26710 PE=1 SV=1	335.211	HORVU3Hr1G038360.1;HORVU1Hr1G078370.2	2	HORVU1Hr1G078370.2 HORVU1Hr1G078370	chr1H:520099417-520103471	HC_G	Glutamine--tRNA ligase	GO:0000166, GO:0004812, GO:0004818, GO:0005524, GO:0005737, GO:0006412, GO:0006418, GO:0006424, GO:0016876, GO:0043039	PF00749, PF03950, PF14497	IPR000924, IPR001412, IPR004046, IPR004526, IPR010987, IPR011035, IPR012336, IPR014729, IPR020056, IPR020058, IPR020059, IPR020061	5	NA	1.07878e-17	0.900981	0.92663	0.303665	0.252755	0.507117	0.442033	0.40168	2.09025e-17	0.945869	0.999981	0.842797	0.49127	0.987073	0.999388	0.684813	0	0.127534	0	0.808142	1753
	eL21_RPL21E,eL21_RPL21G	AT1G57660,AT1G57860	sp|Q9FDZ9|RL212_ARATH 60S ribosomal protein L21-2 OS=Arabidopsis thaliana OX=3702 GN=RPL21E PE=2 SV=1	333.175	HORVU4Hr1G084420.2	1	HORVU4Hr1G084420.2 HORVU4Hr1G084420	chr4H:628801849-628803652	HC_G	60S ribosomal protein L21-2	GO:0003735, GO:0005622, GO:0005840, GO:0006412	PF01157	IPR001147, IPR008991, IPR018259	3	NA	1.51205e-15	0.0087393	0.617594	0.353035	0.870916	0.664765	0.939137	0.12238	1.92317e-15	0.0583314	0.999981	0.856834	0.927682	0.987073	0.999388	0.466243	0	0.162064	0	0.753108	407
	uS13_RPS18A,uS13_RPS18B,uS13_RPS18C	AT1G22780,AT1G34030,AT4G09800	sp|P34788|RS18_ARATH 40S ribosomal protein S18 OS=Arabidopsis thaliana OX=3702 GN=RPS18A PE=1 SV=1	332.003	HORVU5Hr1G104720.1	1	HORVU5Hr1G104720.1 HORVU5Hr1G104720	chr5H:619903649-619905479	HC_G	30S ribosomal protein S13	GO:0003676, GO:0003723, GO:0003735, GO:0005622, GO:0005840, GO:0006412	PF00416	IPR001892, IPR010979, IPR018269, IPR027437	3	NA	3.00014e-16	0.00395012	0.0782097	0.0841582	0.443707	0.37582	0.57818	0.0438237	4.18907e-16	0.0336031	0.999981	0.835875	0.649098	0.987073	0.999388	0.357416	0.0724103	0.608694	0	1.6263	430
	uS8_RPS15aA,uS8_RPS15aF	AT1G07770,AT5G59850	sp|P42798|R15A1_ARATH 40S ribosomal protein S15a-1 OS=Arabidopsis thaliana OX=3702 GN=RPS15AA PE=2 SV=2	327.978	HORVU1Hr1G072060.1;HORVU3Hr1G086930.1	2	HORVU3Hr1G086930.1 HORVU3Hr1G086930	chr3H:619313438-619316091	HC_G	30S ribosomal protein S8	GO:0003735, GO:0005840, GO:0006412	PF00410	IPR000630	3	NA	2.67278e-18	0.00171376	0.896685	0.80051	0.441482	0.474143	0.835788	0.1335	6.59958e-18	0.0189199	0.999981	0.981203	0.646604	0.987073	0.999388	0.474024	0	0.387889	0	0.72556	210
	uS15_RPS13B	AT4G00100	sp|P59224|RS132_ARATH 40S ribosomal protein S13-2 OS=Arabidopsis thaliana OX=3702 GN=RPS13B PE=2 SV=1	322.249	HORVU7Hr1G075250.1	1	HORVU7Hr1G075250.1 HORVU7Hr1G075250	chr7H:435469556-435471602	HC_G	40S ribosomal protein S13-1	GO:0003735, GO:0005622, GO:0005840, GO:0006412	PF00312, PF08069	IPR000589, IPR009068, IPR012606, IPR023029	3	NA	1.75666e-16	0.00100175	0.48337	0.330265	0.491393	0.600457	0.880502	0.166561	2.53694e-16	0.0123185	0.999981	0.856834	0.685065	0.987073	0.999388	0.511765	0.0387692	0.476032	0	0.778918	359
	eL18_RPL18B	AT3G05590	sp|P42791|RL182_ARATH 60S ribosomal protein L18-2 OS=Arabidopsis thaliana OX=3702 GN=RPL18B PE=1 SV=2	313.138	HORVU1Hr1G022570.1	1	HORVU1Hr1G022570.1 HORVU1Hr1G022570	chr1H:96478835-96482565	HC_G	60S ribosomal protein L18-2	GO:0003735, GO:0005622, GO:0005840, GO:0006412	none	IPR021131, IPR021132	3	NA	1.85201e-16	0.0059394	0.391781	0.752245	0.612412	0.470115	0.682572	0.166013	2.6638e-16	0.0444382	0.999981	0.968725	0.771239	0.987073	0.999388	0.511592	0	1.4867	0	0.501505	154
	eL40_RPL40A	AT2G36170	sp|B9DHA6|RL40A_ARATH Ubiquitin-60S ribosomal protein L40-1 OS=Arabidopsis thaliana OX=3702 GN=RPL40A PE=2 SV=1	305.477	HORVU1Hr1G023660.1;HORVU1Hr1G043930.8;HORVU7Hr1G103170.9;HORVU2Hr1G104440.1;HORVU6Hr1G026200.5;HORVU0Hr1G038500.2;HORVU6Hr1G014970.1;HORVU7Hr1G103550.4;HORVU6Hr1G014960.1;HORVU6Hr1G016150.3;HORVU1Hr1G087690.8;HORVU6Hr1G020140.6;HORVU5Hr1G019590.12;HORVU5Hr1G019600.6;HORVU7Hr1G103160.4;HORVU2Hr1G104410.26;HORVU7Hr1G102840.1;HORVU6Hr1G021700.4;HORVU7Hr1G103330.1;HORVU7Hr1G107010.1;HORVU7Hr1G109650.…	21	HORVU7Hr1G109650.2 HORVU7Hr1G109650	chr7H:628423843-628424545	HC_G	ubiquitin 4	GO:0003735, GO:0005515, GO:0005840, GO:0006412	PF00240, PF01020	IPR000626, IPR001975, IPR011332, IPR019954, IPR019956, IPR029071	5	X996	3.81449e-18	0.407176	0.26815	0.141897	0.795024	0.691516	0.746245	0.303842	8.78146e-18	0.618291	0.999981	0.835875	0.885975	0.987073	0.999388	0.619063	0	1.61423	0	0.574791	1847
	eS27_RPS27B	AT3G61110	sp|Q9M2F1|RS272_ARATH 40S ribosomal protein S27-2 OS=Arabidopsis thaliana OX=3702 GN=RPS27B PE=2 SV=2	303.818	HORVU4Hr1G014130.1;HORVU4Hr1G074270.1;HORVU7Hr1G112740.4	1	HORVU4Hr1G014130.1 HORVU4Hr1G014130	chr4H:51276810-51278617	HC_G	40S ribosomal protein S27	GO:0003735, GO:0005622, GO:0005840, GO:0006412	PF01667	IPR000592, IPR011332, IPR023407	3	NA	3.94962e-15	0.00964037	0.321966	0.106356	0.895184	0.446974	0.743547	0.105195	4.81869e-15	0.0615596	0.999981	0.835875	0.940943	0.987073	0.999388	0.444603	0	0.123293	0	0.79081	408
	eS27_RPS27B	AT3G61110	sp|Q9M2F1|RS272_ARATH 40S ribosomal protein S27-2 OS=Arabidopsis thaliana OX=3702 GN=RPS27B PE=2 SV=2	303.818	HORVU4Hr1G014130.1;HORVU4Hr1G074270.1;HORVU7Hr1G112740.4	2	HORVU4Hr1G074270.1 HORVU4Hr1G074270	chr4H:593630884-593632513	HC_G	40S ribosomal protein S27	GO:0003735, GO:0005622, GO:0005840, GO:0006412	PF01667	IPR000592, IPR011332, IPR023407	3	NA	3.94962e-15	0.00964037	0.321966	0.106356	0.895184	0.446974	0.743547	0.105195	4.81869e-15	0.0615596	0.999981	0.835875	0.940943	0.987073	0.999388	0.444603	0	0.123293	0	0.79081	408
	AtTIF3E1	AT3G57290	sp|Q9C5Z3|EIF3E_ARATH Eukaryotic translation initiation factor 3 subunit E OS=Arabidopsis thaliana OX=3702 GN=TIF3E1 PE=1 SV=1	303.739	HORVU5Hr1G072560.1	1	HORVU5Hr1G072560.1 HORVU5Hr1G072560	chr5H:535815189-535817106	HC_G	Eukaryotic translation initiation factor 3 subunit E	GO:0003743, GO:0005515, GO:0005737, GO:0005852	PF01399, PF09440	IPR000717, IPR011990, IPR011991, IPR016650, IPR019010	3	NA	3.50894e-16	0.0367323	0.471552	0.920139	0.994542	0.960137	0.561379	0.0246428	4.85042e-16	0.149334	0.999981	0.995195	0.997759	0.99798	0.999388	0.334261	0	1.38529	0	0.574462	226
	EF1B2	AT5G19510	sp|Q9SCX3|EF1B2_ARATH Elongation factor 1-beta 2 OS=Arabidopsis thaliana OX=3702 GN=At5g19510 PE=1 SV=1	299.565	HORVU2Hr1G022090.4	1	HORVU2Hr1G022090.4 HORVU2Hr1G022090	chr2H:63473690-63506992	HC_G	Elongation factor 1-beta	GO:0003746, GO:0005853, GO:0006414	PF00736	IPR001326, IPR010987, IPR014038, IPR014717	3	NA	2.92576e-17	0.0417464	0.0593821	0.0291185	0.283289	0.269756	0.444318	0.015178	5.01559e-17	0.162536	0.999981	0.835875	0.521647	0.987073	0.999388	0.327612	0	0.381029	0	0.983219	350
	eS7_RPS7B	AT3G02560	sp|Q9M885|RS72_ARATH 40S ribosomal protein S7-2 OS=Arabidopsis thaliana OX=3702 GN=RPS7B PE=2 SV=1	296.597	HORVU1Hr1G029870.1	1	HORVU1Hr1G029870.1 HORVU1Hr1G029870	chr1H:167317689-167319573	HC_G	40S ribosomal protein S7	GO:0003735, GO:0005622, GO:0005840, GO:0006412	PF01251	IPR000554	3	X151	3.82691e-14	0.00833503	0.400917	0.175817	0.610934	0.449929	0.405587	0.0179725	4.32289e-14	0.0565689	0.999981	0.835875	0.769944	0.987073	0.999388	0.327612	0.0377436	0.906723	0	0.458357	429
	eS27_RPS27B	AT3G61110	sp|Q9M2F1|RS272_ARATH 40S ribosomal protein S27-2 OS=Arabidopsis thaliana OX=3702 GN=RPS27B PE=2 SV=2	293.131	HORVU4Hr1G014130.1;HORVU4Hr1G074270.1;HORVU7Hr1G112740.4	3	HORVU7Hr1G112740.4 HORVU7Hr1G112740	chr7H:635735961-635738357	HC_G	40S ribosomal protein S27	GO:0003735, GO:0005622, GO:0005840, GO:0006412	PF01667	IPR000592, IPR011332, IPR023407	3	NA	3.94962e-15	0.00964037	0.321966	0.106356	0.895184	0.446974	0.743547	0.105195	4.81869e-15	0.0615596	0.999981	0.835875	0.940943	0.987073	0.999388	0.444603	0	0.123293	0	0.79081	408
	tRNA-D	AT1G69410	sp|Q9M084|SYDC2_ARATH Aspartate--tRNA ligase 2, cytoplasmic OS=Arabidopsis thaliana OX=3702 GN=IBI1 PE=1 SV=1	285.919	HORVU5Hr1G050160.1	1	HORVU5Hr1G050160.1 HORVU5Hr1G050160	chr5H:388730361-388736731	HC_G	Asparagine--tRNA ligase	GO:0000166, GO:0004812, GO:0004815, GO:0005524, GO:0005737, GO:0006418, GO:0006422	PF00152	IPR002312, IPR004364, IPR004523, IPR006195, IPR012340	5	X269	1.82692e-19	0.295524	0.439516	0.895109	0.337146	0.857234	0.994528	0.335219	8.87304e-19	0.503486	0.999981	0.99243	0.560722	0.987073	0.999399	0.642008	0	0.537323	0	0.587457	1481
	uL18_RPL5A	AT3G25520	sp|Q8LBI1|RL51_ARATH 60S ribosomal protein L5-1 OS=Arabidopsis thaliana OX=3702 GN=ATL5 PE=1 SV=2	284.819	HORVU2Hr1G073320.1	1	HORVU2Hr1G073320.1 HORVU2Hr1G073320	chr2H:527519962-527522797	HC_G	60S ribosomal protein L5-1	GO:0003735, GO:0005622, GO:0005840, GO:0006412, GO:0008097	PF00861, PF14204	IPR005484, IPR005485, IPR025607	3	NA	2.95024e-18	0.0162982	0.400424	0.270331	0.177834	0.60309	0.723357	0.0276641	7.13574e-18	0.0882022	0.999981	0.842221	0.411688	0.987073	0.999388	0.347059	0	0.0112792	0	1.05811	353
	TCTP1	AT5G57870	sp|P31265|TCTP1_ARATH Translationally-controlled tumor protein 1 OS=Arabidopsis thaliana OX=3702 GN=TCTP1 PE=1 SV=2	283.26	HORVU4Hr1G033200.1	1	HORVU4Hr1G033200.1 HORVU4Hr1G033200	chr4H:229702183-229704374	HC_G	translationally controlled tumor protein	none	PF00838	IPR011057, IPR011323, IPR018103, IPR018105	3	X405	2.05372e-10	0.390765	0.714606	0.287243	0.108075	0.80955	0.604126	0.234024	2.10195e-10	0.603274	0.999981	0.842221	0.31088	0.987073	0.999388	0.565897	0	1.27529	0	0.555247	594
	uL29_RPL35D	AT5G02610	sp|Q9LZ41|RL354_ARATH 60S ribosomal protein L35-4 OS=Arabidopsis thaliana OX=3702 GN=RPL35D PE=2 SV=1	281.958	HORVU2Hr1G068120.2	1	HORVU2Hr1G068120.2 HORVU2Hr1G068120	chr2H:478657505-478659202	HC_G	60S ribosomal protein L35-4	GO:0003735, GO:0005622, GO:0005840, GO:0006412	PF00831	IPR001854	3	NA	1.46815e-15	0.106479	0.586948	0.499441	0.562259	0.341	0.972368	0.0298836	1.87019e-15	0.276957	0.999981	0.910347	0.734693	0.987073	0.999388	0.350134	0	1.09135	0	0.599746	552
	eL22_RPL22B	AT3G05560	sp|Q9M9W1|RL222_ARATH 60S ribosomal protein L22-2 OS=Arabidopsis thaliana OX=3702 GN=RPL22B PE=2 SV=1	275.651	HORVU7Hr1G080630.1	1	HORVU7Hr1G080630.1 HORVU7Hr1G080630	chr7H:478521607-478523139	HC_G	60S ribosomal protein L22-2	GO:0003735, GO:0005622, GO:0005840, GO:0006412	PF01776	IPR002671	3	NA	6.51817e-17	0.00906447	0.182739	0.0957897	0.548214	0.55698	0.984153	0.0556548	1.0254e-16	0.0594094	0.999981	0.835875	0.72885	0.987073	0.999399	0.376509	0	0.587608	0	1.34907	432
	uL30_RPL7B	AT2G01250	sp|P60040|RL72_ARATH 60S ribosomal protein L7-2 OS=Arabidopsis thaliana OX=3702 GN=RPL7B PE=1 SV=1	275.035	HORVU2Hr1G100970.4	1	HORVU2Hr1G100970.4 HORVU2Hr1G100970	chr2H:692436366-692438591	HC_G	60S ribosomal protein L7-4	none	PF00327, PF08079	IPR005998, IPR012988, IPR016082, IPR018038	3	NA	1.96306e-14	0.00490999	0.610386	0.69593	0.202776	0.64494	0.99602	0.00387364	2.26697e-14	0.0391649	0.999981	0.968725	0.443004	0.987073	0.999399	0.307165	0.0773333	0.995768	0	1.18116	484
	uL6_RPL9B,uL6_RPL9C	AT1G33120,AT1G33140	sp|P49209|RL91_ARATH 60S ribosomal protein L9-1 OS=Arabidopsis thaliana OX=3702 GN=RPL9B PE=1 SV=3	271.713	HORVU7Hr1G002060.1;HORVU0Hr1G006020.2;HORVU3Hr1G001140.5	2	HORVU0Hr1G006020.2 HORVU0Hr1G006020	chrUn:32720893-32722691	HC_G	Ribosomal protein L6 family	GO:0003735, GO:0005622, GO:0005840, GO:0006412, GO:0019843	PF00347	IPR000702, IPR002359, IPR020040	3	X410	2.39848e-17	3.52313e-05	0.961604	0.324466	0.330735	0.680967	0.647206	0.0979977	4.1927e-17	0.00112198	0.999981	0.856834	0.558981	0.987073	0.999388	0.431606	0.527795	1.13836	0	1.45269	421
	eL33_RPL35aC	AT1G74270	sp|Q9C912|R35A3_ARATH 60S ribosomal protein L35a-3 OS=Arabidopsis thaliana OX=3702 GN=RPL35AC PE=3 SV=1	269.67	HORVU6Hr1G083120.2	1	HORVU6Hr1G083120.2 HORVU6Hr1G083120	chr6H:550448831-550450557	HC_G	60S ribosomal protein L35a-3	GO:0003735, GO:0005622, GO:0005840, GO:0006412	PF01247	IPR001780, IPR009000, IPR018266	3	NA	4.78274e-17	0.000320318	0.36788	0.243061	0.884491	0.716411	0.756411	0.202734	7.73459e-17	0.00552549	0.999981	0.840832	0.934927	0.987073	0.999388	0.542386	0	1.04646	0	1.19932	413
	uS10_RPS20A,uS10_RPS20C	AT3G45030,AT5G62300	sp|P49200|RS201_ARATH 40S ribosomal protein S20-1 OS=Arabidopsis thaliana OX=3702 GN=RPS20A PE=2 SV=2	269.589	HORVU7Hr1G028050.5;HORVU7Hr1G014140.4	1	HORVU7Hr1G028050.5 HORVU7Hr1G028050	chr7H:50144424-50146899	HC_G	30S ribosomal protein S10	GO:0003735, GO:0005840, GO:0006412, GO:0015935	PF00338	IPR001848, IPR005729, IPR027486	3	NA	1.71478e-17	0.00333729	0.320071	0.13761	0.321025	0.807352	0.307829	0.114148	3.1274e-17	0.0302548	0.999981	0.835875	0.551376	0.987073	0.999388	0.453427	0.0775385	0.517702	0	1.3608	489
	eL32_RPL32A	AT4G18100	sp|P49211|RL321_ARATH 60S ribosomal protein L32-1 OS=Arabidopsis thaliana OX=3702 GN=RPL32A PE=2 SV=2	264.873	HORVU5Hr1G075420.2;HORVU5Hr1G075500.3	2	HORVU5Hr1G075500.3 HORVU5Hr1G075500	chr5H:547244561-547246475	HC_G	60S ribosomal protein L32-1	GO:0003735, GO:0005622, GO:0005840, GO:0006412	PF01655	IPR001515	3	NA	6.30084e-14	0.486132	0.399621	0.570486	0.413836	0.353446	0.928852	0.0346233	7.00818e-14	0.675742	0.999981	0.940503	0.625088	0.987073	0.999388	0.355277	0	0.937472	0	0.447543	553
	eS25_RPS25B	AT2G21580	sp|Q9SIK2|RS252_ARATH 40S ribosomal protein S25-2 OS=Arabidopsis thaliana OX=3702 GN=RPS25B PE=3 SV=1	262.592	HORVU4Hr1G001220.3	1	HORVU4Hr1G001220.3 HORVU4Hr1G001220	chr4H:1808204-1809386	HC_G	40S ribosomal protein S25-4	none	PF03297	IPR004977, IPR011991	3	NA	3.41428e-16	0.000190078	0.233085	0.133581	0.93253	0.692984	0.652198	0.157961	4.73009e-16	0.00373982	0.999981	0.835875	0.965974	0.987073	0.999388	0.504892	0	1.07513	0	1.49703	370
	IF4E5	AT5G18110	sp|Q9FK59|IF4E5_ARATH Eukaryotic translation initiation factor NCBP OS=Arabidopsis thaliana OX=3702 GN=NCBP PE=2 SV=1	262.273	HORVU4Hr1G061500.4	1	HORVU4Hr1G061500.4 HORVU4Hr1G061500	chr4H:516126727-516130946	HC_G	eukaryotic translation initiation factor 4E	GO:0003723, GO:0003743, GO:0005737, GO:0006413	PF01652	IPR001040, IPR019770, IPR023398	3	NA	5.10609e-16	0.0127831	0.264102	0.960569	0.308029	0.900721	0.537856	0.553675	6.88948e-16	0.0745674	0.999981	0.995195	0.540971	0.987073	0.999388	0.783058	0	0.0106756	0	0.845229	175
	eL32_RPL32A	AT4G18100	sp|P49211|RL321_ARATH 60S ribosomal protein L32-1 OS=Arabidopsis thaliana OX=3702 GN=RPL32A PE=2 SV=2	262.247	HORVU5Hr1G075420.2;HORVU5Hr1G075500.3	1	HORVU5Hr1G075420.2 HORVU5Hr1G075420	chr5H:547114256-547116226	HC_G	60S ribosomal protein L32-1	GO:0003735, GO:0005622, GO:0005840, GO:0006412	PF01655	IPR001515	3	NA	6.30084e-14	0.486132	0.399621	0.570486	0.413836	0.353446	0.928852	0.0346233	7.00818e-14	0.675742	0.999981	0.940503	0.625088	0.987073	0.999388	0.355277	0	0.937472	0	0.447543	553
	eL40_RPL40A	AT2G36170	sp|B9DHA6|RL40A_ARATH Ubiquitin-60S ribosomal protein L40-1 OS=Arabidopsis thaliana OX=3702 GN=RPL40A PE=2 SV=1	261.222	HORVU1Hr1G023660.1;HORVU1Hr1G043930.8;HORVU7Hr1G103170.9;HORVU2Hr1G104440.1;HORVU6Hr1G026200.5;HORVU0Hr1G038500.2;HORVU6Hr1G014970.1;HORVU7Hr1G103550.4;HORVU6Hr1G014960.1;HORVU6Hr1G016150.3;HORVU1Hr1G087690.8;HORVU6Hr1G020140.6;HORVU5Hr1G019590.12;HORVU5Hr1G019600.6;HORVU7Hr1G103160.4;HORVU2Hr1G104410.26;HORVU7Hr1G102840.1;HORVU6Hr1G021700.4;HORVU7Hr1G103330.1;HORVU7Hr1G107010.1;HORVU7Hr1G109650.…	23	HORVU4Hr1G001170.5 HORVU4Hr1G001170	chr4H:1791494-1792119	HC_G	ubiquitin 4	GO:0003735, GO:0005515, GO:0005840, GO:0006412	PF00240, PF01020	IPR000626, IPR001975, IPR019954, IPR019956, IPR029071	5	X996	3.81449e-18	0.407176	0.26815	0.141897	0.795024	0.691516	0.746245	0.303842	8.78146e-18	0.618291	0.999981	0.835875	0.885975	0.987073	0.999388	0.619063	0	1.61423	0	0.574791	1847
	eL33_RPL35aC	AT1G74270	sp|Q9C912|R35A3_ARATH 60S ribosomal protein L35a-3 OS=Arabidopsis thaliana OX=3702 GN=RPL35AC PE=3 SV=1	258.983	HORVU7Hr1G031850.4	1	HORVU7Hr1G031850.4 HORVU7Hr1G031850	chr7H:65332787-65334403	HC_G	60S ribosomal protein L35a-3	GO:0003735, GO:0005622, GO:0005840, GO:0006412	PF01247	IPR001780, IPR009000, IPR018266	3	NA	8.23265e-17	0.00689853	0.244592	0.226945	0.988435	0.299267	0.568644	0.0582732	1.2686e-16	0.0493831	0.999981	0.836614	0.996854	0.987073	0.999388	0.377593	0	0.617445	0	0.957765	414
	eL36_RPL36B	AT3G53740	sp|Q9M352|RL362_ARATH 60S ribosomal protein L36-2 OS=Arabidopsis thaliana OX=3702 GN=RPL36B PE=3 SV=1	258.983	HORVU5Hr1G009600.1;HORVU1Hr1G072270.1;HORVU3Hr1G086410.2;HORVU5Hr1G009610.2	3	HORVU3Hr1G086410.2 HORVU3Hr1G086410	chr3H:616786077-616788095	HC_G	60S ribosomal protein L36-3	GO:0003735, GO:0005622, GO:0005840, GO:0006412	PF01158	IPR000509	3	NA	6.14405e-19	0.00045359	0.0186253	0.0190179	0.621719	0.18863	0.868263	0.241955	2.07919e-18	0.00698559	0.999981	0.835875	0.77709	0.987073	0.999388	0.569196	0	1.39767	0	0.789464	371
	eL40_RPL40A	AT2G36170	sp|B9DHA6|RL40A_ARATH Ubiquitin-60S ribosomal protein L40-1 OS=Arabidopsis thaliana OX=3702 GN=RPL40A PE=2 SV=1	258.038	HORVU1Hr1G023660.1;HORVU1Hr1G043930.8;HORVU7Hr1G103170.9;HORVU2Hr1G104440.1;HORVU6Hr1G026200.5;HORVU0Hr1G038500.2;HORVU6Hr1G014970.1;HORVU7Hr1G103550.4;HORVU6Hr1G014960.1;HORVU6Hr1G016150.3;HORVU1Hr1G087690.8;HORVU6Hr1G020140.6;HORVU5Hr1G019590.12;HORVU5Hr1G019600.6;HORVU7Hr1G103160.4;HORVU2Hr1G104410.26;HORVU7Hr1G102840.1;HORVU6Hr1G021700.4;HORVU7Hr1G103330.1;HORVU7Hr1G107010.1;HORVU7Hr1G109650.…	22	HORVU4Hr1G065100.3 HORVU4Hr1G065100	chr4H:543439817-543440440	HC_G	ubiquitin 6	GO:0003735, GO:0005515, GO:0005840, GO:0006412	PF00240, PF01020	IPR000626, IPR001975, IPR019954, IPR019956, IPR029071	5	X996	3.81449e-18	0.407176	0.26815	0.141897	0.795024	0.691516	0.746245	0.303842	8.78146e-18	0.618291	0.999981	0.835875	0.885975	0.987073	0.999388	0.619063	0	1.61423	0	0.574791	1847
	eL27_RPL27C	AT4G15000	sp|P51419|RL273_ARATH 60S ribosomal protein L27-3 OS=Arabidopsis thaliana OX=3702 GN=RPL27C PE=2 SV=2	253.997	HORVU7Hr1G063280.1;HORVU5Hr1G054100.1;HORVU2Hr1G086470.1;HORVU2Hr1G086480.1;HORVU5Hr1G054090.1;HORVU5Hr1G054130.1;HORVU5Hr1G054120.1;HORVU5Hr1G054110.2;HORVU2Hr1G086450.1	3	HORVU2Hr1G086470.1 HORVU2Hr1G086470	chr2H:623362665-623363076	HC_G	60S ribosomal protein L27-3	GO:0003735, GO:0005622, GO:0005840, GO:0006412	PF00467, PF01777	IPR001141, IPR005824, IPR008991, IPR014722	3	NA	1.58829e-18	2.05555e-05	0.185627	0.0336241	0.920406	0.292705	0.152071	0.828145	4.34799e-18	0.000751087	0.999981	0.835875	0.956858	0.987073	0.999388	0.923847	0.154051	1.17217	0	0.822033	490
	eL27_RPL27C	AT4G15000	sp|P51419|RL273_ARATH 60S ribosomal protein L27-3 OS=Arabidopsis thaliana OX=3702 GN=RPL27C PE=2 SV=2	253.997	HORVU7Hr1G063280.1;HORVU5Hr1G054100.1;HORVU2Hr1G086470.1;HORVU2Hr1G086480.1;HORVU5Hr1G054090.1;HORVU5Hr1G054130.1;HORVU5Hr1G054120.1;HORVU5Hr1G054110.2;HORVU2Hr1G086450.1	4	HORVU2Hr1G086480.1 HORVU2Hr1G086480	chr2H:623446142-623446553	HC_G	60S ribosomal protein L27-3	GO:0003735, GO:0005622, GO:0005840, GO:0006412	PF00467, PF01777	IPR001141, IPR005824, IPR008991, IPR014722	3	NA	1.58829e-18	2.05555e-05	0.185627	0.0336241	0.920406	0.292705	0.152071	0.828145	4.34799e-18	0.000751087	0.999981	0.835875	0.956858	0.987073	0.999388	0.923847	0.154051	1.17217	0	0.822033	490
	eL27_RPL27C	AT4G15000	sp|P51419|RL273_ARATH 60S ribosomal protein L27-3 OS=Arabidopsis thaliana OX=3702 GN=RPL27C PE=2 SV=2	253.997	HORVU7Hr1G063280.1;HORVU5Hr1G054100.1;HORVU2Hr1G086470.1;HORVU2Hr1G086480.1;HORVU5Hr1G054090.1;HORVU5Hr1G054130.1;HORVU5Hr1G054120.1;HORVU5Hr1G054110.2;HORVU2Hr1G086450.1	9	HORVU2Hr1G086450.1 HORVU2Hr1G086450	chr2H:623292054-623292464	HC_G	60S ribosomal protein L27-3	GO:0003735, GO:0005622, GO:0005840, GO:0006412	PF00467, PF01777	IPR001141, IPR005824, IPR008991, IPR014722	3	NA	1.58829e-18	2.05555e-05	0.185627	0.0336241	0.920406	0.292705	0.152071	0.828145	4.34799e-18	0.000751087	0.999981	0.835875	0.956858	0.987073	0.999388	0.923847	0.154051	1.17217	0	0.822033	490
	uL24_RPL26A	AT3G49910	sp|P51414|RL261_ARATH 60S ribosomal protein L26-1 OS=Arabidopsis thaliana OX=3702 GN=RPL26A PE=2 SV=2	246.978	HORVU3Hr1G026880.1	1	HORVU3Hr1G026880.1 HORVU3Hr1G026880	chr3H:111873622-111875153	HC_G	60S ribosomal protein L26-1	GO:0003735, GO:0005622, GO:0005840, GO:0006412, GO:0015934	PF00467, PF16906	IPR005756, IPR005824, IPR005825, IPR008991, IPR014722	3	NA	2.79969e-18	0.00987399	0.38574	0.281357	0.927691	0.417204	0.992764	0.163546	6.83146e-18	0.0625688	0.999981	0.842221	0.961763	0.987073	0.999399	0.510396	0	0.29892	0	1.39186	364
	uL1_RPL10aC	AT5G22440	sp|P59231|R10A3_ARATH 60S ribosomal protein L10a-3 OS=Arabidopsis thaliana OX=3702 GN=RPL10AC PE=1 SV=1	246.762	HORVU7Hr1G059090.5;HORVU4Hr1G001350.5	2	HORVU4Hr1G001350.5 HORVU4Hr1G001350	chr4H:2022938-2025577	HC_G	60S ribosomal protein L1-A	GO:0003723	PF00687	IPR016094, IPR016095, IPR023673, IPR023674, IPR028364	5	NA	1.00019e-14	0.414628	0.971377	0.742437	0.0874397	0.461905	0.556173	0.0452022	1.1758e-14	0.624961	0.999981	0.968725	0.27775	0.987073	0.999388	0.362201	0	0.862878	0	0.658375	1248
	EF1D2	AT2G18110	sp|Q9SI20|EF1D2_ARATH Elongation factor 1-delta 2 OS=Arabidopsis thaliana OX=3702 GN=At2g18110 PE=1 SV=1	246.285	HORVU2Hr1G031450.6	1	HORVU2Hr1G031450.6 HORVU2Hr1G031450	chr2H:119871708-119873112	HC_G	Elongation factor 1-delta 1	GO:0003746, GO:0005853, GO:0006414	PF00736	IPR001326, IPR010987, IPR014038, IPR014717	3	NA	1.54959e-16	0.0992224	0.267453	0.104997	0.3775	0.329382	0.564597	0.0150979	2.25891e-16	0.268192	0.999981	0.835875	0.599175	0.987073	0.999388	0.327612	0	0.331285	0	1.42048	340
	tRNA-Q	AT1G69410	sp|Q8W4F3|SYQ_ARATH Glutamine--tRNA ligase, cytoplasmic OS=Arabidopsis thaliana OX=3702 GN=OVA9 PE=2 SV=1	243.278	HORVU3Hr1G020250.8	1	HORVU3Hr1G020250.8 HORVU3Hr1G020250	chr3H:62416500-62422027	HC_G	Glutamine--tRNA ligase	GO:0000166, GO:0004812, GO:0004819, GO:0005524, GO:0005737, GO:0006412, GO:0006418, GO:0006425, GO:0016876, GO:0043039	PF00749, PF03950, PF04557, PF04558	IPR000924, IPR001412, IPR004514, IPR007638, IPR007639, IPR011035, IPR014729, IPR020056, IPR020058, IPR020059, IPR020061	5	NA	7.2917e-20	0.365965	0.868861	0.951973	0.472523	0.562451	0.918932	0.102476	4.90856e-19	0.577547	0.999981	0.995195	0.670713	0.987073	0.999388	0.44116	0	0.0355092	0	0.893512	1496
	eL43_RPL37aB	AT3G10950	sp|Q9SRK6|R37A1_ARATH Putative 60S ribosomal protein L37a-1 OS=Arabidopsis thaliana OX=3702 GN=RPL37AB PE=3 SV=1	241.778	HORVU1Hr1G085170.5;HORVU3Hr1G062590.1;HORVU7Hr1G081910.1	1	HORVU1Hr1G085170.5 HORVU1Hr1G085170	chr1H:535194659-535196726	HC_G	60S ribosomal protein L37a	GO:0003735, GO:0005622, GO:0005840, GO:0006412	PF01780	IPR002674, IPR011331, IPR011332	3	NA	5.57207e-14	0.0132733	0.413131	0.292872	0.578838	0.64602	0.951327	0.26387	6.22908e-14	0.0766765	0.999981	0.842797	0.746151	0.987073	0.999388	0.584354	0	1.67051	0	0.579889	197
	eL36_RPL36B	AT3G53740	sp|Q9M352|RL362_ARATH 60S ribosomal protein L36-2 OS=Arabidopsis thaliana OX=3702 GN=RPL36B PE=3 SV=1	240.542	HORVU5Hr1G009600.1;HORVU1Hr1G072270.1;HORVU3Hr1G086410.2;HORVU5Hr1G009610.2	2	HORVU1Hr1G072270.1 HORVU1Hr1G072270	chr1H:496930969-496933348	HC_G	60S ribosomal protein L36-2	GO:0003735, GO:0005622, GO:0005840, GO:0006412	PF01158	IPR000509	3	NA	6.14405e-19	0.00045359	0.0186253	0.0190179	0.621719	0.18863	0.868263	0.241955	2.07919e-18	0.00698559	0.999981	0.835875	0.77709	0.987073	0.999388	0.569196	0	1.39767	0	0.789464	371
	AtTIF3K1	AT4G33250	sp|Q9SZA3|EIF3K_ARATH Eukaryotic translation initiation factor 3 subunit K OS=Arabidopsis thaliana OX=3702 GN=TIF3K1 PE=2 SV=1	238.028	HORVU4Hr1G077250.1	1	HORVU4Hr1G077250.1 HORVU4Hr1G077250	chr4H:603599889-603603383	HC_G	Eukaryotic translation initiation factor 3 subunit K	GO:0003743, GO:0005488, GO:0005737, GO:0005852, GO:0006446, GO:0043022	PF10075	IPR009374, IPR011991, IPR016020, IPR016024	3	NA	5.73368e-18	0.031115	0.626853	0.558358	0.287689	0.72031	0.50698	0.0247807	1.23026e-17	0.135584	0.999981	0.935756	0.525843	0.987073	0.999388	0.334261	0	1.35139	0	0.581831	479
	uS5_RPS2D	AT3G57490	sp|Q9SCM3|RS24_ARATH 40S ribosomal protein S2-4 OS=Arabidopsis thaliana OX=3702 GN=RPS2D PE=2 SV=1	237.729	HORVU5Hr1G109910.2	1	HORVU5Hr1G109910.2 HORVU5Hr1G109910	chr5H:631251099-631252934	HC_G	30S ribosomal protein S5	GO:0003723, GO:0003735, GO:0005840, GO:0006412, GO:0015935	PF00333, PF03719	IPR005324, IPR005711, IPR013810, IPR014720, IPR014721, IPR018192, IPR020568	3	X59	4.57688e-16	0.00264351	0.702272	0.342181	0.987604	0.488621	0.668325	0.136814	6.21595e-16	0.0255505	0.999981	0.856834	0.996854	0.987073	0.999388	0.476182	0.0734359	1.65674	0	0.606019	435
	uS17_RPS11C	AT5G23740	sp|P42733|RS113_ARATH 40S ribosomal protein S11-3 OS=Arabidopsis thaliana OX=3702 GN=RPS11C PE=2 SV=2	237.656	HORVU2Hr1G099230.8	1	HORVU2Hr1G099230.8 HORVU2Hr1G099230	chr2H:687150086-687152467	HC_G	40S ribosomal protein S11	GO:0003735, GO:0005622, GO:0005840, GO:0006412	PF00366, PF16205	IPR000266, IPR012340, IPR019979, IPR028333, IPR032440	3	X471	1.19962e-16	0.00647229	0.20617	0.0475232	0.724514	0.517978	0.760956	0.439878	1.78649e-16	0.0475656	0.999981	0.835875	0.847172	0.987073	0.999388	0.705108	0	0.255472	0	0.680004	379
	eL43_RPL37aB	AT3G10950	sp|Q9SRK6|R37A1_ARATH Putative 60S ribosomal protein L37a-1 OS=Arabidopsis thaliana OX=3702 GN=RPL37AB PE=3 SV=1	236.465	HORVU1Hr1G085170.5;HORVU3Hr1G062590.1;HORVU7Hr1G081910.1	2	HORVU3Hr1G062590.1 HORVU3Hr1G062590	chr3H:477737855-477739885	HC_G	60S ribosomal protein L37a	GO:0003735, GO:0005622, GO:0005840, GO:0006412	PF01780	IPR002674, IPR011331, IPR011332	3	NA	5.57207e-14	0.0132733	0.413131	0.292872	0.578838	0.64602	0.951327	0.26387	6.22908e-14	0.0766765	0.999981	0.842797	0.746151	0.987073	0.999388	0.584354	0	1.67051	0	0.579889	197
	eL34_RPL34A	AT1G26880	sp|Q42351|RL341_ARATH 60S ribosomal protein L34-1 OS=Arabidopsis thaliana OX=3702 GN=RPL34A PE=2 SV=1	219.947	HORVU5Hr1G066000.1	1	HORVU5Hr1G066000.1 HORVU5Hr1G066000	chr5H:504580620-504582388	HC_G	60S ribosomal protein L34	GO:0003735, GO:0005622, GO:0005840, GO:0006412	PF01199	IPR008195, IPR018065	3	X471	1.11164e-17	0.00221049	0.045645	0.0196385	0.991704	0.272732	0.450794	0.278842	2.14222e-17	0.0224772	0.999981	0.835875	0.99697	0.987073	0.999388	0.602304	0	1.56162	0	0.709985	380
	uS9_RPS16A	AT2G09990	sp|Q9SK22|RS161_ARATH 40S ribosomal protein S16-1 OS=Arabidopsis thaliana OX=3702 GN=RPS16A PE=2 SV=1	216.989	HORVU4Hr1G023530.1;HORVU4Hr1G023570.2	1	HORVU4Hr1G023530.1 HORVU4Hr1G023530	chr4H:128540137-128544405	HC_G	30S ribosomal protein S9	GO:0003735, GO:0005840, GO:0006412	PF00380	IPR000754, IPR014721, IPR020568, IPR020574	3	NA	1.93698e-17	0.000175563	0.467351	0.197888	0.0247843	0.552558	0.460801	0.776184	3.4565e-17	0.0034888	0.999981	0.835875	0.131541	0.987073	0.999388	0.897048	0.0771282	1.22672	0	0.777454	386
	eL31_RPL31A	AT2G19740	sp|Q9SLL7|RL311_ARATH 60S ribosomal protein L31-1 OS=Arabidopsis thaliana OX=3702 GN=RPL31A PE=3 SV=1	214.636	HORVU7Hr1G050170.1	1	HORVU7Hr1G050170.1 HORVU7Hr1G050170	chr7H:179773136-179774855	HC_G	60S ribosomal protein L31	GO:0003735, GO:0005622, GO:0005840, GO:0006412	PF01198	IPR000054, IPR023621	3	NA	3.50705e-14	0.00495393	0.43105	0.288459	0.715254	0.483993	0.795366	0.133582	3.97242e-14	0.0393149	0.999981	0.842797	0.842033	0.987073	0.999388	0.474024	0	0.153718	0	2.05617	354
	uL6_RPL9B,uL6_RPL9C	AT1G33120,AT1G33140	sp|P49209|RL91_ARATH 60S ribosomal protein L9-1 OS=Arabidopsis thaliana OX=3702 GN=RPL9B PE=1 SV=3	211.713	HORVU7Hr1G002060.1;HORVU0Hr1G006020.2;HORVU3Hr1G001140.5	3	HORVU3Hr1G001140.5 HORVU3Hr1G001140	chr3H:2524445-2526706	HC_G	Ribosomal protein L6 family	GO:0003735, GO:0005622, GO:0005840, GO:0006412, GO:0019843	PF00347	IPR002359, IPR020040	3	X410	2.39848e-17	3.52313e-05	0.961604	0.324466	0.330735	0.680967	0.647206	0.0979977	4.1927e-17	0.00112198	0.999981	0.856834	0.558981	0.987073	0.999388	0.431606	0.527795	1.13836	0	1.45269	421
	eL37_RPL37B	AT1G52300	sp|Q43292|RL372_ARATH 60S ribosomal protein L37-2 OS=Arabidopsis thaliana OX=3702 GN=RPL37B PE=3 SV=2	211.103	HORVU6Hr1G005390.1;HORVU6Hr1G090070.1	1	HORVU6Hr1G005390.1 HORVU6Hr1G005390	chr6H:12012122-12015583	HC_G	60S ribosomal protein L37-2	GO:0003735, GO:0005622, GO:0005840, GO:0006412	PF01907	IPR001569, IPR011331, IPR011332, IPR018267	3	NA	1.19999e-15	0.0207126	0.28939	0.361682	0.0222767	0.51004	0.872641	0.31072	1.54846e-15	0.105215	0.999981	0.856834	0.123949	0.987073	0.999388	0.622443	0	1.29681	0	1.18169	507
	eL22_RPL22B	AT3G05560	sp|Q9M9W1|RL222_ARATH 60S ribosomal protein L22-2 OS=Arabidopsis thaliana OX=3702 GN=RPL22B PE=2 SV=1	210.129	HORVU2Hr1G019160.1	1	HORVU2Hr1G019160.1 HORVU2Hr1G019160	chr2H:49900277-49901429	HC_G	60S ribosomal protein L22-2	GO:0003735, GO:0005622, GO:0005840, GO:0006412	PF01776	IPR002671	3	NA	1.73519e-17	0.0115941	0.441866	0.187788	0.390136	0.818361	0.726243	0.00813787	3.15766e-17	0.0695644	0.999981	0.835875	0.607614	0.987073	0.999388	0.327612	0	1.20575	0	0.708881	442
	eL38_RPL38A,eL38_RPL38B	AT2G43460,AT3G59540	sp|O22860|RL38_ARATH 60S ribosomal protein L38 OS=Arabidopsis thaliana OX=3702 GN=RPL38A PE=3 SV=1	206.944	HORVU2Hr1G043220.1	1	HORVU2Hr1G043220.1 HORVU2Hr1G043220	chr2H:219489840-219491715	HC_G	60S ribosomal protein L38	GO:0003735, GO:0005622, GO:0005840, GO:0006412	PF01781	IPR002675	3	NA	7.09282e-12	0.0802653	0.713525	0.752926	0.323791	0.91656	0.281212	0.0676303	7.40276e-12	0.233465	0.999981	0.968725	0.552023	0.988656	0.999388	0.388874	0	0.0949299	0	0.791613	555
	eS24_RPS24A	AT3G04920	sp|Q9SS17|RS241_ARATH 40S ribosomal protein S24-1 OS=Arabidopsis thaliana OX=3702 GN=RPS24A PE=2 SV=1	206.308	HORVU7Hr1G088580.1;HORVU2Hr1G055560.1	1	HORVU7Hr1G088580.1 HORVU7Hr1G088580	chr7H:537951250-537953582	HC_G	40S ribosomal protein S24-2	GO:0000166, GO:0003735, GO:0005622, GO:0005840, GO:0006412	PF01282	IPR001976, IPR012677, IPR012678, IPR018098	3	X471	1.26133e-17	0.0430312	0.259311	0.0831645	0.854681	0.422636	0.243397	0.357102	2.39536e-17	0.164699	0.999981	0.835875	0.919041	0.987073	0.999388	0.654062	0	0.314457	0	0.858772	376
	IF5Y	AT1G36730	sp|Q9C8F1|IF5Y_ARATH Probable eukaryotic translation initiation factor 5-1 OS=Arabidopsis thaliana OX=3702 GN=At1g36730 PE=2 SV=1	203.993	HORVU6Hr1G021630.5	1	HORVU6Hr1G021630.5 HORVU6Hr1G021630	chr6H:66485172-66488198	HC_G	Eukaryotic translation initiation factor 5	GO:0003743, GO:0005488, GO:0005515, GO:0006413	PF01873, PF02020	IPR002735, IPR003307, IPR016021, IPR016024, IPR016189, IPR016190	3	NA	1.86463e-16	0.190061	0.307375	0.123055	0.51266	0.29944	0.702064	0.259216	2.68041e-16	0.390497	0.999981	0.835875	0.700851	0.987073	0.999388	0.581721	0	1.01976	0	1.31407	502
	eL27_RPL27B	AT3G22230	sp|Q8LCL3|RL272_ARATH 60S ribosomal protein L27-2 OS=Arabidopsis thaliana OX=3702 GN=RPL27B PE=2 SV=2	203.755	HORVU7Hr1G063280.1;HORVU5Hr1G054100.1;HORVU2Hr1G086470.1;HORVU2Hr1G086480.1;HORVU5Hr1G054090.1;HORVU5Hr1G054130.1;HORVU5Hr1G054120.1;HORVU5Hr1G054110.2;HORVU2Hr1G086450.1	1	HORVU7Hr1G063280.1 HORVU7Hr1G063280	chr7H:310310675-310312034	HC_G	60S ribosomal protein L27-3	GO:0003735, GO:0005622, GO:0005840, GO:0006412	PF00467, PF01777	IPR001141, IPR005824, IPR008991, IPR014722	3	NA	1.58829e-18	2.05555e-05	0.185627	0.0336241	0.920406	0.292705	0.152071	0.828145	4.34799e-18	0.000751087	0.999981	0.835875	0.956858	0.987073	0.999388	0.923847	0.154051	1.17217	0	0.822033	490
	uS14_RPS29A,uS14_RPS29B,uS14_RPS29C	AT3G43980,AT3G44010,AT4G33865	sp|Q680P8|RS29_ARATH 40S ribosomal protein S29 OS=Arabidopsis thaliana OX=3702 GN=RPS29A PE=3 SV=2	191.957	HORVU5Hr1G098740.1;HORVU0Hr1G011940.3;HORVU4Hr1G037800.1	1	HORVU5Hr1G098740.1 HORVU5Hr1G098740	chr5H:608586875-608588528	HC_G	40S ribosomal protein S29	GO:0003723, GO:0003735, GO:0005622, GO:0005840, GO:0006412, GO:0015935	PF00253	IPR001209, IPR023676	3	NA	1.67766e-17	0.0897746	0.552457	0.169812	0.149197	0.462792	0.82164	0.00329664	3.07098e-17	0.251693	0.999981	0.835875	0.374315	0.987073	0.999388	0.307165	0	0.0441233	0	1.36523	335
	eS7_RPS7B	AT3G02560	sp|Q9M885|RS72_ARATH 40S ribosomal protein S7-2 OS=Arabidopsis thaliana OX=3702 GN=RPS7B PE=2 SV=1	185.345	HORVU4Hr1G055230.1	1	HORVU4Hr1G055230.1 HORVU4Hr1G055230	chr4H:463380561-463382856	HC_G	40S ribosomal protein S7	GO:0003735, GO:0005622, GO:0005840, GO:0006412	PF01251	IPR000554	5	NA	5.71667e-17	0.430578	0.445082	0.230834	0.194054	0.447094	0.504406	0.095886	9.07361e-17	0.63816	0.999981	0.840832	0.432701	0.987073	0.999388	0.427614	0	0.0736612	0	0.957962	1561
	eS24_RPS24A	AT3G04920	sp|Q9SS17|RS241_ARATH 40S ribosomal protein S24-1 OS=Arabidopsis thaliana OX=3702 GN=RPS24A PE=2 SV=1	184.995	HORVU6Hr1G044840.1	1	HORVU6Hr1G044840.1 HORVU6Hr1G044840	chr6H:258696168-258828973	HC_G	40S ribosomal protein S24-2	GO:0000166, GO:0003735, GO:0005622, GO:0005840, GO:0006412	PF01282	IPR001976, IPR012677, IPR012678, IPR018098	3	NA	7.21618e-15	0.0276353	0.269835	0.328763	0.566025	0.226394	0.318154	0.213407	8.58888e-15	0.127256	0.999981	0.856834	0.7369	0.987073	0.999388	0.550675	0	1.7961	0	0.691707	372
	uS14_RPS29A,uS14_RPS29B,uS14_RPS29C	AT3G43980,AT3G44010,AT4G33865	sp|Q680P8|RS29_ARATH 40S ribosomal protein S29 OS=Arabidopsis thaliana OX=3702 GN=RPS29A PE=3 SV=2	181.27	HORVU5Hr1G098740.1;HORVU0Hr1G011940.3;HORVU4Hr1G037800.1	2	HORVU0Hr1G011940.3 HORVU0Hr1G011940	chrUn:68387900-68388929	HC_G	40S ribosomal protein S29	GO:0003723, GO:0003735, GO:0005622, GO:0005840, GO:0006412, GO:0015935	PF00253	IPR001209, IPR023676	3	NA	1.67766e-17	0.0897746	0.552457	0.169812	0.149197	0.462792	0.82164	0.00329664	3.07098e-17	0.251693	0.999981	0.835875	0.374315	0.987073	0.999388	0.307165	0	0.0441233	0	1.36523	335
	eL43_RPL37aB	AT3G10950	sp|Q9SRK6|R37A1_ARATH Putative 60S ribosomal protein L37a-1 OS=Arabidopsis thaliana OX=3702 GN=RPL37AB PE=3 SV=1	180.465	HORVU1Hr1G085170.5;HORVU3Hr1G062590.1;HORVU7Hr1G081910.1	3	HORVU7Hr1G081910.1 HORVU7Hr1G081910	chr7H:489454032-489456109	HC_G	60S ribosomal protein L37a	GO:0003735, GO:0005622, GO:0005840, GO:0006412	PF01780	IPR002674, IPR011331, IPR011332	3	NA	5.57207e-14	0.0132733	0.413131	0.292872	0.578838	0.64602	0.951327	0.26387	6.22908e-14	0.0766765	0.999981	0.842797	0.746151	0.987073	0.999388	0.584354	0	1.67051	0	0.579889	197
	eL36_RPL36B	AT3G53740	sp|Q9M352|RL362_ARATH 60S ribosomal protein L36-2 OS=Arabidopsis thaliana OX=3702 GN=RPL36B PE=3 SV=1	176.495	HORVU5Hr1G009600.1;HORVU1Hr1G072270.1;HORVU3Hr1G086410.2;HORVU5Hr1G009610.2	1	HORVU5Hr1G009600.1 HORVU5Hr1G009600	chr5H:23245645-23246890	HC_G	60S ribosomal protein L36-3	GO:0003735, GO:0005622, GO:0005840, GO:0006412	PF01158	IPR000509	3	NA	6.14405e-19	0.00045359	0.0186253	0.0190179	0.621719	0.18863	0.868263	0.241955	2.07919e-18	0.00698559	0.999981	0.835875	0.77709	0.987073	0.999388	0.569196	0	1.39767	0	0.789464	371
	tRNA-Y	AT1G69410	sp|Q8S9J2|SYYC1_ARATH Tyrosine--tRNA ligase 1, cytoplasmic OS=Arabidopsis thaliana OX=3702 GN=At2g33840 PE=2 SV=1	166.775	HORVU0Hr1G021230.1	1	HORVU0Hr1G021230.1 HORVU0Hr1G021230	chrUn:111397138-111402308	HC_G	Tyrosine--tRNA ligase	GO:0000166, GO:0004812, GO:0005524, GO:0006418	PF00579	IPR002305, IPR014729	3	NA	1.04681e-17	0.0368202	0.804452	0.410502	0.494678	0.763282	0.915289	0.104874	2.03623e-17	0.149447	0.999981	0.881319	0.687238	0.987073	0.999388	0.444603	0	0.0258	0	1.31996	334
	eS26_RPS26C	AT3G56340	sp|Q9LYK9|RS263_ARATH 40S ribosomal protein S26-3 OS=Arabidopsis thaliana OX=3702 GN=RPS26C PE=2 SV=1	164.606	HORVU5Hr1G111820.1	1	HORVU5Hr1G111820.1 HORVU5Hr1G111820	chr5H:637279017-637281270	HC_G	40S ribosomal protein S26	GO:0003735, GO:0005622, GO:0005840, GO:0006412	PF01283	IPR000892	3	NA	5.70939e-16	0.0425724	0.327656	0.693089	0.813189	0.263301	0.816231	0.0945229	7.64123e-16	0.164208	0.999981	0.968725	0.898391	0.987073	0.999388	0.425353	0	1.34523	0.0229744	0.657731	551
	eL42_RPL36aA,eL42_RPL36aB	AT3G23390,AT4G14320	sp|O23290|RL36A_ARATH 60S ribosomal protein L36a OS=Arabidopsis thaliana OX=3702 GN=RPL36AA PE=3 SV=3	150.2	HORVU5Hr1G081590.1;HORVU5Hr1G101600.1;HORVU7Hr1G104300.1;HORVU2Hr1G045920.1	1	HORVU5Hr1G081590.1 HORVU5Hr1G081590	chr5H:565124883-565128809	HC_G	60S ribosomal protein L44	GO:0003735, GO:0005622, GO:0005840, GO:0006412	PF00935	IPR000552, IPR011332	3	NA	3.42284e-14	0.0998896	0.15008	0.163894	0.275468	0.314833	0.36789	0.757182	3.88234e-14	0.268779	0.999981	0.835875	0.514869	0.987073	0.999388	0.887634	0	1.15519	0	0.392575	505
	eS28_RPS28A,eS28_RPS28B	AT3G10090,AT5G03850	sp|Q9SR73|RS281_ARATH 40S ribosomal protein S28-1 OS=Arabidopsis thaliana OX=3702 GN=RPS28A PE=3 SV=1	147.425	HORVU3Hr1G115820.3	1	HORVU3Hr1G115820.3 HORVU3Hr1G115820	chr3H:694227797-694264864	HC_G	40S ribosomal protein S28	GO:0003735, GO:0005622, GO:0005840, GO:0006412	PF01200	IPR000289, IPR012340, IPR028626	3	NA	8.83015e-16	0.000131223	0.51635	0.145198	0.741109	0.809419	0.624321	0.161767	1.15443e-15	0.00283443	0.999981	0.835875	0.856638	0.987073	0.999388	0.510396	0.306256	1.08904	0	0.892613	358
	eS19_RPS19C	AT5G61170	sp|Q9FNP8|RS193_ARATH 40S ribosomal protein S19-3 OS=Arabidopsis thaliana OX=3702 GN=RPS19C PE=2 SV=1	146.292	HORVU5Hr1G052240.6	1	HORVU5Hr1G052240.6 HORVU5Hr1G052240	chr5H:408670025-408671648	HC_G	40S ribosomal protein S19	GO:0003735, GO:0005622, GO:0005840, GO:0006412	PF01090	IPR001266, IPR011991, IPR018277	3	NA	2.93203e-19	0.000199966	0.118828	0.121256	0.390741	0.960406	0.414232	0.0408815	1.2514e-18	0.00388058	0.999981	0.835875	0.607998	0.99798	0.999388	0.357208	0	0.544717	0	1.52098	369
	tRNA-F	AT1G69410	sp|Q9T034|SYFA_ARATH Phenylalanine--tRNA ligase alpha subunit, cytoplasmic OS=Arabidopsis thaliana OX=3702 GN=At4g39280 PE=2 SV=3	145.899	HORVU5Hr1G061970.11	1	HORVU5Hr1G061970.11 HORVU5Hr1G061970	chr5H:482626848-482692111	HC_G	Phenylalanine--tRNA ligase alpha subunit	GO:0000049, GO:0000166, GO:0004812, GO:0004826, GO:0005524, GO:0005737, GO:0006418, GO:0006432, GO:0043039	PF01409	IPR002319, IPR004529, IPR006195	5	NA	6.02186e-18	0.128862	0.920636	0.654457	0.153997	0.828945	0.861512	0.314837	1.28397e-17	0.308674	0.999981	0.961275	0.379868	0.987073	0.999388	0.625725	0	1.33116	0	0.685868	1438
	eL42_RPL36aA,eL42_RPL36aB	AT3G23390,AT4G14320	sp|O23290|RL36A_ARATH 60S ribosomal protein L36a OS=Arabidopsis thaliana OX=3702 GN=RPL36AA PE=3 SV=3	142.2	HORVU5Hr1G081590.1;HORVU5Hr1G101600.1;HORVU7Hr1G104300.1;HORVU2Hr1G045920.1	2	HORVU5Hr1G101600.1 HORVU5Hr1G101600	chr5H:612888182-612890622	HC_G	60S ribosomal protein L44	GO:0003735, GO:0005622, GO:0005840, GO:0006412	PF00935	IPR000552, IPR011332	3	NA	3.42284e-14	0.0998896	0.15008	0.163894	0.275468	0.314833	0.36789	0.757182	3.88234e-14	0.268779	0.999981	0.835875	0.514869	0.987073	0.999388	0.887634	0	1.15519	0	0.392575	505
	eS10_RPS10A	AT4G25740	sp|Q9SW09|RS101_ARATH 40S ribosomal protein S10-1 OS=Arabidopsis thaliana OX=3702 GN=RPS10A PE=2 SV=1	135.292	HORVU0Hr1G004700.1	1	HORVU0Hr1G004700.1 HORVU0Hr1G004700	chrUn:27157663-27160063	HC_G	40S ribosomal protein S10	none	PF03501	IPR005326	3	NA	8.32421e-17	0.0637715	0.540309	0.505596	0.547075	0.396679	0.645843	0.00308123	1.28033e-16	0.202787	0.999981	0.911499	0.72885	0.987073	0.999388	0.307165	0	1.654	0	0.725437	242
	eS10_RPS10A	AT4G25740	sp|Q9SW09|RS101_ARATH 40S ribosomal protein S10-1 OS=Arabidopsis thaliana OX=3702 GN=RPS10A PE=2 SV=1	135.035	HORVU3Hr1G111760.2	1	HORVU3Hr1G111760.2 HORVU3Hr1G111760	chr3H:684491487-684493790	HC_G	40S ribosomal protein S10	none	PF03501	IPR005326	3	NA	1.13674e-14	0.000576982	0.625958	0.7635	0.671982	0.737769	0.837862	0.170128	1.33192e-14	0.00818985	0.999981	0.971928	0.811171	0.987073	0.999388	0.512862	0.038359	0.559722	0	0.923568	482
	eL31_RPL31C	AT5G56710	sp|P51420|RL313_ARATH 60S ribosomal protein L31-3 OS=Arabidopsis thaliana OX=3702 GN=RPL31C PE=3 SV=2	130.697	HORVU6Hr1G070670.1	1	HORVU6Hr1G070670.1 HORVU6Hr1G070670	chr6H:492317577-492319739	HC_G	60S ribosomal protein L31	GO:0003735, GO:0005622, GO:0005840, GO:0006412	PF01198	IPR000054, IPR023621	3	NA	2.8865e-14	0.00305559	0.45552	0.205128	0.914906	0.82824	0.723464	0.238565	3.29506e-14	0.0284991	0.999981	0.835875	0.954484	0.987073	0.999388	0.569196	0	1.85635	0	0.825822	366
	eL28_RPL28A	AT2G19730	sp|O82204|RL281_ARATH 60S ribosomal protein L28-1 OS=Arabidopsis thaliana OX=3702 GN=RPL28A PE=1 SV=1	129.482	HORVU3Hr1G066430.3	1	HORVU3Hr1G066430.3 HORVU3Hr1G066430	chr3H:505516326-505517488	HC_G	60S ribosomal protein L28-1	none	PF01778	IPR029004	3	NA	3.67253e-16	0.00386925	0.210744	0.157215	0.970405	0.571114	0.720746	0.24102	5.05966e-16	0.0332887	0.999981	0.835875	0.98644	0.987073	0.999388	0.569196	0	1.12974	0	0.897457	410
	eS21_RPS21C	AT5G27700	sp|Q3E902|RS212_ARATH 40S ribosomal protein S21-2 OS=Arabidopsis thaliana OX=3702 GN=RPS21C PE=1 SV=2	129.06	HORVU2Hr1G019960.2	1	HORVU2Hr1G019960.2 HORVU2Hr1G019960	chr2H:52785272-52787781	HC_G	40S ribosomal protein S21	GO:0003735, GO:0005622, GO:0005840, GO:0006412	PF01249	IPR001931, IPR018279	3	X1632	9.55204e-14	0.0178212	0.0474217	0.0051364	0.234103	0.319093	0.372856	0.908242	1.05314e-13	0.0941872	0.999981	0.835875	0.479204	0.987073	0.999388	0.961977	0	0.928813	0	1.3047	571
	eL36_RPL36B	AT3G53740	sp|Q9M352|RL362_ARATH 60S ribosomal protein L36-2 OS=Arabidopsis thaliana OX=3702 GN=RPL36B PE=3 SV=1	128.922	HORVU5Hr1G009600.1;HORVU1Hr1G072270.1;HORVU3Hr1G086410.2;HORVU5Hr1G009610.2	4	HORVU5Hr1G009610.2 HORVU5Hr1G009610	chr5H:23346302-23348274	HC_G	60S ribosomal protein L36-3	GO:0003735, GO:0005622, GO:0005840, GO:0006412	PF01158	IPR000509	3	NA	6.14405e-19	0.00045359	0.0186253	0.0190179	0.621719	0.18863	0.868263	0.241955	2.07919e-18	0.00698559	0.999981	0.835875	0.77709	0.987073	0.999388	0.569196	0	1.39767	0	0.789464	371
	eL30_RPL30C	AT3G18740	sp|Q9LSA3|RL303_ARATH 60S ribosomal protein L30-3 OS=Arabidopsis thaliana OX=3702 GN=RPL30C PE=3 SV=1	127.425	HORVU0Hr1G023290.1;HORVU1Hr1G068640.1	1	HORVU0Hr1G023290.1 HORVU0Hr1G023290	chrUn:117229631-117231394	HC_G	60S ribosomal protein L30	none	PF01248	IPR004038, IPR022991, IPR029064	3	NA	1.54382e-17	0.000443122	0.863795	0.544083	0.581361	0.616471	0.460692	0.0122307	2.84907e-17	0.00696656	0.999981	0.930787	0.746751	0.987073	0.999388	0.327612	0.0389744	0.401794	0	1.01636	400
	eL37_RPL37B	AT1G52300	sp|Q43292|RL372_ARATH 60S ribosomal protein L37-2 OS=Arabidopsis thaliana OX=3702 GN=RPL37B PE=3 SV=2	112.231	HORVU6Hr1G005390.1;HORVU6Hr1G090070.1	2	HORVU6Hr1G090070.1 HORVU6Hr1G090070	chr6H:571355681-571357186	HC_G	60S ribosomal protein L37-2	GO:0003735, GO:0005622, GO:0005840, GO:0006412	PF01907	IPR001569, IPR011331, IPR011332, IPR018267	3	NA	1.19999e-15	0.0207126	0.28939	0.361682	0.0222767	0.51004	0.872641	0.31072	1.54846e-15	0.105215	0.999981	0.856834	0.123949	0.987073	0.999388	0.622443	0	1.29681	0	1.18169	507
	eL42_RPL36aA,eL42_RPL36aB	AT3G23390,AT4G14320	sp|O23290|RL36A_ARATH 60S ribosomal protein L36a OS=Arabidopsis thaliana OX=3702 GN=RPL36AA PE=3 SV=3	110.2	HORVU5Hr1G081590.1;HORVU5Hr1G101600.1;HORVU7Hr1G104300.1;HORVU2Hr1G045920.1	3	HORVU7Hr1G104300.1 HORVU7Hr1G104300	chr7H:614313968-614318441	HC_G	60S ribosomal protein L44	GO:0003735, GO:0005622, GO:0005840, GO:0006412	PF00935	IPR000552, IPR011332	3	NA	3.42284e-14	0.0998896	0.15008	0.163894	0.275468	0.314833	0.36789	0.757182	3.88234e-14	0.268779	0.999981	0.835875	0.514869	0.987073	0.999388	0.887634	0	1.15519	0	0.392575	505
	eL40_RPL40A	AT2G36170	sp|B9DHA6|RL40A_ARATH Ubiquitin-60S ribosomal protein L40-1 OS=Arabidopsis thaliana OX=3702 GN=RPL40A PE=2 SV=1	105.036	HORVU1Hr1G023660.1;HORVU1Hr1G043930.8;HORVU7Hr1G103170.9;HORVU2Hr1G104440.1;HORVU6Hr1G026200.5;HORVU0Hr1G038500.2;HORVU6Hr1G014970.1;HORVU7Hr1G103550.4;HORVU6Hr1G014960.1;HORVU6Hr1G016150.3;HORVU1Hr1G087690.8;HORVU6Hr1G020140.6;HORVU5Hr1G019590.12;HORVU5Hr1G019600.6;HORVU7Hr1G103160.4;HORVU2Hr1G104410.26;HORVU7Hr1G102840.1;HORVU6Hr1G021700.4;HORVU7Hr1G103330.1;HORVU7Hr1G107010.1;HORVU7Hr1G109650.…	16	HORVU2Hr1G104410.26 HORVU2Hr1G104410	chr2H:703632777-703637381	HC_G	ubiquitin 7	GO:0003735, GO:0005515, GO:0005840, GO:0006412	PF00240, PF01020	IPR000626, IPR001975, IPR019954, IPR019956, IPR029071	5	X996	3.81449e-18	0.407176	0.26815	0.141897	0.795024	0.691516	0.746245	0.303842	8.78146e-18	0.618291	0.999981	0.835875	0.885975	0.987073	0.999388	0.619063	0	1.61423	0	0.574791	1847
	uL13_RPL13aB	AT3G24830	sp|Q9LRX8|R13A2_ARATH 60S ribosomal protein L13a-2 OS=Arabidopsis thaliana OX=3702 GN=RPL13AB PE=2 SV=1	103.151	HORVU2Hr1G063880.1	1	HORVU2Hr1G063880.1 HORVU2Hr1G063880	chr2H:432597894-432601539	HC_G	60S ribosomal protein L13a-2	GO:0003735, GO:0005840, GO:0006412, GO:0015934	PF00572	IPR005755, IPR005822, IPR023563, IPR023564	3	X352	1.23345e-16	0.0611918	0.872629	0.843502	0.176387	0.483074	0.535739	0.0181487	1.83357e-16	0.199214	0.999981	0.985018	0.409883	0.987073	0.999388	0.327612	0	0.148365	0	0.553908	478
	eL29_RPL29A	AT3G06700	sp|Q9M7X7|RL291_ARATH 60S ribosomal protein L29-1 OS=Arabidopsis thaliana OX=3702 GN=RPL29A PE=1 SV=1	99.9182	HORVU1Hr1G059570.2	1	HORVU1Hr1G059570.2 HORVU1Hr1G059570	chr1H:433922139-433923652	HC_G	60S ribosomal protein L29-1	GO:0003735, GO:0005622, GO:0005840, GO:0006412	PF01779	IPR002673	3	NA	2.98299e-13	0.0510952	0.101067	0.365713	0.110658	0.0360153	0.849639	0.465582	3.23005e-13	0.180798	0.999981	0.858463	0.313766	0.987073	0.999388	0.721439	0	0.427273	0	0.994942	508
	eS12_RPS12A	AT1G15930	sp|Q9S9P1|RS121_ARATH 40S ribosomal protein S12-1 OS=Arabidopsis thaliana OX=3702 GN=RPS12A PE=2 SV=1	93.0409	HORVU2Hr1G053290.6	1	HORVU2Hr1G053290.6 HORVU2Hr1G053290	chr2H:325360867-325362534	HC_G	40S ribosomal protein S12	GO:0003735, GO:0005622, GO:0005840, GO:0006412	PF01248	IPR000530, IPR004038, IPR029064	3	NA	7.03735e-14	0.12021	0.0471188	0.0251228	0.116129	0.310224	0.398665	0.00659753	7.80392e-14	0.298304	0.999981	0.835875	0.321589	0.987073	0.999388	0.322037	0	1.60427	0	1.02211	195
	BCAT5	AT1G69410	sp|Q9FYA6|BCAT5_ARATH Branched-chain-amino-acid aminotransferase 5, chloroplastic OS=Arabidopsis thaliana OX=3702 GN=BCAT5 PE=1 SV=1	92.9433	HORVU4Hr1G087100.6	1	HORVU4Hr1G087100.6 HORVU4Hr1G087100	chr4H:636198197-636202886	HC_G	Branched-chain-amino-acid aminotransferase 6	GO:0000166, GO:0003824, GO:0004084, GO:0004812, GO:0005524, GO:0006418, GO:0008152, GO:0009081	PF01063	IPR001412, IPR001544, IPR005786, IPR018300	5	NA	9.40777e-19	0.508655	0.767966	0.431316	0.254871	0.599774	0.512981	0.851924	2.87804e-18	0.690839	0.999981	0.891803	0.492685	0.987073	0.999388	0.938438	0	1.59674	0	0.694875	2062
	uS9_RPS16A	AT2G09990	sp|Q9SK22|RS161_ARATH 40S ribosomal protein S16-1 OS=Arabidopsis thaliana OX=3702 GN=RPS16A PE=2 SV=1	90.9894	HORVU5Hr1G045620.1	1	HORVU5Hr1G045620.1 HORVU5Hr1G045620	chr5H:352755344-352757223	HC_G	30S ribosomal protein S9	GO:0003735, GO:0005840, GO:0006412	PF00380	IPR000754, IPR014721, IPR020568, IPR020574	3	NA	4.03381e-17	0.00014164	0.305901	0.434581	0.324208	0.683471	0.778408	0.124017	6.65337e-17	0.00300712	0.999981	0.892812	0.552355	0.987073	0.999388	0.469731	0.111795	1.17641	0	0.435832	488
	eL28_RPL28A	AT2G19730	sp|O82204|RL281_ARATH 60S ribosomal protein L28-1 OS=Arabidopsis thaliana OX=3702 GN=RPL28A PE=1 SV=1	82.1079	HORVU1Hr1G079370.1	1	HORVU1Hr1G079370.1 HORVU1Hr1G079370	chr1H:522834724-522837858	HC_G	60S ribosomal protein L28-1	none	PF01778	IPR029004	3	NA	1.34155e-13	0.0221154	0.20919	0.252689	0.587716	0.391185	0.973951	0.365383	1.47126e-13	0.109869	0.999981	0.840832	0.751356	0.987073	0.999388	0.657689	0	0.530523	0	1.00208	373
	eL42_RPL36aA,eL42_RPL36aB	AT3G23390,AT4G14320	sp|O23290|RL36A_ARATH 60S ribosomal protein L36a OS=Arabidopsis thaliana OX=3702 GN=RPL36AA PE=3 SV=3	74.2003	HORVU5Hr1G081590.1;HORVU5Hr1G101600.1;HORVU7Hr1G104300.1;HORVU2Hr1G045920.1	4	HORVU2Hr1G045920.1 HORVU2Hr1G045920	chr2H:242047594-242049629	HC_G	60S ribosomal protein L44	GO:0003735, GO:0005622, GO:0005840, GO:0006412	PF00935	IPR000552, IPR011332	3	NA	3.42284e-14	0.0998896	0.15008	0.163894	0.275468	0.314833	0.36789	0.757182	3.88234e-14	0.268779	0.999981	0.835875	0.514869	0.987073	0.999388	0.887634	0	1.15519	0	0.392575	505
	eL30_RPL30C	AT3G18740	sp|Q9LSA3|RL303_ARATH 60S ribosomal protein L30-3 OS=Arabidopsis thaliana OX=3702 GN=RPL30C PE=3 SV=1	74.1731	HORVU0Hr1G023290.1;HORVU1Hr1G068640.1	2	HORVU1Hr1G068640.1 HORVU1Hr1G068640	chr1H:481938187-481940361	HC_G	60S ribosomal protein L30	none	PF01248	IPR004038, IPR022991, IPR029064	3	NA	1.54382e-17	0.000443122	0.863795	0.544083	0.581361	0.616471	0.460692	0.0122307	2.84907e-17	0.00696656	0.999981	0.930787	0.746751	0.987073	0.999388	0.327612	0.0389744	0.401794	0	1.01636	400
	IF4E1	AT4G18040	sp|O23252|IF4E1_ARATH Eukaryotic translation initiation factor 4E-1 OS=Arabidopsis thaliana OX=3702 GN=EIF4E1 PE=1 SV=1	74.1309	HORVU3Hr1G113940.1	1	HORVU3Hr1G113940.1 HORVU3Hr1G113940	chr3H:689854512-689861683	HC_G	eukaryotic translation initiation factor 4E	GO:0003723, GO:0003743, GO:0005737, GO:0006413	PF01652	IPR001040, IPR019770, IPR023398	5	NA	3.00811e-17	0.318266	0.887969	0.515136	0.120575	0.677654	0.297993	0.0315567	5.12493e-17	0.525483	0.999981	0.917933	0.324639	0.987073	0.999388	0.350134	0	0.4301	0	1.06797	1284
	P1/P2_RPP2A	AT2G27720	sp|P51407|RLA21_ARATH 60S acidic ribosomal protein P2-1 OS=Arabidopsis thaliana OX=3702 GN=RPP2A PE=3 SV=2	64.4305	HORVU1Hr1G073640.1	1	HORVU1Hr1G073640.1 HORVU1Hr1G073640	chr1H:504078029-504080009	HC_G	60S acidic ribosomal protein family	none	PF00428	none	3	NA	1.28916e-11	0.736821	0.28574	0.308423	0.644031	0.293886	0.844954	0.0663813	1.33706e-11	0.844218	0.999981	0.84842	0.79059	0.987073	0.999388	0.384855	0	0.377163	0	0.897041	550
	uS19_RPS15D	AT5G09510	sp|Q9FY64|RS154_ARATH 40S ribosomal protein S15-4 OS=Arabidopsis thaliana OX=3702 GN=RPS15D PE=2 SV=1	63.3909	HORVU2Hr1G057430.1	1	HORVU2Hr1G057430.1 HORVU2Hr1G057430	chr2H:368188284-368191697	HC_G	30S ribosomal protein S19	GO:0003723, GO:0003735, GO:0005840, GO:0006412, GO:0015935	PF00203	IPR002222, IPR005713, IPR020934, IPR023575	3	NA	2.27776e-15	0.00156133	0.223417	0.118152	0.549662	0.871302	0.925291	0.0411278	2.83892e-15	0.0174701	0.999981	0.835875	0.72885	0.987073	0.999388	0.357208	0	0.30615	0	0.544111	443
	AtTIF3A1	AT4G11420	sp|Q9LD55|EIF3A_ARATH Eukaryotic translation initiation factor 3 subunit A OS=Arabidopsis thaliana OX=3702 GN=TIF3A1 PE=1 SV=1	62.9314	HORVU3Hr1G006000.1	1	HORVU3Hr1G006000.1 HORVU3Hr1G006000	chr3H:14947387-14955556	HC_G	Eukaryotic translation initiation factor 3 subunit A	GO:0005515, GO:0005852	PF01399	IPR000717, IPR027512	5	X183	6.28077e-17	0.0593603	0.914215	0.735486	0.972655	0.753343	0.958855	0.528299	9.89938e-17	0.19538	0.999981	0.968725	0.987765	0.987073	0.999388	0.767424	0	1.26852	0	1.10221	1393
	eL6_RPL6C	AT1G74050	sp|Q9C9C5|RL63_ARATH 60S ribosomal protein L6-3 OS=Arabidopsis thaliana OX=3702 GN=RPL6C PE=2 SV=1	50.326	HORVU6Hr1G041750.3	1	HORVU6Hr1G041750.3 HORVU6Hr1G041750	chr6H:230689978-230691486	HC_G	60S ribosomal protein L6	GO:0003735, GO:0005622, GO:0005840, GO:0006412	PF01159	IPR000915, IPR008991, IPR014722	3	X151	2.69135e-19	0.000575884	0.396721	0.0969911	0.498043	0.39533	0.341655	0.0738817	1.16876e-18	0.00818985	0.999981	0.835875	0.690673	0.987073	0.999388	0.395658	0.0387692	0.978963	0	0.904719	427
	eS17_RPS17D	AT5G04800	sp|Q9LZ17|RS174_ARATH 40S ribosomal protein S17-4 OS=Arabidopsis thaliana OX=3702 GN=RPS17D PE=2 SV=3	41.5211	HORVU1Hr1G042220.1	1	HORVU1Hr1G042220.1 HORVU1Hr1G042220	chr1H:304750798-304752518	HC_G	40S ribosomal protein S17-4	GO:0003735, GO:0005622, GO:0005840, GO:0006412	PF00833	IPR001210	3	NA	1.41576e-17	0.0489904	0.137752	0.107608	0.0814967	0.235897	0.419694	0.00365199	2.64021e-17	0.177481	0.999981	0.835875	0.269558	0.987073	0.999388	0.307165	0	0.520118	0	1.46576	355
	P1/P2_RPP1B	AT4G00810	sp|O23095|RLA12_ARATH 60S acidic ribosomal protein P1-2 OS=Arabidopsis thaliana OX=3702 GN=RPP1B PE=1 SV=2	39.353	HORVU7Hr1G075360.2	1	HORVU7Hr1G075360.2 HORVU7Hr1G075360	chr7H:436441515-436442702	HC_G	60S acidic ribosomal protein family	GO:0003735, GO:0005622, GO:0005840, GO:0006412	PF00428	IPR001859	3	NA	2.376e-09	0.301775	0.205307	0.50818	0.335449	0.162751	0.711692	0.0864029	2.40505e-09	0.509245	0.999981	0.913366	0.560722	0.987073	0.999388	0.417031	0	0.480345	0	0.659603	549
	IF4E4	AT5G35620	sp|O04663|IF4E4_ARATH Eukaryotic translation initiation factor isoform 4E OS=Arabidopsis thaliana OX=3702 GN=EIF(ISO)4E PE=1 SV=2	22.8545	HORVU1Hr1G039260.2	1	HORVU1Hr1G039260.2 HORVU1Hr1G039260	chr1H:275290251-275294068	HC_G	eukaryotic translation initiation factor 4E	GO:0003723, GO:0003743, GO:0005737, GO:0006413	PF01652	IPR001040, IPR019770, IPR023398	3	NA	4.98524e-17	0.0164113	0.551639	0.116968	0.38075	0.960173	0.573082	0.00353158	7.99441e-17	0.0886208	0.999981	0.835875	0.601643	0.99798	0.999388	0.307165	0	1.11607	0	0.536534	365
	eS24_RPS24A	AT3G04920	sp|Q9SS17|RS241_ARATH 40S ribosomal protein S24-1 OS=Arabidopsis thaliana OX=3702 GN=RPS24A PE=2 SV=1	17.4926	HORVU7Hr1G088580.1;HORVU2Hr1G055560.1	2	HORVU2Hr1G055560.1 HORVU2Hr1G055560	chr2H:345142696-345144581	HC_G	40S ribosomal protein S24-2	GO:0000166, GO:0003735, GO:0005622, GO:0005840, GO:0006412	PF01282	IPR001976, IPR012677, IPR012678, IPR018098	3	X471	1.26133e-17	0.0430312	0.259311	0.0831645	0.854681	0.422636	0.243397	0.357102	2.39536e-17	0.164699	0.999981	0.835875	0.919041	0.987073	0.999388	0.654062	0	0.314457	0	0.858772	376
	tRNA-V	AT1G69410	sp|P93736|SYVM1_ARATH Valine--tRNA ligase, mitochondrial 1 OS=Arabidopsis thaliana OX=3702 GN=TWN2 PE=1 SV=2	12.4383	HORVU3Hr1G022350.3	1	HORVU3Hr1G022350.3 HORVU3Hr1G022350	chr3H:78933756-79045796	HC_G	Valine--tRNA ligase	GO:0000166, GO:0002161, GO:0004812, GO:0004832, GO:0005524, GO:0006418, GO:0006438	PF00133	IPR001412, IPR002300, IPR002303, IPR009008, IPR009080, IPR014729	5	X183	4.77876e-18	0.062131	0.794014	0.995805	0.631941	0.618183	0.979153	0.286257	1.04955e-17	0.200955	0.999981	0.997681	0.783304	0.987073	0.999388	0.605674	0	0.505797	0	1.18725	1395
	uS9_RPS16A	AT2G09990	sp|Q9SK22|RS161_ARATH 40S ribosomal protein S16-1 OS=Arabidopsis thaliana OX=3702 GN=RPS16A PE=2 SV=1	10.9894	HORVU4Hr1G023530.1;HORVU4Hr1G023570.2	2	HORVU4Hr1G023570.2 HORVU4Hr1G023570	chr4H:129094028-129096697	HC_G	30S ribosomal protein S9	GO:0003735, GO:0005840, GO:0006412	PF00380	IPR000754, IPR014721, IPR020568, IPR020574	3	NA	1.93698e-17	0.000175563	0.467351	0.197888	0.0247843	0.552558	0.460801	0.776184	3.4565e-17	0.0034888	0.999981	0.835875	0.131541	0.987073	0.999388	0.897048	0.0771282	1.22672	0	0.777454	386
	uS2_RPSaA	AT1G72370	sp|Q08682|RSSA1_ARATH 40S ribosomal protein Sa-1 OS=Arabidopsis thaliana OX=3702 GN=RPSaA PE=1 SV=3	10.7369	HORVU4Hr1G077240.1	1	HORVU4Hr1G077240.1 HORVU4Hr1G077240	chr4H:603597180-603599447	HC_G	40s ribosomal protein SA	GO:0003735, GO:0005622, GO:0005840, GO:0006412, GO:0015935	PF00318	IPR001865, IPR005707, IPR018130, IPR023591, IPR027498	3	NA	6.91883e-19	5.1066e-05	0.724785	0.376617	0.724655	0.899409	0.730805	0.098345	2.28239e-18	0.00140942	0.999981	0.862391	0.847172	0.987073	0.999388	0.431606	0.270359	1.69899	0	0.841958	356
	eL27_RPL27C	AT4G15000	sp|P51419|RL273_ARATH 60S ribosomal protein L27-3 OS=Arabidopsis thaliana OX=3702 GN=RPL27C PE=2 SV=2	8.43394	HORVU7Hr1G063280.1;HORVU5Hr1G054100.1;HORVU2Hr1G086470.1;HORVU2Hr1G086480.1;HORVU5Hr1G054090.1;HORVU5Hr1G054130.1;HORVU5Hr1G054120.1;HORVU5Hr1G054110.2;HORVU2Hr1G086450.1	2	HORVU5Hr1G054100.1 HORVU5Hr1G054100	chr5H:424942737-424943147	HC_G	60S ribosomal protein L27-3	GO:0003735, GO:0005622, GO:0005840, GO:0006412	PF00467, PF01777	IPR001141, IPR005824, IPR008991, IPR014722	3	NA	1.58829e-18	2.05555e-05	0.185627	0.0336241	0.920406	0.292705	0.152071	0.828145	4.34799e-18	0.000751087	0.999981	0.835875	0.956858	0.987073	0.999388	0.923847	0.154051	1.17217	0	0.822033	490
	eL27_RPL27C	AT4G15000	sp|P51419|RL273_ARATH 60S ribosomal protein L27-3 OS=Arabidopsis thaliana OX=3702 GN=RPL27C PE=2 SV=2	8.43394	HORVU7Hr1G063280.1;HORVU5Hr1G054100.1;HORVU2Hr1G086470.1;HORVU2Hr1G086480.1;HORVU5Hr1G054090.1;HORVU5Hr1G054130.1;HORVU5Hr1G054120.1;HORVU5Hr1G054110.2;HORVU2Hr1G086450.1	5	HORVU5Hr1G054090.1 HORVU5Hr1G054090	chr5H:424928968-424929378	HC_G	60S ribosomal protein L27-3	GO:0003735, GO:0005622, GO:0005840, GO:0006412	PF00467, PF01777	IPR001141, IPR005824, IPR008991, IPR014722	3	NA	1.58829e-18	2.05555e-05	0.185627	0.0336241	0.920406	0.292705	0.152071	0.828145	4.34799e-18	0.000751087	0.999981	0.835875	0.956858	0.987073	0.999388	0.923847	0.154051	1.17217	0	0.822033	490
	eL27_RPL27C	AT4G15000	sp|P51419|RL273_ARATH 60S ribosomal protein L27-3 OS=Arabidopsis thaliana OX=3702 GN=RPL27C PE=2 SV=2	8.43394	HORVU7Hr1G063280.1;HORVU5Hr1G054100.1;HORVU2Hr1G086470.1;HORVU2Hr1G086480.1;HORVU5Hr1G054090.1;HORVU5Hr1G054130.1;HORVU5Hr1G054120.1;HORVU5Hr1G054110.2;HORVU2Hr1G086450.1	6	HORVU5Hr1G054130.1 HORVU5Hr1G054130	chr5H:425072368-425072778	HC_G	60S ribosomal protein L27-3	GO:0003735, GO:0005622, GO:0005840, GO:0006412	PF00467, PF01777	IPR001141, IPR005824, IPR008991, IPR014722	3	NA	1.58829e-18	2.05555e-05	0.185627	0.0336241	0.920406	0.292705	0.152071	0.828145	4.34799e-18	0.000751087	0.999981	0.835875	0.956858	0.987073	0.999388	0.923847	0.154051	1.17217	0	0.822033	490
	eL27_RPL27C	AT4G15000	sp|P51419|RL273_ARATH 60S ribosomal protein L27-3 OS=Arabidopsis thaliana OX=3702 GN=RPL27C PE=2 SV=2	8.43394	HORVU7Hr1G063280.1;HORVU5Hr1G054100.1;HORVU2Hr1G086470.1;HORVU2Hr1G086480.1;HORVU5Hr1G054090.1;HORVU5Hr1G054130.1;HORVU5Hr1G054120.1;HORVU5Hr1G054110.2;HORVU2Hr1G086450.1	8	HORVU5Hr1G054110.2 HORVU5Hr1G054110	chr5H:424999220-424999630	HC_G	60S ribosomal protein L27-3	GO:0003735, GO:0005622, GO:0005840, GO:0006412	PF00467, PF01777	IPR001141, IPR005824, IPR008991, IPR014722	3	NA	1.58829e-18	2.05555e-05	0.185627	0.0336241	0.920406	0.292705	0.152071	0.828145	4.34799e-18	0.000751087	0.999981	0.835875	0.956858	0.987073	0.999388	0.923847	0.154051	1.17217	0	0.822033	490
	eL27_RPL27B	AT3G22230	sp|Q8LCL3|RL272_ARATH 60S ribosomal protein L27-2 OS=Arabidopsis thaliana OX=3702 GN=RPL27B PE=2 SV=2	6.8759	HORVU7Hr1G063280.1;HORVU5Hr1G054100.1;HORVU2Hr1G086470.1;HORVU2Hr1G086480.1;HORVU5Hr1G054090.1;HORVU5Hr1G054130.1;HORVU5Hr1G054120.1;HORVU5Hr1G054110.2;HORVU2Hr1G086450.1	7	HORVU5Hr1G054120.1 HORVU5Hr1G054120	chr5H:425018974-425019884	HC_G	60S ribosomal protein L27-3	GO:0003735, GO:0005622, GO:0005840, GO:0006412	PF00467, PF01777	IPR001141, IPR005824, IPR008991, IPR014722	3	NA	1.58829e-18	2.05555e-05	0.185627	0.0336241	0.920406	0.292705	0.152071	0.828145	4.34799e-18	0.000751087	0.999981	0.835875	0.956858	0.987073	0.999388	0.923847	0.154051	1.17217	0	0.822033	490
	RPL14/ HLP	AT5G46160	sp|Q93Z17|HLP_ARATH 50S ribosomal protein HLP, mitochondrial OS=Arabidopsis thaliana OX=3702 GN=HLP PE=2 SV=1	4.51957	HORVU5Hr1G008710.2;HORVU2Hr1G122020.5;HORVU4Hr1G039710.6;HORVU5Hr1G030940.1	3	HORVU4Hr1G039710.6 HORVU4Hr1G039710	chr4H:304466948-304468072	HC_G	50S ribosomal protein L14	GO:0003735, GO:0005840, GO:0006412, GO:0015934	PF00238	IPR000218, IPR005745, IPR019972, IPR023571	5	NA	7.05746e-19	0.624556	0.918215	0.454712	0.286539	0.481755	0.418757	0.394515	2.31582e-18	0.776475	0.999981	0.898555	0.5249	0.987073	0.999388	0.681484	0	0.544	0	0.699915	2014
	_	AT4G11120	sp|Q5XF75|EFTS_ARATH Elongation factor Ts, mitochondrial OS=Arabidopsis thaliana OX=3702 GN=EFTS PE=1 SV=1	2.68413	HORVU7Hr1G080870.4	1	HORVU7Hr1G080870.4 HORVU7Hr1G080870	chr7H:480343502-480353883	HC_G	Elongation factor Ts	GO:0003746, GO:0005515, GO:0005622, GO:0006414	PF00889	IPR001816, IPR009060, IPR014039, IPR018101	5	NA	2.82108e-16	0.438007	0.461222	0.204695	0.292664	0.469568	0.422922	0.0487149	3.94908e-16	0.644597	0.999981	0.835875	0.532585	0.987073	0.999388	0.370291	0	1.56277	0	0.979303	1580
	eL6_RPL6C	AT1G74050	sp|Q9C9C5|RL63_ARATH 60S ribosomal protein L6-3 OS=Arabidopsis thaliana OX=3702 GN=RPL6C PE=2 SV=1	-6.08327	HORVU6Hr1G052600.3	1	HORVU6Hr1G052600.3 HORVU6Hr1G052600	chr6H:325194479-325196297	HC_G	60S ribosomal protein L6	GO:0003735, GO:0005622, GO:0005840, GO:0006412	PF01159	IPR000915, IPR008991, IPR014722	3	X59	4.19497e-14	0.000992195	0.507807	0.208178	0.809724	0.659732	0.885003	0.243123	4.71934e-14	0.0122617	0.999981	0.835875	0.897067	0.987073	0.999388	0.569196	0.0389744	0.834945	0	0.5217	434
	RPL3/ RPL3P	AT3G17465	sp|Q9LRN8|RK3B_ARATH 50S ribosomal protein L3-2, mitochondrial OS=Arabidopsis thaliana OX=3702 GN=RPL3B PE=2 SV=1	-21.75	HORVU3Hr1G034240.1	1	HORVU3Hr1G034240.1 HORVU3Hr1G034240	chr3H:185394149-185399374	HC_G	50S ribosomal protein L3	GO:0003735, GO:0005622, GO:0005840, GO:0006412	PF00297	IPR000597, IPR009000, IPR019926, IPR019927	5	NA	2.15812e-20	0.0948609	0.595914	0.378838	0.178003	0.371371	0.643625	0.0613018	2.60231e-19	0.260082	0.999981	0.862391	0.411693	0.987073	0.999388	0.379323	0	0.776957	0	0.814763	1406
	uS14_RPS29A,uS14_RPS29B,uS14_RPS29C	AT3G43980,AT3G44010,AT4G33865	sp|Q680P8|RS29_ARATH 40S ribosomal protein S29 OS=Arabidopsis thaliana OX=3702 GN=RPS29A PE=3 SV=2	-42.0426	HORVU5Hr1G098740.1;HORVU0Hr1G011940.3;HORVU4Hr1G037800.1	3	HORVU4Hr1G037800.1 HORVU4Hr1G037800	chr4H:283160649-283165467	HC_G	40S ribosomal protein S29	GO:0003723, GO:0003735, GO:0005622, GO:0005840, GO:0006412, GO:0015935	PF00253	IPR001209, IPR023676	3	NA	1.67766e-17	0.0897746	0.552457	0.169812	0.149197	0.462792	0.82164	0.00329664	3.07098e-17	0.251693	0.999981	0.835875	0.374315	0.987073	0.999388	0.307165	0	0.0441233	0	1.36523	335
	P1/P2_RPP3B	AT5G57290	sp|Q9LVC9|RLA32_ARATH 60S acidic ribosomal protein P3-2 OS=Arabidopsis thaliana OX=3702 GN=RPP3B PE=2 SV=1	-76.7989	HORVU7Hr1G096990.2	1	HORVU7Hr1G096990.2 HORVU7Hr1G096990	chr7H:590486141-590487662	HC_G	60S acidic ribosomal protein family	GO:0003735, GO:0005622, GO:0005840, GO:0006414	PF00428	IPR027534	3	NA	1.26041e-13	0.105403	0.181583	0.093728	0.609284	0.811227	0.954053	0.0584644	1.38533e-13	0.276474	0.999981	0.835875	0.768645	0.987073	0.999388	0.377593	0	1.66247	0	0.949416	585
	uS12c_RPS12,uS12c_RPS12,bS16c_RPS16	ATCG00905,ATCG01230,ATCG00065	sp|P62126|RR12_ARATH 30S ribosomal protein S12, chloroplastic OS=Arabidopsis thaliana OX=3702 GN=rps12-A PE=2 SV=2	-84.9231	HORVU3Hr1G004730.1;HORVU3Hr1G004570.1;HORVU0Hr1G037680.1;HORVU7Hr1G076970.1;HORVU6Hr1G049530.1;HORVU5Hr1G064860.1;HORVU2Hr1G121890.1;HORVU2Hr1G070510.1;HORVU2Hr1G030350.1;HORVU1Hr1G014050.1;HORVU0Hr1G034790.1;HORVU0Hr1G032570.1;HORVU0Hr1G031300.1;HORVU0Hr1G024920.1;HORVU3Hr1G044580.1	4	HORVU7Hr1G076970.1 HORVU7Hr1G076970	chr7H:449967657-449967809	HC_G	30S ribosomal protein S12	GO:0003735, GO:0005622, GO:0005840, GO:0006412, GO:0015935	PF00164	IPR005679, IPR006032, IPR012340	4	NA	2.77505e-07	0.0557151	0.74745	0.232613	0.542086	0.425106	0.50074	0.091298	2.78852e-07	0.188551	0.999981	0.840832	0.727074	0.987073	0.999388	0.423165	0	0.361696	0	0.944106	1173
	uS12c_RPS12,uS12c_RPS12,bS16c_RPS16	ATCG00905,ATCG01230,ATCG00065	sp|P62126|RR12_ARATH 30S ribosomal protein S12, chloroplastic OS=Arabidopsis thaliana OX=3702 GN=rps12-A PE=2 SV=2	-84.9231	HORVU3Hr1G004730.1;HORVU3Hr1G004570.1;HORVU0Hr1G037680.1;HORVU7Hr1G076970.1;HORVU6Hr1G049530.1;HORVU5Hr1G064860.1;HORVU2Hr1G121890.1;HORVU2Hr1G070510.1;HORVU2Hr1G030350.1;HORVU1Hr1G014050.1;HORVU0Hr1G034790.1;HORVU0Hr1G032570.1;HORVU0Hr1G031300.1;HORVU0Hr1G024920.1;HORVU3Hr1G044580.1	5	HORVU6Hr1G049530.1 HORVU6Hr1G049530	chr6H:299550553-299550705	HC_G	30S ribosomal protein S12	GO:0003735, GO:0005622, GO:0005840, GO:0006412, GO:0015935	PF00164	IPR005679, IPR006032, IPR012340	4	NA	2.77505e-07	0.0557151	0.74745	0.232613	0.542086	0.425106	0.50074	0.091298	2.78852e-07	0.188551	0.999981	0.840832	0.727074	0.987073	0.999388	0.423165	0	0.361696	0	0.944106	1173
	uS12c_RPS12,uS12c_RPS12,bS16c_RPS16	ATCG00905,ATCG01230,ATCG00065	sp|P62126|RR12_ARATH 30S ribosomal protein S12, chloroplastic OS=Arabidopsis thaliana OX=3702 GN=rps12-A PE=2 SV=2	-84.9231	HORVU3Hr1G004730.1;HORVU3Hr1G004570.1;HORVU0Hr1G037680.1;HORVU7Hr1G076970.1;HORVU6Hr1G049530.1;HORVU5Hr1G064860.1;HORVU2Hr1G121890.1;HORVU2Hr1G070510.1;HORVU2Hr1G030350.1;HORVU1Hr1G014050.1;HORVU0Hr1G034790.1;HORVU0Hr1G032570.1;HORVU0Hr1G031300.1;HORVU0Hr1G024920.1;HORVU3Hr1G044580.1	6	HORVU5Hr1G064860.1 HORVU5Hr1G064860	chr5H:498717766-498717918	HC_G	30S ribosomal protein S12	GO:0003735, GO:0005622, GO:0005840, GO:0006412, GO:0015935	PF00164	IPR005679, IPR006032, IPR012340	4	NA	2.77505e-07	0.0557151	0.74745	0.232613	0.542086	0.425106	0.50074	0.091298	2.78852e-07	0.188551	0.999981	0.840832	0.727074	0.987073	0.999388	0.423165	0	0.361696	0	0.944106	1173
	uS12c_RPS12,uS12c_RPS12,bS16c_RPS16	ATCG00905,ATCG01230,ATCG00065	sp|P62126|RR12_ARATH 30S ribosomal protein S12, chloroplastic OS=Arabidopsis thaliana OX=3702 GN=rps12-A PE=2 SV=2	-84.9231	HORVU3Hr1G004730.1;HORVU3Hr1G004570.1;HORVU0Hr1G037680.1;HORVU7Hr1G076970.1;HORVU6Hr1G049530.1;HORVU5Hr1G064860.1;HORVU2Hr1G121890.1;HORVU2Hr1G070510.1;HORVU2Hr1G030350.1;HORVU1Hr1G014050.1;HORVU0Hr1G034790.1;HORVU0Hr1G032570.1;HORVU0Hr1G031300.1;HORVU0Hr1G024920.1;HORVU3Hr1G044580.1	7	HORVU2Hr1G121890.1 HORVU2Hr1G121890	chr2H:751794022-751794174	HC_G	30S ribosomal protein S12	GO:0003735, GO:0005622, GO:0005840, GO:0006412, GO:0015935	PF00164	IPR005679, IPR006032, IPR012340	4	NA	2.77505e-07	0.0557151	0.74745	0.232613	0.542086	0.425106	0.50074	0.091298	2.78852e-07	0.188551	0.999981	0.840832	0.727074	0.987073	0.999388	0.423165	0	0.361696	0	0.944106	1173
	uS12c_RPS12,uS12c_RPS12,bS16c_RPS16	ATCG00905,ATCG01230,ATCG00065	sp|P62126|RR12_ARATH 30S ribosomal protein S12, chloroplastic OS=Arabidopsis thaliana OX=3702 GN=rps12-A PE=2 SV=2	-84.9231	HORVU3Hr1G004730.1;HORVU3Hr1G004570.1;HORVU0Hr1G037680.1;HORVU7Hr1G076970.1;HORVU6Hr1G049530.1;HORVU5Hr1G064860.1;HORVU2Hr1G121890.1;HORVU2Hr1G070510.1;HORVU2Hr1G030350.1;HORVU1Hr1G014050.1;HORVU0Hr1G034790.1;HORVU0Hr1G032570.1;HORVU0Hr1G031300.1;HORVU0Hr1G024920.1;HORVU3Hr1G044580.1	8	HORVU2Hr1G070510.1 HORVU2Hr1G070510	chr2H:497981394-497981546	HC_G	30S ribosomal protein S12	GO:0003735, GO:0005622, GO:0005840, GO:0006412, GO:0015935	PF00164	IPR005679, IPR006032, IPR012340	4	NA	2.77505e-07	0.0557151	0.74745	0.232613	0.542086	0.425106	0.50074	0.091298	2.78852e-07	0.188551	0.999981	0.840832	0.727074	0.987073	0.999388	0.423165	0	0.361696	0	0.944106	1173
	uS12c_RPS12,uS12c_RPS12,bS16c_RPS16	ATCG00905,ATCG01230,ATCG00065	sp|P62126|RR12_ARATH 30S ribosomal protein S12, chloroplastic OS=Arabidopsis thaliana OX=3702 GN=rps12-A PE=2 SV=2	-84.9231	HORVU3Hr1G004730.1;HORVU3Hr1G004570.1;HORVU0Hr1G037680.1;HORVU7Hr1G076970.1;HORVU6Hr1G049530.1;HORVU5Hr1G064860.1;HORVU2Hr1G121890.1;HORVU2Hr1G070510.1;HORVU2Hr1G030350.1;HORVU1Hr1G014050.1;HORVU0Hr1G034790.1;HORVU0Hr1G032570.1;HORVU0Hr1G031300.1;HORVU0Hr1G024920.1;HORVU3Hr1G044580.1	9	HORVU2Hr1G030350.1 HORVU2Hr1G030350	chr2H:111594831-111594983	HC_G	30S ribosomal protein S12	GO:0003735, GO:0005622, GO:0005840, GO:0006412, GO:0015935	PF00164	IPR005679, IPR006032, IPR012340	4	NA	2.77505e-07	0.0557151	0.74745	0.232613	0.542086	0.425106	0.50074	0.091298	2.78852e-07	0.188551	0.999981	0.840832	0.727074	0.987073	0.999388	0.423165	0	0.361696	0	0.944106	1173
	uS12c_RPS12,uS12c_RPS12,bS16c_RPS16	ATCG00905,ATCG01230,ATCG00065	sp|P62126|RR12_ARATH 30S ribosomal protein S12, chloroplastic OS=Arabidopsis thaliana OX=3702 GN=rps12-A PE=2 SV=2	-84.9231	HORVU3Hr1G004730.1;HORVU3Hr1G004570.1;HORVU0Hr1G037680.1;HORVU7Hr1G076970.1;HORVU6Hr1G049530.1;HORVU5Hr1G064860.1;HORVU2Hr1G121890.1;HORVU2Hr1G070510.1;HORVU2Hr1G030350.1;HORVU1Hr1G014050.1;HORVU0Hr1G034790.1;HORVU0Hr1G032570.1;HORVU0Hr1G031300.1;HORVU0Hr1G024920.1;HORVU3Hr1G044580.1	10	HORVU1Hr1G014050.1 HORVU1Hr1G014050	chr1H:38810334-38810486	HC_G	30S ribosomal protein S12	GO:0003735, GO:0005622, GO:0005840, GO:0006412, GO:0015935	PF00164	IPR005679, IPR006032, IPR012340	4	NA	2.77505e-07	0.0557151	0.74745	0.232613	0.542086	0.425106	0.50074	0.091298	2.78852e-07	0.188551	0.999981	0.840832	0.727074	0.987073	0.999388	0.423165	0	0.361696	0	0.944106	1173
	uS12c_RPS12,uS12c_RPS12,bS16c_RPS16	ATCG00905,ATCG01230,ATCG00065	sp|P62126|RR12_ARATH 30S ribosomal protein S12, chloroplastic OS=Arabidopsis thaliana OX=3702 GN=rps12-A PE=2 SV=2	-84.9231	HORVU3Hr1G004730.1;HORVU3Hr1G004570.1;HORVU0Hr1G037680.1;HORVU7Hr1G076970.1;HORVU6Hr1G049530.1;HORVU5Hr1G064860.1;HORVU2Hr1G121890.1;HORVU2Hr1G070510.1;HORVU2Hr1G030350.1;HORVU1Hr1G014050.1;HORVU0Hr1G034790.1;HORVU0Hr1G032570.1;HORVU0Hr1G031300.1;HORVU0Hr1G024920.1;HORVU3Hr1G044580.1	11	HORVU0Hr1G034790.1 HORVU0Hr1G034790	chrUn:206047600-206047752	HC_G	30S ribosomal protein S12	GO:0003735, GO:0005622, GO:0005840, GO:0006412, GO:0015935	PF00164	IPR005679, IPR006032, IPR012340	4	NA	2.77505e-07	0.0557151	0.74745	0.232613	0.542086	0.425106	0.50074	0.091298	2.78852e-07	0.188551	0.999981	0.840832	0.727074	0.987073	0.999388	0.423165	0	0.361696	0	0.944106	1173
	uS12c_RPS12,uS12c_RPS12,bS16c_RPS16	ATCG00905,ATCG01230,ATCG00065	sp|P62126|RR12_ARATH 30S ribosomal protein S12, chloroplastic OS=Arabidopsis thaliana OX=3702 GN=rps12-A PE=2 SV=2	-84.9231	HORVU3Hr1G004730.1;HORVU3Hr1G004570.1;HORVU0Hr1G037680.1;HORVU7Hr1G076970.1;HORVU6Hr1G049530.1;HORVU5Hr1G064860.1;HORVU2Hr1G121890.1;HORVU2Hr1G070510.1;HORVU2Hr1G030350.1;HORVU1Hr1G014050.1;HORVU0Hr1G034790.1;HORVU0Hr1G032570.1;HORVU0Hr1G031300.1;HORVU0Hr1G024920.1;HORVU3Hr1G044580.1	12	HORVU0Hr1G032570.1 HORVU0Hr1G032570	chrUn:194950417-194950569	HC_G	30S ribosomal protein S12	GO:0003735, GO:0005622, GO:0005840, GO:0006412, GO:0015935	PF00164	IPR005679, IPR006032, IPR012340	4	NA	2.77505e-07	0.0557151	0.74745	0.232613	0.542086	0.425106	0.50074	0.091298	2.78852e-07	0.188551	0.999981	0.840832	0.727074	0.987073	0.999388	0.423165	0	0.361696	0	0.944106	1173
	uS12c_RPS12,uS12c_RPS12,bS16c_RPS16	ATCG00905,ATCG01230,ATCG00065	sp|P62126|RR12_ARATH 30S ribosomal protein S12, chloroplastic OS=Arabidopsis thaliana OX=3702 GN=rps12-A PE=2 SV=2	-84.9231	HORVU3Hr1G004730.1;HORVU3Hr1G004570.1;HORVU0Hr1G037680.1;HORVU7Hr1G076970.1;HORVU6Hr1G049530.1;HORVU5Hr1G064860.1;HORVU2Hr1G121890.1;HORVU2Hr1G070510.1;HORVU2Hr1G030350.1;HORVU1Hr1G014050.1;HORVU0Hr1G034790.1;HORVU0Hr1G032570.1;HORVU0Hr1G031300.1;HORVU0Hr1G024920.1;HORVU3Hr1G044580.1	13	HORVU0Hr1G031300.1 HORVU0Hr1G031300	chrUn:186682947-186683099	HC_G	30S ribosomal protein S12	GO:0003735, GO:0005622, GO:0005840, GO:0006412, GO:0015935	PF00164	IPR005679, IPR006032, IPR012340	4	NA	2.77505e-07	0.0557151	0.74745	0.232613	0.542086	0.425106	0.50074	0.091298	2.78852e-07	0.188551	0.999981	0.840832	0.727074	0.987073	0.999388	0.423165	0	0.361696	0	0.944106	1173
	uS12c_RPS12,uS12c_RPS12,bS16c_RPS16	ATCG00905,ATCG01230,ATCG00065	sp|P62126|RR12_ARATH 30S ribosomal protein S12, chloroplastic OS=Arabidopsis thaliana OX=3702 GN=rps12-A PE=2 SV=2	-84.9231	HORVU3Hr1G004730.1;HORVU3Hr1G004570.1;HORVU0Hr1G037680.1;HORVU7Hr1G076970.1;HORVU6Hr1G049530.1;HORVU5Hr1G064860.1;HORVU2Hr1G121890.1;HORVU2Hr1G070510.1;HORVU2Hr1G030350.1;HORVU1Hr1G014050.1;HORVU0Hr1G034790.1;HORVU0Hr1G032570.1;HORVU0Hr1G031300.1;HORVU0Hr1G024920.1;HORVU3Hr1G044580.1	14	HORVU0Hr1G024920.1 HORVU0Hr1G024920	chrUn:127960935-127961087	HC_G	30S ribosomal protein S12	GO:0003735, GO:0005622, GO:0005840, GO:0006412, GO:0015935	PF00164	IPR005679, IPR006032, IPR012340	4	NA	2.77505e-07	0.0557151	0.74745	0.232613	0.542086	0.425106	0.50074	0.091298	2.78852e-07	0.188551	0.999981	0.840832	0.727074	0.987073	0.999388	0.423165	0	0.361696	0	0.944106	1173
	RPL14/ HLP	AT5G46160	sp|Q93Z17|HLP_ARATH 50S ribosomal protein HLP, mitochondrial OS=Arabidopsis thaliana OX=3702 GN=HLP PE=2 SV=1	-90.4322	HORVU5Hr1G008710.2;HORVU2Hr1G122020.5;HORVU4Hr1G039710.6;HORVU5Hr1G030940.1	1	HORVU5Hr1G008710.2 HORVU5Hr1G008710	chr5H:19788298-19791532	HC_G	50S ribosomal protein L14	GO:0003735, GO:0005840, GO:0006412, GO:0015934	PF00238	IPR000218, IPR005745, IPR019972, IPR023571	5	NA	7.05746e-19	0.624556	0.918215	0.454712	0.286539	0.481755	0.418757	0.394515	2.31582e-18	0.776475	0.999981	0.898555	0.5249	0.987073	0.999388	0.681484	0	0.544	0	0.699915	2014
	RPS12_RPS7	AT2G07675,ATMG00980	sp|P92532|RT12_ARATH Ribosomal protein S12, mitochondrial OS=Arabidopsis thaliana OX=3702 GN=RPS12 PE=2 SV=2	-95.3047	HORVU3Hr1G004730.1;HORVU3Hr1G004570.1;HORVU0Hr1G037680.1;HORVU7Hr1G076970.1;HORVU6Hr1G049530.1;HORVU5Hr1G064860.1;HORVU2Hr1G121890.1;HORVU2Hr1G070510.1;HORVU2Hr1G030350.1;HORVU1Hr1G014050.1;HORVU0Hr1G034790.1;HORVU0Hr1G032570.1;HORVU0Hr1G031300.1;HORVU0Hr1G024920.1;HORVU3Hr1G044580.1	15	HORVU3Hr1G044580.1 HORVU3Hr1G044580	chr3H:287988838-287989214	HC_G	30S ribosomal protein S12	GO:0003735, GO:0005622, GO:0005840, GO:0006412, GO:0015935	PF00164	IPR005679, IPR006032, IPR012340	4	NA	2.77505e-07	0.0557151	0.74745	0.232613	0.542086	0.425106	0.50074	0.091298	2.78852e-07	0.188551	0.999981	0.840832	0.727074	0.987073	0.999388	0.423165	0	0.361696	0	0.944106	1173
	eS12_RPS12A	AT1G15930	sp|Q9S9P1|RS121_ARATH 40S ribosomal protein S12-1 OS=Arabidopsis thaliana OX=3702 GN=RPS12A PE=2 SV=1	-98.8979	HORVU5Hr1G103330.3	1	HORVU5Hr1G103330.3 HORVU5Hr1G103330	chr5H:615399144-615401415	HC_G	40S ribosomal protein S12	GO:0003735, GO:0005622, GO:0005840, GO:0006412	PF01248	IPR000530, IPR004038, IPR029064	3	NA	3.8591e-14	0.050303	0.191706	0.0620018	0.193794	0.925735	0.499504	0.0183684	4.35727e-14	0.179272	0.999981	0.835875	0.43251	0.991603	0.999388	0.327612	0	0.518574	0	1.0843	194
	RPL14/ HLP	AT5G46160	sp|Q93Z17|HLP_ARATH 50S ribosomal protein HLP, mitochondrial OS=Arabidopsis thaliana OX=3702 GN=HLP PE=2 SV=1	-104.861	HORVU5Hr1G008710.2;HORVU2Hr1G122020.5;HORVU4Hr1G039710.6;HORVU5Hr1G030940.1	4	HORVU5Hr1G030940.1 HORVU5Hr1G030940	chr5H:192355205-192356197	HC_G	50S ribosomal protein L14	GO:0003735, GO:0005840, GO:0006412	PF00238	IPR000218, IPR019972, IPR023571	5	NA	7.05746e-19	0.624556	0.918215	0.454712	0.286539	0.481755	0.418757	0.394515	2.31582e-18	0.776475	0.999981	0.898555	0.5249	0.987073	0.999388	0.681484	0	0.544	0	0.699915	2014
	uL5_RPL11A	AT2G42740	sp|P42795|RL111_ARATH 60S ribosomal protein L11-1 OS=Arabidopsis thaliana OX=3702 GN=RPL11A PE=2 SV=2	-117.006	HORVU3Hr1G026060.1;HORVU1Hr1G028820.1;HORVU0Hr1G003140.1;HORVU2Hr1G029090.3;HORVU7Hr1G044560.1;HORVU2Hr1G042010.2;HORVU2Hr1G041980.1	4	HORVU2Hr1G029090.3 HORVU2Hr1G029090	chr2H:100503659-100504445	HC_G	50S ribosomal protein L5	GO:0003735, GO:0005622, GO:0005840, GO:0006412	PF00281, PF00673	IPR020929, IPR022803, IPR031309, IPR031310	3	X410	3.97583e-17	0.000939536	0.354994	0.141172	0.853753	0.651908	0.87879	0.0847128	6.57083e-17	0.0118615	0.999981	0.835875	0.919041	0.987073	0.999388	0.412601	0	0.101333	0	1.08405	423
	RPL14/ HLP	AT5G46160	sp|Q93Z17|HLP_ARATH 50S ribosomal protein HLP, mitochondrial OS=Arabidopsis thaliana OX=3702 GN=HLP PE=2 SV=1	-128.493	HORVU5Hr1G008710.2;HORVU2Hr1G122020.5;HORVU4Hr1G039710.6;HORVU5Hr1G030940.1	2	HORVU2Hr1G122020.5 HORVU2Hr1G122020	chr2H:751896305-751898556	HC_G	50S ribosomal protein L14	GO:0003735, GO:0005840, GO:0006412, GO:0015934	PF00238	IPR000218, IPR005745, IPR019972, IPR023571	5	NA	7.05746e-19	0.624556	0.918215	0.454712	0.286539	0.481755	0.418757	0.394515	2.31582e-18	0.776475	0.999981	0.898555	0.5249	0.987073	0.999388	0.681484	0	0.544	0	0.699915	2014
	uL5_RPL11A	AT2G42740	sp|P42795|RL111_ARATH 60S ribosomal protein L11-1 OS=Arabidopsis thaliana OX=3702 GN=RPL11A PE=2 SV=2	-129.248	HORVU3Hr1G026060.1;HORVU1Hr1G028820.1;HORVU0Hr1G003140.1;HORVU2Hr1G029090.3;HORVU7Hr1G044560.1;HORVU2Hr1G042010.2;HORVU2Hr1G041980.1	5	HORVU7Hr1G044560.1 HORVU7Hr1G044560	chr7H:138894994-138895786	HC_G	50S ribosomal protein L5	GO:0003735, GO:0005622, GO:0005840, GO:0006412	PF00281, PF00673	IPR020929, IPR022803, IPR031309, IPR031310	3	X410	3.97583e-17	0.000939536	0.354994	0.141172	0.853753	0.651908	0.87879	0.0847128	6.57083e-17	0.0118615	0.999981	0.835875	0.919041	0.987073	0.999388	0.412601	0	0.101333	0	1.08405	423
	uL5_RPL11A	AT2G42740	sp|P42795|RL111_ARATH 60S ribosomal protein L11-1 OS=Arabidopsis thaliana OX=3702 GN=RPL11A PE=2 SV=2	-139.865	HORVU3Hr1G026060.1;HORVU1Hr1G028820.1;HORVU0Hr1G003140.1;HORVU2Hr1G029090.3;HORVU7Hr1G044560.1;HORVU2Hr1G042010.2;HORVU2Hr1G041980.1	6	HORVU2Hr1G042010.2 HORVU2Hr1G042010	chr2H:209283184-209283976	HC_G	60S ribosomal protein L11-2	GO:0003735, GO:0005622, GO:0005840, GO:0006412	PF00281, PF00673	IPR020929, IPR022803, IPR031309, IPR031310	3	X410	3.97583e-17	0.000939536	0.354994	0.141172	0.853753	0.651908	0.87879	0.0847128	6.57083e-17	0.0118615	0.999981	0.835875	0.919041	0.987073	0.999388	0.412601	0	0.101333	0	1.08405	423
	uL5_RPL11A	AT2G42740	sp|P42795|RL111_ARATH 60S ribosomal protein L11-1 OS=Arabidopsis thaliana OX=3702 GN=RPL11A PE=2 SV=2	-139.865	HORVU3Hr1G026060.1;HORVU1Hr1G028820.1;HORVU0Hr1G003140.1;HORVU2Hr1G029090.3;HORVU7Hr1G044560.1;HORVU2Hr1G042010.2;HORVU2Hr1G041980.1	7	HORVU2Hr1G041980.1 HORVU2Hr1G041980	chr2H:209237988-209238780	HC_G	60S ribosomal protein L11-2	GO:0003735, GO:0005622, GO:0005840, GO:0006412	PF00281, PF00673	IPR020929, IPR022803, IPR031309, IPR031310	3	X410	3.97583e-17	0.000939536	0.354994	0.141172	0.853753	0.651908	0.87879	0.0847128	6.57083e-17	0.0118615	0.999981	0.835875	0.919041	0.987073	0.999388	0.412601	0	0.101333	0	1.08405	423
	uL23_RPL23aB	AT3G55280	sp|Q9M3C3|R23A2_ARATH 60S ribosomal protein L23a-2 OS=Arabidopsis thaliana OX=3702 GN=RPL23AB PE=2 SV=1	-219.287	HORVU2Hr1G086390.1	1	HORVU2Hr1G086390.1 HORVU2Hr1G086390	chr2H:622887644-622888115	HC_G	60S ribosomal protein L23A	GO:0000166	PF03939	IPR005633, IPR012677	3	NA	6.13856e-19	0.00285397	0.267132	0.24476	0.580956	0.303213	0.923	0.0298183	2.07919e-18	0.0271619	0.999981	0.840832	0.746751	0.987073	0.999388	0.350134	0.0389744	1.66913	0	0.679237	362
	uL5_RPL11A	AT2G42740	sp|P42795|RL111_ARATH 60S ribosomal protein L11-1 OS=Arabidopsis thaliana OX=3702 GN=RPL11A PE=2 SV=2	-250.911	HORVU3Hr1G026060.1;HORVU1Hr1G028820.1;HORVU0Hr1G003140.1;HORVU2Hr1G029090.3;HORVU7Hr1G044560.1;HORVU2Hr1G042010.2;HORVU2Hr1G041980.1	3	HORVU0Hr1G003140.1 HORVU0Hr1G003140	chrUn:12555884-12556676	HC_G	60S ribosomal protein L11-1	GO:0003735, GO:0005622, GO:0005840, GO:0006412	PF00281, PF00673	IPR020929, IPR022803, IPR031309, IPR031310	3	X410	3.97583e-17	0.000939536	0.354994	0.141172	0.853753	0.651908	0.87879	0.0847128	6.57083e-17	0.0118615	0.999981	0.835875	0.919041	0.987073	0.999388	0.412601	0	0.101333	0	1.08405	423
	eL30_RPL30C	AT3G18740	sp|P62100|PSBI_ARATH Photosystem II reaction center protein I OS=Arabidopsis thaliana OX=3702 GN=psbI PE=1 SV=1	-271.485	HORVU1Hr1G085550.2;HORVU4Hr1G013230.1	2	HORVU4Hr1G013230.1 HORVU4Hr1G013230	chr4H:45293425-45294029	HC_G	50S ribosomal protein L21, mitochondrial	none	none	none	3	NA	3.38537e-17	0.0409866	0.324025	0.016479	0.135938	0.579982	0.178695	0.00489984	5.69348e-17	0.159828	0.999981	0.835875	0.353952	0.987073	0.999388	0.317147	0.0387692	0.126069	0	1.00644	473
	eL40_RPL40A	AT2G36170	sp|B9DHA6|RL40A_ARATH Ubiquitin-60S ribosomal protein L40-1 OS=Arabidopsis thaliana OX=3702 GN=RPL40A PE=2 SV=1	-275.897	HORVU1Hr1G023660.1;HORVU1Hr1G043930.8;HORVU7Hr1G103170.9;HORVU2Hr1G104440.1;HORVU6Hr1G026200.5;HORVU0Hr1G038500.2;HORVU6Hr1G014970.1;HORVU7Hr1G103550.4;HORVU6Hr1G014960.1;HORVU6Hr1G016150.3;HORVU1Hr1G087690.8;HORVU6Hr1G020140.6;HORVU5Hr1G019590.12;HORVU5Hr1G019600.6;HORVU7Hr1G103160.4;HORVU2Hr1G104410.26;HORVU7Hr1G102840.1;HORVU6Hr1G021700.4;HORVU7Hr1G103330.1;HORVU7Hr1G107010.1;HORVU7Hr1G109650.…	4	HORVU2Hr1G104440.1 HORVU2Hr1G104440	chr2H:703698054-703700230	HC_G	ubiquitin 4	GO:0003735, GO:0005515, GO:0005840, GO:0006412	PF00240, PF01020	IPR000626, IPR001975, IPR011332, IPR019954, IPR019956, IPR029071	5	X996	3.81449e-18	0.407176	0.26815	0.141897	0.795024	0.691516	0.746245	0.303842	8.78146e-18	0.618291	0.999981	0.835875	0.885975	0.987073	0.999388	0.619063	0	1.61423	0	0.574791	1847
	_	AT1G69410	sp|F4IPY2|SYCM_ARATH Cysteine--tRNA ligase, chloroplastic/mitochondrial OS=Arabidopsis thaliana OX=3702 GN=SYCO PE=2 SV=1	-285.031	HORVU4Hr1G078750.2	1	HORVU4Hr1G078750.2 HORVU4Hr1G078750	chr4H:608851183-608856177	HC_G	Cysteine--tRNA ligase	GO:0000166, GO:0004812, GO:0004817, GO:0005524, GO:0006418, GO:0006423	PF01406	IPR009080, IPR014729, IPR015803, IPR024909, IPR032678	5	X222	3.61527e-20	0.191255	0.776467	0.632303	0.551644	0.687375	0.643108	0.649528	3.2895e-19	0.391655	0.999981	0.957708	0.72984	0.987073	0.999388	0.834244	0	0.163032	0	1.56134	1484
	_	AT5G57870	sp|Q93ZT6|IF4G1_ARATH Eukaryotic translation initiation factor isoform 4G-1 OS=Arabidopsis thaliana OX=3702 GN=EIF(ISO)4G1 PE=1 SV=1	-287.919	HORVU2Hr1G086240.1	1	HORVU2Hr1G086240.1 HORVU2Hr1G086240	chr2H:621791875-621798089	HC_G	eukaryotic translation initiation factor 4G	GO:0003723, GO:0005488, GO:0005515	PF02847, PF02854	IPR003890, IPR003891, IPR016021, IPR016024	3	NA	3.37511e-17	0.0975102	0.703928	0.414994	0.944517	0.478658	0.849112	0.0754716	5.68392e-17	0.265096	0.999981	0.882361	0.973519	0.987073	0.999388	0.397185	0	1.43912	0	0.599356	288
	_RPL21/ NFD1	AT4G30930	sp|Q8L9A0|RM21_ARATH 50S ribosomal protein L21, mitochondrial OS=Arabidopsis thaliana OX=3702 GN=RPL21M PE=2 SV=1	-320.291	HORVU1Hr1G085550.2;HORVU4Hr1G013230.1	1	HORVU1Hr1G085550.2 HORVU1Hr1G085550	chr1H:535875517-535878401	HC_G	50S ribosomal protein L21	GO:0003723, GO:0003735, GO:0005622, GO:0005840, GO:0006412	PF00829	IPR001787, IPR028909	3	NA	3.38537e-17	0.0409866	0.324025	0.016479	0.135938	0.579982	0.178695	0.00489984	5.69348e-17	0.159828	0.999981	0.835875	0.353952	0.987073	0.999388	0.317147	0.0387692	0.126069	0	1.00644	473
	P1/P2_RPP2B	AT2G27710	sp|Q9SLF7|RLA22_ARATH 60S acidic ribosomal protein P2-2 OS=Arabidopsis thaliana OX=3702 GN=RPP2B PE=1 SV=1	-338.64	HORVU0Hr1G004480.1	1	HORVU0Hr1G004480.1 HORVU0Hr1G004480	chrUn:25719062-25719951	HC_G	60S acidic ribosomal protein family	none	PF00428	none	3	X1728	1.229e-12	0.248565	0.234922	0.216208	0.0167373	0.618924	0.763158	0.0252715	1.30743e-12	0.456684	0.999981	0.836614	0.104461	0.987073	0.999388	0.334261	0	1.32956	0	0.863311	556
	uS10_RPS20A,uS10_RPS20C	AT3G45030,AT5G62300	sp|P49200|RS201_ARATH 40S ribosomal protein S20-1 OS=Arabidopsis thaliana OX=3702 GN=RPS20A PE=2 SV=2	-353.659	HORVU7Hr1G028050.5;HORVU7Hr1G014140.4	2	HORVU7Hr1G014140.4 HORVU7Hr1G014140	chr7H:19919633-19921411	HC_G	40S ribosomal protein S20	GO:0003735, GO:0005840, GO:0006412	PF00338	IPR001848, IPR027486	3	NA	1.71478e-17	0.00333729	0.320071	0.13761	0.321025	0.807352	0.307829	0.114148	3.1274e-17	0.0302548	0.999981	0.835875	0.551376	0.987073	0.999388	0.453427	0.0775385	0.517702	0	1.3608	489
	_	AT5G57870	sp|Q9LYF6|AGP15_ARATH Arabinogalactan protein 15 OS=Arabidopsis thaliana OX=3702 GN=AGP15 PE=1 SV=1	-521.762	HORVU6Hr1G014610.3	1	HORVU6Hr1G014610.3 HORVU6Hr1G014610	chr6H:31198208-31201393	HC_G	Eukaryotic translation initiation factor 3 subunit F	GO:0005515	PF01398	IPR000555	5	NA	1.47769e-18	0.39774	0.704488	0.975864	0.248638	0.389974	0.896679	0.168102	4.12888e-18	0.610274	0.999981	0.995195	0.488235	0.987073	0.999388	0.511765	0	1.31758	0	0.79351	1359
	AtTIF3D1	AT4G20980	sp|Q9C9T3|MZT1A_ARATH Mitotic-spindle organizing protein 1A OS=Arabidopsis thaliana OX=3702 GN=GIP2 PE=1 SV=1	-525.506	HORVU7Hr1G082240.2	1	HORVU7Hr1G082240.2 HORVU7Hr1G082240	chr7H:492206186-492207303	HC_G	Translation initiation factor 1A	GO:0003723, GO:0003743, GO:0006413	PF01176	IPR001253, IPR006196, IPR012340, IPR018104	3	NA	4.05648e-15	0.25692	0.154757	0.136087	0.104795	0.385184	0.751173	0.0150782	4.93937e-15	0.464138	0.999981	0.835875	0.307333	0.987073	0.999388	0.327612	0	0.858958	0	0.380592	343
	_	AT5G57870	sp|Q9FLK2|CX5C3_ARATH Probable cytochrome c oxidase subunit 5C-3 OS=Arabidopsis thaliana OX=3702 GN=At5g61310 PE=3 SV=1	-585.947	HORVU6Hr1G083650.3	1	HORVU6Hr1G083650.3 HORVU6Hr1G083650	chr6H:552245037-552247907	HC_G	Eukaryotic translation initiation factor 3 subunit G	GO:0000166, GO:0003676	PF00076, PF12353	IPR000504, IPR012677, IPR024675	5	NA	1.28556e-14	0.259056	0.48791	0.36688	0.206414	0.290285	0.88138	0.443469	1.49922e-14	0.466789	0.999981	0.858463	0.448585	0.987073	0.999388	0.708077	0	1.16624	0	0.714046	1702
	uS11c_RPS11	ATCG00750	sp|P56802|RR11_ARATH 30S ribosomal protein S11, chloroplastic OS=Arabidopsis thaliana OX=3702 GN=rps11 PE=3 SV=1	-662.772	HORVU2Hr1G124790.1;HORVU3Hr1G109340.1	1	HORVU2Hr1G124790.1 HORVU2Hr1G124790	chr2H:759146738-759148170	HC_G	30S ribosomal protein S11	GO:0003735, GO:0005840, GO:0006412	PF00411	IPR001971	3	NA	1.27313e-15	0.106041	0.911192	0.367092	0.79166	0.54907	0.44805	0.112789	1.63519e-15	0.276844	0.999981	0.858463	0.883813	0.987073	0.999388	0.453427	0	0.149646	0	1.01774	204
	eS31_RPS27aB	AT2G47110	sp|P59232|R27AB_ARATH Ubiquitin-40S ribosomal protein S27a-2 OS=Arabidopsis thaliana OX=3702 GN=RPS27AB PE=2 SV=2	-670.6	HORVU1Hr1G023660.1;HORVU1Hr1G043930.8;HORVU7Hr1G103170.9;HORVU2Hr1G104440.1;HORVU6Hr1G026200.5;HORVU0Hr1G038500.2;HORVU6Hr1G014970.1;HORVU7Hr1G103550.4;HORVU6Hr1G014960.1;HORVU6Hr1G016150.3;HORVU1Hr1G087690.8;HORVU6Hr1G020140.6;HORVU5Hr1G019590.12;HORVU5Hr1G019600.6;HORVU7Hr1G103160.4;HORVU2Hr1G104410.26;HORVU7Hr1G102840.1;HORVU6Hr1G021700.4;HORVU7Hr1G103330.1;HORVU7Hr1G107010.1;HORVU7Hr1G109650.…	2	HORVU1Hr1G043930.8 HORVU1Hr1G043930	chr1H:320541450-320544361	HC_G	ubiquitin 6	GO:0003735, GO:0005515, GO:0005840, GO:0006412	PF00240, PF01599	IPR000626, IPR002906, IPR011332, IPR019954, IPR019956, IPR029071	5	X996	3.81449e-18	0.407176	0.26815	0.141897	0.795024	0.691516	0.746245	0.303842	8.78146e-18	0.618291	0.999981	0.835875	0.885975	0.987073	0.999388	0.619063	0	1.61423	0	0.574791	1847
	RPS9	AT3G49080	sp|Q8L6Z4|RPS9M_ARATH 30S ribosomal protein S9, mitochondrial OS=Arabidopsis thaliana OX=3702 GN=RPS9M PE=1 SV=1	-696.056	HORVU2Hr1G023120.1	1	HORVU2Hr1G023120.1 HORVU2Hr1G023120	chr2H:68478924-68481989	HC_G	30S ribosomal protein S9	GO:0003735, GO:0005840, GO:0006412	PF00380	IPR000754, IPR014721, IPR020568, IPR020574, IPR023035	5	NA	5.37817e-21	0.0685755	0.95129	0.427556	0.207982	0.663384	0.800157	0.114081	1.30039e-19	0.213104	0.999981	0.889525	0.450337	0.987073	0.999388	0.453427	0	1.13076	0	0.573496	1369
	_	_	sp|P93317|M630_ARATH Uncharacterized mitochondrial protein AtMg00630 OS=Arabidopsis thaliana OX=3702 GN=AtMg00630 PE=4 SV=1	-778.205	HORVU7Hr1G057640.1	1	HORVU7Hr1G057640.1 HORVU7Hr1G057640	chr7H:252521380-252531790	HC_G	50S ribosomal protein L23	GO:0000166, GO:0003735, GO:0005622, GO:0005840, GO:0006412	PF00276	IPR012677, IPR012678, IPR013025	3	NA	2.72414e-14	0.17599	0.323793	0.123388	0.137944	0.392062	0.358611	0.31398	3.11259e-14	0.371102	0.999981	0.835875	0.355775	0.987073	0.999388	0.625725	0	0.458721	0	0.677168	150
	P1/P2_RPP2B	AT2G27710	sp|Q9SLF7|RLA22_ARATH 60S acidic ribosomal protein P2-2 OS=Arabidopsis thaliana OX=3702 GN=RPP2B PE=1 SV=1	-809.3	HORVU6Hr1G012010.1	1	HORVU6Hr1G012010.1 HORVU6Hr1G012010	chr6H:22570255-22573536	HC_G	Eukaryotic translation initiation factor 3 subunit J-A	GO:0003743, GO:0005737, GO:0005852	PF08597	IPR013906, IPR023194	5	NA	1.43351e-16	0.881796	0.292619	0.227004	0.212481	0.524382	0.877156	0.309547	2.10701e-16	0.932404	0.999981	0.836614	0.45422	0.987073	0.999388	0.622443	0	0.922088	0	1.3656	2201
	eL22_RPL22A	AT1G02830	sp|Q9SRX7|RL221_ARATH Putative 60S ribosomal protein L22-1 OS=Arabidopsis thaliana OX=3702 GN=RPL22A PE=3 SV=1	-822.754	HORVU2Hr1G043970.1	1	HORVU2Hr1G043970.1 HORVU2Hr1G043970	chr2H:227828633-227834129	HC_G	50S ribosomal protein L28	GO:0003735	PF00830	IPR026569	3	NA	5.1265e-13	0.0854229	0.995249	0.831229	0.134856	0.588283	0.99602	0.0640326	5.51743e-13	0.243059	0.999981	0.985018	0.351872	0.987073	0.999399	0.379323	0	1.3885	0	0.811592	153
	eS7_RPS7B	AT3G02560	sp|P56760|ATPH_ARATH ATP synthase subunit c, chloroplastic OS=Arabidopsis thaliana OX=3702 GN=atpH PE=3 SV=1	-833.38	HORVU4Hr1G013640.1	1	HORVU4Hr1G013640.1 HORVU4Hr1G013640	chr4H:48284234-48288645	HC_G	50S ribosomal protein L25	GO:0003735, GO:0005840, GO:0006412, GO:0008097	PF01386, PF14693	IPR011035, IPR020056, IPR020057, IPR029751	5	NA	4.47247e-18	0.0493562	0.808921	0.766431	0.119704	0.886105	0.955996	0.589281	9.9193e-18	0.17794	0.999981	0.971928	0.324259	0.987073	0.999388	0.794935	0	0.514363	0	1.43351	1654
	RPS11/NFD3	AT1G31817	sp|Q8VZT8|RT11_ARATH Probable ribosomal protein S11, mitochondrial OS=Arabidopsis thaliana OX=3702 GN=NFD3 PE=2 SV=1	-856.325	HORVU2Hr1G124790.1;HORVU3Hr1G109340.1	2	HORVU3Hr1G109340.1 HORVU3Hr1G109340	chr3H:677561347-677563149	HC_G	30S ribosomal protein S11	GO:0003735, GO:0005840, GO:0006412	PF00411	IPR001971	3	NA	1.27313e-15	0.106041	0.911192	0.367092	0.79166	0.54907	0.44805	0.112789	1.63519e-15	0.276844	0.999981	0.858463	0.883813	0.987073	0.999388	0.453427	0	0.149646	0	1.01774	204
	cL37_PSRP-5	AT3G56910	sp|Q9LER7|PSRP5_ARATH 50S ribosomal protein 5, chloroplastic OS=Arabidopsis thaliana OX=3702 GN=PSRP5 PE=1 SV=1	-865.55	HORVU6Hr1G045130.3	1	HORVU6Hr1G045130.3 HORVU6Hr1G045130	chr6H:262176718-262180377	HC_G	eukaryotic translation initiation factor 4B1	GO:0003743	PF06273	IPR010433	3	NA	5.11734e-16	7.95845e-05	0.30006	0.316213	0.243708	0.612389	0.460549	0.468182	6.89716e-16	0.00195731	0.999981	0.848468	0.48646	0.987073	0.999388	0.723089	0	0.38489	0	0.845387	452
	_	AT1G69410	sp|F4IYF8|SYHC_ARATH Histidine--tRNA ligase, cytoplasmic OS=Arabidopsis thaliana OX=3702 GN=At3g02760 PE=2 SV=1	-880.643	HORVU1Hr1G021700.1	1	HORVU1Hr1G021700.1 HORVU1Hr1G021700	chr1H:88537485-88579805	HC_G	Histidine--tRNA ligase	GO:0003824, GO:0004812, GO:0004821, GO:0005524, GO:0006418, GO:0006427	PF00221, PF03129, PF13393	IPR001106, IPR004154, IPR006195, IPR008948, IPR015807	3	X281	3.16016e-17	0.0593847	0.537464	0.531992	0.117337	0.949257	0.627124	0.0295718	5.36924e-17	0.19538	0.999981	0.922785	0.322014	0.99798	0.999388	0.350134	0	0.907416	0	0.837335	185
	P1/P2_RPP2B	AT2G27710	sp|Q8S2W4|AGP23_ARATH Arabinogalactan protein 23 OS=Arabidopsis thaliana OX=3702 GN=AGP23 PE=1 SV=2	-909.333	HORVU3Hr1G019010.1	1	HORVU3Hr1G019010.1 HORVU3Hr1G019010	chr3H:50673213-50676428	HC_G	Translation machinery-associated protein 22	GO:0003743, GO:0006413	PF01253	IPR001950, IPR005873	5	NA	8.66135e-12	0.860965	0.774867	0.900514	0.284061	0.933738	0.548144	0.79904	9.02467e-12	0.920636	0.999981	0.99243	0.521899	0.995697	0.999388	0.909215	0	0.78272	0	1.21703	2465
	P1/P2_RPP2B	AT2G27710	sp|F4KIH4|HTT3_ARATH Protein HEAT-INDUCED TAS1 TARGET 3 OS=Arabidopsis thaliana OX=3702 GN=HTT3 PE=2 SV=1	-922.458	HORVU7Hr1G045140.1	1	HORVU7Hr1G045140.1 HORVU7Hr1G045140	chr7H:141965933-141972390	HC_G	39S ribosomal protein L46, mitochondrial	none	PF11788	IPR021757	5	NA	5.86612e-20	0.0387628	0.324145	0.10911	0.0740204	0.774928	0.166031	0.278635	4.27805e-19	0.154802	0.999981	0.835875	0.254915	0.987073	0.999388	0.602304	0	1.22561	0	1.25432	1656
	_	AT3G26618	sp|P25701|ACP2_ARATH Acyl carrier protein 2, chloroplastic OS=Arabidopsis thaliana OX=3702 GN=ACP2 PE=1 SV=2	-984.426	HORVU7Hr1G055330.1;HORVU5Hr1G112610.1	2	HORVU5Hr1G112610.1 HORVU5Hr1G112610	chr5H:639841344-639842539	HC_G	rRNA N-glycosidase	GO:0017148, GO:0030598	PF00161	IPR001574, IPR016138, IPR017988, IPR017989	5	NA	2.38849e-15	0.57933	0.547772	0.588034	0.036098	0.575467	0.579567	0.265077	2.96948e-15	0.744083	0.999981	0.943516	0.16483	0.987073	0.999388	0.584542	0	1.40679	0	0.748209	1915
	_	AT3G26618	sp|P25701|ACP2_ARATH Acyl carrier protein 2, chloroplastic OS=Arabidopsis thaliana OX=3702 GN=ACP2 PE=1 SV=2	-985.8	HORVU7Hr1G055330.1;HORVU5Hr1G112610.1	1	HORVU7Hr1G055330.1 HORVU7Hr1G055330	chr7H:226285016-226286367	HC_G	rRNA N-glycosidase	GO:0017148, GO:0030598	PF00161	IPR001574, IPR016138, IPR017988, IPR017989	5	NA	2.38849e-15	0.57933	0.547772	0.588034	0.036098	0.575467	0.579567	0.265077	2.96948e-15	0.744083	0.999981	0.943516	0.16483	0.987073	0.999388	0.584542	0	1.40679	0	0.748209	1915
	RPL14/ HLP	AT5G46160	sp|Q9FJF6|SAU23_ARATH Auxin-responsive protein SAUR23 OS=Arabidopsis thaliana OX=3702 GN=SAUR23 PE=2 SV=1	-1075.09	HORVU3Hr1G051530.1	1	HORVU3Hr1G051530.1 HORVU3Hr1G051530	chr3H:373098124-373103946	HC_G	50S ribosomal protein L25	GO:0003735, GO:0005840, GO:0006412, GO:0008097	PF01386, PF14693	IPR011035, IPR020056, IPR020057, IPR029751	5	NA	2.02214e-15	0.318541	0.304616	0.827716	0.0983824	0.517522	0.895635	0.63198	2.53303e-15	0.525483	0.999981	0.985018	0.293728	0.987073	0.999388	0.823198	0	0.140653	0	1.36769	2306
	uL1c_RPL1	AT3G63490	sp|Q9LY66|RK1_ARATH 50S ribosomal protein L1, chloroplastic OS=Arabidopsis thaliana OX=3702 GN=RPL1 PE=1 SV=1	-1117.28	HORVU7Hr1G089470.2	1	HORVU7Hr1G089470.2 HORVU7Hr1G089470	chr7H:543231186-543239666	HC_G	50S ribosomal protein L1	GO:0003723, GO:0003735, GO:0006412, GO:0015934	PF00687	IPR005878, IPR016094, IPR016095, IPR023673, IPR023674, IPR028364	3	NA	4.87435e-19	0.00325544	0.939935	0.581745	0.208659	0.895211	0.308816	0.197568	1.78057e-18	0.029621	0.999981	0.943462	0.450703	0.987073	0.999388	0.536255	0.0773333	0.154087	0	0.746917	533
	AtTIFI1	AT2G46280	sp|Q38884|EIF3I_ARATH Eukaryotic translation initiation factor 3 subunit I OS=Arabidopsis thaliana OX=3702 GN=TIF3I1 PE=2 SV=2	-1182.2	HORVU5Hr1G058430.1	1	HORVU5Hr1G058430.1 HORVU5Hr1G058430	chr5H:456872503-456878265	HC_G	Eukaryotic translation initiation factor 3 subunit I	GO:0005515	PF00400	IPR001680, IPR015943, IPR017986, IPR019775, IPR020472	5	X566	7.43214e-20	0.450938	0.38715	0.0609438	0.206302	0.599153	0.289811	0.285027	4.98425e-19	0.657353	0.999981	0.835875	0.448585	0.987073	0.999388	0.604145	0	0.380989	0	1.02177	1721
	AtTIFI1	AT2G46280	sp|Q38884|EIF3I_ARATH Eukaryotic translation initiation factor 3 subunit I OS=Arabidopsis thaliana OX=3702 GN=TIF3I1 PE=2 SV=2	-1189.9	HORVU7Hr1G084630.4	1	HORVU7Hr1G084630.4 HORVU7Hr1G084630	chr7H:509439509-509447258	HC_G	Eukaryotic translation initiation factor 3 subunit I	GO:0005515	PF00400	IPR001680, IPR015943, IPR017986, IPR019775	3	X185	6.94942e-16	0.248309	0.541226	0.167299	0.543472	0.715282	0.822284	0.0781715	9.20659e-16	0.456597	0.999981	0.835875	0.727754	0.987073	0.999388	0.402541	0	0.99193	0	0.506569	280
	_	AT3G26400	sp|Q9LIN5|IF4B1_ARATH Eukaryotic translation initiation factor 4B1 OS=Arabidopsis thaliana OX=3702 GN=EIF4B1 PE=1 SV=1	-1194.56	HORVU2Hr1G082860.3	1	HORVU2Hr1G082860.3 HORVU2Hr1G082860	chr2H:602248541-602252132	HC_G	Eukaryotic translation initiation factor 4B1	GO:0003743	PF06273	IPR010433	3	NA	5.17333e-16	0.108479	0.287354	0.127661	0.433715	0.341809	0.678703	0.118094	6.96884e-16	0.280688	0.999981	0.835875	0.642798	0.987073	0.999388	0.459068	0	1.11674	0	1.35793	503
	_	AT5G57870	sp|P59169|H33_ARATH Histone H3.3 OS=Arabidopsis thaliana OX=3702 GN=HTR4 PE=1 SV=2	-1220.73	HORVU2Hr1G006010.1	1	HORVU2Hr1G006010.1 HORVU2Hr1G006010	chr2H:12860026-12865563	HC_G	Eukaryotic translation initiation factor 3 subunit M	GO:0005515	PF01399	IPR000717, IPR011991	3	NA	2.58573e-16	0.116261	0.465296	0.342263	0.142375	0.53787	0.450177	0.0156697	3.64734e-16	0.293488	0.999981	0.856834	0.361986	0.987073	0.999388	0.327612	0	0.571661	0	1.39112	476
	AtTIF3A1	AT4G11420	sp|O49453|Y4844_ARATH Uncharacterized protein At4g28440 OS=Arabidopsis thaliana OX=3702 GN=At4g28440 PE=1 SV=1	-1668.66	HORVU5Hr1G018660.1;HORVU1Hr1G076610.1	1	HORVU5Hr1G018660.1 HORVU5Hr1G018660	chr5H:76470297-76474847	HC_G	Eukaryotic translation initiation factor 2 subunit 3	GO:0003924, GO:0005525	PF00009, PF03144, PF09173	IPR000795, IPR004161, IPR009000, IPR009001, IPR015256, IPR027417	3	NA	8.87264e-18	0.0157835	0.830857	0.847001	0.935336	0.834955	0.800924	0.191558	1.78459e-17	0.0857902	0.999981	0.985018	0.967267	0.987073	0.999388	0.531654	0	0.17997	0	1.15817	263
	P1/P2_RPP2B	AT2G27710	sp|Q9LJD7|COP10_ARATH Constitutive photomorphogenesis protein 10 OS=Arabidopsis thaliana OX=3702 GN=COP10 PE=1 SV=1	-1851.25	HORVU1Hr1G042020.1	1	HORVU1Hr1G042020.1 HORVU1Hr1G042020	chr1H:303510485-303515971	HC_G	mitochondrial 28S ribosomal protein S29-related	none	PF10236	IPR019368	3	NA	3.96364e-16	0.0394464	0.657961	0.667121	0.967676	0.354416	0.716868	0.522856	5.42461e-16	0.156763	0.999981	0.963372	0.986404	0.987073	0.999388	0.763896	0	1.46328	0	0.562611	621
	_	AT5G57870	sp|O04575|U540C_ARATH UPF0540 protein At1g62080 OS=Arabidopsis thaliana OX=3702 GN=At1g62080 PE=2 SV=1	-1851.37	HORVU6Hr1G055460.11	1	HORVU6Hr1G055460.11 HORVU6Hr1G055460	chr6H:352566227-352571785	HC_G	Eukaryotic translation initiation factor 2A	GO:0005515	PF08662	IPR011387, IPR013979, IPR015943	5	NA	1.4107e-18	0.154056	0.832762	0.786752	0.088503	0.451414	0.694081	0.139852	3.97299e-18	0.342899	0.999981	0.980589	0.279697	0.987073	0.999388	0.481152	0	0.362462	0	1.13987	1317
	_	AT4G18040	sp|O49603|CVIF2_ARATH Cell wall / vacuolar inhibitor of fructosidase 2 OS=Arabidopsis thaliana OX=3702 GN=C/VIF2 PE=1 SV=1	-1889.38	HORVU3Hr1G031330.1	1	HORVU3Hr1G031330.1 HORVU3Hr1G031330	chr3H:154631513-154635028	HC_G	Eukaryotic translation initiation factor 3 subunit L	GO:0003743, GO:0005737, GO:0005852	PF10255	IPR019382	5	NA	1.79486e-16	0.0247466	0.488214	0.96888	0.358464	0.862428	0.610786	0.126571	2.5876e-16	0.119129	0.999981	0.995195	0.582438	0.987073	0.999388	0.470339	0	0.788237	0	1.36762	1525
	uS5c_RPS5	AT2G33800	sp|P93014|RR5_ARATH 30S ribosomal protein S5, chloroplastic OS=Arabidopsis thaliana OX=3702 GN=rps5 PE=2 SV=1	-1914.2	HORVU7Hr1G115780.1	1	HORVU7Hr1G115780.1 HORVU7Hr1G115780	chr7H:642238703-642243198	HC_G	30S ribosomal protein S5	GO:0003723, GO:0003735, GO:0005840, GO:0006412	PF00333, PF03719	IPR005324, IPR013810, IPR014720, IPR014721, IPR020568	5	NA	2.9036e-18	0.0947023	0.858769	0.716176	0.259887	0.784265	0.834825	0.570937	7.0435e-18	0.260036	0.999981	0.968725	0.499273	0.987073	0.999388	0.788903	0	0.638264	0	0.856399	1698
	AtTIFI1	AT2G46280	sp|Q93W20|NIFU2_ARATH NifU-like protein 2, chloroplastic OS=Arabidopsis thaliana OX=3702 GN=NIFU2 PE=1 SV=1	-1982.53	HORVU5Hr1G018660.1;HORVU1Hr1G076610.1	2	HORVU1Hr1G076610.1 HORVU1Hr1G076610	chr1H:514922336-514929393	HC_G	Eukaryotic translation initiation factor 2 subunit 3	GO:0003924, GO:0005525	PF00009, PF03144, PF09173	IPR000795, IPR004161, IPR009000, IPR009001, IPR015256, IPR027417	3	NA	8.87264e-18	0.0157835	0.830857	0.847001	0.935336	0.834955	0.800924	0.191558	1.78459e-17	0.0857902	0.999981	0.985018	0.967267	0.987073	0.999388	0.531654	0	0.17997	0	1.15817	263
	_	AT3G60240	sp|Q76E23|IF4G_ARATH Eukaryotic translation initiation factor 4G OS=Arabidopsis thaliana OX=3702 GN=EIF4G PE=1 SV=2	-3948.12	HORVU2Hr1G041770.2;HORVU2Hr1G041760.1	2	HORVU2Hr1G041760.1 HORVU2Hr1G041760	chr2H:207964332-207971660	HC_G	Eukaryotic translation initiation factor 4G	GO:0003723, GO:0005488, GO:0005515	PF02847, PF02854	IPR003890, IPR003891, IPR016021, IPR016024	3	X130	5.13567e-18	0.214572	0.454612	0.349596	0.337117	0.331649	0.851661	0.238036	1.11512e-17	0.420475	0.999981	0.856834	0.560722	0.987073	0.999388	0.569196	0	0.500494	0	1.16004	286
	_	AT3G60240	sp|Q76E23|IF4G_ARATH Eukaryotic translation initiation factor 4G OS=Arabidopsis thaliana OX=3702 GN=EIF4G PE=1 SV=2	-4154.86	HORVU2Hr1G041770.2;HORVU2Hr1G041760.1	1	HORVU2Hr1G041770.2 HORVU2Hr1G041770	chr2H:208104298-208111594	HC_G	Eukaryotic translation initiation factor 4G	GO:0003723, GO:0005488, GO:0005515	PF02847, PF02854	IPR003890, IPR003891, IPR016021, IPR016024	3	X130	5.13567e-18	0.214572	0.454612	0.349596	0.337117	0.331649	0.851661	0.238036	1.11512e-17	0.420475	0.999981	0.856834	0.560722	0.987073	0.999388	0.569196	0	0.500494	0	1.16004	286

## Sheet: S7B
Supplementary Table 7B. Matches with a score below ten were discarded in a first filtering step. In red non-unique or unique peptides that matched to more than one or to the same protein respectively. Note that all the red highlights correspond to isoforms or paralogs within the same RP or RAP family. Green font indicates proteins that have been manually mapped based on the Arabidopsis match sinc…
Paralog	AT Code	match	match_score	Proteins identified	Peptide uniqueness	HORVU ID	Chromosme location	HC_G	General name	GO terms	PF ID	IPR ID	Cluster_Rows_Kmeans_.5k.	Cluster_Rows_AU_99.	Factor1tip	Factor2chitin	Factor2chitosan	Factor2cold	Factor1tip.Factor2chitin	Factor1tip.Factor2chitosan	Factor1tip.Factor2cold	Order in Supplemental Table S4	Mean tip-adjacent W/O cold samples	Mean tip W/O cold samples	Mean tip cold samples	Mean tip-adjacent cold samples
eS10_RPS10A	AT4G25740	sp|Q9SW09|RS101_ARATH 40S ribosomal protein S10-1 OS=Arabidopsis thaliana OX=3702 GN=RPS10A PE=2 SV=1	135.292	HORVU0Hr1G004700.1	1	HORVU0Hr1G004700.1 HORVU0Hr1G004700	chrUn:27157663-27160063	HC_G	40S ribosomal protein S10	none	PF03501	IPR005326	3	NA	0.0637715	0.540309	0.505596	0.547075	0.396679	0.645843	0.00308123	242	-0.249251	0.0465465	0.402968	-0.291372	-0.255995	0.0718563	0.440438	-0.342475	P value < 0.01
uS14_RPS29A,uS14_RPS29B,uS14_RPS29C	AT3G43980,AT3G44010,AT4G33865	sp|Q680P8|RS29_ARATH 40S ribosomal protein S29 OS=Arabidopsis thaliana OX=3702 GN=RPS29A PE=3 SV=2	191.957	HORVU5Hr1G098740.1;HORVU0Hr1G011940.3;HORVU4Hr1G037800.1	1	HORVU5Hr1G098740.1 HORVU5Hr1G098740	chr5H:608586875-608588528	HC_G	40S ribosomal protein S29	GO:0003723, GO:0003735, GO:0005622, GO:0005840, GO:0006412, GO:0015935	PF00253	IPR001209, IPR023676	3	NA	0.0897746	0.552457	0.169812	0.149197	0.462792	0.82164	0.00329664	335	-0.214504	0.0431795	0.350669	-0.333169	-0.233989	0.0669589	0.347961	-0.317907	P value < 0.05
uS14_RPS29A,uS14_RPS29B,uS14_RPS29C	AT3G43980,AT3G44010,AT4G33865	sp|Q680P8|RS29_ARATH 40S ribosomal protein S29 OS=Arabidopsis thaliana OX=3702 GN=RPS29A PE=3 SV=2	181.27	HORVU5Hr1G098740.1;HORVU0Hr1G011940.3;HORVU4Hr1G037800.1	2	HORVU0Hr1G011940.3 HORVU0Hr1G011940	chrUn:68387900-68388929	HC_G	40S ribosomal protein S29	GO:0003723, GO:0003735, GO:0005622, GO:0005840, GO:0006412, GO:0015935	PF00253	IPR001209, IPR023676	3	NA	0.0897746	0.552457	0.169812	0.149197	0.462792	0.82164	0.00329664	335	-0.214504	0.0431795	0.350669	-0.333169
EIF(ISO)4E	AT5G35620	sp|O04663|IF4E4_ARATH Eukaryotic translation initiation factor isoform 4E OS=Arabidopsis thaliana OX=3702 GN=EIF(ISO)4E PE=1 SV=2	22.8545	HORVU1Hr1G039260.2	1	HORVU1Hr1G039260.2 HORVU1Hr1G039260	chr1H:275290251-275294068	HC_G	eukaryotic translation initiation factor 4E	GO:0003723, GO:0003743, GO:0005737, GO:0006413	PF01652	IPR001040, IPR019770, IPR023398	3	NA	0.0164113	0.551639	0.116968	0.38075	0.960173	0.573082	0.00353158	365	-0.287304	0.0500845	0.415098	-0.325448
eS17_RPS17D	AT5G04800	sp|Q9LZ17|RS174_ARATH 40S ribosomal protein S17-4 OS=Arabidopsis thaliana OX=3702 GN=RPS17D PE=2 SV=3	41.5211	HORVU1Hr1G042220.1	1	HORVU1Hr1G042220.1 HORVU1Hr1G042220	chr1H:304750798-304752518	HC_G	40S ribosomal protein S17-4	GO:0003735, GO:0005622, GO:0005840, GO:0006412	PF00833	IPR001210	3	NA	0.0489904	0.137752	0.107608	0.0814967	0.235897	0.419694	0.00365199	355	-0.261359	0.0822021	0.451179	-0.376201
uL30_RPL7B	AT2G01250	sp|P60040|RL72_ARATH 60S ribosomal protein L7-2 OS=Arabidopsis thaliana OX=3702 GN=RPL7B PE=1 SV=1	275.035	HORVU2Hr1G100970.4	1	HORVU2Hr1G100970.4 HORVU2Hr1G100970	chr2H:692436366-692438591	HC_G	60S ribosomal protein L7-4	none	PF00327, PF08079	IPR005998, IPR012988, IPR016082, IPR018038	3	NA	0.00490999	0.610386	0.69593	0.202776	0.64494	0.99602	0.00387364	484	-0.341784	0.0996768	0.408023	-0.5382
AtTIF3H1	AT1G10840	sp|Q9C5Z2|EIF3H_ARATH Eukaryotic translation initiation factor 3 subunit H OS=Arabidopsis thaliana OX=3702 GN=TIF3H1 PE=1 SV=2	563.204	HORVU2Hr1G068360.8	1	HORVU2Hr1G068360.8 HORVU2Hr1G068360	chr2H:480463522-480469226	HC_G	Eukaryotic translation initiation factor 3 subunit H	GO:0003743, GO:0005515, GO:0005737, GO:0005852	PF01398	IPR000555, IPR027524	3	NA	0.0167175	0.553005	0.176014	0.300588	0.844566	0.453423	0.00517556	230	-0.23821	0.0892497	0.552351	-0.30115
eS12_RPS12A	AT1G15930	sp|Q9S9P1|RS121_ARATH 40S ribosomal protein S12-1 OS=Arabidopsis thaliana OX=3702 GN=RPS12A PE=2 SV=1	93.0409	HORVU2Hr1G053290.6	1	HORVU2Hr1G053290.6 HORVU2Hr1G053290	chr2H:325360867-325362534	HC_G	40S ribosomal protein S12	GO:0003735, GO:0005622, GO:0005840, GO:0006412	PF01248	IPR000530, IPR004038, IPR029064	3	NA	0.12021	0.0471188	0.0251228	0.116129	0.310224	0.398665	0.00659753	195	-0.334352	0.0270613	0.631049	-0.386701
eL22_RPL22B	AT3G05560	sp|Q9M9W1|RL222_ARATH 60S ribosomal protein L22-2 OS=Arabidopsis thaliana OX=3702 GN=RPL22B PE=2 SV=1	210.129	HORVU2Hr1G019160.1	1	HORVU2Hr1G019160.1 HORVU2Hr1G019160	chr2H:49900277-49901429	HC_G	60S ribosomal protein L22-2	GO:0003735, GO:0005622, GO:0005840, GO:0006412	PF01776	IPR002671	3	NA	0.0115941	0.441866	0.187788	0.390136	0.818361	0.726243	0.00813787	442	-0.275521	0.0599587	0.371045	-0.307641
uL11_RPL12C	AT5G60670	sp|Q9FF52|RL123_ARATH 60S ribosomal protein L12-3 OS=Arabidopsis thaliana OX=3702 GN=RPL12C PE=2 SV=1	414.867	HORVU6Hr1G067870.1	1	HORVU6Hr1G067870.1 HORVU6Hr1G067870	chr6H:471244933-471246184	HC_G	60S ribosomal protein L12-1	GO:0003735, GO:0005840, GO:0006412	PF00298, PF03946	IPR000911, IPR020783, IPR020784, IPR020785	3	NA	4.16251e-05	0.40877	0.164205	0.545168	0.598266	0.633315	0.00844095	440	-0.370913	0.162086	0.579142	-0.364319
Tif6-homolog	AT3G55620	sp|Q9M060|IF62_ARATH Eukaryotic translation initiation factor 6-2 OS=Arabidopsis thaliana OX=3702 GN=EIF6-2 PE=2 SV=1	715.473	HORVU2Hr1G026220.5	1	HORVU2Hr1G026220.5 HORVU2Hr1G026220	chr2H:83431674-83433254	HC_G	Eukaryotic translation initiation factor 6-2	GO:0042256, GO:0043022	PF01912	IPR002769	5	NA	0.382288	0.44222	0.411131	0.147163	0.513342	0.258562	0.00966142	1232	-0.028241	0.0871945	0.332625	-0.20986
IF5A2	AT1G26630	sp|Q93VP3|IF5A2_ARATH Eukaryotic translation initiation factor 5A-2 OS=Arabidopsis thaliana OX=3702 GN=ELF5A-2 PE=1 SV=1	364.908	HORVU2Hr1G063210.2	1	HORVU2Hr1G063210.2 HORVU2Hr1G063210	chr2H:426004357-426006246	HC_G	Eukaryotic translation initiation factor 5A-1	GO:0003723, GO:0003746, GO:0006452, GO:0043022, GO:0045901, GO:0045905	PF01287	IPR001884, IPR008991, IPR012340, IPR014722, IPR019769, IPR020189	3	NA	0.558645	0.126295	0.0155327	0.915386	0.2966	0.369791	0.0104489	587	-0.288259	-0.113068	0.472215	-0.134302
eL30_RPL30C	AT3G18740	sp|Q9LSA3|RL303_ARATH 60S ribosomal protein L30-3 OS=Arabidopsis thaliana OX=3702 GN=RPL30C PE=3 SV=1	127.425	HORVU0Hr1G023290.1;HORVU1Hr1G068640.1	1	HORVU0Hr1G023290.1 HORVU0Hr1G023290	chrUn:117229631-117231394	HC_G	60S ribosomal protein L30	none	PF01248	IPR004038, IPR022991, IPR029064	3	NA	0.000443122	0.863795	0.544083	0.581361	0.616471	0.460692	0.0122307	400	-0.290903	0.0607286	0.392811	-0.345135
eL30_RPL30C	AT3G18740	sp|Q9LSA3|RL303_ARATH 60S ribosomal protein L30-3 OS=Arabidopsis thaliana OX=3702 GN=RPL30C PE=3 SV=1	74.1731	HORVU0Hr1G023290.1;HORVU1Hr1G068640.1	2	HORVU1Hr1G068640.1 HORVU1Hr1G068640	chr1H:481938187-481940361	HC_G	60S ribosomal protein L30	none	PF01248	IPR004038, IPR022991, IPR029064	3	NA	0.000443122	0.863795	0.544083	0.581361	0.616471	0.460692	0.0122307	400	-0.290903	0.0607286	0.392811	-0.345135
IF2AH	AT2G40290	sp|Q9SIZ2|IF2AH_ARATH Eukaryotic translation initiation factor 2 subunit alpha homolog OS=Arabidopsis thaliana OX=3702 GN=At2g40290 PE=1 SV=2	641.584	HORVU2Hr1G014580.1	1	HORVU2Hr1G014580.1 HORVU2Hr1G014580	chr2H:31784211-31788103	HC_G	eukaryotic translation initiation factor 2 alpha subunit	GO:0003676, GO:0003723, GO:0003743, GO:0005850	PF00575, PF07541	IPR003029, IPR011488, IPR012340, IPR022967, IPR024054, IPR024055	3	X109	0.00780372	0.905006	0.226558	0.315045	0.922218	0.675597	0.0137242	231	-0.194094	0.113408	0.353583	-0.29034
IF5A3	AT1G69410	sp|Q9C505|IF5A3_ARATH Eukaryotic translation initiation factor 5A-3 OS=Arabidopsis thaliana OX=3702 GN=ELF5A-3 PE=2 SV=1	371.154	HORVU2Hr1G034400.4	1	HORVU2Hr1G034400.4 HORVU2Hr1G034400	chr2H:140145591-140148669	HC_G	Eukaryotic translation initiation factor 5A	GO:0003723, GO:0003746, GO:0006452, GO:0043022, GO:0045901, GO:0045905	PF01287	IPR001884, IPR008991, IPR012340, IPR014722, IPR019769, IPR020189	5	NA	0.0547991	0.305465	0.0621504	0.0190793	0.34796	0.238782	0.0143281	2114	0.0493382	-0.0586543	0.0689617	-0.15405
EF1D2	AT2G18110	sp|Q9SI20|EF1D2_ARATH Elongation factor 1-delta 2 OS=Arabidopsis thaliana OX=3702 GN=At2g18110 PE=1 SV=1	246.285	HORVU2Hr1G031450.6	1	HORVU2Hr1G031450.6 HORVU2Hr1G031450	chr2H:119871708-119873112	HC_G	Elongation factor 1-delta 1	GO:0003746, GO:0005853, GO:0006414	PF00736	IPR001326, IPR010987, IPR014038, IPR014717	3	NA	0.0992224	0.267453	0.104997	0.3775	0.329382	0.564597	0.0150979	340	-0.245494	0.0662148	0.35823	-0.253864
EF1B2	AT5G19510	sp|Q9SCX3|EF1B2_ARATH Elongation factor 1-beta 2 OS=Arabidopsis thaliana OX=3702 GN=At5g19510 PE=1 SV=1	299.565	HORVU2Hr1G022090.4	1	HORVU2Hr1G022090.4 HORVU2Hr1G022090	chr2H:63473690-63506992	HC_G	Elongation factor 1-beta	GO:0003746, GO:0005853, GO:0006414	PF00736	IPR001326, IPR010987, IPR014038, IPR014717	3	NA	0.0417464	0.0593821	0.0291185	0.283289	0.269756	0.444318	0.015178	350	-0.298313	0.0444252	0.491653	-0.280179
eS7_RPS7B	AT3G02560	sp|Q9M885|RS72_ARATH 40S ribosomal protein S7-2 OS=Arabidopsis thaliana OX=3702 GN=RPS7B PE=2 SV=1	296.597	HORVU1Hr1G029870.1	1	HORVU1Hr1G029870.1 HORVU1Hr1G029870	chr1H:167317689-167319573	HC_G	40S ribosomal protein S7	GO:0003735, GO:0005622, GO:0005840, GO:0006412	PF01251	IPR000554	3	X151	0.00833503	0.400917	0.175817	0.610934	0.449929	0.405587	0.0179725	429	-0.362905	0.147409	0.465161	-0.338165
uL13_RPL13aB	AT3G24830	sp|Q9LRX8|R13A2_ARATH 60S ribosomal protein L13a-2 OS=Arabidopsis thaliana OX=3702 GN=RPL13AB PE=2 SV=1	103.151	HORVU2Hr1G063880.1	1	HORVU2Hr1G063880.1 HORVU2Hr1G063880	chr2H:432597894-432601539	HC_G	60S ribosomal protein L13a-2	GO:0003735, GO:0005840, GO:0006412, GO:0015934	PF00572	IPR005755, IPR005822, IPR023563, IPR023564	3	X352	0.0611918	0.872629	0.843502	0.176387	0.483074	0.535739	0.0181487	478	-0.195611	0.0998431	0.253925	-0.396489
AtTIFI1	AT2G46280	sp|Q38884|EIF3I_ARATH Eukaryotic translation initiation factor 3 subunit I OS=Arabidopsis thaliana OX=3702 GN=TIF3I1 PE=2 SV=2	572.977	HORVU4Hr1G040280.4	1	HORVU4Hr1G040280.4 HORVU4Hr1G040280	chr4H:309109269-309113323	HC_G	Eukaryotic translation initiation factor 3 subunit I	GO:0003743, GO:0005515, GO:0005737, GO:0005852	PF00400	IPR001680, IPR015943, IPR017986, IPR019775, IPR020472, IPR027525	3	NA	0.0833344	0.362256	0.247904	0.335837	0.580714	0.950534	0.019644	292	-0.209531	0.0414225	0.323984	-0.256276
tRNA-K	AT1G69410	sp|Q9ZPI1|SYKC_ARATH Lysine--tRNA ligase, cytoplasmic OS=Arabidopsis thaliana OX=3702 GN=At3g11710 PE=1 SV=1	663.946	HORVU5Hr1G106380.6	1	HORVU5Hr1G106380.6 HORVU5Hr1G106380	chr5H:623949358-623954861	HC_G	Lysine--tRNA ligase	GO:0000166, GO:0003676, GO:0004812, GO:0004824, GO:0005524, GO:0005737, GO:0006418, GO:0006430	PF00152, PF01336	IPR002313, IPR004364, IPR004365, IPR006195, IPR012340, IPR018149	3	X109	0.022323	0.875311	0.455065	0.602473	0.7543	0.818709	0.0213787	237	-0.178931	0.0657498	0.336165	-0.23759
AtTIF3E1	AT3G57290	sp|Q9C5Z3|EIF3E_ARATH Eukaryotic translation initiation factor 3 subunit E OS=Arabidopsis thaliana OX=3702 GN=TIF3E1 PE=1 SV=1	303.739	HORVU5Hr1G072560.1	1	HORVU5Hr1G072560.1 HORVU5Hr1G072560	chr5H:535815189-535817106	HC_G	Eukaryotic translation initiation factor 3 subunit E	GO:0003743, GO:0005515, GO:0005737, GO:0005852	PF01399, PF09440	IPR000717, IPR011990, IPR011991, IPR016650, IPR019010	3	NA	0.0367323	0.471552	0.920139	0.994542	0.960137	0.561379	0.0246428	226	-0.204255	0.0843062	0.359613	-0.242591
AtTIF3K1	AT4G33250	sp|Q9SZA3|EIF3K_ARATH Eukaryotic translation initiation factor 3 subunit K OS=Arabidopsis thaliana OX=3702 GN=TIF3K1 PE=2 SV=1	238.028	HORVU4Hr1G077250.1	1	HORVU4Hr1G077250.1 HORVU4Hr1G077250	chr4H:603599889-603603383	HC_G	Eukaryotic translation initiation factor 3 subunit K	GO:0003743, GO:0005488, GO:0005737, GO:0005852, GO:0006446, GO:0043022	PF10075	IPR009374, IPR011991, IPR016020, IPR016024	3	NA	0.031115	0.626853	0.558358	0.287689	0.72031	0.50698	0.0247807	479	-0.198951	0.0824254	0.237072	-0.343947
uL18_RPL5A	AT3G25520	sp|Q8LBI1|RL51_ARATH 60S ribosomal protein L5-1 OS=Arabidopsis thaliana OX=3702 GN=ATL5 PE=1 SV=2	284.819	HORVU2Hr1G073320.1	1	HORVU2Hr1G073320.1 HORVU2Hr1G073320	chr2H:527519962-527522797	HC_G	60S ribosomal protein L5-1	GO:0003735, GO:0005622, GO:0005840, GO:0006412, GO:0008097	PF00861, PF14204	IPR005484, IPR005485, IPR025607	3	NA	0.0162982	0.400424	0.270331	0.177834	0.60309	0.723357	0.0276641	353	-0.249362	0.0653333	0.249642	-0.354856
AtTIF3B1	AT5G27640	sp|Q9C5Z1|EIF3B_ARATH Eukaryotic translation initiation factor 3 subunit B OS=Arabidopsis thaliana OX=3702 GN=TIF3B1 PE=1 SV=1	965.002	HORVU5Hr1G106440.1	1	HORVU5Hr1G106440.1 HORVU5Hr1G106440	chr5H:623991059-623995742	HC_G	Eukaryotic translation initiation factor 3 subunit B	GO:0000166, GO:0003676, GO:0003723, GO:0003743, GO:0005515, GO:0005852, GO:0006413, GO:0031369	PF00076, PF08662	IPR000504, IPR011042, IPR011400, IPR012677, IPR013979, IPR015943	3	NA	0.0062721	0.896836	0.586208	0.500295	0.734596	0.853999	0.0283617	245	-0.195256	0.0964321	0.315564	-0.257118
uL29_RPL35D	AT5G02610	sp|Q9LZ41|RL354_ARATH 60S ribosomal protein L35-4 OS=Arabidopsis thaliana OX=3702 GN=RPL35D PE=2 SV=1	281.958	HORVU2Hr1G068120.2	1	HORVU2Hr1G068120.2 HORVU2Hr1G068120	chr2H:478657505-478659202	HC_G	60S ribosomal protein L35-4	GO:0003735, GO:0005622, GO:0005840, GO:0006412	PF00831	IPR001854	3	NA	0.106479	0.586948	0.499441	0.562259	0.341	0.972368	0.0298836	552	-0.275747	0.0163006	0.4546	-0.315072
uL22_RPL17B	AT1G67430	sp|P51413|RL172_ARATH 60S ribosomal protein L17-2 OS=Arabidopsis thaliana OX=3702 GN=RPL17B PE=2 SV=2	419.023	HORVU7Hr1G054010.1	1	HORVU7Hr1G054010.1 HORVU7Hr1G054010	chr7H:213651429-213654111	HC_G	60S ribosomal protein L17-2	GO:0003735, GO:0005622, GO:0005840, GO:0006412, GO:0015934	PF00237	IPR001063, IPR005721, IPR018260	3	X151	0.00574072	0.482416	0.245053	0.337167	0.546945	0.881772	0.0315347	425	-0.252778	0.114662	0.327007	-0.309572
IF4E1	AT4G18040	sp|O23252|IF4E1_ARATH Eukaryotic translation initiation factor 4E-1 OS=Arabidopsis thaliana OX=3702 GN=EIF4E1 PE=1 SV=1	74.1309	HORVU3Hr1G113940.1	1	HORVU3Hr1G113940.1 HORVU3Hr1G113940	chr3H:689854512-689861683	HC_G	eukaryotic translation initiation factor 4E	GO:0003723, GO:0003743, GO:0005737, GO:0006413	PF01652	IPR001040, IPR019770, IPR023398	5	NA	0.318266	0.887969	0.515136	0.120575	0.677654	0.297993	0.0315567	1284	0.000972115	-0.0339667	0.100622	-0.199685
eS1_RPS3aB	AT4G34670	sp|Q42262|RS3A2_ARATH 40S ribosomal protein S3a-2 OS=Arabidopsis thaliana OX=3702 GN=RPS3AB PE=2 SV=3	548.534	HORVU4Hr1G070370.1	1	HORVU4Hr1G070370.1 HORVU4Hr1G070370	chr4H:575312651-575314951	HC_G	40S ribosomal protein S3a	GO:0003735, GO:0005622, GO:0005840, GO:0006412	PF01015	IPR001593, IPR018281, IPR027500	3	X151	0.000144369	0.333094	0.0716295	0.529695	0.732815	0.602177	0.0332068	428	-0.396929	0.162666	0.427677	-0.366591
eL32_RPL32A	AT4G18100	sp|P49211|RL321_ARATH 60S ribosomal protein L32-1 OS=Arabidopsis thaliana OX=3702 GN=RPL32A PE=2 SV=2	264.873	HORVU5Hr1G075420.2;HORVU5Hr1G075500.3	2	HORVU5Hr1G075500.3 HORVU5Hr1G075500	chr5H:547244561-547246475	HC_G	60S ribosomal protein L32-1	GO:0003735, GO:0005622, GO:0005840, GO:0006412	PF01655	IPR001515	3	NA	0.486132	0.399621	0.570486	0.413836	0.353446	0.928852	0.0346233	553	-0.217651	-0.0230296	0.266314	-0.286636
eL32_RPL32A	AT4G18100	sp|P49211|RL321_ARATH 60S ribosomal protein L32-1 OS=Arabidopsis thaliana OX=3702 GN=RPL32A PE=2 SV=2	262.247	HORVU5Hr1G075420.2;HORVU5Hr1G075500.3	1	HORVU5Hr1G075420.2 HORVU5Hr1G075420	chr5H:547114256-547116226	HC_G	60S ribosomal protein L32-1	GO:0003735, GO:0005622, GO:0005840, GO:0006412	PF01655	IPR001515	3	NA	0.486132	0.399621	0.570486	0.413836	0.353446	0.928852	0.0346233	553	-0.217651	-0.0230296	0.266314	-0.286636
uS4_RPS9C	AT5G39850	sp|Q9FLF0|RS92_ARATH 40S ribosomal protein S9-2 OS=Arabidopsis thaliana OX=3702 GN=RPS9C PE=1 SV=1	553.343	HORVU5Hr1G038920.1	1	HORVU5Hr1G038920.1 HORVU5Hr1G038920	chr5H:280775389-280777931	HC_G	Ribosomal protein S4	GO:0003723, GO:0003735, GO:0005622, GO:0006412, GO:0015935, GO:0019843	PF00163, PF01479	IPR001912, IPR002942, IPR005710, IPR018079	3	X91	0.00382837	0.730996	0.270117	0.04585	0.598623	0.475417	0.039611	480	-0.266369	0.175283	0.23651	-0.536441
eS19_RPS19C	AT5G61170	sp|Q9FNP8|RS193_ARATH 40S ribosomal protein S19-3 OS=Arabidopsis thaliana OX=3702 GN=RPS19C PE=2 SV=1	146.292	HORVU5Hr1G052240.6	1	HORVU5Hr1G052240.6 HORVU5Hr1G052240	chr5H:408670025-408671648	HC_G	40S ribosomal protein S19	GO:0003735, GO:0005622, GO:0005840, GO:0006412	PF01090	IPR001266, IPR011991, IPR018277	3	NA	0.000199966	0.118828	0.121256	0.390741	0.960406	0.414232	0.0408815	369	-0.282535	0.0917463	0.377556	-0.26673
uS19_RPS15D	AT5G09510	sp|Q9FY64|RS154_ARATH 40S ribosomal protein S15-4 OS=Arabidopsis thaliana OX=3702 GN=RPS15D PE=2 SV=1	63.3909	HORVU2Hr1G057430.1	1	HORVU2Hr1G057430.1 HORVU2Hr1G057430	chr2H:368188284-368191697	HC_G	30S ribosomal protein S19	GO:0003723, GO:0003735, GO:0005840, GO:0006412, GO:0015935	PF00203	IPR002222, IPR005713, IPR020934, IPR023575	3	NA	0.00156133	0.223417	0.118152	0.549662	0.871302	0.925291	0.0411278	443	-0.390736	0.077326	0.409237	-0.339537
uS13_RPS18A,uS13_RPS18B,uS13_RPS18C	AT1G22780,AT1G34030,AT4G09800	sp|P34788|RS18_ARATH 40S ribosomal protein S18 OS=Arabidopsis thaliana OX=3702 GN=RPS18A PE=1 SV=1	332.003	HORVU5Hr1G104720.1	1	HORVU5Hr1G104720.1 HORVU5Hr1G104720	chr5H:619903649-619905479	HC_G	30S ribosomal protein S13	GO:0003676, GO:0003723, GO:0003735, GO:0005622, GO:0005840, GO:0006412	PF00416	IPR001892, IPR010979, IPR018269, IPR027437	3	NA	0.00395012	0.0782097	0.0841582	0.443707	0.37582	0.57818	0.0438237	430	-0.362902	0.115324	0.369506	-0.331676
uL1_RPL10aA	AT1G08360	sp|Q8VZB9|R10A1_ARATH 60S ribosomal protein L10a-1 OS=Arabidopsis thaliana OX=3702 GN=RPL10AA PE=1 SV=1	624.68	HORVU7Hr1G059090.5;HORVU4Hr1G001350.5	1	HORVU7Hr1G059090.5 HORVU7Hr1G059090	chr7H:263804799-263806957	HC_G	60S ribosomal protein L1-B	GO:0003723, GO:0003735, GO:0006412, GO:0015934	PF00687	IPR002143, IPR016094, IPR016095, IPR023673, IPR023674, IPR028364	5	NA	0.414628	0.971377	0.742437	0.0874397	0.461905	0.556173	0.0452022	1248	0.0313492	0.00882981	0.0922172	-0.271706
uL1_RPL10aC	AT5G22440	sp|P59231|R10A3_ARATH 60S ribosomal protein L10a-3 OS=Arabidopsis thaliana OX=3702 GN=RPL10AC PE=1 SV=1	246.762	HORVU7Hr1G059090.5;HORVU4Hr1G001350.5	2	HORVU4Hr1G001350.5 HORVU4Hr1G001350	chr4H:2022938-2025577	HC_G	60S ribosomal protein L1-A	GO:0003723	PF00687	IPR016094, IPR016095, IPR023673, IPR023674, IPR028364	5	NA	0.414628	0.971377	0.742437	0.0874397	0.461905	0.556173	0.0452022	1248	0.0313492	0.00882981	0.0922172	-0.271706
eL14_RPL14A	AT2G20450	sp|Q9SIM4|RL141_ARATH 60S ribosomal protein L14-1 OS=Arabidopsis thaliana OX=3702 GN=RPL14A PE=2 SV=1	335.314	HORVU6Hr1G058560.1	1	HORVU6Hr1G058560.1 HORVU6Hr1G058560	chr6H:383270846-383276080	HC_G	60S ribosomal protein L14-1	GO:0003735, GO:0005622, GO:0005840, GO:0006412	PF01929	IPR002784, IPR008991, IPR014722	3	X91	0.000982283	0.59738	0.257115	0.107992	0.911883	0.8209	0.0468317	481	-0.315028	0.137724	0.277071	-0.503359
uL30_RPL7C	AT2G44120	sp|P60039|RL73_ARATH 60S ribosomal protein L7-3 OS=Arabidopsis thaliana OX=3702 GN=RPL7C PE=2 SV=1	465.035	HORVU5Hr1G108990.2	1	HORVU5Hr1G108990.2 HORVU5Hr1G108990	chr5H:629052727-629054625	HC_G	60S ribosomal protein L7-4	none	PF00327, PF08079	IPR005998, IPR012988, IPR016082, IPR018038	3	NA	0.000347242	0.932084	0.690637	0.40099	0.750318	0.89898	0.0470997	483	-0.364668	0.178996	0.419153	-0.512925
AtTIF3D1	AT4G20980	sp|P56820|EIF3D_ARATH Eukaryotic translation initiation factor 3 subunit D OS=Arabidopsis thaliana OX=3702 GN=TIF3D1 PE=1 SV=1	400.774	HORVU1Hr1G088760.2	1	HORVU1Hr1G088760.2 HORVU1Hr1G088760	chr1H:542658025-542660410	HC_G	Eukaryotic translation initiation factor 3 subunit D	GO:0003743, GO:0005737, GO:0005852	PF05091	IPR007783	3	NA	0.101955	0.623798	0.395777	0.257271	0.413497	0.699764	0.0499296	319	-0.144848	0.0905286	0.234172	-0.238639
uS2_RPSaA	AT1G72370	sp|Q08682|RSSA1_ARATH 40S ribosomal protein Sa-1 OS=Arabidopsis thaliana OX=3702 GN=RPSaA PE=1 SV=3	430.357	HORVU2Hr1G030880.1	1	HORVU2Hr1G030880.1 HORVU2Hr1G030880	chr2H:115448549-115451096	HC_G	40s ribosomal protein SA	GO:0003735, GO:0005622, GO:0005840, GO:0006412, GO:0015935	PF00318, PF16122	IPR001865, IPR005707, IPR018130, IPR023591, IPR027498, IPR032281	3	NA	0.000816233	0.561206	0.10209	0.772659	0.795471	0.238173	0.0504491	361	-0.514789	0.0934141	0.63581	-0.450472
uS11_RPS14C	AT3G52580	sp|P42036|RS143_ARATH 40S ribosomal protein S14-3 OS=Arabidopsis thaliana OX=3702 GN=RPS14C PE=2 SV=2	531.304	HORVU7Hr1G104220.3	1	HORVU7Hr1G104220.3 HORVU7Hr1G104220	chr7H:614230250-614232292	HC_G	30S ribosomal protein S11	GO:0003735, GO:0005840, GO:0006412	PF00411	IPR001971, IPR018102	3	NA	0.0130057	0.976755	0.316194	0.460465	0.84731	0.677056	0.0540752	398	-0.198747	0.0995743	0.281177	-0.254881
tRNA-S	AT1G69410	sp|Q39230|SYSC_ARATH Serine--tRNA ligase, cytoplasmic OS=Arabidopsis thaliana OX=3702 GN=At5g27470 PE=1 SV=1	494.384	HORVU4Hr1G070630.2	1	HORVU4Hr1G070630.2 HORVU4Hr1G070630	chr4H:577036452-577041335	HC_G	Serine--tRNA ligase	GO:0000166, GO:0004812, GO:0004828, GO:0005524, GO:0005737, GO:0006418, GO:0006434	PF00587, PF02403	IPR002314, IPR002317, IPR006195, IPR010978, IPR015866	5	NA	0.0625689	0.609214	0.373916	0.770566	0.981208	0.789696	0.0553973	1840	-0.106307	0.0729933	0.288276	-0.0979694
eL22_RPL22B	AT3G05560	sp|Q9M9W1|RL222_ARATH 60S ribosomal protein L22-2 OS=Arabidopsis thaliana OX=3702 GN=RPL22B PE=2 SV=1	275.651	HORVU7Hr1G080630.1	1	HORVU7Hr1G080630.1 HORVU7Hr1G080630	chr7H:478521607-478523139	HC_G	60S ribosomal protein L22-2	GO:0003735, GO:0005622, GO:0005840, GO:0006412	PF01776	IPR002671	3	NA	0.00906447	0.182739	0.0957897	0.548214	0.55698	0.984153	0.0556548	432	-0.299441	0.072602	0.354083	-0.26129
uL3_RPL3A	AT1G43170	sp|P17094|RL31_ARATH 60S ribosomal protein L3-1 OS=Arabidopsis thaliana OX=3702 GN=ARP1 PE=1 SV=5	993.076	HORVU5Hr1G036630.1	1	HORVU5Hr1G036630.1 HORVU5Hr1G036630	chr5H:259948875-259951686	HC_G	ribosomal protein 1	GO:0003735, GO:0005622, GO:0005840, GO:0006412	PF00297	IPR000597, IPR009000, IPR019926	3	NA	0.00436189	0.792096	0.267693	0.782852	0.861279	0.756235	0.0564365	417	-0.356032	0.0816958	0.576661	-0.346897
eL33_RPL35aC	AT1G74270	sp|Q9C912|R35A3_ARATH 60S ribosomal protein L35a-3 OS=Arabidopsis thaliana OX=3702 GN=RPL35AC PE=3 SV=1	258.983	HORVU7Hr1G031850.4	1	HORVU7Hr1G031850.4 HORVU7Hr1G031850	chr7H:65332787-65334403	HC_G	60S ribosomal protein L35a-3	GO:0003735, GO:0005622, GO:0005840, GO:0006412	PF01247	IPR001780, IPR009000, IPR018266	3	NA	0.00689853	0.244592	0.226945	0.988435	0.299267	0.568644	0.0582732	414	-0.374726	0.074469	0.519985	-0.279899
uL22_RPL17B	AT1G67430	sp|P51413|RL172_ARATH 60S ribosomal protein L17-2 OS=Arabidopsis thaliana OX=3702 GN=RPL17B PE=2 SV=2	392.263	HORVU5Hr1G052280.1	1	HORVU5Hr1G052280.1 HORVU5Hr1G052280	chr5H:409085494-409088446	HC_G	60S ribosomal protein L17-1	GO:0003735, GO:0005622, GO:0005840, GO:0006412, GO:0015934	PF00237	IPR001063, IPR005721, IPR018260	3	NA	0.00130096	0.118512	0.143122	0.86083	0.199339	0.586898	0.0612437	360	-0.47101	0.117553	0.670011	-0.372815
EF1G2	AT1G57720	sp|Q9FVT2|EF1G2_ARATH Probable elongation factor 1-gamma 2 OS=Arabidopsis thaliana OX=3702 GN=At1g57720 PE=1 SV=1	695.165	HORVU7Hr1G087050.1	1	HORVU7Hr1G087050.1 HORVU7Hr1G087050	chr7H:524389993-524393327	HC_G	Elongation factor 1-gamma 2	GO:0003746, GO:0005515, GO:0006414	PF00647, PF02798, PF14497	IPR001662, IPR004045, IPR004046, IPR010987, IPR012336	3	NA	0.0505246	0.973785	0.344669	0.710146	0.71759	0.795936	0.0621066	254	-0.2388	0.0521073	0.304308	-0.263396
AtTIF3C1	AT3G56150	sp|O49160|EIF3C_ARATH Eukaryotic translation initiation factor 3 subunit C OS=Arabidopsis thaliana OX=3702 GN=TIF3C1 PE=1 SV=2	404.824	HORVU5Hr1G063770.2	1	HORVU5Hr1G063770.2 HORVU5Hr1G063770	chr5H:494235084-494239882	HC_G	eukaryotic translation initiation factor 3 subunit C2	GO:0003723, GO:0003743, GO:0005515, GO:0005852, GO:0006413, GO:0031369	PF01399, PF05470	IPR000717, IPR008905, IPR011991, IPR027516	3	NA	0.0341249	0.79755	0.925149	0.682283	0.750827	0.959064	0.0642895	251	-0.181765	0.0831935	0.286139	-0.255505
P1/P2_RPP2A	AT2G27720	sp|P51407|RLA21_ARATH 60S acidic ribosomal protein P2-1 OS=Arabidopsis thaliana OX=3702 GN=RPP2A PE=3 SV=2	64.4305	HORVU1Hr1G073640.1	1	HORVU1Hr1G073640.1 HORVU1Hr1G073640	chr1H:504078029-504080009	HC_G	60S acidic ribosomal protein family	none	PF00428	none	3	NA	0.736821	0.28574	0.308423	0.644031	0.293886	0.844954	0.0663813	550	-0.243956	-0.0738311	0.47443	-0.181236
uL13_RPL13aD	AT5G48760	sp|Q9FKC0|R13A4_ARATH 60S ribosomal protein L13a-4 OS=Arabidopsis thaliana OX=3702 GN=RPL13AD PE=2 SV=1	537.52	HORVU5Hr1G096060.1	1	HORVU5Hr1G096060.1 HORVU5Hr1G096060	chr5H:600469098-600471664	HC_G	60S ribosomal protein L13a-4	GO:0003735, GO:0005840, GO:0006412, GO:0015934	PF00572	IPR005755, IPR005822, IPR023563, IPR023564	3	NA	0.0105214	0.686182	0.265269	0.712762	0.541678	0.285317	0.0664585	357	-0.436714	0.0551831	0.411112	-0.436328
eL38_RPL38A,eL38_RPL38B	AT2G43460,AT3G59540	sp|O22860|RL38_ARATH 60S ribosomal protein L38 OS=Arabidopsis thaliana OX=3702 GN=RPL38A PE=3 SV=1	206.944	HORVU2Hr1G043220.1	1	HORVU2Hr1G043220.1 HORVU2Hr1G043220	chr2H:219489840-219491715	HC_G	60S ribosomal protein L38	GO:0003735, GO:0005622, GO:0005840, GO:0006412	PF01781	IPR002675	3	NA	0.0802653	0.713525	0.752926	0.323791	0.91656	0.281212	0.0676303	555	-0.185997	0.0582231	0.468527	-0.442508
eL6_RPL6C	AT1G74050	sp|Q9C9C5|RL63_ARATH 60S ribosomal protein L6-3 OS=Arabidopsis thaliana OX=3702 GN=RPL6C PE=2 SV=1	50.326	HORVU6Hr1G041750.3	1	HORVU6Hr1G041750.3 HORVU6Hr1G041750	chr6H:230689978-230691486	HC_G	60S ribosomal protein L6	GO:0003735, GO:0005622, GO:0005840, GO:0006412	PF01159	IPR000915, IPR008991, IPR014722	3	X151	0.000575884	0.396721	0.0969911	0.498043	0.39533	0.341655	0.0738817	427	-0.305756	0.165883	0.408394	-0.29648
uL10_RPP0A	AT2G40010	sp|Q8VZT0|NLAL1_ARATH Putative H/ACA ribonucleoprotein complex subunit 1-like protein 1 OS=Arabidopsis thaliana OX=3702 GN=At3g03920 PE=2 SV=1	337.261	HORVU4Hr1G047580.2	1	HORVU4Hr1G047580.2 HORVU4Hr1G047580	chr4H:381659429-381661770	HC_G	H/ACA ribonucleoprotein complex subunit 1-like protein 2	GO:0001522, GO:0031429, GO:0042254	PF04410	IPR007504, IPR009000, IPR021154	3	NA	3.89448e-05	0.30439	0.343531	0.744228	0.38515	0.686313	0.0747016	461	-0.474446	0.203925	0.654532	-0.443504
IF2B	AT5G20920	sp|Q41969|IF2B_ARATH Eukaryotic translation initiation factor 2 subunit beta OS=Arabidopsis thaliana OX=3702 GN=EIF2B PE=1 SV=3	336.3	HORVU4Hr1G050630.4	1	HORVU4Hr1G050630.4 HORVU4Hr1G050630	chr4H:412884166-412889718	HC_G	eukaryotic translation initiation factor 2 beta subunit	GO:0003743, GO:0006413	PF01873	IPR002735, IPR016189, IPR016190	3	NA	0.374655	0.926959	0.151236	0.691741	0.571305	0.448552	0.0769747	270	-0.145358	0.0508124	0.271418	-0.14569
uL5_RPL11A	AT2G42740	sp|P42795|RL111_ARATH 60S ribosomal protein L11-1 OS=Arabidopsis thaliana OX=3702 GN=RPL11A PE=2 SV=2	608.171	HORVU3Hr1G026060.1;HORVU1Hr1G028820.1;HORVU0Hr1G003140.1;HORVU2Hr1G029090.3;HORVU7Hr1G044560.1;HORVU2Hr1G042010.2;HORVU2Hr1G041980.1	1	HORVU3Hr1G026060.1 HORVU3Hr1G026060	chr3H:103986514-103988924	HC_G	50S ribosomal protein L5	GO:0003735, GO:0005622, GO:0005840, GO:0006412	PF00281, PF00673	IPR002132, IPR020929, IPR022803, IPR031309, IPR031310	3	X410	0.000939536	0.354994	0.141172	0.853753	0.651908	0.87879	0.0847128	423	-0.323301	0.118876	0.368796	-0.256549
uL5_RPL11A	AT2G42740	sp|P42795|RL111_ARATH 60S ribosomal protein L11-1 OS=Arabidopsis thaliana OX=3702 GN=RPL11A PE=2 SV=2	462.11	HORVU3Hr1G026060.1;HORVU1Hr1G028820.1;HORVU0Hr1G003140.1;HORVU2Hr1G029090.3;HORVU7Hr1G044560.1;HORVU2Hr1G042010.2;HORVU2Hr1G041980.1	2	HORVU1Hr1G028820.1 HORVU1Hr1G028820	chr1H:158586780-158588899	HC_G	50S ribosomal protein L5	GO:0003735, GO:0005622, GO:0005840, GO:0006412	PF00281, PF00673	IPR002132, IPR020929, IPR022803, IPR031309, IPR031310	3	X410	0.000939536	0.354994	0.141172	0.853753	0.651908	0.87879	0.0847128	423	-0.323301	0.118876	0.368796	-0.256549
P1/P2_RPP1B	AT4G00810	sp|O23095|RLA12_ARATH 60S acidic ribosomal protein P1-2 OS=Arabidopsis thaliana OX=3702 GN=RPP1B PE=1 SV=2	39.353	HORVU7Hr1G075360.2	1	HORVU7Hr1G075360.2 HORVU7Hr1G075360	chr7H:436441515-436442702	HC_G	60S acidic ribosomal protein family	GO:0003735, GO:0005622, GO:0005840, GO:0006412	PF00428	IPR001859	3	NA	0.301775	0.205307	0.50818	0.335449	0.162751	0.711692	0.0864029	549	-0.331348	0.0734426	0.576594	-0.3841
RPS12_RPS7	AT2G07675,ATMG00980	sp|P92532|RT12_ARATH Ribosomal protein S12, mitochondrial OS=Arabidopsis thaliana OX=3702 GN=RPS12 PE=2 SV=2	370.153	HORVU3Hr1G004730.1;HORVU3Hr1G004570.1;HORVU0Hr1G037680.1;HORVU7Hr1G076970.1;HORVU6Hr1G049530.1;HORVU5Hr1G064860.1;HORVU2Hr1G121890.1;HORVU2Hr1G070510.1;HORVU2Hr1G030350.1;HORVU1Hr1G014050.1;HORVU0Hr1G034790.1;HORVU0Hr1G032570.1;HORVU0Hr1G031300.1;HORVU0Hr1G024920.1;HORVU3Hr1G044580.1	1	HORVU3Hr1G004730.1 HORVU3Hr1G004730	chr3H:11892648-11893025	HC_G	30S ribosomal protein S12	GO:0003735, GO:0005622, GO:0005840, GO:0006412, GO:0015935	PF00164	IPR005679, IPR006032, IPR012340	4	NA	0.0557151	0.74745	0.232613	0.542086	0.425106	0.50074	0.091298	1173	-0.196625	0.225477	-0.803477	-0.555083
RPS12_RPS7	AT2G07675,ATMG00980	sp|P92532|RT12_ARATH Ribosomal protein S12, mitochondrial OS=Arabidopsis thaliana OX=3702 GN=RPS12 PE=2 SV=2	370.153	HORVU3Hr1G004730.1;HORVU3Hr1G004570.1;HORVU0Hr1G037680.1;HORVU7Hr1G076970.1;HORVU6Hr1G049530.1;HORVU5Hr1G064860.1;HORVU2Hr1G121890.1;HORVU2Hr1G070510.1;HORVU2Hr1G030350.1;HORVU1Hr1G014050.1;HORVU0Hr1G034790.1;HORVU0Hr1G032570.1;HORVU0Hr1G031300.1;HORVU0Hr1G024920.1;HORVU3Hr1G044580.1	2	HORVU3Hr1G004570.1 HORVU3Hr1G004570	chr3H:11818480-11819987	HC_G	30S ribosomal protein S12	GO:0003735, GO:0005622, GO:0005840, GO:0006412, GO:0015935	PF00164	IPR005679, IPR006032, IPR012340	4	NA	0.0557151	0.74745	0.232613	0.542086	0.425106	0.50074	0.091298	1173	-0.196625	0.225477	-0.803477	-0.555083
RPS12_RPS7	AT2G07675,ATMG00980	sp|P92532|RT12_ARATH Ribosomal protein S12, mitochondrial OS=Arabidopsis thaliana OX=3702 GN=RPS12 PE=2 SV=2	370.153	HORVU3Hr1G004730.1;HORVU3Hr1G004570.1;HORVU0Hr1G037680.1;HORVU7Hr1G076970.1;HORVU6Hr1G049530.1;HORVU5Hr1G064860.1;HORVU2Hr1G121890.1;HORVU2Hr1G070510.1;HORVU2Hr1G030350.1;HORVU1Hr1G014050.1;HORVU0Hr1G034790.1;HORVU0Hr1G032570.1;HORVU0Hr1G031300.1;HORVU0Hr1G024920.1;HORVU3Hr1G044580.1	3	HORVU0Hr1G037680.1 HORVU0Hr1G037680	chrUn:236001668-236003427	HC_G	30S ribosomal protein S12	GO:0003735, GO:0005622, GO:0005840, GO:0006412, GO:0015935	PF00164	IPR005679, IPR006032, IPR012340	4	NA	0.0557151	0.74745	0.232613	0.542086	0.425106	0.50074	0.091298	1173	-0.196625	0.225477	-0.803477	-0.555083
eS26_RPS26C	AT3G56340	sp|Q9LYK9|RS263_ARATH 40S ribosomal protein S26-3 OS=Arabidopsis thaliana OX=3702 GN=RPS26C PE=2 SV=1	164.606	HORVU5Hr1G111820.1	1	HORVU5Hr1G111820.1 HORVU5Hr1G111820	chr5H:637279017-637281270	HC_G	40S ribosomal protein S26	GO:0003735, GO:0005622, GO:0005840, GO:0006412	PF01283	IPR000892	3	NA	0.0425724	0.327656	0.693089	0.813189	0.263301	0.816231	0.0945229	551	-0.279789	0.0440098	0.325497	-0.193956
tRNA-R	AT1G69410	sp|O23247|SYRM_ARATH Arginine--tRNA ligase, chloroplastic/mitochondrial OS=Arabidopsis thaliana OX=3702 GN=EMB1027 PE=1 SV=1	401.74	HORVU1Hr1G024170.2	1	HORVU1Hr1G024170.2 HORVU1Hr1G024170	chr1H:108166411-108175356	HC_G	Arginine--tRNA ligase	GO:0000166, GO:0004812, GO:0004814, GO:0005524, GO:0005737, GO:0006418, GO:0006420	PF00750, PF03485, PF05746	IPR001278, IPR001412, IPR005148, IPR008909, IPR009080, IPR014729	5	NA	0.582007	0.736509	0.332169	0.0610086	0.684824	0.290462	0.0957267	2327	-0.03718	-0.0114305	-0.0226467	-0.293835
eS7_RPS7B	AT3G02560	sp|Q9M885|RS72_ARATH 40S ribosomal protein S7-2 OS=Arabidopsis thaliana OX=3702 GN=RPS7B PE=2 SV=1	185.345	HORVU4Hr1G055230.1	1	HORVU4Hr1G055230.1 HORVU4Hr1G055230	chr4H:463380561-463382856	HC_G	40S ribosomal protein S7	GO:0003735, GO:0005622, GO:0005840, GO:0006412	PF01251	IPR000554	5	NA	0.430578	0.445082	0.230834	0.194054	0.447094	0.504406	0.095886	1561	-0.125414	0.0661416	0.183555	-0.238097
IF5A1	AT1G13950	sp|Q9XI91|IF5A1_ARATH Eukaryotic translation initiation factor 5A-1 OS=Arabidopsis thaliana OX=3702 GN=ELF5A-1 PE=1 SV=1	372.147	HORVU5Hr1G028360.3	1	HORVU5Hr1G028360.3 HORVU5Hr1G028360	chr5H:167332007-167339562	HC_G	Eukaryotic translation initiation factor 5A-3	GO:0003723, GO:0003746, GO:0006452, GO:0043022, GO:0045901, GO:0045905	PF01287	IPR001884, IPR008991, IPR012340, IPR014722, IPR019769, IPR020189	5	NA	0.402914	0.415156	0.184258	0.391038	0.367558	0.303806	0.0964006	1596	-0.134515	0.0520103	0.174668	-0.156383
uL6_RPL9B,uL6_RPL9C	AT1G33120,AT1G33140	sp|P49209|RL91_ARATH 60S ribosomal protein L9-1 OS=Arabidopsis thaliana OX=3702 GN=RPL9B PE=1 SV=3	401.713	HORVU7Hr1G002060.1;HORVU0Hr1G006020.2;HORVU3Hr1G001140.5	1	HORVU7Hr1G002060.1 HORVU7Hr1G002060	chr7H:4055831-4057852	HC_G	Ribosomal protein L6 family	GO:0003735, GO:0005622, GO:0005840, GO:0006412, GO:0019843	PF00347	IPR000702, IPR002359, IPR020040	3	X410	3.52313e-05	0.961604	0.324466	0.330735	0.680967	0.647206	0.0979977	421	-0.323364	0.210649	0.310457	-0.422643
uL6_RPL9B,uL6_RPL9C	AT1G33120,AT1G33140	sp|P49209|RL91_ARATH 60S ribosomal protein L9-1 OS=Arabidopsis thaliana OX=3702 GN=RPL9B PE=1 SV=3	271.713	HORVU7Hr1G002060.1;HORVU0Hr1G006020.2;HORVU3Hr1G001140.5	2	HORVU0Hr1G006020.2 HORVU0Hr1G006020	chrUn:32720893-32722691	HC_G	Ribosomal protein L6 family	GO:0003735, GO:0005622, GO:0005840, GO:0006412, GO:0019843	PF00347	IPR000702, IPR002359, IPR020040	3	X410	3.52313e-05	0.961604	0.324466	0.330735	0.680967	0.647206	0.0979977	421	-0.323364	0.210649	0.310457	-0.422643
uL6_RPL9B,uL6_RPL9C	AT1G33120,AT1G33140	sp|P49209|RL91_ARATH 60S ribosomal protein L9-1 OS=Arabidopsis thaliana OX=3702 GN=RPL9B PE=1 SV=3	211.713	HORVU7Hr1G002060.1;HORVU0Hr1G006020.2;HORVU3Hr1G001140.5	3	HORVU3Hr1G001140.5 HORVU3Hr1G001140	chr3H:2524445-2526706	HC_G	Ribosomal protein L6 family	GO:0003735, GO:0005622, GO:0005840, GO:0006412, GO:0019843	PF00347	IPR002359, IPR020040	3	X410	3.52313e-05	0.961604	0.324466	0.330735	0.680967	0.647206	0.0979977	421	-0.323364	0.210649	0.310457	-0.422643
uS2_RPSaA	AT1G72370	sp|Q08682|RSSA1_ARATH 40S ribosomal protein Sa-1 OS=Arabidopsis thaliana OX=3702 GN=RPSaA PE=1 SV=3	10.7369	HORVU4Hr1G077240.1	1	HORVU4Hr1G077240.1 HORVU4Hr1G077240	chr4H:603597180-603599447	HC_G	40s ribosomal protein SA	GO:0003735, GO:0005622, GO:0005840, GO:0006412, GO:0015935	PF00318	IPR001865, IPR005707, IPR018130, IPR023591, IPR027498	3	NA	5.1066e-05	0.724785	0.376617	0.724655	0.899409	0.730805	0.098345	356	-0.346272	0.156755	0.485692	-0.359087
tRNA-Q	AT1G69410	sp|Q8W4F3|SYQ_ARATH Glutamine--tRNA ligase, cytoplasmic OS=Arabidopsis thaliana OX=3702 GN=OVA9 PE=2 SV=1	243.278	HORVU3Hr1G020250.8	1	HORVU3Hr1G020250.8 HORVU3Hr1G020250	chr3H:62416500-62422027	HC_G	Glutamine--tRNA ligase	GO:0000166, GO:0004812, GO:0004819, GO:0005524, GO:0005737, GO:0006412, GO:0006418, GO:0006425, GO:0016876, GO:0043039	PF00749, PF03950, PF04557, PF04558	IPR000924, IPR001412, IPR004514, IPR007638, IPR007639, IPR011035, IPR014729, IPR020056, IPR020058, IPR020059, IPR020061	5	NA	0.365965	0.868861	0.951973	0.472523	0.562451	0.918932	0.102476	1496	-0.0687604	0.0381459	0.153	-0.167304
tRNA-Y	AT1G69410	sp|Q8S9J2|SYYC1_ARATH Tyrosine--tRNA ligase 1, cytoplasmic OS=Arabidopsis thaliana OX=3702 GN=At2g33840 PE=2 SV=1	166.775	HORVU0Hr1G021230.1	1	HORVU0Hr1G021230.1 HORVU0Hr1G021230	chrUn:111397138-111402308	HC_G	Tyrosine--tRNA ligase	GO:0000166, GO:0004812, GO:0005524, GO:0006418	PF00579	IPR002305, IPR014729	3	NA	0.0368202	0.804452	0.410502	0.494678	0.763282	0.915289	0.104874	334	-0.172165	0.0599454	0.337149	-0.231351
eS27_RPS27B	AT3G61110	sp|Q9M2F1|RS272_ARATH 40S ribosomal protein S27-2 OS=Arabidopsis thaliana OX=3702 GN=RPS27B PE=2 SV=2	303.818	HORVU4Hr1G014130.1;HORVU4Hr1G074270.1;HORVU7Hr1G112740.4	1	HORVU4Hr1G014130.1 HORVU4Hr1G014130	chr4H:51276810-51278617	HC_G	40S ribosomal protein S27	GO:0003735, GO:0005622, GO:0005840, GO:0006412	PF01667	IPR000592, IPR011332, IPR023407	3	NA	0.00964037	0.321966	0.106356	0.895184	0.446974	0.743547	0.105195	408	-0.328403	0.12435	0.404711	-0.207993
eS27_RPS27B	AT3G61110	sp|Q9M2F1|RS272_ARATH 40S ribosomal protein S27-2 OS=Arabidopsis thaliana OX=3702 GN=RPS27B PE=2 SV=2	303.818	HORVU4Hr1G014130.1;HORVU4Hr1G074270.1;HORVU7Hr1G112740.4	2	HORVU4Hr1G074270.1 HORVU4Hr1G074270	chr4H:593630884-593632513	HC_G	40S ribosomal protein S27	GO:0003735, GO:0005622, GO:0005840, GO:0006412	PF01667	IPR000592, IPR011332, IPR023407	3	NA	0.00964037	0.321966	0.106356	0.895184	0.446974	0.743547	0.105195	408	-0.328403	0.12435	0.404711	-0.207993
eS27_RPS27B	AT3G61110	sp|Q9M2F1|RS272_ARATH 40S ribosomal protein S27-2 OS=Arabidopsis thaliana OX=3702 GN=RPS27B PE=2 SV=2	293.131	HORVU4Hr1G014130.1;HORVU4Hr1G074270.1;HORVU7Hr1G112740.4	3	HORVU7Hr1G112740.4 HORVU7Hr1G112740	chr7H:635735961-635738357	HC_G	40S ribosomal protein S27	GO:0003735, GO:0005622, GO:0005840, GO:0006412	PF01667	IPR000592, IPR011332, IPR023407	3	NA	0.00964037	0.321966	0.106356	0.895184	0.446974	0.743547	0.105195	408	-0.328403	0.12435	0.404711	-0.207993
eS8_RPS8B	AT5G59240	sp|Q9FIF3|RS82_ARATH 40S ribosomal protein S8-2 OS=Arabidopsis thaliana OX=3702 GN=RPS8B PE=2 SV=1	512.156	HORVU2Hr1G067370.5	1	HORVU2Hr1G067370.5 HORVU2Hr1G067370	chr2H:472632586-472634600	HC_G	40S ribosomal protein S8	GO:0003735, GO:0005622, GO:0005840, GO:0006412	PF01201	IPR001047, IPR018283, IPR022309	3	NA	0.0465594	0.592319	0.195174	0.949876	0.462447	0.439466	0.105264	406	-0.286679	0.0750268	0.312722	-0.191418
tRNA-K	AT1G69410	sp|F4I116|SYLC_ARATH Leucine--tRNA ligase, cytoplasmic OS=Arabidopsis thaliana OX=3702 GN=At1g09620 PE=1 SV=1	1281.82	HORVU3Hr1G032730.1	1	HORVU3Hr1G032730.1 HORVU3Hr1G032730	chr3H:169948045-169953829	HC_G	Leucine--tRNA ligase	GO:0000166, GO:0002161, GO:0004812, GO:0004823, GO:0005524, GO:0005737, GO:0006418, GO:0006429	PF00133, PF08264	IPR001412, IPR002300, IPR004493, IPR009008, IPR009080, IPR013155, IPR014729	5	X281	0.0690093	0.789988	0.740451	0.434452	0.401846	0.821982	0.106222	1399	-0.163225	0.0901129	0.191619	-0.27669
uS3_RPS3C	AT5G35530	sp|Q9FJA6|RS33_ARATH 40S ribosomal protein S3-3 OS=Arabidopsis thaliana OX=3702 GN=RPS3C PE=1 SV=1	598.035	HORVU7Hr1G067280.1;HORVU5Hr1G034770.1	1	HORVU7Hr1G067280.1 HORVU7Hr1G067280	chr7H:350974016-350976357	HC_G	Ribosomal protein S3 family protein	GO:0003723, GO:0003735, GO:0005840, GO:0006412, GO:0015935	PF00189, PF07650	IPR001351, IPR004044, IPR005703, IPR009019, IPR015946, IPR018280	3	X410	4.55792e-05	0.879413	0.490676	0.553634	0.851321	0.910848	0.107507	422	-0.328539	0.171881	0.340347	-0.381742
uS3_RPS3C	AT5G35530	sp|Q9FJA6|RS33_ARATH 40S ribosomal protein S3-3 OS=Arabidopsis thaliana OX=3702 GN=RPS3C PE=1 SV=1	478.035	HORVU7Hr1G067280.1;HORVU5Hr1G034770.1	2	HORVU5Hr1G034770.1 HORVU5Hr1G034770	chr5H:236531725-236534211	HC_G	Ribosomal protein S3 family protein	GO:0003723, GO:0003735, GO:0005840, GO:0006412, GO:0015935	PF00189, PF07650	IPR001351, IPR004044, IPR005703, IPR009019, IPR015946, IPR018280	3	X410	4.55792e-05	0.879413	0.490676	0.553634	0.851321	0.910848	0.107507	422	-0.328539	0.171881	0.340347	-0.381742
eL32_RPL32A	AT4G18100	sp|P49211|RL321_ARATH 60S ribosomal protein L32-1 OS=Arabidopsis thaliana OX=3702 GN=RPL32A PE=2 SV=2	362.934	HORVU7Hr1G052960.1	1	HORVU7Hr1G052960.1 HORVU7Hr1G052960	chr7H:204783549-204786127	HC_G	60S ribosomal protein L32-1	GO:0003735, GO:0005622, GO:0005840, GO:0006412	PF01655	IPR001515	3	NA	0.10458	0.82116	0.685435	0.484189	0.769031	0.934759	0.108282	608	-0.231265	0.0248594	0.293344	-0.405669
ERF1Z	AT3G26618	sp|P35614|ERF1Z_ARATH Eukaryotic peptide chain release factor subunit 1-3 OS=Arabidopsis thaliana OX=3702 GN=ERF1-3 PE=1 SV=1	1356.35	HORVU4Hr1G006500.2	1	HORVU4Hr1G006500.2 HORVU4Hr1G006500	chr4H:15277573-15279046	HC_G	Eukaryotic peptide chain release factor subunit 1-3	GO:0005737, GO:0006415, GO:0016149	PF03463, PF03464, PF03465	IPR004403, IPR005140, IPR005141, IPR005142, IPR024049, IPR029064	3	NA	0.11142	0.792541	0.329511	0.550868	0.624153	0.743925	0.110948	271	-0.170252	0.0687295	0.22233	-0.228611
uL18_RPL5A	AT3G25520	sp|Q8LBI1|RL51_ARATH 60S ribosomal protein L5-1 OS=Arabidopsis thaliana OX=3702 GN=ATL5 PE=1 SV=2	547.506	HORVU5Hr1G092630.1	1	HORVU5Hr1G092630.1 HORVU5Hr1G092630	chr5H:588904933-588907794	HC_G	60S ribosomal protein L5-1	GO:0003735, GO:0005622, GO:0005840, GO:0006412, GO:0008097	PF00861, PF14204	IPR005484, IPR005485, IPR025607	3	X151	0.00226164	0.339378	0.0656045	0.436403	0.791858	0.739976	0.111365	426	-0.275645	0.144414	0.341961	-0.270745
EFTU	AT4G20360	sp|P17745|EFTU_ARATH Elongation factor Tu, chloroplastic OS=Arabidopsis thaliana OX=3702 GN=TUFA PE=1 SV=1	532.797	HORVU6Hr1G053680.5	1	HORVU6Hr1G053680.5 HORVU6Hr1G053680	chr6H:336377832-336379785	HC_G	Elongation factor Tu	GO:0003746, GO:0003924, GO:0005525, GO:0005622, GO:0006414	PF00009, PF03143, PF03144	IPR000795, IPR004160, IPR004161, IPR004541, IPR009000, IPR009001, IPR027417, IPR031157	5	X1444	0.678785	0.995188	0.485599	0.276189	0.509194	0.84981	0.112298	2274	-0.0860992	-0.103192	0.041569	-0.240959
uS10_RPS20A,uS10_RPS20C	AT3G45030,AT5G62300	sp|P49200|RS201_ARATH 40S ribosomal protein S20-1 OS=Arabidopsis thaliana OX=3702 GN=RPS20A PE=2 SV=2	269.589	HORVU7Hr1G028050.5;HORVU7Hr1G014140.4	1	HORVU7Hr1G028050.5 HORVU7Hr1G028050	chr7H:50144424-50146899	HC_G	30S ribosomal protein S10	GO:0003735, GO:0005840, GO:0006412, GO:0015935	PF00338	IPR001848, IPR005729, IPR027486	3	NA	0.00333729	0.320071	0.13761	0.321025	0.807352	0.307829	0.114148	489	-0.291436	0.123876	0.24763	-0.335493
eL21_RPL21E,eL21_RPL21G	AT1G57660,AT1G57860	sp|Q9FDZ9|RL212_ARATH 60S ribosomal protein L21-2 OS=Arabidopsis thaliana OX=3702 GN=RPL21E PE=2 SV=1	333.175	HORVU4Hr1G084420.2	1	HORVU4Hr1G084420.2 HORVU4Hr1G084420	chr4H:628801849-628803652	HC_G	60S ribosomal protein L21-2	GO:0003735, GO:0005622, GO:0005840, GO:0006412	PF01157	IPR001147, IPR008991, IPR018259	3	NA	0.0087393	0.617594	0.353035	0.870916	0.664765	0.939137	0.12238	407	-0.298201	0.0838036	0.323862	-0.252808
uS9_RPS16A	AT2G09990	sp|Q9SK22|RS161_ARATH 40S ribosomal protein S16-1 OS=Arabidopsis thaliana OX=3702 GN=RPS16A PE=2 SV=1	90.9894	HORVU5Hr1G045620.1	1	HORVU5Hr1G045620.1 HORVU5Hr1G045620	chr5H:352755344-352757223	HC_G	30S ribosomal protein S9	GO:0003735, GO:0005840, GO:0006412	PF00380	IPR000754, IPR014721, IPR020568, IPR020574	3	NA	0.00014164	0.305901	0.434581	0.324208	0.683471	0.778408	0.124017	488	-0.361205	0.122615	0.276581	-0.440193
MRF4	AT5G57870	sp|Q9STL9|MRF4_ARATH MA3 DOMAIN-CONTAINING TRANSLATION REGULATORY FACTOR 4 OS=Arabidopsis thaliana OX=3702 GN=MRF4 PE=1 SV=1	367.779	HORVU7Hr1G074850.3	1	HORVU7Hr1G074850.3 HORVU7Hr1G074850	chr7H:430314594-430319895	HC_G	eukaryotic translation initiation factor 4G	GO:0005488	PF02847	IPR003891, IPR016021, IPR016024	5	NA	0.460039	0.84381	0.468671	0.25299	0.379172	0.454537	0.125954	1436	-0.0771503	0.0714708	0.118425	-0.189307
tRNA-N	AT1G69410	sp|Q9SW96|SYNC1_ARATH Asparagine--tRNA ligase, cytoplasmic 1 OS=Arabidopsis thaliana OX=3702 GN=SYNC1 PE=1 SV=1	574.321	HORVU1Hr1G021130.2	1	HORVU1Hr1G021130.2 HORVU1Hr1G021130	chr1H:84343764-84347935	HC_G	Asparagine--tRNA ligase	GO:0000166, GO:0003676, GO:0004812, GO:0004816, GO:0005524, GO:0005737, GO:0006418, GO:0006421	PF00152, PF00458, PF01336	IPR000738, IPR002312, IPR004364, IPR004365, IPR004522, IPR006195, IPR009068, IPR012340	5	NA	0.156261	0.832292	0.612328	0.545896	0.524365	0.948255	0.127825	1387	-0.116559	0.0679019	0.213441	-0.178474
uS8_RPS15aA,uS8_RPS15aF	AT1G07770,AT5G59850	sp|P42798|R15A1_ARATH 40S ribosomal protein S15a-1 OS=Arabidopsis thaliana OX=3702 GN=RPS15AA PE=2 SV=2	552.665	HORVU1Hr1G072060.1;HORVU3Hr1G086930.1	1	HORVU1Hr1G072060.1 HORVU1Hr1G072060	chr1H:495884739-495886729	HC_G	30S ribosomal protein S8	GO:0003735, GO:0005840, GO:0006412	PF00410	IPR000630	3	NA	0.00171376	0.896685	0.80051	0.441482	0.474143	0.835788	0.1335	210	-0.246477	0.110904	0.218923	-0.334088
uS8_RPS15aA,uS8_RPS15aF	AT1G07770,AT5G59850	sp|P42798|R15A1_ARATH 40S ribosomal protein S15a-1 OS=Arabidopsis thaliana OX=3702 GN=RPS15AA PE=2 SV=2	327.978	HORVU1Hr1G072060.1;HORVU3Hr1G086930.1	2	HORVU3Hr1G086930.1 HORVU3Hr1G086930	chr3H:619313438-619316091	HC_G	30S ribosomal protein S8	GO:0003735, GO:0005840, GO:0006412	PF00410	IPR000630	3	NA	0.00171376	0.896685	0.80051	0.441482	0.474143	0.835788	0.1335	210	-0.246477	0.110904	0.218923	-0.334088
eL31_RPL31A	AT2G19740	sp|Q9SLL7|RL311_ARATH 60S ribosomal protein L31-1 OS=Arabidopsis thaliana OX=3702 GN=RPL31A PE=3 SV=1	214.636	HORVU7Hr1G050170.1	1	HORVU7Hr1G050170.1 HORVU7Hr1G050170	chr7H:179773136-179774855	HC_G	60S ribosomal protein L31	GO:0003735, GO:0005622, GO:0005840, GO:0006412	PF01198	IPR000054, IPR023621	3	NA	0.00495393	0.43105	0.288459	0.715254	0.483993	0.795366	0.133582	354	-0.371989	0.15318	0.552655	-0.333386
uS5_RPS2D	AT3G57490	sp|Q9SCM3|RS24_ARATH 40S ribosomal protein S2-4 OS=Arabidopsis thaliana OX=3702 GN=RPS2D PE=2 SV=1	237.729	HORVU5Hr1G109910.2	1	HORVU5Hr1G109910.2 HORVU5Hr1G109910	chr5H:631251099-631252934	HC_G	30S ribosomal protein S5	GO:0003723, GO:0003735, GO:0005840, GO:0006412, GO:0015935	PF00333, PF03719	IPR005324, IPR005711, IPR013810, IPR014720, IPR014721, IPR018192, IPR020568	3	X59	0.00264351	0.702272	0.342181	0.987604	0.488621	0.668325	0.136814	435	-0.333243	0.119532	0.314767	-0.283685
uL4_RPL4D	AT5G02870	sp|P49691|RL4B_ARATH 60S ribosomal protein L4-2 OS=Arabidopsis thaliana OX=3702 GN=RPL4D PE=1 SV=2	634.971	HORVU5Hr1G105870.1	1	HORVU5Hr1G105870.1 HORVU5Hr1G105870	chr5H:622808285-622810943	HC_G	60S ribosomal protein L4-1	GO:0003735, GO:0005840, GO:0006412	PF00573, PF14374	IPR002136, IPR013000, IPR023574, IPR025755	3	NA	0.239296	0.231686	0.205024	0.997357	0.399749	0.882267	0.145273	590	-0.248872	-0.044313	0.305178	-0.147188
eL20_RPL18aB	AT2G34480	sp|P51418|R18A2_ARATH 60S ribosomal protein L18a-2 OS=Arabidopsis thaliana OX=3702 GN=RPL18AB PE=1 SV=2	562.865	HORVU1Hr1G088040.2	1	HORVU1Hr1G088040.2 HORVU1Hr1G088040	chr1H:540809511-540812264	HC_G	60S ribosomal protein L18A-1	GO:0003735, GO:0005840, GO:0006412	PF01775	IPR021138, IPR023573, IPR028877	3	NA	0.000137037	0.274225	0.12234	0.986324	0.772754	0.413214	0.145311	441	-0.386524	0.0923486	0.42372	-0.312617
uL10_RPP0A	AT2G40010	sp|O04204|RLA01_ARATH 60S acidic ribosomal protein P0-1 OS=Arabidopsis thaliana OX=3702 GN=RPP0A PE=1 SV=1	556.811	HORVU7Hr1G073720.5	1	HORVU7Hr1G073720.5 HORVU7Hr1G073720	chr7H:419565969-419568853	HC_G	60S acidic ribosomal protein P0	GO:0005622, GO:0042254	PF00428, PF00466	IPR001790, IPR030670	3	X59	0.00470924	0.473204	0.197022	0.94751	0.503272	0.837165	0.155949	433	-0.309932	0.132653	0.35782	-0.230826
eS25_RPS25B	AT2G21580	sp|Q9SIK2|RS252_ARATH 40S ribosomal protein S25-2 OS=Arabidopsis thaliana OX=3702 GN=RPS25B PE=3 SV=1	262.592	HORVU4Hr1G001220.3	1	HORVU4Hr1G001220.3 HORVU4Hr1G001220	chr4H:1808204-1809386	HC_G	40S ribosomal protein S25-4	none	PF03297	IPR004977, IPR011991	3	NA	0.000190078	0.233085	0.133581	0.93253	0.692984	0.652198	0.157961	370	-0.3735	0.132118	0.408581	-0.268851
eS28_RPS28A,eS28_RPS28B	AT3G10090,AT5G03850	sp|Q9SR73|RS281_ARATH 40S ribosomal protein S28-1 OS=Arabidopsis thaliana OX=3702 GN=RPS28A PE=3 SV=1	147.425	HORVU3Hr1G115820.3	1	HORVU3Hr1G115820.3 HORVU3Hr1G115820	chr3H:694227797-694264864	HC_G	40S ribosomal protein S28	GO:0003735, GO:0005622, GO:0005840, GO:0006412	PF01200	IPR000289, IPR012340, IPR028626	3	NA	0.000131223	0.51635	0.145198	0.741109	0.809419	0.624321	0.161767	358	-0.433467	0.198225	0.588941	-0.384334
uL24_RPL26A	AT3G49910	sp|P51414|RL261_ARATH 60S ribosomal protein L26-1 OS=Arabidopsis thaliana OX=3702 GN=RPL26A PE=2 SV=2	246.978	HORVU3Hr1G026880.1	1	HORVU3Hr1G026880.1 HORVU3Hr1G026880	chr3H:111873622-111875153	HC_G	60S ribosomal protein L26-1	GO:0003735, GO:0005622, GO:0005840, GO:0006412, GO:0015934	PF00467, PF16906	IPR005756, IPR005824, IPR005825, IPR008991, IPR014722	3	NA	0.00987399	0.38574	0.281357	0.927691	0.417204	0.992764	0.163546	364	-0.282766	0.0542059	0.345404	-0.230307
eL18_RPL18B	AT3G05590	sp|P42791|RL182_ARATH 60S ribosomal protein L18-2 OS=Arabidopsis thaliana OX=3702 GN=RPL18B PE=1 SV=2	313.138	HORVU1Hr1G022570.1	1	HORVU1Hr1G022570.1 HORVU1Hr1G022570	chr1H:96478835-96482565	HC_G	60S ribosomal protein L18-2	GO:0003735, GO:0005622, GO:0005840, GO:0006412	none	IPR021131, IPR021132	3	NA	0.0059394	0.391781	0.752245	0.612412	0.470115	0.682572	0.166013	154	-0.274329	0.0964765	0.300987	-0.378256
uS15_RPS13B	AT4G00100	sp|P59224|RS132_ARATH 40S ribosomal protein S13-2 OS=Arabidopsis thaliana OX=3702 GN=RPS13B PE=2 SV=1	322.249	HORVU7Hr1G075250.1	1	HORVU7Hr1G075250.1 HORVU7Hr1G075250	chr7H:435469556-435471602	HC_G	40S ribosomal protein S13-1	GO:0003735, GO:0005622, GO:0005840, GO:0006412	PF00312, PF08069	IPR000589, IPR009068, IPR012606, IPR023029	3	NA	0.00100175	0.48337	0.330265	0.491393	0.600457	0.880502	0.166561	359	-0.419041	0.0835771	0.626154	-0.265969
eS10_RPS10A	AT4G25740	sp|Q9SW09|RS101_ARATH 40S ribosomal protein S10-1 OS=Arabidopsis thaliana OX=3702 GN=RPS10A PE=2 SV=1	135.035	HORVU3Hr1G111760.2	1	HORVU3Hr1G111760.2 HORVU3Hr1G111760	chr3H:684491487-684493790	HC_G	40S ribosomal protein S10	none	PF03501	IPR005326	3	NA	0.000576982	0.625958	0.7635	0.671982	0.737769	0.837862	0.170128	482	-0.315926	0.182692	0.349799	-0.362966
uL4_RPL4A	AT3G09630	sp|Q9SF40|RL4A_ARATH 60S ribosomal protein L4-1 OS=Arabidopsis thaliana OX=3702 GN=RPL4A PE=1 SV=1	563.217	HORVU4Hr1G075710.1	1	HORVU4Hr1G075710.1 HORVU4Hr1G075710	chr4H:599032193-599035023	HC_G	60S ribosomal protein L4-1	GO:0003735, GO:0005840, GO:0006412	PF00573, PF14374	IPR002136, IPR013000, IPR023574, IPR025755	3	NA	0.00201339	0.384805	0.146996	0.970834	0.522012	0.950318	0.178978	409	-0.32651	0.158112	0.407393	-0.205719
tRNA-G	AT1G69410	sp|O23627|SYGM1_ARATH Glycine--tRNA ligase, mitochondrial 1 OS=Arabidopsis thaliana OX=3702 GN=At1g29880 PE=1 SV=1	1051.15	HORVU7Hr1G055340.1	1	HORVU7Hr1G055340.1 HORVU7Hr1G055340	chr7H:226514183-226519506	HC_G	Glycine--tRNA ligase	GO:0000166, GO:0004812, GO:0004820, GO:0005524, GO:0005737, GO:0006418, GO:0006426	PF00587, PF03129	IPR000738, IPR002314, IPR002315, IPR004154, IPR006195, IPR009068	5	X281	0.0299993	0.794494	0.702772	0.188172	0.746675	0.845823	0.180513	1398	-0.13649	0.0966801	0.123938	-0.296903
eS6_RPS6B	AT5G10360	sp|P51430|RS62_ARATH 40S ribosomal protein S6-2 OS=Arabidopsis thaliana OX=3702 GN=RPS6B PE=1 SV=3	693.116	HORVU2Hr1G029890.1	1	HORVU2Hr1G029890.1 HORVU2Hr1G029890	chr2H:108643317-108645670	HC_G	40S ribosomal protein S6	GO:0003735, GO:0005622, GO:0005840, GO:0006412	PF01092	IPR001377, IPR014401, IPR018282	3	X471	0.00949509	0.239158	0.18316	0.448087	0.35882	0.686622	0.186374	375	-0.370033	0.142935	0.302179	-0.382579
eL33_RPL35aC	AT1G74270	sp|Q9C912|R35A3_ARATH 60S ribosomal protein L35a-3 OS=Arabidopsis thaliana OX=3702 GN=RPL35AC PE=3 SV=1	269.67	HORVU6Hr1G083120.2	1	HORVU6Hr1G083120.2 HORVU6Hr1G083120	chr6H:550448831-550450557	HC_G	60S ribosomal protein L35a-3	GO:0003735, GO:0005622, GO:0005840, GO:0006412	PF01247	IPR001780, IPR009000, IPR018266	3	NA	0.000320318	0.36788	0.243061	0.884491	0.716411	0.756411	0.202734	413	-0.348604	0.108117	0.350449	-0.244323
uL14_RPL23A,uL14_RPL23B,uL14_RPL23C	AT1G04480,AT2G33370,AT3G04400	sp|P49690|RL23_ARATH 60S ribosomal protein L23 OS=Arabidopsis thaliana OX=3702 GN=RPL23A PE=2 SV=3	575.702	HORVU6Hr1G090170.1;HORVU1Hr1G039160.1	2	HORVU1Hr1G039160.1 HORVU1Hr1G039160	chr1H:274026403-274028245	HC_G	50S ribosomal protein L14	GO:0003735, GO:0005840, GO:0006412	PF00238	IPR000218, IPR019972, IPR023571	3	NA	0.000234305	0.238659	0.403239	0.822077	0.80045	0.641682	0.202913	368	-0.335725	0.127719	0.38848	-0.222841
uL14_RPL23A,uL14_RPL23B,uL14_RPL23C	AT1G04480,AT2G33370,AT3G04400	sp|P49690|RL23_ARATH 60S ribosomal protein L23 OS=Arabidopsis thaliana OX=3702 GN=RPL23A PE=2 SV=3	460.459	HORVU6Hr1G090170.1;HORVU1Hr1G039160.1	1	HORVU6Hr1G090170.1 HORVU6Hr1G090170	chr6H:571460862-571463245	HC_G	50S ribosomal protein L14	GO:0003735, GO:0005840, GO:0006412	PF00238	IPR000218, IPR019972, IPR023571	3	NA	0.000234305	0.238659	0.403239	0.822077	0.80045	0.641682	0.202913	368	-0.335725	0.127719	0.38848	-0.222841
eS24_RPS24A	AT3G04920	sp|Q9SS17|RS241_ARATH 40S ribosomal protein S24-1 OS=Arabidopsis thaliana OX=3702 GN=RPS24A PE=2 SV=1	184.995	HORVU6Hr1G044840.1	1	HORVU6Hr1G044840.1 HORVU6Hr1G044840	chr6H:258696168-258828973	HC_G	40S ribosomal protein S24-2	GO:0000166, GO:0003735, GO:0005622, GO:0005840, GO:0006412	PF01282	IPR001976, IPR012677, IPR012678, IPR018098	3	NA	0.0276353	0.269835	0.328763	0.566025	0.226394	0.318154	0.213407	372	-0.311022	0.144982	0.358448	-0.120702
eS1_RPS3aB	AT4G34670	sp|Q42262|RS3A2_ARATH 40S ribosomal protein S3a-2 OS=Arabidopsis thaliana OX=3702 GN=RPS3AB PE=2 SV=3	504.031	HORVU1Hr1G032060.4	1	HORVU1Hr1G032060.4 HORVU1Hr1G032060	chr1H:197717447-197720315	HC_G	40S ribosomal protein S3a	GO:0003735, GO:0005622, GO:0005840, GO:0006412	PF01015	IPR001593, IPR018281, IPR027500	3	NA	0.00357038	0.392893	0.220464	0.0252419	0.829729	0.821255	0.216962	526	-0.163652	0.202536	0.184717	-0.401391
uL3_RPL3A	AT1G43170	sp|P17094|RL31_ARATH 60S ribosomal protein L3-1 OS=Arabidopsis thaliana OX=3702 GN=ARP1 PE=1 SV=5	995.763	HORVU4Hr1G019980.1	1	HORVU4Hr1G019980.1 HORVU4Hr1G019980	chr4H:96770575-96773221	HC_G	ribosomal protein 1	GO:0003735, GO:0005622, GO:0005840, GO:0006412	PF00297	IPR000597, IPR009000, IPR019926	3	NA	0.00116367	0.962055	0.600413	0.672982	0.877904	0.817638	0.219157	418	-0.331807	0.0535521	0.393279	-0.266042
uL2_RPL8A	AT2G18020	sp|P46286|RL81_ARATH 60S ribosomal protein L8-1 OS=Arabidopsis thaliana OX=3702 GN=RPL8A PE=1 SV=2	816.079	HORVU5Hr1G021730.2	1	HORVU5Hr1G021730.2 HORVU5Hr1G021730	chr5H:106967797-106969568	HC_G	50S ribosomal protein L2	GO:0003723, GO:0003735, GO:0005622, GO:0005840, GO:0006412, GO:0015934	PF00181, PF03947	IPR002171, IPR008991, IPR012340, IPR014722, IPR014726, IPR022666, IPR022669, IPR022671, IPR023672	3	NA	0.00139732	0.698095	0.530172	0.471776	0.814263	0.658692	0.219888	412	-0.352593	0.0866501	0.386044	-0.197479
IF2AH	AT2G40290	sp|Q9SIZ2|IF2AH_ARATH Eukaryotic translation initiation factor 2 subunit alpha homolog OS=Arabidopsis thaliana OX=3702 GN=At2g40290 PE=1 SV=2	532.468	HORVU4Hr1G055500.1	1	HORVU4Hr1G055500.1 HORVU4Hr1G055500	chr4H:465280399-465284288	HC_G	eukaryotic translation initiation factor 2 alpha subunit	GO:0003676, GO:0003723, GO:0003743, GO:0005850	PF00575, PF07541	IPR003029, IPR011488, IPR012340, IPR022967, IPR024054, IPR024055	5	NA	0.0288584	0.663389	0.570773	0.403002	0.778418	0.890039	0.223505	1608	-0.123592	0.103157	0.196316	-0.2059
TCTP1	AT5G57870	sp|P31265|TCTP1_ARATH Translationally-controlled tumor protein 1 OS=Arabidopsis thaliana OX=3702 GN=TCTP1 PE=1 SV=2	283.26	HORVU4Hr1G033200.1	1	HORVU4Hr1G033200.1 HORVU4Hr1G033200	chr4H:229702183-229704374	HC_G	translationally controlled tumor protein	none	PF00838	IPR011057, IPR011323, IPR018103, IPR018105	3	X405	0.390765	0.714606	0.287243	0.108075	0.80955	0.604126	0.234024	594	-0.401569	-0.269029	0.941164	0.0957568
uL16_RPL10B	AT1G26910	sp|Q08770|RL102_ARATH 60S ribosomal protein L10-2 OS=Arabidopsis thaliana OX=3702 GN=RPL10B PE=2 SV=2	525.758	HORVU1Hr1G024710.2	1	HORVU1Hr1G024710.2 HORVU1Hr1G024710	chr1H:115706038-115708321	HC_G	60S ribosomal protein L10-2	GO:0003735, GO:0005622, GO:0005840, GO:0006412	PF00252	IPR001197, IPR016180, IPR018255	3	NA	0.0248002	0.993832	0.253655	0.764502	0.930022	0.849172	0.234838	212	-0.185567	0.118173	0.281082	-0.17721
eL31_RPL31C	AT5G56710	sp|P51420|RL313_ARATH 60S ribosomal protein L31-3 OS=Arabidopsis thaliana OX=3702 GN=RPL31C PE=3 SV=2	130.697	HORVU6Hr1G070670.1	1	HORVU6Hr1G070670.1 HORVU6Hr1G070670	chr6H:492317577-492319739	HC_G	60S ribosomal protein L31	GO:0003735, GO:0005622, GO:0005840, GO:0006412	PF01198	IPR000054, IPR023621	3	NA	0.00305559	0.45552	0.205128	0.914906	0.82824	0.723464	0.238565	366	-0.353061	0.066368	0.370701	-0.250749
eL28_RPL28A	AT2G19730	sp|O82204|RL281_ARATH 60S ribosomal protein L28-1 OS=Arabidopsis thaliana OX=3702 GN=RPL28A PE=1 SV=1	129.482	HORVU3Hr1G066430.3	1	HORVU3Hr1G066430.3 HORVU3Hr1G066430	chr3H:505516326-505517488	HC_G	60S ribosomal protein L28-1	none	PF01778	IPR029004	3	NA	0.00386925	0.210744	0.157215	0.970405	0.571114	0.720746	0.24102	410	-0.332224	0.0792256	0.335366	-0.200856
eL36_RPL36B	AT3G53740	sp|Q9M352|RL362_ARATH 60S ribosomal protein L36-2 OS=Arabidopsis thaliana OX=3702 GN=RPL36B PE=3 SV=1	258.983	HORVU5Hr1G009600.1;HORVU1Hr1G072270.1;HORVU3Hr1G086410.2;HORVU5Hr1G009610.2	3	HORVU3Hr1G086410.2 HORVU3Hr1G086410	chr3H:616786077-616788095	HC_G	60S ribosomal protein L36-3	GO:0003735, GO:0005622, GO:0005840, GO:0006412	PF01158	IPR000509	3	NA	0.00045359	0.0186253	0.0190179	0.621719	0.18863	0.868263	0.241955	371	-0.376751	0.100807	0.275847	-0.249731
eL36_RPL36B	AT3G53740	sp|Q9M352|RL362_ARATH 60S ribosomal protein L36-2 OS=Arabidopsis thaliana OX=3702 GN=RPL36B PE=3 SV=1	240.542	HORVU5Hr1G009600.1;HORVU1Hr1G072270.1;HORVU3Hr1G086410.2;HORVU5Hr1G009610.2	2	HORVU1Hr1G072270.1 HORVU1Hr1G072270	chr1H:496930969-496933348	HC_G	60S ribosomal protein L36-2	GO:0003735, GO:0005622, GO:0005840, GO:0006412	PF01158	IPR000509	3	NA	0.00045359	0.0186253	0.0190179	0.621719	0.18863	0.868263	0.241955	371	-0.376751	0.100807	0.275847	-0.249731
eL36_RPL36B	AT3G53740	sp|Q9M352|RL362_ARATH 60S ribosomal protein L36-2 OS=Arabidopsis thaliana OX=3702 GN=RPL36B PE=3 SV=1	176.495	HORVU5Hr1G009600.1;HORVU1Hr1G072270.1;HORVU3Hr1G086410.2;HORVU5Hr1G009610.2	1	HORVU5Hr1G009600.1 HORVU5Hr1G009600	chr5H:23245645-23246890	HC_G	60S ribosomal protein L36-3	GO:0003735, GO:0005622, GO:0005840, GO:0006412	PF01158	IPR000509	3	NA	0.00045359	0.0186253	0.0190179	0.621719	0.18863	0.868263	0.241955	371	-0.376751	0.100807	0.275847	-0.249731
eL36_RPL36B	AT3G53740	sp|Q9M352|RL362_ARATH 60S ribosomal protein L36-2 OS=Arabidopsis thaliana OX=3702 GN=RPL36B PE=3 SV=1	128.922	HORVU5Hr1G009600.1;HORVU1Hr1G072270.1;HORVU3Hr1G086410.2;HORVU5Hr1G009610.2	4	HORVU5Hr1G009610.2 HORVU5Hr1G009610	chr5H:23346302-23348274	HC_G	60S ribosomal protein L36-3	GO:0003735, GO:0005622, GO:0005840, GO:0006412	PF01158	IPR000509	3	NA	0.00045359	0.0186253	0.0190179	0.621719	0.18863	0.868263	0.241955	371	-0.376751	0.100807	0.275847	-0.249731
uS12_RPS23B	AT5G02960	sp|P49201|RS232_ARATH 40S ribosomal protein S23-2 OS=Arabidopsis thaliana OX=3702 GN=RPS23B PE=2 SV=2	552.523	HORVU5Hr1G112390.1;HORVU5Hr1G066080.1;HORVU1Hr1G071570.1;HORVU3Hr1G087380.1	1	HORVU5Hr1G112390.1 HORVU5Hr1G112390	chr5H:639095929-639098900	HC_G	30S ribosomal protein S12	GO:0003735, GO:0005622, GO:0005840, GO:0006412, GO:0015935	PF00164	IPR005680, IPR006032, IPR012340	3	NA	0.229855	0.439656	0.463944	0.920648	0.428212	0.939801	0.242833	170	-0.173234	0.0843675	0.43931	-0.0874012
uS12_RPS23B	AT5G02960	sp|P49201|RS232_ARATH 40S ribosomal protein S23-2 OS=Arabidopsis thaliana OX=3702 GN=RPS23B PE=2 SV=2	552.523	HORVU5Hr1G112390.1;HORVU5Hr1G066080.1;HORVU1Hr1G071570.1;HORVU3Hr1G087380.1	2	HORVU5Hr1G066080.1 HORVU5Hr1G066080	chr5H:504928504-504931996	HC_G	30S ribosomal protein S12	GO:0003735, GO:0005622, GO:0005840, GO:0006412, GO:0015935	PF00164	IPR005680, IPR006032, IPR012340	3	NA	0.229855	0.439656	0.463944	0.920648	0.428212	0.939801	0.242833	170	-0.173234	0.0843675	0.43931	-0.0874012
uS12_RPS23B	AT5G02960	sp|P49201|RS232_ARATH 40S ribosomal protein S23-2 OS=Arabidopsis thaliana OX=3702 GN=RPS23B PE=2 SV=2	552.523	HORVU5Hr1G112390.1;HORVU5Hr1G066080.1;HORVU1Hr1G071570.1;HORVU3Hr1G087380.1	3	HORVU1Hr1G071570.1 HORVU1Hr1G071570	chr1H:493622114-493624232	HC_G	30S ribosomal protein S12	GO:0003735, GO:0005622, GO:0005840, GO:0006412, GO:0015935	PF00164	IPR005680, IPR006032, IPR012340	3	NA	0.229855	0.439656	0.463944	0.920648	0.428212	0.939801	0.242833	170	-0.173234	0.0843675	0.43931	-0.0874012
uS12_RPS23B	AT5G02960	sp|P49201|RS232_ARATH 40S ribosomal protein S23-2 OS=Arabidopsis thaliana OX=3702 GN=RPS23B PE=2 SV=2	358.523	HORVU5Hr1G112390.1;HORVU5Hr1G066080.1;HORVU1Hr1G071570.1;HORVU3Hr1G087380.1	4	HORVU3Hr1G087380.1 HORVU3Hr1G087380	chr3H:621112310-621113917	HC_G	30S ribosomal protein S12	GO:0003735, GO:0005622, GO:0005840, GO:0006412, GO:0015935	PF00164	IPR005680, IPR006032, IPR012340	3	NA	0.229855	0.439656	0.463944	0.920648	0.428212	0.939801	0.242833	170	-0.173234	0.0843675	0.43931	-0.0874012
uS11_RPS14C	AT3G52580	sp|P42036|RS143_ARATH 40S ribosomal protein S14-3 OS=Arabidopsis thaliana OX=3702 GN=RPS14C PE=2 SV=2	499.243	HORVU2Hr1G073150.1;HORVU0Hr1G004130.1	1	HORVU2Hr1G073150.1 HORVU2Hr1G073150	chr2H:526173045-526175589	HC_G	30S ribosomal protein S11	GO:0003735, GO:0005840, GO:0006412	PF00411	IPR001971, IPR018102	3	X59	0.00284595	0.458595	0.452854	0.658844	0.318331	0.862108	0.244165	436	-0.33517	0.123551	0.324787	-0.205887
uS11_RPS14C	AT3G52580	sp|P42036|RS143_ARATH 40S ribosomal protein S14-3 OS=Arabidopsis thaliana OX=3702 GN=RPS14C PE=2 SV=2	355.93	HORVU2Hr1G073150.1;HORVU0Hr1G004130.1	2	HORVU0Hr1G004130.1 HORVU0Hr1G004130	chrUn:21837754-21840749	HC_G	30S ribosomal protein S11	GO:0003735, GO:0005840, GO:0006412	PF00411	IPR001971, IPR018102	3	X59	0.00284595	0.458595	0.452854	0.658844	0.318331	0.862108	0.244165	436	-0.33517	0.123551	0.324787	-0.205887
tRNA-I	AT1G69410	sp|F4JLM5|SYIC_ARATH Isoleucine--tRNA ligase, cytoplasmic OS=Arabidopsis thaliana OX=3702 GN=At4g10320 PE=2 SV=1	1019.48	HORVU7Hr1G115280.8	1	HORVU7Hr1G115280.8 HORVU7Hr1G115280	chr7H:641086148-641099308	HC_G	Isoleucine--tRNA ligase	GO:0000166, GO:0002161, GO:0004812, GO:0004822, GO:0005524, GO:0005737, GO:0006418, GO:0006428	PF00133, PF08264	IPR001412, IPR002300, IPR002301, IPR009008, IPR009080, IPR013155, IPR014729, IPR023586	5	X461	0.259796	0.707364	0.901409	0.567762	0.594516	0.477418	0.246993	1434	-0.120146	0.0576629	0.0920291	-0.210181
uS7_RPS5A	AT2G37270	sp|Q9ZUT9|RS51_ARATH 40S ribosomal protein S5-1 OS=Arabidopsis thaliana OX=3702 GN=RPS5A PE=1 SV=1	397.017	HORVU3Hr1G015190.2	1	HORVU3Hr1G015190.2 HORVU3Hr1G015190	chr3H:35366284-35368003	HC_G	30S ribosomal protein S7	GO:0003723, GO:0003735, GO:0006412, GO:0015935	PF00177	IPR000235, IPR005716, IPR020606, IPR023798	3	NA	4.97133e-05	0.77535	0.431448	0.571442	0.766595	0.823105	0.248319	492	-0.494168	0.271346	0.389439	-0.544972
IF5Y	AT1G36730	sp|Q9C8F1|IF5Y_ARATH Probable eukaryotic translation initiation factor 5-1 OS=Arabidopsis thaliana OX=3702 GN=At1g36730 PE=2 SV=1	203.993	HORVU6Hr1G021630.5	1	HORVU6Hr1G021630.5 HORVU6Hr1G021630	chr6H:66485172-66488198	HC_G	Eukaryotic translation initiation factor 5	GO:0003743, GO:0005488, GO:0005515, GO:0006413	PF01873, PF02020	IPR002735, IPR003307, IPR016021, IPR016024, IPR016189, IPR016190	3	NA	0.190061	0.307375	0.123055	0.51266	0.29944	0.702064	0.259216	502	-0.199374	0.0637098	0.327203	-0.00594126
EF1A2	AT1G07930	sp|Q8W4H7|EF1A2_ARATH Elongation factor 1-alpha 2 OS=Arabidopsis thaliana OX=3702 GN=A2 PE=1 SV=2	1729.84	HORVU4Hr1G056740.5;HORVU5Hr1G100200.3;HORVU5Hr1G100700.3;HORVU4Hr1G056830.1;HORVU6Hr1G085370.2;HORVU6Hr1G085320.3	1	HORVU4Hr1G056740.5 HORVU4Hr1G056740	chr4H:476594220-476596820	HC_G	Elongation factor 1-alpha	GO:0003746, GO:0003924, GO:0005525, GO:0005737, GO:0006414	PF00009, PF03143, PF03144	IPR000795, IPR004160, IPR004161, IPR004539, IPR009000, IPR009001, IPR027417, IPR031157	3	NA	0.00743334	0.915252	0.553886	0.991684	0.615574	0.777293	0.262277	247	-0.261286	0.115844	0.292771	-0.241874
EF1A2	AT1G07930	sp|Q8W4H7|EF1A2_ARATH Elongation factor 1-alpha 2 OS=Arabidopsis thaliana OX=3702 GN=A2 PE=1 SV=2	1651.84	HORVU4Hr1G056740.5;HORVU5Hr1G100200.3;HORVU5Hr1G100700.3;HORVU4Hr1G056830.1;HORVU6Hr1G085370.2;HORVU6Hr1G085320.3	2	HORVU5Hr1G100200.3 HORVU5Hr1G100200	chr5H:611298406-611301181	HC_G	Elongation factor 1-alpha	GO:0003746, GO:0003924, GO:0005525, GO:0005737, GO:0006414	PF00009, PF03143, PF03144	IPR000795, IPR004160, IPR004161, IPR004539, IPR009000, IPR009001, IPR027417, IPR031157	3	NA	0.00743334	0.915252	0.553886	0.991684	0.615574	0.777293	0.262277	247	-0.261286	0.115844	0.292771	-0.241874
EF1A2	AT1G07930	sp|Q8W4H7|EF1A2_ARATH Elongation factor 1-alpha 2 OS=Arabidopsis thaliana OX=3702 GN=A2 PE=1 SV=2	1647.84	HORVU4Hr1G056740.5;HORVU5Hr1G100200.3;HORVU5Hr1G100700.3;HORVU4Hr1G056830.1;HORVU6Hr1G085370.2;HORVU6Hr1G085320.3	3	HORVU5Hr1G100700.3 HORVU5Hr1G100700	chr5H:611821185-611824186	HC_G	Elongation factor 1-alpha	GO:0003746, GO:0003924, GO:0005525, GO:0005737, GO:0006414	PF00009, PF03143, PF03144	IPR000795, IPR004160, IPR004161, IPR004539, IPR009000, IPR009001, IPR027417, IPR031157	3	NA	0.00743334	0.915252	0.553886	0.991684	0.615574	0.777293	0.262277	247	-0.261286	0.115844	0.292771	-0.241874
EF1A2	AT1G07930	sp|Q8W4H7|EF1A2_ARATH Elongation factor 1-alpha 2 OS=Arabidopsis thaliana OX=3702 GN=A2 PE=1 SV=2	1402.02	HORVU4Hr1G056740.5;HORVU5Hr1G100200.3;HORVU5Hr1G100700.3;HORVU4Hr1G056830.1;HORVU6Hr1G085370.2;HORVU6Hr1G085320.3	5	HORVU6Hr1G085370.2 HORVU6Hr1G085370	chr6H:558394508-558396897	HC_G	Elongation factor 1-alpha	GO:0003746, GO:0003924, GO:0005525, GO:0005737, GO:0006414	PF00009, PF03143, PF03144	IPR000795, IPR004160, IPR004161, IPR004539, IPR009000, IPR009001, IPR027417, IPR031157	3	NA	0.00743334	0.915252	0.553886	0.991684	0.615574	0.777293	0.262277	247	-0.261286	0.115844	0.292771	-0.241874
EF1A2	AT1G07930	sp|Q8W4H7|EF1A2_ARATH Elongation factor 1-alpha 2 OS=Arabidopsis thaliana OX=3702 GN=A2 PE=1 SV=2	1402.02	HORVU4Hr1G056740.5;HORVU5Hr1G100200.3;HORVU5Hr1G100700.3;HORVU4Hr1G056830.1;HORVU6Hr1G085370.2;HORVU6Hr1G085320.3	6	HORVU6Hr1G085320.3 HORVU6Hr1G085320	chr6H:558259944-558261822	HC_G	Elongation factor 1-alpha	GO:0003746, GO:0003924, GO:0005525, GO:0005737, GO:0006414	PF00009, PF03143, PF03144	IPR000795, IPR004160, IPR004161, IPR004539, IPR009000, IPR009001, IPR027417, IPR031157	3	NA	0.00743334	0.915252	0.553886	0.991684	0.615574	0.777293	0.262277	247	-0.261286	0.115844	0.292771	-0.241874
eL43_RPL37aB	AT3G10950	sp|Q9SRK6|R37A1_ARATH Putative 60S ribosomal protein L37a-1 OS=Arabidopsis thaliana OX=3702 GN=RPL37AB PE=3 SV=1	241.778	HORVU1Hr1G085170.5;HORVU3Hr1G062590.1;HORVU7Hr1G081910.1	1	HORVU1Hr1G085170.5 HORVU1Hr1G085170	chr1H:535194659-535196726	HC_G	60S ribosomal protein L37a	GO:0003735, GO:0005622, GO:0005840, GO:0006412	PF01780	IPR002674, IPR011331, IPR011332	3	NA	0.0132733	0.413131	0.292872	0.578838	0.64602	0.951327	0.26387	197	-0.334076	0.0353634	0.396253	-0.135352
eL43_RPL37aB	AT3G10950	sp|Q9SRK6|R37A1_ARATH Putative 60S ribosomal protein L37a-1 OS=Arabidopsis thaliana OX=3702 GN=RPL37AB PE=3 SV=1	236.465	HORVU1Hr1G085170.5;HORVU3Hr1G062590.1;HORVU7Hr1G081910.1	2	HORVU3Hr1G062590.1 HORVU3Hr1G062590	chr3H:477737855-477739885	HC_G	60S ribosomal protein L37a	GO:0003735, GO:0005622, GO:0005840, GO:0006412	PF01780	IPR002674, IPR011331, IPR011332	3	NA	0.0132733	0.413131	0.292872	0.578838	0.64602	0.951327	0.26387	197	-0.334076	0.0353634	0.396253	-0.135352
eL43_RPL37aB	AT3G10950	sp|Q9SRK6|R37A1_ARATH Putative 60S ribosomal protein L37a-1 OS=Arabidopsis thaliana OX=3702 GN=RPL37AB PE=3 SV=1	180.465	HORVU1Hr1G085170.5;HORVU3Hr1G062590.1;HORVU7Hr1G081910.1	3	HORVU7Hr1G081910.1 HORVU7Hr1G081910	chr7H:489454032-489456109	HC_G	60S ribosomal protein L37a	GO:0003735, GO:0005622, GO:0005840, GO:0006412	PF01780	IPR002674, IPR011331, IPR011332	3	NA	0.0132733	0.413131	0.292872	0.578838	0.64602	0.951327	0.26387	197	-0.334076	0.0353634	0.396253	-0.135352
eS6_RPS6B	AT5G10360	sp|P51430|RS62_ARATH 40S ribosomal protein S6-2 OS=Arabidopsis thaliana OX=3702 GN=RPS6B PE=1 SV=3	561.803	HORVU2Hr1G010870.8;HORVU2Hr1G010890.2	1	HORVU2Hr1G010870.8 HORVU2Hr1G010870	chr2H:21417078-21419777	HC_G	40S ribosomal protein S6	GO:0003735, GO:0005622, GO:0005840, GO:0006412	PF01092	IPR001377, IPR014401, IPR018282	3	X471	0.0344589	0.147047	0.0594277	0.876603	0.258805	0.299492	0.267798	378	-0.301186	0.0934037	0.28098	-0.132356
eS6_RPS6B	AT5G10360	sp|P51430|RS62_ARATH 40S ribosomal protein S6-2 OS=Arabidopsis thaliana OX=3702 GN=RPS6B PE=1 SV=3	404.787	HORVU2Hr1G010870.8;HORVU2Hr1G010890.2	2	HORVU2Hr1G010890.2 HORVU2Hr1G010890	chr2H:21428487-21429892	HC_G	40S ribosomal protein S6	GO:0003735, GO:0005622, GO:0005840, GO:0006412	PF01092	IPR001377, IPR014401, IPR018282	3	X471	0.0344589	0.147047	0.0594277	0.876603	0.258805	0.299492	0.267798	378	-0.301186	0.0934037	0.28098	-0.132356
tRNA-T	AT1G69410	sp|O04630|SYTM1_ARATH Threonine--tRNA ligase, mitochondrial 1 OS=Arabidopsis thaliana OX=3702 GN=THRRS PE=1 SV=3	673.496	HORVU3Hr1G012410.6	1	HORVU3Hr1G012410.6 HORVU3Hr1G012410	chr3H:26934313-26955710	HC_G	Threonine--tRNA ligase	GO:0000166, GO:0004812, GO:0004829, GO:0005524, GO:0005737, GO:0006418, GO:0006435, GO:0016876, GO:0043039	PF00587, PF02824, PF03129, PF07973	IPR002314, IPR002320, IPR004095, IPR004154, IPR006195, IPR012675, IPR012676, IPR012947, IPR018163	5	NA	0.3559	0.789366	0.883592	0.840797	0.835626	0.862545	0.27754	1850	-0.123038	0.000947313	0.140644	-0.130794
eL34_RPL34A	AT1G26880	sp|Q42351|RL341_ARATH 60S ribosomal protein L34-1 OS=Arabidopsis thaliana OX=3702 GN=RPL34A PE=2 SV=1	219.947	HORVU5Hr1G066000.1	1	HORVU5Hr1G066000.1 HORVU5Hr1G066000	chr5H:504580620-504582388	HC_G	60S ribosomal protein L34	GO:0003735, GO:0005622, GO:0005840, GO:0006412	PF01199	IPR008195, IPR018065	3	X471	0.00221049	0.045645	0.0196385	0.991704	0.272732	0.450794	0.278842	380	-0.38897	0.094011	0.294817	-0.203679
uS4_RPS9C	AT5G39850	sp|Q9FLF0|RS92_ARATH 40S ribosomal protein S9-2 OS=Arabidopsis thaliana OX=3702 GN=RPS9C PE=1 SV=1	400.03	HORVU2Hr1G028510.1	1	HORVU2Hr1G028510.1 HORVU2Hr1G028510	chr2H:97111015-97114741	HC_G	Ribosomal protein S4	GO:0003723, GO:0003735, GO:0005622, GO:0006412, GO:0015935, GO:0019843	PF00163, PF01479	IPR001912, IPR002942, IPR005710	3	NA	0.0373279	0.661515	0.517334	0.716123	0.834905	0.769345	0.284362	202	-0.196482	0.183645	0.324696	-0.213632
tRNA-V	AT1G69410	sp|P93736|SYVM1_ARATH Valine--tRNA ligase, mitochondrial 1 OS=Arabidopsis thaliana OX=3702 GN=TWN2 PE=1 SV=2	12.4383	HORVU3Hr1G022350.3	1	HORVU3Hr1G022350.3 HORVU3Hr1G022350	chr3H:78933756-79045796	HC_G	Valine--tRNA ligase	GO:0000166, GO:0002161, GO:0004812, GO:0004832, GO:0005524, GO:0006418, GO:0006438	PF00133	IPR001412, IPR002300, IPR002303, IPR009008, IPR009080, IPR014729	5	X183	0.062131	0.794014	0.995805	0.631941	0.618183	0.979153	0.286257	1395	-0.135373	0.0885303	0.153344	-0.213795
tRNA-S	AT1G69410	sp|Q39230|SYSC_ARATH Serine--tRNA ligase, cytoplasmic OS=Arabidopsis thaliana OX=3702 GN=At5g27470 PE=1 SV=1	519.01	HORVU6Hr1G080800.2	1	HORVU6Hr1G080800.2 HORVU6Hr1G080800	chr6H:542860232-542864364	HC_G	Serine--tRNA ligase	GO:0000166, GO:0004812, GO:0004828, GO:0005524, GO:0005737, GO:0006418, GO:0006434	PF00587, PF02403	IPR002314, IPR002317, IPR006195, IPR010978, IPR015866	5	NA	0.0444403	0.845717	0.0891336	0.125206	0.968621	0.71461	0.295866	1422	-0.0992498	0.123514	0.129856	-0.223362
eS31_RPS27aB	AT2G47110	sp|P59232|R27AB_ARATH Ubiquitin-40S ribosomal protein S27a-2 OS=Arabidopsis thaliana OX=3702 GN=RPS27AB PE=2 SV=2	443.13	HORVU1Hr1G023660.1;HORVU1Hr1G043930.8;HORVU7Hr1G103170.9;HORVU2Hr1G104440.1;HORVU6Hr1G026200.5;HORVU0Hr1G038500.2;HORVU6Hr1G014970.1;HORVU7Hr1G103550.4;HORVU6Hr1G014960.1;HORVU6Hr1G016150.3;HORVU1Hr1G087690.8;HORVU6Hr1G020140.6;HORVU5Hr1G019590.12;HORVU5Hr1G019600.6;HORVU7Hr1G103160.4;HORVU2Hr1G104410.26;HORVU7Hr1G102840.1;HORVU6Hr1G021700.4;HORVU7Hr1G103330.1;HORVU7Hr1G107010.1;HORVU7Hr1G109650.…	1	HORVU1Hr1G023660.1 HORVU1Hr1G023660	chr1H:104959326-104960686	HC_G	ubiquitin 5	GO:0003735, GO:0005515, GO:0005840, GO:0006412	PF00240, PF01599	IPR000626, IPR002906, IPR011332, IPR019954, IPR019956, IPR029071	5	X996	0.407176	0.26815	0.141897	0.795024	0.691516	0.746245	0.303842	1847	-0.115622	0.0231021	0.19613	-0.0558795
eL40_RPL40A	AT2G36170	sp|B9DHA6|RL40A_ARATH Ubiquitin-60S ribosomal protein L40-1 OS=Arabidopsis thaliana OX=3702 GN=RPL40A PE=2 SV=1	305.477	HORVU1Hr1G023660.1;HORVU1Hr1G043930.8;HORVU7Hr1G103170.9;HORVU2Hr1G104440.1;HORVU6Hr1G026200.5;HORVU0Hr1G038500.2;HORVU6Hr1G014970.1;HORVU7Hr1G103550.4;HORVU6Hr1G014960.1;HORVU6Hr1G016150.3;HORVU1Hr1G087690.8;HORVU6Hr1G020140.6;HORVU5Hr1G019590.12;HORVU5Hr1G019600.6;HORVU7Hr1G103160.4;HORVU2Hr1G104410.26;HORVU7Hr1G102840.1;HORVU6Hr1G021700.4;HORVU7Hr1G103330.1;HORVU7Hr1G107010.1;HORVU7Hr1G109650.…	21	HORVU7Hr1G109650.2 HORVU7Hr1G109650	chr7H:628423843-628424545	HC_G	ubiquitin 4	GO:0003735, GO:0005515, GO:0005840, GO:0006412	PF00240, PF01020	IPR000626, IPR001975, IPR011332, IPR019954, IPR019956, IPR029071	5	X996	0.407176	0.26815	0.141897	0.795024	0.691516	0.746245	0.303842	1847	-0.115622	0.0231021	0.19613	-0.0558795
eL40_RPL40A	AT2G36170	sp|B9DHA6|RL40A_ARATH Ubiquitin-60S ribosomal protein L40-1 OS=Arabidopsis thaliana OX=3702 GN=RPL40A PE=2 SV=1	261.222	HORVU1Hr1G023660.1;HORVU1Hr1G043930.8;HORVU7Hr1G103170.9;HORVU2Hr1G104440.1;HORVU6Hr1G026200.5;HORVU0Hr1G038500.2;HORVU6Hr1G014970.1;HORVU7Hr1G103550.4;HORVU6Hr1G014960.1;HORVU6Hr1G016150.3;HORVU1Hr1G087690.8;HORVU6Hr1G020140.6;HORVU5Hr1G019590.12;HORVU5Hr1G019600.6;HORVU7Hr1G103160.4;HORVU2Hr1G104410.26;HORVU7Hr1G102840.1;HORVU6Hr1G021700.4;HORVU7Hr1G103330.1;HORVU7Hr1G107010.1;HORVU7Hr1G109650.…	23	HORVU4Hr1G001170.5 HORVU4Hr1G001170	chr4H:1791494-1792119	HC_G	ubiquitin 4	GO:0003735, GO:0005515, GO:0005840, GO:0006412	PF00240, PF01020	IPR000626, IPR001975, IPR019954, IPR019956, IPR029071	5	X996	0.407176	0.26815	0.141897	0.795024	0.691516	0.746245	0.303842	1847	-0.115622	0.0231021	0.19613	-0.0558795
eL40_RPL40A	AT2G36170	sp|B9DHA6|RL40A_ARATH Ubiquitin-60S ribosomal protein L40-1 OS=Arabidopsis thaliana OX=3702 GN=RPL40A PE=2 SV=1	258.038	HORVU1Hr1G023660.1;HORVU1Hr1G043930.8;HORVU7Hr1G103170.9;HORVU2Hr1G104440.1;HORVU6Hr1G026200.5;HORVU0Hr1G038500.2;HORVU6Hr1G014970.1;HORVU7Hr1G103550.4;HORVU6Hr1G014960.1;HORVU6Hr1G016150.3;HORVU1Hr1G087690.8;HORVU6Hr1G020140.6;HORVU5Hr1G019590.12;HORVU5Hr1G019600.6;HORVU7Hr1G103160.4;HORVU2Hr1G104410.26;HORVU7Hr1G102840.1;HORVU6Hr1G021700.4;HORVU7Hr1G103330.1;HORVU7Hr1G107010.1;HORVU7Hr1G109650.…	22	HORVU4Hr1G065100.3 HORVU4Hr1G065100	chr4H:543439817-543440440	HC_G	ubiquitin 6	GO:0003735, GO:0005515, GO:0005840, GO:0006412	PF00240, PF01020	IPR000626, IPR001975, IPR019954, IPR019956, IPR029071	5	X996	0.407176	0.26815	0.141897	0.795024	0.691516	0.746245	0.303842	1847	-0.115622	0.0231021	0.19613	-0.0558795
eL40_RPL40A	AT2G36170	sp|B9DHA6|RL40A_ARATH Ubiquitin-60S ribosomal protein L40-1 OS=Arabidopsis thaliana OX=3702 GN=RPL40A PE=2 SV=1	105.036	HORVU1Hr1G023660.1;HORVU1Hr1G043930.8;HORVU7Hr1G103170.9;HORVU2Hr1G104440.1;HORVU6Hr1G026200.5;HORVU0Hr1G038500.2;HORVU6Hr1G014970.1;HORVU7Hr1G103550.4;HORVU6Hr1G014960.1;HORVU6Hr1G016150.3;HORVU1Hr1G087690.8;HORVU6Hr1G020140.6;HORVU5Hr1G019590.12;HORVU5Hr1G019600.6;HORVU7Hr1G103160.4;HORVU2Hr1G104410.26;HORVU7Hr1G102840.1;HORVU6Hr1G021700.4;HORVU7Hr1G103330.1;HORVU7Hr1G107010.1;HORVU7Hr1G109650.…	16	HORVU2Hr1G104410.26 HORVU2Hr1G104410	chr2H:703632777-703637381	HC_G	ubiquitin 7	GO:0003735, GO:0005515, GO:0005840, GO:0006412	PF00240, PF01020	IPR000626, IPR001975, IPR019954, IPR019956, IPR029071	5	X996	0.407176	0.26815	0.141897	0.795024	0.691516	0.746245	0.303842	1847	-0.115622	0.0231021	0.19613	-0.0558795
eL37_RPL37B	AT1G52300	sp|Q43292|RL372_ARATH 60S ribosomal protein L37-2 OS=Arabidopsis thaliana OX=3702 GN=RPL37B PE=3 SV=2	211.103	HORVU6Hr1G005390.1;HORVU6Hr1G090070.1	1	HORVU6Hr1G005390.1 HORVU6Hr1G005390	chr6H:12012122-12015583	HC_G	60S ribosomal protein L37-2	GO:0003735, GO:0005622, GO:0005840, GO:0006412	PF01907	IPR001569, IPR011331, IPR011332, IPR018267	3	NA	0.0207126	0.28939	0.361682	0.0222767	0.51004	0.872641	0.31072	507	-0.338965	0.0310631	0.179365	0.0579361
eL37_RPL37B	AT1G52300	sp|Q43292|RL372_ARATH 60S ribosomal protein L37-2 OS=Arabidopsis thaliana OX=3702 GN=RPL37B PE=3 SV=2	112.231	HORVU6Hr1G005390.1;HORVU6Hr1G090070.1	2	HORVU6Hr1G090070.1 HORVU6Hr1G090070	chr6H:571355681-571357186	HC_G	60S ribosomal protein L37-2	GO:0003735, GO:0005622, GO:0005840, GO:0006412	PF01907	IPR001569, IPR011331, IPR011332, IPR018267	3	NA	0.0207126	0.28939	0.361682	0.0222767	0.51004	0.872641	0.31072	507	-0.338965	0.0310631	0.179365	0.0579361
tRNA-F	AT1G69410	sp|Q9T034|SYFA_ARATH Phenylalanine--tRNA ligase alpha subunit, cytoplasmic OS=Arabidopsis thaliana OX=3702 GN=At4g39280 PE=2 SV=3	145.899	HORVU5Hr1G061970.11	1	HORVU5Hr1G061970.11 HORVU5Hr1G061970	chr5H:482626848-482692111	HC_G	Phenylalanine--tRNA ligase alpha subunit	GO:0000049, GO:0000166, GO:0004812, GO:0004826, GO:0005524, GO:0005737, GO:0006418, GO:0006432, GO:0043039	PF01409	IPR002319, IPR004529, IPR006195	5	NA	0.128862	0.920636	0.654457	0.153997	0.828945	0.861512	0.314837	1438	-0.0874462	0.0842765	0.0822039	-0.26677
eS4_RPS4D	AT5G58420	sp|Q8VYK6|RS43_ARATH 40S ribosomal protein S4-3 OS=Arabidopsis thaliana OX=3702 GN=RPS4D PE=2 SV=2	827.66	HORVU1Hr1G021720.1	1	HORVU1Hr1G021720.1 HORVU1Hr1G021720	chr1H:88880792-88883398	HC_G	40S ribosomal protein S4	GO:0003723, GO:0003735, GO:0005622, GO:0005840, GO:0006412	PF00467, PF00900, PF01479, PF08071, PF16121	IPR000876, IPR002942, IPR005824, IPR013843, IPR013845, IPR018199, IPR032277	3	NA	0.000814269	0.415722	0.189225	0.956031	0.701499	0.8152	0.320483	438	-0.363917	0.109841	0.410611	-0.280797
eL21_RPL21A,eL21_RPL21C	AT1G09590,AT1G09690	sp|Q43291|RL211_ARATH 60S ribosomal protein L21-1 OS=Arabidopsis thaliana OX=3702 GN=RPL21A PE=2 SV=2	500.61	HORVU1Hr1G038890.1	1	HORVU1Hr1G038890.1 HORVU1Hr1G038890	chr1H:271292873-271294712	HC_G	60S ribosomal protein L21-1	GO:0003735, GO:0005622, GO:0005840, GO:0006412	PF01157	IPR001147, IPR008991, IPR018259	3	NA	0.00165359	0.256952	0.152972	0.997217	0.620907	0.727605	0.327878	411	-0.343637	0.0953785	0.317197	-0.223528
EF1A2	AT1G07930	sp|Q8W4H7|EF1A2_ARATH Elongation factor 1-alpha 2 OS=Arabidopsis thaliana OX=3702 GN=A2 PE=1 SV=2	1697.78	HORVU0Hr1G017020.1;HORVU2Hr1G013680.1	1	HORVU0Hr1G017020.1 HORVU0Hr1G017020	chrUn:91412363-91415524	HC_G	Elongation factor 1-alpha	GO:0003746, GO:0003924, GO:0005525, GO:0005737, GO:0006414	PF00009, PF03143, PF03144	IPR000795, IPR004160, IPR004161, IPR004539, IPR009000, IPR009001, IPR027417, IPR031157	3	X1872	0.0309691	0.65455	0.787521	0.500471	0.805529	0.838702	0.33443	182	-0.324814	-0.0409153	0.31235	-0.244718
EF1A2	AT1G07930	sp|Q8W4H7|EF1A2_ARATH Elongation factor 1-alpha 2 OS=Arabidopsis thaliana OX=3702 GN=A2 PE=1 SV=2	1697.78	HORVU0Hr1G017020.1;HORVU2Hr1G013680.1	2	HORVU2Hr1G013680.1 HORVU2Hr1G013680	chr2H:29621821-29625136	HC_G	Elongation factor 1-alpha	GO:0003746, GO:0003924, GO:0005525, GO:0005737, GO:0006414	PF00009, PF03143, PF03144	IPR000795, IPR004160, IPR004161, IPR004539, IPR009000, IPR009001, IPR027417, IPR031157	3	X1872	0.0309691	0.65455	0.787521	0.500471	0.805529	0.838702	0.33443	182	-0.324814	-0.0409153	0.31235	-0.244718
tRNA-L	AT1G69410	sp|F4I116|SYLC_ARATH Leucine--tRNA ligase, cytoplasmic OS=Arabidopsis thaliana OX=3702 GN=At1g09620 PE=1 SV=1	1209.81	HORVU2Hr1G026750.9	1	HORVU2Hr1G026750.9 HORVU2Hr1G026750	chr2H:86120914-86124405	HC_G	Leucine--tRNA ligase	GO:0000166, GO:0002161, GO:0004812, GO:0004823, GO:0005524, GO:0005737, GO:0006418, GO:0006429	PF00133, PF08264	IPR001412, IPR002300, IPR004493, IPR009008, IPR009080, IPR013155, IPR014729	5	NA	0.0249018	0.992344	0.699331	0.743632	0.584335	0.808216	0.334865	1382	-0.148538	0.100196	0.163997	-0.175762
tRNA-D	AT1G69410	sp|Q9M084|SYDC2_ARATH Aspartate--tRNA ligase 2, cytoplasmic OS=Arabidopsis thaliana OX=3702 GN=IBI1 PE=1 SV=1	285.919	HORVU5Hr1G050160.1	1	HORVU5Hr1G050160.1 HORVU5Hr1G050160	chr5H:388730361-388736731	HC_G	Asparagine--tRNA ligase	GO:0000166, GO:0004812, GO:0004815, GO:0005524, GO:0005737, GO:0006418, GO:0006422	PF00152	IPR002312, IPR004364, IPR004523, IPR006195, IPR012340	5	X269	0.295524	0.439516	0.895109	0.337146	0.857234	0.994528	0.335219	1481	-0.0762205	0.0301525	0.0259901	-0.227523
uL1_RPL10aA	AT1G08360	sp|Q8VZB9|R10A1_ARATH 60S ribosomal protein L10a-1 OS=Arabidopsis thaliana OX=3702 GN=RPL10AA PE=1 SV=1	582.802	HORVU3Hr1G084310.1	1	HORVU3Hr1G084310.1 HORVU3Hr1G084310	chr3H:606944820-606947945	HC_G	60S ribosomal protein L1-A	GO:0003723, GO:0003735, GO:0006412, GO:0015934	PF00687	IPR002143, IPR016094, IPR016095, IPR023673, IPR023674, IPR028364	3	X352	0.00659278	0.843653	0.720182	0.431819	0.51291	0.938956	0.346909	477	-0.203489	0.159618	0.197366	-0.306978
tRNA-W	AT1G69410	sp|Q9SR15|SYWC_ARATH Tryptophan--tRNA ligase, cytoplasmic OS=Arabidopsis thaliana OX=3702 GN=At3g04600 PE=2 SV=1	607.339	HORVU5Hr1G025320.6	1	HORVU5Hr1G025320.6 HORVU5Hr1G025320	chr5H:138069281-138073403	HC_G	Tryptophan--tRNA ligase	GO:0000166, GO:0004812, GO:0004830, GO:0005524, GO:0005737, GO:0006418, GO:0006436	PF00579	IPR001412, IPR002305, IPR002306, IPR014729	5	NA	0.456335	0.781346	0.659686	0.276031	0.959519	0.547587	0.352191	1426	0.0179696	0.127824	0.112055	-0.116764
eS24_RPS24A	AT3G04920	sp|Q9SS17|RS241_ARATH 40S ribosomal protein S24-1 OS=Arabidopsis thaliana OX=3702 GN=RPS24A PE=2 SV=1	206.308	HORVU7Hr1G088580.1;HORVU2Hr1G055560.1	1	HORVU7Hr1G088580.1 HORVU7Hr1G088580	chr7H:537951250-537953582	HC_G	40S ribosomal protein S24-2	GO:0000166, GO:0003735, GO:0005622, GO:0005840, GO:0006412	PF01282	IPR001976, IPR012677, IPR012678, IPR018098	3	X471	0.0430312	0.259311	0.0831645	0.854681	0.422636	0.243397	0.357102	376	-0.25484	0.0973931	0.217358	-0.15696
eS24_RPS24A	AT3G04920	sp|Q9SS17|RS241_ARATH 40S ribosomal protein S24-1 OS=Arabidopsis thaliana OX=3702 GN=RPS24A PE=2 SV=1	17.4926	HORVU7Hr1G088580.1;HORVU2Hr1G055560.1	2	HORVU2Hr1G055560.1 HORVU2Hr1G055560	chr2H:345142696-345144581	HC_G	40S ribosomal protein S24-2	GO:0000166, GO:0003735, GO:0005622, GO:0005840, GO:0006412	PF01282	IPR001976, IPR012677, IPR012678, IPR018098	3	X471	0.0430312	0.259311	0.0831645	0.854681	0.422636	0.243397	0.357102	376	-0.25484	0.0973931	0.217358	-0.15696
eL28_RPL28A	AT2G19730	sp|O82204|RL281_ARATH 60S ribosomal protein L28-1 OS=Arabidopsis thaliana OX=3702 GN=RPL28A PE=1 SV=1	82.1079	HORVU1Hr1G079370.1	1	HORVU1Hr1G079370.1 HORVU1Hr1G079370	chr1H:522834724-522837858	HC_G	60S ribosomal protein L28-1	none	PF01778	IPR029004	3	NA	0.0221154	0.20919	0.252689	0.587716	0.391185	0.973951	0.365383	373	-0.395519	0.052345	0.308636	-0.167789
tRNA-E	AT1G69410	sp|O82462|SYEC_ARATH Glutamate--tRNA ligase, cytoplasmic OS=Arabidopsis thaliana OX=3702 GN=At5g26710 PE=1 SV=1	540.955	HORVU3Hr1G038360.1;HORVU1Hr1G078370.2	1	HORVU3Hr1G038360.1 HORVU3Hr1G038360	chr3H:221289077-221294341	HC_G	Glutamine--tRNA ligase	GO:0000166, GO:0004812, GO:0004818, GO:0005524, GO:0005737, GO:0006412, GO:0006418, GO:0006424, GO:0016876, GO:0043039	PF00749, PF03950, PF14497	IPR000924, IPR001412, IPR004046, IPR004526, IPR010987, IPR011035, IPR012336, IPR014729, IPR020056, IPR020058, IPR020059, IPR020061	5	NA	0.900981	0.92663	0.303665	0.252755	0.507117	0.442033	0.40168	1753	-0.0401136	0.027574	-0.0118856	-0.156534
tRNA-E	AT1G69410	sp|O82462|SYEC_ARATH Glutamate--tRNA ligase, cytoplasmic OS=Arabidopsis thaliana OX=3702 GN=At5g26710 PE=1 SV=1	335.211	HORVU3Hr1G038360.1;HORVU1Hr1G078370.2	2	HORVU1Hr1G078370.2 HORVU1Hr1G078370	chr1H:520099417-520103471	HC_G	Glutamine--tRNA ligase	GO:0000166, GO:0004812, GO:0004818, GO:0005524, GO:0005737, GO:0006412, GO:0006418, GO:0006424, GO:0016876, GO:0043039	PF00749, PF03950, PF14497	IPR000924, IPR001412, IPR004046, IPR004526, IPR010987, IPR011035, IPR012336, IPR014729, IPR020056, IPR020058, IPR020059, IPR020061	5	NA	0.900981	0.92663	0.303665	0.252755	0.507117	0.442033	0.40168	1753	-0.0401136	0.027574	-0.0118856	-0.156534
uS17_RPS11C	AT5G23740	sp|P42733|RS113_ARATH 40S ribosomal protein S11-3 OS=Arabidopsis thaliana OX=3702 GN=RPS11C PE=2 SV=2	237.656	HORVU2Hr1G099230.8	1	HORVU2Hr1G099230.8 HORVU2Hr1G099230	chr2H:687150086-687152467	HC_G	40S ribosomal protein S11	GO:0003735, GO:0005622, GO:0005840, GO:0006412	PF00366, PF16205	IPR000266, IPR012340, IPR019979, IPR028333, IPR032440	3	X471	0.00647229	0.20617	0.0475232	0.724514	0.517978	0.760956	0.439878	379	-0.341225	0.0767827	0.294569	-0.146221
eL29_RPL29A	AT3G06700	sp|Q9M7X7|RL291_ARATH 60S ribosomal protein L29-1 OS=Arabidopsis thaliana OX=3702 GN=RPL29A PE=1 SV=1	99.9182	HORVU1Hr1G059570.2	1	HORVU1Hr1G059570.2 HORVU1Hr1G059570	chr1H:433922139-433923652	HC_G	60S ribosomal protein L29-1	GO:0003735, GO:0005622, GO:0005840, GO:0006412	PF01779	IPR002673	3	NA	0.0510952	0.101067	0.365713	0.110658	0.0360153	0.849639	0.465582	508	-0.554957	-0.0161743	0.57236	-0.130342
RPS3	ATMG00090	sp|Q95749|RT03_ARATH Ribosomal protein S3, mitochondrial OS=Arabidopsis thaliana OX=3702 GN=RPS3 PE=2 SV=3	807.053	HORVU0Hr1G011510.1	1	HORVU0Hr1G011510.1 HORVU0Hr1G011510	chrUn:65552328-65557511	HC_G	30S ribosomal protein S3	GO:0003735, GO:0005840, GO:0006412	PF00189	IPR001351, IPR018280	5	NA	0.0313821	0.203388	0.66268	0.353109	0.71256	0.596804	0.49709	2314	-0.163074	0.138657	0.0593085	-0.427581
tRNA-E	AT1G69410	sp|Q9FEA2|SYEM_ARATH Glutamate--tRNA ligase, chloroplastic/mitochondrial OS=Arabidopsis thaliana OX=3702 GN=OVA3 PE=1 SV=1	757.919	HORVU6Hr1G012710.2	1	HORVU6Hr1G012710.2 HORVU6Hr1G012710	chr6H:25052387-25056598	HC_G	Glutamate--tRNA ligase	GO:0000049, GO:0000166, GO:0004812, GO:0004818, GO:0005524, GO:0005737, GO:0006418, GO:0006424, GO:0016876, GO:0043039	PF00749	IPR000924, IPR001412, IPR004527, IPR008925, IPR014729, IPR020058, IPR020061, IPR020751	5	NA	0.735404	0.722629	0.698004	0.642118	0.28687	0.674171	0.501245	2235	-0.0587671	-0.0160604	-0.0715953	-0.149116
eL15_RPL15A	AT4G16720	sp|O23515|RL151_ARATH 60S ribosomal protein L15-1 OS=Arabidopsis thaliana OX=3702 GN=RPL15A PE=2 SV=1	454.699	HORVU5Hr1G048830.1;HORVU2Hr1G052650.1	1	HORVU5Hr1G048830.1 HORVU5Hr1G048830	chr5H:378885026-378887021	HC_G	60S ribosomal protein L15-1	GO:0003735, GO:0005622, GO:0005840, GO:0006412	PF00827	IPR000439, IPR012678, IPR020925, IPR024794	3	NA	0.000311773	0.490346	0.409555	0.149713	0.843587	0.846687	0.503162	382	-0.328585	0.125142	0.206323	-0.0910439
eL15_RPL15A	AT4G16720	sp|O23515|RL151_ARATH 60S ribosomal protein L15-1 OS=Arabidopsis thaliana OX=3702 GN=RPL15A PE=2 SV=1	425.386	HORVU5Hr1G048830.1;HORVU2Hr1G052650.1	2	HORVU2Hr1G052650.1 HORVU2Hr1G052650	chr2H:315819990-315832035	HC_G	60S ribosomal protein L15-1	GO:0003735, GO:0005622, GO:0005840, GO:0006412	PF00827	IPR000439, IPR012678, IPR020925, IPR024794	3	NA	0.000311773	0.490346	0.409555	0.149713	0.843587	0.846687	0.503162	382	-0.328585	0.125142	0.206323	-0.0910439
AtTIF3A1	AT4G11420	sp|Q9LD55|EIF3A_ARATH Eukaryotic translation initiation factor 3 subunit A OS=Arabidopsis thaliana OX=3702 GN=TIF3A1 PE=1 SV=1	62.9314	HORVU3Hr1G006000.1	1	HORVU3Hr1G006000.1 HORVU3Hr1G006000	chr3H:14947387-14955556	HC_G	Eukaryotic translation initiation factor 3 subunit A	GO:0005515, GO:0005852	PF01399	IPR000717, IPR027512	5	X183	0.0593603	0.914215	0.735486	0.972655	0.753343	0.958855	0.528299	1393	-0.155471	0.0872127	0.169937	-0.152668
EFGM2	AT2G45030	sp|F4IW10|EFGM2_ARATH Elongation factor G-2, mitochondrial OS=Arabidopsis thaliana OX=3702 GN=MEFG2 PE=1 SV=1	1692.38	HORVU7Hr1G082910.2	1	HORVU7Hr1G082910.2 HORVU7Hr1G082910	chr7H:498793193-498812988	HC_G	Elongation factor G 1	GO:0003746, GO:0003924, GO:0005525, GO:0005622, GO:0006414	PF00009, PF00679, PF03144, PF03764, PF14492	IPR000640, IPR000795, IPR004161, IPR004540, IPR005225, IPR005517, IPR009000, IPR009022, IPR014721, IPR020568, IPR027417, IPR031157	3	NA	0.00821832	0.721367	0.508672	0.438863	0.816995	0.665917	0.530856	301	-0.172599	0.144543	0.196463	-0.281052
IF4E5	AT5G18110	sp|Q9FK59|IF4E5_ARATH Eukaryotic translation initiation factor NCBP OS=Arabidopsis thaliana OX=3702 GN=NCBP PE=2 SV=1	262.273	HORVU4Hr1G061500.4	1	HORVU4Hr1G061500.4 HORVU4Hr1G061500	chr4H:516126727-516130946	HC_G	eukaryotic translation initiation factor 4E	GO:0003723, GO:0003743, GO:0005737, GO:0006413	PF01652	IPR001040, IPR019770, IPR023398	3	NA	0.0127831	0.264102	0.960569	0.308029	0.900721	0.537856	0.553675	175	-0.247617	0.100036	0.216145	-0.153742
tRNA-M	AT1G69410	sp|Q9SVN5|SYMC_ARATH Methionine--tRNA ligase, cytoplasmic OS=Arabidopsis thaliana OX=3702 GN=At4g13780 PE=2 SV=1	1224.73	HORVU0Hr1G011560.1;HORVU5Hr1G018330.2	2	HORVU5Hr1G018330.2 HORVU5Hr1G018330	chr5H:74251771-74258147	HC_G	Methionine--tRNA ligase	GO:0000049, GO:0000166, GO:0004812, GO:0004825, GO:0005524, GO:0005737, GO:0006418, GO:0006431	PF01588, PF09334	IPR001412, IPR002547, IPR009080, IPR012340, IPR014729, IPR014758, IPR015413, IPR023458, IPR029038	5	NA	0.0735112	0.775152	0.983558	0.570531	0.600095	0.99294	0.556833	1401	-0.112889	0.0938397	0.0802438	-0.198836
tRNA-M	AT1G69410	sp|Q9SVN5|SYMC_ARATH Methionine--tRNA ligase, cytoplasmic OS=Arabidopsis thaliana OX=3702 GN=At4g13780 PE=2 SV=1	1056.16	HORVU0Hr1G011560.1;HORVU5Hr1G018330.2	1	HORVU0Hr1G011560.1 HORVU0Hr1G011560	chrUn:65635848-65642722	HC_G	Methionine--tRNA ligase	GO:0000049, GO:0000166, GO:0004812, GO:0004825, GO:0005524, GO:0005737, GO:0006418, GO:0006431	PF01588, PF09334	IPR001412, IPR002547, IPR009080, IPR012340, IPR014729, IPR014758, IPR015413, IPR023458, IPR029038	5	NA	0.0735112	0.775152	0.983558	0.570531	0.600095	0.99294	0.556833	1401	-0.112889	0.0938397	0.0802438	-0.198836
eL13_RPL13B	AT3G49010	sp|P41127|RL131_ARATH 60S ribosomal protein L13-1 OS=Arabidopsis thaliana OX=3702 GN=RPL13B PE=1 SV=1	520.207	HORVU6Hr1G009400.2;HORVU7Hr1G067060.1	1	HORVU6Hr1G009400.2 HORVU6Hr1G009400	chr6H:16749096-16751247	HC_G	60S ribosomal protein L13-1	GO:0003735, GO:0005622, GO:0005840, GO:0006412	PF01294	IPR001380, IPR018256	3	X471	0.0479025	0.203648	0.144568	0.731997	0.17721	0.595888	0.594051	377	-0.29369	0.102978	0.227914	-0.1147
eL13_RPL13B	AT3G49010	sp|P41127|RL131_ARATH 60S ribosomal protein L13-1 OS=Arabidopsis thaliana OX=3702 GN=RPL13B PE=1 SV=1	498.833	HORVU6Hr1G009400.2;HORVU7Hr1G067060.1	2	HORVU7Hr1G067060.1 HORVU7Hr1G067060	chr7H:347129641-347132048	HC_G	60S ribosomal protein L13-1	GO:0003735, GO:0005622, GO:0005840, GO:0006412	PF01294	IPR001380, IPR018256	3	X471	0.0479025	0.203648	0.144568	0.731997	0.17721	0.595888	0.594051	377	-0.29369	0.102978	0.227914	-0.1147
tRNA-P	AT1G69410	sp|Q9M1R2|SYPC_ARATH Proline--tRNA ligase, cytoplasmic OS=Arabidopsis thaliana OX=3702 GN=At3g62120 PE=1 SV=1	946.239	HORVU3Hr1G093050.2	1	HORVU3Hr1G093050.2 HORVU3Hr1G093050	chr3H:640786088-640793553	HC_G	Proline--tRNA ligase	GO:0000166, GO:0004812, GO:0004827, GO:0005524, GO:0005737, GO:0006418, GO:0006433	PF00587, PF03129, PF09180	IPR002314, IPR002316, IPR004154, IPR004499, IPR006195, IPR016061, IPR017449	5	NA	0.471712	0.943856	0.876839	0.789404	0.788672	0.936547	0.707726	2029	-0.0287364	0.0649576	-0.0407242	-0.0685208
eL42_RPL36aA,eL42_RPL36aB	AT3G23390,AT4G14320	sp|O23290|RL36A_ARATH 60S ribosomal protein L36a OS=Arabidopsis thaliana OX=3702 GN=RPL36AA PE=3 SV=3	150.2	HORVU5Hr1G081590.1;HORVU5Hr1G101600.1;HORVU7Hr1G104300.1;HORVU2Hr1G045920.1	1	HORVU5Hr1G081590.1 HORVU5Hr1G081590	chr5H:565124883-565128809	HC_G	60S ribosomal protein L44	GO:0003735, GO:0005622, GO:0005840, GO:0006412	PF00935	IPR000552, IPR011332	3	NA	0.0998896	0.15008	0.163894	0.275468	0.314833	0.36789	0.757182	505	-0.373544	0.0202252	0.34143	-0.046415
eL42_RPL36aA,eL42_RPL36aB	AT3G23390,AT4G14320	sp|O23290|RL36A_ARATH 60S ribosomal protein L36a OS=Arabidopsis thaliana OX=3702 GN=RPL36AA PE=3 SV=3	142.2	HORVU5Hr1G081590.1;HORVU5Hr1G101600.1;HORVU7Hr1G104300.1;HORVU2Hr1G045920.1	2	HORVU5Hr1G101600.1 HORVU5Hr1G101600	chr5H:612888182-612890622	HC_G	60S ribosomal protein L44	GO:0003735, GO:0005622, GO:0005840, GO:0006412	PF00935	IPR000552, IPR011332	3	NA	0.0998896	0.15008	0.163894	0.275468	0.314833	0.36789	0.757182	505	-0.373544	0.0202252	0.34143	-0.046415
eL42_RPL36aA,eL42_RPL36aB	AT3G23390,AT4G14320	sp|O23290|RL36A_ARATH 60S ribosomal protein L36a OS=Arabidopsis thaliana OX=3702 GN=RPL36AA PE=3 SV=3	110.2	HORVU5Hr1G081590.1;HORVU5Hr1G101600.1;HORVU7Hr1G104300.1;HORVU2Hr1G045920.1	3	HORVU7Hr1G104300.1 HORVU7Hr1G104300	chr7H:614313968-614318441	HC_G	60S ribosomal protein L44	GO:0003735, GO:0005622, GO:0005840, GO:0006412	PF00935	IPR000552, IPR011332	3	NA	0.0998896	0.15008	0.163894	0.275468	0.314833	0.36789	0.757182	505	-0.373544	0.0202252	0.34143	-0.046415
eL42_RPL36aA,eL42_RPL36aB	AT3G23390,AT4G14320	sp|O23290|RL36A_ARATH 60S ribosomal protein L36a OS=Arabidopsis thaliana OX=3702 GN=RPL36AA PE=3 SV=3	74.2003	HORVU5Hr1G081590.1;HORVU5Hr1G101600.1;HORVU7Hr1G104300.1;HORVU2Hr1G045920.1	4	HORVU2Hr1G045920.1 HORVU2Hr1G045920	chr2H:242047594-242049629	HC_G	60S ribosomal protein L44	GO:0003735, GO:0005622, GO:0005840, GO:0006412	PF00935	IPR000552, IPR011332	3	NA	0.0998896	0.15008	0.163894	0.275468	0.314833	0.36789	0.757182	505	-0.373544	0.0202252	0.34143	-0.046415
eL18_RPL18C	AT5G27850	sp|Q940B0|RL183_ARATH 60S ribosomal protein L18-3 OS=Arabidopsis thaliana OX=3702 GN=RPL18C PE=2 SV=1	495.886	HORVU2Hr1G018820.1	1	HORVU2Hr1G018820.1 HORVU2Hr1G018820	chr2H:48473942-48476008	HC_G	60S ribosomal protein L18-2	GO:0003735, GO:0005622, GO:0005840, GO:0006412	none	IPR021131, IPR021132	3	NA	8.93627e-05	0.297536	0.643467	0.552317	0.848288	0.96718	0.758277	487	-0.290233	0.145264	0.263269	-0.187998
tRNA-P	AT1G69410	sp|Q9FYR6|SYPM_ARATH Proline--tRNA ligase, chloroplastic/mitochondrial OS=Arabidopsis thaliana OX=3702 GN=OVA6 PE=2 SV=1	1032.27	HORVU2Hr1G057880.3	1	HORVU2Hr1G057880.3 HORVU2Hr1G057880	chr2H:373690065-373694302	HC_G	Proline--tRNA ligase	GO:0000166, GO:0004812, GO:0004827, GO:0005524, GO:0005737, GO:0006418, GO:0006433	PF00587, PF03129, PF09180	IPR002314, IPR002316, IPR004154, IPR004499, IPR006195, IPR016061, IPR017449	5	NA	0.176371	0.579691	0.904042	0.659974	0.752597	0.846497	0.759114	2233	-0.0608646	0.0891624	0.0580176	-0.156891
eL24_RPL24B	AT3G53020	sp|P38666|RL242_ARATH 60S ribosomal protein L24-2 OS=Arabidopsis thaliana OX=3702 GN=RPL24B PE=1 SV=2	402.919	HORVU3Hr1G080130.4	1	HORVU3Hr1G080130.4 HORVU3Hr1G080130	chr3H:587003525-587006162	HC_G	60S ribosomal protein L24	none	PF01246	IPR000988, IPR011017, IPR023441, IPR023442	3	NA	0.00793805	0.616362	0.53662	0.309308	0.462215	0.576942	0.774481	384	-0.331294	0.0399953	0.239227	-0.130074
uS9_RPS16A	AT2G09990	sp|Q9SK22|RS161_ARATH 40S ribosomal protein S16-1 OS=Arabidopsis thaliana OX=3702 GN=RPS16A PE=2 SV=1	216.989	HORVU4Hr1G023530.1;HORVU4Hr1G023570.2	1	HORVU4Hr1G023530.1 HORVU4Hr1G023530	chr4H:128540137-128544405	HC_G	30S ribosomal protein S9	GO:0003735, GO:0005840, GO:0006412	PF00380	IPR000754, IPR014721, IPR020568, IPR020574	3	NA	0.000175563	0.467351	0.197888	0.0247843	0.552558	0.460801	0.776184	386	-0.49904	0.0801495	0.463638	-0.14543
uS9_RPS16A	AT2G09990	sp|Q9SK22|RS161_ARATH 40S ribosomal protein S16-1 OS=Arabidopsis thaliana OX=3702 GN=RPS16A PE=2 SV=1	10.9894	HORVU4Hr1G023530.1;HORVU4Hr1G023570.2	2	HORVU4Hr1G023570.2 HORVU4Hr1G023570	chr4H:129094028-129096697	HC_G	30S ribosomal protein S9	GO:0003735, GO:0005840, GO:0006412	PF00380	IPR000754, IPR014721, IPR020568, IPR020574	3	NA	0.000175563	0.467351	0.197888	0.0247843	0.552558	0.460801	0.776184	386	-0.49904	0.0801495	0.463638	-0.14543
eL24_RPL24A	AT2G36620	sp|Q42347|RL241_ARATH 60S ribosomal protein L24-1 OS=Arabidopsis thaliana OX=3702 GN=RPL24A PE=1 SV=2	348.416	HORVU5Hr1G111510.1	1	HORVU5Hr1G111510.1 HORVU5Hr1G111510	chr5H:636519839-636522284	HC_G	60S ribosomal protein L24	none	PF01246	IPR000988, IPR011017, IPR023441, IPR023442	3	NA	0.000342585	0.998715	0.675637	0.0495694	0.517688	0.998776	0.785742	534	-0.207369	0.250965	0.0642915	-0.478346
eL19_RPL19C	AT4G02230	sp|P49693|RL193_ARATH 60S ribosomal protein L19-3 OS=Arabidopsis thaliana OX=3702 GN=RPL19C PE=2 SV=3	557.447	HORVU4Hr1G049670.2	1	HORVU4Hr1G049670.2 HORVU4Hr1G049670	chr4H:403634462-403636621	HC_G	60S ribosomal protein L19-1	GO:0003735, GO:0005622, GO:0005840, GO:0006412	PF01280	IPR000196, IPR015972, IPR015974, IPR023638	3	NA	0.128688	0.233634	0.45273	0.365417	0.116076	0.469827	0.813675	383	-0.3398	0.111971	0.244828	-0.0500596
eL27_RPL27C	AT4G15000	sp|P51419|RL273_ARATH 60S ribosomal protein L27-3 OS=Arabidopsis thaliana OX=3702 GN=RPL27C PE=2 SV=2	253.997	HORVU7Hr1G063280.1;HORVU5Hr1G054100.1;HORVU2Hr1G086470.1;HORVU2Hr1G086480.1;HORVU5Hr1G054090.1;HORVU5Hr1G054130.1;HORVU5Hr1G054120.1;HORVU5Hr1G054110.2;HORVU2Hr1G086450.1	3	HORVU2Hr1G086470.1 HORVU2Hr1G086470	chr2H:623362665-623363076	HC_G	60S ribosomal protein L27-3	GO:0003735, GO:0005622, GO:0005840, GO:0006412	PF00467, PF01777	IPR001141, IPR005824, IPR008991, IPR014722	3	NA	2.05555e-05	0.185627	0.0336241	0.920406	0.292705	0.152071	0.828145	490	-0.447279	0.211983	0.2668	-0.34336
eL27_RPL27C	AT4G15000	sp|P51419|RL273_ARATH 60S ribosomal protein L27-3 OS=Arabidopsis thaliana OX=3702 GN=RPL27C PE=2 SV=2	253.997	HORVU7Hr1G063280.1;HORVU5Hr1G054100.1;HORVU2Hr1G086470.1;HORVU2Hr1G086480.1;HORVU5Hr1G054090.1;HORVU5Hr1G054130.1;HORVU5Hr1G054120.1;HORVU5Hr1G054110.2;HORVU2Hr1G086450.1	4	HORVU2Hr1G086480.1 HORVU2Hr1G086480	chr2H:623446142-623446553	HC_G	60S ribosomal protein L27-3	GO:0003735, GO:0005622, GO:0005840, GO:0006412	PF00467, PF01777	IPR001141, IPR005824, IPR008991, IPR014722	3	NA	2.05555e-05	0.185627	0.0336241	0.920406	0.292705	0.152071	0.828145	490	-0.447279	0.211983	0.2668	-0.34336
eL27_RPL27C	AT4G15000	sp|P51419|RL273_ARATH 60S ribosomal protein L27-3 OS=Arabidopsis thaliana OX=3702 GN=RPL27C PE=2 SV=2	253.997	HORVU7Hr1G063280.1;HORVU5Hr1G054100.1;HORVU2Hr1G086470.1;HORVU2Hr1G086480.1;HORVU5Hr1G054090.1;HORVU5Hr1G054130.1;HORVU5Hr1G054120.1;HORVU5Hr1G054110.2;HORVU2Hr1G086450.1	9	HORVU2Hr1G086450.1 HORVU2Hr1G086450	chr2H:623292054-623292464	HC_G	60S ribosomal protein L27-3	GO:0003735, GO:0005622, GO:0005840, GO:0006412	PF00467, PF01777	IPR001141, IPR005824, IPR008991, IPR014722	3	NA	2.05555e-05	0.185627	0.0336241	0.920406	0.292705	0.152071	0.828145	490	-0.447279	0.211983	0.2668	-0.34336
eL27_RPL27B	AT3G22230	sp|Q8LCL3|RL272_ARATH 60S ribosomal protein L27-2 OS=Arabidopsis thaliana OX=3702 GN=RPL27B PE=2 SV=2	203.755	HORVU7Hr1G063280.1;HORVU5Hr1G054100.1;HORVU2Hr1G086470.1;HORVU2Hr1G086480.1;HORVU5Hr1G054090.1;HORVU5Hr1G054130.1;HORVU5Hr1G054120.1;HORVU5Hr1G054110.2;HORVU2Hr1G086450.1	1	HORVU7Hr1G063280.1 HORVU7Hr1G063280	chr7H:310310675-310312034	HC_G	60S ribosomal protein L27-3	GO:0003735, GO:0005622, GO:0005840, GO:0006412	PF00467, PF01777	IPR001141, IPR005824, IPR008991, IPR014722	3	NA	2.05555e-05	0.185627	0.0336241	0.920406	0.292705	0.152071	0.828145	490	-0.447279	0.211983	0.2668	-0.34336
BCAT5	AT1G69410	sp|Q9FYA6|BCAT5_ARATH Branched-chain-amino-acid aminotransferase 5, chloroplastic OS=Arabidopsis thaliana OX=3702 GN=BCAT5 PE=1 SV=1	92.9433	HORVU4Hr1G087100.6	1	HORVU4Hr1G087100.6 HORVU4Hr1G087100	chr4H:636198197-636202886	HC_G	Branched-chain-amino-acid aminotransferase 6	GO:0000166, GO:0003824, GO:0004084, GO:0004812, GO:0005524, GO:0006418, GO:0008152, GO:0009081	PF01063	IPR001412, IPR001544, IPR005786, IPR018300	5	NA	0.508655	0.767966	0.431316	0.254871	0.599774	0.512981	0.851924	2062	-0.0231985	0.111762	-0.00727164	-0.124647
ERF1Z	AT3G26618	sp|P35614|ERF1Z_ARATH Eukaryotic peptide chain release factor subunit 1-3 OS=Arabidopsis thaliana OX=3702 GN=ERF1-3 PE=1 SV=1	1293.74	HORVU2Hr1G035400.1	1	HORVU2Hr1G035400.1 HORVU2Hr1G035400	chr2H:149783056-149787027	HC_G	Eukaryotic peptide chain release factor subunit 1-3	GO:0005737, GO:0006415, GO:0016149	PF03463, PF03464, PF03465	IPR004403, IPR005140, IPR005141, IPR005142, IPR024049, IPR029064	5	NA	0.0706694	0.669493	0.996409	0.235843	0.729312	0.790441	0.886588	1630	-0.0865175	0.110875	-0.0675446	-0.26089
eS21_RPS21C	AT5G27700	sp|Q3E902|RS212_ARATH 40S ribosomal protein S21-2 OS=Arabidopsis thaliana OX=3702 GN=RPS21C PE=1 SV=2	129.06	HORVU2Hr1G019960.2	1	HORVU2Hr1G019960.2 HORVU2Hr1G019960	chr2H:52785272-52787781	HC_G	40S ribosomal protein S21	GO:0003735, GO:0005622, GO:0005840, GO:0006412	PF01249	IPR001931, IPR018279	3	X1632	0.0178212	0.0474217	0.0051364	0.234103	0.319093	0.372856	0.908242	571	-0.514798	0.0822802	0.353037	0.00421587
eL8_RPL7aA	AT2G47610	sp|P49692|RL7A1_ARATH 60S ribosomal protein L7a-1 OS=Arabidopsis thaliana OX=3702 GN=RPL7AA PE=2 SV=2	636.019	HORVU5Hr1G076700.2	1	HORVU5Hr1G076700.2 HORVU5Hr1G076700	chr5H:551809410-551811794	HC_G	60S ribosomal protein L7a	GO:0030529, GO:0042254	PF01248	IPR001921, IPR004037, IPR004038, IPR018492, IPR029064	3	NA	2.61057e-05	0.857035	0.715219	0.888592	0.984629	0.80542	0.97309	491	-0.357945	0.150451	0.189029	-0.333931

## Sheet: S7C
Supplementary Table 7C. RP families and paralogs identified in this study. Paralogs with unique peptides are separated by "and", paralogs with non-unique peptides are separated by "or".
Family	Paralog
eL13	RPL13B
eL14	RPL14A
eL15	RPL15A
eL18	RPL18B and C
eL19	RPL19C
eL20	RPL18aB
eL21	RPL21A, C, E or G
eL22	RPL22B
eL24	RPL24A and B
eL27	RPL27B and C
eL28	RPL28A
eL29	RPL29A
eL30	RPL30C
eL31	RPL31A and C
eL32	RPL32A
eL33	RPL35aC
eL34	RPL34A
eL36	RPL36B
eL37	RPL37B
eL38	RPL38A or B
eL40	RPL40A
eL42	RPL36aA or aB
eL43	RPL37aB
eL6	RPL6C
eL8	RPL7aA
eS1	RPS3aB
eS10	RPS10A
eS12	RPS12A
eS17	RPS17D
eS19	RPS19C
eS21	RPS21C
eS24	RPS24A
eS25	RPS25B
eS26	RPS26C
eS27	RPS27B
eS28	RPS28A or B
eS31	RPS27aB
eS4	RPS4D
eS6	RPS6B
eS7	RPS7B
eS8	RPS8B
P1	RPP1B
P2	RPP2A
RPS12 or RPS7	mito12 or 7
RPS3	mito3
uL1	RPL10aA and aC
uL10	RPP0A
uL11	RPL12C
uL13	RPL13aB and aD
uL14	RPL23A, B or C
uL16	RPL10B
uL18	RPL5A
uL2	RPL8A
uL22	RPL17B
uL24	RPL26A
uL29	RPL35D
uL3	RPL3A
uL30	RPL7B and C
uL4	RPL4A and D
uL5	RPL11A
uL6	RPL9B or C
uS10	RPS20A or C
uS11	RPS14C
uS12	RPS23B
uS13	RPS18A, B or C
uS14	RPS29A, B or C
uS15	RPS13B
uS17	RPS11C
uS19	RPS15D
uS2	RPSaA
uS3	RPS3C
uS4	RPS9C
uS5	RPS2D
uS7	RPS5A
uS8	RPS15aA or aF
uS9	RPS16A
